# Supplementary material for: Proteome and phosphoproteome reveal mechanisms of action of atorvastatin against esophageal squamous cell carcinoma
Source: publisher site journal article supplement (doi:10.18632/aging.102402), 2019-11-07
Supplement: Supplementary file [file aging-v11i21-102402-supplementary-material-SD1.pdf]

SUPPLEMENTARY FIGURE

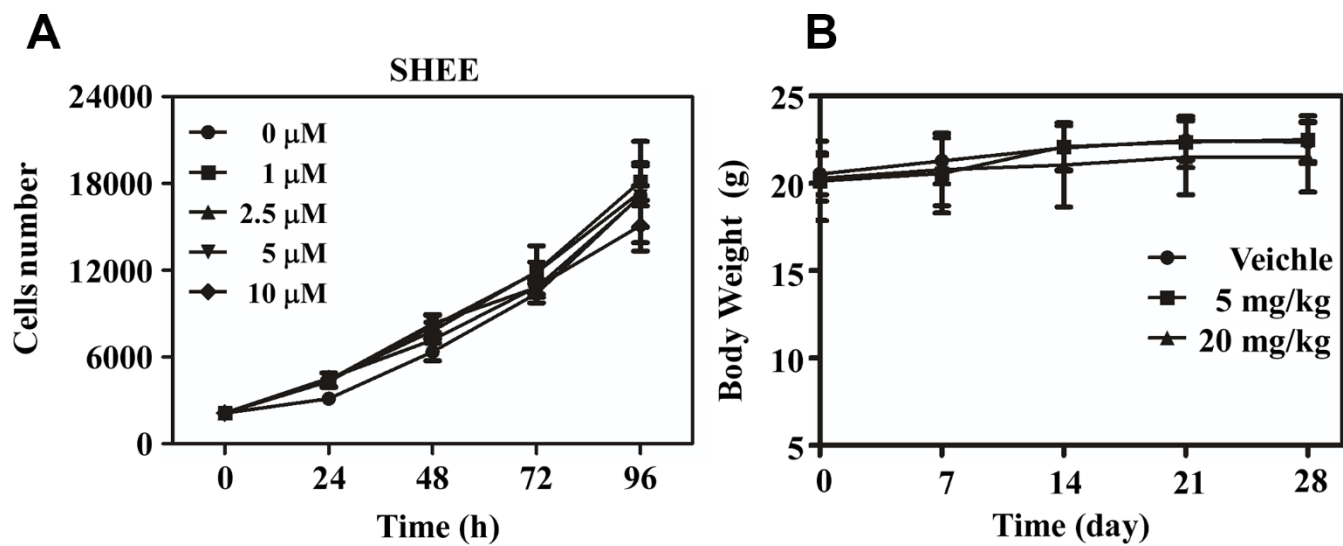

**Supplementary Figure 1.** (A) Atorvastatin has no cytotoxicity against normal esophageal epithelial cell lines, SHEE, at the same concentration. (B) Atorvastatin has no toxicity in mice body weight.
