# Supplementary material for: Proteome and phosphoproteome reveal mechanisms of action of atorvastatin against esophageal squamous cell carcinoma
Source: Aging (Albany NY). 2019 Nov 7;11(21):9530–43. doi: 10.18632/aging.102402 (PMC6874460; doi:10.18632/aging.102402)
Supplement: Supplementary Table 1 [file aging-11-102402-s003.csv]

Protein accession	Protein description	Gene name	Sequence coverage [%]	Mol. weight [kDa]	Score	MS/MS Counts	Peptides	Unique peptides	MS/MS Count rep1_Ctrl	MS/MS Count rep1_YA1	MS/MS Count rep2_Ctrl	MS/MS Count rep2_YA1	MS/MS Count rep3_Ctrl	MS/MS Count rep3_YA1	Peptides rep1_Ctrl	Peptides rep1_YA1	Peptides rep2_Ctrl	Peptides rep2_YA1	Peptides rep3_Ctrl	Peptides rep3_YA1	Unique peptides rep1_Ctrl	Unique peptides rep1_YA1	Unique peptides rep2_Ctrl	Unique peptides rep2_YA1	Unique peptides rep3_Ctrl	Unique peptides rep3_YA1	LFQ intensity rep1_Ctrl	LFQ intensity rep1_YA1	LFQ intensity rep2_Ctrl	LFQ intensity rep2_YA1	LFQ intensity rep3_Ctrl	LFQ intensity rep3_YA1	rep1_Ctrl	rep1_YA1	rep2_Ctrl	rep2_YA1	rep3_Ctrl	rep3_YA1	YA1/Ctr Ratio	YA1/Ctr P value
A0AV96	RNA-binding protein 47	RBM47	28	64.098	63.582	101	14	13	18	18	18	16	15	16	14	14	14	14	12	14	13	13	13	13	11	13	686130000	683230000	716620000	773120000	726300000	778500000	0.943	0.939	0.985	1.063	0.999	1.07	1.05	3.48E-01
A0AVT1	Ubiquitin-like modifier-activating enzyme 6	UBA6	40	117.97	200.71	120	31	31	21	20	19	20	20	20	23	26	24	24	24	22	23	26	24	24	24	22	869590000	982830000	896420000	945600000	832510000	949270000	0.953	1.077	0.982	1.036	0.912	1.04	1.107	1.34E-02
A0FGR8	Extended synaptotagmin-2	ESYT2	35.9	102.36	100.96	111	23	23	18	21	15	18	20	19	20	20	20	21	21	20	20	20	20	21	21	20	1440600000	1345000000	1373000000	1241600000	1459500000	1286600000	1.061	0.991	1.011	0.914	1.075	0.948	0.906	2.86E-02
A0JLT2	Mediator of RNA polymerase II transcription subunit 19	MED19	25	26.273	4.0662	5	3	3	0	1	0	3	1	0	1	2	0	3	2	1	1	2	0	3	2	1	0	62460000	0	75494000	65129000	0		0.923		1.115	0.962		1.059
A0MZ66	Shootin-1	SHTN1	37.7	71.639	79.166	75	18	18	11	15	13	13	10	13	15	15	16	16	14	17	15	15	16	16	14	17	482880000	549620000	513320000	589360000	493890000	524800000	0.919	1.046	0.977	1.121	0.94	0.998	1.117	4.97E-02
A0PJW6	Transmembrane protein 223	TMEM223	17.8	22.049	6.3139	22	4	4	4	2	4	3	5	4	3	3	3	3	4	3	3	3	3	3	4	3	129210000	95490000	132890000	107450000	130410000	117620000	1.087	0.803	1.118	0.904	1.097	0.99	0.817	2.09E-02
A0PK00	Transmembrane protein 120B	TMEM120B	10	40.245	22.636	12	2	2	2	2	2	2	3	1	1	2	2	2	2	1	1	2	2	2	2	1	107590000	88408000	80509000	92997000	72680000	76906000	1.244	1.022	0.931	1.075	0.84	0.889	0.991	9.47E-01
A1L0T0	Acetolactate synthase-like protein	ILVBL	35.4	67.867	98.95	81	14	14	15	11	12	13	15	15	13	12	13	13	13	14	13	12	13	13	13	14	840500000	791170000	811390000	789370000	767870000	773720000	1.056	0.994	1.02	0.992	0.965	0.972	0.973	3.74E-01
A1L170	Uncharacterized protein C1orf226	C1orf226	17.6	29.057	11.999	9	3	3	3	1	2	0	1	2	3	2	3	2	3	3	3	2	3	2	3	3	43626000	0	40753000	50796000	47334000	45220000	0.958		0.895	1.115	1.039	0.993	1.093	2.92E-01
A1L390	Pleckstrin homology domain-containing family G member 3	PLEKHG3	12.7	134.41	70.848	29	10	10	4	7	3	7	3	5	8	10	9	10	9	10	8	10	9	10	9	10	199170000	213740000	162430000	215240000	169990000	180010000	1.048	1.124	0.854	1.132	0.894	0.947	1.146	1.83E-01
A1L3X0	Elongation of very long chain fatty acids protein 7	ELOVL7	9.3	33.356	5.1957	12	3	3	2	2	2	2	2	2	3	3	3	3	3	3	3	3	3	3	3	3	51652000	56664000	0	55951000	76101000	62191000	0.854	0.936		0.925	1.258	1.028	0.912	5.95E-01
A2RRP1	Neuroblastoma-amplified sequence	NBAS	9.8	268.57	61.975	49	17	17	7	10	8	6	10	8	12	13	14	12	15	12	12	13	14	12	15	12	272690000	202510000	243720000	213610000	233790000	232090000	1.17	0.869	1.046	0.917	1.003	0.996	0.864	7.91E-02
A2RU67	Protein FAM234B	FAM234B	12.4	67.038	19.512	10	5	5	2	2	3	0	3	0	3	2	3	2	4	2	3	2	3	2	4	2	38966000	36165000	41295000	37556000	47916000	31986000	1	0.928	1.059	0.963	1.229	0.821	0.825	7.68E-02
A3KMH1	von Willebrand factor A domain-containing protein 8	VWA8	26.4	214.82	147.94	131	39	39	26	18	21	22	24	20	34	34	36	33	33	35	34	34	36	33	33	35	1021300000	875590000	1010700000	850160000	1034100000	963790000	1.065	0.913	1.054	0.886	1.078	1.005	0.877	2.32E-02
A3KN83	Protein strawberry notch homolog 1	SBNO1	7	154.31	30.402	17	6	6	2	1	3	5	2	4	4	4	3	5	2	5	4	4	3	5	2	5	65779000	81442000	53762000	90470000	40828000	64297000	0.995	1.232	0.813	1.369	0.618	0.973	1.473	7.42E-02
A4D1E9	GTP-binding protein 10	GTPBP10	49.1	42.932	74.324	99	17	17	15	15	18	18	18	15	15	15	15	16	16	15	15	15	15	16	16	15	602320000	621520000	586820000	637490000	670180000	608180000	0.97	1.001	0.945	1.026	1.079	0.979	1.004	9.27E-01
A5PLL7	Transmembrane protein 189	TMEM189	13.3	31.135	8.7741	10	3	3	1	1	1	3	2	2	2	2	2	3	2	2	2	2	2	3	2	2	52002000	38121000	45920000	40335000	49382000	43549000	1.159	0.849	1.023	0.899	1.1	0.97	0.828	2.34E-02
A5YKK6	CCR4-NOT transcription complex subunit 1	CNOT1	23.9	266.94	203.08	231	48	48	37	39	40	40	34	41	37	41	39	44	41	46	37	41	39	44	41	46	1660200000	1699600000	1558500000	1621200000	1574300000	1673700000	1.018	1.042	0.955	0.994	0.965	1.026	1.042	1.61E-01
A6ND36	Protein FAM83G	FAM83G	9.1	90.834	11.15	11	6	6	1	3	2	1	2	2	2	3	3	4	3	4	2	3	3	4	3	4	37208000	65249000	33720000	45674000	46392000	71131000	0.746	1.308	0.676	0.915	0.93	1.426	1.552	6.56E-02
A6NFI3	Zinc finger protein 316	ZNF316	7.4	108.44	23.927	16	5	5	2	2	3	2	5	2	3	3	4	3	5	4	3	3	4	3	5	4	54033000	48622000	42833000	28118000	56316000	35123000	1.223	1.101	0.97	0.637	1.275	0.795	0.73	1.33E-01
A6NHQ2	rRNA/tRNA 2'-O-methyltransferase fibrillarin-like protein 1	FBLL1	11.1	34.803	7.0923	17	3	1	4	2	2	2	3	4	3	3	3	3	3	3	1	1	1	1	1	1	0	679140000	510700000	599160000	628290000	0		1.124	0.845	0.991	1.04		1.122	4.31E-01
A6NHR9	Structural maintenance of chromosomes flexible hinge domain-containing protein 1	SMCHD1	23.2	226.37	143.25	156	38	38	29	26	26	28	22	25	38	35	35	36	32	34	38	35	35	36	32	34	878460000	847610000	876530000	812200000	851380000	822050000	1.036	0.999	1.034	0.958	1.004	0.969	0.952	3.87E-02
A6NJ78	Probable methyltransferase-like protein 15	METTL15	30.5	46.121	51.629	49	10	10	7	7	11	7	9	8	9	10	10	9	9	9	9	10	10	9	9	9	225780000	172310000	217870000	197370000	207480000	186670000	1.122	0.856	1.083	0.981	1.031	0.928	0.854	2.46E-02
A6NKD9	Coiled-coil domain-containing protein 85C	CCDC85C	15.8	45.209	34.124	15	4	4	2	4	3	2	2	2	3	2	3	2	2	2	3	2	3	2	2	2	25616000	39444000	33314000	34453000	25957000	36235000	0.788	1.214	1.025	1.06	0.799	1.115	1.297	4.43E-02
A8CG34	Nuclear envelope pore membrane protein POM 121C	POM121C	19.9	125.06	109.56	56	15	3	7	7	8	11	11	12	11	12	13	12	13	14	2	2	2	3	3	3	512810000	440770000	478250000	404690000	491420000	412590000	1.123	0.965	1.047	0.886	1.076	0.903	0.849	7.34E-03
A8MQ03	Cysteine-rich tail protein 1	CYSRT1	24.3	15.313	7.5028	18	2	2	3	2	5	2	5	1	2	2	2	2	2	2	2	2	2	2	2	2	105680000	36834000	104510000	41431000	96137000	38010000	1.5	0.523	1.484	0.588	1.365	0.54	0.38	4.19E-05
A8MT70	Zinc finger B-box domain-containing protein 1	ZBBX	1.9	91.425	1.6927	11	2	2	2	2	2	2	1	2	2	2	2	2	2	2	2	2	2	2	2	2	302510000	246000000	327790000	259900000	291520000	277790000	1.064	0.865	1.153	0.914	1.026	0.977	0.85	3.12E-02
A8MXV4	Nucleoside diphosphate-linked moiety X motif 19	NUDT19	51.7	42.233	100.49	81	15	15	12	10	15	16	15	13	12	13	14	13	13	14	12	13	14	13	13	14	742870000	763220000	789860000	794510000	775900000	696880000	0.977	1.004	1.039	1.045	1.02	0.916	0.977	6.03E-01
C9JLW8	Mapk-regulated corepressor-interacting protein 1	MCRIP1	39.2	10.92	5.552	11	3	3	2	1	2	2	2	2	3	1	3	2	2	2	3	1	3	2	2	2	55609000	0	79691000	68363000	46298000	58680000	0.901		1.291	1.107	0.75	0.951	1.049	8.37E-01
E9PRG8	Uncharacterized protein C11orf98	C11orf98	17.2	13.798	3.898	8	2	2	1	1	1	2	2	1	2	1	1	2	1	1	2	1	1	2	1	1	209050000	0	0	179760000	0	0	1.075			0.925			0.86
O00115	Deoxyribonuclease-2-alpha	DNASE2	15	39.58	10.897	30	5	5	4	6	4	5	6	5	5	4	5	5	5	4	5	4	5	5	5	4	347400000	290910000	350680000	315370000	365110000	364750000	1.025	0.858	1.034	0.93	1.077	1.076	0.913	2.42E-01
O00116	Alkyldihydroxyacetonephosphate synthase, peroxisomal	AGPS	52.4	72.911	181.77	206	22	22	35	33	35	35	34	34	22	22	22	22	21	21	22	22	22	22	21	21	4388000000	4775500000	4728900000	4439100000	4647000000	4736900000	0.95	1.034	1.024	0.961	1.006	1.025	1.014	6.94E-01
O00139	Kinesin-like protein KIF2A	KIF2A	19.5	79.954	41.848	53	10	10	7	10	9	9	8	10	7	10	10	8	9	9	7	10	10	8	9	9	356180000	350660000	311890000	364810000	309560000	366570000	1.038	1.022	0.909	1.063	0.902	1.068	1.107	9.50E-02
O00142	Thymidine kinase 2, mitochondrial	TK2	14.3	31.004	5.9084	13	4	4	2	1	4	1	2	3	2	2	4	1	3	3	2	2	4	1	3	3	0	33894000	25983000	0	34035000	29260000		1.101	0.844		1.105	0.95	1.052	7.68E-01
O00148	ATP-dependent RNA helicase DDX39A	DDX39A	57.8	49.129	65.504	105	21	10	17	23	15	17	12	21	21	20	20	20	20	21	10	9	9	9	9	10	1931100000	2286600000	2002100000	2206200000	2104600000	2502800000	0.889	1.053	0.922	1.016	0.969	1.152	1.159	3.51E-02
O00151	PDZ and LIM domain protein 1	PDLIM1	82.4	36.071	301.59	215	21	21	31	35	33	40	35	41	21	20	21	21	20	21	21	20	21	21	20	21	7489900000	11506000000	8160300000	11234000000	7702400000	11028000000	0.787	1.209	0.857	1.18	0.809	1.158	1.446	1.38E-04
O00154	Cytosolic acyl coenzyme A thioester hydrolase	ACOT7	33.9	41.796	34.22	78	10	10	12	12	14	12	13	15	10	10	10	10	10	10	10	10	10	10	10	10	767120000	736470000	790880000	790960000	745410000	798360000	0.994	0.955	1.025	1.025	0.966	1.035	1.01	7.67E-01
O00159	Unconventional myosin-Ic	MYO1C	53.8	121.68	314.62	359	48	47	50	67	48	67	58	69	41	48	44	46	46	47	40	47	43	45	45	46	3463700000	6258200000	3737400000	6620800000	3569400000	6799200000	0.683	1.233	0.736	1.305	0.703	1.34	1.827	7.78E-05
O00161	Synaptosomal-associated protein 23	SNAP23	62.6	23.354	114.39	111	11	11	16	19	20	18	20	18	11	11	11	11	11	11	11	11	11	11	11	11	2011700000	2016500000	1985500000	2136500000	2259000000	1843700000	0.985	0.987	0.972	1.046	1.106	0.903	0.959	5.17E-01
O00165	HCLS1-associated protein X-1	HAX1	50.5	31.62	52.638	49	9	9	8	8	10	8	8	7	9	7	9	8	9	7	9	7	9	8	9	7	309310000	287050000	256790000	258810000	311880000	244480000	1.112	1.032	0.924	0.931	1.122	0.879	0.9	2.53E-01
O00170	AH receptor-interacting protein	AIP	42.1	37.636	42.204	56	11	11	10	8	10	10	9	9	11	10	11	10	9	10	11	10	11	10	9	10	401790000	426270000	413420000	426240000	386320000	415790000	0.976	1.036	1.004	1.035	0.938	1.01	1.056	6.06E-02
O00186	Syntaxin-binding protein 3	STXBP3	46.3	67.764	99.463	151	25	25	23	28	25	27	25	23	23	25	24	24	22	22	23	25	24	24	22	22	1264300000	1338700000	1343300000	1325800000	1236000000	1251400000	0.978	1.035	1.039	1.025	0.956	0.968	1.019	5.98E-01
O00192	Armadillo repeat protein deleted in velo-cardio-facial syndrome	ARVCF	29	104.64	139.08	80	19	19	15	11	12	12	15	15	16	16	15	14	15	17	16	16	15	14	15	17	428650000	380160000	452860000	340640000	420670000	408730000	1.058	0.938	1.117	0.84	1.038	1.009	0.867	5.89E-02
O00193	Small acidic protein	SMAP	29.5	20.332	39.955	27	4	4	3	5	4	4	5	6	4	4	4	4	4	4	4	4	4	4	4	4	341290000	387080000	334530000	340680000	363200000	390180000	0.949	1.077	0.931	0.948	1.01	1.085	1.076	2.22E-01
O00194	Ras-related protein Rab-27B	RAB27B	27.5	24.608	8.7905	17	6	5	3	2	4	2	4	2	5	3	5	4	6	4	4	2	4	3	5	3	141360000	75566000	133560000	76115000	124910000	73436000	1.357	0.725	1.282	0.731	1.199	0.705	0.563	2.65E-04
O00203	AP-3 complex subunit beta-1	AP3B1	19	121.32	44.793	72	20	20	11	17	10	9	10	15	18	19	18	19	18	20	18	19	18	19	18	20	576250000	626330000	599130000	676310000	540600000	642780000	0.944	1.026	0.982	1.108	0.886	1.053	1.134	2.73E-02
O00212	Rho-related GTP-binding protein RhoD	RHOD	31	23.413	38.028	17	6	6	4	2	3	2	2	4	6	4	5	5	5	5	6	4	5	5	5	5	97883000	45654000	101660000	59605000	114070000	64057000	1.216	0.567	1.263	0.741	1.417	0.796	0.54	2.88E-03
O00214	Galectin-8	LGALS8	27.4	35.808	20.961	43	9	9	8	6	8	5	11	5	7	7	8	7	9	7	7	7	8	7	9	7	558410000	458140000	575690000	459390000	573980000	408740000	1.104	0.906	1.138	0.908	1.135	0.808	0.776	1.92E-03
O00217	NADH dehydrogenase [ubiquinone] iron-sulfur protein 8, mitochondrial	NDUFS8	40	23.705	23.847	53	8	8	10	8	10	8	10	7	8	7	8	7	8	7	8	7	8	7	8	7	1099500000	1044400000	1208400000	1114200000	1024600000	993990000	1.017	0.966	1.118	1.031	0.948	0.92	0.946	4.00E-01
O00220	Tumor necrosis factor receptor superfamily member 10A	TNFRSF10A	8.1	50.089	6.2731	14	3	3	2	2	4	3	1	2	3	3	3	3	2	3	3	3	3	3	2	3	83004000	48981000	63914000	64854000	83960000	63998000	1.219	0.719	0.938	0.952	1.233	0.94	0.77	1.01E-01
O00231	26S proteasome non-ATPase regulatory subunit 11	PSMD11	62.8	47.463	106.2	204	22	22	34	36	32	33	30	39	21	21	21	19	21	20	21	21	21	19	21	20	3190800000	3624200000	3183800000	3570600000	3260000000	3516200000	0.941	1.069	0.939	1.053	0.961	1.037	1.112	8.19E-04
O00232	26S proteasome non-ATPase regulatory subunit 12	PSMD12	59.6	52.904	166.37	185	24	24	28	32	26	34	33	32	22	23	23	24	24	22	22	23	23	24	24	22	2826200000	3069500000	2703500000	3005700000	2685200000	2983900000	0.982	1.066	0.939	1.044	0.933	1.036	1.103	5.34E-03
O00233	26S proteasome non-ATPase regulatory subunit 9	PSMD9	44.8	24.682	95.184	63	10	10	9	12	10	12	8	12	9	9	9	9	9	10	9	9	9	9	9	10	513860000	634630000	545900000	672370000	547500000	702910000	0.852	1.053	0.906	1.115	0.908	1.166	1.251	4.02E-03
O00244	Copper transport protein ATOX1	ATOX1	76.5	7.4016	31.531	30	4	4	7	6	5	4	4	4	3	4	3	4	4	4	3	4	3	4	4	4	767780000	661230000	739250000	895870000	959020000	835310000	0.948	0.817	0.913	1.106	1.184	1.032	0.97	8.16E-01
O00255	Menin	MEN1	14.5	68.023	66.645	16	5	5	2	3	3	2	2	4	4	4	5	3	4	5	4	4	5	3	4	5	151270000	153990000	165740000	154080000	174300000	168040000	0.938	0.955	1.028	0.956	1.081	1.042	0.969	5.69E-01
O00264	Membrane-associated progesterone receptor component 1	PGRMC1	30.8	21.671	25.348	60	6	5	9	10	12	10	10	9	6	6	6	6	6	6	5	5	5	5	5	5	1485900000	1444100000	1551800000	1621400000	1555900000	1378700000	0.986	0.959	1.03	1.076	1.033	0.915	0.967	5.48E-01
O00267	Transcription elongation factor SPT5	SUPT5H	44.2	121	271.75	251	39	39	39	41	36	49	41	45	35	36	37	36	38	37	35	36	37	36	38	37	2621900000	2499200000	2472800000	2460100000	2581500000	2712700000	1.025	0.977	0.967	0.962	1.009	1.06	0.999	9.88E-01
O00268	Transcription initiation factor TFIID subunit 4	TAF4	15.3	110.11	88.436	38	10	10	6	6	6	7	6	7	7	9	9	8	8	6	7	9	9	8	8	6	336110000	317360000	337220000	326280000	338580000	354570000	1.003	0.947	1.007	0.974	1.011	1.058	0.986	7.24E-01
O00273	DNA fragmentation factor subunit alpha	DFFA	35	36.521	53.8	64	9	9	8	12	9	12	10	13	8	9	8	8	8	8	8	9	8	8	8	8	675340000	707620000	561420000	689390000	597550000	725830000	1.024	1.073	0.851	1.045	0.906	1.101	1.157	5.24E-02
O00291	Huntingtin-interacting protein 1	HIP1	39.2	116.22	256.84	151	34	32	24	23	27	25	28	24	26	28	28	27	28	28	25	26	26	25	27	26	1631300000	1364900000	1533600000	1524600000	1528700000	1532700000	1.074	0.898	1.009	1.003	1.006	1.009	0.942	2.31E-01
O00299	Chloride intracellular channel protein 1	CLIC1	78.8	26.922	97.704	128	13	13	23	22	16	23	20	24	13	13	13	13	13	13	13	13	13	13	13	13	2228300000	3014300000	2178800000	3070900000	2314300000	3245600000	0.833	1.127	0.814	1.148	0.865	1.213	1.388	4.04E-04
O00303	Eukaryotic translation initiation factor 3 subunit F	EIF3F	33.9	37.563	73.511	73	10	10	11	11	11	13	13	14	10	10	10	10	10	10	10	10	10	10	10	10	1432800000	1901800000	1502300000	2067900000	1568900000	1977500000	0.823	1.092	0.862	1.187	0.901	1.135	1.32	1.50E-03
O00308	NEDD4-like E3 ubiquitin-protein ligase WWP2	WWP2	10.1	98.911	17.712	19	9	6	2	2	3	3	3	6	6	6	9	7	9	8	4	4	6	5	6	6	72655000	62448000	70487000	72819000	66568000	67146000	1.058	0.909	1.026	1.06	0.969	0.978	0.965	5.24E-01
O00330	Pyruvate dehydrogenase protein X component, mitochondrial	PDHX	46.3	54.122	176.01	100	18	18	17	20	18	16	15	14	17	17	18	16	15	16	17	17	18	16	15	16	1319800000	1285600000	1217000000	1224000000	1327000000	1201300000	1.045	1.018	0.964	0.97	1.051	0.952	0.96	3.07E-01
O00400	Acetyl-coenzyme A transporter 1	SLC33A1	10.6	60.908	10.955	19	5	5	4	2	4	2	4	3	4	3	4	3	5	3	4	3	4	3	5	3	116920000	100830000	114830000	92227000	122480000	105160000	1.075	0.927	1.056	0.848	1.126	0.967	0.842	1.36E-02
O00401	Neural Wiskott-Aldrich syndrome protein	WASL	3.2	54.826	2.0796	8	2	2	1	1	1	2	1	2	2	2	2	2	2	2	2	2	2	2	2	2	44925000	44314000	41960000	41325000	42943000	44970000	1.035	1.021	0.967	0.952	0.989	1.036	1.006	8.64E-01
O00410	Importin-5	IPO5	55.8	123.63	291.43	283	42	41	48	50	47	46	48	44	40	41	40	39	40	41	39	40	39	38	39	40	4759500000	4950800000	4352600000	4841400000	5123200000	5421400000	0.97	1.009	0.887	0.986	1.044	1.105	1.069	3.16E-01
O00411	DNA-directed RNA polymerase, mitochondrial	POLRMT	32	138.62	143.73	105	26	26	18	16	17	15	22	17	22	22	22	22	22	20	22	22	22	22	22	20	656890000	678460000	733380000	631970000	728990000	673220000	0.961	0.992	1.072	0.924	1.066	0.985	0.936	1.92E-01
O00422	Histone deacetylase complex subunit SAP18	SAP18	75.8	17.561	104.99	95	12	12	17	16	16	15	15	16	11	11	12	11	10	11	11	11	12	11	10	11	968870000	957520000	1005000000	974070000	997830000	1027300000	0.98	0.969	1.017	0.985	1.01	1.039	0.996	8.66E-01
O00429	Dynamin-1-like protein	DNM1L	71.1	81.876	271.27	199	40	40	30	37	29	36	27	40	35	38	35	35	35	36	35	38	35	35	35	36	1461400000	1709000000	1451100000	1637400000	1381000000	1605500000	0.948	1.109	0.942	1.063	0.896	1.042	1.153	5.22E-03
O00442	RNA 3'-terminal phosphate cyclase	RTCA	7.1	39.336	7.191	13	2	2	2	2	2	3	2	2	2	2	2	2	2	2	2	2	2	2	2	2	119660000	163740000	106720000	132100000	111370000	142090000	0.926	1.267	0.825	1.022	0.861	1.099	1.297	2.95E-02
O00443	Phosphatidylinositol 4-phosphate 3-kinase C2 domain-containing subunit alpha	PIK3C2A	8.4	190.68	42.173	43	12	12	9	5	8	5	8	8	9	8	10	9	11	10	9	8	10	9	11	10	229080000	163530000	220230000	167130000	219140000	173090000	1.173	0.837	1.127	0.855	1.122	0.886	0.754	1.99E-04
O00461	Golgi integral membrane protein 4	GOLIM4	24.4	81.879	104.68	38	12	12	3	8	8	5	9	5	10	11	11	12	11	10	10	11	11	12	11	10	481590000	379990000	482150000	426140000	544660000	430550000	1.053	0.831	1.054	0.931	1.19	0.941	0.82	2.67E-02
O00468	Agrin	AGRN	19.1	217.23	128.37	92	24	24	17	22	12	14	13	14	18	21	20	18	19	21	18	21	20	18	19	21	546450000	565880000	580590000	562370000	503090000	532180000	0.996	1.032	1.059	1.025	0.917	0.97	1.019	7.05E-01
O00469	Procollagen-lysine,2-oxoglutarate 5-dioxygenase 2	PLOD2	15.5	84.685	15.831	36	10	10	7	5	8	5	5	6	8	6	9	10	8	9	8	6	9	10	8	9	192370000	159200000	187340000	161110000	199010000	162430000	1.087	0.9	1.059	0.911	1.125	0.918	0.834	8.01E-04
O00471	Exocyst complex component 5	EXOC5	13.1	81.852	23.64	18	7	7	2	3	4	3	4	2	4	3	6	4	4	5	4	3	6	4	4	5	92168000	103470000	81107000	66230000	100550000	111980000	0.996	1.118	0.876	0.715	1.086	1.209	1.029	8.71E-01
O00483	Cytochrome c oxidase subunit NDUFA4	NDUFA4	37	9.3697	10.312	26	3	3	4	4	4	4	4	6	3	3	3	3	3	3	3	3	3	3	3	3	1144400000	1053100000	1118200000	994580000	1284500000	877920000	1.061	0.976	1.037	0.922	1.191	0.814	0.825	4.68E-02
O00487	26S proteasome non-ATPase regulatory subunit 14	PSMD14	52.6	34.577	40.357	62	11	11	12	11	10	10	10	9	10	11	10	10	10	11	10	11	10	10	10	11	989070000	920780000	906840000	1011500000	928300000	1076300000	1.017	0.947	0.933	1.04	0.955	1.107	1.065	2.98E-01
O00505	Importin subunit alpha-4	KPNA3	34.5	57.81	70.22	51	11	8	10	7	9	8	9	8	10	9	11	10	10	10	7	6	8	7	7	7	849880000	869050000	954050000	921400000	847340000	813090000	0.97	0.992	1.089	1.052	0.968	0.928	0.982	7.52E-01
O00515	Ladinin-1	LAD1	37.3	57.13	175.09	120	20	20	17	24	14	18	20	27	18	18	17	17	19	19	18	18	17	17	19	19	1107500000	1242600000	1085500000	1282800000	983260000	1429300000	0.932	1.046	0.913	1.079	0.827	1.203	1.245	1.92E-02
O00541	Pescadillo homolog	PES1	46.6	68.002	77.478	146	22	22	23	22	24	25	28	24	17	18	17	20	22	19	17	18	17	20	22	19	1846100000	1679000000	1774700000	1640400000	1943200000	1663000000	1.05	0.955	1.01	0.933	1.106	0.946	0.895	1.80E-02
O00560	Syntenin-1	SDCBP	22.8	32.444	21.42	22	5	5	3	5	3	4	4	3	5	5	5	5	5	4	5	5	5	5	5	4	88256000	124270000	100420000	130770000	112820000	118540000	0.784	1.104	0.893	1.162	1.003	1.054	1.239	3.87E-02
O00566	U3 small nucleolar ribonucleoprotein protein MPP10	MPHOSPH10	29.4	78.863	153.97	121	18	18	22	19	24	18	21	17	18	17	18	17	17	18	18	17	18	17	17	18	1311000000	985550000	1262500000	1026200000	1252500000	1067900000	1.139	0.856	1.097	0.892	1.088	0.928	0.805	1.14E-03
O00567	Nucleolar protein 56	NOP56	64.8	66.049	165.95	231	30	30	41	33	42	36	42	37	29	27	29	28	29	28	29	27	29	28	29	28	5532700000	4795400000	5211900000	4607400000	5388300000	4759300000	1.096	0.95	1.032	0.913	1.067	0.943	0.878	3.84E-03
O00571	ATP-dependent RNA helicase DDX3X	DDX3X	63	73.243	255.61	322	38	37	51	55	48	59	51	58	37	36	35	37	38	36	36	35	34	36	37	35	6304800000	6255900000	6456400000	6554100000	6225500000	6390600000	0.991	0.983	1.014	1.03	0.978	1.004	1.011	5.51E-01
O00622	Protein CYR61	CYR61	54.9	42.026	61.392	108	17	17	18	20	17	16	20	17	16	16	16	16	17	16	16	16	16	16	17	16	1568800000	1220800000	1452800000	1282500000	1562700000	1182300000	1.138	0.886	1.054	0.93	1.134	0.858	0.804	3.28E-03
O00629	Importin subunit alpha-3	KPNA4	40.5	57.886	138.39	100	12	9	16	16	15	19	15	19	11	11	11	11	11	12	8	8	8	8	8	9	1417800000	1710400000	1448500000	1629100000	1425700000	1559100000	0.926	1.117	0.946	1.064	0.931	1.018	1.141	1.06E-02
O00712	Nuclear factor 1 B-type	NFIB	12.6	47.441	8.7769	13	4	3	3	2	3	1	2	2	4	3	4	4	4	4	3	2	3	3	3	3	75565000	47624000	55225000	52647000	61155000	60473000	1.286	0.81	0.939	0.896	1.04	1.029	0.837	2.17E-01
O00743	Serine/threonine-protein phosphatase 6 catalytic subunit	PPP6C	37.4	35.144	65.009	48	8	8	9	8	7	10	7	7	7	6	7	6	6	6	7	6	7	6	6	6	303760000	399540000	306720000	364550000	284010000	337770000	0.913	1.201	0.922	1.096	0.854	1.015	1.232	2.30E-02
O00754	Lysosomal alpha-mannosidase	MAN2B1	12.3	113.74	43.825	21	9	9	3	3	2	5	4	4	9	6	7	7	7	7	9	6	7	7	7	7	181300000	138580000	159140000	161180000	196870000	161990000	1.089	0.832	0.956	0.968	1.182	0.973	0.859	1.33E-01
O00762	Ubiquitin-conjugating enzyme E2 C	UBE2C	35.2	19.652	16.77	21	4	4	3	4	3	3	4	4	3	4	3	3	4	4	3	4	3	3	4	4	123160000	148230000	112560000	176640000	137420000	167700000	0.854	1.027	0.78	1.224	0.952	1.162	1.32	2.27E-02
O00764	Pyridoxal kinase	PDXK	31.4	35.102	35.385	33	8	8	5	7	5	5	5	6	6	7	8	6	6	6	6	7	8	6	6	6	275440000	303560000	244580000	335810000	285780000	389460000	0.901	0.993	0.8	1.098	0.935	1.274	1.277	5.64E-02
O14493	Claudin-4	CLDN4	12.9	22.077	20.693	18	2	2	3	3	3	3	3	3	2	2	2	2	2	2	2	2	2	2	2	2	501570000	588450000	555020000	629340000	499820000	587590000	0.895	1.05	0.991	1.123	0.892	1.049	1.16	2.18E-02
O14497	AT-rich interactive domain-containing protein 1A	ARID1A	22.6	242.04	165.04	145	34	33	24	23	32	19	29	18	27	29	31	25	28	23	26	28	30	24	27	22	806420000	690000000	770770000	678080000	818250000	667330000	1.092	0.934	1.044	0.918	1.108	0.904	0.85	1.58E-03
O14519	Cyclin-dependent kinase 2-associated protein 1	CDK2AP1	20	12.365	6.4223	12	2	2	2	2	2	2	2	2	2	2	2	2	2	2	2	2	2	2	2	2	133110000	125790000	164570000	118610000	152320000	130570000	0.968	0.915	1.197	0.863	1.108	0.95	0.833	6.30E-02
O14521	Succinate dehydrogenase [ubiquinone] cytochrome b small subunit, mitochondrial	SDHD	6.3	17.043	4.9011	7	1	1	2	0	2	1	2	0	1	1	1	1	1	1	1	1	1	1	1	1	293090000	199620000	301350000	203660000	302300000	0	1.127	0.768	1.159	0.783	1.163		0.675	1.60E-04
O14523	C2 domain-containing protein 2-like	C2CD2L	13.5	76.18	41.396	13	5	5	1	3	3	2	2	2	5	5	5	4	4	4	5	5	5	4	4	4	61768000	85012000	73766000	85581000	41454000	69538000	0.888	1.223	1.061	1.231	0.596	1	1.357	1.23E-01
O14524	Nuclear envelope integral membrane protein 1	NEMP1	4.5	50.639	3.9053	9	2	2	2	1	1	2	1	2	2	1	2	2	2	2	2	1	2	2	2	2	64822000	0	76696000	62479000	51403000	71328000	0.992		1.174	0.956	0.787	1.092	1.04	8.12E-01
O14530	Thioredoxin domain-containing protein 9	TXNDC9	16.8	26.534	13.98	9	4	4	2	2	0	1	2	2	4	3	4	4	4	4	4	3	4	4	4	4	85655000	106010000	77963000	103670000	92371000	98604000	0.911	1.127	0.829	1.102	0.982	1.048	1.204	2.07E-02
O14548	Cytochrome c oxidase subunit 7A-related protein, mitochondrial	COX7A2L	69.3	12.615	12.62	33	6	6	7	4	6	5	7	4	6	5	6	4	6	5	6	5	6	4	6	5	729720000	538450000	752360000	528040000	717720000	612170000	1.129	0.833	1.164	0.817	1.11	0.947	0.763	3.60E-03
O14561	Acyl carrier protein, mitochondrial	NDUFAB1	21.2	17.417	13.47	46	4	4	9	7	8	7	8	7	3	3	4	3	3	3	3	3	4	3	3	3	1976300000	2198000000	2106600000	1867000000	2013500000	1972300000	0.977	1.087	1.042	0.923	0.996	0.975	0.99	8.60E-01
O14578	Citron Rho-interacting kinase	CIT	12.2	231.43	36.881	49	22	22	9	4	11	7	13	5	14	12	16	16	18	13	14	12	16	16	18	13	316260000	240400000	305960000	269090000	294900000	255040000	1.128	0.858	1.092	0.96	1.052	0.91	0.834	7.90E-03
O14579	Coatomer subunit epsilon	COPE	61.4	34.482	110.41	105	11	11	16	18	14	19	18	20	10	11	11	11	11	11	10	11	11	11	11	11	1213100000	1568300000	1082700000	1370800000	1151400000	1515300000	0.921	1.191	0.822	1.041	0.874	1.151	1.292	8.68E-03
O14617	AP-3 complex subunit delta-1	AP3D1	23.9	130.16	72.486	84	22	22	14	12	11	17	13	17	19	21	19	19	21	22	19	21	19	19	21	22	816610000	850050000	806650000	811470000	811770000	864230000	0.988	1.028	0.976	0.981	0.982	1.045	1.037	1.32E-01
O14639	Actin-binding LIM protein 1	ABLIM1	21.1	87.687	55.77	51	12	12	7	10	4	11	9	10	10	11	9	11	10	10	10	11	9	11	10	10	332550000	467730000	353540000	409830000	348330000	499920000	0.827	1.164	0.879	1.02	0.867	1.244	1.332	1.35E-02
O14641	Segment polarity protein dishevelled homolog DVL-2	DVL2	6	78.947	9.559	5	4	3	0	2	0	1	1	1	2	3	4	3	3	3	1	3	3	3	2	2	0	41333000	47406000	44194000	43312000	49401000		0.916	1.05	0.979	0.96	1.095	0.992	9.18E-01
O14646	Chromodomain-helicase-DNA-binding protein 1	CHD1	4.3	196.69	12.071	8	4	2	1	2	1	2	1	1	4	3	3	4	4	4	2	1	1	2	2	2	36816000	0	0	31617000	40579000	40685000	0.984			0.845	1.084	1.087	0.934	6.56E-01
O14647	Chromodomain-helicase-DNA-binding protein 2	CHD2	4.6	211.34	28.357	17	5	3	2	3	2	3	3	4	5	4	5	5	5	4	3	2	3	3	3	2	68093000	77488000	58216000	93782000	70500000	105180000	0.863	0.982	0.738	1.189	0.894	1.333	1.405	4.02E-02
O14653	Golgi SNAP receptor complex member 2	GOSR2	49.5	24.775	75.239	63	7	7	14	7	13	8	12	9	7	7	7	7	6	6	7	7	7	7	6	6	563800000	509080000	517520000	601030000	578300000	727250000	0.967	0.873	0.888	1.031	0.992	1.248	1.107	4.19E-01
O14656	Torsin-1A	TOR1A	36.1	37.808	31.07	53	11	11	10	9	10	8	9	7	9	10	10	9	9	9	9	10	10	9	9	9	357160000	321160000	311710000	316740000	361370000	328130000	1.073	0.965	0.937	0.952	1.086	0.986	0.938	2.58E-01
O14657	Torsin-1B	TOR1B	27.7	37.978	21.536	51	8	8	9	9	9	9	6	9	8	8	8	8	8	8	8	8	8	8	8	8	404520000	357050000	394010000	403470000	480450000	402620000	0.994	0.877	0.968	0.991	1.18	0.989	0.909	2.84E-01
O14662	Syntaxin-16	STX16	46.5	37.031	108.83	40	10	10	7	6	9	7	6	5	9	8	9	8	8	9	9	8	9	8	8	9	563450000	510470000	591440000	525540000	675960000	474950000	1.012	0.917	1.062	0.944	1.214	0.853	0.825	4.49E-02
O14672	Disintegrin and metalloproteinase domain-containing protein 10	ADAM10	50.9	84.141	202.79	171	26	26	28	30	29	26	30	28	25	24	24	24	24	24	25	24	24	24	24	24	1813800000	1472800000	1885400000	1531800000	1881400000	1607600000	1.068	0.867	1.11	0.902	1.107	0.946	0.826	2.06E-03
O14681	Etoposide-induced protein 2.4 homolog	EI24	15.6	38.964	16.438	41	5	5	6	6	7	6	8	8	5	5	5	5	5	5	5	5	5	5	5	5	323060000	317220000	344100000	313620000	401620000	344360000	0.948	0.931	1.01	0.921	1.179	1.011	0.912	2.87E-01
O14735	CDP-diacylglycerol--inositol 3-phosphatidyltransferase	CDIPT	16	23.539	8.6862	15	3	3	1	2	3	3	3	3	3	3	3	3	3	3	3	3	3	3	3	3	138190000	127660000	129790000	122630000	125780000	123590000	1.08	0.998	1.014	0.958	0.983	0.966	0.95	1.70E-01
O14737	Programmed cell death protein 5	PDCD5	40.8	14.285	38.502	27	5	5	4	5	3	3	6	6	4	5	4	4	5	5	4	5	4	4	5	5	339900000	387010000	328280000	381440000	317350000	434350000	0.932	1.061	0.9	1.046	0.87	1.191	1.22	1.58E-02
O14744	Protein arginine N-methyltransferase 5	PRMT5	46.8	72.683	134.91	138	20	20	21	23	22	25	24	23	19	20	19	19	18	19	19	20	19	19	18	19	1129700000	1455900000	1172300000	1516700000	1311100000	1522300000	0.836	1.077	0.868	1.122	0.97	1.127	1.244	7.48E-03
O14745	Na(+)/H(+) exchange regulatory cofactor NHE-RF1	SLC9A3R1	34.1	38.868	42.323	52	10	10	10	10	7	9	8	8	9	9	9	8	9	8	9	9	9	8	9	8	409440000	455060000	374830000	488570000	415350000	475250000	0.938	1.043	0.859	1.12	0.952	1.089	1.183	1.02E-02
O14763	Tumor necrosis factor receptor superfamily member 10B	TNFRSF10B	20.5	47.878	37.249	13	6	6	4	2	2	0	3	2	5	2	5	4	3	4	5	2	5	4	3	4	64017000	57743000	66321000	56444000	62071000	43655000	1.097	0.989	1.136	0.967	1.063	0.748	0.82	6.88E-02
O14773	Tripeptidyl-peptidase 1	TPP1	21.5	61.247	25.653	25	6	6	5	4	4	3	5	4	6	5	5	4	5	5	6	5	5	4	5	5	245350000	214560000	313150000	297100000	270470000	259700000	0.92	0.804	1.174	1.114	1.014	0.974	0.931	5.69E-01
O14776	Transcription elongation regulator 1	TCERG1	25.7	123.9	87.052	192	28	28	31	32	32	34	29	34	27	27	27	26	28	27	27	27	27	26	28	27	2191900000	2304400000	2380900000	2176500000	2276700000	2243200000	0.969	1.019	1.052	0.962	1.006	0.992	0.982	5.61E-01
O14777	Kinetochore protein NDC80 homolog	NDC80	21.2	73.912	30.435	48	13	13	9	8	9	6	9	7	10	11	10	10	11	10	10	11	10	10	11	10	735300000	789580000	701130000	757120000	697500000	767070000	0.992	1.065	0.946	1.021	0.941	1.035	1.084	1.77E-02
O14787	Transportin-2	TNPO2	17.8	101.39	70.878	31	10	6	5	6	6	5	5	4	8	8	9	9	8	8	5	5	5	6	5	5	203230000	201550000	171060000	211900000	139680000	224910000	1.058	1.049	0.891	1.103	0.727	1.171	1.242	1.01E-01
O14802	DNA-directed RNA polymerase III subunit RPC1	POLR3A	7.8	155.64	26.191	16	7	7	4	2	2	2	3	3	5	5	3	2	3	3	5	5	3	2	3	3	85715000	114920000	89520000	113410000	72537000	78764000	0.927	1.243	0.968	1.226	0.784	0.852	1.239	2.00E-01
O14817	Tetraspanin-4	TSPAN4	26.5	26.118	10.577	16	4	4	2	4	2	2	2	4	3	4	4	4	4	4	3	4	4	4	4	4	203760000	183230000	166430000	209550000	159810000	176190000	1.112	1	0.909	1.144	0.873	0.962	1.074	4.88E-01
O14818	Proteasome subunit alpha type-7	PSMA7	62.5	27.887	64.049	98	12	12	16	17	15	19	14	17	11	9	11	10	11	10	11	9	11	10	11	10	2319100000	2366800000	2337700000	2324300000	2300000000	2565900000	0.979	0.999	0.987	0.981	0.971	1.083	1.043	3.15E-01
O14828	Secretory carrier-associated membrane protein 3	SCAMP3	42.7	38.287	128.04	71	10	10	13	12	13	10	13	10	10	9	10	9	9	8	10	9	10	9	9	8	1285800000	996140000	1361100000	1061500000	1321400000	1084900000	1.085	0.841	1.148	0.896	1.115	0.915	0.792	1.32E-03
O14874	[3-methyl-2-oxobutanoate dehydrogenase [lipoamide]] kinase, mitochondrial	BCKDK	20.9	46.36	55.64	37	7	7	8	5	7	5	7	5	6	6	7	4	4	7	6	6	7	4	4	7	218940000	201180000	223140000	166100000	241830000	222270000	1.032	0.948	1.051	0.783	1.139	1.047	0.862	1.52E-01
O14880	Microsomal glutathione S-transferase 3	MGST3	37.5	16.516	17.915	23	4	4	4	4	4	4	4	3	3	4	4	3	4	3	3	4	4	3	4	3	226200000	197350000	267610000	245160000	236430000	231270000	0.967	0.843	1.144	1.048	1.01	0.988	0.923	3.75E-01
O14893	Gem-associated protein 2	GEMIN2	16.4	31.585	6.766	12	4	4	1	2	1	2	2	4	2	2	2	3	3	4	2	2	2	3	3	4	87130000	113750000	76245000	96388000	72541000	128970000	0.909	1.187	0.796	1.006	0.757	1.346	1.437	2.96E-02
O14896	Interferon regulatory factor 6	IRF6	5.4	53.129	2.006	4	3	3	1	1	1	0	0	1	2	3	3	3	3	2	2	3	3	3	3	2	68442000	50195000	67001000	0	0	59953000	1.115	0.818	1.091			0.976	0.813	1.24E-01
O14907	Tax1-binding protein 3	TAX1BP3	39.5	13.735	15.129	23	3	3	3	4	3	4	3	6	2	2	2	2	2	3	2	2	2	2	2	3	318500000	355450000	303940000	458120000	335550000	370310000	0.892	0.996	0.851	1.283	0.94	1.037	1.236	8.66E-02
O14908	PDZ domain-containing protein GIPC1	GIPC1	44.7	36.049	58.331	62	12	12	9	11	9	10	10	13	9	10	10	9	10	12	9	10	10	9	10	12	615080000	655180000	627070000	662940000	597120000	635180000	0.973	1.037	0.992	1.049	0.945	1.005	1.062	3.40E-02
O14925	Mitochondrial import inner membrane translocase subunit Tim23	TIMM23	51.2	21.943	18.237	30	7	7	5	3	6	6	3	7	5	5	6	6	6	7	5	5	6	6	6	7	521880000	400460000	496490000	376670000	503440000	390940000	1.164	0.893	1.107	0.84	1.123	0.872	0.768	3.23E-04
O14929	Histone acetyltransferase type B catalytic subunit	HAT1	25.3	49.512	44.149	46	7	7	5	7	7	9	7	11	6	6	7	7	7	7	6	6	7	7	7	7	580340000	577030000	655880000	674150000	613710000	676290000	0.922	0.917	1.042	1.071	0.975	1.074	1.042	5.47E-01
O14936	Peripheral plasma membrane protein CASK	CASK	35.7	105.12	99.887	157	27	27	29	25	29	24	27	23	26	24	26	24	25	21	26	24	26	24	25	21	1379200000	1136100000	1428400000	1167600000	1446300000	1195200000	1.067	0.879	1.105	0.904	1.119	0.925	0.823	6.75E-04
O14939	Phospholipase D2	PLD2	7.6	105.99	18.891	12	5	5	3	3	3	1	0	2	5	3	3	4	2	2	5	3	3	4	2	2	61146000	65318000	49759000	48680000	52847000	0	1.101	1.176	0.896	0.876	0.951		1.044	7.71E-01
O14949	Cytochrome b-c1 complex subunit 8	UQCRQ	46.3	9.9062	13.986	23	4	4	3	4	3	4	4	5	3	4	4	4	4	4	3	4	4	4	4	4	651540000	623660000	703600000	518990000	812850000	579470000	1.005	0.962	1.085	0.8	1.254	0.894	0.794	5.78E-02
O14964	Hepatocyte growth factor-regulated tyrosine kinase substrate	HGS	25	86.191	76.235	73	15	15	12	13	12	11	14	11	13	15	15	15	14	14	13	15	15	15	14	14	889920000	846590000	918750000	843610000	914030000	904120000	1.004	0.955	1.037	0.952	1.031	1.02	0.953	1.19E-01
O14965	Aurora kinase A	AURKA	14.1	45.809	6.3858	10	4	4	1	3	1	2	2	1	2	3	3	2	4	4	2	3	3	2	4	4	42298000	39836000	50694000	0	61092000	46453000	0.88	0.829	1.054		1.271	0.966	0.84	3.50E-01
O14966	Ras-related protein Rab-7L1	RAB29	24.6	23.155	4.8038	6	4	3	3	0	2	0	1	0	4	2	3	3	4	2	3	1	2	2	3	1	67502000	0	56301000	33689000	59727000	0	1.243		1.037	0.62	1.1		0.551
O14974	Protein phosphatase 1 regulatory subunit 12A	PPP1R12A	27.9	115.28	123.55	112	22	22	18	18	19	17	19	21	20	18	19	17	18	20	20	18	19	17	18	20	770880000	689020000	802090000	696680000	810630000	644880000	1.048	0.937	1.09	0.947	1.102	0.877	0.852	4.30E-03
O14979	Heterogeneous nuclear ribonucleoprotein D-like	HNRNPDL	32.9	46.437	75.847	122	14	13	22	22	23	21	16	18	13	13	14	12	14	13	12	12	13	11	13	12	4899800000	4795000000	4680500000	5585500000	5008000000	4927600000	0.983	0.962	0.939	1.121	1.005	0.989	1.049	4.13E-01
O14980	Exportin-1	XPO1	48.7	123.38	230.65	279	39	39	43	48	44	45	49	50	37	38	38	37	38	38	37	38	38	37	38	38	3768000000	4250000000	4021400000	4431500000	3694000000	4211000000	0.927	1.046	0.99	1.091	0.909	1.037	1.123	1.74E-02
O15013	Rho guanine nucleotide exchange factor 10	ARHGEF10	4.6	151.61	35.329	14	4	4	2	1	2	4	3	2	3	3	4	3	3	4	3	3	4	3	3	4	17197000	29336000	20630000	27695000	24252000	32954000	0.679	1.158	0.814	1.093	0.957	1.3	1.45	2.21E-02
O15014	Zinc finger protein 609	ZNF609	8.7	151.19	35.031	8	6	6	0	3	1	1	2	1	4	5	3	6	6	5	4	5	3	6	6	5	463960000	451780000	536390000	549370000	514460000	421570000	0.948	0.923	1.096	1.122	1.051	0.861	0.939	5.25E-01
O15020	Spectrin beta chain, non-erythrocytic 2	SPTBN2	19.9	271.32	146.34	85	38	28	18	13	13	14	14	13	35	33	33	31	30	33	25	23	23	21	20	23	652810000	639150000	634540000	574220000	635500000	567270000	1.058	1.035	1.028	0.93	1.03	0.919	0.926	1.16E-01
O15027	Protein transport protein Sec16A	SEC16A	27.9	233.51	204.03	115	32	32	19	21	20	20	19	16	25	25	27	24	26	23	25	25	27	24	26	23	726800000	812150000	672710000	836380000	808240000	845570000	0.927	1.036	0.858	1.067	1.031	1.079	1.13	7.86E-02
O15031	Plexin-B2	PLXNB2	20.1	205.12	211.3	123	23	23	21	18	22	20	26	16	19	18	22	18	22	20	19	18	22	18	22	20	809480000	713220000	894200000	718100000	907640000	705050000	1.023	0.901	1.13	0.908	1.147	0.891	0.818	3.62E-02
O15042	U2 snRNP-associated SURP motif-containing protein	U2SURP	33	118.29	247.43	203	27	27	38	31	33	31	40	30	26	22	23	26	25	26	26	22	23	26	25	26	2895900000	2806300000	3081400000	2974800000	3031900000	2988100000	0.977	0.947	1.04	1.004	1.023	1.008	0.973	3.77E-01
O15066	Kinesin-like protein KIF3B	KIF3B	10.6	85.124	12.37	17	7	7	4	3	4	2	2	2	6	5	6	4	4	5	6	5	6	4	4	5	67565000	64989000	62628000	52230000	57198000	53854000	1.131	1.088	1.048	0.874	0.957	0.901	0.913	3.38E-01
O15067	Phosphoribosylformylglycinamidine synthase	PFAS	29.3	144.73	123.77	94	24	24	14	16	14	19	18	13	20	21	17	21	22	21	20	21	17	21	22	21	856740000	834730000	867970000	910400000	882770000	986440000	0.963	0.938	0.975	1.023	0.992	1.109	1.048	4.05E-01
O15084	Serine/threonine-protein phosphatase 6 regulatory ankyrin repeat subunit A	ANKRD28	16.3	112.96	73.761	41	10	10	5	4	8	8	9	7	8	7	10	7	8	7	8	7	10	7	8	7	187520000	213340000	172310000	175460000	176810000	196870000	1.003	1.141	0.921	0.938	0.945	1.052	1.091	2.40E-01
O15091	Mitochondrial ribonuclease P protein 3	KIAA0391	39.6	67.315	114.58	99	18	18	18	18	16	16	14	17	16	15	17	17	15	15	16	15	17	17	15	15	834000000	826660000	793340000	787620000	846780000	882520000	1.007	0.998	0.958	0.951	1.022	1.065	1.009	8.24E-01
O15111	Inhibitor of nuclear factor kappa-B kinase subunit alpha	CHUK	14.2	84.639	15.191	17	7	7	2	1	3	3	3	5	4	2	3	3	3	6	4	2	3	3	3	6	73737000	73285000	82463000	76597000	72753000	87491000	0.949	0.943	1.061	0.986	0.936	1.126	1.037	6.24E-01
O15116	U6 snRNA-associated Sm-like protein LSm1	LSM1	19.5	15.179	20.506	11	2	2	1	3	1	3	1	2	2	2	2	2	2	2	2	2	2	2	2	2	12235000	34209000	15149000	53400000	10752000	19345000	0.506	1.415	0.626	2.208	0.445	0.8	2.805	1.47E-01
O15118	Niemann-Pick C1 protein	NPC1	10.2	142.17	30.398	20	8	8	1	2	4	4	4	5	5	5	5	5	5	7	5	5	5	5	5	7	165740000	154190000	148040000	151120000	164030000	168280000	1.045	0.972	0.934	0.953	1.034	1.061	0.991	8.64E-01
O15121	Sphingolipid delta(4)-desaturase DES1	DEGS1	9.9	37.866	5.6027	6	2	2	0	2	1	0	2	1	2	2	1	1	2	2	2	2	1	1	2	2	0	73848000	57941000	0	36205000	44593000		1.39	1.09		0.681	0.839	1.258	5.74E-01
O15126	Secretory carrier-associated membrane protein 1	SCAMP1	37.3	37.92	60.041	65	8	8	11	11	11	10	12	10	8	8	8	8	8	8	8	8	8	8	8	8	763150000	676640000	801870000	620750000	770570000	700020000	1.057	0.937	1.11	0.86	1.067	0.969	0.855	1.29E-02
O15127	Secretory carrier-associated membrane protein 2	SCAMP2	13.7	36.648	23.917	22	3	3	4	4	3	4	4	3	3	3	3	3	3	2	3	3	3	3	3	2	371140000	333580000	379440000	357680000	411520000	317960000	1.026	0.922	1.049	0.988	1.137	0.879	0.868	3.92E-02
O15143	Actin-related protein 2/3 complex subunit 1B	ARPC1B	61.3	40.949	190.26	179	19	18	28	34	28	30	30	29	19	18	18	18	19	18	18	17	17	17	18	17	5932700000	5295600000	6051700000	5322600000	6430200000	5541400000	1.03	0.919	1.05	0.924	1.116	0.962	0.878	1.13E-02
O15144	Actin-related protein 2/3 complex subunit 2	ARPC2	68.3	34.333	47.154	128	16	16	22	22	18	20	23	23	15	15	14	15	16	16	15	15	14	15	16	16	4235600000	3977200000	4745900000	3749600000	4276200000	3678200000	1.03	0.968	1.155	0.912	1.04	0.895	0.86	2.98E-02
O15145	Actin-related protein 2/3 complex subunit 3	ARPC3	49.4	20.546	40.174	58	7	7	6	11	10	9	11	11	4	7	7	6	7	7	4	7	7	6	7	7	1437800000	1563200000	1730400000	1652800000	1548000000	1626500000	0.903	0.981	1.086	1.037	0.972	1.021	1.027	6.62E-01
O15155	BET1 homolog	BET1	24.6	13.289	6.9689	27	2	2	4	5	4	5	5	4	2	2	2	2	2	2	2	2	2	2	2	2	253090000	299090000	277220000	316190000	323260000	304540000	0.856	1.012	0.938	1.07	1.094	1.03	1.078	3.56E-01
O15160	DNA-directed RNA polymerases I and III subunit RPAC1	POLR1C	53.5	39.249	84.719	62	13	13	10	12	10	9	13	8	11	11	10	12	11	10	11	11	10	12	11	10	849910000	708580000	780680000	803250000	790960000	741270000	1.091	0.909	1.002	1.031	1.015	0.951	0.93	1.85E-01
O15162	Phospholipid scramblase 1	PLSCR1	26.1	35.049	30.589	35	6	6	6	4	7	5	8	5	6	5	6	5	6	6	6	5	6	5	6	6	208600000	201960000	195740000	225770000	204050000	179050000	1.03	0.997	0.966	1.115	1.008	0.884	0.997	9.71E-01
O15164	Transcription intermediary factor 1-alpha	TRIM24	8.4	116.83	18.175	15	7	6	1	3	1	2	3	5	5	6	6	7	6	6	5	5	5	6	5	6	68655000	98484000	67441000	95426000	93012000	99803000	0.788	1.13	0.774	1.095	1.067	1.145	1.282	1.25E-01
O15173	Membrane-associated progesterone receptor component 2	PGRMC2	39	23.818	45.707	62	8	7	8	10	11	11	11	11	6	8	8	7	7	8	5	7	7	6	6	7	1533500000	1430600000	1577100000	1439900000	1729900000	1470700000	1.002	0.935	1.031	0.941	1.13	0.961	0.897	5.20E-02
O15182	Centrin-3	CETN3	27.5	19.55	18.043	14	3	3	2	3	2	2	3	2	1	2	2	2	2	2	1	2	2	2	2	2	109250000	157260000	104590000	101280000	74526000	124980000	0.976	1.404	0.934	0.904	0.666	1.116	1.33	1.80E-01
O15194	CTD small phosphatase-like protein	CTDSPL	13.8	31.128	12.62	21	4	2	4	4	2	3	4	4	4	4	4	4	4	3	2	2	2	2	2	2	182290000	157610000	187670000	186560000	189080000	179390000	1.01	0.874	1.04	1.034	1.048	0.994	0.937	2.57E-01
O15212	Prefoldin subunit 6	PFDN6	50.4	14.582	95.212	56	8	8	9	9	9	10	10	9	7	7	7	7	8	6	7	7	7	7	8	6	843230000	947460000	844090000	879600000	876470000	805200000	0.974	1.094	0.975	1.016	1.012	0.93	1.027	6.20E-01
O15213	WD repeat-containing protein 46	WDR46	32.6	68.07	125.37	111	17	17	21	18	18	17	19	18	16	15	16	14	14	14	16	15	16	14	14	14	873540000	729880000	824760000	660870000	873180000	699630000	1.124	0.939	1.061	0.851	1.124	0.9	0.813	3.36E-03
O15226	NF-kappa-B-repressing factor	NKRF	38.4	77.672	150.35	138	24	24	25	24	22	24	23	20	23	22	23	21	22	22	23	22	23	21	22	22	1492300000	1393500000	1488600000	1398400000	1545400000	1455600000	1.021	0.953	1.018	0.956	1.057	0.995	0.938	2.65E-02
O15228	Dihydroxyacetone phosphate acyltransferase	GNPAT	22.2	77.187	41.099	41	11	11	6	7	7	9	8	4	8	10	10	9	9	8	8	10	10	9	9	8	232770000	244160000	235730000	240840000	225460000	246550000	0.98	1.028	0.992	1.014	0.949	1.038	1.054	2.26E-02
O15230	Laminin subunit alpha-5	LAMA5	9.5	399.73	131.32	71	23	22	14	10	15	10	11	11	18	16	19	18	15	18	18	15	18	17	15	17	348440000	316070000	330080000	308390000	307810000	292750000	1.098	0.996	1.04	0.972	0.97	0.923	0.93	1.66E-01
O15231	Zinc finger protein 185	ZNF185	44.4	73.525	202.35	90	20	20	12	16	16	16	14	16	17	19	17	18	17	18	17	19	17	18	17	18	670180000	798230000	622610000	851000000	652670000	793710000	0.916	1.091	0.851	1.164	0.892	1.085	1.256	1.98E-03
O15234	Protein CASC3	CASC3	11.1	76.277	17.55	6	6	6	2	1	1	0	0	2	3	4	2	2	3	2	3	4	2	2	3	2	0	0	0	0	26039000	20130000					1.128	0.872	0.773
O15235	28S ribosomal protein S12, mitochondrial	MRPS12	33.3	15.173	28.697	32	4	4	5	4	4	6	6	7	4	3	4	4	4	4	4	3	4	4	4	4	512730000	412580000	636520000	326740000	645330000	451980000	1.03	0.829	1.279	0.657	1.297	0.908	0.664	2.37E-02
O15258	Protein RER1	RER1	28.6	22.958	103.93	63	5	5	10	12	10	9	11	11	4	5	4	4	4	5	4	5	4	4	4	5	1128700000	1090400000	1367200000	1047900000	1339600000	1210200000	0.943	0.911	1.142	0.875	1.119	1.011	0.873	1.44E-01
O15260	Surfeit locus protein 4	SURF4	30.5	30.394	48.323	103	7	7	17	16	17	17	18	18	7	7	7	7	7	7	7	7	7	7	7	7	1944200000	1576600000	1930100000	1840600000	1815600000	1738300000	1.076	0.872	1.068	1.018	1.004	0.962	0.906	1.10E-01
O15269	Serine palmitoyltransferase 1	SPTLC1	52	52.743	135.52	128	18	18	21	23	20	22	19	23	16	18	18	18	17	18	16	18	18	18	17	18	1789900000	1716100000	1831900000	1863300000	1691700000	1745300000	1.01	0.968	1.033	1.051	0.954	0.984	1.002	9.54E-01
O15270	Serine palmitoyltransferase 2	SPTLC2	47.2	62.924	96.735	107	19	19	20	20	12	19	20	16	19	18	19	18	19	18	19	18	19	18	19	18	1196100000	1122200000	1112200000	1242300000	1158600000	1172600000	1.025	0.961	0.953	1.064	0.993	1.005	1.02	6.11E-01
O15294	UDP-N-acetylglucosamine--peptide N-acetylglucosaminyltransferase 110 kDa subunit	OGT	23.9	116.92	81.114	83	20	20	14	17	10	16	13	13	17	18	16	17	19	18	17	18	16	17	19	18	643660000	653160000	670500000	606910000	677890000	669740000	0.985	0.999	1.026	0.929	1.037	1.025	0.969	3.89E-01
O15305	Phosphomannomutase 2	PMM2	41.5	28.082	19.409	45	9	9	7	7	7	7	7	10	9	9	8	9	9	9	9	9	8	9	9	9	229510000	288490000	230200000	298250000	237710000	286210000	0.877	1.102	0.88	1.14	0.908	1.094	1.252	2.04E-04
O15318	DNA-directed RNA polymerase III subunit RPC7	POLR3G	13.9	25.914	2.5079	8	2	2	1	2	1	2	1	1	2	2	1	2	1	1	2	2	1	2	1	1	44847000	43628000	0	37621000	0	0	1.067	1.038		0.895			0.906
O15320	cTAGE family member 5	CTAGE5	34.2	90.995	129.18	116	24	24	18	16	20	19	22	21	22	20	24	22	23	23	22	20	24	22	23	23	1013900000	952780000	997270000	966230000	1148800000	929630000	1.012	0.951	0.996	0.965	1.147	0.928	0.901	1.02E-01
O15321	Transmembrane 9 superfamily member 1	TM9SF1	15.5	68.86	22.866	23	8	8	5	3	3	4	3	5	6	7	5	6	7	7	6	7	5	6	7	7	292270000	79419000	358550000	270640000	406730000	258920000	1.052	0.286	1.291	0.974	1.464	0.932	0.576	1.00E-01
O15344	E3 ubiquitin-protein ligase Midline-1	MID1	11.4	75.25	17.249	19	6	6	3	4	1	2	5	4	5	4	4	4	6	5	5	4	4	4	6	5	101570000	90947000	99989000	85632000	92968000	107160000	1.054	0.944	1.037	0.889	0.965	1.112	0.963	6.34E-01
O15347	High mobility group protein B3	HMGB3	25	22.98	11.763	24	5	5	6	4	3	4	3	4	5	5	5	5	4	4	5	5	5	5	4	4	588230000	572220000	725820000	604580000	629870000	718470000	0.919	0.894	1.134	0.945	0.984	1.123	0.975	8.01E-01
O15355	Protein phosphatase 1G	PPM1G	39.6	59.271	107.29	102	14	14	19	16	20	15	16	16	13	12	12	14	12	13	13	12	12	14	12	13	1380500000	1285400000	1402500000	1404300000	1435500000	1368100000	1.001	0.932	1.017	1.018	1.041	0.992	0.962	2.38E-01
O15371	Eukaryotic translation initiation factor 3 subunit D	EIF3D	50.7	63.972	187.41	147	18	18	25	25	22	26	21	28	16	15	16	15	14	18	16	15	16	15	14	18	2970200000	3585400000	2951300000	3749200000	2706800000	3537200000	0.914	1.103	0.908	1.154	0.833	1.088	1.26	2.16E-03
O15372	Eukaryotic translation initiation factor 3 subunit H	EIF3H	70.2	39.93	116.3	97	18	18	14	21	14	15	14	19	16	16	14	16	17	17	16	16	14	16	17	17	1488100000	1777300000	1372000000	1988400000	1578900000	1894100000	0.884	1.056	0.815	1.181	0.938	1.125	1.275	8.92E-03
O15379	Histone deacetylase 3	HDAC3	7.2	48.847	6.2477	11	3	2	2	2	2	2	2	1	3	3	3	3	3	2	2	2	2	2	2	1	29569000	26238000	26981000	28561000	0	0	1.062	0.943	0.969	1.026			0.969	6.65E-01
O15381	Nuclear valosin-containing protein-like	NVL	14.7	95.05	34.377	30	9	9	7	4	4	4	5	6	7	6	5	6	7	8	7	6	5	6	7	8	136190000	119130000	132740000	112000000	134190000	107410000	1.102	0.964	1.074	0.906	1.086	0.869	0.84	3.74E-03
O15382	Branched-chain-amino-acid aminotransferase, mitochondrial	BCAT2	55.6	44.287	176.99	162	20	20	25	27	29	29	27	25	16	18	18	18	19	19	16	18	18	18	19	19	3061400000	3273200000	3040400000	3091100000	3189400000	2980400000	0.986	1.054	0.979	0.995	1.027	0.96	1.006	8.63E-01
O15397	Importin-8	IPO8	9.2	119.94	18.887	28	8	7	5	4	6	5	4	4	8	6	8	6	7	7	7	5	7	5	6	6	159640000	140990000	179270000	152300000	173350000	134480000	1.019	0.9	1.144	0.972	1.106	0.858	0.835	2.26E-02
O15400	Syntaxin-7	STX7	42.1	29.815	102.32	40	8	8	6	9	5	6	6	8	8	8	7	8	8	8	8	8	7	8	8	8	967960000	942070000	968050000	1011000000	1015300000	854340000	1.009	0.982	1.009	1.053	1.058	0.89	0.951	3.74E-01
O15417	Trinucleotide repeat-containing gene 18 protein	TNRC18	3.1	314.52	3.2495	14	4	4	2	2	2	2	3	3	2	3	3	3	3	3	2	3	3	3	3	3	287100000	280540000	288930000	270350000	284680000	270010000	1.024	1.001	1.031	0.965	1.016	0.963	0.954	2.24E-02
O15427	Monocarboxylate transporter 4	SLC16A3	16.6	49.469	14.78	45	8	8	7	3	7	11	8	9	7	5	7	8	8	5	7	5	7	8	8	5	532030000	606970000	747210000	659230000	688470000	714500000	0.808	0.922	1.135	1.002	1.046	1.086	1.007	9.55E-01
O15431	High affinity copper uptake protein 1	SLC31A1	5.8	21.09	2.5199	11	1	1	2	2	1	2	2	2	1	1	1	1	1	1	1	1	1	1	1	1	168860000	151800000	196560000	156340000	162890000	156250000	1.021	0.917	1.188	0.945	0.985	0.944	0.879	1.79E-01
O15439	Multidrug resistance-associated protein 4	ABCC4	25.6	149.52	99.253	88	28	28	15	10	16	16	18	13	26	25	23	22	28	24	26	25	23	22	28	24	767250000	685610000	686540000	659340000	771830000	634290000	1.095	0.978	0.98	0.941	1.101	0.905	0.889	5.91E-02
O15446	DNA-directed RNA polymerase I subunit RPA34	CD3EAP	56.9	54.985	112.15	88	15	15	15	13	13	17	15	15	12	11	11	13	12	13	12	11	11	13	12	13	1049100000	954960000	947970000	931070000	1023800000	991910000	1.067	0.971	0.964	0.947	1.041	1.009	0.953	2.47E-01
O15460	Prolyl 4-hydroxylase subunit alpha-2	P4HA2	35.3	60.901	82.046	72	15	15	9	11	12	12	17	11	10	13	14	13	15	14	10	13	14	13	15	14	512880000	590650000	524070000	519450000	592610000	563730000	0.932	1.073	0.952	0.943	1.076	1.024	1.027	6.73E-01
O15498	Synaptobrevin homolog YKT6	YKT6	47.5	22.417	76.201	72	8	8	11	11	15	13	12	10	8	8	8	8	8	8	8	8	8	8	8	8	636780000	648430000	701530000	699840000	719380000	655370000	0.941	0.958	1.036	1.034	1.063	0.968	0.974	5.78E-01
O15504	Nucleoporin-like protein 2	NUPL2	11.6	44.871	6.3253	7	3	3	1	1	2	0	2	1	3	2	3	2	2	2	3	2	3	2	2	2	86308000	66042000	88951000	66155000	72537000	67321000	1.158	0.886	1.193	0.887	0.973	0.903	0.805	8.76E-02
O15511	Actin-related protein 2/3 complex subunit 5	ARPC5	43.7	16.32	61.362	52	6	6	9	8	8	9	8	10	6	5	5	6	6	6	6	5	5	6	6	6	735420000	628090000	738470000	764680000	764600000	710610000	1.016	0.868	1.02	1.057	1.057	0.982	0.94	3.31E-01
O15514	DNA-directed RNA polymerase II subunit RPB4	POLR2D	54.9	16.311	54.989	36	5	5	6	6	7	5	5	7	5	5	4	5	5	5	5	5	4	5	5	5	181380000	242200000	222520000	220170000	190690000	227650000	0.847	1.131	1.039	1.028	0.891	1.063	1.16	8.61E-02
O15533	Tapasin	TAPBP	17.6	47.625	47.563	37	6	6	5	7	6	6	7	6	6	6	6	6	6	6	6	6	6	6	6	6	368490000	324070000	389500000	298830000	388580000	304680000	1.066	0.937	1.127	0.864	1.124	0.881	0.809	2.06E-03
O15541	RING finger protein 113A	RNF113A	9.3	38.787	3.8691	7	3	3	1	2	1	2	0	1	2	2	2	2	1	2	2	2	2	2	1	2	13916000	82951000	16339000	100920000	0	0	0.26	1.55	0.305	1.885			6.077	1.36E-02
O15550	Lysine-specific demethylase 6A	KDM6A	7.6	154.17	11.594	11	7	7	1	0	1	2	3	4	7	6	6	5	7	7	7	6	6	5	7	7	107580000	82901000	73121000	67913000	104950000	91509000	1.223	0.942	0.831	0.772	1.193	1.04	0.848	3.30E-01
O43143	Pre-mRNA-splicing factor ATP-dependent RNA helicase DHX15	DHX15	58.7	90.932	151	293	36	35	45	48	46	53	51	50	31	35	33	33	33	32	30	34	32	32	32	31	5304100000	4956100000	5460900000	4984000000	5514500000	5000900000	1.019	0.952	1.049	0.958	1.06	0.961	0.918	2.28E-03
O43148	mRNA cap guanine-N7 methyltransferase	RNMT	35.1	54.843	71.988	55	12	12	7	10	10	7	11	10	11	11	10	10	11	11	11	11	10	10	11	11	939350000	1259000000	998520000	1188100000	974610000	1295600000	0.847	1.135	0.9	1.071	0.879	1.168	1.285	1.52E-03
O43156	TELO2-interacting protein 1 homolog	TTI1	11.9	122.07	44.558	37	9	9	6	5	7	7	9	3	9	6	8	7	8	6	9	6	8	7	8	6	189510000	180800000	193320000	196780000	157260000	178310000	1.037	0.99	1.058	1.077	0.861	0.976	1.029	7.02E-01
O43159	Ribosomal RNA-processing protein 8	RRP8	43.4	50.714	120.58	84	14	14	12	13	16	12	16	15	11	13	13	11	14	12	11	13	13	11	14	12	888910000	747120000	776240000	841540000	893300000	868710000	1.063	0.894	0.929	1.007	1.069	1.039	0.96	5.61E-01
O43164	E3 ubiquitin-protein ligase Praja-2	PJA2	8.6	78.213	31.28	8	3	3	2	1	1	2	1	1	2	2	2	3	2	3	2	2	2	3	2	3	32403000	32007000	32365000	31436000	0	42419000	0.95	0.938	0.948	0.921		1.243	1.09	5.01E-01
O43166	Signal-induced proliferation-associated 1-like protein 1	SIPA1L1	7.9	200.03	36.555	27	9	9	3	6	4	3	5	6	7	7	7	4	6	8	7	7	7	4	6	8	78537000	111860000	90922000	110620000	99088000	98545000	0.799	1.138	0.925	1.126	1.008	1.003	1.195	7.55E-02
O43169	Cytochrome b5 type B	CYB5B	50.7	16.332	120.97	87	4	4	15	12	14	14	18	14	4	4	4	4	4	4	4	4	4	4	4	4	5726800000	5236000000	5242700000	4963400000	4255600000	5293300000	1.119	1.023	1.024	0.969	0.831	1.034	1.018	8.51E-01
O43172	U4/U6 small nuclear ribonucleoprotein Prp4	PRPF4	51	58.449	119.54	173	23	23	29	29	26	29	31	29	22	22	22	23	23	23	22	22	22	23	23	23	2584600000	2464600000	2290600000	2394700000	2410400000	2454700000	1.062	1.013	0.941	0.984	0.991	1.009	1.004	9.20E-01
O43175	D-3-phosphoglycerate dehydrogenase	PHGDH	32.3	56.65	79.572	58	13	13	11	11	10	9	8	9	11	11	11	12	13	12	11	11	11	12	13	12	518850000	583920000	502510000	571930000	501330000	522860000	0.972	1.094	0.942	1.072	0.94	0.98	1.102	5.61E-02
O43181	NADH dehydrogenase [ubiquinone] iron-sulfur protein 4, mitochondrial	NDUFS4	25.7	20.108	11.611	24	4	4	4	5	4	4	5	2	4	4	4	4	4	4	4	4	4	4	4	4	338020000	365820000	445640000	312390000	360460000	340430000	0.938	1.015	1.236	0.867	1	0.944	0.89	3.13E-01
O43237	Cytoplasmic dynein 1 light intermediate chain 2	DYNC1LI2	35.6	54.099	30.077	45	12	11	8	6	7	7	10	7	11	9	9	9	10	9	10	8	8	8	9	8	336900000	327810000	321590000	278630000	358400000	286620000	1.058	1.03	1.01	0.875	1.126	0.9	0.878	9.08E-02
O43242	26S proteasome non-ATPase regulatory subunit 3	PSMD3	57.7	60.977	188.45	195	30	30	30	34	33	35	31	32	27	24	26	26	28	27	27	24	26	26	28	27	2763900000	2709300000	2613900000	2765100000	2700300000	2743700000	1.018	0.998	0.962	1.018	0.994	1.01	1.017	3.72E-01
O43251	RNA binding protein fox-1 homolog 2	RBFOX2	19.7	41.373	16.632	25	7	7	3	5	4	4	5	4	4	6	4	3	6	4	4	6	4	3	6	4	281740000	198870000	258600000	171110000	250720000	243650000	1.203	0.849	1.105	0.731	1.071	1.041	0.776	6.26E-02
O43252	Bifunctional 3'-phosphoadenosine 5'-phosphosulfate synthase 1	PAPSS1	17.5	70.832	28.89	29	7	7	7	4	5	2	6	5	5	4	5	4	6	6	5	4	5	4	6	6	242010000	246870000	249290000	241080000	236450000	257290000	0.986	1.006	1.015	0.982	0.963	1.048	1.024	3.88E-01
O43264	Centromere/kinetochore protein zw10 homolog	ZW10	37.5	88.828	129.59	124	19	19	24	22	19	17	22	20	17	17	15	16	17	15	17	17	15	16	17	15	1191500000	925670000	1063500000	959310000	1049500000	930770000	1.168	0.907	1.043	0.94	1.029	0.912	0.852	2.46E-02
O43278	Kunitz-type protease inhibitor 1	SPINT1	33.6	58.397	86.529	79	16	16	12	15	15	12	13	12	14	15	15	15	14	15	14	15	15	15	14	15	848120000	753300000	869650000	728470000	825820000	804640000	1.054	0.936	1.08	0.905	1.026	1	0.899	2.91E-02
O43286	Beta-1,4-galactosyltransferase 5	B4GALT5	13.4	45.118	18.386	20	4	4	3	5	3	4	2	3	4	4	4	4	4	4	4	4	4	4	4	4	90097000	151470000	73939000	129720000	92828000	113930000	0.829	1.394	0.68	1.194	0.854	1.048	1.538	2.04E-02
O43290	U4/U6.U5 tri-snRNP-associated protein 1	SART1	45.5	90.254	242.6	200	30	30	30	37	33	35	32	33	28	28	29	28	28	28	28	28	29	28	28	28	2325400000	2344200000	2340500000	2489200000	2306500000	2272400000	0.991	0.999	0.997	1.061	0.983	0.968	1.019	5.62E-01
O43291	Kunitz-type protease inhibitor 2	SPINT2	42.5	28.228	130.78	74	9	9	13	13	11	14	12	11	8	8	7	8	8	8	8	8	7	8	8	8	1184700000	1182600000	1153900000	1153000000	1033400000	1273900000	1.018	1.016	0.992	0.991	0.888	1.095	1.07	2.49E-01
O43292	Glycosylphosphatidylinositol anchor attachment 1 protein	GPAA1	12.9	67.622	16.301	28	7	7	6	5	5	4	4	4	6	6	6	5	7	5	6	6	6	5	7	5	287050000	274370000	345150000	238220000	316960000	274360000	0.992	0.948	1.193	0.823	1.095	0.948	0.829	5.89E-02
O43293	Death-associated protein kinase 3	DAPK3	6.4	52.535	6.8115	7	2	2	2	1	1	1	2	0	2	2	2	2	2	2	2	2	2	2	2	2	47614000	38636000	54075000	38515000	53688000	42947000	1.037	0.842	1.178	0.839	1.169	0.935	0.773	9.94E-03
O43295	SLIT-ROBO Rho GTPase-activating protein 3	SRGAP3	3.4	124.5	15	11	3	2	0	2	2	3	2	2	2	2	2	2	2	3	2	2	2	2	2	2	39279000	202060000	149800000	221570000	188760000	186700000	0.238	1.227	0.91	1.345	1.146	1.134	1.615	1.67E-01
O43310	CBP80/20-dependent translation initiation factor	CTIF	4.8	67.586	4.1284	3	2	2	0	1	0	1	1	0	1	1	1	2	2	1	1	1	1	2	2	1	0	0	0	18644000	10082000	0				1.298	0.702		1.849
O43318	Mitogen-activated protein kinase kinase kinase 7	MAP3K7	9.9	67.195	11.938	14	5	5	4	1	2	2	2	3	3	3	3	3	3	3	3	3	3	3	3	3	34205000	31199000	35940000	26612000	47803000	29138000	1.002	0.914	1.052	0.779	1.4	0.853	0.737	8.21E-02
O43324	Eukaryotic translation elongation factor 1 epsilon-1	EEF1E1	60.9	19.81	17.759	39	9	9	7	7	7	6	6	6	8	8	9	9	9	9	8	8	9	9	9	9	562520000	650270000	547810000	702650000	586100000	667630000	0.908	1.05	0.884	1.134	0.946	1.078	1.191	4.74E-03
O43379	WD repeat-containing protein 62	WDR62	4.8	165.95	11.797	5	3	3	2	1	1	1	0	0	3	3	2	2	1	1	3	3	2	2	1	1	45402000	37581000	0	0	0	0	1.094	0.906					0.828
O43390	Heterogeneous nuclear ribonucleoprotein R	HNRNPR	52.3	70.942	212.77	356	32	25	59	62	57	63	57	58	32	31	32	31	31	31	25	25	25	25	25	25	14575000000	13959000000	14258000000	13548000000	14353000000	13527000000	1.038	0.994	1.016	0.965	1.023	0.964	0.95	1.32E-02
O43395	U4/U6 small nuclear ribonucleoprotein Prp3	PRPF3	43.8	77.528	153.71	165	24	24	28	29	27	27	27	27	19	21	19	19	18	17	19	21	19	19	18	17	1960000000	2102700000	1917100000	2074500000	1943800000	2065400000	0.975	1.046	0.954	1.032	0.967	1.027	1.072	1.12E-03
O43396	Thioredoxin-like protein 1	TXNL1	50.2	32.251	64.596	55	10	10	9	12	8	9	8	9	8	10	9	9	8	9	8	10	9	9	8	9	410480000	436910000	422070000	413980000	437170000	467610000	0.952	1.013	0.978	0.96	1.013	1.084	1.038	4.02E-01
O43399	Tumor protein D54	TPD52L2	53.9	22.237	189.99	67	10	10	10	12	14	10	11	10	10	10	10	10	10	10	10	10	10	10	10	10	1511500000	1436300000	1556400000	1504400000	1437900000	1543100000	1.009	0.959	1.039	1.004	0.96	1.03	0.995	8.82E-01
O43402	ER membrane protein complex subunit 8	EMC8	45.7	23.773	41.087	48	7	7	7	6	11	8	7	9	6	6	7	6	6	6	6	6	7	6	6	6	742170000	826980000	626380000	727150000	646450000	945330000	0.986	1.099	0.832	0.966	0.859	1.256	1.24	8.98E-02
O43427	Acidic fibroblast growth factor intracellular-binding protein	FIBP	7.1	41.878	5.7696	7	2	2	1	2	1	2	1	0	1	2	1	2	2	1	1	2	1	2	2	1	0	30832000	0	27410000	24737000	0		1.115		0.991	0.894		1.177
O43432	Eukaryotic translation initiation factor 4 gamma 3	EIF4G3	6.9	176.65	35.476	15	9	4	3	3	3	2	3	1	8	8	8	8	8	7	3	3	3	3	3	2	62985000	66778000	61084000	69599000	57533000	75837000	0.96	1.017	0.931	1.06	0.877	1.155	1.169	3.07E-02
O43439	Protein CBFA2T2	CBFA2T2	2.6	67.132	2.4142	4	1	1	0	1	2	0	0	1	1	1	1	1	1	1	1	1	1	1	1	1	0	9260600	8448300	7950800	10558000	0		1.023	0.933	0.878	1.166		0.906	5.45E-01
O43447	Peptidyl-prolyl cis-trans isomerase H	PPIH	34.5	19.208	15.497	54	7	7	9	8	10	10	7	10	6	6	7	7	6	7	6	6	7	7	6	7	515200000	537170000	649080000	564830000	591460000	602000000	0.893	0.932	1.126	0.98	1.026	1.044	0.971	7.09E-01
O43464	Serine protease HTRA2, mitochondrial	HTRA2	14.4	48.84	19.086	22	5	5	3	3	2	5	5	4	3	3	3	3	4	5	3	3	3	3	4	5	159730000	181400000	178920000	189680000	197320000	178010000	0.883	1.003	0.989	1.049	1.091	0.984	1.024	7.21E-01
O43482	Protein Mis18-beta	OIP5	14	24.691	11.034	10	2	2	3	1	1	2	2	1	2	2	2	2	2	2	2	2	2	2	2	2	50881000	32612000	58293000	38451000	55875000	41448000	1.1	0.705	1.26	0.831	1.208	0.896	0.682	6.68E-03
O43488	Aflatoxin B1 aldehyde reductase member 2	AKR7A2	30.6	39.589	17.877	25	8	8	5	5	2	5	3	5	8	8	6	8	5	8	8	8	6	8	5	8	316730000	333870000	287630000	298980000	332540000	345090000	0.992	1.046	0.901	0.937	1.042	1.081	1.044	5.14E-01
O43491	Band 4.1-like protein 2	EPB41L2	57.1	112.59	323.31	402	46	44	62	68	67	65	67	73	40	42	45	43	45	44	38	40	43	41	43	42	10365000000	9786300000	10141000000	9763100000	10756000000	9855600000	1.025	0.968	1.003	0.966	1.064	0.975	0.941	7.65E-02
O43493	Trans-Golgi network integral membrane protein 2	TGOLN2	8.3	51.112	12.211	11	3	3	1	2	2	2	2	2	1	2	2	3	3	2	1	2	2	3	3	2	0	51528000	78107000	45792000	61391000	63467000		0.858	1.301	0.762	1.022	1.057	0.768	1.76E-01
O43504	Ragulator complex protein LAMTOR5	LAMTOR5	96.7	9.6138	97.913	60	5	5	11	10	10	13	8	8	5	5	5	5	5	5	5	5	5	5	5	5	1224000000	978910000	1033800000	1042400000	983930000	998570000	1.173	0.938	0.991	0.999	0.943	0.957	0.932	3.83E-01
O43520	Phospholipid-transporting ATPase IC	ATP8B1	14.9	143.69	57.885	48	16	14	7	6	11	7	10	7	12	10	13	10	11	11	10	9	11	9	10	9	293300000	309500000	342220000	316280000	284840000	281160000	0.963	1.016	1.124	1.039	0.935	0.923	0.985	8.41E-01
O43583	Density-regulated protein	DENR	44.4	22.092	18.86	41	8	8	8	6	7	8	5	7	7	7	6	7	6	7	7	7	6	7	6	7	174100000	178080000	177380000	194370000	170690000	188700000	0.964	0.986	0.982	1.077	0.945	1.045	1.075	6.52E-02
O43592	Exportin-T	XPOT	30.4	109.96	115.78	110	22	22	17	21	19	18	19	16	19	22	19	19	18	19	19	22	19	19	18	19	491580000	656580000	549360000	612720000	585100000	711110000	0.818	1.092	0.914	1.019	0.973	1.183	1.218	4.00E-02
O43598	2'-deoxynucleoside 5'-phosphate N-hydrolase 1	DNPH1	33.3	19.108	29.874	15	3	3	1	3	3	2	1	5	3	3	3	3	3	3	3	3	3	3	3	3	45416000	79573000	63914000	68475000	44474000	73652000	0.726	1.271	1.021	1.094	0.711	1.177	1.441	3.32E-02
O43615	Mitochondrial import inner membrane translocase subunit TIM44	TIMM44	41.6	51.355	150.38	139	18	18	23	25	21	23	22	25	17	18	18	18	18	17	17	18	18	18	18	17	3086600000	3163300000	3178400000	2980700000	3289600000	2949500000	0.993	1.018	1.023	0.959	1.058	0.949	0.952	1.59E-01
O43633	Charged multivesicular body protein 2a	CHMP2A	23.4	25.104	14.53	13	6	6	3	3	1	2	1	3	4	6	4	6	4	6	4	6	4	6	4	6	104140000	121220000	134210000	98906000	129990000	112900000	0.891	1.037	1.148	0.846	1.112	0.966	0.904	3.61E-01
O43657	Tetraspanin-6	TSPAN6	22.9	27.563	19.993	33	6	6	5	6	6	6	4	6	5	5	6	5	5	5	5	5	6	5	5	5	225990000	191860000	259950000	185470000	241650000	197600000	1.041	0.884	1.197	0.854	1.113	0.91	0.79	8.14E-03
O43660	Pleiotropic regulator 1	PLRG1	66.7	57.193	201.4	178	26	26	28	30	29	28	34	29	26	24	25	24	25	24	26	24	25	24	25	24	2874400000	2775000000	2901300000	2747500000	2962900000	2736600000	1.015	0.98	1.024	0.97	1.046	0.966	0.945	5.02E-03
O43663	Protein regulator of cytokinesis 1	PRC1	20.8	71.606	20.777	40	13	13	6	7	7	6	6	8	10	11	10	9	11	10	10	11	10	9	11	10	244890000	239610000	252920000	253480000	235930000	214680000	1.019	0.997	1.053	1.055	0.982	0.894	0.965	5.23E-01
O43670	BUB3-interacting and GLEBS motif-containing protein ZNF207	ZNF207	16.7	50.75	20.6	52	7	7	9	9	8	8	10	8	7	5	6	5	7	5	7	5	6	5	7	5	1006700000	1192400000	839060000	1138900000	1045200000	896110000	0.987	1.169	0.823	1.117	1.025	0.879	1.116	3.69E-01
O43674	NADH dehydrogenase [ubiquinone] 1 beta subcomplex subunit 5, mitochondrial	NDUFB5	25.4	21.75	7.3345	18	5	5	4	3	3	2	4	2	5	5	5	5	5	5	5	5	5	5	5	5	486240000	401880000	505420000	425000000	461960000	482030000	1.056	0.873	1.098	0.923	1.003	1.047	0.9	1.48E-01
O43676	NADH dehydrogenase [ubiquinone] 1 beta subcomplex subunit 3	NDUFB3	28.6	11.402	5.6412	20	3	3	4	3	3	3	3	4	3	3	3	3	3	3	3	3	3	3	3	3	325120000	273020000	271060000	293230000	328100000	244090000	1.125	0.944	0.938	1.014	1.135	0.844	0.877	1.80E-01
O43677	NADH dehydrogenase [ubiquinone] 1 subunit C1, mitochondrial	NDUFC1	27.6	8.7341	4.8169	5	2	2	1	0	1	0	1	2	2	2	2	2	2	2	2	2	2	2	2	2	58031000	61803000	54932000	58992000	69923000	43697000	1.002	1.067	0.949	1.019	1.208	0.755	0.899	4.45E-01
O43678	NADH dehydrogenase [ubiquinone] 1 alpha subcomplex subunit 2	NDUFA2	40.4	10.921	11.575	25	3	3	2	5	3	5	5	5	3	3	3	3	3	3	3	3	3	3	3	3	180770000	247080000	258490000	221080000	233400000	247510000	0.781	1.068	1.117	0.955	1.009	1.07	1.064	5.90E-01
O43681	ATPase ASNA1	ASNA1	35.6	38.792	34.448	62	9	9	11	11	9	12	10	9	9	9	9	8	8	8	9	9	9	8	8	8	608310000	588720000	609470000	609930000	582400000	582650000	1.019	0.986	1.021	1.022	0.976	0.976	0.99	6.31E-01
O43684	Mitotic checkpoint protein BUB3	BUB3	51.2	37.154	126.03	103	13	13	14	17	17	23	15	17	12	13	12	13	13	12	12	13	12	13	13	12	2975100000	2693600000	2792900000	3286200000	2994600000	3106900000	1	0.905	0.939	1.105	1.007	1.044	1.037	5.94E-01
O43688	Phospholipid phosphatase 2	PLPP2	19.1	32.573	21.131	20	4	4	1	4	4	3	5	3	2	3	3	3	4	3	2	3	3	3	4	3	85157000	79219000	98367000	84147000	59136000	73110000	1.066	0.992	1.232	1.054	0.741	0.916	0.975	8.72E-01
O43707	Alpha-actinin-4	ACTN4	71.2	104.85	323.31	1075	61	41	163	186	163	201	165	197	60	60	60	61	61	59	40	41	41	41	41	40	70196000000	87534000000	68199000000	89068000000	70212000000	86292000000	0.893	1.114	0.868	1.133	0.893	1.098	1.26	6.26E-05
O43708	Maleylacetoacetate isomerase	GSTZ1	13	24.212	6.7292	16	2	2	3	4	4	0	2	3	2	2	2	1	2	2	2	2	2	1	2	2	56599000	50175000	55441000	0	0	64639000	0.998	0.885	0.978			1.14	1.025	8.66E-01
O43709	Probable 18S rRNA (guanine-N(7))-methyltransferase	WBSCR22	21	31.88	10.464	13	4	4	2	2	5	1	3	0	2	2	4	3	4	2	2	2	4	3	4	2	139490000	147620000	140400000	122560000	123480000	132000000	1.039	1.1	1.046	0.913	0.92	0.983	0.997	9.67E-01
O43715	TP53-regulated inhibitor of apoptosis 1	TRIAP1	55.3	8.7858	8.6782	19	4	4	4	3	3	3	3	3	4	4	4	3	4	3	4	4	4	3	4	3	114810000	87605000	87291000	90760000	109840000	71157000	1.227	0.936	0.933	0.97	1.174	0.76	0.8	1.17E-01
O43716	Glutamyl-tRNA(Gln) amidotransferase subunit C, mitochondrial	GATC	53.7	15.086	27.681	16	6	6	2	2	4	2	3	3	6	5	5	4	5	4	6	5	5	4	5	4	260380000	294120000	200230000	211560000	218210000	251760000	1.088	1.229	0.836	0.884	0.912	1.052	1.116	4.28E-01
O43719	HIV Tat-specific factor 1	HTATSF1	24.6	85.852	89.791	56	13	13	9	10	10	10	7	10	10	10	10	12	10	11	10	10	10	12	10	11	419780000	511370000	459140000	562580000	418800000	513670000	0.873	1.063	0.955	1.17	0.871	1.068	1.223	1.06E-02
O43739	Cytohesin-3	CYTH3	17.2	46.348	21.893	22	5	3	4	4	5	3	4	2	4	4	5	3	5	2	3	3	3	2	3	1	71639000	60992000	65307000	69295000	71155000	66828000	1.061	0.903	0.967	1.026	1.054	0.99	0.947	3.15E-01
O43747	AP-1 complex subunit gamma-1	AP1G1	30.8	91.35	122.86	123	20	20	19	21	21	20	20	22	20	19	20	19	20	20	20	19	20	19	20	20	1556100000	1927100000	1615300000	1628400000	1684200000	1681800000	0.925	1.146	0.96	0.968	1.001	1	1.079	2.69E-01
O43752	Syntaxin-6	STX6	38	29.176	42.616	38	7	7	7	6	7	4	6	8	6	7	6	6	6	7	6	7	6	6	6	7	241470000	225900000	243420000	199700000	254550000	206880000	1.056	0.988	1.065	0.873	1.113	0.905	0.855	1.55E-02
O43760	Synaptogyrin-2	SYNGR2	20.5	24.81	9.9532	27	5	5	4	5	4	4	5	5	5	5	5	5	5	5	5	5	5	5	5	5	340680000	316680000	295290000	262960000	322300000	286930000	1.12	1.041	0.971	0.865	1.06	0.943	0.904	2.08E-01
O43765	Small glutamine-rich tetratricopeptide repeat-containing protein alpha	SGTA	23	34.063	17.64	42	6	6	6	8	7	7	6	8	6	6	6	6	6	6	6	6	6	6	6	6	396860000	409570000	397650000	409300000	362260000	438150000	0.986	1.018	0.988	1.017	0.9	1.089	1.087	9.12E-02
O43766	Lipoyl synthase, mitochondrial	LIAS	33.3	41.911	63.971	35	7	7	7	4	5	7	6	6	6	5	5	5	6	6	6	5	5	5	6	6	207760000	174800000	224840000	172440000	166500000	158320000	1.128	0.949	1.221	0.937	0.904	0.86	0.844	1.59E-01
O43768	Alpha-endosulfine	ENSA	30.6	13.389	5.9203	13	3	2	2	2	2	2	2	3	3	3	3	3	3	3	2	2	2	2	2	2	63444000	30719000	68407000	52563000	82725000	61572000	1.059	0.513	1.142	0.877	1.381	1.028	0.675	9.85E-02
O43776	Asparagine--tRNA ligase, cytoplasmic	NARS	42.2	62.942	111.53	122	18	18	19	17	24	23	20	19	16	17	17	18	18	18	16	17	17	18	18	18	2317600000	2583000000	2398700000	2518400000	2411600000	2644700000	0.935	1.042	0.968	1.016	0.973	1.067	1.087	1.17E-02
O43795	Unconventional myosin-Ib	MYO1B	41.9	131.98	258.09	310	41	38	44	59	46	57	48	56	41	39	40	41	41	39	38	36	37	38	38	36	4925400000	6547000000	4958600000	6244300000	5065500000	6628100000	0.86	1.143	0.866	1.09	0.884	1.157	1.299	2.78E-04
O43808	Peroxisomal membrane protein PMP34	SLC25A17	13.4	34.566	10.475	17	4	4	2	3	3	3	4	2	2	4	4	4	4	4	2	4	4	4	4	4	65790000	70721000	51510000	59789000	75470000	56336000	1.04	1.118	0.814	0.945	1.193	0.89	0.969	8.22E-01
O43809	Cleavage and polyadenylation specificity factor subunit 5	NUDT21	75.3	26.227	132.8	105	15	15	15	24	15	17	15	19	14	14	13	15	13	14	14	14	13	15	13	14	2062600000	2229900000	2382500000	2025300000	2279000000	2108400000	0.946	1.022	1.092	0.928	1.045	0.967	0.946	3.41E-01
O43813	LanC-like protein 1	LANCL1	12.5	45.283	11.623	18	4	4	3	3	3	3	3	3	4	4	3	4	4	3	4	4	3	4	4	3	121740000	97105000	145840000	100350000	113730000	107600000	1.064	0.849	1.275	0.877	0.994	0.941	0.8	6.62E-02
O43815	Striatin	STRN	34.6	86.131	73.311	78	19	19	9	12	15	16	13	13	13	15	15	18	15	12	13	15	15	18	15	12	421210000	442470000	436850000	427070000	399440000	415890000	0.994	1.044	1.031	1.008	0.942	0.981	1.022	5.23E-01
O43818	U3 small nucleolar RNA-interacting protein 2	RRP9	54.9	51.84	105.6	117	18	18	21	20	19	18	20	19	17	17	18	17	17	16	17	17	18	17	17	16	1645700000	1420400000	1538800000	1488400000	1605400000	1536900000	1.069	0.923	1	0.967	1.043	0.998	0.928	6.71E-02
O43819	Protein SCO2 homolog, mitochondrial	SCO2	25.2	29.81	37.927	15	5	5	3	3	4	1	2	2	4	4	5	5	4	3	4	4	5	5	4	3	153630000	158550000	184760000	161870000	202400000	154500000	0.908	0.937	1.091	0.956	1.196	0.913	0.878	2.67E-01
O43823	A-kinase anchor protein 8	AKAP8	28.6	76.107	73.399	74	13	13	12	16	12	9	14	11	12	12	13	12	12	12	12	12	13	12	12	12	601270000	573340000	575940000	609800000	566090000	531430000	1.043	0.995	0.999	1.058	0.982	0.922	0.984	7.21E-01
O43837	Isocitrate dehydrogenase [NAD] subunit beta, mitochondrial	IDH3B	50.4	42.183	88.087	112	16	16	20	15	21	16	19	21	15	15	16	16	15	16	15	15	16	16	15	16	2573900000	2258700000	2733800000	2280400000	2803500000	2220100000	1.039	0.911	1.103	0.92	1.131	0.896	0.833	3.02E-03
O43847	Nardilysin	NRDC	16.4	131.57	58.401	58	16	16	11	10	8	10	9	10	14	16	16	15	13	15	14	16	16	15	13	15	395280000	385250000	445630000	442090000	368190000	419180000	0.966	0.941	1.089	1.08	0.9	1.024	1.031	6.80E-01
O43852	Calumenin	CALU	70.8	37.106	286.96	275	19	19	48	45	45	46	45	46	17	18	18	18	17	18	17	18	18	18	17	18	12004000000	10655000000	11414000000	11120000000	12133000000	9567600000	1.077	0.956	1.024	0.997	1.088	0.858	0.882	5.15E-02
O43854	EGF-like repeat and discoidin I-like domain-containing protein 3	EDIL3	8.1	53.764	10.515	19	4	4	3	4	4	3	3	2	4	4	4	4	3	4	4	4	4	4	3	4	84520000	74485000	86625000	60505000	86968000	83730000	1.064	0.937	1.09	0.761	1.094	1.054	0.847	1.93E-01
O43865	Adenosylhomocysteinase 2	AHCYL1	40.4	58.951	104.27	125	19	9	20	20	16	26	20	23	19	16	17	19	17	19	9	8	8	9	8	9	1202400000	1202300000	1123300000	1319300000	1186200000	1346200000	0.978	0.978	0.913	1.073	0.964	1.095	1.101	7.79E-02
O43913	Origin recognition complex subunit 5	ORC5	14.3	50.282	14.178	24	7	7	4	4	4	4	5	3	6	7	7	6	7	7	6	7	7	6	7	7	83137000	80327000	91500000	83401000	95701000	101340000	0.932	0.9	1.025	0.935	1.072	1.136	0.981	8.27E-01
O43920	NADH dehydrogenase [ubiquinone] iron-sulfur protein 5	NDUFS5	57.5	12.517	30.829	50	6	6	7	9	7	10	8	9	6	6	6	6	6	6	6	6	6	6	6	6	624160000	673630000	677380000	545040000	710990000	597420000	0.978	1.056	1.062	0.854	1.114	0.936	0.902	2.20E-01
O43924	Retinal rod rhodopsin-sensitive cGMP 3',5'-cyclic phosphodiesterase subunit delta	PDE6D	28.7	17.42	8.9579	5	3	3	2	1	0	1	1	0	3	2	3	3	2	2	3	2	3	3	2	2	42164000	43844000	41192000	32010000	0	39342000	1.062	1.104	1.037	0.806		0.991	0.921	5.16E-01
O43933	Peroxisome biogenesis factor 1	PEX1	2.9	142.87	20.203	11	3	3	2	3	2	0	3	1	2	2	2	2	3	2	2	2	2	2	3	2	16525000	0	19822000	13566000	20056000	13774000	0.987		1.184	0.81	1.197	0.822	0.727	4.00E-02
O60216	Double-strand-break repair protein rad21 homolog	RAD21	38.4	71.689	101.71	106	21	21	19	16	21	17	16	17	18	18	19	19	17	19	18	18	19	19	17	19	935150000	944810000	892170000	1025300000	979650000	1006900000	0.97	0.98	0.925	1.064	1.016	1.045	1.061	1.81E-01
O60220	Mitochondrial import inner membrane translocase subunit Tim8 A	TIMM8A	68	10.998	63.59	37	4	4	5	6	5	7	6	8	4	4	4	4	4	4	4	4	4	4	4	4	1863200000	1849800000	2006400000	1856300000	2139600000	1787900000	0.972	0.965	1.047	0.968	1.116	0.933	0.914	1.07E-01
O60231	Putative pre-mRNA-splicing factor ATP-dependent RNA helicase DHX16	DHX16	37.2	119.26	205.17	210	31	30	34	36	33	37	32	38	27	31	30	31	30	31	26	30	29	30	29	30	1568300000	1921600000	1604500000	1992300000	1601500000	2272800000	0.858	1.052	0.878	1.091	0.877	1.244	1.296	4.87E-02
O60232	Sjoegren syndrome/scleroderma autoantigen 1	SSSCA1	59.8	21.474	42.183	61	7	7	9	11	8	12	11	10	6	7	6	7	7	7	6	7	6	7	7	7	664730000	590640000	634670000	690070000	660210000	588410000	1.042	0.926	0.995	1.081	1.035	0.922	0.954	4.35E-01
O60238	BCL2/adenovirus E1B 19 kDa protein-interacting protein 3-like	BNIP3L	6.8	23.93	9.0078	9	1	1	2	2	2	1	1	1	1	1	1	1	1	1	1	1	1	1	1	1	58819000	0	35739000	0	57738000	45419000	1.19		0.723		1.168	0.919	0.895
O60244	Mediator of RNA polymerase II transcription subunit 14	MED14	12.7	160.6	31.148	24	12	12	5	5	3	3	2	6	10	11	11	10	9	11	10	11	11	10	9	11	313840000	276120000	249430000	224560000	202930000	312020000	1.193	1.049	0.948	0.853	0.771	1.186	1.061	7.24E-01
O60248	Protein SOX-15	SOX15	54.1	25.251	39.74	35	6	6	4	6	6	6	7	6	5	5	5	5	5	5	5	5	5	5	5	5	171980000	215950000	169910000	200280000	174920000	202900000	0.908	1.141	0.897	1.058	0.924	1.072	1.198	2.52E-03
O60256	Phosphoribosyl pyrophosphate synthase-associated protein 2	PRPSAP2	23.3	40.925	13.556	29	7	6	4	4	5	3	6	7	6	6	6	7	7	7	5	5	5	6	6	6	350610000	284910000	276500000	307600000	293180000	328290000	1.143	0.929	0.901	1.002	0.955	1.07	1.001	9.95E-01
O60264	SWI/SNF-related matrix-associated actin-dependent regulator of chromatin subfamily A member 5	SMARCA5	43.2	121.9	274.11	261	43	30	46	48	45	40	44	38	41	41	40	40	40	38	29	29	28	29	29	29	3757100000	3718900000	3757200000	3500600000	3839800000	3842500000	1.006	0.995	1.006	0.937	1.028	1.029	0.974	4.01E-01
O60271	C-Jun-amino-terminal kinase-interacting protein 4	SPAG9	20.4	146.2	72.11	62	19	17	9	9	10	8	11	15	11	14	15	15	14	16	11	13	13	14	13	15	377160000	441000000	370050000	404540000	387100000	465160000	0.926	1.082	0.908	0.993	0.95	1.141	1.156	3.25E-02
O60281	Zinc finger protein 292	ZNF292	1.8	304.81	4.7971	6	3	3	1	1	1	1	1	1	2	3	2	3	2	3	2	3	2	3	2	3	56164000	75995000	36614000	92889000	41347000	45286000	0.968	1.309	0.631	1.6	0.712	0.78	1.597	1.53E-01
O60287	Nucleolar pre-ribosomal-associated protein 1	URB1	28.8	254.39	215.06	201	50	50	38	31	37	26	34	35	47	40	46	37	42	40	47	40	46	37	42	40	1822000000	1547600000	1683800000	1478200000	1770800000	1589800000	1.105	0.939	1.021	0.897	1.074	0.964	0.875	1.31E-02
O60292	Signal-induced proliferation-associated 1-like protein 3	SIPA1L3	21.1	194.61	119.86	77	25	25	12	14	11	15	12	13	16	17	18	19	19	19	16	17	18	19	19	19	444120000	515470000	433480000	540260000	475050000	515610000	0.911	1.058	0.889	1.109	0.975	1.058	1.162	8.18E-03
O60293	Zinc finger C3H1 domain-containing protein	ZFC3H1	9.9	226.35	53.285	47	13	13	7	9	9	6	9	7	12	12	12	12	13	12	12	12	12	12	13	12	249910000	344740000	252850000	307200000	251070000	247410000	0.907	1.251	0.918	1.115	0.911	0.898	1.193	2.29E-01
O60306	Intron-binding protein aquarius	AQR	31.4	171.29	213.29	186	36	35	30	26	35	28	38	29	33	34	31	31	32	32	32	33	30	30	31	31	1774000000	1779200000	1740400000	1817100000	1749100000	1811600000	0.997	1	0.979	1.022	0.983	1.019	1.027	3.62E-02
O60313	Dynamin-like 120 kDa protein, mitochondrial	OPA1	62.9	111.63	323.31	392	52	52	60	65	68	68	67	64	48	50	49	48	52	50	48	50	49	48	52	50	7560100000	7058000000	7632500000	6745100000	8008000000	7126300000	1.028	0.96	1.038	0.917	1.089	0.969	0.902	1.41E-02
O60318	Germinal-center associated nuclear protein	MCM3AP	14.7	218.4	88.505	53	15	15	9	6	13	4	13	8	12	9	14	12	14	12	12	9	14	12	14	12	325450000	270010000	384210000	301240000	353740000	292010000	1.014	0.841	1.197	0.938	1.102	0.909	0.812	2.60E-02
O60333	Kinesin-like protein KIF1B	KIF1B	3.5	204.47	28.08	13	4	3	2	2	4	2	2	1	4	3	4	3	4	3	3	2	3	2	3	2	27888000	36154000	29232000	43892000	26067000	41527000	0.817	1.059	0.857	1.286	0.764	1.217	1.461	6.56E-03
O60337	E3 ubiquitin-protein ligase MARCH6	MARCH6	4.5	102.54	13.155	5	3	3	1	0	1	1	1	1	3	2	3	2	3	2	3	2	3	2	3	2	61231000	0	37992000	31665000	38122000	0	1.449		0.899	0.749	0.902		0.692
O60341	Lysine-specific histone demethylase 1A	KDM1A	42.1	92.902	99.743	98	22	22	16	15	17	18	16	16	16	15	18	19	17	18	16	15	18	19	17	18	765450000	757040000	744130000	743750000	686100000	764280000	1.03	1.018	1.001	1	0.923	1.028	1.032	3.98E-01
O60343	TBC1 domain family member 4	TBC1D4	9.2	146.56	52.726	18	7	6	2	4	3	2	2	5	5	4	6	4	3	6	4	4	5	3	2	5	79231000	68738000	72667000	83940000	83526000	84568000	1.006	0.873	0.922	1.066	1.06	1.073	1.008	9.25E-01
O60353	Frizzled-6	FZD6	19.5	79.291	28.256	25	9	9	4	4	3	4	6	4	6	5	6	5	8	8	6	5	6	5	8	8	134310000	117230000	131120000	144310000	161270000	134020000	0.98	0.855	0.957	1.053	1.177	0.978	0.927	4.50E-01
O60361	Putative nucleoside diphosphate kinase	NME2P1	66.4	15.529	-2	7	9	1	2	1	1	1	1	1	9	8	9	8	8	8	1	1	1	1	1	1	109730000	115710000	127350000	107390000	113270000	134550000	0.93	0.981	1.079	0.91	0.96	1.14	1.021	8.14E-01
O60443	Non-syndromic hearing impairment protein 5	DFNA5	46.2	54.554	86.761	78	17	17	13	12	13	14	13	13	13	14	14	13	12	13	13	14	14	13	12	13	569820000	605260000	626130000	632200000	617240000	609870000	0.934	0.992	1.026	1.036	1.012	1	1.019	5.88E-01
O60447	Ecotropic viral integration site 5 protein homolog	EVI5	9	92.948	2.5712	2	3	3	0	1	0	0	1	0	3	3	3	2	3	1	3	3	3	2	3	1	0	163230000	0	0	184830000	0		0.938			1.062		0.883
O60476	Mannosyl-oligosaccharide 1,2-alpha-mannosidase IB	MAN1A2	10.1	73.003	26.834	20	4	4	3	3	4	3	4	3	4	4	4	4	4	4	4	4	4	4	4	4	111340000	88164000	105100000	91803000	117440000	131720000	1.035	0.819	0.977	0.853	1.092	1.224	0.934	6.35E-01
O60487	Myelin protein zero-like protein 2	MPZL2	14	24.484	6.1607	17	3	3	3	4	3	2	3	2	3	3	2	3	3	3	3	3	2	3	3	3	202680000	194710000	184770000	184310000	172930000	176610000	1.09	1.047	0.993	0.991	0.93	0.95	0.992	8.83E-01
O60488	Long-chain-fatty-acid--CoA ligase 4	ACSL4	51.6	79.187	237.97	210	27	25	39	34	34	33	39	31	27	24	25	24	26	23	25	22	23	22	24	21	4528700000	3593700000	4754100000	3799200000	4940600000	3613800000	1.077	0.855	1.131	0.903	1.175	0.859	0.774	1.40E-03
O60493	Sorting nexin-3	SNX3	33.3	18.762	19.592	34	5	5	5	6	6	6	6	5	5	5	5	5	5	5	5	5	5	5	5	5	525400000	415810000	404570000	474050000	473200000	440320000	1.153	0.913	0.888	1.041	1.039	0.967	0.948	5.65E-01
O60499	Syntaxin-10	STX10	37.8	28.114	40.372	27	8	8	4	4	6	5	3	5	6	5	7	6	4	5	6	5	7	6	4	5	138010000	141430000	149010000	160220000	143860000	150850000	0.937	0.961	1.012	1.088	0.977	1.025	1.05	3.16E-01
O60502	Protein O-GlcNAcase	MGEA5	31.6	102.91	84.542	67	20	20	10	11	10	12	12	12	16	17	14	15	15	15	16	17	14	15	15	15	363200000	389450000	321900000	393980000	353220000	356200000	1.001	1.073	0.887	1.085	0.973	0.981	1.098	1.21E-01
O60503	Adenylate cyclase type 9	ADCY9	2.1	150.7	3.6917	6	3	3	1	0	1	1	2	1	3	2	2	3	3	2	3	2	2	3	3	2	203820000	0	251870000	185810000	207130000	196210000	0.975		1.205	0.889	0.991	0.939	0.865	2.38E-01
O60506	Heterogeneous nuclear ribonucleoprotein Q	SYNCRIP	53	69.602	228.5	329	30	23	48	59	55	54	55	58	30	29	30	28	29	29	23	23	23	22	23	23	11968000000	12916000000	12186000000	13153000000	11378000000	12931000000	0.963	1.04	0.981	1.059	0.916	1.041	1.098	1.03E-02
O60508	Pre-mRNA-processing factor 17	CDC40	43.9	65.521	71.666	94	18	18	18	15	16	13	18	14	16	15	17	14	17	16	16	15	17	14	17	16	674340000	672920000	692570000	674060000	714710000	578260000	1.01	1.008	1.037	1.009	1.07	0.866	0.925	1.98E-01
O60513	Beta-1,4-galactosyltransferase 4	B4GALT4	9.9	40.041	3.89	4	2	2	1	1	0	1	1	0	1	2	2	2	2	1	1	2	2	2	2	1	0	47886000	0	44702000	34906000	0		1.127		1.052	0.821		1.326
O60518	Ran-binding protein 6	RANBP6	31.8	124.71	111.56	129	27	26	20	22	18	24	23	22	20	23	23	23	22	24	19	22	22	22	21	23	893900000	941160000	850180000	949780000	888420000	947910000	0.98	1.032	0.932	1.042	0.974	1.039	1.078	7.96E-03
O60524	Nuclear export mediator factor NEMF	NEMF	8.5	122.95	10.264	14	8	8	1	4	3	3	2	1	6	6	7	5	6	5	6	6	7	5	6	5	96161000	98543000	86363000	108630000	100120000	97103000	0.983	1.007	0.883	1.111	1.024	0.993	1.077	2.58E-01
O60547	GDP-mannose 4,6 dehydratase	GMDS	31.7	41.949	20.777	30	9	9	5	6	4	4	4	7	8	7	6	7	7	8	8	7	6	7	7	8	155370000	174580000	157230000	154710000	164460000	154250000	0.97	1.09	0.982	0.966	1.027	0.963	1.014	7.81E-01
O60551	Glycylpeptide N-tetradecanoyltransferase 2	NMT2	30.7	56.98	26.475	26	11	7	3	6	3	4	5	5	8	11	8	10	8	9	5	7	4	6	5	5	149920000	211120000	144580000	179730000	150630000	186220000	0.88	1.239	0.849	1.055	0.884	1.093	1.296	1.08E-02
O60563	Cyclin-T1	CCNT1	24.4	80.684	68.101	62	14	14	6	10	11	12	13	10	12	13	11	13	12	12	12	13	11	13	12	12	521310000	404470000	415840000	411210000	477340000	336100000	1.219	0.946	0.972	0.961	1.116	0.786	0.814	8.74E-02
O60568	Procollagen-lysine,2-oxoglutarate 5-dioxygenase 3	PLOD3	48.9	84.784	111.52	205	27	27	37	33	33	33	36	33	27	25	24	26	24	25	27	25	24	26	24	25	4235200000	4200200000	4360800000	3880800000	4220600000	4094400000	1.017	1.008	1.047	0.932	1.013	0.983	0.95	1.09E-01
O60573	Eukaryotic translation initiation factor 4E type 2	EIF4E2	31	28.362	21.863	29	6	6	5	5	4	5	4	6	5	5	5	5	5	6	5	5	5	5	5	6	193800000	172860000	166330000	243970000	170480000	228470000	0.989	0.882	0.849	1.245	0.87	1.166	1.216	1.75E-01
O60610	Protein diaphanous homolog 1	DIAPH1	36.6	141.35	253.91	196	37	37	32	35	29	32	34	34	34	36	33	33	34	36	34	36	33	33	34	36	2001700000	2343800000	2080700000	2417500000	2023100000	2136000000	0.924	1.082	0.96	1.116	0.934	0.986	1.13	3.93E-02
O60613	15 kDa selenoprotein	SEP15	43.2	17.79	21.66	31	4	4	5	7	4	5	5	5	3	4	3	4	4	4	3	4	3	4	4	4	557990000	454660000	601680000	429280000	503010000	414870000	1.13	0.921	1.219	0.87	1.019	0.841	0.781	1.70E-02
O60645	Exocyst complex component 3	EXOC3	11.6	86.844	23.683	19	7	7	2	2	5	3	4	3	4	5	5	6	5	5	4	5	5	6	5	5	119630000	135020000	125820000	145010000	147160000	127870000	0.897	1.012	0.943	1.087	1.103	0.958	1.039	6.27E-01
O60664	Perilipin-3	PLIN3	63.6	47.074	207.01	148	17	17	21	26	23	28	23	27	15	17	16	17	16	16	15	17	16	17	16	16	2429100000	2840600000	2592200000	2975400000	2626100000	2907900000	0.89	1.041	0.95	1.09	0.962	1.066	1.141	7.64E-03
O60678	Protein arginine N-methyltransferase 3	PRMT3	24.9	59.875	23.582	40	11	11	7	6	7	8	7	5	8	7	10	8	9	8	8	7	10	8	9	8	252810000	301780000	273160000	284340000	294280000	280740000	0.899	1.073	0.971	1.011	1.047	0.998	1.057	3.18E-01
O60684	Importin subunit alpha-7	KPNA6	27.8	60.029	62.725	39	11	7	7	4	7	5	9	7	9	9	10	10	11	9	6	5	7	6	7	5	231900000	227670000	238920000	261910000	221000000	269170000	0.959	0.942	0.988	1.083	0.914	1.113	1.097	1.82E-01
O60701	UDP-glucose 6-dehydrogenase	UGDH	60.5	55.023	74.232	60	19	19	6	9	9	15	10	11	14	14	15	17	15	14	14	14	15	17	15	14	502750000	553820000	453860000	562870000	453220000	563270000	0.976	1.075	0.881	1.093	0.88	1.094	1.192	5.72E-03
O60716	Catenin delta-1	CTNND1	53.7	108.17	323.31	422	41	41	68	65	80	68	77	64	38	38	39	41	40	41	38	38	39	41	40	41	10085000000	9941100000	11173000000	9963000000	11136000000	9981500000	0.972	0.958	1.076	0.96	1.073	0.962	0.923	1.44E-01
O60749	Sorting nexin-2	SNX2	30.3	58.47	70.859	72	14	12	13	12	13	11	10	13	13	12	14	13	11	13	11	10	12	11	9	11	570880000	617270000	616840000	580320000	628900000	648750000	0.935	1.011	1.01	0.951	1.03	1.063	1.016	7.28E-01
O60762	Dolichol-phosphate mannosyltransferase subunit 1	DPM1	47.7	29.634	67.928	73	11	11	13	11	13	10	12	14	10	10	10	10	9	10	10	10	10	10	9	10	1182300000	1181700000	1154700000	1183800000	1229300000	1230500000	0.99	0.99	0.967	0.992	1.03	1.031	1.008	7.32E-01
O60783	28S ribosomal protein S14, mitochondrial	MRPS14	28.9	15.139	38.097	26	3	3	5	3	4	4	6	4	3	2	3	3	3	3	3	2	3	3	3	3	592690000	561000000	618980000	484070000	638860000	628720000	1.009	0.955	1.054	0.824	1.088	1.07	0.904	2.50E-01
O60784	Target of Myb protein 1	TOM1	17.9	53.818	28.446	11	6	6	3	4	0	1	1	2	5	5	3	3	3	3	5	5	3	3	3	3	67177000	95395000	63860000	83332000	69875000	103550000	0.834	1.185	0.793	1.035	0.868	1.286	1.405	1.14E-02
O60825	6-phosphofructo-2-kinase/fructose-2,6-bisphosphatase 2	PFKFB2	6.3	58.476	3.8472	8	3	3	1	0	1	2	3	1	2	2	2	3	3	3	2	2	2	3	3	3	42590000	31967000	36956000	41631000	53559000	36100000	1.052	0.79	0.913	1.029	1.324	0.892	0.824	2.37E-01
O60826	Coiled-coil domain-containing protein 22	CCDC22	16.9	70.755	38.072	21	7	7	4	4	1	4	3	5	6	6	5	6	5	6	6	6	5	6	5	6	110790000	128770000	112970000	112220000	107340000	114590000	0.968	1.125	0.987	0.981	0.938	1.001	1.074	2.07E-01
O60828	Polyglutamine-binding protein 1	PQBP1	45.7	30.472	43.53	39	7	7	7	7	8	4	7	6	5	6	7	6	6	6	5	6	7	6	6	6	338420000	309910000	336890000	233530000	272090000	297790000	1.135	1.04	1.13	0.783	0.913	0.999	0.888	3.34E-01
O60830	Mitochondrial import inner membrane translocase subunit Tim17-B	TIMM17B	29.7	18.273	23.005	26	5	5	5	3	5	4	5	4	4	4	5	4	4	5	4	4	5	4	4	5	327110000	255040000	306470000	255270000	361510000	264240000	1.109	0.865	1.039	0.865	1.226	0.896	0.778	1.08E-02
O60831	PRA1 family protein 2	PRAF2	26.4	19.258	14.312	31	4	4	5	6	5	4	5	6	4	4	4	3	4	3	4	4	4	3	4	3	220770000	251970000	206790000	217700000	215350000	291960000	0.943	1.076	0.883	0.93	0.92	1.247	1.185	1.44E-01
O60832	H/ACA ribonucleoprotein complex subunit 4	DKC1	51.2	57.673	103.97	140	23	23	28	18	26	24	25	19	21	19	22	20	20	22	21	19	22	20	20	22	3562300000	3048700000	3548100000	3042400000	3598400000	3007500000	1.079	0.924	1.075	0.922	1.09	0.911	0.85	1.54E-05
O60841	Eukaryotic translation initiation factor 5B	EIF5B	33.7	138.83	264.32	209	34	34	32	37	36	32	35	37	32	32	32	30	33	33	32	32	32	30	33	33	2124500000	2301800000	2163400000	2344900000	2103000000	2164500000	0.966	1.046	0.983	1.066	0.956	0.984	1.066	7.05E-02
O60869	Endothelial differentiation-related factor 1	EDF1	35.1	16.368	38.026	28	5	5	4	6	4	7	4	3	5	4	4	5	4	4	5	4	4	5	4	4	672990000	798540000	615800000	988300000	845840000	929340000	0.832	0.988	0.762	1.222	1.046	1.15	1.272	9.50E-02
O60870	DNA/RNA-binding protein KIN17	KIN	23.4	45.373	21.02	23	7	7	5	3	2	4	5	4	5	5	4	5	4	6	5	5	4	5	4	6	137790000	180400000	119940000	144750000	133020000	141330000	0.964	1.263	0.839	1.013	0.931	0.989	1.194	1.37E-01
O60879	Protein diaphanous homolog 2	DIAPH2	7.9	125.57	33.32	20	7	7	3	4	4	2	3	4	5	4	6	4	3	5	5	4	6	4	3	5	1679300000	1732300000	1600200000	1421100000	1409000000	1383300000	1.092	1.127	1.041	0.924	0.916	0.9	0.968	7.30E-01
O60884	DnaJ homolog subfamily A member 2	DNAJA2	55.8	45.745	111.67	110	17	17	16	19	18	23	20	14	15	16	17	14	15	13	15	16	17	14	15	13	1943700000	1943000000	1788500000	1914100000	2010100000	1818200000	1.021	1.021	0.94	1.006	1.056	0.955	0.988	7.83E-01
O60885	Bromodomain-containing protein 4	BRD4	17.4	152.22	54.757	90	19	15	16	16	12	12	18	16	18	17	18	16	19	18	14	13	14	12	15	14	576610000	594550000	568500000	542470000	571730000	634850000	0.992	1.023	0.978	0.933	0.983	1.092	1.032	5.65E-01
O60888	Protein CutA	CUTA	39.7	19.116	23.451	15	4	4	5	2	1	3	2	2	4	3	2	4	4	4	4	3	2	4	4	4	118670000	195790000	108630000	150910000	105880000	146610000	0.861	1.421	0.789	1.096	0.769	1.064	1.481	3.01E-02
O60890	Oligophrenin-1	OPHN1	3.5	91.64	4.8006	2	2	2	0	0	0	0	2	0	1	0	1	2	2	1	1	0	1	2	2	1	0	0	0	25325000	24389000	0				1.019	0.981		1.038
O60906	Sphingomyelin phosphodiesterase 2	SMPD2	15.1	47.645	14.509	11	4	4	2	1	2	1	3	2	3	1	2	1	3	1	3	1	2	1	3	1	47204000	57392000	52573000	53935000	55907000	51464000	0.889	1.081	0.99	1.016	1.053	0.97	1.046	4.82E-01
O60925	Prefoldin subunit 1	PFDN1	57.4	14.21	96.994	48	7	7	7	10	6	9	8	8	5	7	5	7	7	6	5	7	5	7	7	6	645720000	656890000	541690000	619770000	556570000	746780000	1.028	1.046	0.863	0.987	0.886	1.189	1.16	1.35E-01
O60927	Protein phosphatase 1 regulatory subunit 11	PPP1R11	39.7	13.952	16.266	15	3	3	3	2	3	2	3	2	2	2	2	2	3	2	2	2	2	2	3	2	61915000	97210000	90451000	79998000	71289000	106170000	0.733	1.15	1.07	0.947	0.844	1.256	1.267	1.55E-01
O60930	Ribonuclease H1	RNASEH1	11.2	32.064	12.925	11	2	2	1	2	2	1	2	3	1	2	2	1	2	2	1	2	2	1	2	2	0	30899000	44353000	0	36300000	30656000		0.869	1.248		1.021	0.862	0.763	2.54E-01
O60934	Nibrin	NBN	52.8	84.958	129.22	125	27	27	16	19	24	21	23	22	22	24	23	21	24	25	22	24	23	21	24	25	1124100000	1150300000	1001700000	1190400000	1104700000	1088900000	1.013	1.036	0.902	1.072	0.995	0.981	1.062	2.40E-01
O60936	Nucleolar protein 3	NOL3	39.4	22.629	16.65	12	5	5	3	2	1	2	2	2	4	4	3	4	2	3	4	4	3	4	2	3	44809000	61590000	55747000	67295000	36598000	63240000	0.816	1.122	1.016	1.226	0.667	1.152	1.401	3.42E-02
O75027	ATP-binding cassette sub-family B member 7, mitochondrial	ABCB7	23.3	82.64	88.633	81	13	13	13	13	13	15	12	15	13	13	13	13	13	13	13	13	13	13	13	13	836270000	676080000	849050000	708030000	831150000	729180000	1.084	0.876	1.1	0.918	1.077	0.945	0.84	1.18E-03
O75044	SLIT-ROBO Rho GTPase-activating protein 2	SRGAP2	8.4	120.88	22.807	11	6	4	1	2	2	1	3	2	4	3	5	5	5	5	2	2	3	3	3	3	70676000	45726000	39846000	52921000	37032000	46791000	1.447	0.936	0.816	1.084	0.758	0.958	0.986	9.52E-01
O75051	Plexin-A2	PLXNA2	6.9	211.1	19.345	18	11	8	4	2	6	2	3	1	8	8	9	7	7	8	6	7	7	6	6	6	170610000	124530000	153630000	147680000	167030000	138500000	1.135	0.828	1.022	0.982	1.111	0.921	0.836	3.40E-02
O75054	Immunoglobulin superfamily member 3	IGSF3	13.7	135.19	86.372	24	10	10	2	4	4	3	5	6	5	6	8	7	9	10	5	6	8	7	9	10	196660000	185460000	197760000	169700000	182740000	207140000	1.036	0.977	1.041	0.894	0.962	1.091	0.974	6.98E-01
O75063	Glycosaminoglycan xylosylkinase	FAM20B	10.3	46.432	9.4671	9	3	3	1	1	1	1	3	2	2	2	2	1	3	2	2	2	2	1	3	2	22540000	20575000	23877000	0	22385000	28144000	0.959	0.875	1.016		0.952	1.197	1.062	7.72E-01
O75083	WD repeat-containing protein 1	WDR1	64.4	66.193	216.37	255	29	29	41	49	39	43	41	42	27	26	26	26	28	26	27	26	26	26	28	26	5395100000	5454100000	4875800000	5475000000	4886700000	5280300000	1.032	1.043	0.933	1.047	0.935	1.01	1.069	1.26E-01
O75113	NEDD4-binding protein 1	N4BP1	4.6	100.38	9.8339	11	3	3	2	2	1	2	1	3	2	2	2	2	2	3	2	2	2	2	2	3	0	33081000	48648000	24098000	30343000	46639000		0.905	1.331	0.659	0.83	1.276	0.876	6.83E-01
O75122	CLIP-associating protein 2	CLASP2	15.1	141.13	57.562	43	14	13	8	6	6	8	8	7	11	11	11	12	13	12	10	10	10	11	12	11	215580000	163850000	205840000	168060000	214060000	175190000	1.132	0.86	1.081	0.883	1.124	0.92	0.798	6.77E-04
O75127	Pentatricopeptide repeat-containing protein 1, mitochondrial	PTCD1	14.7	78.855	12.994	15	6	6	3	3	3	2	2	2	5	5	4	4	5	3	5	5	4	4	5	3	90659000	87428000	77232000	75334000	90373000	72642000	1.102	1.063	0.939	0.916	1.098	0.883	0.911	2.96E-01
O75131	Copine-3	CPNE3	44.9	60.13	80.262	119	20	19	19	22	17	20	19	22	17	19	18	19	18	18	16	18	17	18	17	17	1252300000	2292200000	1300700000	2294200000	1324000000	2521400000	0.684	1.252	0.71	1.253	0.723	1.377	1.833	1.64E-04
O75146	Huntingtin-interacting protein 1-related protein	HIP1R	33.2	119.39	148.57	110	28	26	20	16	19	20	17	18	24	25	23	25	23	24	23	23	21	23	22	22	627560000	561170000	649800000	606120000	697290000	560010000	1.017	0.91	1.053	0.982	1.13	0.908	0.875	3.21E-02
O75150	E3 ubiquitin-protein ligase BRE1B	RNF40	29.5	113.65	96.535	85	24	22	12	15	12	14	13	19	21	20	21	20	19	21	19	18	19	18	17	19	844540000	901370000	753500000	936780000	777860000	1021100000	0.968	1.033	0.864	1.074	0.892	1.17	1.203	2.27E-02
O75151	Lysine-specific demethylase PHF2	PHF2	7.3	120.77	17.996	16	6	5	3	2	2	2	4	3	4	4	5	4	6	4	4	4	5	3	5	3	66337000	92163000	60675000	82317000	69185000	93191000	0.858	1.192	0.785	1.065	0.895	1.205	1.364	5.08E-03
O75152	Zinc finger CCCH domain-containing protein 11A	ZC3H11A	32.1	89.13	114.04	110	19	19	20	19	17	17	20	17	19	18	19	16	19	18	19	18	19	16	19	18	752130000	657260000	664730000	667160000	733460000	616290000	1.103	0.964	0.975	0.978	1.076	0.904	0.903	8.59E-02
O75153	Clustered mitochondria protein homolog	CLUH	31.6	146.67	132.23	142	29	29	21	27	21	25	24	24	25	24	25	27	22	24	25	24	25	27	22	24	878920000	867450000	870720000	900730000	869010000	836700000	1.01	0.996	1	1.035	0.998	0.961	0.995	8.19E-01
O75164	Lysine-specific demethylase 4A	KDM4A	2.5	120.66	5.8372	5	2	2	0	2	1	1	0	1	2	2	2	2	1	2	2	2	2	2	1	2	34418000	35549000	30412000	38360000	0	38326000	0.972	1.004	0.859	1.083		1.082	1.154	7.99E-02
O75165	DnaJ homolog subfamily C member 13	DNAJC13	26.5	254.41	220.07	185	45	45	31	24	38	26	38	28	34	33	39	35	40	36	34	33	39	35	40	36	1194200000	950430000	1190300000	915820000	1314600000	950000000	1.1	0.875	1.096	0.843	1.211	0.875	0.761	2.26E-03
O75175	CCR4-NOT transcription complex subunit 3	CNOT3	11.8	81.871	18.535	33	8	8	4	4	8	5	7	5	4	5	7	7	7	6	4	5	7	7	7	6	226250000	210100000	210120000	244730000	290810000	264450000	0.938	0.872	0.872	1.015	1.206	1.097	0.989	9.33E-01
O75179	Ankyrin repeat domain-containing protein 17	ANKRD17	8	274.25	59.255	34	14	8	4	5	3	11	6	5	7	8	8	11	9	8	5	6	6	7	6	5	195440000	219680000	222470000	209260000	188650000	246650000	0.915	1.028	1.041	0.979	0.883	1.154	1.114	2.04E-01
O75182	Paired amphipathic helix protein Sin3b	SIN3B	10	133.06	109.25	35	8	8	9	7	3	4	7	5	8	8	5	6	6	7	8	8	5	6	6	7	159870000	191630000	137560000	139230000	177050000	147460000	1.007	1.207	0.866	0.877	1.115	0.929	1.008	9.52E-01
O75190	DnaJ homolog subfamily B member 6	DNAJB6	17.2	36.087	9.8551	25	5	4	5	5	4	3	5	3	5	5	5	5	5	5	4	4	4	4	4	4	333300000	375740000	297570000	320560000	336200000	355000000	0.991	1.117	0.885	0.953	0.999	1.055	1.087	2.39E-01
O75208	Ubiquinone biosynthesis protein COQ9, mitochondrial	COQ9	46.2	35.509	75.764	64	8	8	11	8	12	8	12	13	7	6	7	6	7	7	7	6	7	6	7	7	795860000	603210000	719980000	511000000	602260000	565230000	1.257	0.953	1.138	0.807	0.952	0.893	0.793	7.89E-02
O75223	Gamma-glutamylcyclotransferase	GGCT	37.2	21.007	25.866	21	6	6	3	2	4	5	3	4	6	6	6	6	6	6	6	6	6	6	6	6	234250000	234630000	264650000	225390000	283580000	285930000	0.92	0.921	1.039	0.885	1.113	1.122	0.953	6.34E-01
O75251	NADH dehydrogenase [ubiquinone] iron-sulfur protein 7, mitochondrial	NDUFS7	28.2	23.563	32.491	40	5	5	7	6	6	8	7	6	5	5	5	5	5	5	5	5	5	5	5	5	468290000	498570000	448310000	487720000	417340000	428820000	1.022	1.088	0.978	1.064	0.911	0.936	1.061	3.61E-01
O75306	NADH dehydrogenase [ubiquinone] iron-sulfur protein 2, mitochondrial	NDUFS2	64.6	52.545	196.4	209	21	21	34	34	35	38	35	33	21	21	21	20	20	18	21	21	21	20	20	18	2436400000	2405900000	2513700000	2374400000	2576700000	2281800000	1.002	0.989	1.034	0.977	1.06	0.938	0.938	4.82E-02
O75312	Zinc finger protein ZPR1	ZPR1	39.2	50.925	108.84	59	13	13	9	10	9	10	8	13	12	11	13	11	11	12	12	11	13	11	11	12	364210000	417290000	382600000	412040000	383820000	433180000	0.913	1.046	0.959	1.033	0.962	1.086	1.117	8.06E-03
O75319	RNA/RNP complex-1-interacting phosphatase	DUSP11	16.1	38.938	11.204	20	5	5	4	2	3	5	3	3	4	3	4	5	4	4	4	3	4	5	4	4	3785700000	5136700000	4290400000	6319600000	4249800000	5887900000	0.766	1.039	0.868	1.278	0.859	1.191	1.407	1.18E-02
O75323	Protein NipSnap homolog 2	GBAS	22.7	33.742	13.522	35	6	5	8	6	7	4	5	5	6	5	6	5	6	6	5	4	5	4	5	5	858720000	769940000	895480000	836200000	805690000	856280000	1.026	0.92	1.07	0.999	0.963	1.023	0.962	4.28E-01
O75330	Hyaluronan mediated motility receptor	HMMR	11	84.099	18.969	8	5	5	1	2	1	2	0	2	5	3	4	4	4	4	5	3	4	4	4	4	85490000	91453000	57051000	177520000	74780000	110910000	0.859	0.919	0.573	1.784	0.751	1.114	1.748	1.19E-01
O75340	Programmed cell death protein 6	PDCD6	21.5	21.868	10.554	26	4	4	5	4	3	4	6	4	4	3	4	3	4	3	4	3	4	3	4	3	138840000	186610000	148470000	186750000	166100000	153850000	0.85	1.142	0.908	1.143	1.016	0.941	1.163	1.44E-01
O75347	Tubulin-specific chaperone A	TBCA	46.3	12.855	39.133	50	6	6	9	8	8	9	7	9	6	6	6	6	6	6	6	6	6	6	6	6	979890000	1099700000	942200000	1097800000	1011200000	1060300000	0.95	1.066	0.913	1.064	0.98	1.028	1.111	1.03E-02
O75348	V-type proton ATPase subunit G 1	ATP6V1G1	55.9	13.757	34.624	22	5	5	2	4	2	6	3	5	4	3	4	4	5	4	4	3	4	4	5	4	290500000	302270000	255520000	332430000	266580000	324410000	0.984	1.024	0.865	1.126	0.903	1.099	1.18	2.35E-02
O75351	Vacuolar protein sorting-associated protein 4B	VPS4B	35.4	49.301	30.46	28	11	7	4	4	7	6	4	3	9	10	11	9	10	9	5	7	7	7	6	6	334940000	340180000	280290000	348750000	282990000	354650000	1.035	1.051	0.866	1.078	0.874	1.096	1.162	5.69E-02
O75352	Mannose-P-dolichol utilization defect 1 protein	MPDU1	21.1	26.638	7.0708	18	4	4	4	3	3	3	3	2	4	4	4	4	4	3	4	4	4	4	4	3	373830000	377210000	411570000	382350000	389400000	376040000	0.971	0.98	1.069	0.993	1.011	0.977	0.967	3.05E-01
O75362	Zinc finger protein 217	ZNF217	4.8	115.27	11.583	12	4	3	2	3	3	0	3	1	4	3	4	3	4	3	3	3	3	3	3	3	40845000	31840000	31633000	31080000	53110000	34831000	1.097	0.855	0.85	0.835	1.427	0.936	0.778	2.16E-01
O75367	Core histone macro-H2A.1	H2AFY	57.5	39.617	94.117	158	17	17	28	26	26	24	29	25	16	15	15	17	16	17	16	15	15	17	16	17	2883500000	3037300000	3213600000	3068900000	2955100000	3137100000	0.946	0.996	1.054	1.006	0.969	1.029	1.021	5.75E-01
O75368	SH3 domain-binding glutamic acid-rich-like protein	SH3BGRL	30.7	12.774	7.8701	15	3	3	2	3	2	3	3	2	2	3	3	3	3	3	2	3	3	3	3	3	77915000	100330000	81170000	102470000	85978000	82559000	0.881	1.135	0.918	1.159	0.973	0.934	1.164	1.17E-01
O75369	Filamin-B	FLNB	70.1	278.16	323.31	1216	133	119	186	212	190	224	188	216	127	127	128	130	125	127	113	113	114	116	111	113	31238000000	31952000000	30726000000	32567000000	30971000000	33965000000	0.979	1.002	0.963	1.021	0.971	1.065	1.06	3.94E-02
O75376	Nuclear receptor corepressor 1	NCOR1	11.7	270.21	136.96	61	20	19	11	8	11	10	11	10	16	17	16	17	18	16	15	16	15	16	17	15	410480000	426290000	405310000	414660000	397320000	477570000	0.973	1.01	0.961	0.983	0.942	1.132	1.087	1.49E-01
O75379	Vesicle-associated membrane protein 4	VAMP4	31.9	16.397	24.35	6	3	3	0	2	1	1	1	1	0	2	3	1	3	2	0	2	3	1	3	2	0	76641000	88095000	0	99243000	0		0.871	1.001		1.128		0.818
O75380	NADH dehydrogenase [ubiquinone] iron-sulfur protein 6, mitochondrial	NDUFS6	46.8	13.711	71.379	37	4	4	7	7	6	7	5	5	4	4	4	4	4	4	4	4	4	4	4	4	707710000	488650000	773180000	741540000	792420000	586730000	1.038	0.717	1.134	1.088	1.162	0.861	0.799	1.23E-01
O75381	Peroxisomal membrane protein PEX14	PEX14	32.6	41.236	63.79	51	8	8	9	9	8	10	8	7	8	6	6	5	5	6	8	6	6	5	5	6	612520000	450900000	588390000	466200000	612820000	572380000	1.113	0.819	1.069	0.847	1.113	1.04	0.821	5.04E-02
O75390	Citrate synthase, mitochondrial	CS	52.8	51.712	96.653	212	18	18	39	35	39	31	35	33	18	18	18	17	16	17	18	18	18	17	16	17	9963400000	10013000000	10370000000	10257000000	10743000000	10553000000	0.966	0.971	1.005	0.994	1.041	1.023	0.992	7.73E-01
O75394	39S ribosomal protein L33, mitochondrial	MRPL33	16.9	7.6191	5.4666	13	1	1	2	2	3	2	2	2	1	1	1	1	1	1	1	1	1	1	1	1	113160000	144380000	108420000	121980000	154040000	138040000	0.87	1.111	0.834	0.938	1.185	1.062	1.077	5.80E-01
O75396	Vesicle-trafficking protein SEC22b	SEC22B	51.6	24.593	111.61	100	11	11	13	18	17	17	16	19	10	11	11	11	11	11	10	11	11	11	11	11	3613500000	3293700000	3756300000	3222800000	3841600000	3580100000	1.018	0.927	1.058	0.907	1.082	1.008	0.901	4.39E-02
O75400	Pre-mRNA-processing factor 40 homolog A	PRPF40A	26.3	108.8	127.92	149	21	21	26	24	23	28	24	24	20	17	18	17	19	18	20	17	18	17	19	18	1965200000	1954200000	1990400000	1860600000	2021900000	1787600000	1.018	1.013	1.031	0.964	1.048	0.926	0.937	7.01E-02
O75410	Transforming acidic coiled-coil-containing protein 1	TACC1	35.9	87.793	137.48	107	21	20	25	15	16	15	22	14	19	16	19	16	19	16	18	16	18	16	19	16	602570000	549320000	556990000	493020000	597430000	496140000	1.097	1	1.014	0.898	1.088	0.903	0.876	3.52E-02
O75414	Nucleoside diphosphate kinase 6	NME6	24.2	21.142	10.013	12	4	4	3	1	3	1	2	2	4	4	4	4	3	4	4	4	4	4	3	4	63728000	48542000	52699000	53498000	85620000	48747000	1.084	0.825	0.896	0.91	1.456	0.829	0.746	1.56E-01
O75427	Leucine-rich repeat and calponin homology domain-containing protein 4	LRCH4	18.6	73.449	40.873	30	8	8	4	6	6	5	5	4	6	7	6	6	6	7	6	7	6	6	6	7	119760000	151510000	128500000	121310000	111180000	120540000	0.955	1.208	1.024	0.967	0.886	0.961	1.094	3.76E-01
O75431	Metaxin-2	MTX2	64.3	29.763	140.43	90	10	10	16	15	13	13	16	17	9	9	9	9	9	10	9	9	9	9	9	10	1545900000	1462500000	1305300000	1274800000	1493300000	1417600000	1.091	1.032	0.921	0.9	1.054	1.001	0.956	5.32E-01
O75436	Vacuolar protein sorting-associated protein 26A	VPS26A	41.3	38.169	49.327	69	11	10	11	13	10	12	11	12	9	11	9	11	10	10	9	10	9	10	9	9	760950000	887690000	844600000	928410000	849180000	946040000	0.875	1.021	0.971	1.068	0.977	1.088	1.125	3.76E-02
O75438	NADH dehydrogenase [ubiquinone] 1 beta subcomplex subunit 1	NDUFB1	34.5	6.9611	6.3023	15	3	3	1	3	3	3	2	3	3	3	3	3	3	3	3	3	3	3	3	3	233500000	195410000	187790000	188290000	218800000	209480000	1.136	0.951	0.914	0.916	1.064	1.019	0.927	3.52E-01
O75439	Mitochondrial-processing peptidase subunit beta	PMPCB	56	54.366	181.52	158	23	22	28	30	25	24	26	25	22	21	21	22	19	22	21	20	20	21	18	21	5017900000	4435500000	4944000000	4380200000	4932600000	4346800000	1.073	0.949	1.057	0.937	1.055	0.93	0.884	1.00E-04
O75446	Histone deacetylase complex subunit SAP30	SAP30	9.5	23.306	4.5893	10	2	2	2	3	2	1	1	1	2	2	2	2	2	2	2	2	2	2	2	2	40897000	33882000	42099000	38128000	0	33668000	1.084	0.898	1.116	1.01		0.892	0.849	4.74E-02
O75448	Mediator of RNA polymerase II transcription subunit 24	MED24	11.4	110.3	27.437	32	9	9	5	4	6	5	6	6	8	7	9	7	9	8	8	7	9	7	9	8	206700000	170480000	175990000	201030000	209710000	181430000	1.083	0.893	0.922	1.053	1.099	0.95	0.933	4.01E-01
O75449	Katanin p60 ATPase-containing subunit A1	KATNA1	13.6	55.964	16.827	17	5	5	2	3	2	5	2	3	3	4	4	4	4	3	3	4	4	4	4	3	36350000	44146000	28367000	45464000	32577000	35140000	0.982	1.193	0.767	1.229	0.88	0.95	1.282	8.30E-02
O75475	PC4 and SFRS1-interacting protein	PSIP1	27.4	60.103	33.261	72	14	13	13	12	11	11	13	12	14	14	13	13	13	12	13	13	12	12	12	11	818620000	707320000	879640000	849960000	945500000	904430000	0.962	0.831	1.034	0.999	1.111	1.063	0.931	4.30E-01
O75477	Erlin-1	ERLIN1	48.6	38.925	121.3	123	16	13	19	22	22	21	20	19	15	16	16	15	15	15	12	13	13	12	12	12	3077800000	2802500000	3322400000	2839600000	3138500000	2809300000	1.026	0.935	1.108	0.947	1.047	0.937	0.886	3.97E-02
O75489	NADH dehydrogenase [ubiquinone] iron-sulfur protein 3, mitochondrial	NDUFS3	58.3	30.241	97.251	135	14	14	20	24	19	25	21	26	14	14	14	14	14	14	14	14	14	14	14	14	2910800000	2675000000	3151300000	2666200000	3072000000	2707600000	1.016	0.934	1.1	0.931	1.073	0.945	0.881	7.32E-03
O75494	Serine/arginine-rich splicing factor 10	SRSF10	31.3	31.3	28.707	52	8	8	7	9	11	10	6	9	6	7	8	7	7	8	6	7	8	7	7	8	1038100000	1020800000	1205900000	1156600000	1049300000	1191800000	0.935	0.919	1.086	1.042	0.945	1.073	1.023	7.53E-01
O75503	Ceroid-lipofuscinosis neuronal protein 5	CLN5	22.6	41.496	12.315	35	7	7	6	6	7	5	5	6	7	7	7	7	7	7	7	7	7	7	7	7	299580000	281380000	284970000	250040000	298180000	258300000	1.075	1.009	1.022	0.897	1.07	0.927	0.895	4.15E-02
O75506	Heat shock factor-binding protein 1	HSBP1	72.4	8.5435	114.49	51	4	4	8	10	8	8	9	8	4	4	4	4	4	4	4	4	4	4	4	4	1010800000	1285400000	1014700000	1484400000	846570000	1312700000	0.872	1.109	0.875	1.281	0.73	1.133	1.421	8.40E-03
O75521	Enoyl-CoA delta isomerase 2, mitochondrial	ECI2	39.1	43.585	91.66	84	11	11	15	15	12	14	14	14	11	10	11	11	11	10	11	10	11	11	11	10	1021500000	806180000	1044900000	856900000	977430000	967410000	1.08	0.852	1.105	0.906	1.034	1.023	0.864	5.56E-02
O75528	Transcriptional adapter 3	TADA3	18.1	48.902	38.544	22	5	5	4	2	4	3	5	4	3	4	4	3	5	3	3	4	4	3	5	3	68740000	55727000	66352000	62905000	68717000	71229000	1.048	0.849	1.011	0.959	1.047	1.086	0.932	3.65E-01
O75530	Polycomb protein EED	EED	33.8	50.197	41.259	67	13	13	11	9	14	12	14	7	11	11	12	12	13	12	11	11	12	12	13	12	314890000	285940000	278840000	275030000	317490000	339850000	1.043	0.947	0.923	0.911	1.051	1.125	0.989	8.90E-01
O75531	Barrier-to-autointegration factor	BANF1	64	10.058	16.91	53	6	6	7	8	9	10	9	10	5	5	6	6	6	5	5	5	6	6	6	5	1687300000	1542500000	1417100000	1275600000	1718200000	1468200000	1.111	1.016	0.933	0.84	1.132	0.967	0.889	2.24E-01
O75533	Splicing factor 3B subunit 1	SF3B1	61.6	145.83	323.31	563	62	62	83	104	85	105	91	95	59	58	59	60	58	60	59	58	59	60	58	60	12114000000	12910000000	12048000000	12590000000	11744000000	12427000000	0.984	1.049	0.979	1.023	0.954	1.01	1.056	2.08E-02
O75534	Cold shock domain-containing protein E1	CSDE1	51.9	88.884	259.07	274	38	38	43	55	41	48	39	48	36	36	35	36	36	36	36	36	35	36	36	36	5375900000	5682600000	5392700000	5521500000	5218600000	5731200000	0.98	1.036	0.983	1.006	0.951	1.044	1.059	1.99E-02
O75554	WW domain-binding protein 4	WBP4	7.4	42.506	2.4867	5	2	2	1	0	0	1	2	1	2	1	2	2	2	2	2	1	2	2	2	2	79342000	0	77135000	80551000	72042000	69876000	1.047		1.018	1.063	0.951	0.922	0.987	8.56E-01
O75569	Interferon-inducible double-stranded RNA-dependent protein kinase activator A	PRKRA	38.7	34.404	68.845	61	9	9	9	12	7	12	12	9	8	8	9	8	8	8	8	8	9	8	8	8	440880000	477810000	488800000	516150000	412490000	498530000	0.933	1.011	1.035	1.093	0.873	1.055	1.112	1.14E-01
O75586	Mediator of RNA polymerase II transcription subunit 6	MED6	30.1	28.424	20.648	14	6	6	3	2	1	1	3	4	5	3	4	3	6	5	5	3	4	3	6	5	64329000	94829000	84945000	92544000	75139000	77933000	0.788	1.162	1.041	1.134	0.921	0.955	1.182	1.62E-01
O75600	2-amino-3-ketobutyrate coenzyme A ligase, mitochondrial	GCAT	23.9	45.285	33.572	39	6	6	5	7	8	5	7	7	4	5	5	4	5	6	4	5	5	4	5	6	209390000	199470000	260660000	200860000	259690000	186780000	0.954	0.909	1.188	0.915	1.183	0.851	0.805	5.33E-02
O75607	Nucleoplasmin-3	NPM3	60.1	19.343	156.82	68	6	6	10	12	10	13	12	11	6	6	6	5	6	5	6	6	6	5	6	5	1611900000	1579500000	1873600000	1559700000	1592800000	1591400000	0.986	0.966	1.146	0.954	0.974	0.973	0.932	3.31E-01
O75608	Acyl-protein thioesterase 1	LYPLA1	44.3	24.669	53.793	32	6	6	5	5	6	6	4	6	6	6	6	6	6	6	6	6	6	6	6	6	560640000	591360000	562610000	587380000	529740000	562570000	0.991	1.045	0.995	1.038	0.936	0.994	1.053	1.02E-01
O75616	GTPase Era, mitochondrial	ERAL1	50.3	48.349	92.59	100	15	15	13	15	14	20	17	21	12	13	12	13	14	12	12	13	12	13	14	12	821730000	781250000	893210000	868190000	825960000	836740000	0.981	0.932	1.066	1.036	0.986	0.999	0.978	6.24E-01
O75643	U5 small nuclear ribonucleoprotein 200 kDa helicase	SNRNP200	62.7	244.5	323.31	1025	107	107	165	178	165	179	162	176	104	103	102	101	103	100	104	103	102	101	103	100	20886000000	22018000000	21513000000	22285000000	21415000000	23313000000	0.953	1.005	0.982	1.017	0.978	1.064	1.06	4.51E-02
O75663	TIP41-like protein	TIPRL	53.3	31.444	55.14	61	11	11	8	11	9	12	10	11	11	11	11	11	11	11	11	11	11	11	11	11	492090000	480820000	494770000	451760000	465190000	473770000	1.033	1.009	1.039	0.948	0.976	0.994	0.969	3.02E-01
O75674	TOM1-like protein 1	TOM1L1	17.2	52.988	16.124	15	5	5	4	1	2	3	2	3	4	4	3	4	4	3	4	4	3	4	4	3	68273000	84218000	45765000	70489000	55861000	93178000	0.981	1.209	0.657	1.012	0.802	1.338	1.459	4.86E-02
O75683	Surfeit locus protein 6	SURF6	32.4	41.45	83.732	60	9	9	12	8	10	10	10	10	9	8	9	8	8	7	9	8	9	8	8	7	534660000	417290000	556330000	505510000	480810000	455400000	1.087	0.849	1.132	1.028	0.978	0.926	0.877	1.31E-01
O75691	Small subunit processome component 20 homolog	UTP20	30.9	318.38	282.12	321	66	66	52	54	59	51	57	48	53	54	57	55	58	57	53	54	57	55	58	57	3247100000	2888000000	3188900000	3061900000	3361900000	2772700000	1.052	0.936	1.033	0.992	1.089	0.898	0.89	2.18E-02
O75694	Nuclear pore complex protein Nup155	NUP155	43.8	155.2	323.31	341	45	45	59	56	61	56	51	58	44	40	41	40	39	43	44	40	41	40	39	43	5181800000	4674000000	5095900000	4571400000	5155100000	4495700000	1.066	0.961	1.048	0.94	1.06	0.925	0.89	6.04E-04
O75695	Protein XRP2	RP2	20.6	39.641	21.056	39	8	8	6	5	8	5	8	7	7	7	8	7	7	7	7	7	8	7	7	7	257270000	258140000	285890000	268530000	268480000	292900000	0.946	0.95	1.052	0.988	0.988	1.077	1.01	8.52E-01
O75717	WD repeat and HMG-box DNA-binding protein 1	WDHD1	18.2	125.97	45.535	36	14	14	5	4	4	5	10	8	8	6	10	7	10	10	8	6	10	7	10	10	207020000	226310000	216170000	234310000	204450000	234130000	0.939	1.027	0.981	1.063	0.928	1.062	1.107	7.22E-03
O75718	Cartilage-associated protein	CRTAP	40.9	46.561	24.669	73	15	14	17	11	12	11	9	13	15	13	12	15	13	14	14	13	11	14	12	13	802750000	656740000	758170000	658330000	783070000	644060000	1.119	0.916	1.057	0.918	1.092	0.898	0.836	7.19E-04
O75746	Calcium-binding mitochondrial carrier protein Aralar1	SLC25A12	44.5	74.761	123.18	149	26	20	26	23	24	25	26	25	25	23	26	25	26	25	19	17	20	19	20	19	1605400000	1499600000	1710900000	1562100000	1650900000	1476300000	1.013	0.947	1.08	0.986	1.042	0.932	0.914	2.30E-02
O75787	Renin receptor	ATP6AP2	18.6	39.008	38.106	31	6	6	5	5	6	5	5	5	6	6	6	6	6	6	6	6	6	6	6	6	297260000	261280000	286110000	320530000	289940000	292330000	1.021	0.897	0.982	1.101	0.996	1.004	1.001	9.88E-01
O75792	Ribonuclease H2 subunit A	RNASEH2A	23.7	33.395	10.345	11	5	5	2	1	2	1	3	2	3	3	3	3	5	2	3	3	3	3	5	2	105490000	105760000	101090000	117840000	105650000	93911000	1.005	1.008	0.963	1.123	1.007	0.895	1.017	8.16E-01
O75794	Cell division cycle protein 123 homolog	CDC123	26.2	39.134	12.071	30	8	8	7	3	4	5	5	6	7	6	6	6	7	7	7	6	6	6	7	7	141280000	150230000	157130000	166900000	121550000	137820000	0.969	1.03	1.078	1.145	0.834	0.945	1.083	4.30E-01
O75817	Ribonuclease P protein subunit p20	POP7	23.6	15.651	9.7608	13	3	3	2	2	2	2	3	2	2	2	2	2	3	2	2	2	2	2	3	2	73038000	58174000	80947000	70311000	79249000	55439000	1.051	0.837	1.164	1.011	1.14	0.797	0.789	3.34E-02
O75818	Ribonuclease P protein subunit p40	RPP40	33.1	41.833	42.457	20	7	7	5	3	3	3	4	2	5	5	4	7	6	7	5	5	4	7	6	7	188970000	211960000	170620000	258840000	214590000	208530000	0.905	1.015	0.817	1.239	1.027	0.998	1.183	1.65E-01
O75821	Eukaryotic translation initiation factor 3 subunit G	EIF3G	60.6	35.611	165.88	146	19	19	23	25	23	22	26	27	17	17	16	16	17	16	17	17	16	16	17	16	2646500000	3324800000	2674900000	3172600000	2520700000	3129900000	0.909	1.142	0.919	1.09	0.866	1.075	1.228	1.42E-03
O75822	Eukaryotic translation initiation factor 3 subunit J	EIF3J	41.9	29.062	75.096	81	11	11	14	16	11	15	13	12	11	11	11	11	11	10	11	11	11	11	11	10	845530000	1133200000	875560000	1144600000	912140000	1278200000	0.82	1.099	0.849	1.11	0.884	1.239	1.35	3.64E-03
O75828	Carbonyl reductase [NADPH] 3	CBR3	31.8	30.85	19.837	11	7	5	2	2	1	1	2	3	7	6	6	6	6	7	5	4	4	4	4	5	54588000	87124000	73640000	74709000	0	70956000	0.756	1.207	1.02	1.035		0.983	1.21	2.51E-01
O75832	26S proteasome non-ATPase regulatory subunit 10	PSMD10	40.3	24.428	25.63	24	6	6	3	3	3	7	3	5	5	5	4	6	5	5	5	5	4	6	5	5	205070000	233000000	204570000	194930000	197380000	264820000	0.947	1.076	0.944	0.9	0.911	1.222	1.141	2.95E-01
O75843	AP-1 complex subunit gamma-like 2	AP1G2	15	87.116	48.374	49	9	9	7	7	9	7	9	10	8	8	8	8	9	9	8	8	8	8	9	9	236990000	238540000	257640000	249840000	252710000	260290000	0.95	0.957	1.033	1.002	1.014	1.044	1.002	9.62E-01
O75844	CAAX prenyl protease 1 homolog	ZMPSTE24	24.8	54.812	44.6	112	10	10	20	18	19	16	19	20	10	10	10	10	10	10	10	10	10	10	10	10	2279000000	2309200000	2572700000	2433600000	2420000000	2331000000	0.953	0.966	1.076	1.018	1.012	0.975	0.973	5.18E-01
O75874	Isocitrate dehydrogenase [NADP] cytoplasmic	IDH1	54.1	46.659	102.73	89	18	17	15	18	13	18	14	11	18	18	18	18	17	17	17	17	17	17	16	16	1258800000	1367600000	1305600000	1299800000	1298600000	1297900000	0.965	1.048	1.001	0.996	0.995	0.995	1.026	2.78E-01
O75880	Protein SCO1 homolog, mitochondrial	SCO1	21.9	33.814	40.098	70	8	8	11	12	14	11	15	7	8	8	8	8	8	8	8	8	8	8	8	8	938340000	816440000	1031000000	752130000	1034500000	866780000	1.035	0.901	1.137	0.83	1.141	0.956	0.811	1.43E-02
O75882	Attractin	ATRN	6.3	158.54	14.893	15	7	7	3	3	3	2	1	3	5	5	6	5	4	5	5	5	6	5	4	5	94037000	66163000	82865000	58011000	76629000	72987000	1.252	0.881	1.103	0.772	1.02	0.972	0.778	4.82E-02
O75909	Cyclin-K	CCNK	20.5	64.239	55.021	53	8	8	10	11	10	6	8	8	8	8	8	8	8	8	8	8	8	8	8	8	331160000	406820000	299990000	376180000	317410000	359640000	0.95	1.167	0.861	1.079	0.911	1.032	1.205	1.72E-02
O75915	PRA1 family protein 3	ARL6IP5	28.2	21.614	29.815	41	5	5	6	8	6	6	6	9	5	5	5	5	5	5	5	5	5	5	5	5	1648000000	1681800000	1500400000	1718300000	1872100000	1586700000	0.988	1.008	0.9	1.03	1.122	0.951	0.993	9.27E-01
O75934	Pre-mRNA-splicing factor SPF27	BCAS2	80	26.131	140.77	119	14	14	22	17	20	20	19	21	14	14	14	14	14	13	14	14	14	14	14	13	1754900000	1689300000	1676800000	1735900000	1842600000	1824300000	1.001	0.963	0.956	0.99	1.051	1.04	0.995	9.01E-01
O75935	Dynactin subunit 3	DCTN3	19.4	21.119	9.3555	19	4	4	3	4	4	3	3	2	4	4	4	4	4	3	4	4	4	4	4	3	162940000	161310000	151570000	161840000	187900000	154090000	0.998	0.988	0.928	0.991	1.151	0.944	0.95	4.89E-01
O75937	DnaJ homolog subfamily C member 8	DNAJC8	45.5	29.841	50.829	51	10	10	6	13	5	10	8	9	9	10	8	9	9	9	9	10	8	9	9	9	597920000	624170000	592520000	731720000	647110000	678810000	0.926	0.967	0.918	1.134	1.003	1.052	1.107	1.38E-01
O75940	Survival of motor neuron-related-splicing factor 30	SMNDC1	41.2	26.711	75.998	43	6	6	8	8	7	7	5	8	6	6	6	6	6	6	6	6	6	6	6	6	475870000	516890000	441410000	539380000	507380000	522130000	0.951	1.033	0.882	1.078	1.014	1.043	1.108	6.44E-02
O75947	ATP synthase subunit d, mitochondrial	ATP5H	72	18.491	42.115	113	12	12	20	16	21	16	20	20	11	11	11	11	12	11	11	11	11	11	12	11	4116200000	3776100000	4146300000	4266100000	4716100000	4183700000	0.98	0.899	0.987	1.016	1.123	0.996	0.942	3.67E-01
O75955	Flotillin-1	FLOT1	61.1	47.355	137.14	129	21	21	24	18	25	20	22	20	20	17	21	19	21	19	20	17	21	19	21	19	2671500000	2600300000	2673900000	2435400000	2572800000	2512900000	1.036	1.009	1.037	0.945	0.998	0.975	0.953	1.01E-01
O75962	Triple functional domain protein	TRIO	6.2	346.9	49.069	20	12	12	4	2	4	4	5	1	9	6	9	9	9	6	9	6	9	9	9	6	158620000	167480000	158820000	142230000	177180000	139740000	1.008	1.064	1.009	0.904	1.126	0.888	0.909	2.35E-01
O75964	ATP synthase subunit g, mitochondrial	ATP5L	47.6	11.428	37.265	64	6	6	10	12	9	11	11	11	6	5	6	6	5	6	6	5	6	6	5	6	1368400000	1544100000	1607200000	1628500000	1568000000	1536100000	0.887	1.001	1.042	1.056	1.017	0.996	1.036	5.28E-01
O75976	Carboxypeptidase D	CPD	23.7	152.93	105.56	116	22	22	22	19	20	17	20	18	21	19	20	21	22	21	21	19	20	21	22	21	926840000	746220000	898870000	709390000	974170000	702010000	1.122	0.903	1.088	0.859	1.179	0.85	0.771	1.16E-03
O76003	Glutaredoxin-3	GLRX3	42.7	37.432	114.04	82	10	10	12	15	14	15	14	12	10	10	10	10	10	10	10	10	10	10	10	10	1352400000	1500200000	1269200000	1533500000	1175400000	1467100000	0.978	1.085	0.918	1.109	0.85	1.061	1.185	1.27E-02
O76021	Ribosomal L1 domain-containing protein 1	RSL1D1	45.7	54.972	130.25	193	23	23	33	30	34	31	34	31	22	21	22	22	23	23	22	21	22	22	23	23	6187800000	5518300000	6573900000	5491200000	6284800000	5540100000	1.043	0.93	1.108	0.926	1.059	0.934	0.869	1.91E-02
O76024	Wolframin	WFS1	13.8	100.29	35.997	63	9	9	10	12	10	10	11	10	9	8	8	8	9	7	9	8	8	8	9	7	278550000	273860000	322030000	256680000	246660000	264020000	1.018	1.001	1.177	0.938	0.901	0.965	0.938	4.77E-01
O76027	Annexin A9	ANXA9	10.4	38.363	7.087	13	3	3	3	2	3	2	2	1	3	2	2	2	2	1	3	2	2	2	2	1	0	23123000	33310000	27243000	28556000	0		0.824	1.187	0.971	1.018		0.814	2.09E-01
O76031	ATP-dependent Clp protease ATP-binding subunit clpX-like, mitochondrial	CLPX	47.6	69.223	67.058	121	25	25	18	20	23	20	22	18	24	23	25	23	24	23	24	23	25	23	24	23	1735300000	1628000000	1770300000	1636100000	1802800000	1776800000	1.006	0.944	1.026	0.949	1.045	1.03	0.95	1.62E-01
O76070	Gamma-synuclein	SNCG	53.5	13.331	22.899	20	5	5	2	3	4	3	4	4	4	3	5	3	5	4	4	3	5	3	5	4	156090000	203990000	200540000	164200000	168250000	192250000	0.863	1.128	1.109	0.908	0.93	1.063	1.068	5.41E-01
O76071	Probable cytosolic iron-sulfur protein assembly protein CIAO1	CIAO1	57.8	37.84	89.13	71	12	12	11	12	13	12	12	11	12	12	12	12	12	12	12	12	12	12	12	12	627230000	522700000	612640000	660260000	619480000	623550000	1.027	0.856	1.003	1.081	1.014	1.021	0.972	7.12E-01
O76081	Regulator of G-protein signaling 20	RGS20	9	43.691	6.0528	11	2	2	2	2	2	2	1	2	2	2	2	2	1	2	2	2	2	2	1	2	0	32648000	25718000	29438000	0	25165000		1.156	0.911	1.042		0.891	1.131
O76094	Signal recognition particle subunit SRP72	SRP72	49.9	74.605	194.44	177	27	27	28	36	24	32	29	28	26	24	24	24	25	24	26	24	24	24	25	24	2139400000	2205700000	2084200000	2169900000	2184000000	2219300000	0.987	1.018	0.962	1.001	1.008	1.024	1.029	1.26E-01
O94760	N(G),N(G)-dimethylarginine dimethylaminohydrolase 1	DDAH1	54	31.121	68.069	70	14	13	8	15	8	15	9	15	13	12	12	13	13	12	12	11	11	13	12	12	558670000	675660000	597100000	696320000	572370000	632780000	0.898	1.086	0.96	1.119	0.92	1.017	1.16	1.34E-02
O94762	ATP-dependent DNA helicase Q5	RECQL5	12.3	108.86	26.456	21	8	8	3	4	2	3	5	4	5	6	5	4	5	5	5	6	5	4	5	5	86611000	76466000	77732000	92229000	94343000	90821000	1.003	0.885	0.9	1.068	1.092	1.052	1.003	9.70E-01
O94766	Galactosylgalactosylxylosylprotein 3-beta-glucuronosyltransferase 3	B3GAT3	34.3	37.121	57.739	26	8	8	5	4	5	3	4	5	4	4	6	5	6	6	4	4	6	5	6	6	154470000	143170000	144270000	141830000	150160000	154470000	1.043	0.967	0.974	0.958	1.014	1.043	0.979	5.62E-01
O94776	Metastasis-associated protein MTA2	MTA2	52.4	75.022	121.11	178	30	26	30	30	28	26	25	39	26	25	27	26	26	29	22	23	24	23	22	26	2094400000	2161900000	2272000000	2216100000	2191700000	2174600000	0.958	0.989	1.04	1.014	1.003	0.995	0.999	9.75E-01
O94804	Serine/threonine-protein kinase 10	STK10	18.1	112.13	86.183	39	14	12	8	6	7	8	6	4	12	11	12	13	13	12	10	9	10	11	11	10	245100000	240400000	268490000	255270000	277780000	264470000	0.948	0.93	1.038	0.987	1.074	1.023	0.961	4.34E-01
O94822	E3 ubiquitin-protein ligase listerin	LTN1	12.7	200.55	59.431	50	15	15	9	8	9	6	8	10	10	10	9	11	11	11	10	10	9	11	11	11	263560000	290120000	268970000	334320000	281220000	293910000	0.913	1.005	0.932	1.158	0.974	1.018	1.129	8.18E-02
O94826	Mitochondrial import receptor subunit TOM70	TOMM70	67.9	67.454	292.2	302	31	31	50	52	52	51	51	46	31	30	31	29	30	30	31	30	31	29	30	30	9326000000	9101800000	9493900000	9099400000	9448300000	9834200000	0.994	0.97	1.012	0.97	1.007	1.048	0.992	7.71E-01
O94832	Unconventional myosin-Id	MYO1D	40.5	116.2	112.68	127	36	34	11	33	8	33	12	30	26	34	25	33	28	32	25	32	23	31	26	30	781760000	1408100000	763250000	1437600000	810260000	1523300000	0.698	1.256	0.681	1.283	0.723	1.359	1.855	5.76E-05
O94842	TOX high mobility group box family member 4	TOX4	10.1	66.194	22.072	25	5	5	4	5	5	3	5	3	4	5	4	4	5	4	4	5	4	4	5	4	160320000	155520000	140770000	136190000	150460000	143940000	1.084	1.052	0.952	0.921	1.018	0.973	0.965	5.42E-01
O94851	Protein-methionine sulfoxide oxidase MICAL2	MICAL2	13.8	126.69	44.446	39	12	11	8	5	7	6	8	5	9	7	9	8	10	6	8	6	8	7	9	5	211470000	178380000	208240000	198200000	211500000	204540000	1.047	0.883	1.031	0.981	1.047	1.012	0.921	1.71E-01
O94864	STAGA complex 65 subunit gamma	SUPT7L	7.7	46.192	18.852	7	2	2	1	1	1	2	1	1	1	1	1	2	2	1	1	1	1	2	2	1	0	0	0	22210000	31921000	0				0.821	1.179		0.696
O94874	E3 UFM1-protein ligase 1	UFL1	45.2	89.594	199.18	240	34	33	42	36	39	40	42	41	32	32	32	32	32	33	31	31	31	31	31	32	3072300000	3090300000	3069200000	3179500000	3160000000	3129000000	0.986	0.992	0.985	1.02	1.014	1.004	1.01	4.57E-01
O94887	FERM, RhoGEF and pleckstrin domain-containing protein 2	FARP2	8.5	119.89	14.112	20	5	5	2	2	5	4	3	4	4	5	5	5	4	5	4	5	5	5	4	5	142330000	161360000	157660000	142940000	160260000	215080000	0.872	0.988	0.966	0.875	0.982	1.317	1.128	4.28E-01
O94888	UBX domain-containing protein 7	UBXN7	26	54.862	40.795	35	9	9	5	7	9	3	5	6	7	9	8	6	7	8	7	9	8	6	7	8	178040000	192440000	164200000	187380000	168440000	220720000	0.961	1.039	0.887	1.012	0.909	1.192	1.176	5.49E-02
O94901	SUN domain-containing protein 1	SUN1	47.4	90.063	217.67	196	27	27	34	26	36	34	37	29	24	27	25	24	27	26	24	27	25	24	27	26	2168200000	1746000000	2127900000	1895800000	2168300000	1849800000	1.088	0.876	1.068	0.951	1.088	0.928	0.85	2.18E-03
O94903	Proline synthase co-transcribed bacterial homolog protein	PROSC	13.5	30.344	20.328	13	3	3	2	1	2	2	2	4	3	3	3	3	3	3	3	3	3	3	3	3	66569000	54258000	51182000	64466000	78855000	54342000	1.08	0.881	0.831	1.046	1.28	0.882	0.88	4.18E-01
O94905	Erlin-2	ERLIN2	54	37.839	40.92	76	15	12	12	14	10	15	14	11	13	14	13	15	14	13	10	11	10	12	11	10	1352700000	1308300000	1410300000	1253000000	1341300000	1371000000	1.01	0.977	1.053	0.935	1.001	1.024	0.958	2.27E-01
O94906	Pre-mRNA-processing factor 6	PRPF6	51.3	106.92	300.34	298	42	42	49	50	54	50	47	48	39	38	42	40	41	41	39	38	42	40	41	41	5021000000	5485100000	5163000000	5285900000	5298600000	5144000000	0.96	1.048	0.987	1.01	1.013	0.983	1.028	3.21E-01
O94913	Pre-mRNA cleavage complex 2 protein Pcf11	PCF11	7.5	173.05	24.221	19	10	10	6	2	5	1	3	2	8	5	5	6	4	5	8	5	5	6	4	5	78783000	50098000	78392000	66639000	75094000	64305000	1.144	0.727	1.138	0.967	1.09	0.934	0.779	3.22E-02
O94915	Protein furry homolog-like	FRYL	2.8	339.59	22.586	13	6	6	4	0	2	1	3	3	5	3	4	3	4	4	5	3	4	3	4	4	65988000	67426000	62311000	65462000	61678000	61254000	1.031	1.053	0.973	1.023	0.963	0.957	1.022	5.73E-01
O94919	Endonuclease domain-containing 1 protein	ENDOD1	37.2	55.016	83.976	60	12	12	7	12	7	14	9	11	10	10	9	11	9	10	10	10	9	11	9	10	474380000	440160000	536630000	568570000	569670000	495540000	0.923	0.856	1.044	1.106	1.108	0.964	0.952	6.13E-01
O94925	Glutaminase kidney isoform, mitochondrial	GLS	38	73.46	169.91	165	19	19	27	29	27	28	28	26	19	18	19	19	18	18	19	18	19	19	18	18	3166400000	2773200000	3055600000	2992700000	3350200000	3008700000	1.036	0.907	0.999	0.979	1.096	0.984	0.917	8.13E-02
O94964	Protein SOGA1	SOGA1	7.2	159.76	42.81	26	8	7	5	5	4	6	3	3	7	7	6	6	6	6	6	6	5	5	5	5	130010000	144030000	103290000	123020000	108150000	139150000	1.043	1.156	0.829	0.987	0.868	1.117	1.19	1.06E-01
O94966	Ubiquitin carboxyl-terminal hydrolase 19	USP19	16.1	145.65	111.48	40	11	11	5	7	7	7	9	5	7	8	6	9	11	7	7	8	6	9	11	7	184070000	185290000	192650000	162570000	211150000	145020000	1.022	1.029	1.07	0.903	1.172	0.805	0.838	8.86E-02
O94973	AP-2 complex subunit alpha-2	AP2A2	43.8	103.96	84.899	70	30	21	11	11	13	9	16	10	25	27	26	23	26	22	16	18	17	14	17	13	643720000	634370000	565930000	643410000	645670000	622710000	1.028	1.013	0.904	1.028	1.031	0.995	1.024	6.06E-01
O94979	Protein transport protein Sec31A	SEC31A	23.6	133.01	67.125	76	25	25	16	11	11	12	14	12	18	17	17	17	19	16	18	17	17	17	19	16	406650000	401570000	428740000	451820000	414480000	460480000	0.952	0.94	1.003	1.057	0.97	1.078	1.051	3.35E-01
O94992	Protein HEXIM1	HEXIM1	36.8	40.623	82.101	37	7	7	6	5	7	6	6	7	5	5	6	6	6	6	5	5	6	6	6	6	419490000	412760000	543270000	452370000	509620000	494390000	0.889	0.875	1.151	0.958	1.08	1.047	0.923	4.39E-01
O95067	G2/mitotic-specific cyclin-B2	CCNB2	16.8	45.281	25.539	16	5	5	2	3	3	2	4	2	4	4	5	5	5	5	4	4	5	5	5	5	90904000	78066000	94818000	100290000	100750000	94182000	0.976	0.838	1.018	1.076	1.081	1.011	0.951	5.55E-01
O95070	Protein YIF1A	YIF1A	13.3	32.011	10.583	22	3	3	4	4	3	4	3	4	3	3	3	3	3	3	3	3	3	3	3	3	383610000	269170000	355300000	261840000	379020000	284300000	1.191	0.835	1.103	0.813	1.176	0.882	0.729	7.81E-04
O95071	E3 ubiquitin-protein ligase UBR5	UBR5	5.9	309.35	36.212	36	14	14	6	7	3	8	4	8	12	11	10	12	10	12	12	11	10	12	10	12	187280000	227520000	214540000	235430000	236970000	255950000	0.828	1.005	0.948	1.04	1.047	1.131	1.125	1.85E-01
O95104	Splicing factor, arginine/serine-rich 15	SCAF4	15.8	125.87	90.094	58	12	9	8	9	11	11	8	11	11	10	12	10	12	11	8	7	9	7	9	8	760280000	930400000	788030000	970420000	832960000	1056500000	0.854	1.046	0.886	1.091	0.936	1.187	1.242	1.09E-02
O95139	NADH dehydrogenase [ubiquinone] 1 beta subcomplex subunit 6	NDUFB6	41.4	15.489	9.9669	34	5	5	5	6	6	8	5	4	5	4	5	5	5	5	5	4	5	5	5	5	407960000	272830000	546170000	367250000	399400000	351170000	1.044	0.698	1.398	0.94	1.022	0.899	0.732	9.64E-02
O95140	Mitofusin-2	MFN2	33.2	86.401	107.9	107	24	24	19	15	20	17	19	17	20	20	22	20	21	19	20	20	22	20	21	19	781350000	625940000	806750000	641060000	810100000	710670000	1.071	0.858	1.106	0.879	1.111	0.974	0.825	7.10E-03
O95155	Ubiquitin conjugation factor E4 B	UBE4B	8.8	146.18	25.537	6	7	7	1	1	0	1	2	1	4	7	5	6	5	6	4	7	5	6	5	6	101650000	145290000	110530000	160050000	161630000	108640000	0.774	1.107	0.842	1.219	1.231	0.827	1.107	6.09E-01
O95159	Zinc finger protein-like 1	ZFPL1	24.5	34.114	64.715	56	7	7	10	7	10	9	12	8	7	6	6	7	6	7	7	6	6	7	6	7	357700000	329740000	357630000	323710000	371680000	386410000	1.009	0.93	1.009	0.913	1.049	1.09	0.957	4.86E-01
O95163	Elongator complex protein 1	IKBKAP	18.8	150.25	88.105	78	18	18	14	11	14	13	9	17	16	14	16	14	14	15	16	14	16	14	14	15	485150000	541190000	487720000	517260000	468340000	532540000	0.96	1.071	0.965	1.024	0.927	1.054	1.104	5.74E-03
O95167	NADH dehydrogenase [ubiquinone] 1 alpha subcomplex subunit 3	NDUFA3	50	9.2787	10.925	22	3	3	4	4	3	5	3	3	3	3	2	3	2	2	3	3	2	3	2	2	648730000	498600000	722020000	439560000	553690000	414390000	1.188	0.913	1.322	0.805	1.014	0.759	0.703	2.53E-02
O95168	NADH dehydrogenase [ubiquinone] 1 beta subcomplex subunit 4	NDUFB4	46.5	15.208	20.095	49	6	6	9	8	6	10	8	8	6	6	6	6	6	6	6	6	6	6	6	6	656120000	585350000	608090000	539730000	542720000	526550000	1.138	1.015	1.055	0.936	0.942	0.913	0.914	2.38E-01
O95169	NADH dehydrogenase [ubiquinone] 1 beta subcomplex subunit 8, mitochondrial	NDUFB8	27.4	21.766	14.085	24	4	4	5	4	3	4	4	4	4	4	4	4	4	4	4	4	4	4	4	4	251280000	188610000	251920000	160070000	235550000	213170000	1.159	0.87	1.162	0.738	1.087	0.983	0.761	2.22E-02
O95171	Sciellin	SCEL	12.8	77.551	12.832	19	7	7	4	3	2	4	3	3	6	4	5	6	6	4	6	4	5	6	6	4	98020000	105900000	93316000	111020000	106800000	108570000	0.943	1.019	0.898	1.068	1.028	1.045	1.092	9.68E-02
O95182	NADH dehydrogenase [ubiquinone] 1 alpha subcomplex subunit 7	NDUFA7	57.5	12.551	15.075	38	7	7	6	7	7	5	6	7	7	7	7	7	7	7	7	7	7	7	7	7	497740000	310140000	505880000	392500000	624700000	383590000	1.1	0.686	1.118	0.868	1.381	0.848	0.667	2.05E-02
O95183	Vesicle-associated membrane protein 5	VAMP5	12.1	12.805	2.4233	11	2	2	1	2	2	2	2	2	2	2	2	2	2	2	2	2	2	2	2	2	919960000	847550000	874990000	784090000	922440000	827160000	1.066	0.982	1.014	0.909	1.069	0.959	0.905	2.37E-02
O95197	Reticulon-3	RTN3	8.2	112.61	39.513	34	5	5	7	6	6	4	5	6	4	4	5	3	3	3	4	4	5	3	3	3	1079800000	990510000	1008200000	919780000	1116100000	1345000000	1.003	0.92	0.936	0.854	1.037	1.249	1.016	9.06E-01
O95202	LETM1 and EF-hand domain-containing protein 1, mitochondrial	LETM1	51.6	83.353	323.31	308	36	36	52	45	52	48	59	52	33	31	35	33	36	33	33	31	35	33	36	33	5616000000	5483000000	5892300000	5367800000	5636500000	5301600000	1.012	0.988	1.062	0.967	1.016	0.955	0.942	3.30E-02
O95208	Epsin-2	EPN2	15.6	68.481	53.442	36	7	6	5	6	5	7	7	6	6	7	6	7	7	7	5	6	5	6	6	6	312200000	256710000	302300000	272480000	295160000	272560000	1.095	0.9	1.06	0.955	1.035	0.956	0.881	7.60E-03
O95218	Zinc finger Ran-binding domain-containing protein 2	ZRANB2	16.1	37.404	11.647	29	6	6	7	5	3	6	4	4	6	4	5	5	6	4	6	4	5	5	6	4	230620000	258780000	261620000	247050000	205480000	304170000	0.918	1.03	1.041	0.983	0.818	1.21	1.161	1.91E-01
O95219	Sorting nexin-4	SNX4	27.3	51.908	75.506	56	10	10	9	8	10	11	9	9	10	9	9	10	10	10	10	9	9	10	10	10	265190000	240110000	264400000	211330000	300240000	251190000	1.038	0.94	1.035	0.827	1.176	0.983	0.847	6.46E-02
O95229	ZW10 interactor	ZWINT	9	31.293	5.3704	7	2	2	2	2	1	0	1	1	2	2	2	2	2	2	2	2	2	2	2	2	32079000	24821000	34142000	28527000	41243000	27036000	1.025	0.793	1.091	0.911	1.317	0.864	0.748	3.87E-02
O95232	Luc7-like protein 3	LUC7L3	31.7	51.466	111.35	101	12	12	14	17	16	18	17	19	11	11	12	12	12	12	11	11	12	12	12	12	1193300000	1399400000	1197500000	1326300000	1077300000	1354300000	0.949	1.112	0.952	1.054	0.856	1.077	1.176	1.04E-02
O95235	Kinesin-like protein KIF20A	KIF20A	20.1	100.28	75.746	50	14	14	9	6	9	9	10	7	13	9	10	11	11	11	13	9	10	11	11	11	226080000	258860000	247040000	230720000	246420000	218210000	0.95	1.088	1.038	0.97	1.036	0.917	0.984	7.91E-01
O95239	Chromosome-associated kinesin KIF4A	KIF4A	24.3	139.88	98.811	90	24	23	16	16	16	14	11	17	20	22	22	20	17	20	19	21	21	19	16	19	663030000	687130000	617200000	682360000	623010000	712780000	0.998	1.034	0.929	1.027	0.938	1.073	1.094	2.57E-02
O95249	Golgi SNAP receptor complex member 1	GOSR1	42	28.612	57.415	64	11	11	8	9	11	13	10	13	8	10	9	8	11	8	8	10	9	8	11	8	727360000	512500000	856160000	528070000	711020000	540860000	1.126	0.793	1.325	0.817	1.101	0.837	0.689	7.00E-03
O95274	Ly6/PLAUR domain-containing protein 3	LYPD3	14.2	35.97	13.596	13	3	3	2	3	2	2	1	3	3	3	2	3	2	3	3	3	2	3	2	3	74413000	108570000	67301000	106160000	64744000	95038000	0.865	1.262	0.782	1.234	0.753	1.105	1.5	2.46E-03
O95292	Vesicle-associated membrane protein-associated protein B/C	VAPB	59.3	27.228	35.791	113	13	12	19	18	18	18	21	19	12	12	12	13	12	12	11	11	11	12	11	11	4774000000	4427500000	4793600000	4569700000	4716500000	4682600000	1.024	0.95	1.029	0.98	1.012	1.005	0.958	5.98E-02
O95295	SNARE-associated protein Snapin	SNAPIN	41.9	14.874	37.074	13	4	4	2	2	2	3	2	2	2	3	3	4	3	3	2	3	3	4	3	3	56427000	61507000	55100000	52909000	47251000	51885000	1.041	1.135	1.017	0.977	0.872	0.958	1.047	5.81E-01
O95297	Myelin protein zero-like protein 1	MPZL1	27.5	29.082	40.826	38	5	5	7	6	7	7	4	7	5	5	5	5	5	5	5	5	5	5	5	5	303940000	367360000	309980000	345490000	295830000	336480000	0.931	1.125	0.949	1.058	0.906	1.031	1.153	9.78E-03
O95298	NADH dehydrogenase [ubiquinone] 1 subunit C2	NDUFC2	35.3	14.187	7.5271	27	5	5	4	4	5	4	5	5	4	4	5	5	5	5	4	4	5	5	5	5	742900000	506890000	533710000	554140000	617120000	520790000	1.283	0.875	0.921	0.957	1.065	0.899	0.835	1.71E-01
O95299	NADH dehydrogenase [ubiquinone] 1 alpha subcomplex subunit 10, mitochondrial	NDUFA10	43.7	40.75	61.295	72	11	11	12	14	11	15	9	11	11	10	10	11	8	10	11	10	10	11	8	10	1389200000	1269200000	1412800000	1215800000	1261700000	1266900000	1.066	0.974	1.085	0.933	0.969	0.973	0.923	1.06E-01
O95302	Peptidyl-prolyl cis-trans isomerase FKBP9	FKBP9	34.2	63.083	49.724	94	18	17	18	15	15	16	16	14	18	16	17	16	17	16	17	15	16	15	16	15	1012000000	950070000	1030900000	978190000	1066900000	948060000	1.014	0.952	1.033	0.98	1.069	0.95	0.925	1.44E-02
O95336	6-phosphogluconolactonase	PGLS	47.3	27.547	35.057	29	7	7	5	6	5	4	5	4	6	7	5	6	6	6	6	7	5	6	6	6	144560000	193550000	120750000	166780000	133390000	165970000	0.938	1.255	0.783	1.082	0.865	1.077	1.32	2.01E-02
O95347	Structural maintenance of chromosomes protein 2	SMC2	35.2	135.65	209.1	202	39	39	36	35	35	34	30	32	36	33	35	33	34	38	36	33	35	33	34	38	1956500000	2120100000	1994500000	2080900000	1784800000	2036600000	0.98	1.062	0.999	1.043	0.894	1.021	1.087	7.21E-02
O95361	Tripartite motif-containing protein 16	TRIM16	29.1	63.954	68.766	61	13	13	12	10	8	9	10	12	11	10	11	12	11	12	11	10	11	12	11	12	341060000	359400000	387130000	424900000	361800000	388360000	0.904	0.953	1.027	1.127	0.959	1.03	1.076	3.00E-01
O95365	Zinc finger and BTB domain-containing protein 7A	ZBTB7A	25.2	61.438	64.902	38	8	8	7	6	8	5	6	6	7	8	7	6	6	6	7	8	7	6	6	6	258810000	200860000	214320000	184980000	220730000	212410000	1.202	0.933	0.995	0.859	1.025	0.986	0.862	1.17E-01
O95372	Acyl-protein thioesterase 2	LYPLA2	26.8	24.737	28.114	16	3	3	4	2	3	2	2	3	3	2	3	2	3	2	3	2	3	2	3	2	178810000	193410000	166010000	283360000	182980000	187680000	0.9	0.973	0.835	1.426	0.921	0.944	1.259	2.21E-01
O95373	Importin-7	IPO7	29.5	119.52	177.6	164	24	23	28	28	26	28	27	27	23	22	22	20	22	21	22	21	21	19	21	20	1978300000	2334200000	2099900000	2330300000	2113300000	2317800000	0.901	1.063	0.956	1.061	0.963	1.056	1.128	2.59E-02
O95376	E3 ubiquitin-protein ligase ARIH2	ARIH2	5.7	57.818	5.0746	3	2	2	0	0	0	2	0	1	1	1	2	2	0	2	1	1	2	2	0	2	0	0	45039000	30912000	0	48260000			1.088	0.747		1.166	0.879
O95391	Pre-mRNA-splicing factor SLU7	SLU7	21.7	68.386	53.686	33	10	10	6	6	6	7	3	5	9	10	8	9	8	9	9	10	8	9	8	9	281720000	326220000	283090000	299820000	256300000	255360000	0.993	1.15	0.998	1.057	0.903	0.9	1.073	4.21E-01
O95394	Phosphoacetylglucosamine mutase	PGM3	17.3	59.851	16.008	22	7	7	3	4	3	5	2	5	6	5	5	6	5	5	6	5	5	6	5	5	197620000	198570000	241590000	222590000	222080000	207580000	0.919	0.924	1.124	1.035	1.033	0.965	0.951	4.96E-01
O95400	CD2 antigen cytoplasmic tail-binding protein 2	CD2BP2	51	37.646	59.115	51	10	10	8	8	6	11	8	10	9	10	9	10	9	8	9	10	9	10	9	8	630400000	807910000	613040000	715640000	635200000	723610000	0.917	1.175	0.892	1.041	0.924	1.052	1.196	1.54E-02
O95406	Protein cornichon homolog 1	CNIH1	17.4	16.699	19.968	7	1	1	1	1	2	2	0	1	1	1	1	1	1	1	1	1	1	1	1	1	87765000	101010000	107480000	98694000	0	99850000	0.887	1.021	1.086	0.997		1.009	1.023	8.59E-01
O95425	Supervillin	SVIL	16.8	247.74	112.34	72	24	24	8	16	8	15	8	17	16	16	14	20	15	18	16	16	14	20	15	18	333070000	436770000	339720000	525630000	340850000	490060000	0.81	1.063	0.827	1.279	0.829	1.192	1.433	3.00E-02
O95433	Activator of 90 kDa heat shock protein ATPase homolog 1	AHSA1	54.4	38.274	90.235	95	14	14	16	15	20	14	15	15	13	13	13	13	12	12	13	13	13	13	12	12	2158000000	2131500000	2240400000	2001000000	2005000000	2226600000	1.015	1.002	1.053	0.941	0.943	1.047	0.993	8.84E-01
O95453	Poly(A)-specific ribonuclease PARN	PARN	35.8	73.45	69.512	98	20	20	18	17	16	16	15	16	19	18	20	18	19	18	19	18	20	18	19	18	1418300000	1251600000	1357800000	1278700000	1421000000	1158400000	1.079	0.952	1.033	0.973	1.081	0.881	0.879	1.55E-02
O95456	Proteasome assembly chaperone 1	PSMG1	36.1	32.854	28.27	44	9	9	7	9	7	8	4	9	8	9	8	9	8	9	8	9	8	9	8	9	343500000	383640000	407510000	375430000	387180000	395840000	0.899	1.004	1.066	0.982	1.013	1.036	1.015	7.92E-01
O95466	Formin-like protein 1	FMNL1	2.5	121.85	4.1921	10	3	2	2	1	2	1	2	2	3	3	3	3	3	3	2	2	2	2	2	2	121750000	143430000	116200000	163970000	146760000	150520000	0.867	1.021	0.827	1.168	1.045	1.072	1.19	9.41E-02
O95470	Sphingosine-1-phosphate lyase 1	SGPL1	32.2	63.523	46.406	72	16	16	12	11	12	13	12	12	15	16	16	15	16	14	15	16	16	15	16	14	727340000	736530000	751390000	734240000	752020000	654430000	1.002	1.015	1.035	1.011	1.036	0.901	0.953	2.80E-01
O95478	Ribosome biogenesis protein NSA2 homolog	NSA2	43.5	30.065	23.84	38	10	10	6	5	5	8	8	6	9	8	8	8	9	8	9	8	8	8	9	8	808380000	688000000	880450000	768730000	791170000	728370000	1.04	0.885	1.132	0.989	1.018	0.937	0.881	5.21E-02
O95479	GDH/6PGL endoplasmic bifunctional protein	H6PD	11.6	88.892	17.406	13	8	8	2	2	2	3	3	1	5	6	7	6	6	7	5	6	7	6	6	7	99985000	95871000	107270000	78944000	135240000	110150000	0.956	0.917	1.026	0.755	1.293	1.053	0.832	2.43E-01
O95486	Protein transport protein Sec24A	SEC24A	4.2	119.75	13.269	14	4	4	2	2	3	2	2	3	4	3	3	3	3	3	4	3	3	3	3	3	58220000	53030000	61139000	54347000	48662000	50911000	1.071	0.975	1.124	0.999	0.895	0.936	0.942	4.52E-01
O95487	Protein transport protein Sec24B	SEC24B	12.7	137.42	31.149	37	11	11	5	7	4	7	5	9	5	9	7	11	7	10	5	9	7	11	7	10	176770000	177570000	168330000	166400000	165410000	181690000	1.024	1.028	0.975	0.964	0.958	1.052	1.03	4.26E-01
O95551	Tyrosyl-DNA phosphodiesterase 2	TDP2	18	40.929	34.99	31	5	5	6	5	4	6	4	6	5	5	5	5	5	5	5	5	5	5	5	5	161240000	138930000	147640000	158140000	157080000	164900000	1.043	0.898	0.955	1.023	1.016	1.066	0.991	8.87E-01
O95563	Mitochondrial pyruvate carrier 2	MPC2	18.9	14.279	10.722	17	3	3	3	3	3	2	3	3	3	2	3	2	3	3	3	2	3	2	3	3	88605000	78902000	90690000	100210000	78536000	65812000	1.057	0.942	1.082	1.196	0.937	0.785	0.95	7.08E-01
O95571	Persulfide dioxygenase ETHE1, mitochondrial	ETHE1	71.3	27.873	78.159	84	12	12	15	14	14	14	14	13	12	11	10	12	12	11	12	11	10	12	12	11	889830000	790940000	788090000	995330000	869530000	742560000	1.052	0.935	0.931	1.176	1.028	0.878	0.993	9.44E-01
O95573	Long-chain-fatty-acid--CoA ligase 3	ACSL3	47.5	80.419	105.05	189	26	24	34	32	30	34	30	29	24	26	25	24	24	22	22	24	23	22	22	20	2439500000	2248200000	2472800000	2362700000	2529000000	2246200000	1.024	0.943	1.038	0.991	1.061	0.943	0.921	1.39E-02
O95602	DNA-directed RNA polymerase I subunit RPA1	POLR1A	39.7	194.81	225.14	269	55	55	49	41	47	41	53	38	48	49	52	49	49	46	48	49	52	49	49	46	3021300000	2536000000	3116500000	2535100000	3013100000	2614400000	1.077	0.904	1.111	0.903	1.074	0.932	0.84	3.21E-04
O95613	Pericentrin	PCNT	3.4	378.03	18.028	6	6	6	1	1	1	0	2	1	4	3	3	1	4	3	4	3	3	1	4	3	89926000	95428000	0	0	88420000	93991000	0.978	1.038			0.962	1.022	1.062	3.36E-02
O95619	YEATS domain-containing protein 4	YEATS4	12.8	26.499	5.765	9	3	3	2	0	2	1	2	2	2	3	2	3	2	3	2	3	2	3	2	3	64747000	49703000	53120000	53417000	73491000	43043000	1.151	0.884	0.944	0.95	1.306	0.765	0.764	8.57E-02
O95625	Zinc finger and BTB domain-containing protein 11	ZBTB11	3.8	119.38	6.6099	6	3	3	1	1	0	1	2	1	3	2	2	2	2	2	3	2	2	2	2	2	23348000	23472000	23677000	22421000	36192000	0	0.904	0.909	0.917	0.868	1.402		0.827	4.46E-01
O95630	STAM-binding protein	STAMBP	17.9	48.076	19.072	23	7	7	3	4	4	5	3	4	5	7	5	7	5	5	5	7	5	7	5	5	154110000	171360000	179310000	175550000	160630000	159630000	0.924	1.028	1.075	1.053	0.963	0.957	1.025	6.65E-01
O95639	Cleavage and polyadenylation specificity factor subunit 4	CPSF4	27.1	30.255	35.222	33	5	5	5	5	6	5	7	5	4	5	4	4	4	4	4	5	4	4	4	4	232860000	250440000	254610000	286030000	279380000	254030000	0.897	0.965	0.981	1.102	1.076	0.979	1.031	6.77E-01
O95671	N-acetylserotonin O-methyltransferase-like protein	ASMTL	14	68.856	26.296	23	6	6	3	4	5	4	2	5	4	6	5	6	5	5	4	6	5	6	5	5	181950000	204530000	190930000	209560000	195340000	210400000	0.915	1.029	0.96	1.054	0.983	1.058	1.099	1.25E-02
O95674	Phosphatidate cytidylyltransferase 2	CDS2	12.4	51.417	38.337	11	3	3	2	2	1	2	2	2	3	2	3	2	3	1	3	2	3	2	3	1	201410000	176970000	207280000	176160000	195770000	181180000	1.061	0.932	1.092	0.928	1.031	0.955	0.884	3.10E-03
O95714	E3 ubiquitin-protein ligase HERC2	HERC2	4.9	527.22	48.418	47	19	19	7	8	7	9	8	8	13	13	16	16	15	12	13	13	16	16	15	12	257640000	254040000	252780000	232840000	215770000	262590000	1.048	1.033	1.028	0.947	0.877	1.068	1.032	6.51E-01
O95716	Ras-related protein Rab-3D	RAB3D	29.7	24.267	16.926	32	6	5	6	4	6	5	6	5	6	5	6	5	6	5	5	4	5	4	5	4	409020000	194640000	413770000	206580000	409300000	211520000	1.33	0.633	1.346	0.672	1.331	0.688	0.497	1.24E-06
O95721	Synaptosomal-associated protein 29	SNAP29	30.2	28.97	20.038	24	6	6	6	2	3	4	5	4	5	4	5	5	6	5	5	4	5	5	6	5	168280000	140600000	153540000	137560000	165770000	202430000	1.043	0.871	0.952	0.852	1.027	1.254	0.986	9.19E-01
O95747	Serine/threonine-protein kinase OSR1	OXSR1	33.6	58.022	118.37	83	15	12	13	15	15	14	12	14	13	15	15	14	12	14	10	12	12	11	9	11	688300000	740780000	626900000	841050000	689090000	705590000	0.962	1.036	0.876	1.176	0.963	0.986	1.141	1.07E-01
O95757	Heat shock 70 kDa protein 4L	HSPA4L	34.9	94.511	66.298	61	20	18	6	10	9	12	10	14	18	17	18	18	17	18	16	15	16	16	15	16	342170000	352430000	385310000	331940000	391490000	346570000	0.955	0.984	1.075	0.926	1.093	0.967	0.921	1.53E-01
O95758	Polypyrimidine tract-binding protein 3	PTBP3	45.7	59.689	111.59	92	15	13	17	14	13	15	15	18	13	14	14	14	15	15	11	12	12	12	13	13	940850000	854870000	938110000	1011800000	1015000000	1014600000	0.977	0.888	0.975	1.051	1.055	1.054	0.996	9.46E-01
O95777	U6 snRNA-associated Sm-like protein LSm8	LSM8	74	10.403	26.338	36	6	6	7	7	4	5	6	7	5	4	4	5	5	6	5	4	4	5	5	6	763200000	866090000	810030000	795150000	851560000	806910000	0.936	1.062	0.993	0.975	1.044	0.989	1.018	6.90E-01
O95782	AP-2 complex subunit alpha-1	AP2A1	49.9	107.54	135.26	233	42	33	38	41	42	35	37	40	38	38	39	35	38	36	29	29	30	26	29	27	3729700000	3292200000	3467700000	3234600000	3452300000	3279700000	1.094	0.966	1.017	0.949	1.013	0.962	0.921	3.75E-02
O95785	Protein Wiz	WIZ	17.1	178.67	68.432	76	20	20	13	10	12	12	16	13	19	19	19	18	20	18	19	19	19	18	20	18	535560000	412580000	567000000	452560000	567120000	387370000	1.1	0.847	1.164	0.929	1.164	0.795	0.75	3.04E-03
O95793	Double-stranded RNA-binding protein Staufen homolog 1	STAU1	43.5	63.182	139.58	155	23	21	26	29	20	28	26	26	21	22	19	22	21	21	19	20	17	20	19	19	1876000000	2003600000	1969300000	2060200000	2011800000	1991300000	0.945	1.009	0.992	1.038	1.013	1.003	1.034	2.19E-01
O95801	Tetratricopeptide repeat protein 4	TTC4	18.3	44.678	23.605	16	4	4	1	4	2	4	1	4	1	4	4	4	3	4	1	4	4	4	3	4	0	148010000	37848000	140510000	26086000	109220000		1.603	0.41	1.522	0.283	1.183	4.147	8.06E-03
O95807	Transmembrane protein 50A	TMEM50A	21	17.4	11.233	13	3	3	1	2	2	4	2	2	2	3	3	3	3	3	2	3	3	3	3	3	53346000	62917000	60133000	50927000	50594000	58916000	0.95	1.121	1.071	0.907	0.901	1.049	1.053	5.57E-01
O95817	BAG family molecular chaperone regulator 3	BAG3	60.9	61.594	144.55	127	22	22	21	21	20	19	23	23	20	19	19	18	20	20	20	19	19	18	20	20	1022900000	749660000	947280000	850560000	1020500000	900200000	1.118	0.819	1.035	0.929	1.115	0.984	0.836	3.23E-02
O95819	Mitogen-activated protein kinase kinase kinase kinase 4	MAP4K4	15.7	142.1	77.998	38	15	10	3	5	8	8	7	7	13	13	14	13	13	12	8	8	9	8	8	7	229270000	215580000	215260000	229160000	225550000	257640000	1.002	0.942	0.941	1.002	0.986	1.126	1.048	4.57E-01
O95822	Malonyl-CoA decarboxylase, mitochondrial	MLYCD	11.2	55.003	18.344	22	4	4	3	4	4	4	3	4	3	4	4	4	4	4	3	4	4	4	4	4	103890000	90473000	111540000	98119000	102110000	92691000	1.041	0.907	1.118	0.983	1.023	0.929	0.886	3.03E-02
O95831	Apoptosis-inducing factor 1, mitochondrial	AIFM1	54.6	66.9	184.1	211	26	26	34	35	38	38	31	35	26	22	26	23	25	24	26	22	26	23	25	24	5273600000	4753400000	5100800000	5045000000	5226500000	4814300000	1.047	0.944	1.013	1.002	1.038	0.956	0.937	3.27E-02
O95834	Echinoderm microtubule-associated protein-like 2	EML2	25.3	70.678	71.15	46	12	12	8	8	7	8	10	5	11	10	12	11	11	10	11	10	12	11	11	10	318960000	331830000	316520000	335030000	356420000	340060000	0.957	0.996	0.95	1.006	1.07	1.021	1.015	7.22E-01
O95857	Tetraspanin-13	TSPAN13	25.5	22.147	13.531	25	4	4	5	2	5	4	5	4	4	3	4	4	4	4	4	3	4	4	4	4	245580000	146860000	205940000	174520000	261080000	117570000	1.28	0.765	1.073	0.909	1.36	0.613	0.616	1.72E-02
O95861	3'(2'),5'-bisphosphate nucleotidase 1	BPNT1	53.9	33.392	31.867	51	14	14	7	8	10	9	9	8	12	13	13	12	13	12	12	13	13	12	13	12	419350000	431820000	388230000	456790000	406490000	410860000	1.001	1.031	0.927	1.09	0.97	0.981	1.07	1.51E-01
O95870	Protein ABHD16A	ABHD16A	12.9	63.243	39.606	15	4	4	3	3	2	1	4	2	4	3	2	2	3	3	4	3	2	2	3	3	71487000	67197000	86789000	91087000	89668000	77827000	0.886	0.833	1.076	1.129	1.111	0.965	0.952	6.81E-01
O95881	Thioredoxin domain-containing protein 12	TXNDC12	36	19.206	15.049	59	6	6	10	10	11	8	10	10	6	6	6	6	6	6	6	6	6	6	6	6	1508700000	1343800000	1608100000	1356000000	1514000000	1560000000	1.018	0.907	1.085	0.915	1.022	1.053	0.92	1.84E-01
O95900	Probable tRNA pseudouridine synthase 2	TRUB2	13.9	36.694	8.1941	12	4	4	3	1	2	1	3	2	4	3	4	4	4	4	4	3	4	4	4	4	61914000	55674000	49897000	58955000	56186000	58377000	1.089	0.98	0.878	1.037	0.989	1.027	1.03	6.68E-01
O95905	Protein ecdysoneless homolog	ECD	9.3	72.757	5.3562	6	4	4	0	2	1	1	1	1	2	3	3	4	2	3	2	3	3	4	2	3	0	37550000	31470000	38406000	43241000	24474000		1.072	0.898	1.096	1.234	0.699	0.896	6.31E-01
O95926	Pre-mRNA-splicing factor SYF2	SYF2	34.6	28.722	50.166	25	7	7	4	4	5	4	4	4	4	5	5	6	3	4	4	5	5	6	3	4	157530000	149480000	144790000	138050000	146980000	151480000	1.064	1.01	0.978	0.932	0.993	1.023	0.977	5.82E-01
O95983	Methyl-CpG-binding domain protein 3	MBD3	40.5	32.844	39.313	48	7	7	7	9	7	10	7	8	7	7	7	7	7	7	7	7	7	7	7	7	414960000	412810000	482380000	547180000	521290000	502350000	0.864	0.86	1.005	1.14	1.086	1.046	1.031	7.86E-01
O95985	DNA topoisomerase 3-beta-1	TOP3B	4.4	96.661	4.5655	6	2	2	1	1	1	1	1	1	1	2	2	1	2	2	1	2	2	1	2	2	0	28920000	25820000	0	30126000	26706000		1.037	0.926		1.08	0.957	0.994	9.53E-01
O95999	B-cell lymphoma/leukemia 10	BCL10	21.5	26.251	10.521	11	4	4	1	1	2	3	2	2	2	2	4	4	2	4	2	2	4	4	2	4	59096000	103740000	85167000	106450000	98993000	140000000	0.597	1.049	0.861	1.076	1.001	1.415	1.44	9.71E-02
O96000	NADH dehydrogenase [ubiquinone] 1 beta subcomplex subunit 10	NDUFB10	57.6	20.776	99.434	91	11	11	18	12	16	16	15	14	11	10	11	10	11	9	11	10	11	10	11	9	2374700000	2147200000	2378700000	2160000000	2566500000	2279200000	1.025	0.926	1.026	0.932	1.107	0.983	0.9	3.23E-02
O96005	Cleft lip and palate transmembrane protein 1	CLPTM1	37.2	76.096	91.658	111	16	16	17	19	18	20	19	18	15	14	13	15	15	15	15	14	13	15	15	15	1596000000	1420700000	1586900000	1462100000	1689800000	1564000000	1.028	0.915	1.022	0.941	1.088	1.007	0.913	5.77E-02
O96008	Mitochondrial import receptor subunit TOM40 homolog	TOMM40	48.2	37.893	179.53	144	9	9	22	22	26	28	23	23	9	9	9	9	9	9	9	9	9	9	9	9	5266600000	4846700000	5113700000	4623300000	5342300000	4138800000	1.077	0.991	1.046	0.946	1.093	0.847	0.866	3.26E-02
O96011	Peroxisomal membrane protein 11B	PEX11B	17	28.431	7.6664	15	4	4	4	2	3	3	3	0	4	4	4	4	4	3	4	4	4	4	4	3	144060000	123460000	147280000	132420000	128290000	139990000	1.06	0.908	1.084	0.974	0.944	1.03	0.943	3.54E-01
O96013	Serine/threonine-protein kinase PAK 4	PAK4	21.8	64.071	44.728	37	9	8	8	5	8	4	8	4	8	7	8	8	8	7	8	6	8	7	7	6	212720000	189710000	215700000	213000000	263160000	221200000	0.97	0.865	0.984	0.972	1.2	1.009	0.902	2.98E-01
O96017	Serine/threonine-protein kinase Chk2	CHEK2	6.4	60.914	9.5467	8	3	3	1	1	2	2	1	1	1	2	3	3	1	2	1	2	3	3	1	2	0	38918000	36766000	0	0	43362000		0.981	0.927			1.093	1.119
O96019	Actin-like protein 6A	ACTL6A	37.1	47.46	104.28	79	11	11	10	18	9	15	12	15	10	10	11	11	11	11	10	10	11	11	11	11	1810800000	1506500000	1485400000	1537800000	1405000000	1590000000	1.164	0.968	0.955	0.988	0.903	1.022	0.986	8.69E-01
O96028	Histone-lysine N-methyltransferase NSD2	WHSC1	13.4	152.26	46.402	39	13	12	7	5	5	8	7	7	10	8	6	9	10	9	9	8	6	9	10	8	205090000	177340000	154690000	198110000	195570000	186670000	1.101	0.952	0.831	1.064	1.05	1.002	1.012	8.98E-01
P00156	Cytochrome b	MT-CYB	2.4	42.717	1.7745	7	1	1	1	2	1	1	1	1	1	1	1	1	1	1	1	1	1	1	1	1	0	87274000	83777000	95609000	94991000	89809000		0.967	0.928	1.059	1.052	0.995	1.017	7.92E-01
P00338	L-lactate dehydrogenase A chain	LDHA	62.7	36.688	136.94	305	20	19	46	53	46	55	47	58	20	20	20	20	20	20	19	19	19	19	19	19	26025000000	26750000000	25063000000	26133000000	24406000000	27933000000	0.999	1.027	0.962	1.003	0.937	1.072	1.07	6.61E-02
P00367	Glutamate dehydrogenase 1, mitochondrial	GLUD1	62.5	61.397	250.95	357	30	30	59	61	59	63	59	56	29	30	29	30	29	29	29	30	29	30	29	29	11857000000	11026000000	12095000000	11018000000	12297000000	11353000000	1.021	0.95	1.042	0.949	1.059	0.978	0.921	4.84E-03
P00374	Dihydrofolate reductase	DHFR	18.2	21.452	6.9675	10	2	2	2	2	1	2	2	1	2	2	2	2	2	2	2	2	2	2	2	2	58504000	60572000	52628000	49883000	48264000	46848000	1.108	1.148	0.997	0.945	0.914	0.888	0.987	8.98E-01
P00387	NADH-cytochrome b5 reductase 3	CYB5R3	73.8	34.234	195.81	206	19	19	33	34	31	39	33	36	19	18	18	18	19	19	19	18	18	18	19	19	5144700000	4875800000	5185200000	4893400000	5206000000	5128000000	1.014	0.961	1.022	0.965	1.026	1.011	0.959	6.28E-02
P00390	Glutathione reductase, mitochondrial	GSR	47.3	56.256	89.518	91	14	14	14	15	15	14	16	17	12	11	13	13	12	14	12	11	13	13	12	14	793950000	796360000	769670000	849860000	844010000	864920000	0.968	0.971	0.939	1.037	1.03	1.055	1.043	3.17E-01
P00395	Cytochrome c oxidase subunit 1	MT-CO1	6	57.041	4.1355	10	1	1	1	2	3	1	1	2	1	1	1	1	1	1	1	1	1	1	1	1	0	266920000	190620000	271810000	325570000	264800000		1.011	0.722	1.03	1.233	1.003	1.038	9.09E-01
P00403	Cytochrome c oxidase subunit 2	MT-CO2	43.6	25.565	33.53	88	7	7	13	16	14	16	16	13	7	7	7	7	7	7	7	7	7	7	7	7	3712400000	3255900000	3639100000	3434200000	3535900000	2919700000	1.087	0.953	1.065	1.005	1.035	0.855	0.883	5.56E-02
P00414	Cytochrome c oxidase subunit 3	MT-CO3	8.8	29.95	34.915	17	2	2	3	3	2	3	4	2	2	2	2	2	2	2	2	2	2	2	2	2	747620000	621080000	967080000	519560000	701430000	424640000	1.127	0.936	1.457	0.783	1.057	0.64	0.648	4.66E-02
P00441	Superoxide dismutase [Cu-Zn]	SOD1	53.9	15.936	229.49	85	5	5	13	15	11	15	15	16	5	5	5	5	5	5	5	5	5	5	5	5	3015300000	2869400000	3289300000	2572000000	2826100000	2653500000	1.05	0.999	1.146	0.896	0.984	0.924	0.887	9.87E-02
P00488	Coagulation factor XIII A chain	F13A1	3.3	83.266	2.7524	17	2	2	3	3	3	3	2	3	2	2	2	2	2	2	2	2	2	2	2	2	1840500000	2389500000	1716100000	2292100000	399090000	2243500000	1.015	1.318	0.946	1.264	0.22	1.237	1.751	1.66E-01
P00491	Purine nucleoside phosphorylase	PNP	69.9	32.118	115.95	102	15	15	15	21	15	18	14	19	13	15	13	14	14	15	13	15	13	14	14	15	1154500000	1353500000	1182200000	1420400000	1189400000	1397500000	0.9	1.055	0.921	1.107	0.927	1.089	1.183	6.45E-04
P00492	Hypoxanthine-guanine phosphoribosyltransferase	HPRT1	72.9	24.579	41.351	90	12	12	14	15	15	14	17	15	11	12	11	12	11	12	11	12	11	12	11	12	1545900000	1830500000	1574600000	1764100000	1593300000	1671500000	0.929	1.101	0.947	1.061	0.958	1.005	1.117	1.87E-02
P00505	Aspartate aminotransferase, mitochondrial	GOT2	73.5	47.517	225.95	391	29	29	61	68	66	61	70	65	28	28	29	28	28	27	28	28	29	28	28	27	23118000000	22646000000	23744000000	23763000000	24363000000	23381000000	0.984	0.964	1.01	1.011	1.037	0.995	0.98	3.81E-01
P00533	Epidermal growth factor receptor	EGFR	55.1	134.28	323.31	538	50	46	85	93	84	93	91	92	48	47	48	45	49	47	44	44	44	42	45	43	15054000000	14731000000	15869000000	14404000000	15669000000	14114000000	1.005	0.984	1.06	0.962	1.046	0.943	0.928	2.13E-02
P00558	Phosphoglycerate kinase 1	PGK1	71.2	44.614	218.54	317	27	27	50	53	49	55	50	60	26	27	26	27	27	27	26	27	26	27	27	27	11528000000	12576000000	11779000000	12983000000	11954000000	13880000000	0.926	1.01	0.946	1.043	0.96	1.115	1.118	2.62E-02
P00568	Adenylate kinase isoenzyme 1	AK1	34	21.635	30.641	27	6	6	4	5	4	5	4	5	5	6	6	6	5	6	5	6	6	6	5	6	181850000	216720000	197480000	250220000	194320000	237730000	0.854	1.017	0.927	1.174	0.912	1.116	1.228	1.59E-02
P00749	Urokinase-type plasminogen activator	PLAU	14.8	48.507	7.8108	17	5	5	1	5	1	3	4	3	4	4	2	4	5	3	4	4	2	4	5	3	45583000	44001000	38108000	44860000	33256000	49302000	1.072	1.035	0.896	1.055	0.782	1.16	1.181	1.47E-01
P00813	Adenosine deaminase	ADA	40.8	40.764	23.332	19	10	10	5	3	1	4	3	3	8	7	7	7	5	6	8	7	7	7	5	6	115830000	159130000	93139000	165700000	108310000	196460000	0.829	1.139	0.666	1.186	0.775	1.406	1.643	6.92E-03
P00846	ATP synthase subunit a	MT-ATP6	8.4	24.817	6.3478	13	2	2	3	2	2	1	2	3	2	2	2	2	2	2	2	2	2	2	2	2	685200000	450270000	608700000	507970000	544300000	550260000	1.228	0.807	1.091	0.911	0.976	0.987	0.821	9.28E-02
P00918	Carbonic anhydrase 2	CA2	33.5	29.246	17.784	35	7	7	7	7	4	5	7	5	7	7	7	7	7	7	7	7	7	7	7	7	355560000	359130000	372280000	308530000	355930000	340240000	1.02	1.03	1.068	0.885	1.021	0.976	0.93	1.84E-01
P00966	Argininosuccinate synthase	ASS1	20.1	46.53	15.23	38	9	9	5	7	6	6	8	6	9	8	9	9	9	9	9	8	9	9	9	9	274160000	322180000	268080000	316970000	281280000	343980000	0.911	1.07	0.89	1.053	0.934	1.142	1.194	4.28E-03
P01033	Metalloproteinase inhibitor 1	TIMP1	22.2	23.171	10.123	18	4	4	2	3	4	3	3	3	4	4	4	3	3	3	4	4	4	3	3	3	99271000	80980000	93626000	91938000	90326000	64558000	1.144	0.933	1.079	1.059	1.041	0.744	0.838	1.43E-01
P01034	Cystatin-C	CST3	13.7	15.799	4.2232	7	2	2	1	2	1	1	1	1	1	2	2	2	1	1	1	2	2	2	1	1	0	87261000	77293000	84801000	0	0		1.05	0.93	1.02			1.113
P01040	Cystatin-A	CSTA	50	11.006	4.6777	10	4	4	2	0	3	3	2	0	4	4	3	4	4	4	4	4	3	4	4	4	70011000	64285000	87025000	70577000	75622000	76599000	0.946	0.868	1.176	0.953	1.022	1.035	0.909	3.14E-01
P01112	GTPase HRas	HRAS	63.5	21.298	12.115	37	9	3	7	5	8	6	6	5	8	8	8	8	8	8	3	3	3	3	3	3	301530000	170620000	279340000	136550000	286190000	154470000	1.362	0.77	1.261	0.617	1.292	0.698	0.532	3.37E-04
P01116	GTPase KRas	KRAS	60.8	21.656	72.208	60	9	4	10	10	10	11	9	10	8	9	8	9	8	9	4	4	4	4	4	4	996360000	1074200000	1084900000	996200000	1033500000	807550000	0.998	1.076	1.086	0.997	1.035	0.809	0.924	3.97E-01
P01130	Low-density lipoprotein receptor	LDLR	15.6	95.375	50.988	45	11	11	5	12	5	8	7	8	9	11	8	7	9	10	9	11	8	7	9	10	279150000	302730000	283210000	328440000	254950000	258070000	0.981	1.064	0.996	1.155	0.896	0.907	1.088	3.44E-01
P01135	Protransforming growth factor alpha	TGFA	11.9	17.006	4.0228	6	2	2	1	0	1	1	1	2	2	0	2	2	2	2	2	0	2	2	2	2	26903000	0	32967000	18982000	27728000	23880000	1.031		1.263	0.728	1.063	0.915	0.734	8.46E-02
P01137	Transforming growth factor beta-1	TGFB1	22.8	44.341	27.294	22	8	8	4	3	5	4	4	2	7	7	7	7	6	7	7	7	7	7	6	7	302300000	331420000	313970000	313940000	343330000	302440000	0.951	1.043	0.988	0.988	1.08	0.951	0.988	8.04E-01
P02462	Collagen alpha-1(IV) chain	COL4A1	1.4	160.61	19.423	11	2	2	1	3	1	2	3	1	2	1	2	2	2	2	2	1	2	2	2	2	64300000	50207000	71049000	57025000	55722000	82121000	1.014	0.792	1.121	0.899	0.879	1.295	0.991	9.60E-01
P02751	Fibronectin	FN1	22	262.62	272.27	279	38	38	49	49	45	51	46	39	35	35	38	36	36	34	35	35	38	36	36	34	5131600000	4136000000	5362500000	4207100000	5341500000	4281100000	1.082	0.872	1.131	0.887	1.126	0.903	0.797	2.23E-04
P02786	Transferrin receptor protein 1	TFRC	49.2	84.87	237.55	335	32	32	53	60	50	60	55	57	31	31	31	31	32	31	31	31	31	31	32	31	9619300000	11631000000	9472200000	11718000000	9621700000	11981000000	0.901	1.09	0.887	1.098	0.901	1.122	1.23	4.27E-05
P02792	Ferritin light chain	FTL	28	20.019	12.721	17	3	3	3	3	3	2	4	2	3	3	3	2	3	1	3	3	3	2	3	1	133740000	134760000	131770000	59687000	153950000	55738000	1.198	1.207	1.181	0.535	1.379	0.499	0.596	1.02E-01
P02794	Ferritin heavy chain	FTH1	60.7	21.225	69.709	75	9	9	16	9	15	12	14	9	9	7	9	6	8	7	9	7	9	6	8	7	1087400000	484630000	1033800000	506880000	889320000	534760000	1.438	0.641	1.367	0.67	1.176	0.707	0.507	1.24E-03
P03905	NADH-ubiquinone oxidoreductase chain 4	MT-ND4	8.3	51.58	23.103	17	3	3	3	3	2	3	3	3	3	3	3	3	3	3	3	3	3	3	3	3	173940000	159490000	167960000	126000000	146810000	162540000	1.114	1.022	1.076	0.807	0.94	1.041	0.917	3.97E-01
P03915	NADH-ubiquinone oxidoreductase chain 5	MT-ND5	10.3	67.026	44.382	43	4	4	7	7	7	7	6	9	4	4	4	4	4	4	4	4	4	4	4	4	193570000	204280000	212170000	193340000	221710000	185750000	0.959	1.012	1.051	0.958	1.099	0.92	0.93	2.10E-01
P03928	ATP synthase protein 8	MT-ATP8	48.5	7.9916	7.9158	46	3	3	6	7	8	8	7	10	3	3	3	3	3	3	3	3	3	3	3	3	620840000	651800000	583580000	588560000	693290000	536930000	1.014	1.064	0.953	0.961	1.132	0.877	0.937	4.35E-01
P04035	3-hydroxy-3-methylglutaryl-coenzyme A reductase	HMGCR	22.4	97.475	60.996	36	16	16	0	10	1	9	2	14	5	13	6	14	8	15	5	13	6	14	8	15	143100000	390460000	117570000	343880000	99659000	397130000	0.576	1.57	0.473	1.383	0.401	1.597	3.14	2.57E-04
P04040	Catalase	CAT	51.4	59.755	168.57	149	21	21	27	27	22	25	24	24	19	18	17	18	18	18	19	18	17	18	18	18	2347800000	2199200000	2359100000	2174700000	2488300000	2342400000	1.013	0.949	1.017	0.938	1.073	1.01	0.933	8.18E-02
P04049	RAF proto-oncogene serine/threonine-protein kinase	RAF1	4.3	73.051	8.652	6	2	2	0	1	1	2	1	1	2	1	2	2	2	2	2	1	2	2	2	2	27036000	0	28587000	37483000	26538000	37956000	0.858		0.907	1.189	0.842	1.204	1.377	1.06E-03
P04062	Glucosylceramidase	GBA	26.3	59.716	39.166	38	11	11	8	8	5	5	7	5	9	11	8	9	9	8	9	11	8	9	9	8	316280000	275200000	270560000	257500000	366470000	341970000	1.038	0.903	0.888	0.845	1.203	1.122	0.918	5.26E-01
P04075	Fructose-bisphosphate aldolase A	ALDOA	83.5	39.42	290.32	388	27	20	63	69	59	67	63	67	25	27	26	27	26	26	19	20	20	20	20	19	22986000000	22144000000	22328000000	23470000000	22233000000	23277000000	1.011	0.974	0.982	1.032	0.978	1.024	1.02	4.00E-01
P04080	Cystatin-B	CSTB	70.4	11.139	48.732	58	4	4	10	8	9	11	9	11	4	4	4	4	4	4	4	4	4	4	4	4	1137400000	928170000	818620000	1034300000	898660000	847630000	1.205	0.983	0.867	1.096	0.952	0.898	0.984	8.99E-01
P04083	Annexin A1	ANXA1	72.3	38.714	242.16	319	25	25	46	59	47	57	47	63	24	25	25	25	25	25	24	25	25	25	25	25	16394000000	24986000000	16324000000	25204000000	16133000000	24909000000	0.794	1.209	0.79	1.22	0.781	1.206	1.537	9.86E-08
P04114	Apolipoprotein B-100	APOB	2	515.6	17.123	35	9	7	4	6	5	7	6	7	9	9	9	9	9	9	7	7	7	7	7	7	261190000	247500000	272170000	259270000	266720000	282670000	0.986	0.934	1.027	0.979	1.007	1.067	0.987	7.59E-01
P04150	Glucocorticoid receptor	NR3C1	6.6	85.658	23.065	12	3	3	2	3	2	1	2	2	2	3	2	3	3	2	2	3	2	3	3	2	35810000	33195000	37506000	33014000	33265000	36083000	1.029	0.954	1.077	0.948	0.956	1.037	0.96	4.18E-01
P04156	Major prion protein	PRNP	27.7	27.661	32.814	44	7	7	7	8	7	8	8	6	7	6	5	6	7	6	7	6	5	6	7	6	555570000	498400000	482870000	480590000	499340000	500760000	1.105	0.991	0.96	0.956	0.993	0.996	0.962	4.46E-01
P04179	Superoxide dismutase [Mn], mitochondrial	SOD2	71.6	24.722	79.076	68	10	10	11	12	11	13	10	11	10	9	10	10	9	9	10	9	10	10	9	9	2792100000	2497400000	2791200000	2489500000	3088100000	2375600000	1.045	0.935	1.044	0.932	1.156	0.889	0.849	1.48E-02
P04181	Ornithine aminotransferase, mitochondrial	OAT	71.3	48.534	211.36	271	21	21	50	45	44	44	42	46	21	20	20	20	19	20	21	20	20	20	19	20	12246000000	12659000000	12664000000	12355000000	12600000000	12276000000	0.982	1.015	1.016	0.991	1.011	0.985	0.994	6.96E-01
P04183	Thymidine kinase, cytosolic	TK1	19.7	25.468	19.874	19	4	4	3	5	3	2	3	3	3	4	3	3	3	4	3	4	3	3	3	4	148910000	181510000	148310000	194060000	151760000	153120000	0.914	1.114	0.91	1.191	0.931	0.94	1.178	1.60E-01
P04350	Tubulin beta-4A chain	TUBB4A	64.6	49.585	20.74	12	19	0	2	2	2	2	2	2	18	19	18	19	18	19	0	0	0	0	0	0	65265000	142890000	68636000	204390000	80924000	117350000	0.576	1.262	0.606	1.805	0.715	1.036	2.163	3.39E-02
P04406	Glyceraldehyde-3-phosphate dehydrogenase	GAPDH	80	36.053	207.42	684	19	19	113	103	112	107	121	128	18	19	18	19	19	17	18	19	18	19	19	17	48600000000	57879000000	56134000000	59894000000	49112000000	60340000000	0.878	1.046	1.015	1.083	0.888	1.091	1.158	3.36E-02
P04424	Argininosuccinate lyase	ASL	23.5	51.657	29.26	38	10	10	7	7	6	9	4	5	10	8	9	8	7	8	10	8	9	8	7	8	200690000	236700000	214180000	212120000	222050000	243510000	0.906	1.068	0.967	0.957	1.002	1.099	1.087	1.80E-01
P04626	Receptor tyrosine-protein kinase erbB-2	ERBB2	5.9	137.91	8.956	13	6	3	2	2	3	4	0	2	6	4	6	6	5	6	3	2	3	3	2	3	49298000	46567000	39863000	61212000	36599000	51908000	1.036	0.979	0.838	1.287	0.769	1.091	1.27	1.20E-01
P04632	Calpain small subunit 1	CAPNS1	54.9	28.315	59.065	55	10	10	7	12	8	9	8	11	10	10	9	8	9	10	10	10	9	8	9	10	1095400000	1141300000	1035700000	1395600000	1137800000	1307500000	0.924	0.963	0.874	1.177	0.96	1.103	1.176	7.51E-02
P04637	Cellular tumor antigen p53	TP53	25.2	43.653	17.048	30	8	8	5	5	4	7	4	5	5	6	6	6	6	7	5	6	6	6	6	7	200750000	181040000	181830000	183600000	174460000	182750000	1.091	0.984	0.988	0.997	0.948	0.993	0.983	7.22E-01
P04792	Heat shock protein beta-1	HSPB1	84.9	22.782	120.42	198	16	16	26	34	32	36	31	39	16	16	16	16	16	16	16	16	16	16	16	16	9041900000	12442000000	9686600000	11861000000	9052400000	13262000000	0.83	1.142	0.889	1.089	0.831	1.218	1.352	2.08E-03
P04818	Thymidylate synthase	TYMS	18.2	35.716	16.549	15	4	4	4	2	2	2	3	2	4	3	3	4	3	3	4	3	3	4	3	3	105680000	110090000	127210000	99422000	128930000	97670000	0.948	0.987	1.141	0.892	1.156	0.876	0.849	9.68E-02
P04843	Dolichyl-diphosphooligosaccharide--protein glycosyltransferase subunit 1	RPN1	61.4	68.569	271.51	352	32	32	56	59	54	62	61	60	32	32	31	32	32	30	32	32	31	32	32	30	16349000000	13883000000	16010000000	14886000000	16014000000	14624000000	1.069	0.908	1.047	0.973	1.047	0.956	0.897	6.62E-03
P04844	Dolichyl-diphosphooligosaccharide--protein glycosyltransferase subunit 2	RPN2	62	69.283	323.31	296	25	25	47	55	45	51	49	49	25	24	24	24	24	24	25	24	24	24	24	24	10791000000	11580000000	11602000000	11371000000	11016000000	11499000000	0.954	1.024	1.026	1.005	0.974	1.017	1.031	2.36E-01
P04899	Guanine nucleotide-binding protein G(i) subunit alpha-2	GNAI2	56.3	40.45	169.24	194	15	8	34	31	35	29	36	29	15	14	15	15	15	15	8	8	8	8	8	8	6498400000	4789700000	6318500000	4507100000	6294500000	3966700000	1.204	0.888	1.171	0.835	1.167	0.735	0.694	1.46E-03
P04920	Anion exchange protein 2	SLC4A2	4.4	137.01	23.038	8	2	2	1	2	0	1	2	2	2	2	1	1	2	2	2	2	1	1	2	2	29941000	43835000	0	38057000	45539000	44129000	0.743	1.088		0.944	1.13	1.095	1.113	5.50E-01
P05023	Sodium/potassium-transporting ATPase subunit alpha-1	ATP1A1	50.9	112.89	323.31	615	50	32	100	100	106	101	105	103	49	48	50	48	50	47	31	30	32	30	32	29	29297000000	25669000000	29456000000	25351000000	28324000000	26608000000	1.067	0.935	1.073	0.924	1.032	0.969	0.891	3.68E-03
P05026	Sodium/potassium-transporting ATPase subunit beta-1	ATP1B1	38.3	35.061	25.755	79	10	10	13	16	13	10	11	16	10	10	10	9	9	10	10	10	10	9	9	10	2008400000	1584000000	1852400000	1728200000	1901200000	1579000000	1.131	0.892	1.043	0.973	1.071	0.889	0.849	1.25E-02
P05067	Amyloid beta A4 protein	APP	35.6	86.942	100.04	95	20	20	12	18	15	17	16	17	16	18	16	18	18	17	16	18	16	18	18	17	600410000	794200000	572190000	885640000	617090000	888040000	0.827	1.094	0.788	1.219	0.85	1.223	1.435	1.50E-03
P05091	Aldehyde dehydrogenase, mitochondrial	ALDH2	13.9	56.381	12.041	14	5	4	1	3	2	2	3	3	3	4	5	4	4	4	2	3	4	3	3	3	61350000	53273000	51611000	59839000	44312000	55173000	1.131	0.982	0.951	1.103	0.817	1.017	1.07	5.27E-01
P05120	Plasminogen activator inhibitor 2	SERPINB2	4.6	46.596	11.069	10	1	1	1	2	2	2	1	2	1	1	1	1	1	1	1	1	1	1	1	1	0	24359000	19929000	24366000	16217000	27088000		1.088	0.89	1.088	0.724	1.21	1.398	2.86E-02
P05121	Plasminogen activator inhibitor 1	SERPINE1	28.1	45.059	48.379	27	8	8	2	10	0	7	2	6	5	8	4	8	4	8	5	8	4	8	4	8	159750000	320220000	128220000	269480000	121670000	315320000	0.729	1.461	0.585	1.23	0.555	1.439	2.209	1.16E-03
P05141	ADP/ATP translocase 2	SLC25A5	48.3	32.852	126.94	278	18	7	46	53	45	42	45	47	18	18	18	18	18	18	7	7	7	7	7	7	41216000000	36338000000	39637000000	37209000000	42730000000	39665000000	1.044	0.921	1.004	0.943	1.083	1.005	0.916	6.11E-02
P05165	Propionyl-CoA carboxylase alpha chain, mitochondrial	PCCA	28.2	80.058	58.075	62	15	15	14	5	10	10	12	11	14	13	11	14	14	14	14	13	11	14	14	14	519090000	475710000	532980000	445280000	525730000	480220000	1.045	0.958	1.073	0.897	1.059	0.967	0.888	7.28E-03
P05166	Propionyl-CoA carboxylase beta chain, mitochondrial	PCCB	38.8	58.215	55.187	53	14	14	8	9	8	9	10	9	10	10	10	11	12	9	10	10	10	11	12	9	281710000	249260000	292480000	250710000	308540000	277420000	1.018	0.901	1.057	0.906	1.115	1.003	0.881	4.32E-02
P05187	Alkaline phosphatase, placental type	ALPP	6.5	57.953	5.8607	5	3	3	2	0	2	0	1	0	3	2	3	2	3	2	3	2	3	2	3	2	40346000	36112000	36168000	34492000	29370000	33026000	1.155	1.034	1.036	0.988	0.841	0.946	0.979	8.32E-01
P05198	Eukaryotic translation initiation factor 2 subunit 1	EIF2S1	64.4	36.112	246.91	182	22	22	25	38	25	34	26	34	21	20	22	20	22	22	21	20	22	20	22	22	6185100000	7001400000	5942000000	7245200000	6072000000	7637400000	0.926	1.048	0.889	1.085	0.909	1.143	1.202	3.44E-03
P05362	Intercellular adhesion molecule 1	ICAM1	37	57.825	89.408	88	15	15	15	14	15	15	15	14	14	13	15	14	14	14	14	13	15	14	14	14	1232500000	938880000	1223500000	913650000	1299500000	963320000	1.125	0.857	1.117	0.834	1.187	0.88	0.75	3.60E-04
P05386	60S acidic ribosomal protein P1	RPLP1	94.7	11.514	62.567	70	5	4	12	14	10	9	11	14	5	5	5	5	5	4	4	4	4	4	4	3	3532200000	4809000000	3201100000	5463800000	3148300000	5481100000	0.827	1.126	0.749	1.279	0.737	1.283	1.594	1.48E-03
P05387	60S acidic ribosomal protein P2	RPLP2	92.2	11.665	88.803	136	9	8	23	27	20	19	23	24	9	9	9	9	9	9	8	8	8	8	8	8	12340000000	14591000000	13286000000	13706000000	12975000000	14408000000	0.911	1.077	0.98	1.011	0.957	1.063	1.106	2.42E-02
P05388	60S acidic ribosomal protein P0	RPLP0	44.8	34.273	77.16	100	10	10	15	16	18	19	16	16	10	10	10	10	10	10	10	10	10	10	10	10	7454900000	9666700000	7749400000	9730700000	7975700000	9518700000	0.859	1.113	0.893	1.121	0.919	1.096	1.247	3.02E-04
P05412	Transcription factor AP-1	JUN	19	35.675	16.028	16	4	3	3	3	1	4	2	3	4	4	2	4	3	3	3	3	2	3	2	3	58686000	144190000	64961000	152600000	57560000	128060000	0.581	1.427	0.643	1.511	0.57	1.268	2.345	4.23E-04
P05423	DNA-directed RNA polymerase III subunit RPC4	POLR3D	7.8	44.395	5.237	10	3	3	2	1	2	3	1	1	3	2	2	3	2	2	3	2	2	3	2	2	115520000	99505000	110080000	128460000	98440000	89027000	1.081	0.931	1.03	1.202	0.921	0.833	0.978	8.64E-01
P05455	Lupus La protein	SSB	47.3	46.836	113.53	163	21	21	25	27	24	32	26	29	19	18	18	19	20	20	19	18	18	19	20	20	2957500000	3458200000	2967800000	3513300000	3335700000	3494300000	0.9	1.052	0.903	1.069	1.015	1.063	1.13	8.53E-02
P05534	HLA class I histocompatibility antigen, A-24 alpha chain	HLA-A	50.1	40.688	179.21	173	16	2	30	30	29	29	28	27	16	16	16	15	16	16	2	2	2	2	2	2	6686100000	5884600000	6054100000	5995200000	6392200000	6142900000	1.08	0.95	0.978	0.968	1.032	0.992	0.942	1.34E-01
P05549	Transcription factor AP-2-alpha	TFAP2A	18.1	48.062	25.436	29	6	6	7	4	7	2	5	4	6	6	6	5	6	5	6	6	6	5	6	5	181180000	130770000	209500000	182590000	207380000	160140000	1.014	0.732	1.173	1.022	1.161	0.897	0.792	7.72E-02
P05556	Integrin beta-1	ITGB1	32.8	88.414	79.777	168	19	19	27	28	31	28	29	25	17	15	16	16	18	15	17	15	16	16	18	15	5212000000	5162300000	5660400000	4928300000	5166000000	5033200000	1.004	0.994	1.09	0.949	0.995	0.969	0.943	1.50E-01
P06132	Uroporphyrinogen decarboxylase	UROD	40.6	40.786	48.998	20	9	9	3	5	3	1	4	4	4	7	6	6	7	6	4	7	6	6	7	6	125430000	105610000	175430000	118040000	146950000	136180000	0.932	0.785	1.303	0.877	1.092	1.012	0.804	1.59E-01
P06280	Alpha-galactosidase A	GLA	30.3	48.766	59.577	62	10	10	12	9	12	11	11	7	10	9	10	8	9	9	10	9	10	8	9	9	647880000	551860000	629800000	592840000	637260000	592800000	1.064	0.907	1.035	0.974	1.047	0.974	0.907	1.56E-02
P06396	Gelsolin	GSN	28.6	85.696	119.15	80	16	6	11	15	11	14	10	19	15	14	13	14	15	15	6	5	5	5	6	6	499680000	1052400000	550640000	927810000	600590000	982550000	0.65	1.369	0.716	1.207	0.781	1.278	1.795	7.02E-04
P06400	Retinoblastoma-associated protein	RB1	10.5	106.16	32.442	31	7	7	3	7	3	6	5	7	4	6	4	6	6	5	4	6	4	6	6	5	128930000	163980000	133480000	190310000	147100000	167310000	0.831	1.057	0.86	1.226	0.948	1.078	1.274	1.96E-02
P06493	Cyclin-dependent kinase 1	CDK1	72.4	34.095	59.245	107	17	16	16	20	16	18	19	18	16	16	15	17	16	16	15	15	14	16	15	15	943930000	1109900000	1027100000	1087100000	969030000	1049400000	0.915	1.076	0.996	1.054	0.94	1.018	1.104	2.80E-02
P06576	ATP synthase subunit beta, mitochondrial	ATP5B	76.6	56.559	323.31	601	26	26	91	107	101	107	96	99	26	26	26	26	26	24	26	26	26	26	26	24	41497000000	42749000000	43644000000	47121000000	47024000000	43239000000	0.939	0.967	0.987	1.066	1.064	0.978	1.007	8.89E-01
P06703	Protein S100-A6	S100A6	43.3	10.18	5.9087	16	4	4	2	4	2	2	3	3	4	4	4	4	4	3	4	4	4	4	4	3	315210000	468420000	307500000	438730000	301160000	403580000	0.846	1.258	0.826	1.178	0.809	1.084	1.419	2.54E-03
P06730	Eukaryotic translation initiation factor 4E	EIF4E	37.8	25.097	20.062	39	7	7	7	7	5	7	7	6	5	6	6	7	6	6	5	6	6	7	6	6	489840000	459190000	439550000	538780000	412980000	504320000	1.033	0.969	0.927	1.136	0.871	1.064	1.119	1.74E-01
P06733	Alpha-enolase	ENO1	65.4	47.168	291.09	357	21	19	52	67	53	68	53	64	20	21	21	21	21	21	18	19	19	19	19	19	17852000000	20829000000	18468000000	20457000000	17663000000	21093000000	0.921	1.074	0.952	1.055	0.911	1.088	1.156	7.82E-04
P06737	Glycogen phosphorylase, liver form	PYGL	52.4	97.147	169.4	257	42	36	43	46	39	44	41	44	40	40	41	41	39	40	35	35	36	35	34	35	2830800000	3053300000	2940800000	3221700000	3051400000	3128700000	0.932	1.005	0.968	1.061	1.004	1.03	1.066	7.32E-02
P06744	Glucose-6-phosphate isomerase	GPI	47.7	63.146	201.07	196	19	14	31	34	39	31	29	32	19	19	19	19	19	19	14	14	14	14	14	14	6274900000	6771100000	6131600000	6433000000	6061900000	7002300000	0.973	1.05	0.951	0.998	0.94	1.086	1.094	3.06E-02
P06748	Nucleophosmin	NPM1	60.5	32.575	311.53	472	15	15	74	85	74	87	80	72	15	15	15	14	15	15	15	15	15	14	15	15	78150000000	79068000000	75257000000	78769000000	74673000000	77168000000	1.013	1.024	0.975	1.021	0.968	1	1.03	1.33E-01
P06753	Tropomyosin alpha-3 chain	TPM3	38.9	32.95	23.014	70	13	5	11	11	12	12	13	11	13	13	13	12	13	11	5	5	5	5	5	4	3587700000	3269400000	3862500000	3066900000	3616600000	3287900000	1.04	0.948	1.12	0.889	1.049	0.953	0.87	1.28E-02
P06756	Integrin alpha-V	ITGAV	26.6	116.04	88.933	93	23	23	19	11	19	14	16	14	22	19	21	19	19	21	22	19	21	19	19	21	818270000	719180000	802800000	697880000	758610000	724610000	1.086	0.954	1.065	0.926	1.007	0.962	0.9	1.56E-02
P06865	Beta-hexosaminidase subunit alpha	HEXA	25.7	60.702	40.408	78	14	14	16	13	13	12	12	12	14	14	14	13	13	12	14	14	14	13	13	12	731510000	518850000	604150000	537020000	654800000	607230000	1.201	0.852	0.992	0.882	1.075	0.997	0.836	7.57E-02
P07099	Epoxide hydrolase 1	EPHX1	41.5	52.948	123.33	71	14	14	9	11	14	10	13	14	12	11	13	12	12	11	12	11	13	12	12	11	455590000	417030000	446400000	487490000	483990000	507540000	0.977	0.894	0.957	1.045	1.038	1.088	1.019	7.84E-01
P07108	Acyl-CoA-binding protein	DBI	50.6	10.044	14.391	30	5	5	4	5	5	6	6	4	4	3	5	4	4	4	4	3	5	4	4	4	397910000	355970000	371880000	403900000	378100000	431270000	1.021	0.913	0.954	1.036	0.97	1.106	1.038	5.71E-01
P07195	L-lactate dehydrogenase B chain	LDHB	54.8	36.638	162.41	238	18	17	37	40	36	42	37	46	18	18	18	18	18	18	17	17	17	17	17	17	17125000000	18751000000	18288000000	18623000000	17511000000	18698000000	0.943	1.032	1.007	1.025	0.964	1.029	1.059	9.28E-02
P07199	Major centromere autoantigen B	CENPB	12.2	65.171	27.816	14	5	5	1	3	4	2	2	2	5	5	4	4	4	4	5	5	4	4	4	4	98589000	68992000	79998000	80545000	86755000	77647000	1.201	0.84	0.975	0.981	1.057	0.946	0.856	1.20E-01
P07203	Glutathione peroxidase 1	GPX1	68	22.088	57.544	84	12	12	14	14	13	15	16	12	12	12	12	12	12	12	12	12	12	12	12	12	1400600000	1430400000	1351500000	1468200000	1392100000	1675200000	0.964	0.984	0.93	1.01	0.958	1.153	1.104	1.39E-01
P07237	Protein disulfide-isomerase	P4HB	67.9	57.116	256.62	410	35	35	66	68	70	66	75	65	33	34	34	34	33	32	33	34	34	34	33	32	23576000000	20903000000	23527000000	20810000000	23874000000	21725000000	1.052	0.933	1.05	0.929	1.066	0.97	0.894	1.26E-03
P07305	Histone H1.0	H1F0	15.5	20.863	5.06	8	3	3	2	0	2	2	2	0	3	3	3	3	3	3	3	3	3	3	3	3	287410000	359540000	318660000	352170000	277300000	342410000	0.89	1.113	0.987	1.091	0.859	1.06	1.193	1.32E-02
P07339	Cathepsin D	CTSD	48.5	44.552	76.132	131	15	15	22	18	24	20	24	23	14	14	14	15	15	13	14	14	14	15	15	13	2780400000	2615600000	2843500000	2888600000	2858000000	2610600000	1.005	0.946	1.028	1.044	1.033	0.944	0.957	2.67E-01
P07355	Annexin A2	ANXA2	74.6	38.604	323.31	518	30	30	79	90	79	97	77	96	30	28	30	29	30	28	30	28	30	29	30	28	92282000000	1.3014E+11	93022000000	1.2074E+11	91557000000	1.223E+11	0.852	1.201	0.859	1.114	0.845	1.129	1.348	8.28E-03
P07384	Calpain-1 catalytic subunit	CAPN1	41.5	81.889	124.64	161	26	26	26	25	22	30	28	30	24	26	24	25	24	25	24	26	24	25	24	25	1974000000	2284000000	1947200000	2311200000	1982100000	2411100000	0.917	1.062	0.905	1.074	0.921	1.121	1.187	7.81E-04
P07437	Tubulin beta chain	TUBB	70	49.67	70.977	189	21	4	25	35	28	43	24	34	20	21	20	21	20	21	4	4	4	4	4	4	14987000000	20903000000	15270000000	20457000000	13824000000	18174000000	0.868	1.21	0.884	1.185	0.801	1.052	1.351	5.70E-03
P07602	Prosaposin	PSAP	36.5	58.112	38.797	104	16	16	17	15	17	20	18	17	13	13	13	14	14	13	13	13	13	14	14	13	2198600000	2676900000	2391400000	2604000000	2400300000	2993300000	0.864	1.052	0.94	1.024	0.943	1.177	1.184	3.49E-02
P07686	Beta-hexosaminidase subunit beta	HEXB	43.9	63.111	85.125	136	19	19	22	23	24	20	22	25	19	18	18	19	19	19	19	18	18	19	19	19	2918800000	2670300000	2884500000	2614500000	2818800000	2387800000	1.075	0.983	1.062	0.963	1.038	0.879	0.89	2.56E-02
P07741	Adenine phosphoribosyltransferase	APRT	57.2	19.608	33.136	36	7	7	4	8	7	6	3	8	6	6	6	6	6	6	6	6	6	6	6	6	319650000	342280000	299840000	322730000	282100000	339750000	1.006	1.077	0.944	1.016	0.888	1.069	1.114	5.09E-02
P07814	Bifunctional glutamate/proline--tRNA ligase	EPRS	56.9	170.59	323.31	593	65	65	94	102	97	99	99	102	61	62	61	62	63	61	61	62	61	62	63	61	12394000000	13184000000	12929000000	12558000000	12846000000	13128000000	0.965	1.027	1.007	0.978	1	1.022	1.018	4.20E-01
P07858	Cathepsin B	CTSB	30.4	37.821	112.5	66	8	8	13	10	12	10	8	13	8	7	8	8	8	8	8	7	8	8	8	8	1372000000	1429000000	1624400000	1322400000	1389100000	1406900000	0.964	1.004	1.141	0.929	0.976	0.988	0.948	4.36E-01
P07900	Heat shock protein HSP 90-alpha	HSP90AA1	60.5	84.659	323.31	785	42	26	123	144	124	138	118	138	42	42	42	41	41	41	26	26	26	26	25	26	57037000000	61712000000	58508000000	60714000000	57583000000	60554000000	0.961	1.04	0.986	1.023	0.97	1.02	1.057	4.26E-03
P07910	Heterogeneous nuclear ribonucleoproteins C1/C2	HNRNPC	59.2	33.67	90.081	311	18	18	54	46	53	51	55	52	18	18	18	18	18	18	18	18	18	18	18	18	30779000000	29987000000	31283000000	28741000000	30524000000	31502000000	1.01	0.984	1.027	0.943	1.002	1.034	0.975	3.97E-01
P07919	Cytochrome b-c1 complex subunit 6, mitochondrial	UQCRH	37.4	10.739	74.353	41	4	4	7	8	6	7	6	7	4	4	4	4	4	4	4	4	4	4	4	4	3163300000	2535900000	2710100000	2465400000	3622400000	2503100000	1.116	0.895	0.956	0.87	1.278	0.883	0.79	1.29E-01
P07942	Laminin subunit beta-1	LAMB1	29.7	198.04	251.51	215	39	39	41	32	42	30	40	30	38	34	35	32	37	32	38	34	35	32	37	32	2298800000	1742400000	2355500000	1707500000	2319000000	1671400000	1.14	0.864	1.169	0.847	1.15	0.829	0.734	1.99E-05
P07947	Tyrosine-protein kinase Yes	YES1	38.9	60.801	149.17	84	16	12	10	15	15	17	13	14	15	14	15	15	15	14	11	10	11	11	11	10	949640000	789360000	958240000	782590000	928570000	892480000	1.075	0.893	1.085	0.886	1.051	1.01	0.869	2.77E-02
P07948	Tyrosine-protein kinase Lyn	LYN	41	58.573	51.427	75	17	15	8	10	13	12	15	17	13	12	15	14	14	15	11	10	13	12	12	13	918290000	810500000	911290000	766460000	860960000	873270000	1.072	0.946	1.064	0.895	1.005	1.019	0.911	8.93E-02
P07951	Tropomyosin beta chain	TPM2	22.9	32.85	8.6117	12	9	0	3	2	2	2	1	2	9	9	9	9	9	9	0	0	0	0	0	0	652550000	461520000	611020000	484410000	571640000	506590000	1.191	0.842	1.115	0.884	1.043	0.925	0.791	8.84E-03
P07954	Fumarate hydratase, mitochondrial	FH	62.5	54.636	162.35	174	22	22	26	30	28	33	29	28	22	22	22	22	21	20	22	22	22	22	21	20	6533800000	5707100000	6389800000	5943700000	6881200000	6470900000	1.034	0.903	1.011	0.94	1.089	1.024	0.915	1.05E-01
P08047	Transcription factor Sp1	SP1	7.9	80.692	55.844	20	4	4	4	3	4	2	4	3	4	4	3	2	3	3	4	4	3	2	3	3	156100000	126770000	158470000	122200000	152140000	131800000	1.105	0.898	1.122	0.865	1.077	0.933	0.816	1.00E-03
P08069	Insulin-like growth factor 1 receptor	IGF1R	6.2	154.79	6.5105	15	6	6	4	2	4	2	1	2	5	5	6	4	5	4	5	5	6	4	5	4	390100000	361240000	431980000	394960000	345100000	383910000	1.014	0.939	1.123	1.027	0.897	0.998	0.977	7.55E-01
P08134	Rho-related GTP-binding protein RhoC	RHOC	65.3	22.006	6.0998	7	9	2	1	2	1	1	1	1	9	8	8	8	8	7	2	2	1	2	1	1	135120000	208580000	0	124800000	0	0	0.865	1.336		0.799			1.234
P08174	Complement decay-accelerating factor	CD55	22	41.4	15.311	10	6	6	0	3	1	2	2	2	3	4	3	3	4	5	3	4	3	3	4	5	0	0	61023000	0	0	97993000			0.768			1.232	1.606
P08195	4F2 cell-surface antigen heavy chain	SLC3A2	57.3	67.993	323.31	489	33	33	84	79	80	81	84	81	32	33	33	30	33	33	32	33	33	30	33	33	60647000000	55046000000	62899000000	58323000000	61729000000	60783000000	1.012	0.919	1.05	0.974	1.03	1.015	0.94	1.06E-01
P08236	Beta-glucuronidase	GUSB	14.6	74.731	29.297	26	6	6	4	6	4	3	4	5	6	6	6	6	6	6	6	6	6	6	6	6	201670000	205900000	203050000	174860000	224590000	214550000	0.988	1.009	0.995	0.857	1.1	1.051	0.946	4.68E-01
P08237	ATP-dependent 6-phosphofructokinase, muscle type	PFKM	22.1	85.182	41.77	51	14	11	6	9	8	8	7	13	13	11	11	11	12	12	10	8	8	8	9	9	1359400000	1213200000	1473300000	1318900000	1422500000	1322600000	1.006	0.898	1.09	0.976	1.052	0.979	0.906	5.18E-02
P08238	Heat shock protein HSP 90-beta	HSP90AB1	61.2	83.263	298.12	469	42	26	75	81	74	80	78	81	40	41	39	40	39	41	24	25	23	25	23	26	22299000000	24259000000	20767000000	24932000000	21866000000	23501000000	0.972	1.058	0.905	1.087	0.953	1.025	1.12	1.37E-02
P08240	Signal recognition particle receptor subunit alpha	SRPRA	59.7	69.81	207.05	245	30	30	47	42	38	40	44	34	29	29	28	30	29	28	29	29	28	30	29	28	4415300000	4014100000	4690600000	4177000000	4468400000	4288800000	1.017	0.924	1.08	0.962	1.029	0.988	0.919	3.47E-02
P08243	Asparagine synthetase [glutamine-hydrolyzing]	ASNS	30.1	64.369	50.206	82	14	14	15	14	15	11	12	15	14	13	13	13	13	13	14	13	13	13	13	13	960640000	1102900000	1041800000	1113000000	1037000000	1095000000	0.908	1.042	0.984	1.052	0.98	1.035	1.089	2.79E-02
P08397	Porphobilinogen deaminase	HMBS	15.5	39.33	20.5	22	5	5	4	3	5	3	3	4	4	4	5	4	4	4	4	4	5	4	4	4	92501000	101950000	94242000	106900000	103050000	116610000	0.902	0.994	0.919	1.042	1.005	1.137	1.123	9.26E-02
P08559	Pyruvate dehydrogenase E1 component subunit alpha, somatic form, mitochondrial	PDHA1	58.5	43.295	166.7	168	19	19	27	27	29	32	26	27	19	18	18	19	19	19	19	18	18	19	19	19	4238700000	3960500000	4710300000	3609100000	4044300000	4053300000	1.033	0.965	1.148	0.88	0.986	0.988	0.895	1.29E-01
P08572	Collagen alpha-2(IV) chain	COL4A2	1.6	167.55	6.9656	12	2	2	2	2	2	2	2	2	2	2	2	2	2	2	2	2	2	2	2	2	47451000	30839000	32646000	37658000	37610000	39483000	1.262	0.82	0.868	1.001	1	1.05	0.917	5.58E-01
P08574	Cytochrome c1, heme protein, mitochondrial	CYC1	37.5	35.422	133.77	86	11	11	12	15	15	14	12	18	10	11	11	11	11	11	10	11	11	11	11	11	2409200000	2291700000	2270900000	2296600000	2250600000	2143700000	1.058	1.006	0.997	1.009	0.988	0.941	0.971	4.02E-01
P08579	U2 small nuclear ribonucleoprotein B''	SNRPB2	51.6	25.486	127.35	58	11	9	7	9	10	10	13	9	9	10	10	11	11	10	7	8	8	9	9	8	1769500000	1843100000	1712600000	1863100000	1823200000	1646300000	0.996	1.038	0.964	1.049	1.026	0.927	1.009	8.46E-01
P08581	Hepatocyte growth factor receptor	MET	22.9	155.54	78.657	88	25	24	15	10	21	17	15	10	22	16	23	19	22	18	21	15	22	18	21	17	797660000	573730000	809380000	613430000	852280000	610950000	1.124	0.809	1.141	0.865	1.201	0.861	0.731	4.62E-04
P08582	Melanotransferrin	MELTF	57	80.214	277.15	181	29	29	30	30	31	31	30	29	27	29	28	27	28	29	27	29	28	27	28	29	1983000000	1934000000	2241300000	1844300000	1934700000	1970800000	0.999	0.974	1.129	0.929	0.975	0.993	0.933	2.53E-01
P08621	U1 small nuclear ribonucleoprotein 70 kDa	SNRNP70	43	51.556	85.399	158	18	18	26	28	22	29	23	30	18	17	17	16	16	17	18	17	17	16	16	17	6238600000	5382700000	5820400000	5130300000	5598300000	5990300000	1.096	0.945	1.022	0.901	0.983	1.052	0.935	2.91E-01
P08648	Integrin alpha-5	ITGA5	9.5	114.54	36.106	19	6	6	3	3	2	3	2	6	2	4	3	4	3	5	2	4	3	4	3	5	105400000	102160000	0	105880000	92773000	116620000	1.008	0.977		1.013	0.887	1.115	1.092	3.00E-01
P08651	Nuclear factor 1 C-type	NFIC	13.8	55.674	36.46	21	6	6	3	2	4	4	5	3	4	4	5	4	5	4	4	4	5	4	5	4	123770000	134870000	126170000	140640000	124880000	88446000	1.005	1.095	1.025	1.142	1.014	0.718	0.971	8.47E-01
P08708	40S ribosomal protein S17	RPS17	57	15.55	57.219	93	9	9	14	15	15	16	15	18	8	8	9	9	9	9	8	8	9	9	9	9	2939300000	3772900000	2637800000	3312900000	2547700000	3702800000	0.932	1.197	0.837	1.051	0.808	1.175	1.328	8.78E-03
P08754	Guanine nucleotide-binding protein G(k) subunit alpha	GNAI3	54.5	40.532	108.81	64	14	7	10	11	11	10	12	10	14	13	14	13	13	14	7	7	7	6	6	7	1887600000	1439200000	1945300000	1068400000	1919100000	1180400000	1.2	0.915	1.236	0.679	1.22	0.75	0.641	2.51E-02
P08758	Annexin A5	ANXA5	68.4	35.936	156.77	129	18	18	18	25	19	24	18	25	16	18	15	18	15	18	16	18	15	18	15	18	2423500000	2890700000	2578700000	2977900000	2494600000	2806000000	0.899	1.073	0.957	1.105	0.926	1.041	1.157	4.20E-03
P08865	40S ribosomal protein SA	RPSA	57.6	32.854	179.63	203	14	14	28	39	29	37	32	38	14	13	14	14	14	14	14	13	14	14	14	14	10210000000	13090000000	10305000000	15174000000	10754000000	13115000000	0.843	1.081	0.851	1.253	0.888	1.083	1.323	9.02E-03
P09001	39S ribosomal protein L3, mitochondrial	MRPL3	37.1	38.632	40.806	77	10	10	13	12	14	13	13	12	10	9	10	10	10	10	10	9	10	10	10	10	775850000	819170000	792460000	801720000	831450000	872390000	0.951	1.004	0.972	0.983	1.02	1.07	1.039	3.11E-01
P09012	U1 small nuclear ribonucleoprotein A	SNRPA	42.9	31.279	205.11	101	12	10	18	17	16	17	15	18	11	11	11	11	11	12	9	9	9	9	9	10	3122600000	3123400000	3075000000	3289400000	3030300000	3429300000	0.982	0.983	0.967	1.035	0.953	1.079	1.067	9.09E-02
P09038	Fibroblast growth factor 2	FGF2	10.1	30.77	9.8742	14	3	3	3	2	3	2	3	1	3	3	3	3	3	3	3	3	3	3	3	3	72402000	49665000	69770000	48458000	63233000	45536000	1.245	0.854	1.199	0.833	1.087	0.783	0.699	2.34E-03
P09104	Gamma-enolase	ENO2	26.5	47.268	16.628	13	7	5	3	2	2	2	1	3	6	5	5	5	4	6	4	3	3	3	2	4	57287000	66457000	63577000	65907000	61440000	42209000	0.963	1.117	1.069	1.108	1.033	0.71	0.958	7.69E-01
P09110	3-ketoacyl-CoA thiolase, peroxisomal	ACAA1	47.4	44.292	94.421	70	13	13	11	13	13	12	13	8	11	13	12	12	11	12	11	13	12	12	11	12	703140000	701510000	820350000	705420000	788040000	735880000	0.947	0.945	1.105	0.95	1.061	0.991	0.927	1.99E-01
P09132	Signal recognition particle 19 kDa protein	SRP19	45.8	16.156	23.985	14	4	4	3	1	1	4	2	3	3	3	3	4	3	4	3	3	3	4	3	4	150420000	139780000	125480000	167060000	166080000	134460000	1.022	0.95	0.852	1.135	1.128	0.913	0.998	9.89E-01
P09211	Glutathione S-transferase P	GSTP1	57.6	23.356	164.42	162	11	11	23	30	25	28	24	32	11	11	11	11	11	11	11	11	11	11	11	11	4441200000	5839600000	4653500000	5765100000	4355700000	5760800000	0.865	1.137	0.906	1.122	0.848	1.122	1.291	1.42E-04
P09234	U1 small nuclear ribonucleoprotein C	SNRPC	24.5	17.394	18.301	39	3	3	7	5	7	7	8	5	3	3	3	3	3	3	3	3	3	3	3	3	2058400000	1852900000	2153100000	1971200000	2053300000	2149000000	1.009	0.908	1.056	0.966	1.007	1.054	0.953	3.50E-01
P09382	Galectin-1	LGALS1	91.1	14.716	164.75	269	10	10	46	46	43	45	48	41	10	10	10	10	10	9	10	10	10	10	10	9	28411000000	26240000000	31051000000	26487000000	30833000000	27022000000	1.002	0.926	1.096	0.935	1.088	0.953	0.883	1.60E-02
P09417	Dihydropteridine reductase	QDPR	32.4	25.789	15.303	13	6	6	2	3	2	2	2	2	6	4	5	4	3	6	6	4	5	4	3	6	103550000	136790000	104280000	119190000	139940000	101090000	0.881	1.164	0.888	1.015	1.191	0.861	1.027	8.54E-01
P09429	High mobility group protein B1	HMGB1	40	24.893	100.55	115	12	9	20	18	21	19	20	17	11	11	11	11	12	11	9	9	9	9	9	9	3817800000	3471900000	3857800000	3378800000	3345400000	3322300000	1.081	0.983	1.092	0.957	0.947	0.941	0.923	1.72E-01
P09493	Tropomyosin alpha-1 chain	TPM1	21.5	32.708	7.4226	15	8	2	2	2	4	2	2	3	8	8	8	8	8	8	2	2	2	2	2	2	266950000	139050000	286380000	206080000	227490000	230260000	1.181	0.615	1.267	0.912	1.006	1.019	0.737	1.01E-01
P09496	Clathrin light chain A	CLTA	13.3	27.076	8.9574	19	4	4	3	3	3	4	3	3	4	4	4	4	4	4	4	4	4	4	4	4	146450000	136430000	152400000	123400000	152640000	120540000	1.056	0.984	1.099	0.89	1.101	0.869	0.842	1.10E-02
P09497	Clathrin light chain B	CLTB	27.5	25.19	20.784	39	7	7	9	5	7	6	7	5	7	6	7	6	7	6	7	6	7	6	7	6	1185500000	794370000	1363800000	922360000	1297100000	1050100000	1.076	0.721	1.237	0.837	1.177	0.953	0.719	1.63E-02
P09525	Annexin A4	ANXA4	53.3	35.882	90.619	89	15	15	12	15	11	17	12	22	13	14	13	14	13	15	13	14	13	14	13	15	836700000	1599300000	871840000	1588700000	791680000	1433200000	0.705	1.347	0.735	1.339	0.667	1.208	1.848	2.64E-04
P09543	2',3'-cyclic-nucleotide 3'-phosphodiesterase	CNP	39.4	47.578	102.01	76	14	14	16	7	16	10	19	8	14	11	13	10	13	11	14	11	13	10	13	11	1205100000	603400000	1087200000	615650000	1194300000	606870000	1.361	0.681	1.228	0.695	1.349	0.685	0.524	4.64E-03
P09622	Dihydrolipoyl dehydrogenase, mitochondrial	DLD	53.8	54.177	112.52	180	17	17	27	38	24	33	28	30	16	16	17	17	17	17	16	16	17	17	17	17	6369400000	5596300000	6122100000	5035300000	6722000000	5749000000	1.074	0.943	1.032	0.849	1.133	0.969	0.853	2.74E-02
P09651	Heterogeneous nuclear ribonucleoprotein A1	HNRNPA1	58.6	38.746	161.22	457	21	19	77	75	73	84	77	71	19	17	19	17	19	15	17	15	17	15	17	14	68616000000	64934000000	65025000000	62079000000	67734000000	64297000000	1.048	0.992	0.994	0.949	1.035	0.982	0.95	7.25E-02
P09661	U2 small nuclear ribonucleoprotein A'	SNRPA1	49.4	28.415	80.81	93	13	13	18	14	17	14	18	12	12	13	12	13	13	12	12	13	12	13	13	12	2342800000	2103600000	2013500000	2263100000	2146800000	2363600000	1.062	0.954	0.913	1.026	0.973	1.072	1.035	5.68E-01
P09669	Cytochrome c oxidase subunit 6C	COX6C	38.7	8.7813	6.8215	22	4	4	3	2	4	4	4	5	3	1	4	3	3	2	3	1	4	3	3	2	421710000	0	506800000	419830000	574400000	526380000	0.861		1.035	0.857	1.173	1.075	0.944	7.15E-01
P09758	Tumor-associated calcium signal transducer 2	TACSTD2	39.9	35.709	124.07	190	12	12	35	29	35	27	33	31	12	11	12	11	12	12	12	11	12	11	12	12	14857000000	13190000000	14518000000	13268000000	15124000000	12863000000	1.063	0.944	1.039	0.95	1.083	0.921	0.884	1.30E-03
P09874	Poly [ADP-ribose] polymerase 1	PARP1	46.4	113.08	218.99	246	39	39	43	41	41	38	48	35	36	36	37	37	36	36	36	36	37	37	36	36	3041500000	2919000000	3129700000	2866100000	3100700000	2899400000	1.016	0.975	1.046	0.958	1.036	0.969	0.937	2.92E-03
P09884	DNA polymerase alpha catalytic subunit	POLA1	10.9	165.91	29.218	27	12	12	5	5	5	3	6	3	6	6	8	7	7	7	6	6	8	7	7	7	125190000	127200000	125240000	103270000	117520000	102720000	1.071	1.089	1.072	0.884	1.006	0.879	0.906	2.43E-01
P09960	Leukotriene A-4 hydrolase	LTA4H	44.7	69.284	94.38	108	21	21	14	18	18	19	21	18	20	21	20	21	21	20	20	21	20	21	21	20	951960000	1033800000	972060000	1029300000	1013200000	927710000	0.964	1.046	0.984	1.042	1.026	0.939	1.018	6.71E-01
P09972	Fructose-bisphosphate aldolase C	ALDOC	20.1	39.455	33.201	41	8	1	7	7	8	5	7	7	7	8	7	8	7	8	1	1	1	1	1	1	2497800000	2382800000	2309500000	3330900000	2491300000	3464100000	0.91	0.868	0.841	1.213	0.907	1.261	1.257	1.44E-01
P0C7P0	CDGSH iron-sulfur domain-containing protein 3, mitochondrial	CISD3	22	14.215	4.7506	9	3	3	2	2	1	1	2	1	3	2	2	1	2	2	3	2	2	1	2	2	43567000	76063000	49065000	0	119600000	79067000	0.593	1.035	0.668		1.628	1.076	1.096	8.43E-01
P0CG08	Golgi pH regulator B	GPR89B	13.8	52.916	34.216	20	4	4	3	5	2	4	2	4	2	4	2	4	2	4	2	4	2	4	2	4	79795000	80597000	79650000	85239000	79176000	73774000	1.001	1.011	0.999	1.069	0.993	0.926	1.004	9.30E-01
P0CG12	Chromosome transmission fidelity protein 8 homolog isoform 2	CHTF8	9.2	51.391	6.8052	7	4	4	2	2	0	1	1	1	3	2	3	2	2	2	3	2	3	2	2	2	0	18668000	23049000	23309000	21496000	0		0.863	1.066	1.078	0.994		0.942	6.52E-01
P0DJ07	Protein PET100 homolog, mitochondrial	PET100	13.7	9.1135	3.5545	8	2	2	2	1	1	1	2	1	2	2	2	2	2	2	2	2	2	2	2	2	61536000	0	0	46793000	62737000	0	1.079			0.821	1.1		0.753
P0DMV9	Heat shock 70 kDa protein 1B	HSPA1B	61.5	70.051	221.57	239	28	14	33	45	36	44	40	41	28	27	27	27	26	26	14	13	13	13	12	13	6616900000	8449700000	6877000000	8139400000	6740300000	8310200000	0.88	1.123	0.914	1.082	0.896	1.105	1.231	1.83E-04
P0DN76	Splicing factor U2AF 35 kDa subunit-like protein	U2AF1L5	45	27.872	71.669	66	9	9	13	13	10	9	12	9	9	9	8	9	9	9	9	9	8	9	9	9	1914700000	1985300000	2046200000	1996100000	1907100000	1946800000	0.974	1.01	1.041	1.015	0.97	0.99	1.01	6.95E-01
P10109	Adrenodoxin, mitochondrial	FDX1	14.1	19.393	6.0246	16	3	3	2	2	3	4	3	2	2	2	3	3	3	2	2	2	3	3	3	2	230390000	203300000	312660000	180440000	239510000	181330000	1.026	0.905	1.392	0.803	1.066	0.807	0.722	5.54E-02
P10155	60 kDa SS-A/Ro ribonucleoprotein	TROVE2	14.5	60.67	24.787	39	8	8	6	7	6	7	6	7	7	8	5	6	8	7	7	8	5	6	8	7	132200000	160410000	137420000	140110000	163620000	160300000	0.887	1.077	0.922	0.94	1.098	1.076	1.064	4.81E-01
P10253	Lysosomal alpha-glucosidase	GAA	19.2	105.32	54.508	49	11	11	8	7	9	9	9	7	10	11	10	10	10	10	10	11	10	10	10	10	385620000	396010000	402990000	399770000	400380000	398870000	0.971	0.997	1.014	1.006	1.008	1.004	1.005	7.50E-01
P10301	Ras-related protein R-Ras	RRAS	43.6	23.48	36.608	25	8	6	7	3	4	3	5	3	7	5	4	5	6	4	5	3	3	3	5	3	254650000	141400000	252250000	128670000	232900000	120390000	1.352	0.751	1.339	0.683	1.236	0.639	0.528	2.22E-04
P10321	HLA class I histocompatibility antigen, Cw-7 alpha chain	HLA-C	33.6	40.648	14.586	6	10	1	1	1	2	0	1	1	9	9	9	9	8	9	1	1	1	1	1	1	77210000	44497000	89563000	52986000	53877000	80081000	1.163	0.67	1.349	0.798	0.812	1.207	0.805	3.92E-01
P10398	Serine/threonine-protein kinase A-Raf	ARAF	7.1	67.585	5.6343	14	4	4	2	3	2	2	2	3	4	4	4	4	4	4	4	4	4	4	4	4	52632000	60615000	57538000	63181000	61105000	67121000	0.872	1.004	0.953	1.047	1.012	1.112	1.115	1.02E-01
P10412	Histone H1.4	HIST1H1E	42.5	21.865	6.0125	24	11	3	4	4	3	5	3	5	10	11	9	10	10	10	2	3	1	2	2	2	405520000	446130000	0	338690000	416020000	427010000	0.997	1.097		0.833	1.023	1.05	0.983	8.84E-01
P10515	Dihydrolipoyllysine-residue acetyltransferase component of pyruvate dehydrogenase complex, mitochondrial	DLAT	35.2	68.996	93.566	162	17	17	26	27	27	28	28	26	16	16	17	16	17	17	16	16	17	16	17	17	4870300000	4522100000	4909700000	4975800000	5189400000	4676700000	1.003	0.931	1.011	1.024	1.068	0.963	0.947	1.87E-01
P10586	Receptor-type tyrosine-protein phosphatase F	PTPRF	43.3	212.88	323.31	342	57	57	42	65	50	65	47	73	50	53	48	51	53	53	50	53	48	51	53	53	2908400000	4129800000	2891500000	3995400000	2776400000	4210600000	0.834	1.185	0.83	1.146	0.797	1.208	1.438	7.80E-05
P10599	Thioredoxin	TXN	65.7	11.737	24.116	89	8	8	13	18	14	17	12	15	8	8	8	8	8	8	8	8	8	8	8	8	10430000000	12234000000	9117300000	10851000000	9426700000	11388000000	0.986	1.157	0.862	1.026	0.891	1.077	1.19	3.15E-02
P10606	Cytochrome c oxidase subunit 5B, mitochondrial	COX5B	55.8	13.696	28.316	57	5	5	8	11	9	9	11	9	5	5	5	5	5	5	5	5	5	5	5	5	2092400000	1592800000	1892000000	1624900000	2133800000	1600500000	1.148	0.874	1.038	0.891	1.171	0.878	0.788	2.89E-02
P10619	Lysosomal protective protein	CTSA	19.4	54.465	51.231	52	7	7	9	8	9	9	10	7	5	7	6	7	6	6	5	7	6	7	6	6	858750000	778150000	916680000	741540000	884820000	736010000	1.048	0.95	1.119	0.905	1.08	0.898	0.848	3.20E-03
P10644	cAMP-dependent protein kinase type I-alpha regulatory subunit	PRKAR1A	25.5	42.981	34.334	42	8	7	7	8	7	6	8	6	7	7	8	6	8	6	6	6	7	5	7	5	219100000	215500000	217900000	220800000	218730000	210160000	1.01	0.993	1.004	1.017	1.008	0.968	0.986	4.23E-01
P10768	S-formylglutathione hydrolase	ESD	59.2	31.462	106.29	73	12	12	13	12	9	14	9	16	11	10	10	11	11	12	11	10	10	11	11	12	1058600000	1164200000	1134300000	1177800000	1151900000	1092700000	0.937	1.03	1.004	1.042	1.019	0.967	1.027	4.84E-01
P10809	60 kDa heat shock protein, mitochondrial	HSPD1	78.4	61.054	323.31	1229	41	41	214	207	198	200	205	205	40	41	40	40	41	39	40	41	40	40	41	39	93773000000	95652000000	92994000000	92809000000	93392000000	94851000000	0.999	1.019	0.99	0.988	0.994	1.01	1.011	2.96E-01
P10909	Clusterin	CLU	17.4	52.494	48.789	31	5	5	3	7	4	5	6	6	5	5	5	5	5	5	5	5	5	5	5	5	283480000	394520000	316460000	386500000	335080000	378550000	0.812	1.13	0.907	1.107	0.96	1.084	1.24	9.00E-03
P11021	78 kDa glucose-regulated protein	HSPA5	57	72.332	281.77	592	37	36	95	102	99	105	99	92	32	37	34	34	36	32	31	36	33	33	35	31	59074000000	53939000000	62254000000	54439000000	62842000000	55100000000	1.02	0.931	1.074	0.94	1.085	0.951	0.888	4.80E-03
P11047	Laminin subunit gamma-1	LAMC1	33.9	177.6	293.15	184	37	37	33	28	30	29	35	29	33	31	31	30	34	33	33	31	31	30	34	33	1457100000	1412700000	1609100000	1422000000	1436900000	1340300000	1.007	0.977	1.113	0.983	0.993	0.927	0.927	1.43E-01
P11117	Lysosomal acid phosphatase	ACP2	15.6	48.344	16.317	26	6	6	4	4	4	5	5	4	5	6	6	5	6	5	5	6	6	5	6	5	191560000	195850000	157920000	169580000	156150000	174750000	1.099	1.124	0.906	0.973	0.896	1.003	1.068	4.58E-01
P11142	Heat shock cognate 71 kDa protein	HSPA8	73.4	70.897	323.31	763	41	29	108	151	119	138	111	136	38	37	38	36	36	33	27	25	26	24	24	23	71295000000	77164000000	69330000000	79686000000	67455000000	80139000000	0.961	1.04	0.935	1.074	0.909	1.08	1.139	2.62E-03
P11166	Solute carrier family 2, facilitated glucose transporter member 1	SLC2A1	14	54.083	111.6	56	8	8	9	13	10	8	8	8	7	8	7	8	7	8	7	8	7	8	7	8	2820800000	2573900000	2726400000	2703200000	3075300000	2340800000	1.042	0.951	1.007	0.999	1.136	0.865	0.883	8.74E-02
P11169	Solute carrier family 2, facilitated glucose transporter member 3	SLC2A3	7.3	53.924	24.12	17	3	3	3	3	3	3	3	2	3	3	3	3	3	3	3	3	3	3	3	3	117110000	79668000	122710000	97150000	103960000	78215000	1.173	0.798	1.23	0.973	1.042	0.784	0.742	2.30E-02
P11171	Protein 4.1	EPB41	19.4	97.016	47.81	30	13	11	6	4	6	5	5	4	12	9	10	10	11	9	10	7	8	8	9	7	149920000	136090000	138820000	162380000	127960000	150610000	1.039	0.943	0.962	1.125	0.887	1.044	1.078	3.37E-01
P11172	Uridine 5'-monophosphate synthase	UMPS	32.9	52.221	31.692	55	15	15	10	8	8	7	11	11	13	14	13	14	14	15	13	14	13	14	14	15	546560000	651750000	582610000	557380000	629610000	616970000	0.915	1.091	0.975	0.933	1.054	1.033	1.038	5.73E-01
P11177	Pyruvate dehydrogenase E1 component subunit beta, mitochondrial	PDHB	70.5	39.233	117.41	139	17	17	20	28	23	23	21	24	15	15	17	15	16	15	15	15	17	15	16	15	3469100000	3216800000	3400500000	3276600000	3558300000	3432100000	1.023	0.948	1.002	0.966	1.049	1.012	0.952	1.01E-01
P11182	Lipoamide acyltransferase component of branched-chain alpha-keto acid dehydrogenase complex, mitochondrial	DBT	54.1	53.486	100.65	122	21	21	18	21	20	23	16	24	17	19	20	19	20	21	17	19	20	19	20	21	1718100000	1677200000	1858900000	1677600000	1782700000	1732800000	0.987	0.963	1.068	0.963	1.024	0.995	0.949	1.12E-01
P11216	Glycogen phosphorylase, brain form	PYGB	21.5	96.695	26.55	26	16	10	5	4	4	4	4	5	13	12	14	16	13	14	8	7	9	10	8	9	204070000	240940000	201340000	222010000	179280000	288450000	0.916	1.082	0.904	0.997	0.805	1.295	1.285	5.92E-02
P11233	Ras-related protein Ral-A	RALA	40.8	23.567	38.752	39	8	5	6	7	6	6	6	8	8	7	8	8	8	8	5	4	5	5	5	5	2502700000	2104200000	2800800000	1994200000	2579200000	2194400000	1.059	0.891	1.185	0.844	1.092	0.929	0.798	7.62E-03
P11234	Ras-related protein Ral-B	RALB	42.2	23.408	34.351	95	10	7	14	16	17	17	18	13	10	10	10	10	10	10	7	7	7	7	7	7	2205600000	1951600000	2134900000	1927600000	1932000000	2199700000	1.071	0.948	1.037	0.936	0.939	1.069	0.969	6.18E-01
P11274	Breakpoint cluster region protein	BCR	4.3	142.82	6.0322	5	4	4	2	1	0	0	2	0	3	3	2	4	4	4	3	3	2	4	4	4	61815000	67868000	0	40676000	44778000	37754000	1.222	1.342		0.804	0.885	0.746	0.915	7.66E-01
P11279	Lysosome-associated membrane glycoprotein 1	LAMP1	12.2	44.882	17.948	35	5	5	6	5	5	6	6	7	5	5	5	5	5	5	5	5	5	5	5	5	1643900000	1652900000	1452000000	1472500000	1624700000	1636300000	1.04	1.046	0.919	0.932	1.028	1.035	1.009	8.78E-01
P11310	Medium-chain specific acyl-CoA dehydrogenase, mitochondrial	ACADM	41.8	46.588	80.51	71	13	13	14	11	13	12	10	11	11	12	12	11	12	11	11	12	12	11	12	11	1100400000	977540000	1018400000	1029200000	1112100000	1030000000	1.053	0.936	0.975	0.985	1.065	0.986	0.94	1.31E-01
P11387	DNA topoisomerase 1	TOP1	43.7	90.725	153.16	218	31	31	38	37	35	30	41	37	31	30	31	29	31	30	31	30	31	29	31	30	4000700000	3572700000	4085700000	3437000000	4134800000	3741700000	1.045	0.933	1.067	0.898	1.08	0.977	0.88	7.08E-03
P11388	DNA topoisomerase 2-alpha	TOP2A	21.2	174.38	72.85	108	28	18	23	17	16	16	22	14	25	24	23	26	25	21	16	17	16	17	17	15	853070000	670770000	847280000	674990000	815740000	744000000	1.111	0.874	1.104	0.879	1.063	0.969	0.831	5.78E-03
P11413	Glucose-6-phosphate 1-dehydrogenase	G6PD	52.6	59.256	115	128	23	23	19	23	18	22	23	23	20	21	19	18	20	21	20	21	19	18	20	21	1364700000	1693900000	1608000000	1733200000	1674700000	1802400000	0.829	1.029	0.977	1.053	1.017	1.095	1.125	1.23E-01
P11441	Ubiquitin-like protein 4A	UBL4A	50.3	17.776	13.345	27	7	7	3	5	3	7	4	5	6	7	7	7	7	7	6	7	7	7	7	7	291710000	313570000	262690000	295840000	244520000	317480000	1.014	1.09	0.913	1.029	0.85	1.104	1.16	4.91E-02
P11498	Pyruvate carboxylase, mitochondrial	PC	28.5	129.63	93.871	92	23	23	14	17	18	15	13	15	18	18	19	18	19	20	18	18	19	18	19	20	816610000	684170000	852720000	734900000	831170000	837100000	1.03	0.863	1.076	0.927	1.048	1.056	0.902	1.53E-01
P11532	Dystrophin	DMD	1.2	426.74	2.4774	2	5	2	0	1	0	0	1	0	4	4	3	4	5	4	2	2	2	2	2	2	0	19603000	0	0	26316000	0		0.854			1.146		0.745
P11586	C-1-tetrahydrofolate synthase, cytoplasmic	MTHFD1	56.8	101.56	225.31	265	44	43	41	49	39	45	43	48	40	44	42	42	41	44	40	43	41	41	40	43	4381400000	4443600000	4493200000	4712500000	4453300000	4671400000	0.968	0.982	0.993	1.041	0.984	1.032	1.037	1.37E-01
P11717	Cation-independent mannose-6-phosphate receptor	IGF2R	24	274.37	177.29	139	41	41	23	21	25	27	26	17	33	33	33	35	34	29	33	33	33	35	34	29	1000500000	791060000	931630000	799990000	934480000	808020000	1.14	0.901	1.062	0.912	1.065	0.921	0.837	2.48E-03
P11766	Alcohol dehydrogenase class-3	ADH5	45.2	39.724	46.304	57	10	10	9	9	8	9	11	11	9	8	8	9	10	10	9	8	8	9	10	10	593630000	673480000	603560000	702550000	591690000	674740000	0.928	1.052	0.943	1.098	0.925	1.054	1.146	1.02E-03
P11908	Ribose-phosphate pyrophosphokinase 2	PRPS2	56	34.769	44.23	68	14	5	14	10	12	10	11	11	14	13	13	14	12	14	5	5	5	5	5	5	879070000	780490000	848550000	816320000	800230000	878770000	1.054	0.936	1.018	0.979	0.96	1.054	0.979	6.60E-01
P11940	Polyadenylate-binding protein 1	PABPC1	55.7	70.67	214.58	321	31	21	48	56	50	55	54	58	30	30	30	28	31	30	20	20	21	19	21	20	9172500000	9304600000	8884100000	9670500000	8802100000	9836800000	0.989	1.003	0.958	1.042	0.949	1.06	1.073	2.80E-02
P12004	Proliferating cell nuclear antigen	PCNA	85.4	28.768	128.64	98	15	15	15	16	17	16	15	19	12	15	15	14	14	13	12	15	15	14	14	13	5001900000	5883900000	5137000000	6126300000	5204600000	5636300000	0.91	1.07	0.934	1.114	0.947	1.025	1.15	7.48E-03
P12081	Histidine--tRNA ligase, cytoplasmic	HARS	56.4	57.41	92.935	145	25	18	26	23	23	26	26	21	24	24	24	24	23	22	17	17	17	17	16	15	1853300000	1935300000	1902100000	1950600000	1945700000	1976600000	0.962	1.004	0.987	1.012	1.01	1.026	1.028	1.40E-01
P12236	ADP/ATP translocase 3	SLC25A6	50	32.866	22.97	114	16	4	20	20	19	18	17	20	16	16	16	16	16	16	4	4	4	4	4	4	2504800000	2055800000	2644500000	2138100000	2326200000	2101800000	1.091	0.896	1.152	0.932	1.014	0.916	0.842	1.45E-02
P12268	Inosine-5'-monophosphate dehydrogenase 2	IMPDH2	64.2	55.804	306.76	286	27	26	43	53	41	52	48	49	26	26	26	27	26	26	25	25	25	26	25	25	6803800000	7823400000	6823100000	7045600000	7128200000	8081600000	0.934	1.074	0.937	0.967	0.979	1.109	1.106	8.99E-02
P12270	Nucleoprotein TPR	TPR	48.5	267.29	323.31	718	100	100	117	111	121	118	123	128	90	93	92	86	97	91	90	93	92	86	97	91	18912000000	14785000000	18575000000	15227000000	18915000000	15381000000	1.115	0.871	1.095	0.898	1.115	0.907	0.805	6.22E-05
P12429	Annexin A3	ANXA3	73.7	36.375	115.99	173	23	23	30	31	30	28	26	28	21	20	19	20	19	21	21	20	19	20	19	21	5427700000	5518500000	5383600000	5434600000	5481500000	5367800000	0.999	1.015	0.99	1	1.008	0.988	1.002	8.66E-01
P12532	Creatine kinase U-type, mitochondrial	CKMT1A	46	47.036	99.584	62	12	12	10	10	12	10	11	9	11	10	12	11	10	10	11	10	12	11	10	10	803700000	795530000	743280000	659080000	749190000	688740000	1.086	1.075	1.005	0.891	1.013	0.931	0.933	3.27E-01
P12694	2-oxoisovalerate dehydrogenase subunit alpha, mitochondrial	BCKDHA	26.5	50.47	45.337	54	9	9	9	8	9	9	11	8	9	9	9	9	9	8	9	9	9	9	9	8	658910000	460910000	513910000	490940000	622720000	501900000	1.217	0.851	0.949	0.907	1.15	0.927	0.81	6.56E-02
P12755	Ski oncogene	SKI	5.5	80.004	13.107	11	2	2	2	2	2	2	1	2	2	2	2	2	2	2	2	2	2	2	2	2	47153000	30853000	36074000	38342000	46844000	36001000	1.203	0.787	0.92	0.978	1.195	0.918	0.809	1.24E-01
P12814	Alpha-actinin-1	ACTN1	75.2	103.06	323.31	574	58	35	85	106	90	97	91	105	55	55	54	55	56	55	32	33	32	32	33	33	19774000000	26790000000	19673000000	26825000000	19096000000	27100000000	0.852	1.154	0.848	1.156	0.823	1.168	1.379	2.94E-06
P12830	Cadherin-1	CDH1	31.2	97.455	154.5	195	20	18	32	30	30	35	32	36	18	18	18	19	18	19	16	17	16	17	17	18	5020400000	4985500000	4945400000	4269500000	5164700000	4891100000	1.029	1.022	1.014	0.875	1.058	1.002	0.935	2.33E-01
P12931	Proto-oncogene tyrosine-protein kinase Src	SRC	32.5	59.834	28.615	50	14	9	6	6	13	9	8	8	12	14	14	14	13	14	7	9	9	9	8	9	371310000	315220000	438000000	327520000	404270000	313950000	1.027	0.871	1.211	0.905	1.118	0.868	0.788	1.23E-02
P12955	Xaa-Pro dipeptidase	PEPD	16.6	54.548	14.807	15	6	6	1	3	2	3	3	3	4	6	5	5	6	6	4	6	5	5	6	6	81290000	84545000	75197000	78045000	94018000	92114000	0.965	1.004	0.893	0.927	1.117	1.094	1.017	8.49E-01
P12956	X-ray repair cross-complementing protein 6	XRCC6	56.5	69.842	179.09	310	31	31	49	52	51	54	54	50	30	30	30	29	30	31	30	30	30	29	30	31	10393000000	9141600000	10406000000	8654400000	10383000000	8654200000	1.082	0.952	1.083	0.901	1.081	0.901	0.848	1.05E-02
P13010	X-ray repair cross-complementing protein 5	XRCC5	56.6	82.704	298.92	299	32	32	48	50	53	50	50	48	29	27	29	30	29	28	29	27	29	30	29	28	8484700000	7503300000	8122300000	7630500000	8606200000	7318300000	1.068	0.944	1.022	0.961	1.083	0.921	0.89	5.80E-03
P13051	Uracil-DNA glycosylase	UNG	14.7	34.645	18.021	20	2	2	3	5	3	3	3	3	2	2	2	2	2	2	2	2	2	2	2	2	94052000	113710000	92464000	99492000	92844000	104750000	0.945	1.142	0.929	0.999	0.933	1.052	1.138	9.13E-02
P13073	Cytochrome c oxidase subunit 4 isoform 1, mitochondrial	COX4I1	43.2	19.576	23.168	88	8	8	13	16	15	14	17	13	8	8	8	8	8	7	8	8	8	8	8	7	5276500000	4560900000	5846400000	4675900000	5265500000	5173000000	1.028	0.889	1.139	0.911	1.026	1.008	0.879	6.99E-02
P13196	5-aminolevulinate synthase, nonspecific, mitochondrial	ALAS1	10.6	70.58	18.341	15	4	4	4	1	4	2	4	0	3	3	4	2	3	2	3	3	4	2	3	2	61372000	44186000	87251000	58600000	85455000	38224000	0.982	0.707	1.396	0.937	1.367	0.611	0.602	3.95E-02
P13284	Gamma-interferon-inducible lysosomal thiol reductase	IFI30	22.4	27.963	36.307	19	3	3	4	3	3	2	3	4	3	3	3	3	3	3	3	3	3	3	3	3	123320000	119510000	146090000	95820000	104540000	104040000	1.067	1.034	1.264	0.829	0.905	0.9	0.854	2.60E-01
P13473	Lysosome-associated membrane glycoprotein 2	LAMP2	13.7	44.96	22.251	31	5	5	5	6	4	6	5	5	4	4	4	5	4	4	4	4	4	5	4	4	826010000	836840000	824490000	905700000	751560000	841520000	0.994	1.007	0.992	1.09	0.904	1.013	1.076	1.41E-01
P13489	Ribonuclease inhibitor	RNH1	76.6	49.973	234.75	156	24	24	26	27	22	27	25	29	24	23	22	23	23	24	24	23	22	23	23	24	2298700000	2718600000	2387200000	2731900000	2381200000	2693500000	0.907	1.072	0.942	1.078	0.939	1.062	1.152	3.03E-04
P13639	Elongation factor 2	EEF2	71.4	95.337	323.31	808	53	52	131	136	127	144	126	144	52	52	52	53	53	53	51	51	51	52	52	52	32496000000	35771000000	33368000000	37810000000	33198000000	37296000000	0.929	1.022	0.954	1.081	0.949	1.066	1.119	4.14E-03
P13667	Protein disulfide-isomerase A4	PDIA4	58.1	72.932	306.35	420	39	39	69	67	69	69	74	72	39	37	37	36	38	36	39	37	37	36	38	36	15358000000	14529000000	15664000000	13988000000	16018000000	14344000000	1.025	0.97	1.045	0.934	1.069	0.957	0.911	4.94E-03
P13674	Prolyl 4-hydroxylase subunit alpha-1	P4HA1	39	61.049	85.48	100	16	16	17	16	19	18	17	13	15	14	16	12	15	13	15	14	16	12	15	13	1062600000	1107300000	1105100000	1018900000	1098400000	953610000	1.005	1.047	1.045	0.963	1.039	0.902	0.943	2.52E-01
P13693	Translationally-controlled tumor protein	TPT1	45.9	19.595	28.795	85	7	7	11	15	16	14	14	15	7	7	7	6	7	7	7	7	7	6	7	7	3043700000	3102000000	3225500000	2921500000	2833400000	2616700000	1.029	1.049	1.091	0.988	0.958	0.885	0.949	4.43E-01
P13726	Tissue factor	F3	36.6	33.067	127.9	163	13	13	29	26	26	26	28	28	13	13	13	13	13	13	13	13	13	13	13	13	6346400000	5089300000	6046200000	4946800000	5974000000	4922200000	1.143	0.916	1.089	0.891	1.076	0.886	0.814	8.21E-04
P13747	HLA class I histocompatibility antigen, alpha chain E	HLA-E	36.3	40.156	18.967	16	10	7	1	3	2	4	2	4	4	6	6	8	6	10	2	4	4	5	4	7	0	125930000	96930000	118760000	75964000	90991000		1.238	0.953	1.168	0.747	0.895	1.294	2.06E-01
P13796	Plastin-2	LCP1	72.9	70.288	245.66	213	34	27	33	34	32	37	37	40	32	30	33	31	33	31	25	23	26	24	26	24	4064400000	3881200000	4036300000	4242400000	4059900000	4038600000	1.003	0.957	0.996	1.047	1.002	0.996	1	9.96E-01
P13797	Plastin-3	PLS3	60.8	70.81	260.82	316	36	27	48	50	58	51	57	52	36	34	35	36	35	35	27	25	26	27	26	26	6542300000	6017800000	6851300000	6013300000	7009000000	5958500000	1.022	0.94	1.071	0.94	1.095	0.931	0.882	2.83E-02
P13798	Acylamino-acid-releasing enzyme	APEH	27.7	81.224	73.024	85	15	15	15	16	11	12	15	16	15	15	14	14	15	15	15	15	14	14	15	15	898330000	891570000	947480000	938260000	928960000	915130000	0.976	0.969	1.03	1.02	1.01	0.995	0.989	6.40E-01
P13804	Electron transfer flavoprotein subunit alpha, mitochondrial	ETFA	63.4	35.079	112.85	195	17	17	35	32	30	32	31	35	16	17	17	17	17	17	16	17	17	17	17	17	6115800000	6222500000	6415500000	5971300000	6328100000	6432100000	0.979	0.996	1.027	0.956	1.013	1.03	0.988	6.52E-01
P13807	Glycogen [starch] synthase, muscle	GYS1	6.6	83.785	8.3221	5	3	3	0	0	2	1	1	1	1	2	3	2	2	2	1	2	3	2	2	2	0	0	78444000	70996000	58143000	77083000			1.102	0.998	0.817	1.083	1.084	6.42E-01
P13861	cAMP-dependent protein kinase type II-alpha regulatory subunit	PRKAR2A	48.3	45.518	122.59	96	14	14	14	17	19	17	15	14	13	12	13	12	13	13	13	12	13	12	13	13	948600000	927630000	932790000	955530000	927560000	843550000	1.028	1.005	1.011	1.036	1.005	0.914	0.971	4.68E-01
P13928	Annexin A8	ANXA8	60.2	36.881	22.424	15	15	2	2	3	2	3	2	3	14	15	15	15	14	15	2	2	2	2	2	2	36082000	304820000	59770000	309260000	62451000	266580000	0.208	1.76	0.345	1.786	0.361	1.539	5.563	1.16E-04
P13984	General transcription factor IIF subunit 2	GTF2F2	61.4	28.38	39.406	64	13	13	10	12	8	13	9	12	12	13	11	11	10	10	12	13	11	11	10	10	511500000	485350000	418240000	484080000	467510000	585390000	1.04	0.986	0.85	0.984	0.95	1.19	1.113	2.89E-01
P13987	CD59 glycoprotein	CD59	25	14.177	12.286	39	4	4	6	5	7	7	7	7	4	4	4	4	4	4	4	4	4	4	4	4	3897100000	3116600000	3575000000	2970600000	3823300000	3047900000	1.144	0.915	1.05	0.872	1.123	0.895	0.809	2.46E-03
P13995	Bifunctional methylenetetrahydrofolate dehydrogenase/cyclohydrolase, mitochondrial	MTHFD2	64.9	37.895	175.37	110	16	16	21	21	17	17	18	16	15	15	14	15	14	14	15	15	14	15	14	14	2719600000	2399400000	2667800000	2468300000	2666500000	2566500000	1.054	0.93	1.033	0.956	1.033	0.994	0.923	1.60E-02
P14174	Macrophage migration inhibitory factor	MIF	35.7	12.476	5.9175	20	3	3	3	4	2	4	3	4	3	3	3	2	3	3	3	3	3	2	3	3	1152200000	1642100000	1097700000	1459800000	1204600000	1553600000	0.852	1.215	0.812	1.08	0.891	1.149	1.348	2.80E-03
P14209	CD99 antigen	CD99	45.4	18.848	67.384	24	4	4	6	4	6	4	2	2	4	4	4	4	4	4	4	4	4	4	4	4	317860000	241650000	344450000	258660000	313890000	245080000	1.108	0.842	1.2	0.901	1.094	0.854	0.764	2.14E-03
P14314	Glucosidase 2 subunit beta	PRKCSH	51.5	59.425	198.4	239	21	21	42	38	39	40	42	38	19	20	20	20	21	19	19	20	20	20	21	19	16464000000	15351000000	18054000000	15314000000	17323000000	15638000000	1.007	0.938	1.104	0.936	1.059	0.956	0.893	1.72E-02
P14324	Farnesyl pyrophosphate synthase	FDPS	22.2	48.275	33.885	47	8	8	6	9	9	10	6	7	7	7	7	7	6	8	7	7	7	7	6	8	727250000	671090000	607270000	661480000	659970000	752280000	1.07	0.987	0.893	0.973	0.971	1.106	1.045	5.41E-01
P14373	Zinc finger protein RFP	TRIM27	13.3	58.489	7.5724	8	6	6	0	2	1	4	1	0	3	5	5	5	3	3	3	5	5	5	3	3	0	134340000	96171000	113060000	81037000	110000000		1.256	0.899	1.057	0.758	1.029	1.345	7.48E-02
P14406	Cytochrome c oxidase subunit 7A2, mitochondrial	COX7A2	15.7	9.3959	3.0514	20	1	1	3	3	3	3	5	3	1	1	1	1	1	1	1	1	1	1	1	1	1244700000	1516100000	1043200000	1800000000	1277700000	1220600000	0.922	1.123	0.773	1.333	0.946	0.904	1.272	1.51E-01
P14550	Alcohol dehydrogenase [NADP(+)]	AKR1A1	50.2	36.573	81.812	57	12	12	7	9	9	8	12	12	9	11	10	10	12	11	9	11	10	10	12	11	458870000	478990000	493650000	495170000	464600000	551790000	0.935	0.977	1.006	1.009	0.947	1.125	1.077	2.14E-01
P14618	Pyruvate kinase PKM	PKM	79.8	57.936	323.31	654	40	40	90	127	98	120	102	117	39	37	39	38	38	40	39	37	39	38	38	40	40966000000	46828000000	40270000000	46077000000	41544000000	47629000000	0.933	1.067	0.918	1.05	0.947	1.085	1.145	5.20E-04
P14625	Endoplasmin	HSP90B1	60.1	92.468	323.31	576	46	45	90	103	83	108	91	101	43	42	44	42	44	42	42	41	43	41	43	41	50623000000	45106000000	49483000000	44584000000	48602000000	44507000000	1.074	0.957	1.049	0.946	1.031	0.944	0.902	1.40E-03
P14635	G2/mitotic-specific cyclin-B1	CCNB1	38.1	48.337	31.338	55	11	11	9	8	8	9	10	11	9	7	9	9	8	8	9	7	9	9	8	8	265310000	276710000	226290000	247310000	279730000	248460000	1.031	1.075	0.879	0.961	1.087	0.966	1.001	9.85E-01
P14649	Myosin light chain 6B	MYL6B	25	22.764	5.057	11	5	3	2	2	1	1	2	3	4	5	4	4	4	4	2	3	2	2	2	2	30956000	35192000	30723000	37650000	38292000	43024000	0.861	0.978	0.854	1.047	1.064	1.196	1.159	1.94E-01
P14735	Insulin-degrading enzyme	IDE	16.2	117.97	31.424	58	15	15	8	9	10	11	11	9	14	12	13	15	14	13	14	12	13	15	14	13	379990000	359110000	383330000	403920000	379890000	427000000	0.977	0.923	0.986	1.039	0.977	1.098	1.041	5.16E-01
P14854	Cytochrome c oxidase subunit 6B1	COX6B1	74.4	10.192	27.303	69	6	6	13	12	10	13	10	11	6	6	6	6	6	6	6	6	6	6	6	6	2628000000	2015700000	2515300000	2262200000	2592900000	2121400000	1.115	0.856	1.068	0.96	1.101	0.9	0.827	4.82E-03
P14859	POU domain, class 2, transcription factor 1	POU2F1	9.3	76.471	35.01	21	6	6	3	4	2	5	2	5	6	6	6	5	6	6	6	6	6	5	6	6	77068000	124530000	83246000	124660000	90227000	121910000	0.744	1.202	0.803	1.203	0.871	1.177	1.481	5.01E-04
P14866	Heterogeneous nuclear ribonucleoprotein L	HNRNPL	63.2	64.132	323.31	407	24	23	67	67	67	63	67	76	24	24	24	23	24	24	23	23	23	22	23	23	21654000000	19843000000	23037000000	20748000000	22751000000	21385000000	1.004	0.92	1.068	0.962	1.055	0.991	0.919	4.14E-02
P14868	Aspartate--tRNA ligase, cytoplasmic	DARS	66.7	57.136	127.04	222	31	31	39	35	37	38	36	37	31	29	31	31	31	31	31	29	31	31	31	31	4294000000	4328400000	4276000000	4404300000	4351200000	4306500000	0.992	1	0.988	1.018	1.006	0.995	1.009	3.51E-01
P14923	Junction plakoglobin	JUP	74.1	81.744	323.31	407	40	36	63	72	61	72	64	75	39	39	40	39	40	40	35	35	36	35	36	36	10087000000	12031000000	9946900000	11749000000	10516000000	10873000000	0.928	1.107	0.915	1.081	0.968	1.001	1.134	2.44E-02
P14927	Cytochrome b-c1 complex subunit 7	UQCRB	49.5	13.53	35.545	69	6	6	11	11	14	11	11	11	6	6	6	6	6	6	6	6	6	6	6	6	2061800000	1664400000	1879000000	1662100000	2039100000	1707700000	1.123	0.907	1.024	0.905	1.111	0.93	0.842	6.06E-03
P15121	Aldose reductase	AKR1B1	41.8	35.853	48.827	64	11	11	9	12	10	11	11	11	9	10	10	9	11	11	9	10	10	9	11	11	1810700000	1925300000	1690000000	1966500000	1700300000	1964300000	0.983	1.045	0.917	1.067	0.923	1.066	1.126	5.92E-03
P15151	Poliovirus receptor	PVR	17	45.302	80.169	40	6	6	6	8	7	6	8	5	5	6	5	4	5	6	5	6	5	4	5	6	560790000	349600000	432960000	433320000	455720000	417430000	1.27	0.792	0.98	0.981	1.032	0.945	0.828	1.52E-01
P15153	Ras-related C3 botulinum toxin substrate 2	RAC2	49.5	21.429	10.538	24	8	3	4	4	4	4	4	4	8	8	8	8	8	8	3	3	3	3	3	3	848950000	528560000	829850000	437830000	760690000	466500000	1.315	0.819	1.286	0.678	1.179	0.723	0.587	8.99E-04
P15170	Eukaryotic peptide chain release factor GTP-binding subunit ERF3A	GSPT1	39.1	55.755	99.331	77	16	8	12	14	10	12	14	15	14	16	15	15	15	16	8	8	8	8	8	8	1384700000	1354100000	1470500000	1436200000	1385100000	1290700000	0.998	0.976	1.06	1.036	0.999	0.931	0.962	3.56E-01
P15260	Interferon gamma receptor 1	IFNGR1	14.1	54.404	2.3543	6	3	3	0	2	0	2	2	0	2	3	2	2	3	1	2	3	2	2	3	1	59376000	57585000	0	58037000	50897000	0	1.051	1.02		1.028	0.901		1.049	5.93E-01
P15311	Ezrin	EZR	53.9	69.412	156.92	187	32	19	25	36	29	36	26	35	31	32	30	32	31	31	18	19	17	19	18	18	5138500000	6758600000	4985900000	7482000000	5103000000	7653800000	0.831	1.092	0.806	1.209	0.825	1.237	1.438	1.34E-03
P15374	Ubiquitin carboxyl-terminal hydrolase isozyme L3	UCHL3	49.1	26.182	78.855	55	7	7	9	10	11	7	9	9	7	6	7	7	7	7	7	6	7	7	7	7	601400000	721700000	697650000	654670000	652000000	755480000	0.884	1.061	1.025	0.962	0.958	1.11	1.093	2.12E-01
P15407	Fos-related antigen 1	FOSL1	29.5	29.413	16.966	26	6	6	5	3	4	4	7	3	5	4	4	4	5	4	5	4	4	4	5	4	192550000	115150000	220190000	190670000	207730000	155740000	1.068	0.639	1.221	1.057	1.152	0.864	0.744	8.48E-02
P15529	Membrane cofactor protein	CD46	15.1	43.747	13.472	32	7	7	6	6	5	5	5	5	6	6	7	6	6	5	6	6	7	6	6	5	306130000	336440000	365230000	322500000	334310000	283120000	0.943	1.036	1.125	0.993	1.03	0.872	0.937	4.16E-01
P15531	Nucleoside diphosphate kinase A	NME1	69.7	17.149	37.323	56	10	5	8	13	9	10	8	8	10	9	9	9	9	9	5	5	5	5	5	5	2188700000	2112000000	2215000000	2087300000	2124600000	2132400000	1.021	0.985	1.033	0.974	0.991	0.995	0.97	9.31E-02
P15559	NAD(P)H dehydrogenase [quinone] 1	NQO1	34.3	30.867	27.849	57	9	9	9	8	8	10	10	12	7	7	7	8	8	8	7	7	7	8	8	8	725750000	841960000	710720000	823950000	731350000	779990000	0.944	1.095	0.924	1.072	0.951	1.014	1.128	8.80E-03
P15586	N-acetylglucosamine-6-sulfatase	GNS	26.1	62.081	52.847	70	13	13	12	12	11	11	12	12	12	12	13	12	12	11	12	12	13	12	12	11	1011100000	841670000	1042600000	885020000	1003500000	868230000	1.073	0.893	1.107	0.939	1.065	0.922	0.849	8.98E-04
P15880	40S ribosomal protein S2	RPS2	54.3	31.324	58.458	204	15	15	33	36	29	35	32	39	15	15	15	15	15	15	15	15	15	15	15	15	9666000000	12208000000	9488100000	12625000000	10472000000	12989000000	0.86	1.086	0.844	1.123	0.932	1.155	1.277	1.94E-03
P15924	Desmoplakin	DSP	53.2	331.77	323.31	869	137	137	128	167	121	167	128	158	130	131	129	131	129	134	130	131	129	131	129	134	10067000000	14600000000	10277000000	14330000000	10247000000	14442000000	0.817	1.184	0.834	1.162	0.831	1.172	1.418	9.88E-07
P15927	Replication protein A 32 kDa subunit	RPA2	37.4	29.247	38.836	50	6	6	7	8	11	9	10	5	5	5	6	6	6	5	5	5	6	6	6	5	722040000	562200000	732570000	520860000	627790000	559670000	1.163	0.906	1.18	0.839	1.011	0.901	0.789	1.51E-02
P15954	Cytochrome c oxidase subunit 7C, mitochondrial	COX7C	28.6	7.2454	6.2678	9	2	2	1	2	3	0	2	1	2	2	2	2	2	2	2	2	2	2	2	2	362740000	321000000	444650000	256450000	849940000	152490000	0.912	0.807	1.118	0.645	2.136	0.383	0.44	1.23E-01
P16070	CD44 antigen	CD44	24.9	81.537	67.636	139	13	13	21	22	22	25	24	25	12	12	11	12	11	13	12	12	11	12	11	13	12174000000	11420000000	12573000000	10287000000	12249000000	11631000000	1.039	0.974	1.073	0.878	1.045	0.992	0.901	4.86E-02
P16104	Histone H2AX	H2AFX	39.9	15.144	9.1951	52	6	3	9	8	9	9	9	8	6	6	5	5	5	5	3	3	3	3	3	3	10074000000	8342900000	11087000000	7998200000	9599700000	7873400000	1.099	0.911	1.21	0.873	1.048	0.859	0.787	9.06E-03
P16144	Integrin beta-4	ITGB4	53	202.16	323.31	587	75	75	89	105	97	99	93	104	71	70	72	72	69	67	71	70	72	72	69	67	14893000000	15207000000	14823000000	14937000000	15377000000	15723000000	0.982	1.003	0.978	0.985	1.014	1.037	1.017	4.22E-01
P16152	Carbonyl reductase [NADPH] 1	CBR1	59.2	30.375	118.2	84	12	10	13	15	14	14	13	15	11	11	10	10	10	10	9	9	8	8	8	8	1412800000	1694900000	1597500000	1775600000	1426700000	1702500000	0.882	1.058	0.997	1.109	0.891	1.063	1.166	1.93E-02
P16220	Cyclic AMP-responsive element-binding protein 1	CREB1	12.9	36.688	9.7381	15	3	3	3	3	2	3	1	3	3	3	3	3	2	3	3	3	3	3	2	3	242430000	293980000	271660000	249970000	291090000	297730000	0.883	1.071	0.99	0.911	1.061	1.085	1.045	5.91E-01
P16278	Beta-galactosidase	GLB1	17.7	76.074	28.945	55	9	9	7	10	10	10	9	9	8	9	8	9	8	8	8	9	8	9	8	8	357740000	367470000	343230000	334510000	381510000	367520000	0.997	1.025	0.957	0.933	1.064	1.025	0.988	7.96E-01
P16333	Cytoplasmic protein NCK1	NCK1	18.8	42.864	11.328	17	6	6	2	3	2	5	2	3	3	4	4	5	4	4	3	4	4	5	4	4	80907000	65427000	67100000	77238000	55925000	93499000	1.103	0.892	0.915	1.053	0.762	1.275	1.158	3.79E-01
P16383	GC-rich sequence DNA-binding factor 2	GCFC2	5.4	89.384	7.2743	8	3	3	2	1	2	2	1	0	1	1	2	2	2	1	1	1	2	2	2	1	0	0	0	39237000	33984000	0				1.072	0.928		1.155
P16401	Histone H1.5	HIST1H1B	28.8	22.58	9.9776	21	7	4	3	3	3	3	5	4	6	6	6	6	7	6	3	3	3	3	4	3	423190000	576010000	470690000	531180000	461790000	557270000	0.841	1.144	0.935	1.055	0.917	1.107	1.228	6.22E-03
P16403	Histone H1.2	HIST1H1C	44.1	21.364	36.165	139	12	4	21	25	20	26	19	28	12	12	12	11	11	11	4	4	4	3	3	3	26959000000	28725000000	28334000000	29190000000	30958000000	29653000000	0.931	0.992	0.978	1.008	1.069	1.024	1.015	7.34E-01
P16422	Epithelial cell adhesion molecule	EPCAM	43	34.932	146.33	103	12	12	15	18	16	20	15	19	11	10	10	11	11	10	11	10	10	11	11	10	5753600000	5660900000	5118000000	5640300000	5658700000	5038700000	1.05	1.033	0.934	1.03	1.033	0.92	0.988	8.34E-01
P16435	NADPH--cytochrome P450 reductase	POR	54.4	76.689	210.14	225	32	32	39	39	30	39	41	37	28	29	29	29	29	27	28	29	29	29	29	27	4457100000	3936100000	4467300000	4146400000	4464300000	4034200000	1.049	0.926	1.051	0.975	1.05	0.949	0.905	2.00E-02
P16615	Sarcoplasmic/endoplasmic reticulum calcium ATPase 2	ATP2A2	50.3	114.76	323.31	486	46	46	80	84	81	81	79	81	46	46	46	45	45	46	46	46	46	45	45	46	12438000000	11259000000	12825000000	11706000000	12491000000	11793000000	1.029	0.932	1.061	0.969	1.034	0.976	0.921	8.22E-03
P16930	Fumarylacetoacetase	FAH	8.1	46.374	5.8281	11	3	3	1	3	2	2	1	2	3	3	3	3	3	3	3	3	3	3	3	3	54776000	69954000	68142000	59475000	55966000	64774000	0.881	1.125	1.096	0.956	0.9	1.042	1.086	3.84E-01
P16949	Stathmin	STMN1	44.3	17.302	13.351	37	7	5	5	6	8	8	5	5	6	6	7	6	6	6	4	4	5	4	4	4	899560000	945090000	811930000	893390000	807320000	968110000	1.014	1.065	0.915	1.007	0.91	1.091	1.114	6.17E-02
P16989	Y-box-binding protein 3	YBX3	62.9	40.089	226.47	196	19	15	30	39	28	36	29	34	19	19	19	19	18	18	15	15	15	15	14	14	6733000000	7821100000	6235100000	7403100000	6752700000	8080600000	0.939	1.091	0.869	1.032	0.942	1.127	1.182	1.01E-02
P17010	Zinc finger X-chromosomal protein	ZFX	8	90.521	32.03	9	6	6	2	0	2	2	2	1	5	3	3	4	5	3	5	3	3	4	5	3	41724000	30533000	37673000	21468000	27429000	19159000	1.407	1.029	1.27	0.724	0.925	0.646	0.666	9.63E-02
P17028	Zinc finger protein 24	ZNF24	14.9	42.155	11.582	14	4	4	4	0	3	2	4	1	3	4	3	3	3	3	3	4	3	3	3	3	87042000	52943000	81656000	68880000	79259000	48126000	1.25	0.76	1.172	0.989	1.138	0.691	0.685	1.77E-02
P17050	Alpha-N-acetylgalactosaminidase	NAGA	13.4	46.564	17.539	16	5	5	2	6	1	1	2	4	4	5	5	4	5	4	4	5	5	4	5	4	247120000	211610000	208290000	182930000	215830000	196240000	1.175	1.006	0.99	0.87	1.026	0.933	0.88	1.38E-01
P17096	High mobility group protein HMG-I/HMG-Y	HMGA1	23.4	11.676	14.248	30	3	3	5	5	4	6	5	5	2	2	2	2	3	3	2	2	2	2	3	3	172330000	195300000	198540000	192980000	178910000	204090000	0.905	1.026	1.043	1.014	0.94	1.072	1.077	1.73E-01
P17152	Transmembrane protein 11, mitochondrial	TMEM11	18.2	21.541	9.7306	17	3	3	2	3	3	3	3	3	3	3	3	3	3	3	3	3	3	3	3	3	305120000	253820000	253600000	227050000	314450000	312460000	1.099	0.914	0.913	0.817	1.132	1.125	0.909	4.46E-01
P17174	Aspartate aminotransferase, cytoplasmic	GOT1	52.8	46.247	65.055	110	15	15	17	21	17	18	17	20	15	15	15	15	14	14	15	15	15	15	14	14	1147600000	1175900000	1165300000	1045400000	1255400000	1168200000	0.99	1.014	1.005	0.901	1.083	1.007	0.95	3.31E-01
P17252	Protein kinase C alpha type	PRKCA	10.6	76.749	14.244	14	4	4	1	3	1	5	1	3	3	2	3	4	3	4	3	2	3	4	3	4	43531000	104020000	69566000	113150000	52770000	132740000	0.506	1.21	0.809	1.316	0.614	1.544	2.11	5.76E-03
P17275	Transcription factor jun-B	JUNB	38.9	35.879	108.07	43	8	8	7	6	8	8	7	7	5	6	8	6	6	6	5	6	8	6	6	6	278730000	209470000	303620000	226430000	246700000	226310000	1.121	0.843	1.222	0.911	0.993	0.911	0.799	3.31E-02
P17301	Integrin alpha-2	ITGA2	28.6	129.29	108.36	147	25	25	25	25	22	25	25	25	23	24	23	23	22	23	23	24	23	23	22	23	1507600000	1385000000	1531400000	1524900000	1530900000	1494200000	1.008	0.926	1.024	1.02	1.024	0.999	0.964	2.70E-01
P17405	Sphingomyelin phosphodiesterase	SMPD1	5.2	69.751	5.921	8	3	3	1	1	2	1	1	2	3	2	2	2	3	3	3	2	2	2	3	3	47257000	40080000	36070000	49130000	41226000	39759000	1.118	0.949	0.854	1.163	0.976	0.941	1.035	7.58E-01
P17480	Nucleolar transcription factor 1	UBTF	13.6	89.405	45.898	51	8	8	10	7	9	7	8	10	8	7	7	7	7	8	8	7	7	7	7	8	287690000	314650000	290170000	297300000	314280000	314650000	0.949	1.038	0.957	0.981	1.037	1.038	1.039	3.26E-01
P17535	Transcription factor jun-D	JUND	12.4	35.173	12.979	7	3	2	2	1	1	1	1	1	3	3	2	3	3	2	2	2	2	2	2	2	66986000	101440000	72545000	107390000	69611000	97179000	0.78	1.181	0.845	1.251	0.811	1.132	1.463	6.61E-04
P17544	Cyclic AMP-dependent transcription factor ATF-7	ATF7	9.5	52.967	23.015	8	3	2	2	1	2	1	1	1	3	2	2	2	2	1	2	2	2	2	2	1	38908000	38093000	30687000	38076000	34134000	0	1.081	1.059	0.853	1.058	0.949		1.101	2.79E-01
P17568	NADH dehydrogenase [ubiquinone] 1 beta subcomplex subunit 7	NDUFB7	51.1	16.402	24.395	34	5	5	5	5	8	7	4	5	4	5	5	5	5	5	4	5	5	5	5	5	356580000	381750000	391110000	309910000	373140000	353890000	0.988	1.057	1.083	0.858	1.033	0.98	0.933	3.40E-01
P17612	cAMP-dependent protein kinase catalytic subunit alpha	PRKACA	18.8	40.589	12.695	18	7	7	4	2	2	1	4	5	6	5	5	5	5	6	6	5	5	5	5	6	160480000	141720000	166520000	171760000	201110000	183870000	0.939	0.829	0.974	1.005	1.177	1.076	0.942	5.96E-01
P17655	Calpain-2 catalytic subunit	CAPN2	38.6	79.994	109.43	99	18	18	17	15	16	16	18	17	16	16	16	15	16	18	16	16	16	15	16	18	787310000	935590000	844880000	902330000	811950000	936810000	0.905	1.076	0.971	1.037	0.933	1.077	1.135	5.44E-03
P17676	CCAAT/enhancer-binding protein beta	CEBPB	11.9	36.105	24.392	20	3	3	3	4	3	3	3	4	3	3	3	2	3	3	3	3	3	2	3	3	138500000	129890000	96646000	106280000	111070000	94183000	1.228	1.152	0.857	0.943	0.985	0.835	0.954	7.60E-01
P17706	Tyrosine-protein phosphatase non-receptor type 2	PTPN2	26	48.473	71.787	36	9	9	6	4	5	6	8	7	8	6	6	6	7	8	8	6	6	6	7	8	240350000	327260000	272700000	287590000	245400000	269610000	0.878	1.195	0.996	1.05	0.896	0.985	1.166	1.01E-01
P17812	CTP synthase 1	CTPS1	45.3	66.69	84.368	103	21	20	15	15	18	20	18	17	16	19	19	17	19	20	15	18	18	16	18	19	1038800000	1117700000	930550000	1133400000	996930000	1100100000	0.987	1.062	0.884	1.076	0.947	1.045	1.13	1.76E-02
P17844	Probable ATP-dependent RNA helicase DDX5	DDX5	65.1	69.147	201.93	326	38	29	52	56	53	58	54	53	36	35	33	33	37	35	27	26	24	24	28	26	15238000000	13936000000	14765000000	14578000000	14801000000	14129000000	1.046	0.956	1.013	1	1.016	0.969	0.952	4.16E-02
P17858	ATP-dependent 6-phosphofructokinase, liver type	PFKL	30.1	85.018	57.481	73	18	14	11	12	12	15	10	13	16	17	16	16	15	17	12	13	12	12	11	13	435790000	593800000	497160000	556300000	527810000	560670000	0.824	1.123	0.941	1.052	0.999	1.061	1.171	4.77E-02
P17900	Ganglioside GM2 activator	GM2A	32.6	20.838	9.3077	16	4	4	5	1	3	3	3	1	4	3	4	4	4	4	4	3	4	4	4	4	125960000	102050000	118330000	100280000	101170000	102680000	1.162	0.941	1.091	0.925	0.933	0.947	0.883	2.09E-01
P17931	Galectin-3	LGALS3	37.2	26.152	64.54	89	11	11	17	12	15	15	16	14	11	11	11	11	11	11	11	11	11	11	11	11	2303700000	1728400000	2593300000	1738200000	2741300000	2068900000	1.049	0.787	1.181	0.792	1.249	0.942	0.725	1.47E-02
P17980	26S protease regulatory subunit 6A	PSMC3	63.8	49.203	169.16	194	23	23	31	34	34	31	30	34	22	21	23	22	22	22	22	21	23	22	22	22	3337200000	4040400000	3295900000	3744500000	3227000000	4006100000	0.925	1.12	0.913	1.038	0.894	1.11	1.196	2.86E-03
P17987	T-complex protein 1 subunit alpha	TCP1	70.5	60.343	163.87	299	32	32	44	51	41	62	47	54	30	30	29	31	31	31	30	30	29	31	31	31	10011000000	10817000000	9835300000	10957000000	10108000000	11061000000	0.957	1.034	0.94	1.047	0.966	1.057	1.096	8.41E-04
P18031	Tyrosine-protein phosphatase non-receptor type 1	PTPN1	57.5	49.966	135.01	200	20	20	33	32	33	32	35	35	18	19	18	18	19	19	18	19	18	18	19	19	4479300000	4202900000	4643200000	4338800000	4656000000	4137800000	1.016	0.953	1.053	0.984	1.056	0.938	0.92	1.11E-02
P18074	TFIIH basal transcription factor complex helicase XPD subunit	ERCC2	20.8	86.908	44.635	29	11	11	4	5	7	3	8	2	10	10	9	7	11	9	10	10	9	7	11	9	344650000	279010000	311220000	293060000	357620000	285680000	1.105	0.895	0.998	0.94	1.147	0.916	0.846	2.27E-02
P18077	60S ribosomal protein L35a	RPL35A	46.4	12.538	6.4612	40	6	6	6	7	6	6	8	7	6	6	5	6	6	6	6	6	5	6	6	6	3719500000	4848400000	4271900000	4381400000	4524000000	4372400000	0.854	1.114	0.981	1.007	1.039	1.004	1.087	2.72E-01
P18084	Integrin beta-5	ITGB5	23.8	88.053	48.524	62	16	16	10	10	11	10	13	8	14	15	14	15	15	12	14	15	14	15	15	12	473290000	262710000	404180000	314730000	449470000	278700000	1.301	0.722	1.111	0.865	1.235	0.766	0.645	3.50E-03
P18085	ADP-ribosylation factor 4	ARF4	71.1	20.511	75.671	103	9	6	14	19	15	22	18	15	9	8	9	9	9	9	6	5	6	6	6	6	2831800000	3135100000	2943400000	3185800000	2585900000	2976800000	0.962	1.065	1	1.082	0.879	1.011	1.112	6.40E-02
P18124	60S ribosomal protein L7	RPL7	57.3	29.225	86.189	146	18	18	25	29	22	26	21	23	16	17	17	17	17	17	16	17	17	17	17	17	10050000000	9982300000	10691000000	9875600000	10467000000	9916000000	0.989	0.982	1.052	0.972	1.03	0.976	0.954	6.60E-02
P18206	Vinculin	VCL	55.8	123.8	323.31	368	52	52	62	65	59	59	64	59	51	51	49	51	50	51	51	51	49	51	50	51	5282400000	5156400000	5370900000	5286100000	5398100000	5270900000	0.998	0.974	1.015	0.998	1.02	0.996	0.979	1.04E-01
P18583	Protein SON	SON	30.3	263.83	323.31	290	47	47	47	49	45	46	51	52	42	42	46	46	45	45	42	42	46	46	45	45	4261000000	3866800000	4353700000	3902200000	4220500000	3610900000	1.056	0.958	1.079	0.967	1.046	0.895	0.887	8.30E-03
P18615	Negative elongation factor E	NELFE	30.8	43.239	41.47	28	8	8	2	6	4	5	5	6	4	7	5	6	5	6	4	7	5	6	5	6	144860000	199810000	213070000	208290000	195740000	187600000	0.756	1.043	1.112	1.087	1.022	0.979	1.076	5.47E-01
P18621	60S ribosomal protein L17	RPL17	46.2	21.397	37.212	110	7	7	21	13	21	18	22	15	7	7	7	7	7	7	7	7	7	7	7	7	4410400000	5287700000	3773500000	5196200000	4627200000	5373600000	0.923	1.107	0.79	1.088	0.968	1.125	1.238	1.77E-02
P18669	Phosphoglycerate mutase 1	PGAM1	72.8	28.804	213	187	16	16	30	32	26	37	28	34	13	15	15	15	14	14	13	15	15	15	14	14	9717700000	9035400000	9209900000	9565800000	9317700000	8277100000	1.058	0.983	1.002	1.041	1.014	0.901	0.952	3.23E-01
P18754	Regulator of chromosome condensation	RCC1	69.4	44.969	179.6	145	17	17	24	22	27	22	25	25	16	16	16	15	16	16	16	16	16	15	16	16	3022900000	2523400000	3011900000	2509000000	2884800000	2701800000	1.089	0.909	1.085	0.904	1.039	0.973	0.867	6.58E-03
P18827	Syndecan-1	SDC1	15.8	32.461	36.038	19	5	5	3	5	3	3	2	3	4	5	5	4	3	3	4	5	5	4	3	3	347820000	525880000	399870000	484680000	397980000	391810000	0.819	1.238	0.942	1.141	0.937	0.923	1.224	1.18E-01
P18858	DNA ligase 1	LIG1	22.5	101.73	42.374	47	16	16	8	6	7	9	8	9	14	13	11	13	13	11	14	13	11	13	13	11	272350000	387380000	272360000	350130000	284290000	340550000	0.857	1.219	0.857	1.102	0.894	1.071	1.3	5.00E-03
P18859	ATP synthase-coupling factor 6, mitochondrial	ATP5J	50.9	12.587	38.634	50	5	5	11	6	9	7	10	7	5	4	4	4	4	4	5	4	4	4	4	4	1505200000	1336300000	1469500000	1344900000	1438900000	1439800000	1.058	0.939	1.033	0.945	1.012	1.012	0.934	6.35E-02
P18887	DNA repair protein XRCC1	XRCC1	25.4	69.476	33.015	40	14	14	7	4	5	7	8	9	13	9	12	12	12	10	13	9	12	12	12	10	343090000	356410000	343390000	344760000	337540000	337420000	0.998	1.037	0.999	1.003	0.982	0.982	1.014	4.53E-01
P19021	Peptidyl-glycine alpha-amidating monooxygenase	PAM	2.7	108.33	4.0563	5	2	2	2	0	1	0	2	0	2	1	2	2	2	1	2	1	2	2	2	1	40761000	0	28562000	27513000	34993000	0	1.237		0.867	0.835	1.062		0.791
P19105	Myosin regulatory light chain 12A	MYL12A	50.9	19.794	111.99	74	7	7	9	15	10	14	10	16	7	7	7	7	7	7	7	7	7	7	7	7	1937000000	2396000000	2035400000	2558700000	2017600000	2483000000	0.866	1.071	0.909	1.143	0.902	1.109	1.242	9.95E-04
P19174	1-phosphatidylinositol 4,5-bisphosphate phosphodiesterase gamma-1	PLCG1	5	148.53	14.214	10	5	5	1	1	0	1	4	3	3	4	3	4	5	3	3	4	3	4	5	3	38864000	47587000	0	73853000	85500000	72765000	0.61	0.747		1.159	1.342	1.142	1.041	9.09E-01
P19256	Lymphocyte function-associated antigen 3	CD58	13.2	28.147	11.632	16	3	3	2	3	1	4	3	3	3	3	3	3	3	3	3	3	3	3	3	3	152100000	159100000	170940000	151850000	188790000	164660000	0.924	0.967	1.039	0.923	1.147	1.001	0.929	3.43E-01
P19338	Nucleolin	NCL	35.2	76.613	211.89	353	31	31	55	54	54	65	61	64	31	31	31	30	30	31	31	31	31	30	30	31	32363000000	33001000000	34367000000	33193000000	32540000000	33834000000	0.974	0.994	1.035	0.999	0.98	1.019	1.008	7.32E-01
P19367	Hexokinase-1	HK1	52.8	102.48	246.09	339	41	37	52	60	52	62	53	60	41	41	40	41	40	40	37	37	36	37	36	36	8399900000	9781300000	8664900000	9418000000	8815500000	9631300000	0.921	1.073	0.95	1.033	0.967	1.056	1.114	3.62E-03
P19387	DNA-directed RNA polymerase II subunit RPB3	POLR2C	59.3	31.441	53.708	43	10	10	5	10	7	5	8	8	8	8	8	7	8	8	8	8	8	7	8	8	476540000	475360000	500150000	430750000	491920000	406340000	1.028	1.026	1.079	0.929	1.061	0.877	0.894	7.14E-02
P19388	DNA-directed RNA polymerases I, II, and III subunit RPABC1	POLR2E	62.9	24.551	89.725	81	10	10	14	12	12	17	13	13	10	9	9	10	9	9	10	9	9	10	9	9	926620000	1114500000	991340000	1043100000	942990000	961390000	0.93	1.118	0.995	1.047	0.946	0.965	1.09	1.50E-01
P19404	NADH dehydrogenase [ubiquinone] flavoprotein 2, mitochondrial	NDUFV2	47.8	27.391	50.917	65	10	10	10	11	13	9	12	10	9	9	9	8	10	8	9	9	9	8	10	8	879410000	843820000	918970000	793210000	911480000	769660000	1.031	0.99	1.078	0.93	1.069	0.903	0.888	1.56E-02
P19447	TFIIH basal transcription factor complex helicase XPB subunit	ERCC3	33.1	89.277	119.02	93	16	16	14	17	17	16	15	14	14	14	14	15	14	14	14	14	14	15	14	14	549650000	542430000	530010000	504000000	522890000	543160000	1.033	1.02	0.996	0.947	0.983	1.021	0.992	7.90E-01
P19474	E3 ubiquitin-protein ligase TRIM21	TRIM21	4	54.169	2.286	5	2	2	0	2	1	1	1	0	0	2	2	1	2	1	0	2	2	1	2	1	0	26037000	25301000	0	0	0		1.014	0.986				1.029
P19525	Interferon-induced, double-stranded RNA-activated protein kinase	EIF2AK2	31.9	62.094	60.504	107	14	14	18	18	17	17	20	17	14	14	14	13	14	14	14	14	14	13	14	14	1198400000	1176500000	1109400000	1211400000	1168500000	1133900000	1.027	1.009	0.951	1.039	1.002	0.972	1.013	6.82E-01
P19623	Spermidine synthase	SRM	35.4	33.824	46.05	25	7	7	4	5	4	6	1	5	6	7	5	6	5	7	6	7	5	6	5	7	184850000	242240000	168530000	272860000	136510000	216250000	0.908	1.19	0.828	1.341	0.671	1.062	1.493	2.06E-02
P19634	Sodium/hydrogen exchanger 1	SLC9A1	13.1	90.762	29.936	16	6	6	3	3	1	2	4	3	5	5	6	4	5	4	5	5	6	4	5	4	108040000	147690000	80391000	211410000	93722000	153950000	0.815	1.114	0.607	1.595	0.707	1.162	1.818	2.42E-02
P19784	Casein kinase II subunit alpha'	CSNK2A2	51.4	41.213	70.638	87	13	13	16	15	14	18	14	10	13	13	13	13	12	12	13	13	13	13	12	12	946910000	944310000	844560000	927770000	973340000	1060500000	0.997	0.994	0.889	0.977	1.025	1.117	1.061	3.85E-01
P19838	Nuclear factor NF-kappa-B p105 subunit	NFKB1	12.3	105.35	83.23	32	8	8	6	4	8	4	5	5	7	7	8	7	7	6	7	7	8	7	7	6	153130000	164080000	154190000	152540000	135810000	192300000	0.965	1.034	0.972	0.961	0.856	1.212	1.148	1.73E-01
P20020	Plasma membrane calcium-transporting ATPase 1	ATP2B1	27.3	138.75	121.87	142	26	14	22	26	24	24	22	24	23	24	22	21	21	23	12	13	12	12	12	13	1596100000	1467800000	1526500000	1394300000	1577800000	1381500000	1.071	0.985	1.024	0.935	1.058	0.927	0.903	1.10E-02
P20042	Eukaryotic translation initiation factor 2 subunit 2	EIF2S2	71.8	38.388	205.7	172	22	22	25	33	26	30	31	27	19	19	20	20	21	18	19	19	20	20	21	18	3543800000	4089300000	3671500000	3877900000	3588300000	4165500000	0.927	1.07	0.96	1.014	0.939	1.09	1.123	9.16E-03
P20073	Annexin A7	ANXA7	34.6	52.739	119.17	91	16	16	16	19	11	18	11	16	14	13	13	15	14	14	14	13	13	15	14	14	1135100000	1508400000	1157600000	1636000000	1184100000	1525200000	0.836	1.111	0.853	1.205	0.872	1.123	1.343	7.22E-04
P20226	TATA-box-binding protein	TBP	15	37.698	11.892	16	3	3	3	4	3	2	2	2	3	2	3	3	3	3	3	2	3	3	3	3	148580000	127920000	110280000	140800000	126810000	111770000	1.164	1.002	0.864	1.103	0.993	0.875	0.987	9.07E-01
P20290	Transcription factor BTF3	BTF3	61.2	22.168	79.54	63	8	8	10	11	11	10	11	10	8	8	7	8	8	8	8	8	7	8	8	8	1373700000	1572300000	1562000000	1688700000	1427200000	1725900000	0.882	1.009	1.002	1.084	0.916	1.108	1.143	4.58E-02
P20339	Ras-related protein Rab-5A	RAB5A	41.4	23.658	37.854	23	7	4	5	3	4	4	4	3	7	7	7	6	7	7	4	4	4	3	4	4	148550000	124630000	146720000	126020000	161140000	130510000	1.064	0.893	1.051	0.903	1.154	0.935	0.835	6.72E-03
P20340	Ras-related protein Rab-6A	RAB6A	64.4	23.593	49.22	96	12	11	17	15	17	14	21	12	11	9	12	8	12	10	10	9	11	8	11	10	5134500000	3014300000	5117500000	2844900000	4810800000	2830400000	1.297	0.761	1.293	0.719	1.215	0.715	0.577	6.05E-05
P20585	DNA mismatch repair protein Msh3	MSH3	5.3	127.41	32.002	7	3	3	1	3	1	0	0	2	2	3	2	1	2	3	2	3	2	1	2	3	34837000	31510000	34192000	0	45390000	39983000	0.937	0.847	0.92		1.221	1.075	0.937	7.00E-01
P20618	Proteasome subunit beta type-1	PSMB1	56.4	26.489	53.585	69	9	9	9	13	9	12	12	14	7	9	7	8	9	9	7	9	7	8	9	9	1548000000	1520700000	1548300000	1438500000	1556500000	1368900000	1.034	1.016	1.034	0.961	1.04	0.915	0.93	1.33E-01
P20645	Cation-dependent mannose-6-phosphate receptor	M6PR	37.5	30.993	93.748	67	7	7	10	11	10	12	12	12	7	7	7	7	7	7	7	7	7	7	7	7	2925200000	2388000000	3197400000	2496500000	2940100000	2373600000	1.075	0.878	1.175	0.918	1.081	0.873	0.801	3.38E-03
P20674	Cytochrome c oxidase subunit 5A, mitochondrial	COX5A	51.3	16.762	39.435	88	9	9	16	13	16	13	15	15	9	9	9	9	9	8	9	9	9	9	9	8	3474500000	3562600000	3135000000	3407100000	3363000000	2984000000	1.046	1.073	0.944	1.026	1.013	0.899	0.998	9.76E-01
P20700	Lamin-B1	LMNB1	60.8	66.408	323.31	352	36	33	61	62	55	60	57	57	35	36	34	35	35	35	32	33	31	32	32	32	19773000000	16126000000	18716000000	16546000000	19145000000	17276000000	1.103	0.899	1.044	0.923	1.068	0.964	0.867	4.90E-03
P20810	Calpastatin	CAST	46.6	76.572	192.58	117	19	19	17	23	23	16	20	18	13	13	15	14	16	10	13	13	15	14	16	10	957140000	1257400000	1033100000	1187000000	1101100000	1109800000	0.864	1.135	0.933	1.072	0.994	1.002	1.15	6.06E-02
P20839	Inosine-5'-monophosphate dehydrogenase 1	IMPDH1	17.7	55.405	19.707	21	7	6	3	3	3	4	4	4	4	6	6	6	5	5	3	5	5	5	4	4	130470000	124700000	129090000	180760000	145930000	203050000	0.856	0.819	0.847	1.187	0.958	1.333	1.254	2.25E-01
P20936	Ras GTPase-activating protein 1	RASA1	4.7	116.4	9.5627	15	4	4	3	3	2	2	2	3	4	4	3	3	4	4	4	4	3	3	4	4	55314000	56126000	61501000	55269000	39261000	57123000	1.022	1.037	1.137	1.022	0.726	1.056	1.08	5.96E-01
P21127	Cyclin-dependent kinase 11B	CDK11B	22.8	92.706	54.432	73	18	2	13	14	10	10	12	14	15	17	15	15	14	16	1	2	1	1	1	1	547000000	647510000	502290000	663200000	549780000	637260000	0.925	1.095	0.85	1.122	0.93	1.078	1.218	2.46E-03
P21281	V-type proton ATPase subunit B, brain isoform	ATP6V1B2	54.8	56.5	129.12	97	19	19	16	16	20	16	14	15	17	17	17	15	15	16	17	17	17	15	15	16	1036200000	1154800000	1128100000	1178100000	1082400000	1155300000	0.923	1.029	1.005	1.05	0.964	1.029	1.074	4.35E-02
P21283	V-type proton ATPase subunit C 1	ATP6V1C1	36.9	43.941	22.253	44	14	14	8	6	8	6	8	8	8	11	11	10	11	12	8	11	11	10	11	12	518400000	502630000	501680000	581220000	567030000	574390000	0.958	0.929	0.928	1.075	1.048	1.062	1.045	4.98E-01
P21291	Cysteine and glycine-rich protein 1	CSRP1	50.8	20.567	71.111	72	8	8	13	14	10	13	11	11	7	7	7	7	8	7	7	7	7	7	8	7	1430400000	1260800000	1389200000	1130300000	1554000000	1559800000	1.031	0.909	1.001	0.815	1.12	1.124	0.903	3.60E-01
P21333	Filamin-A	FLNA	67.9	280.74	323.31	1271	129	115	202	209	207	219	222	212	127	126	128	127	128	125	113	112	114	113	114	111	46798000000	47803000000	48334000000	48003000000	48169000000	48331000000	0.977	0.998	1.009	1.002	1.005	1.009	1.006	6.14E-01
P21359	Neurofibromin	NF1	11.4	319.37	69.644	48	27	27	6	10	5	10	9	8	19	17	20	22	19	17	19	17	20	22	19	17	312520000	296600000	302710000	297740000	286640000	285930000	1.052	0.999	1.019	1.002	0.965	0.963	0.976	4.41E-01
P21675	Transcription initiation factor TFIID subunit 1	TAF1	2.9	212.67	7.9048	6	3	3	0	1	0	1	1	3	2	2	2	2	1	3	2	2	2	2	1	3	31221000	53522000	23598000	31165000	0	48350000	0.831	1.425	0.628	0.829		1.287	1.618	1.62E-01
P21796	Voltage-dependent anion-selective channel protein 1	VDAC1	77	30.772	241.2	439	17	17	63	83	72	73	76	72	17	17	17	17	17	17	17	17	17	17	17	17	22906000000	20687000000	21365000000	21636000000	22379000000	23505000000	1.037	0.937	0.968	0.98	1.014	1.065	0.988	7.86E-01
P21802	Fibroblast growth factor receptor 2	FGFR2	5.1	92.024	6.6249	10	4	2	2	2	1	2	2	1	3	2	2	4	3	2	1	1	1	2	1	1	83190000	0	0	66845000	63365000	0	1.169			0.94	0.891		0.912
P21912	Succinate dehydrogenase [ubiquinone] iron-sulfur subunit, mitochondrial	SDHB	36.1	31.629	45.666	88	11	11	12	16	12	16	16	16	11	11	11	11	11	11	11	11	11	11	11	11	2212100000	1813200000	1957700000	1884600000	2009800000	1876600000	1.129	0.926	0.999	0.962	1.026	0.958	0.902	6.70E-02
P21926	CD9 antigen	CD9	18.4	25.416	32.67	29	4	4	6	4	4	4	6	5	4	4	4	4	4	4	4	4	4	4	4	4	2220700000	2134000000	2262700000	2190800000	2411400000	2370800000	0.98	0.942	0.999	0.967	1.065	1.047	0.971	5.10E-01
P21953	2-oxoisovalerate dehydrogenase subunit beta, mitochondrial	BCKDHB	19.1	43.122	31.921	32	4	4	6	6	6	4	5	5	4	4	4	4	4	4	4	4	4	4	4	4	212630000	187850000	211200000	206460000	211000000	230750000	1.013	0.895	1.006	0.983	1.005	1.099	0.985	8.18E-01
P21964	Catechol O-methyltransferase	COMT	67.9	30.037	124.57	116	14	14	18	19	19	20	20	20	13	14	14	14	14	14	13	14	14	14	14	14	2197300000	2193900000	2034200000	2358200000	2259300000	2406300000	0.98	0.979	0.908	1.052	1.008	1.074	1.072	1.69E-01
P21980	Protein-glutamine gamma-glutamyltransferase 2	TGM2	53.3	77.328	153.15	197	28	27	36	31	34	30	30	36	25	26	24	28	25	27	24	25	23	27	24	26	4491500000	3927200000	4463200000	4185300000	4391600000	4110700000	1.054	0.922	1.047	0.982	1.031	0.965	0.916	1.04E-02
P22033	Methylmalonyl-CoA mutase, mitochondrial	MUT	25.1	83.134	87.554	72	13	13	11	12	13	13	13	10	12	12	10	11	13	10	12	12	10	11	13	10	465300000	426660000	381020000	415660000	404380000	413640000	1.114	1.021	0.912	0.995	0.968	0.99	1.004	9.48E-01
P22059	Oxysterol-binding protein 1	OSBP	39.7	89.42	91.127	104	20	20	16	16	12	22	16	22	16	16	16	17	18	18	16	16	16	17	18	18	853260000	929860000	806240000	998780000	820350000	911170000	0.962	1.049	0.909	1.127	0.925	1.028	1.145	1.62E-02
P22061	Protein-L-isoaspartate(D-aspartate) O-methyltransferase	PCMT1	48.5	24.636	92.746	72	9	9	15	13	11	13	10	10	9	8	8	9	8	8	9	8	8	9	8	8	694510000	727300000	618230000	812920000	672110000	863970000	0.949	0.994	0.845	1.111	0.919	1.181	1.211	3.81E-02
P22087	rRNA 2'-O-methyltransferase fibrillarin	FBL	62.9	33.784	124.24	228	16	14	38	37	40	40	36	37	16	15	16	15	16	15	14	13	14	13	14	13	8403900000	6394200000	8634800000	6337200000	8299400000	6193200000	1.139	0.867	1.17	0.859	1.125	0.84	0.747	5.53E-05
P22102	Trifunctional purine biosynthetic protein adenosine-3	GART	56.1	107.77	277.1	296	42	42	50	51	46	51	46	52	41	39	39	38	39	39	41	39	39	38	39	39	4953800000	5316500000	4904600000	5256400000	5023600000	5461800000	0.961	1.032	0.952	1.02	0.975	1.06	1.077	5.38E-03
P22223	Cadherin-3	CDH3	42.7	91.417	243.39	216	24	22	34	41	36	35	36	34	22	22	22	23	22	22	20	21	20	21	21	21	4100300000	4385600000	4351600000	4455800000	4380900000	4705300000	0.933	0.998	0.99	1.013	0.996	1.07	1.056	1.45E-01
P22234	Multifunctional protein ADE2	PAICS	42.4	47.079	169.98	144	18	18	21	25	22	26	22	28	18	17	17	18	18	17	18	17	17	18	18	17	3238500000	3712000000	3269800000	3637200000	3202500000	3534200000	0.944	1.081	0.953	1.06	0.933	1.03	1.121	2.08E-03
P22304	Iduronate 2-sulfatase	IDS	8.4	61.872	13.499	8	3	3	1	1	1	1	2	2	2	2	2	2	2	3	2	2	2	2	2	3	52858000	50078000	48890000	51866000	53706000	47824000	1.039	0.984	0.961	1.02	1.056	0.94	0.963	3.73E-01
P22307	Non-specific lipid-transfer protein	SCP2	20.1	58.993	57.525	97	13	13	15	16	17	15	21	13	13	13	13	13	13	13	13	13	13	13	13	13	2006900000	1980300000	2133500000	1927200000	2192500000	2015600000	0.982	0.969	1.044	0.943	1.073	0.987	0.935	8.68E-02
P22314	Ubiquitin-like modifier-activating enzyme 1	UBA1	55.3	117.85	323.31	322	41	41	47	64	53	52	49	57	36	39	38	38	37	39	36	39	38	38	37	39	7807700000	8512000000	8342100000	9241300000	7775200000	8852900000	0.927	1.011	0.991	1.097	0.923	1.051	1.112	3.30E-02
P22392	Nucleoside diphosphate kinase B	NME2	76.3	17.298	78.954	150	11	1	25	26	20	28	24	27	11	10	10	10	10	10	1	1	1	1	1	1	11330000000	12911000000	10795000000	12230000000	11861000000	11891000000	0.957	1.091	0.912	1.033	1.002	1.005	1.09	7.74E-02
P22415	Upstream stimulatory factor 1	USF1	12.6	33.538	19.525	7	3	3	1	3	1	1	1	0	3	2	3	3	3	3	3	2	3	3	3	3	76528000	122660000	78914000	95967000	55269000	67746000	0.924	1.481	0.953	1.158	0.667	0.818	1.359	2.24E-01
P22570	NADPH:adrenodoxin oxidoreductase, mitochondrial	FDXR	56	53.836	74.017	135	24	24	25	21	21	28	20	20	21	18	22	22	22	17	21	18	22	22	22	17	1686400000	1518400000	1639900000	1638100000	1613200000	1695800000	1.033	0.93	1.005	1.004	0.989	1.039	0.982	6.34E-01
P22626	Heterogeneous nuclear ribonucleoproteins A2/B1	HNRNPA2B1	72.2	37.429	201.56	508	23	23	79	87	87	82	89	84	22	22	22	22	22	22	22	22	22	22	22	22	82396000000	68262000000	83609000000	69700000000	82121000000	70044000000	1.084	0.898	1.1	0.917	1.08	0.921	0.838	4.36E-05
P22670	MHC class II regulatory factor RFX1	RFX1	12	104.76	36.314	22	7	7	5	5	1	4	4	3	7	5	3	5	6	5	7	5	3	5	6	5	127160000	131830000	0	132460000	118430000	148170000	0.966	1.002		1.006	0.9	1.126	1.12	1.50E-01
P22676	Calretinin	CALB2	32.8	31.54	35.916	35	9	9	6	6	6	6	5	6	7	7	8	7	7	7	7	7	8	7	7	7	369450000	495980000	382760000	490670000	405800000	448510000	0.855	1.148	0.886	1.135	0.939	1.038	1.239	7.36E-03
P22681	E3 ubiquitin-protein ligase CBL	CBL	6.8	99.632	8.3136	8	4	4	1	3	1	0	3	0	2	4	3	2	3	2	2	4	3	2	3	2	64613000	54451000	59418000	69547000	61973000	58461000	1.052	0.887	0.968	1.132	1.009	0.952	0.981	8.16E-01
P22695	Cytochrome b-c1 complex subunit 2, mitochondrial	UQCRC2	75.5	48.442	253.83	304	24	24	51	53	50	50	47	53	23	21	22	22	23	23	23	21	22	22	23	23	10213000000	9214800000	9769700000	9234300000	10843000000	9404000000	1.044	0.942	0.999	0.944	1.109	0.962	0.904	3.54E-02
P22830	Ferrochelatase, mitochondrial	FECH	32.4	47.862	64.769	47	11	11	6	6	7	9	12	7	8	7	9	9	10	8	8	7	9	9	10	8	625340000	471150000	547260000	471540000	580460000	471910000	1.184	0.892	1.037	0.893	1.099	0.894	0.807	3.79E-02
P23025	DNA repair protein complementing XP-A cells	XPA	14.3	31.368	29.553	9	2	2	2	1	1	2	2	1	2	2	2	2	2	2	2	2	2	2	2	2	42512000	63557000	47782000	70348000	47115000	52059000	0.789	1.179	0.887	1.305	0.874	0.966	1.353	4.43E-02
P23193	Transcription elongation factor A protein 1	TCEA1	35.2	33.969	31.147	46	9	9	8	7	7	8	8	8	9	9	8	9	9	8	9	9	8	9	9	8	462660000	421660000	450960000	426650000	439340000	375270000	1.077	0.982	1.05	0.994	1.023	0.874	0.904	7.14E-02
P23229	Integrin alpha-6	ITGA6	46	126.6	322.83	281	40	40	45	47	45	52	44	48	38	37	39	38	38	39	38	37	39	38	38	39	5253100000	6077400000	5697600000	5843000000	5616900000	5768700000	0.92	1.064	0.998	1.023	0.984	1.01	1.068	8.66E-02
P23246	Splicing factor, proline- and glutamine-rich	SFPQ	40.9	76.149	302.28	373	28	27	61	64	64	63	64	57	28	27	26	27	28	25	27	26	26	26	27	24	18919000000	15962000000	19598000000	15324000000	19848000000	16156000000	1.073	0.905	1.111	0.869	1.126	0.916	0.813	6.23E-04
P23258	Tubulin gamma-1 chain	TUBG1	45.5	51.169	102.82	74	12	12	12	11	12	14	12	13	12	12	12	12	12	12	12	12	12	12	12	12	747970000	819700000	764300000	786520000	758170000	809090000	0.958	1.05	0.979	1.007	0.971	1.036	1.064	1.14E-02
P23284	Peptidyl-prolyl cis-trans isomerase B	PPIB	53.2	23.742	73.997	196	12	12	36	33	29	32	33	33	12	11	12	12	12	12	12	11	12	12	12	12	16538000000	15049000000	16882000000	14339000000	16799000000	16048000000	1.037	0.944	1.059	0.899	1.054	1.007	0.905	3.46E-02
P23368	NAD-dependent malic enzyme, mitochondrial	ME2	64.9	65.443	180.59	166	27	27	29	28	29	25	30	25	22	25	25	24	26	25	22	25	25	24	26	25	2567100000	2613700000	2348200000	2523900000	2431900000	2492400000	1.028	1.047	0.941	1.011	0.974	0.998	1.038	2.68E-01
P23381	Tryptophan--tRNA ligase, cytoplasmic	WARS	56.9	53.165	121.68	104	17	17	16	18	16	19	15	20	15	17	16	17	14	16	15	17	16	17	14	16	1074800000	1297000000	1166900000	1336400000	1018600000	1218100000	0.907	1.094	0.984	1.127	0.859	1.028	1.181	2.38E-02
P23396	40S ribosomal protein S3	RPS3	80.7	26.688	85.411	273	20	20	44	46	42	48	46	47	19	18	19	18	18	19	19	18	19	18	18	19	14524000000	18546000000	14582000000	18163000000	15405000000	19560000000	0.865	1.104	0.868	1.081	0.917	1.165	1.264	1.48E-03
P23434	Glycine cleavage system H protein, mitochondrial	GCSH	38.7	18.884	64.066	50	3	3	9	7	8	9	8	9	3	3	3	3	3	3	3	3	3	3	3	3	1266300000	1565100000	1319500000	2054800000	1329300000	1626800000	0.829	1.025	0.864	1.346	0.871	1.065	1.34	1.04E-01
P23458	Tyrosine-protein kinase JAK1	JAK1	8.4	133.28	10.558	21	9	9	3	4	3	2	6	3	6	6	7	4	7	5	6	6	7	4	7	5	89442000	99577000	96710000	90923000	93888000	74470000	0.985	1.096	1.065	1.001	1.034	0.82	0.946	5.48E-01
P23470	Receptor-type tyrosine-protein phosphatase gamma	PTPRG	9.8	162	45.496	39	11	11	5	5	7	9	6	7	6	9	9	10	7	10	6	9	9	10	7	10	240940000	198390000	228120000	227730000	243340000	196770000	1.083	0.891	1.025	1.023	1.093	0.884	0.874	5.50E-02
P23497	Nuclear autoantigen Sp-100	SP100	23.1	100.42	85.618	59	14	12	10	7	11	9	12	10	12	12	12	12	13	10	11	11	11	11	11	9	998960000	994450000	974700000	984770000	1098500000	1189100000	0.96	0.956	0.937	0.947	1.056	1.143	1.031	6.97E-01
P23526	Adenosylhomocysteinase	AHCY	51.6	47.716	97.796	239	22	22	40	42	38	43	37	39	22	22	22	22	22	21	22	22	22	22	22	21	11743000000	11723000000	11800000000	12138000000	11221000000	12328000000	0.993	0.991	0.998	1.026	0.949	1.042	1.041	1.38E-01
P23528	Cofilin-1	CFL1	78.9	18.502	178.18	150	15	11	23	25	26	24	28	24	14	14	14	14	15	14	10	10	10	10	11	10	18356000000	21291000000	18244000000	19427000000	17758000000	21628000000	0.944	1.095	0.938	0.999	0.913	1.112	1.147	1.98E-02
P23588	Eukaryotic translation initiation factor 4B	EIF4B	30.6	69.15	112.72	116	15	15	19	19	20	19	22	17	13	15	14	14	13	14	13	15	14	14	13	14	1092300000	1383100000	1206200000	1383500000	1159200000	1367600000	0.863	1.093	0.953	1.093	0.916	1.081	1.196	2.13E-02
P23743	Diacylglycerol kinase alpha	DGKA	11.7	82.629	19.347	25	7	7	3	4	3	3	7	5	5	6	4	5	7	6	5	6	4	5	7	6	103250000	139520000	116150000	126960000	107280000	115990000	0.874	1.18	0.983	1.074	0.908	0.981	1.171	7.55E-02
P23786	Carnitine O-palmitoyltransferase 2, mitochondrial	CPT2	38.3	73.776	74.518	143	20	20	23	25	21	27	21	26	19	20	19	20	20	19	19	20	19	20	20	19	1580500000	1318900000	1475000000	1413600000	1452300000	1410300000	1.096	0.915	1.023	0.98	1.007	0.978	0.919	7.26E-02
P23919	Thymidylate kinase	DTYMK	54.2	23.819	33.449	75	11	11	11	13	15	14	12	10	8	9	11	10	10	10	8	9	11	10	10	10	978620000	967640000	1002100000	994110000	1025300000	950370000	0.992	0.981	1.016	1.008	1.039	0.964	0.969	1.66E-01
P23921	Ribonucleoside-diphosphate reductase large subunit	RRM1	48.5	90.069	135.65	164	28	28	27	27	26	30	27	27	26	26	27	28	24	25	26	26	27	28	24	25	1468100000	1440500000	1333500000	1457100000	1421400000	1573200000	1.013	0.994	0.92	1.006	0.981	1.086	1.059	2.24E-01
P24390	ER lumen protein-retaining receptor 1	KDELR1	17.9	24.542	6.7527	11	3	3	2	1	2	2	3	1	3	2	3	3	2	3	3	2	3	3	2	3	186520000	128880000	212330000	132900000	186220000	140470000	1.133	0.783	1.29	0.808	1.132	0.854	0.688	2.80E-03
P24468	COUP transcription factor 2	NR2F2	31.4	45.571	76.549	47	11	9	12	7	7	5	10	6	11	10	10	8	9	9	9	8	8	7	8	8	505450000	325010000	492660000	309530000	466720000	317860000	1.255	0.807	1.223	0.768	1.158	0.789	0.65	1.56E-04
P24534	Elongation factor 1-beta	EEF1B2	67.6	24.763	55.859	73	11	8	9	10	10	13	17	14	10	10	9	10	10	10	7	7	6	7	7	7	2217400000	2699600000	2250700000	2874600000	2824000000	3609700000	0.808	0.983	0.82	1.047	1.028	1.315	1.259	1.38E-01
P24539	ATP synthase F(0) complex subunit B1, mitochondrial	ATP5F1	47.3	28.908	243.91	117	12	12	22	21	20	18	18	18	12	11	12	10	12	10	12	11	12	10	12	10	6424600000	5427900000	5531800000	5364000000	6466500000	5871000000	1.099	0.928	0.946	0.917	1.106	1.004	0.904	1.63E-01
P24666	Low molecular weight phosphotyrosine protein phosphatase	ACP1	58.2	18.042	50.785	40	6	6	7	8	7	5	6	7	5	5	6	5	5	5	5	5	6	5	5	5	609050000	687290000	641040000	598940000	608130000	644440000	0.964	1.088	1.015	0.948	0.963	1.021	1.039	4.33E-01
P24752	Acetyl-CoA acetyltransferase, mitochondrial	ACAT1	52.7	45.199	143.95	242	19	19	37	44	34	43	37	47	17	18	18	16	17	17	17	18	18	16	17	17	11692000000	11331000000	11479000000	11039000000	11332000000	11428000000	1.027	0.995	1.008	0.97	0.995	1.004	0.98	2.08E-01
P24863	Cyclin-C	CCNC	9.5	33.242	2.1972	5	3	3	1	0	2	1	1	0	2	2	2	2	2	2	2	2	2	2	2	2	47002000	43100000	57512000	0	50173000	44540000	0.97	0.889	1.187		1.035	0.919	0.85	1.52E-01
P24928	DNA-directed RNA polymerase II subunit RPB1	POLR2A	33.9	217.17	262.14	268	48	48	44	48	39	48	43	46	42	42	43	45	41	41	42	42	43	45	41	41	1971500000	1986700000	2085500000	2114200000	1981800000	2166000000	0.961	0.969	1.017	1.031	0.966	1.056	1.038	3.04E-01
P24941	Cyclin-dependent kinase 2	CDK2	32.6	33.929	18.5	25	8	6	5	3	4	5	5	3	7	6	7	6	7	6	5	4	5	4	5	4	248830000	199310000	210720000	237450000	218820000	246570000	1.096	0.878	0.928	1.046	0.964	1.086	1.007	9.33E-01
P25054	Adenomatous polyposis coli protein	APC	1.5	311.64	21.074	9	2	2	2	2	1	2	0	2	2	2	2	2	0	2	2	2	2	2	0	2	32961000	26006000	42144000	35850000	0	40624000	0.928	0.732	1.187	1.009		1.144	0.91	6.39E-01
P25116	Proteinase-activated receptor 1	F2R	7.5	47.44	11.686	10	2	2	2	2	1	1	3	1	2	2	2	2	2	2	2	2	2	2	2	2	79244000	50639000	91413000	43368000	82425000	45321000	1.212	0.774	1.398	0.663	1.26	0.693	0.551	8.63E-04
P25205	DNA replication licensing factor MCM3	MCM3	62.5	90.98	299.88	349	44	44	60	60	55	60	56	58	42	41	43	38	42	41	42	41	43	38	42	41	6742900000	6308300000	6881000000	5890300000	6908500000	6206800000	1.039	0.972	1.06	0.908	1.065	0.956	0.896	6.44E-03
P25325	3-mercaptopyruvate sulfurtransferase	MPST	38.4	33.178	44.713	45	9	9	8	8	8	8	7	6	6	8	8	7	6	8	6	8	8	7	6	8	313130000	348140000	301530000	329050000	317120000	348410000	0.96	1.067	0.924	1.009	0.972	1.068	1.101	1.69E-02
P25398	40S ribosomal protein S12	RPS12	70.5	14.515	68.831	215	8	8	33	43	30	45	27	37	8	8	8	8	8	8	8	8	8	8	8	8	8582800000	10195000000	8475000000	10112000000	8682400000	9764600000	0.923	1.096	0.911	1.087	0.933	1.05	1.168	5.64E-04
P25440	Bromodomain-containing protein 2	BRD2	13	88.06	63.509	17	8	6	1	4	3	5	1	3	5	6	6	6	4	5	4	5	5	5	3	3	36245000	57331000	39652000	45153000	37411000	60831000	0.786	1.244	0.86	0.979	0.811	1.319	1.441	2.65E-02
P25445	Tumor necrosis factor receptor superfamily member 6	FAS	34	37.732	50.473	37	9	9	7	4	6	6	8	6	8	6	9	8	8	7	8	6	9	8	8	7	204080000	211740000	192210000	179290000	210860000	168640000	1.049	1.089	0.988	0.922	1.084	0.867	0.922	3.23E-01
P25490	Transcriptional repressor protein YY1	YY1	31.9	44.712	33.48	35	11	11	6	6	6	5	7	5	9	10	8	8	8	9	9	10	8	8	8	9	268720000	255770000	262850000	247020000	293170000	279850000	1.003	0.955	0.981	0.922	1.094	1.045	0.949	3.58E-01
P25685	DnaJ homolog subfamily B member 1	DNAJB1	30.3	38.044	25.228	62	11	10	8	9	11	12	10	12	9	11	11	10	10	11	8	10	10	9	9	10	714780000	776800000	702400000	767440000	714030000	774010000	0.964	1.047	0.947	1.035	0.963	1.044	1.088	2.18E-04
P25705	ATP synthase subunit alpha, mitochondrial	ATP5A1	63.5	59.75	323.31	430	32	32	69	74	68	75	72	72	30	30	32	30	31	31	30	30	32	30	31	31	35204000000	33477000000	34469000000	35591000000	37290000000	33535000000	1.008	0.958	0.987	1.019	1.068	0.96	0.959	2.55E-01
P25786	Proteasome subunit alpha type-1	PSMA1	67.3	29.555	51.59	107	14	14	20	18	16	18	18	17	14	14	12	13	13	13	14	14	12	13	13	13	2469900000	2686100000	2627900000	2636100000	2612300000	3139600000	0.916	0.997	0.975	0.978	0.969	1.165	1.097	2.10E-01
P25787	Proteasome subunit alpha type-2	PSMA2	48.7	25.898	64.726	94	8	8	14	18	15	18	12	17	6	8	7	8	7	8	6	8	7	8	7	8	1590500000	1558600000	1508500000	1616600000	1475700000	1649300000	1.015	0.995	0.963	1.032	0.942	1.053	1.055	1.26E-01
P25788	Proteasome subunit alpha type-3	PSMA3	41.6	28.433	42.765	66	11	11	11	11	11	11	11	11	9	10	11	11	11	11	9	10	11	11	11	11	1418600000	1406500000	1483500000	1419000000	1499000000	1493800000	0.976	0.968	1.021	0.976	1.031	1.028	0.981	4.99E-01
P25789	Proteasome subunit alpha type-4	PSMA4	62.5	29.483	97.973	103	11	11	17	15	16	18	20	17	11	10	11	9	11	10	11	10	11	9	11	10	2088900000	2222700000	2112100000	2391000000	2266500000	2299100000	0.937	0.997	0.947	1.072	1.016	1.031	1.069	1.15E-01
P26006	Integrin alpha-3	ITGA3	19.9	116.61	70.477	122	17	17	20	24	20	20	20	18	17	17	16	16	16	17	17	17	16	16	16	17	2091300000	1942500000	1998300000	1996600000	2116600000	1983800000	1.035	0.961	0.989	0.988	1.047	0.981	0.954	7.51E-02
P26038	Moesin	MSN	51.5	67.819	222.68	296	32	20	44	50	43	59	48	52	31	30	30	31	31	31	19	18	18	19	19	19	7789100000	9884800000	7868700000	9753200000	7645900000	10715000000	0.871	1.105	0.88	1.091	0.855	1.198	1.302	1.58E-03
P26045	Tyrosine-protein phosphatase non-receptor type 3	PTPN3	14	103.99	33.36	22	8	8	3	3	3	3	6	4	7	6	6	6	8	6	7	6	6	6	8	6	112090000	71623000	114770000	113310000	95331000	86497000	1.133	0.724	1.16	1.145	0.964	0.874	0.842	2.82E-01
P26196	Probable ATP-dependent RNA helicase DDX6	DDX6	53.2	54.416	157.78	147	18	18	23	24	26	23	27	24	17	17	17	16	17	16	17	17	17	16	17	16	2013200000	2200400000	1874400000	2122300000	2117900000	2428900000	0.947	1.035	0.882	0.998	0.996	1.142	1.124	9.85E-02
P26358	DNA (cytosine-5)-methyltransferase 1	DNMT1	29.8	183.16	118.34	192	39	39	30	31	30	33	39	29	35	36	33	36	34	34	35	36	33	36	34	34	1452700000	1499500000	1466400000	1427600000	1368400000	1550300000	0.994	1.026	1.004	0.977	0.937	1.061	1.044	2.49E-01
P26368	Splicing factor U2AF 65 kDa subunit	U2AF2	50.1	53.5	115.07	136	16	16	21	26	22	24	20	23	16	16	16	15	16	16	16	16	16	15	16	16	4414500000	4666700000	4173100000	5372400000	4281000000	5227700000	0.941	0.995	0.89	1.146	0.913	1.115	1.186	2.42E-02
P26373	60S ribosomal protein L13	RPL13	34.6	24.261	67.779	83	7	7	15	14	13	15	12	14	7	7	7	7	7	7	7	7	7	7	7	7	7306900000	7807900000	7184800000	7827500000	7673400000	8069800000	0.956	1.021	0.94	1.024	1.004	1.056	1.069	3.87E-02
P26572	Alpha-1,3-mannosyl-glycoprotein 2-beta-N-acetylglucosaminyltransferase	MGAT1	40.2	50.878	108.88	69	13	13	12	10	11	14	11	11	13	12	13	12	10	12	13	12	13	12	10	12	706160000	677990000	691190000	655510000	731620000	644640000	1.032	0.99	1.01	0.958	1.069	0.942	0.929	3.07E-02
P26583	High mobility group protein B2	HMGB2	23.9	24.033	23.028	28	5	4	5	4	5	4	6	4	5	5	5	5	5	5	4	4	4	4	4	4	716380000	571150000	665450000	623980000	710990000	682190000	1.083	0.863	1.006	0.943	1.075	1.031	0.897	1.16E-01
P26599	Polypyrimidine tract-binding protein 1	PTBP1	64.4	57.221	296.15	296	20	18	61	48	47	51	45	44	20	20	20	20	20	20	18	18	18	18	18	18	10508000000	10701000000	11012000000	10754000000	11470000000	10778000000	0.967	0.984	1.013	0.989	1.055	0.991	0.977	4.61E-01
P26639	Threonine--tRNA ligase, cytoplasmic	TARS	54.2	83.434	110.1	167	32	32	22	29	29	34	24	29	29	28	30	30	28	28	29	28	30	30	28	28	2781700000	3117000000	3054900000	3131700000	2965600000	3186600000	0.915	1.025	1.005	1.03	0.976	1.048	1.072	6.42E-02
P26640	Valine--tRNA ligase	VARS	34	140.47	130.11	174	33	33	29	29	27	31	31	27	27	30	30	31	29	29	27	30	30	31	29	29	1491200000	1489200000	1411300000	1457500000	1454500000	1464300000	1.02	1.019	0.966	0.997	0.995	1.002	1.012	5.12E-01
P26641	Elongation factor 1-gamma	EEF1G	73.7	50.118	134.22	312	28	28	46	51	51	56	52	56	26	28	28	28	28	28	26	28	28	28	28	28	17365000000	17408000000	18055000000	18347000000	17445000000	18626000000	0.972	0.974	1.01	1.026	0.976	1.042	1.029	3.03E-01
P26885	Peptidyl-prolyl cis-trans isomerase FKBP2	FKBP2	62	15.649	26.916	39	6	6	8	8	5	6	6	6	6	5	6	6	5	6	6	5	6	6	5	6	1011300000	943020000	980240000	965430000	1016700000	933600000	1.037	0.967	1.005	0.99	1.043	0.957	0.945	1.99E-02
P27144	Adenylate kinase 4, mitochondrial	AK4	77.1	25.268	92.318	138	13	13	23	27	26	22	21	19	13	13	13	12	11	12	13	13	13	12	11	12	3721500000	3166600000	3666800000	3404600000	3609400000	3352900000	1.067	0.908	1.052	0.976	1.035	0.962	0.902	1.07E-02
P27348	14-3-3 protein theta	YWHAQ	56.7	27.764	182.81	164	16	11	24	29	27	29	28	27	16	16	16	15	16	15	11	11	11	10	11	10	7436900000	10317000000	7415200000	9740800000	8241400000	8890900000	0.857	1.189	0.855	1.123	0.95	1.025	1.254	1.70E-02
P27361	Mitogen-activated protein kinase 3	MAPK3	27.7	43.135	12.745	23	9	5	4	3	5	4	3	4	9	7	9	9	8	8	5	3	5	5	4	4	118270000	152600000	100260000	149410000	121650000	163590000	0.881	1.136	0.747	1.113	0.906	1.218	1.369	6.14E-03
P27448	MAP/microtubule affinity-regulating kinase 3	MARK3	25	84.488	73.072	40	14	9	6	6	9	7	7	5	13	11	13	11	14	12	8	7	9	7	9	7	168740000	145800000	149670000	154230000	169720000	155600000	1.073	0.927	0.952	0.981	1.079	0.989	0.933	2.07E-01
P27635	60S ribosomal protein L10	RPL10	42.5	24.604	73.626	101	8	5	15	18	14	23	11	20	8	8	8	8	7	8	5	5	5	5	4	5	4673500000	5024300000	4925600000	5542600000	4834900000	5576100000	0.917	0.986	0.967	1.088	0.949	1.094	1.118	4.20E-02
P27694	Replication protein A 70 kDa DNA-binding subunit	RPA1	40.1	68.137	163.77	104	20	20	16	18	16	18	19	17	16	17	17	18	17	17	16	17	17	18	17	17	1093700000	914900000	1154300000	929140000	1124300000	976080000	1.06	0.886	1.118	0.9	1.089	0.946	0.836	1.94E-03
P27695	DNA-(apurinic or apyrimidinic site) lyase	APEX1	52.8	35.554	57.158	74	11	11	15	11	12	14	11	11	10	10	10	9	10	10	10	10	10	9	10	10	858170000	812430000	891650000	835240000	852950000	791330000	1.021	0.967	1.061	0.994	1.015	0.942	0.937	3.58E-02
P27701	CD82 antigen	CD82	22.5	29.625	19.542	31	5	5	5	5	5	5	6	5	5	5	5	5	5	4	5	5	5	5	5	4	458100000	427390000	422750000	350630000	443020000	364060000	1.115	1.04	1.029	0.853	1.078	0.886	0.863	7.85E-02
P27707	Deoxycytidine kinase	DCK	34.6	30.518	37.83	25	7	7	5	4	3	5	3	5	6	6	5	5	5	6	6	6	5	5	5	6	100840000	136780000	99254000	127730000	97871000	121580000	0.884	1.2	0.871	1.12	0.858	1.066	1.296	2.84E-03
P27708	CAD protein	CAD	38.2	242.98	323.31	308	58	58	45	55	47	55	49	57	54	52	52	53	51	51	54	52	52	53	51	51	2949600000	3289800000	3105600000	3291700000	3077200000	3050900000	0.943	1.052	0.993	1.053	0.984	0.976	1.055	1.48E-01
P27797	Calreticulin	CALR	71	48.141	225.07	406	24	24	70	74	64	67	66	65	23	24	22	23	22	23	23	24	22	23	22	23	21300000000	20115000000	21768000000	19881000000	20978000000	20022000000	1.03	0.973	1.053	0.961	1.015	0.968	0.937	4.96E-03
P27816	Microtubule-associated protein 4	MAP4	46.6	121	206.75	269	40	40	44	49	39	50	45	42	34	38	35	39	36	38	34	38	35	39	36	38	3210000000	4001600000	3486200000	3562400000	3326200000	3830500000	0.899	1.121	0.977	0.998	0.932	1.073	1.137	3.87E-02
P27824	Calnexin	CANX	48.3	67.567	217.54	401	31	31	67	72	63	66	68	65	30	31	29	31	31	29	30	31	29	31	31	29	35878000000	30826000000	37033000000	33433000000	35370000000	31813000000	1.053	0.905	1.087	0.982	1.038	0.934	0.887	1.09E-02
P28066	Proteasome subunit alpha type-5	PSMA5	59.8	26.411	101.16	100	10	10	16	16	15	17	19	17	10	10	10	10	10	10	10	10	10	10	10	10	2308300000	2301500000	2281400000	2387700000	2335100000	2622000000	0.973	0.97	0.962	1.006	0.984	1.105	1.056	2.55E-01
P28070	Proteasome subunit beta type-4	PSMB4	48.5	29.204	54.087	82	8	8	10	16	13	13	16	14	8	8	8	8	8	8	8	8	8	8	8	8	756490000	967910000	809610000	797370000	778930000	865200000	0.912	1.167	0.976	0.962	0.939	1.043	1.122	1.41E-01
P28072	Proteasome subunit beta type-6	PSMB6	28	25.357	20.122	25	4	4	3	4	6	2	6	4	3	3	4	3	4	2	3	3	4	3	4	2	1372400000	1100500000	1384900000	1153700000	1211700000	1122500000	1.121	0.899	1.131	0.942	0.99	0.917	0.851	2.70E-02
P28074	Proteasome subunit beta type-5	PSMB5	62.7	28.48	104.08	79	13	13	9	14	13	18	10	15	9	10	9	12	9	11	9	10	9	12	9	11	1342300000	1555600000	1396700000	1306300000	1362700000	1268300000	0.978	1.134	1.018	0.952	0.993	0.924	1.007	9.22E-01
P28288	ATP-binding cassette sub-family D member 3	ABCD3	32.3	75.475	89.041	90	18	18	21	11	16	14	16	12	17	15	16	16	16	15	17	15	16	16	16	15	1258400000	1225800000	1217800000	1166700000	1244900000	1124100000	1.043	1.016	1.01	0.967	1.032	0.932	0.945	9.88E-02
P28290	Sperm-specific antigen 2	SSFA2	20.1	138.38	83.282	57	19	19	7	9	11	9	10	11	13	14	15	15	17	15	13	14	15	15	17	15	376400000	342800000	340770000	310640000	361620000	340250000	1.09	0.992	0.987	0.899	1.047	0.985	0.921	1.24E-01
P28331	NADH-ubiquinone oxidoreductase 75 kDa subunit, mitochondrial	NDUFS1	62.9	79.467	171.26	222	31	31	37	36	40	36	37	36	30	27	29	28	30	28	30	27	29	28	30	28	2973000000	2489800000	2960100000	2491500000	2995200000	2499300000	1.087	0.91	1.082	0.911	1.095	0.914	0.838	7.12E-07
P28340	DNA polymerase delta catalytic subunit	POLD1	24.4	123.63	71.542	61	19	19	8	9	11	10	12	11	13	14	15	13	14	15	13	14	15	13	14	15	314480000	339640000	333370000	324610000	347540000	310270000	0.958	1.034	1.015	0.989	1.059	0.945	0.979	6.15E-01
P28347	Transcriptional enhancer factor TEF-1	TEAD1	12	47.945	6.067	14	5	5	4	2	2	2	2	2	5	4	3	4	5	4	5	4	3	4	5	4	91281000	75635000	84114000	82591000	104020000	93769000	1.031	0.854	0.95	0.933	1.174	1.059	0.902	3.10E-01
P28370	Probable global transcription activator SNF2L1	SMARCA1	18.8	122.6	9.8144	16	21	8	1	2	4	2	4	3	19	17	19	17	18	15	7	5	7	6	7	6	115150000	117070000	128400000	117000000	116710000	124590000	0.961	0.977	1.072	0.976	0.974	1.04	0.996	9.18E-01
P28482	Mitogen-activated protein kinase 1	MAPK1	55	41.389	66.231	127	15	11	19	24	17	23	21	23	13	14	14	13	15	15	9	10	10	9	11	11	1477900000	1712400000	1460900000	1594200000	1455400000	1596000000	0.954	1.105	0.943	1.029	0.939	1.03	1.116	1.29E-02
P28799	Granulins	GRN	16.5	63.544	21.834	36	8	8	7	7	5	5	8	4	7	7	6	7	8	6	7	7	6	7	8	6	224380000	184120000	223210000	212760000	191870000	208730000	1.081	0.887	1.076	1.025	0.925	1.006	0.947	4.63E-01
P28838	Cytosol aminopeptidase	LAP3	58	56.166	127.11	165	23	23	25	27	26	32	28	27	22	21	22	21	21	21	22	21	22	21	21	21	2176700000	1875800000	2051100000	1994500000	2194200000	1937500000	1.068	0.92	1.006	0.979	1.076	0.951	0.904	2.24E-02
P29034	Protein S100-A2	S100A2	18.4	11.117	4.1214	16	2	2	3	2	2	3	3	3	2	2	2	2	2	2	2	2	2	2	2	2	270220000	418880000	260160000	382220000	257280000	435900000	0.801	1.241	0.771	1.133	0.762	1.292	1.57	7.81E-04
P29084	Transcription initiation factor IIE subunit beta	GTF2E2	30.2	33.043	37.779	31	6	6	5	7	4	6	4	5	5	5	6	6	6	6	5	5	6	6	6	6	132000000	136140000	94259000	111070000	90972000	105800000	1.182	1.219	0.844	0.994	0.814	0.947	1.113	5.01E-01
P29144	Tripeptidyl-peptidase 2	TPP2	42	138.35	150.18	172	38	38	25	32	35	26	27	27	29	32	34	32	33	33	29	32	34	32	33	33	1813100000	1870700000	1675800000	1884300000	1757900000	1811900000	1.006	1.038	0.93	1.046	0.975	1.005	1.061	7.96E-02
P29218	Inositol monophosphatase 1	IMPA1	29.6	30.188	16.908	23	6	6	4	4	3	5	3	4	5	6	5	6	5	4	5	6	5	6	5	4	96220000	110120000	132460000	115390000	102710000	116070000	0.858	0.982	1.181	1.029	0.916	1.035	1.031	7.79E-01
P29317	Ephrin type-A receptor 2	EPHA2	46.2	108.27	169.22	170	29	28	35	25	30	22	29	29	28	27	28	24	28	26	27	26	27	23	27	25	2160200000	1696600000	2233300000	1818400000	2290900000	1908500000	1.07	0.841	1.107	0.901	1.135	0.946	0.811	4.32E-03
P29323	Ephrin type-B receptor 2	EPHB2	11.4	117.49	63.301	38	8	6	7	5	7	5	7	7	8	8	8	8	8	8	6	6	6	6	6	6	144780000	142490000	152970000	155570000	159380000	156430000	0.953	0.938	1.007	1.024	1.049	1.03	0.994	8.94E-01
P29350	Tyrosine-protein phosphatase non-receptor type 6	PTPN6	9.6	67.56	14.283	20	4	4	4	3	3	4	3	3	4	3	4	4	3	4	4	3	4	4	3	4	85295000	69667000	74502000	70084000	70681000	89510000	1.113	0.909	0.972	0.915	0.922	1.168	0.995	9.61E-01
P29353	SHC-transforming protein 1	SHC1	23.2	62.821	45.075	33	9	9	4	8	5	6	6	4	7	8	6	8	8	6	7	8	6	8	8	6	162170000	156060000	173710000	158100000	150350000	191650000	0.981	0.944	1.051	0.956	0.909	1.159	1.04	6.51E-01
P29372	DNA-3-methyladenine glycosylase	MPG	13.1	32.868	6.4243	6	3	3	1	0	2	1	2	0	3	1	3	2	2	1	3	1	3	2	2	1	47462000	0	52573000	49370000	63794000	0	0.89		0.986	0.926	1.197		0.904
P29401	Transketolase	TKT	75.6	67.877	317.23	364	33	33	53	66	60	65	52	68	32	30	31	31	32	31	32	30	31	31	32	31	15450000000	17090000000	16816000000	16530000000	16470000000	18354000000	0.92	1.018	1.002	0.985	0.981	1.093	1.066	1.86E-01
P29590	Protein PML	PML	23.5	97.55	127.44	100	19	19	14	19	16	16	16	19	14	18	17	16	16	17	14	18	17	16	16	17	861240000	742490000	844080000	785850000	902710000	762140000	1.055	0.909	1.034	0.963	1.106	0.934	0.878	7.84E-03
P29692	Elongation factor 1-delta	EEF1D	69	31.121	321.42	208	18	15	28	43	31	38	29	39	17	17	17	17	18	17	14	14	14	14	15	14	8873000000	9040400000	8790500000	8692900000	8469900000	9034700000	1.006	1.025	0.997	0.986	0.961	1.025	1.024	2.77E-01
P29966	Myristoylated alanine-rich C-kinase substrate	MARCKS	42.5	31.554	119.4	85	8	8	9	19	15	16	15	11	8	7	8	7	8	7	8	7	8	7	8	7	2971600000	1917200000	3000900000	2102600000	2947500000	2169300000	1.18	0.761	1.192	0.835	1.17	0.861	0.694	2.96E-04
P29992	Guanine nucleotide-binding protein subunit alpha-11	GNA11	49	42.123	70.748	81	14	7	14	13	13	14	14	13	14	14	14	14	13	13	7	7	7	7	7	7	1432200000	1223900000	1508300000	1134200000	1481600000	1322700000	1.061	0.906	1.117	0.84	1.097	0.979	0.832	1.37E-02
P30038	Delta-1-pyrroline-5-carboxylate dehydrogenase, mitochondrial	ALDH4A1	25.8	61.719	65.345	51	10	10	9	7	6	5	10	14	10	10	8	9	10	10	10	10	8	9	10	10	374980000	338960000	419890000	361130000	365710000	340470000	1.022	0.924	1.145	0.984	0.997	0.928	0.897	9.28E-02
P30040	Endoplasmic reticulum resident protein 29	ERP29	56.7	28.993	59.175	97	12	12	13	17	20	20	12	15	10	11	12	11	9	11	10	11	12	11	9	11	2341400000	2604400000	2755500000	2371000000	2621700000	2503200000	0.924	1.028	1.088	0.936	1.035	0.988	0.969	5.97E-01
P30041	Peroxiredoxin-6	PRDX6	82.6	25.035	117.66	140	18	18	23	23	22	24	23	25	18	18	18	18	18	18	18	18	18	18	18	18	4601000000	5551000000	5026800000	5713300000	5050600000	5706600000	0.872	1.052	0.953	1.083	0.957	1.082	1.156	7.94E-03
P30042	ES1 protein homolog, mitochondrial	C21orf33	64.6	28.17	150.47	107	13	13	20	17	17	15	20	18	12	12	13	12	13	12	12	12	13	12	13	12	2067500000	2257400000	2259200000	1969200000	2236100000	2172400000	0.957	1.045	1.046	0.912	1.035	1.006	0.975	6.30E-01
P30043	Flavin reductase (NADPH)	BLVRB	56.3	22.119	53.014	56	8	8	9	6	9	12	9	11	8	7	6	7	6	7	8	7	6	7	6	7	523950000	536950000	446090000	496840000	394020000	542000000	1.069	1.096	0.91	1.014	0.804	1.106	1.155	1.55E-01
P30044	Peroxiredoxin-5, mitochondrial	PRDX5	55.1	22.086	91.009	72	8	8	12	12	13	12	12	11	8	8	8	8	8	8	8	8	8	8	8	8	1740500000	1944100000	1885100000	1987100000	1878000000	2097700000	0.906	1.011	0.981	1.034	0.977	1.091	1.095	5.59E-02
P30046	D-dopachrome decarboxylase	DDT	35.6	12.712	4.7554	10	5	5	2	2	0	3	1	2	4	5	5	3	4	3	4	5	5	3	4	3	229550000	205190000	183920000	264870000	178140000	281150000	1.026	0.917	0.822	1.183	0.796	1.256	1.27	1.33E-01
P30048	Thioredoxin-dependent peroxide reductase, mitochondrial	PRDX3	54.7	27.692	112.69	166	10	10	28	28	28	24	28	30	10	10	10	10	10	10	10	10	10	10	10	10	16188000000	16660000000	15981000000	18232000000	14828000000	15760000000	0.995	1.024	0.982	1.12	0.911	0.968	1.078	2.19E-01
P30049	ATP synthase subunit delta, mitochondrial	ATP5D	58.3	17.49	59.167	61	5	5	10	11	8	9	11	12	5	5	4	5	5	5	5	5	4	5	5	5	1882400000	2176400000	2114400000	2448000000	2089300000	1929100000	0.894	1.033	1.004	1.162	0.992	0.916	1.077	4.03E-01
P30050	60S ribosomal protein L12	RPL12	67.9	17.818	78.454	98	9	9	13	22	16	18	13	16	8	8	7	9	8	9	8	8	7	9	8	9	12111000000	13024000000	10895000000	13473000000	12027000000	14736000000	0.953	1.025	0.857	1.06	0.946	1.159	1.177	3.28E-02
P30084	Enoyl-CoA hydratase, mitochondrial	ECHS1	52.1	31.387	125.53	157	15	15	26	26	28	23	26	28	14	13	15	13	13	15	14	13	15	13	13	15	5360600000	4861000000	5125200000	5101800000	4832600000	5258200000	1.053	0.955	1.007	1.002	0.949	1.033	0.994	8.74E-01
P30085	UMP-CMP kinase	CMPK1	39.8	22.222	49.067	61	9	9	8	11	10	12	8	12	8	8	9	9	8	8	8	8	9	9	8	8	406260000	452230000	411980000	488440000	358100000	476140000	0.94	1.046	0.953	1.13	0.829	1.102	1.204	1.64E-02
P30086	Phosphatidylethanolamine-binding protein 1	PEBP1	79.1	21.057	67.803	83	10	10	15	14	12	11	16	15	10	10	9	9	10	9	10	10	9	9	10	9	1116100000	1165200000	1231000000	1313400000	1236200000	1381600000	0.9	0.939	0.992	1.059	0.996	1.114	1.077	2.86E-01
P30101	Protein disulfide-isomerase A3	PDIA3	62.2	56.782	300.6	415	30	30	59	69	73	72	68	74	29	27	29	26	29	28	29	27	29	26	29	28	27748000000	24468000000	27812000000	25817000000	28592000000	26326000000	1.036	0.913	1.038	0.964	1.067	0.983	0.91	1.52E-02
P30153	Serine/threonine-protein phosphatase 2A 65 kDa regulatory subunit A alpha isoform	PPP2R1A	55.2	65.308	191.36	214	26	20	33	39	33	37	34	38	25	25	25	25	26	25	19	19	19	19	20	19	4420100000	4615700000	4495700000	4925600000	4058600000	5047900000	0.962	1.005	0.979	1.072	0.883	1.099	1.124	4.46E-02
P30154	Serine/threonine-protein phosphatase 2A 65 kDa regulatory subunit A beta isoform	PPP2R1B	36.6	66.213	52.497	50	16	10	6	11	6	9	8	10	16	15	15	16	15	16	10	9	9	10	9	10	259470000	227080000	235990000	252570000	234940000	235350000	1.077	0.943	0.98	1.048	0.975	0.977	0.979	6.64E-01
P30260	Cell division cycle protein 27 homolog	CDC27	27.1	91.866	57.012	86	16	16	16	13	16	15	12	14	14	15	15	14	13	16	14	15	15	14	13	16	580200000	594400000	660680000	645950000	664380000	572610000	0.936	0.959	1.066	1.042	1.072	0.924	0.952	4.29E-01
P30405	Peptidyl-prolyl cis-trans isomerase F, mitochondrial	PPIF	61.4	22.04	112.47	107	12	10	18	19	19	17	16	18	11	12	11	12	11	11	9	10	9	10	9	9	3595600000	2757800000	3536800000	3112900000	3698300000	3198500000	1.084	0.832	1.066	0.939	1.115	0.964	0.837	1.48E-02
P30408	Transmembrane 4 L6 family member 1	TM4SF1	4.5	21.632	3.5024	13	1	1	2	2	2	2	2	3	1	1	1	1	1	1	1	1	1	1	1	1	165450000	93628000	127120000	99103000	208830000	102990000	1.245	0.705	0.957	0.746	1.572	0.775	0.59	1.02E-01
P30419	Glycylpeptide N-tetradecanoyltransferase 1	NMT1	44.6	56.806	64.972	75	15	11	9	12	13	13	13	15	10	14	13	14	11	14	7	10	9	10	8	10	677760000	824650000	706570000	926960000	772110000	867960000	0.851	1.036	0.888	1.165	0.97	1.09	1.215	1.93E-02
P30453	HLA class I histocompatibility antigen, A-34 alpha chain	HLA-A	50.7	41.054	61.134	45	14	3	10	7	8	4	9	7	12	11	12	12	13	11	2	2	2	2	3	2	350170000	381400000	354160000	373650000	443570000	437410000	0.898	0.978	0.908	0.958	1.137	1.121	1.039	7.05E-01
P30508	HLA class I histocompatibility antigen, Cw-12 alpha chain	HLA-C	51.4	40.885	72.008	51	14	0	8	9	9	8	9	8	13	14	14	13	12	12	0	0	0	0	0	0	324160000	331820000	390280000	328030000	376260000	388280000	0.909	0.931	1.095	0.92	1.056	1.089	0.961	6.39E-01
P30511	HLA class I histocompatibility antigen, alpha chain F	HLA-F	10.7	39.061	4.4122	2	3	2	0	1	0	0	1	0	3	3	3	1	3	2	2	2	2	0	2	1	0	24164000	0	0	36446000	0		0.797			1.203		0.663
P30519	Heme oxygenase 2	HMOX2	64.9	36.032	144.43	164	17	17	30	25	29	26	27	27	16	16	17	16	17	15	16	16	17	16	17	15	4610000000	4042400000	4286400000	4653000000	4817000000	4090100000	1.044	0.915	0.971	1.054	1.091	0.926	0.932	2.83E-01
P30520	Adenylosuccinate synthetase isozyme 2	ADSS	23.9	50.097	46.887	65	9	9	11	11	10	11	11	11	9	9	9	9	9	9	9	9	9	9	9	9	571970000	582250000	549450000	678080000	585490000	651050000	0.948	0.966	0.911	1.124	0.971	1.08	1.12	8.84E-02
P30530	Tyrosine-protein kinase receptor UFO	AXL	41.8	98.335	180.13	179	26	26	31	31	32	26	31	28	23	24	23	22	24	21	23	24	23	22	24	21	2551600000	2097400000	2372200000	2040700000	2290700000	1964500000	1.15	0.945	1.069	0.919	1.032	0.885	0.846	1.26E-02
P30533	Alpha-2-macroglobulin receptor-associated protein	LRPAP1	28.9	41.465	31.935	45	10	10	8	6	8	7	10	6	9	8	10	8	10	8	9	8	10	8	10	8	328860000	237600000	333440000	249500000	398940000	309650000	1.062	0.767	1.077	0.806	1.288	1	0.751	5.01E-02
P30536	Translocator protein	TSPO	27.2	18.828	3.9917	18	4	4	3	3	3	4	2	3	3	4	4	3	4	4	3	4	4	3	4	4	303560000	263670000	385560000	262570000	354300000	298110000	0.975	0.847	1.239	0.843	1.138	0.958	0.79	5.16E-02
P30566	Adenylosuccinate lyase	ADSL	26.2	54.889	47.269	32	9	9	6	8	5	6	4	3	7	7	7	9	7	8	7	7	7	9	7	8	213690000	254120000	230140000	229410000	214210000	198470000	0.957	1.138	1.03	1.027	0.959	0.889	1.036	6.63E-01
P30622	CAP-Gly domain-containing linker protein 1	CLIP1	30.3	162.24	181.19	156	36	33	26	27	23	27	23	30	31	30	30	31	30	33	28	27	28	29	27	30	1032200000	1164900000	1035800000	1129800000	1077300000	1175400000	0.936	1.057	0.939	1.025	0.977	1.066	1.103	5.62E-03
P30626	Sorcin	SRI	60.6	21.676	21.198	42	10	10	7	7	5	7	7	9	9	10	10	10	10	10	9	10	10	10	10	10	874280000	1028200000	816300000	1086500000	774640000	1042000000	0.933	1.097	0.871	1.16	0.827	1.112	1.28	2.42E-03
P30679	Guanine nucleotide-binding protein subunit alpha-15	GNA15	28.9	43.568	31.328	36	9	9	8	6	10	2	7	3	9	8	9	6	8	6	9	8	9	6	8	6	231500000	163920000	211180000	188690000	249180000	166490000	1.147	0.812	1.046	0.935	1.235	0.825	0.75	1.30E-02
P30740	Leukocyte elastase inhibitor	SERPINB1	28.8	42.741	54.248	44	11	11	6	10	8	6	7	7	9	9	9	9	9	6	9	9	9	9	9	6	409940000	444670000	382280000	407810000	329550000	429710000	1.023	1.11	0.954	1.018	0.823	1.073	1.143	1.08E-01
P30825	High affinity cationic amino acid transporter 1	SLC7A1	11	67.638	17.322	46	7	7	9	6	8	8	8	7	7	6	6	7	7	6	7	6	6	7	7	6	635170000	507080000	621110000	553790000	635970000	632130000	1.063	0.849	1.039	0.927	1.064	1.058	0.895	2.13E-01
P30837	Aldehyde dehydrogenase X, mitochondrial	ALDH1B1	11	57.206	19.14	12	4	3	2	2	3	1	3	1	4	4	4	3	4	3	3	3	3	2	3	2	47841000	53897000	66896000	50915000	46421000	48948000	0.911	1.027	1.275	0.97	0.884	0.933	0.954	7.34E-01
P30876	DNA-directed RNA polymerase II subunit RPB2	POLR2B	46.6	133.9	175.89	190	43	43	28	28	36	31	30	37	38	35	39	33	37	37	38	35	39	33	37	37	1902200000	1996000000	2125600000	2069400000	1985900000	1997400000	0.945	0.992	1.056	1.028	0.987	0.992	1.008	8.25E-01
P31040	Succinate dehydrogenase [ubiquinone] flavoprotein subunit, mitochondrial	SDHA	62.3	72.691	312.35	329	29	29	50	56	57	54	55	57	29	28	29	28	29	28	29	28	29	28	29	28	9174000000	7113300000	8840600000	7142100000	8664500000	7370200000	1.14	0.884	1.098	0.887	1.076	0.915	0.811	5.82E-04
P31150	Rab GDP dissociation inhibitor alpha	GDI1	56.4	50.582	56.92	69	19	12	10	13	10	13	11	12	18	18	17	18	18	19	11	11	10	11	11	12	378200000	446250000	426220000	511740000	457520000	490680000	0.837	0.988	0.943	1.133	1.013	1.086	1.148	1.07E-01
P31153	S-adenosylmethionine synthase isoform type-2	MAT2A	49.4	43.66	104.35	86	14	14	16	12	15	13	16	14	14	12	12	12	12	11	14	12	12	12	12	11	1603200000	1607600000	1627600000	1696800000	1677200000	1813300000	0.959	0.962	0.974	1.015	1.004	1.085	1.043	3.32E-01
P31350	Ribonucleoside-diphosphate reductase subunit M2	RRM2	36	44.877	38.502	59	11	11	10	9	8	11	9	12	10	11	10	11	11	11	10	11	10	11	11	11	487640000	545040000	485240000	490010000	530500000	506300000	0.961	1.074	0.956	0.966	1.045	0.998	1.025	5.95E-01
P31431	Syndecan-4	SDC4	23.2	21.641	9.969	20	5	5	3	3	3	4	3	4	4	5	4	5	4	5	4	5	4	5	4	5	186300000	252010000	178960000	331620000	185700000	312940000	0.772	1.045	0.742	1.375	0.77	1.297	1.627	4.12E-02
P31483	Nucleolysin TIA-1 isoform p40	TIA1	29	42.963	30.396	20	8	5	4	3	2	2	6	3	6	7	6	7	8	6	3	4	3	4	5	3	61218000	88364000	74703000	77839000	62509000	69827000	0.845	1.22	1.032	1.075	0.863	0.964	1.189	1.42E-01
P31641	Sodium- and chloride-dependent taurine transporter	SLC6A6	4.2	69.829	4.1207	6	2	2	1	1	2	0	1	1	2	1	2	1	2	2	2	1	2	1	2	2	55947000	0	66325000	0	48863000	30555000	1.11		1.315		0.969	0.606	0.536
P31689	DnaJ homolog subfamily A member 1	DNAJA1	51.1	44.868	78.852	81	16	16	12	14	14	15	13	13	14	14	14	13	14	15	14	14	14	13	14	15	1341000000	1366300000	1335800000	1171900000	1467400000	1333000000	1.004	1.023	1	0.877	1.098	0.998	0.934	2.85E-01
P31751	RAC-beta serine/threonine-protein kinase	AKT2	9.8	55.768	14.87	13	3	2	4	1	3	1	3	1	2	3	2	2	2	1	1	2	1	1	1	0	34924000	57107000	34446000	60514000	30605000	52217000	0.777	1.27	0.766	1.346	0.681	1.161	1.699	1.10E-03
P31930	Cytochrome b-c1 complex subunit 1, mitochondrial	UQCRC1	57.5	52.645	204.24	236	20	19	40	40	37	39	39	41	19	19	19	19	20	19	18	18	18	18	19	18	10515000000	9209400000	10245000000	9993500000	10695000000	9162100000	1.055	0.924	1.028	1.002	1.073	0.919	0.902	2.64E-02
P31937	3-hydroxyisobutyrate dehydrogenase, mitochondrial	HIBADH	41.7	35.329	77.746	93	11	11	17	15	16	16	17	12	11	10	11	11	10	10	11	10	11	11	10	10	1768600000	1774100000	1944300000	1708500000	1899700000	1897100000	0.965	0.968	1.061	0.933	1.037	1.036	0.959	3.67E-01
P31939	Bifunctional purine biosynthesis protein PURH	ATIC	69.9	64.615	242.66	223	31	31	38	43	34	38	34	36	30	29	30	30	31	30	30	29	30	30	31	30	3684700000	4043200000	3457200000	4016300000	3321400000	3802300000	0.99	1.087	0.929	1.079	0.893	1.022	1.134	2.34E-02
P31942	Heterogeneous nuclear ribonucleoprotein H3	HNRNPH3	55.5	36.926	201.07	134	14	13	20	19	21	28	21	25	14	14	14	14	14	13	13	13	13	13	13	12	4365500000	4286400000	4381000000	3884900000	4481500000	4101600000	1.027	1.009	1.031	0.914	1.054	0.965	0.928	5.89E-02
P31943	Heterogeneous nuclear ribonucleoprotein H	HNRNPH1	61	49.229	274.08	422	20	12	58	76	74	63	79	72	20	20	19	19	20	20	12	12	11	12	12	12	20058000000	20507000000	18726000000	20699000000	21052000000	20931000000	0.987	1.009	0.921	1.018	1.036	1.03	1.038	3.25E-01
P31946	14-3-3 protein beta/alpha	YWHAB	64.6	28.082	119.73	84	13	7	16	14	14	12	15	13	13	13	13	13	13	13	7	7	7	7	7	7	3575200000	5345400000	3865500000	5790400000	3630200000	4648700000	0.799	1.194	0.864	1.294	0.811	1.039	1.426	1.03E-02
P31947	14-3-3 protein sigma	SFN	70.2	27.774	116.64	166	15	12	22	31	23	35	23	32	14	15	14	15	15	15	11	12	11	12	12	12	9636900000	14328000000	12268000000	14787000000	10822000000	14755000000	0.755	1.122	0.961	1.158	0.848	1.156	1.34	8.70E-03
P31948	Stress-induced-phosphoprotein 1	STIP1	52.9	62.639	104.88	243	31	31	43	37	38	43	41	41	29	29	29	30	29	28	29	29	29	30	29	28	7588100000	7616000000	7523400000	7554000000	7580600000	8257300000	0.987	0.991	0.979	0.983	0.986	1.074	1.032	3.91E-01
P31949	Protein S100-A11	S100A11	80	11.74	41.205	60	6	6	8	12	7	13	9	11	5	6	6	6	6	6	5	6	6	6	6	6	2099600000	3303600000	2174000000	3005000000	2145300000	3234100000	0.789	1.242	0.817	1.13	0.806	1.216	1.487	3.59E-04
P32004	Neural cell adhesion molecule L1	L1CAM	32.4	140	209.71	207	30	30	29	40	31	39	29	39	25	27	26	28	26	29	25	27	26	28	26	29	2812300000	4226400000	2713900000	4686400000	3019600000	4554300000	0.767	1.152	0.74	1.277	0.823	1.241	1.576	5.59E-04
P32119	Peroxiredoxin-2	PRDX2	53	21.892	41.74	65	10	9	12	11	10	7	11	14	10	10	9	10	9	10	9	9	8	9	8	9	3044000000	3200400000	2841400000	3343800000	2871900000	3565000000	0.968	1.018	0.904	1.063	0.913	1.134	1.154	2.17E-02
P32121	Beta-arrestin-2	ARRB2	12.2	46.105	12.578	13	4	4	1	2	2	3	4	1	2	3	3	3	3	2	2	3	3	3	3	2	0	53847000	52801000	46828000	56576000	44633000		1.057	1.037	0.919	1.111	0.876	0.886	2.03E-01
P32321	Deoxycytidylate deaminase	DCTD	20.8	20.016	16.403	14	3	3	2	3	1	4	2	2	2	2	2	3	3	2	2	2	2	3	3	2	61433000	85234000	73735000	132130000	78521000	90817000	0.706	0.98	0.848	1.519	0.903	1.044	1.442	1.14E-01
P32322	Pyrroline-5-carboxylate reductase 1, mitochondrial	PYCR1	43.6	33.36	41.748	55	9	8	9	13	6	8	13	6	9	9	8	8	9	9	8	8	7	7	8	8	419620000	403090000	333660000	339730000	371780000	373360000	1.123	1.079	0.893	0.909	0.995	1	0.992	9.28E-01
P32519	ETS-related transcription factor Elf-1	ELF1	17.6	67.497	29.845	21	7	7	5	3	3	4	4	2	5	4	3	4	4	5	5	4	3	4	4	5	96283000	127890000	133240000	134670000	112720000	118710000	0.798	1.061	1.105	1.117	0.935	0.984	1.114	3.27E-01
P32780	General transcription factor IIH subunit 1	GTF2H1	12.4	62.031	26.811	14	4	4	4	2	3	2	1	2	4	4	4	3	4	4	4	4	4	3	4	4	166720000	126950000	134000000	119830000	127710000	119150000	1.259	0.959	1.012	0.905	0.965	0.9	0.854	1.67E-01
P32926	Desmoglein-3	DSG3	26.3	107.53	99.486	87	20	20	13	17	11	19	11	16	18	18	20	17	17	16	18	18	20	17	17	16	560420000	812850000	615360000	791390000	610210000	888150000	0.786	1.14	0.863	1.11	0.856	1.246	1.396	2.32E-03
P32969	60S ribosomal protein L9	RPL9	65.6	21.863	146.63	200	11	11	32	37	28	35	31	37	11	11	11	11	11	11	11	11	11	11	11	11	5490500000	5785000000	5487300000	6254700000	5726100000	6034000000	0.947	0.998	0.947	1.079	0.988	1.041	1.082	4.38E-02
P33121	Long-chain-fatty-acid--CoA ligase 1	ACSL1	19.3	77.942	21.256	43	14	14	9	5	9	5	8	7	13	10	12	10	14	10	13	10	12	10	14	10	380410000	234410000	357070000	256960000	352950000	257960000	1.241	0.764	1.165	0.838	1.151	0.841	0.687	5.83E-04
P33176	Kinesin-1 heavy chain	KIF5B	58.4	109.68	323.31	302	48	41	44	55	44	60	46	53	45	43	42	43	43	43	38	36	36	36	36	37	3691100000	3717400000	3528300000	4173900000	3517800000	3960200000	0.98	0.987	0.937	1.109	0.934	1.052	1.104	6.06E-02
P33240	Cleavage stimulation factor subunit 2	CSTF2	48.2	60.959	105.37	125	19	14	20	20	18	25	19	23	16	17	18	19	18	18	11	12	13	14	13	13	2397200000	2504000000	2397100000	2470200000	2410700000	2470100000	0.982	1.026	0.982	1.012	0.987	1.012	1.033	2.78E-03
P33316	Deoxyuridine 5'-triphosphate nucleotidohydrolase, mitochondrial	DUT	46.4	26.563	70.891	88	10	10	14	16	15	15	14	14	10	10	10	10	10	10	10	10	10	10	10	10	1739400000	1780700000	1786900000	1762900000	1829700000	1869000000	0.969	0.992	0.996	0.982	1.019	1.041	1.011	6.76E-01
P33527	Multidrug resistance-associated protein 1	ABCC1	22.6	171.59	140.57	78	25	25	15	9	12	16	15	11	20	17	19	18	20	16	20	17	19	18	20	16	659180000	631170000	682380000	596900000	714090000	606520000	1.017	0.973	1.052	0.921	1.101	0.935	0.892	1.76E-02
P33981	Dual specificity protein kinase TTK	TTK	5.6	97.071	13.732	6	3	3	1	0	2	0	1	2	3	1	3	3	3	3	3	1	3	3	3	3	47789000	0	59393000	44259000	55258000	46753000	0.943		1.172	0.873	1.09	0.922	0.84	1.49E-01
P33991	DNA replication licensing factor MCM4	MCM4	54.6	96.557	242	277	43	43	49	45	52	45	46	40	39	34	40	35	40	36	39	34	40	35	40	36	4745900000	4490600000	4799000000	4260400000	4962600000	3927600000	1.047	0.991	1.059	0.94	1.095	0.867	0.874	2.57E-02
P33992	DNA replication licensing factor MCM5	MCM5	54.9	82.285	265.47	269	38	38	45	43	43	47	47	44	36	38	38	36	36	37	36	38	38	36	36	37	4583900000	4162300000	4716200000	4140500000	4803100000	4407100000	1.026	0.931	1.055	0.927	1.075	0.986	0.901	1.21E-02
P33993	DNA replication licensing factor MCM7	MCM7	57.7	81.307	234.23	292	39	39	52	45	49	50	51	45	37	36	39	38	39	37	37	36	39	38	39	37	4755400000	4108100000	4838800000	3987400000	4635700000	4082400000	1.08	0.933	1.099	0.906	1.053	0.928	0.856	5.98E-04
P34896	Serine hydroxymethyltransferase, cytosolic	SHMT1	28.8	53.082	25.704	25	11	10	5	2	5	4	4	5	9	9	10	10	9	10	8	8	9	9	8	9	329910000	276450000	289270000	288250000	288200000	303330000	1.115	0.934	0.978	0.974	0.974	1.025	0.957	4.53E-01
P34897	Serine hydroxymethyltransferase, mitochondrial	SHMT2	69	55.992	252.15	293	25	24	46	54	46	46	50	51	23	25	25	25	24	25	22	24	24	24	23	24	10968000000	10343000000	10928000000	10874000000	11139000000	9610600000	1.03	0.972	1.027	1.022	1.047	0.903	0.933	1.19E-01
P34932	Heat shock 70 kDa protein 4	HSPA4	66.5	94.33	288.72	361	46	45	59	56	61	63	61	61	42	42	44	43	45	45	41	41	43	42	44	44	6832000000	7097700000	6726200000	6980400000	6757200000	7182600000	0.986	1.024	0.971	1.007	0.975	1.037	1.047	9.04E-03
P35052	Glypican-1	GPC1	45.3	61.68	78.402	111	18	18	18	22	16	21	14	20	17	16	15	15	15	15	17	16	15	15	15	15	742360000	1129000000	743600000	1107700000	815170000	1129900000	0.786	1.195	0.787	1.173	0.863	1.196	1.463	1.43E-04
P35221	Catenin alpha-1	CTNNA1	73.2	100.07	323.31	507	52	40	82	82	78	95	84	86	52	50	51	51	51	51	40	38	39	39	39	39	21005000000	19898000000	21239000000	19864000000	20557000000	19440000000	1.033	0.979	1.045	0.977	1.011	0.956	0.943	8.48E-03
P35222	Catenin beta-1	CTNNB1	62.5	85.496	323.31	382	38	34	67	66	59	63	60	67	35	36	37	37	37	37	31	32	33	33	33	33	8339300000	7503700000	8379200000	6965900000	8597000000	7280000000	1.063	0.957	1.068	0.888	1.096	0.928	0.859	2.48E-03
P35226	Polycomb complex protein BMI-1	BMI1	3.4	36.949	2.0297	8	1	1	2	1	1	1	1	2	1	1	1	1	1	1	1	1	1	1	1	1	75799000	46473000	58296000	58767000	62369000	73632000	1.212	0.743	0.932	0.939	0.997	1.177	0.91	5.69E-01
P35232	Prohibitin	PHB	85.3	29.804	243.28	261	22	22	42	48	40	47	42	42	22	22	22	22	21	21	22	22	22	22	21	21	22314000000	22878000000	22683000000	22798000000	22244000000	22703000000	0.987	1.012	1.004	1.009	0.984	1.004	1.017	5.93E-02
P35237	Serpin B6	SERPINB6	12.2	42.621	10.499	20	5	5	2	3	3	4	4	4	5	4	4	5	4	4	5	4	4	5	4	4	68261000	82336000	67889000	89450000	89042000	85302000	0.849	1.024	0.845	1.113	1.108	1.061	1.142	2.18E-01
P35241	Radixin	RDX	54	68.563	147.06	125	31	16	16	24	21	22	19	23	30	29	30	29	31	29	15	14	15	14	16	14	1698800000	1865300000	1768800000	1708300000	1723900000	1852400000	0.96	1.054	1	0.965	0.974	1.047	1.045	2.24E-01
P35244	Replication protein A 14 kDa subunit	RPA3	43.8	13.569	13.184	32	4	4	4	5	5	6	5	7	4	4	4	4	4	4	4	4	4	4	4	4	377240000	286950000	360840000	270470000	389540000	330860000	1.123	0.854	1.074	0.805	1.159	0.985	0.788	1.59E-02
P35249	Replication factor C subunit 4	RFC4	57.3	39.681	74.59	90	17	17	17	14	15	14	15	15	17	16	17	17	17	17	17	16	17	17	17	17	1301200000	1257300000	1342100000	1309000000	1319800000	1300400000	0.997	0.963	1.028	1.003	1.011	0.997	0.976	1.81E-01
P35250	Replication factor C subunit 2	RFC2	44.9	39.157	113.96	102	14	14	20	15	17	16	17	17	14	12	12	14	14	13	14	12	12	14	14	13	1087700000	1061800000	1025000000	1093300000	972190000	1068700000	1.034	1.01	0.975	1.04	0.925	1.016	1.045	2.53E-01
P35251	Replication factor C subunit 1	RFC1	24	128.25	123.84	100	22	22	19	19	16	14	15	17	20	19	19	19	19	20	20	19	19	19	19	20	716380000	700620000	674670000	670450000	591970000	626380000	1.08	1.056	1.017	1.011	0.892	0.944	1.007	9.15E-01
P35268	60S ribosomal protein L22	RPL22	39.1	14.787	46.809	26	3	3	3	6	3	4	4	6	3	3	3	3	3	3	3	3	3	3	3	3	2564500000	4399800000	2436800000	3963500000	2109300000	3789000000	0.799	1.37	0.759	1.235	0.657	1.18	1.709	1.76E-03
P35269	General transcription factor IIF subunit 1	GTF2F1	30.8	58.24	115.36	70	12	12	8	14	13	12	9	14	10	12	11	12	10	12	10	12	11	12	10	12	487460000	497300000	480330000	485270000	491650000	520350000	0.987	1.007	0.973	0.983	0.996	1.054	1.03	2.51E-01
P35573	Glycogen debranching enzyme	AGL	9	174.76	24.645	19	11	11	3	4	3	4	2	3	8	9	9	9	8	8	8	9	9	9	8	8	178240000	187300000	190520000	157420000	178890000	150610000	1.025	1.077	1.096	0.906	1.029	0.866	0.904	2.18E-01
P35579	Myosin-9	MYH9	53	226.53	323.31	955	100	78	148	167	144	169	151	176	97	95	94	98	94	97	76	75	74	77	74	76	23787000000	31661000000	23686000000	31602000000	23425000000	32763000000	0.855	1.138	0.851	1.136	0.842	1.178	1.354	2.43E-05
P35580	Myosin-10	MYH10	17	229	93.239	55	29	11	9	11	9	11	7	8	23	25	21	27	24	21	7	8	6	9	9	6	214920000	421650000	242470000	458210000	232260000	442540000	0.641	1.257	0.723	1.366	0.693	1.32	1.917	9.62E-05
P35606	Coatomer subunit beta'	COPB2	51.1	102.49	215.68	257	35	35	38	48	42	46	40	43	34	34	32	33	31	31	34	34	32	33	31	31	3817600000	3895300000	3812900000	3789300000	3669300000	4231100000	0.987	1.007	0.985	0.979	0.948	1.094	1.055	2.21E-01
P35610	Sterol O-acyltransferase 1	SOAT1	14.2	64.734	36.861	41	6	6	8	6	7	6	7	7	5	5	5	4	4	5	5	5	5	4	4	5	431860000	431060000	412410000	368670000	431180000	378330000	1.056	1.054	1.009	0.902	1.054	0.925	0.924	1.87E-01
P35611	Alpha-adducin	ADD1	26.9	80.954	43.952	54	13	13	8	11	6	11	9	9	9	11	10	12	10	11	9	11	10	12	10	11	386850000	411360000	388540000	393220000	370750000	409390000	0.983	1.046	0.988	1	0.943	1.041	1.059	4.88E-02
P35613	Basigin	BSG	38.4	42.2	202.43	174	11	11	29	31	26	30	27	31	11	11	11	11	11	11	11	11	11	11	11	11	10415000000	9959500000	9816000000	9095800000	10292000000	9928800000	1.05	1.004	0.99	0.917	1.038	1.001	0.95	2.02E-01
P35637	RNA-binding protein FUS	FUS	22.1	53.425	68.147	94	8	6	14	14	16	17	17	16	8	8	8	8	8	8	6	6	6	6	6	6	5139000000	5476200000	4979000000	5417700000	6015000000	5073800000	0.961	1.024	0.931	1.013	1.124	0.948	0.99	8.81E-01
P35658	Nuclear pore complex protein Nup214	NUP214	31.6	213.62	292.95	279	44	44	49	44	49	42	49	46	41	36	41	39	41	39	41	36	41	39	41	39	3371500000	2795900000	3411300000	3030200000	3454900000	2898400000	1.067	0.885	1.079	0.959	1.093	0.917	0.852	2.18E-03
P35659	Protein DEK	DEK	39.2	42.674	85.709	123	14	14	20	21	21	20	22	19	14	14	14	14	14	13	14	14	14	14	14	13	3797500000	3488000000	3976700000	3313300000	3730500000	3454200000	1.047	0.962	1.097	0.914	1.029	0.952	0.891	1.02E-02
P35813	Protein phosphatase 1A	PPM1A	10.2	42.447	7.8978	7	3	2	1	1	1	3	1	0	2	2	2	3	2	2	1	1	1	2	1	1	19595000	23420000	25622000	23327000	23497000	22905000	0.85	1.016	1.111	1.012	1.019	0.993	1.014	8.76E-01
P35914	Hydroxymethylglutaryl-CoA lyase, mitochondrial	HMGCL	24	34.36	19.476	21	7	7	4	2	3	5	3	4	7	7	6	6	6	6	7	7	6	6	6	6	181570000	157670000	192810000	186040000	197540000	202870000	0.974	0.846	1.034	0.998	1.06	1.088	0.956	5.79E-01
P35998	26S protease regulatory subunit 7	PSMC2	64.9	48.633	145.14	205	26	26	30	36	34	33	34	38	25	25	25	25	26	25	25	25	25	25	26	25	5152900000	5124600000	5177800000	5319000000	5109900000	5117800000	0.997	0.992	1.002	1.029	0.989	0.99	1.008	5.90E-01
P36404	ADP-ribosylation factor-like protein 2	ARL2	28.3	20.878	10.401	9	5	5	2	1	2	3	0	1	3	4	4	4	3	4	3	4	4	4	3	4	141730000	150640000	150450000	164290000	157480000	155890000	0.924	0.982	0.981	1.071	1.027	1.016	1.047	3.08E-01
P36405	ADP-ribosylation factor-like protein 3	ARL3	35.2	20.455	22.877	22	5	5	3	4	4	3	4	4	4	4	4	3	4	4	4	4	4	3	4	4	86312000	100390000	81021000	126440000	89061000	121260000	0.857	0.996	0.804	1.255	0.884	1.204	1.358	2.12E-02
P36406	E3 ubiquitin-protein ligase TRIM23	TRIM23	3	64.066	2.9333	9	2	2	2	1	2	1	2	1	2	2	2	1	2	2	2	2	2	1	2	2	254730000	284030000	285720000	0	256220000	286450000	0.932	1.039	1.045		0.937	1.048	1.074	2.29E-01
P36507	Dual specificity mitogen-activated protein kinase kinase 2	MAP2K2	37.2	44.424	39.989	42	12	8	7	7	6	7	7	8	11	10	9	10	10	9	7	6	6	7	6	6	169580000	198000000	162350000	203440000	182450000	209340000	0.904	1.056	0.866	1.085	0.973	1.116	1.187	8.80E-03
P36542	ATP synthase subunit gamma, mitochondrial	ATP5C1	45	32.996	52.103	142	11	11	25	20	24	25	25	23	11	11	11	11	11	11	11	11	11	11	11	11	5978000000	5717000000	6348200000	5996400000	6302700000	5456800000	1.002	0.958	1.064	1.005	1.056	0.915	0.922	6.68E-02
P36543	V-type proton ATPase subunit E 1	ATP6V1E1	38.5	26.145	131.9	50	9	9	8	7	9	8	11	7	9	9	9	9	9	9	9	9	9	9	9	9	623140000	628140000	640210000	682190000	595630000	662190000	0.976	0.984	1.003	1.068	0.933	1.037	1.061	1.38E-01
P36551	Oxygen-dependent coproporphyrinogen-III oxidase, mitochondrial	CPOX	54	50.151	148.42	112	20	20	19	18	18	20	20	17	18	17	18	19	19	19	18	17	18	19	19	19	1557900000	1478800000	1450600000	1525400000	1550100000	1329800000	1.051	0.998	0.979	1.029	1.046	0.897	0.951	3.35E-01
P36578	60S ribosomal protein L4	RPL4	49.2	47.697	142.18	262	21	21	39	43	45	43	45	47	21	21	21	21	21	21	21	21	21	21	21	21	15606000000	16107000000	15897000000	16598000000	16847000000	17781000000	0.947	0.978	0.965	1.008	1.023	1.079	1.044	3.16E-01
P36639	7,8-dihydro-8-oxoguanine triphosphatase	NUDT1	14.2	22.519	16.666	19	2	2	3	3	3	4	3	3	2	2	2	2	2	2	2	2	2	2	2	2	174360000	160650000	168410000	191180000	168510000	189860000	0.994	0.915	0.96	1.089	0.96	1.082	1.059	3.75E-01
P36776	Lon protease homolog, mitochondrial	LONP1	48.4	106.49	305	260	34	34	47	43	44	43	41	42	33	33	33	34	33	33	33	33	33	34	33	33	4333400000	4947700000	4625400000	4877200000	4981900000	4864000000	0.908	1.037	0.969	1.022	1.044	1.019	1.054	3.18E-01
P36871	Phosphoglucomutase-1	PGM1	56.9	61.448	82.328	109	23	23	19	19	14	21	16	20	21	22	20	20	20	20	21	22	20	20	20	20	1049000000	974830000	969050000	1078700000	935560000	1044100000	1.04	0.967	0.961	1.07	0.928	1.035	1.049	3.50E-01
P36873	Serine/threonine-protein phosphatase PP1-gamma catalytic subunit	PPP1CC	70	36.983	42.282	21	19	4	4	3	5	1	3	5	19	18	19	17	17	18	4	4	4	4	4	4	665940000	653180000	602200000	623440000	731330000	651930000	1.017	0.998	0.92	0.952	1.117	0.996	0.965	5.73E-01
P36897	TGF-beta receptor type-1	TGFBR1	14.1	55.959	16.569	12	5	5	1	4	2	3	0	2	3	3	3	3	4	4	3	3	3	3	4	4	60896000	80564000	81037000	0	54187000	59752000	0.905	1.197	1.204		0.805	0.888	1.073	7.37E-01
P36915	Guanine nucleotide-binding protein-like 1	GNL1	29.5	68.66	68.328	69	14	14	11	14	8	16	7	13	14	12	12	14	10	12	14	12	12	14	10	12	367430000	454430000	412860000	466460000	436820000	470340000	0.845	1.045	0.95	1.073	1.005	1.082	1.143	5.00E-02
P36941	Tumor necrosis factor receptor superfamily member 3	LTBR	18.6	46.709	37.437	30	5	5	6	4	6	5	6	3	5	4	4	5	5	4	5	4	4	5	5	4	189640000	132440000	151390000	126420000	177820000	123020000	1.263	0.882	1.008	0.842	1.185	0.819	0.736	1.72E-02
P36952	Serpin B5	SERPINB5	37.9	42.1	63.421	64	11	11	11	10	11	12	9	11	11	10	10	11	10	11	11	10	10	11	10	11	798010000	921080000	753470000	960730000	737570000	976270000	0.93	1.074	0.878	1.12	0.86	1.138	1.249	1.48E-03
P36954	DNA-directed RNA polymerase II subunit RPB9	POLR2I	59.2	14.523	47.161	31	5	5	5	5	5	6	5	5	5	5	5	5	5	5	5	5	5	5	5	5	277430000	226890000	255470000	253070000	255950000	212420000	1.124	0.919	1.035	1.025	1.037	0.86	0.878	8.21E-02
P36957	Dihydrolipoyllysine-residue succinyltransferase component of 2-oxoglutarate dehydrogenase complex, mitochondrial	DLST	42.4	48.755	120.42	145	15	15	24	23	25	21	26	26	15	13	13	14	14	15	15	13	13	14	14	15	5918700000	5887200000	6156300000	5769700000	5661100000	5874100000	1.007	1.002	1.047	0.982	0.963	0.999	0.988	6.68E-01
P36969	Phospholipid hydroperoxide glutathione peroxidase, mitochondrial	GPX4	20.8	22.174	6.4082	10	4	4	3	1	1	2	1	2	4	3	2	3	1	3	4	3	2	3	1	3	59741000	52631000	0	63688000	0	0	1.018	0.897		1.085			0.974
P37108	Signal recognition particle 14 kDa protein	SRP14	46.3	14.57	76.777	59	8	8	9	11	9	11	8	11	8	8	7	8	8	7	8	8	7	8	8	7	2197400000	2593400000	2482400000	2738400000	2142100000	2692000000	0.888	1.048	1.003	1.107	0.866	1.088	1.176	2.44E-02
P37198	Nuclear pore glycoprotein p62	NUP62	28.9	53.254	115.19	90	11	11	14	15	16	16	13	16	9	11	10	11	11	10	9	11	10	11	11	10	1402000000	1162700000	1267700000	1306500000	1232900000	1331500000	1.092	0.906	0.987	1.018	0.96	1.037	0.974	6.69E-01
P37235	Hippocalcin-like protein 1	HPCAL1	57.5	22.313	60.08	74	11	11	12	13	12	12	13	12	11	11	11	11	11	11	11	11	11	11	11	11	1277600000	1258500000	1235600000	1265400000	1270900000	1114100000	1.033	1.017	0.999	1.023	1.027	0.901	0.961	3.94E-01
P37268	Squalene synthase	FDFT1	25.9	48.115	55.069	49	9	9	6	7	9	8	8	11	8	9	9	8	8	8	8	9	9	8	8	8	324760000	392310000	374370000	444330000	372380000	439590000	0.83	1.003	0.957	1.136	0.952	1.123	1.191	4.24E-02
P37802	Transgelin-2	TAGLN2	87.9	22.391	105.77	151	14	13	26	29	20	28	23	25	13	13	13	14	13	14	12	12	12	13	12	13	3764100000	4468700000	4031100000	4492000000	3815600000	4533900000	0.9	1.068	0.963	1.074	0.912	1.084	1.162	1.72E-03
P37837	Transaldolase	TALDO1	36.2	37.54	33.552	76	13	13	13	14	12	12	12	13	12	12	12	12	12	12	12	12	12	12	12	12	1072400000	1123400000	1168700000	1127600000	1117600000	1133100000	0.954	1	1.04	1.003	0.994	1.008	1.008	7.91E-01
P38117	Electron transfer flavoprotein subunit beta	ETFB	58.8	27.843	104.74	178	17	17	27	30	30	31	31	29	15	17	16	16	17	17	15	17	16	16	17	17	5521900000	5752800000	5657200000	5465500000	6233300000	5976600000	0.957	0.997	0.981	0.948	1.081	1.036	0.988	7.97E-01
P38159	RNA-binding motif protein, X chromosome	RBMX	47.8	42.331	118.79	185	21	8	30	32	33	26	33	31	19	21	20	20	19	19	7	8	8	8	7	7	8410300000	6959100000	8463000000	7498200000	8177100000	7392700000	1.076	0.89	1.083	0.959	1.046	0.946	0.872	4.66E-03
P38398	Breast cancer type 1 susceptibility protein	BRCA1	3	207.72	43.403	20	3	3	3	3	3	3	5	3	2	3	3	2	3	2	2	3	3	2	3	2	48095000	65174000	47301000	57367000	30882000	65553000	0.918	1.244	0.903	1.095	0.589	1.251	1.49	2.95E-02
P38432	Coilin	COIL	14.9	62.608	27.463	34	6	6	6	4	5	7	5	7	5	4	5	6	5	6	5	4	5	6	5	6	209660000	196220000	248300000	227520000	260120000	215430000	0.927	0.867	1.098	1.006	1.15	0.952	0.89	2.13E-01
P38435	Vitamin K-dependent gamma-carboxylase	GGCX	10.3	87.56	10.894	11	7	7	1	1	2	1	4	2	2	2	3	1	4	3	2	2	3	1	4	3	66283000	0	61685000	0	66545000	57582000	1.052		0.979		1.056	0.914	0.888
P38571	Lysosomal acid lipase/cholesteryl ester hydrolase	LIPA	23.6	45.418	16.703	25	6	6	5	4	5	4	6	1	6	6	5	5	6	5	6	6	5	5	6	5	213840000	182220000	261810000	186020000	220700000	205340000	1.01	0.861	1.237	0.879	1.043	0.97	0.824	6.93E-02
P38606	V-type proton ATPase catalytic subunit A	ATP6V1A	53	68.303	146.41	142	23	23	24	25	20	26	27	20	21	21	20	19	22	20	21	21	20	19	22	20	1285300000	1234500000	1261400000	1329800000	1189600000	1281200000	1.017	0.977	0.998	1.052	0.941	1.014	1.029	4.12E-01
P38646	Stress-70 protein, mitochondrial	HSPA9	65.5	73.68	323.31	665	40	39	106	115	108	112	114	110	40	38	40	38	40	38	39	37	39	37	39	37	43463000000	39815000000	44118000000	39552000000	43969000000	38816000000	1.044	0.957	1.06	0.95	1.056	0.933	0.898	2.41E-04
P38919	Eukaryotic initiation factor 4A-III	EIF4A3	65.5	46.871	323.31	317	28	23	49	57	51	52	51	57	27	26	27	27	27	27	22	21	22	22	22	22	11869000000	11241000000	12094000000	11018000000	12500000000	11467000000	1.015	0.961	1.034	0.942	1.069	0.98	0.925	1.55E-02
P39019	40S ribosomal protein S19	RPS19	60.7	16.06	29.762	100	12	12	16	19	14	19	16	16	11	11	11	12	11	11	11	11	11	12	11	11	7959500000	9705800000	7602000000	10421000000	7944400000	10402000000	0.884	1.078	0.844	1.157	0.882	1.155	1.299	8.78E-04
P39023	60S ribosomal protein L3	RPL3	56.6	46.108	146.92	261	22	22	38	42	37	49	49	46	21	22	22	21	22	22	21	22	22	21	22	22	11988000000	12759000000	12116000000	12073000000	11527000000	12935000000	0.98	1.043	0.99	0.987	0.942	1.057	1.06	8.87E-02
P39060	Collagen alpha-1(XVIII) chain	COL18A1	2.9	178.19	19.331	7	3	3	0	1	2	2	1	1	2	3	2	2	2	2	2	3	2	2	2	2	21600000	0	35293000	0	20910000	22004000	0.866		1.414		0.838	0.882	0.848
P39210	Protein Mpv17	MPV17	17	19.733	20.952	13	2	2	3	2	2	1	3	2	2	2	2	2	2	2	2	2	2	2	2	2	266020000	252590000	432730000	280850000	257890000	207620000	0.94	0.893	1.529	0.993	0.911	0.734	0.775	3.03E-01
P39656	Dolichyl-diphosphooligosaccharide--protein glycosyltransferase 48 kDa subunit	DDOST	53.7	50.8	155.67	189	17	17	38	30	30	30	32	29	17	15	14	16	17	15	17	15	14	16	17	15	7833800000	7308700000	7791300000	6538300000	7059100000	7375300000	1.071	0.999	1.065	0.893	0.965	1.008	0.936	2.56E-01
P39687	Acidic leucine-rich nuclear phosphoprotein 32 family member A	ANP32A	32.9	28.585	129.4	74	9	7	14	13	10	13	11	13	9	9	9	9	9	9	7	7	7	7	7	7	2794600000	3270000000	3134900000	3025500000	2987000000	3175500000	0.912	1.067	1.023	0.987	0.975	1.036	1.062	2.03E-01
P39748	Flap endonuclease 1	FEN1	48.7	42.592	103.06	91	15	14	16	15	17	14	16	13	14	13	14	14	14	14	13	12	14	13	13	13	2341600000	2582300000	2369900000	2434700000	2262700000	2267600000	0.985	1.087	0.997	1.025	0.952	0.954	1.045	3.44E-01
P39880	Homeobox protein cut-like 1	CUX1	22.9	164.19	130.9	93	26	9	17	12	20	12	18	14	22	23	23	23	24	20	6	6	8	8	8	5	673590000	596430000	634420000	596060000	672630000	590750000	1.074	0.951	1.011	0.95	1.072	0.942	0.9	3.70E-02
P40121	Macrophage-capping protein	CAPG	12.6	38.498	5.8992	11	4	4	1	2	2	3	1	2	2	4	3	4	3	4	2	4	3	4	3	4	0	212260000	146260000	191050000	168330000	211950000		1.141	0.786	1.027	0.905	1.14	1.304	2.98E-02
P40222	Alpha-taxilin	TXLNA	42.5	61.89	158.92	86	17	17	17	15	13	15	11	15	13	11	14	13	13	13	13	11	14	13	13	13	838320000	1002800000	844760000	827620000	833460000	991590000	0.942	1.127	0.949	0.93	0.937	1.114	1.121	2.14E-01
P40227	T-complex protein 1 subunit zeta	CCT6A	66.9	58.024	195.17	283	27	27	45	47	44	48	46	53	26	27	26	27	26	27	26	27	26	27	26	27	9095500000	10727000000	8723500000	11306000000	9655800000	10784000000	0.905	1.068	0.868	1.125	0.961	1.073	1.194	5.56E-03
P40429	60S ribosomal protein L13a	RPL13A	41.4	23.577	47.359	80	9	9	8	17	9	19	11	16	9	8	8	9	8	8	9	8	8	9	8	8	4125300000	4501000000	4423000000	4804200000	4294100000	5101500000	0.908	0.991	0.974	1.058	0.946	1.123	1.122	5.45E-02
P40616	ADP-ribosylation factor-like protein 1	ARL1	47.5	20.417	62.44	53	6	6	8	10	9	9	7	10	6	6	6	5	6	6	6	6	6	5	6	6	553440000	724860000	425080000	669510000	463640000	677240000	0.945	1.238	0.726	1.143	0.792	1.156	1.436	7.38E-03
P40692	DNA mismatch repair protein Mlh1	MLH1	17.1	84.6	36.768	23	9	9	5	3	3	4	3	5	6	7	6	9	6	7	6	7	6	9	6	7	124100000	112790000	102450000	107000000	97373000	112060000	1.135	1.032	0.937	0.979	0.891	1.025	1.024	7.69E-01
P40763	Signal transducer and activator of transcription 3	STAT3	41.6	88.067	169.14	129	23	23	22	26	16	18	24	23	21	21	20	21	20	19	21	21	20	21	20	19	973350000	990430000	982360000	970390000	860580000	990330000	1.013	1.03	1.022	1.01	0.895	1.03	1.048	3.21E-01
P40818	Ubiquitin carboxyl-terminal hydrolase 8	USP8	3.4	127.52	9.0753	6	3	3	1	3	1	0	0	1	1	3	1	1	1	2	1	3	1	1	1	2	9384300	15290000	0	0	0	14095000	0.726	1.183				1.091	1.566
P40855	Peroxisomal biogenesis factor 19	PEX19	50.8	32.806	76.791	57	11	11	9	14	11	6	9	8	9	11	11	11	10	10	9	11	11	11	10	10	1324200000	1246700000	1485300000	1301400000	1490700000	1331800000	0.971	0.914	1.089	0.955	1.093	0.977	0.902	7.99E-02
P40925	Malate dehydrogenase, cytoplasmic	MDH1	40.4	36.426	45.467	110	13	13	18	17	18	20	20	17	12	12	12	13	13	13	12	12	12	13	13	13	2334800000	2464000000	2366100000	2252400000	2223900000	2285000000	1.006	1.062	1.019	0.97	0.958	0.984	1.011	7.62E-01
P40926	Malate dehydrogenase, mitochondrial	MDH2	68	35.503	137.33	315	20	20	51	51	48	53	56	56	19	20	19	19	20	20	19	20	19	19	20	20	40587000000	39310000000	40090000000	38874000000	40489000000	40551000000	1.015	0.983	1.003	0.972	1.013	1.014	0.98	1.97E-01
P40937	Replication factor C subunit 5	RFC5	49.1	38.496	110.73	63	12	12	10	11	10	12	11	9	11	11	10	10	10	10	11	11	10	10	10	10	1126700000	1046200000	1062200000	1055000000	867580000	958930000	1.105	1.026	1.042	1.035	0.851	0.941	1.001	9.89E-01
P40938	Replication factor C subunit 3	RFC3	57.3	40.556	93.232	105	16	16	18	17	18	19	16	17	16	15	15	16	15	16	16	15	15	16	15	16	1391300000	1457900000	1369900000	1515400000	1608700000	1600600000	0.933	0.978	0.919	1.017	1.079	1.074	1.047	4.77E-01
P40939	Trifunctional enzyme subunit alpha, mitochondrial	HADHA	59.8	82.999	309.1	292	35	35	51	50	44	44	50	53	34	33	35	33	34	32	34	33	35	33	34	32	9164200000	8471600000	8710800000	8686800000	9376800000	8376900000	1.042	0.963	0.99	0.987	1.066	0.952	0.937	5.76E-02
P41091	Eukaryotic translation initiation factor 2 subunit 3	EIF2S3	58.7	51.109	191.84	244	23	23	35	46	41	40	38	44	22	23	23	22	23	23	22	23	23	22	23	23	6863900000	8017900000	7198200000	8213700000	6940600000	7973000000	0.911	1.064	0.955	1.09	0.921	1.058	1.152	1.04E-03
P41208	Centrin-2	CETN2	29.7	19.738	7.7484	11	4	4	1	1	2	2	3	2	3	3	2	3	3	3	3	3	2	3	3	3	45066000	43172000	0	0	52350000	0	0.962	0.921			1.117		0.886
P41212	Transcription factor ETV6	ETV6	9.7	52.999	7.5394	15	4	4	3	2	3	2	2	3	3	2	4	2	3	3	3	2	4	2	3	3	49263000	0	62256000	46973000	49087000	47739000	0.965		1.219	0.92	0.961	0.935	0.885	3.53E-01
P41214	Eukaryotic translation initiation factor 2D	EIF2D	10.4	64.706	11.428	14	4	4	2	3	2	2	4	1	3	3	3	2	3	4	3	3	3	2	3	4	67587000	51531000	73465000	51161000	52062000	64304000	1.126	0.859	1.224	0.852	0.867	1.071	0.865	3.22E-01
P41223	Protein BUD31 homolog	BUD31	41	17	45.532	68	7	7	11	10	11	10	13	13	7	7	7	7	7	7	7	7	7	7	7	7	877520000	832140000	804550000	986910000	896780000	974450000	0.98	0.929	0.899	1.102	1.002	1.088	1.083	2.78E-01
P41227	N-alpha-acetyltransferase 10	NAA10	50.2	26.458	47.986	63	11	11	9	12	8	12	12	10	11	11	10	11	11	11	11	11	10	11	11	11	677720000	718000000	655520000	665440000	691540000	731640000	0.982	1.041	0.95	0.964	1.002	1.06	1.045	2.56E-01
P41229	Lysine-specific demethylase 5C	KDM5C	2.8	175.72	5.8364	7	4	3	2	0	2	0	3	0	3	1	2	3	3	2	2	1	2	2	3	2	60983000	0	60353000	132700000	67049000	74840000	0.77		0.762	1.676	0.847	0.945	1.653	3.92E-01
P41240	Tyrosine-protein kinase CSK	CSK	27.6	50.704	20.752	21	9	9	4	3	3	5	3	3	8	8	7	9	8	7	8	8	7	9	8	7	205180000	201810000	194100000	203720000	186330000	190120000	1.042	1.025	0.986	1.035	0.946	0.966	1.017	6.54E-01
P41247	Patatin-like phospholipase domain-containing protein 4	PNPLA4	8.7	27.98	3.3036	3	2	2	1	1	1	0	0	0	2	2	2	2	2	2	2	2	2	2	2	2	22857000	21103000	27957000	0	0	0	0.953	0.88	1.166				0.831
P41250	Glycine--tRNA ligase	GARS	50.6	83.165	186.46	229	31	31	37	41	40	34	35	42	29	30	31	29	30	31	29	30	31	29	30	31	4757700000	5150200000	4725900000	5065300000	5037300000	5179900000	0.954	1.033	0.948	1.016	1.01	1.039	1.06	4.96E-02
P41252	Isoleucine--tRNA ligase, cytoplasmic	IARS	48.8	144.5	256.2	291	48	48	43	49	46	54	45	54	41	44	46	44	44	45	41	44	46	44	44	45	4749900000	5255600000	4707600000	5072700000	4705300000	5223300000	0.959	1.061	0.951	1.024	0.95	1.055	1.098	1.36E-03
P41567	Eukaryotic translation initiation factor 1	EIF1	75.2	12.732	53.052	52	6	2	10	8	8	9	9	8	6	6	6	6	6	6	2	2	2	2	2	2	1536100000	2044500000	1406100000	2158900000	1473300000	2121300000	0.858	1.142	0.786	1.206	0.823	1.185	1.432	2.23E-04
P41743	Protein kinase C iota type	PRKCI	27.2	68.262	92.803	56	10	10	10	9	8	8	11	10	9	10	10	9	10	10	9	10	10	9	10	10	602670000	571040000	578140000	525020000	552210000	618800000	1.049	0.994	1.006	0.914	0.961	1.077	0.99	8.54E-01
P42025	Beta-centractin	ACTR1B	17	42.293	11.35	11	5	2	2	2	2	2	2	1	5	5	5	5	5	5	2	2	2	2	2	2	151870000	123600000	124690000	165270000	118800000	133310000	1.115	0.907	0.915	1.213	0.872	0.978	1.068	6.10E-01
P42126	Enoyl-CoA delta isomerase 1, mitochondrial	ECI1	35.1	32.816	28.649	54	9	9	7	8	10	13	9	7	7	8	8	9	8	7	7	8	8	9	8	7	947330000	883910000	977530000	975120000	1030100000	1049800000	0.969	0.904	1	0.998	1.054	1.074	0.984	7.89E-01
P42166	Lamina-associated polypeptide 2, isoform alpha	TMPO	64	75.491	323.31	297	31	20	54	45	46	48	51	53	29	28	29	30	28	30	19	19	19	20	20	20	7509700000	5920900000	7225700000	6417200000	7339100000	6345700000	1.105	0.872	1.064	0.945	1.08	0.934	0.846	3.00E-03
P42167	Lamina-associated polypeptide 2, isoforms beta/gamma	TMPO	55.7	50.67	119.78	111	21	10	18	17	21	17	22	16	19	18	20	19	18	19	9	9	10	9	10	9	3723600000	3233200000	3616200000	3266100000	3584300000	3218600000	1.082	0.94	1.051	0.949	1.042	0.936	0.89	8.23E-04
P42224	Signal transducer and activator of transcription 1-alpha/beta	STAT1	39.2	87.334	91.897	122	23	23	18	24	18	20	19	23	21	23	21	20	21	21	21	23	21	20	21	21	1008600000	984020000	954630000	1080300000	1001200000	1076300000	0.991	0.967	0.938	1.062	0.984	1.058	1.059	1.75E-01
P42285	Superkiller viralicidic activity 2-like 2	SKIV2L2	48.9	117.8	249.4	313	45	45	55	53	46	55	52	52	42	44	42	43	42	43	42	44	42	43	42	43	5256100000	5193900000	5131200000	5093800000	5227500000	5159800000	1.015	1.003	0.991	0.984	1.01	0.997	0.989	3.09E-01
P42345	Serine/threonine-protein kinase mTOR	MTOR	7.3	288.89	44.173	30	16	16	3	7	4	6	7	3	10	12	8	12	10	9	10	12	8	12	10	9	157770000	183800000	242490000	166940000	176140000	237380000	0.813	0.947	1.249	0.86	0.908	1.223	1.02	9.12E-01
P42356	Phosphatidylinositol 4-kinase alpha	PI4KA	14.7	236.83	81.699	96	25	25	13	15	18	14	22	14	22	19	19	19	23	19	22	19	19	19	23	19	570890000	474720000	580850000	464860000	618700000	501400000	1.067	0.887	1.085	0.869	1.156	0.937	0.814	3.80E-03
P42566	Epidermal growth factor receptor substrate 15	EPS15	27.1	98.655	58.177	45	15	15	9	7	7	7	7	8	13	13	13	13	13	14	13	13	13	13	13	14	332130000	316860000	327050000	352080000	341160000	323430000	1	0.954	0.985	1.06	1.027	0.974	0.992	8.30E-01
P42677	40S ribosomal protein S27	RPS27	39.3	9.461	9.9312	46	4	2	9	6	9	8	8	6	4	4	4	4	4	4	2	2	2	2	2	2	2423000000	2750700000	2626200000	2429900000	2402800000	2423800000	0.966	1.096	1.047	0.968	0.958	0.966	1.02	7.15E-01
P42695	Condensin-2 complex subunit D3	NCAPD3	12.3	168.89	100.38	73	16	16	14	10	15	10	13	11	14	12	15	12	15	13	14	12	15	12	15	13	434630000	390000000	442290000	397750000	404820000	464410000	1.029	0.923	1.047	0.942	0.959	1.1	0.977	7.26E-01
P42696	RNA-binding protein 34	RBM34	47.9	48.564	80.886	104	18	18	18	19	15	17	19	16	18	17	17	17	17	16	18	17	17	17	17	16	1427600000	1307800000	1430000000	1230500000	1291700000	1304100000	1.072	0.982	1.074	0.924	0.97	0.979	0.926	1.21E-01
P42704	Leucine-rich PPR motif-containing protein, mitochondrial	LRPPRC	72.3	157.9	323.31	805	89	88	130	130	138	137	129	141	87	87	87	86	87	89	86	86	86	85	86	88	26886000000	24284000000	26055000000	24884000000	26785000000	24442000000	1.052	0.95	1.02	0.974	1.048	0.956	0.923	3.02E-03
P42766	60S ribosomal protein L35	RPL35	26	14.551	12.182	37	4	4	7	6	7	7	5	5	4	4	4	4	4	4	4	4	4	4	4	4	3268600000	3245300000	2983800000	2919300000	3040800000	2894400000	1.069	1.061	0.976	0.954	0.994	0.946	0.975	6.13E-01
P42785	Lysosomal Pro-X carboxypeptidase	PRCP	26.6	55.799	74.119	65	12	12	13	10	10	11	12	9	11	12	11	11	11	11	11	12	11	11	11	11	683690000	442010000	633290000	450110000	587160000	440960000	1.267	0.819	1.174	0.834	1.088	0.817	0.7	2.10E-02
P42858	Huntingtin	HTT	0.6	347.6	1.8484	5	2	2	1	1	0	0	2	1	2	2	2	1	2	1	2	2	2	1	2	1	70542000	73567000	76597000	0	93571000	0	0.898	0.936	0.975		1.191		0.917
P42892	Endothelin-converting enzyme 1	ECE1	14.4	87.163	11.11	12	8	8	2	2	3	2	3	0	5	2	5	6	4	4	5	2	5	6	4	4	247550000	141250000	328330000	228260000	265940000	233120000	1.028	0.587	1.364	0.948	1.105	0.968	0.716	1.08E-01
P43003	Excitatory amino acid transporter 1	SLC1A3	9.8	59.572	13.653	12	3	3	3	1	3	2	2	1	3	1	3	2	3	3	3	1	3	2	3	3	146140000	74282000	113500000	85398000	118790000	98870000	1.377	0.7	1.069	0.804	1.119	0.931	0.683	3.19E-02
P43007	Neutral amino acid transporter A	SLC1A4	13	55.722	43.774	26	4	4	3	4	6	3	4	6	3	3	4	3	4	4	3	3	4	3	4	4	360440000	367440000	369000000	274820000	315740000	320920000	1.077	1.098	1.102	0.821	0.943	0.959	0.922	4.34E-01
P43034	Platelet-activating factor acetylhydrolase IB subunit alpha	PAFAH1B1	59.3	46.637	148.42	106	17	17	17	20	17	18	17	17	16	14	15	15	14	15	16	14	15	15	14	15	1854900000	1771000000	1672000000	1869600000	1777100000	1830200000	1.033	0.986	0.931	1.041	0.99	1.019	1.031	4.08E-01
P43243	Matrin-3	MATR3	51.1	94.622	323.31	486	35	35	82	77	84	80	79	84	33	34	35	34	35	35	33	34	35	34	35	35	15248000000	12739000000	15279000000	12726000000	15139000000	12880000000	1.089	0.91	1.091	0.909	1.081	0.92	0.84	1.51E-06
P43246	DNA mismatch repair protein Msh2	MSH2	26.3	104.74	71.486	107	23	23	19	22	17	18	13	18	21	22	21	20	19	20	21	22	21	20	19	20	598850000	646400000	626610000	670700000	619970000	712810000	0.927	1.001	0.97	1.038	0.96	1.104	1.1	4.37E-02
P43250	G protein-coupled receptor kinase 6	GRK6	18.6	65.99	17.734	19	7	6	2	3	5	4	2	3	4	4	6	4	4	4	3	4	5	4	3	4	88166000	109860000	94783000	112440000	83483000	93813000	0.908	1.132	0.976	1.158	0.86	0.966	1.186	6.84E-02
P43304	Glycerol-3-phosphate dehydrogenase, mitochondrial	GPD2	64.9	80.852	214.42	267	41	41	46	37	48	44	46	46	39	36	40	37	39	37	39	36	40	37	39	37	5695600000	5495600000	6012900000	5589500000	5983800000	5272500000	1.004	0.968	1.06	0.985	1.054	0.929	0.925	3.23E-02
P43307	Translocon-associated protein subunit alpha	SSR1	26.9	32.235	42.224	53	5	5	9	7	11	9	8	9	5	5	5	5	5	5	5	5	5	5	5	5	1244000000	1200300000	1105400000	1286100000	1260300000	1133100000	1.032	0.996	0.917	1.067	1.046	0.94	1.003	9.63E-01
P43357	Melanoma-associated antigen 3	MAGEA3	14.3	34.747	15.703	10	3	1	2	2	1	3	1	1	3	3	3	2	2	3	1	1	1	1	1	1	111080000	72980000	78764000	54762000	103310000	57076000	1.394	0.916	0.989	0.687	1.297	0.716	0.63	3.30E-02
P43358	Melanoma-associated antigen 4	MAGEA4	33.8	34.899	55.119	124	10	10	19	20	22	21	22	20	10	10	10	10	10	10	10	10	10	10	10	10	4491400000	4677200000	4368300000	4868100000	4775300000	5132700000	0.952	0.991	0.926	1.032	1.012	1.088	1.076	1.24E-01
P43487	Ran-specific GTPase-activating protein	RANBP1	52.2	23.31	84.87	60	6	6	7	9	10	14	10	10	5	5	6	6	6	6	5	5	6	6	6	6	2832800000	2821600000	2674200000	2944000000	2619500000	3591300000	0.972	0.968	0.918	1.01	0.899	1.232	1.151	1.72E-01
P43490	Nicotinamide phosphoribosyltransferase	NAMPT	63.3	55.52	219.74	163	25	25	26	29	23	30	26	29	23	24	24	25	22	25	23	24	24	25	22	25	1723400000	2000700000	1815400000	1990000000	1896600000	2076900000	0.899	1.044	0.947	1.038	0.989	1.083	1.116	2.09E-02
P43686	26S protease regulatory subunit 6B	PSMC4	75.4	47.366	176.27	235	29	29	37	41	41	40	38	38	27	28	29	28	27	27	27	28	29	28	27	27	2480100000	2656600000	2422500000	2858900000	2501500000	2720200000	0.951	1.019	0.929	1.097	0.96	1.044	1.112	1.25E-02
P43897	Elongation factor Ts, mitochondrial	TSFM	55.7	35.39	63.681	74	12	12	11	11	12	15	13	12	11	12	11	12	11	11	11	12	11	12	11	11	1188600000	1166600000	1420300000	1134000000	1387400000	1214100000	0.949	0.932	1.135	0.906	1.108	0.97	0.879	1.02E-01
P45877	Peptidyl-prolyl cis-trans isomerase C	PPIC	10.8	22.763	4.1164	8	2	2	1	1	1	1	2	2	2	2	2	2	2	2	2	2	2	2	2	2	43478000	44523000	36378000	41641000	33800000	38158000	1.096	1.123	0.917	1.05	0.852	0.962	1.094	3.58E-01
P45880	Voltage-dependent anion-selective channel protein 2	VDAC2	67	31.566	187.26	275	15	15	46	52	48	42	43	44	15	14	15	14	15	14	15	14	15	14	15	14	12193000000	11770000000	11922000000	11202000000	11490000000	11753000000	1.04	1.004	1.017	0.956	0.98	1.003	0.975	3.49E-01
P45954	Short/branched chain specific acyl-CoA dehydrogenase, mitochondrial	ACADSB	31.9	47.485	77.523	68	10	10	9	14	12	11	11	11	10	9	10	10	10	9	10	9	10	10	10	9	1090300000	930230000	1117600000	846560000	1149400000	942460000	1.077	0.919	1.104	0.836	1.135	0.931	0.81	3.56E-03
P45973	Chromobox protein homolog 5	CBX5	51.8	22.225	32.232	51	9	8	9	9	11	6	8	8	9	8	9	7	9	8	8	7	8	6	8	7	799120000	711140000	823460000	757470000	773120000	687400000	1.053	0.937	1.085	0.998	1.019	0.906	0.9	3.38E-02
P45974	Ubiquitin carboxyl-terminal hydrolase 5	USP5	26.8	95.785	111.66	98	17	16	12	16	14	18	19	19	17	17	16	17	15	16	16	16	15	16	14	15	819200000	972850000	824730000	982070000	838650000	1088900000	0.889	1.056	0.895	1.066	0.911	1.182	1.226	3.83E-02
P45984	Mitogen-activated protein kinase 9	MAPK9	8.7	48.139	7.8076	9	3	1	0	1	4	0	3	1	0	1	3	1	2	3	0	0	1	1	1	1	0	0	40411000	0	31209000	29839000			1.195		0.923	0.882	0.833
P45985	Dual specificity mitogen-activated protein kinase kinase 4	MAP2K4	8	44.287	11.485	10	2	2	2	1	3	2	1	1	2	1	2	2	2	2	2	1	2	2	2	2	61362000	61904000	58622000	65908000	61781000	58085000	1.001	1.01	0.957	1.076	1.008	0.948	1.023	6.06E-01
P46013	Proliferation marker protein Ki-67	MKI67	43.8	358.69	323.31	652	100	100	121	105	116	105	113	92	90	87	89	89	90	85	90	87	89	89	90	85	8811300000	6508200000	8559200000	6671500000	8472700000	6596200000	1.159	0.856	1.126	0.877	1.114	0.868	0.765	5.76E-05
P46019	Phosphorylase b kinase regulatory subunit alpha, liver isoform	PHKA2	3	138.41	6.0498	5	3	2	0	1	1	2	0	1	2	2	3	3	2	1	1	1	2	2	1	1	0	0	35335000	38655000	0	0			0.955	1.045			1.094
P46020	Phosphorylase b kinase regulatory subunit alpha, skeletal muscle isoform	PHKA1	6.9	137.31	7.2171	19	6	5	3	5	2	4	2	3	5	5	6	4	5	3	4	4	5	3	4	3	293540000	297640000	289610000	275710000	295710000	256350000	1.031	1.045	1.017	0.968	1.038	0.9	0.944	3.07E-01
P46060	Ran GTPase-activating protein 1	RANGAP1	37.1	63.541	95.136	118	20	20	19	22	20	20	16	21	20	19	20	20	19	20	20	19	20	20	19	20	2937100000	2630700000	2891300000	2611100000	2928500000	2772000000	1.051	0.941	1.034	0.934	1.048	0.992	0.915	9.24E-03
P46063	ATP-dependent DNA helicase Q1	RECQL	47.1	73.457	129.47	174	23	23	28	29	31	31	28	27	23	21	23	23	23	21	23	21	23	23	23	21	1389600000	1459600000	1312000000	1431000000	1378200000	1553700000	0.978	1.027	0.923	1.007	0.97	1.094	1.089	5.16E-02
P46087	Probable 28S rRNA (cytosine(4447)-C(5))-methyltransferase	NOP2	44.1	89.301	141.31	226	28	28	40	40	35	37	38	36	28	28	27	27	27	27	28	28	27	27	27	27	5370100000	5056300000	5717100000	5439300000	5854600000	5628900000	0.974	0.917	1.037	0.987	1.062	1.021	0.952	2.86E-01
P46100	Transcriptional regulator ATRX	ATRX	8.5	282.58	70.923	40	17	17	9	6	6	6	7	6	15	11	13	13	13	11	15	11	13	13	13	11	685130000	631120000	734710000	690610000	742440000	704550000	0.981	0.904	1.052	0.989	1.064	1.009	0.937	1.91E-01
P46108	Adapter molecule crk	CRK	45.1	33.83	59.936	39	9	9	6	7	6	8	5	7	8	8	8	9	8	6	8	8	8	9	8	6	224080000	217610000	184120000	218180000	178800000	233790000	1.07	1.039	0.879	1.042	0.854	1.116	1.141	1.45E-01
P46109	Crk-like protein	CRKL	30	33.777	28.806	19	6	6	3	3	3	5	2	3	6	5	4	5	5	5	6	5	4	5	5	5	393180000	417380000	406740000	499380000	400690000	487200000	0.906	0.961	0.937	1.15	0.923	1.122	1.169	1.20E-01
P46199	Translation initiation factor IF-2, mitochondrial	MTIF2	22	81.316	48.091	33	12	12	6	4	7	3	5	8	10	9	10	8	9	10	10	9	10	8	9	10	315760000	258550000	332430000	278810000	280800000	259230000	1.098	0.899	1.156	0.969	0.976	0.901	0.857	5.65E-02
P46379	Large proline-rich protein BAG6	BAG6	32.1	119.41	199.91	129	22	22	23	27	17	21	19	22	19	18	19	21	18	19	19	18	19	21	18	19	847950000	867890000	852550000	878780000	831210000	900790000	0.982	1.005	0.988	1.018	0.963	1.044	1.046	2.96E-02
P46459	Vesicle-fusing ATPase	NSF	45	82.593	150.76	188	28	27	27	32	30	32	31	36	28	27	27	28	27	27	27	26	26	27	26	26	2062900000	1945700000	2044200000	2000600000	2149800000	1972300000	1.017	0.959	1.007	0.986	1.059	0.972	0.946	3.57E-02
P46734	Dual specificity mitogen-activated protein kinase kinase 3	MAP2K3	21	39.318	36.164	24	6	6	4	4	3	4	4	5	5	5	5	5	5	6	5	5	5	5	5	6	141010000	149610000	131420000	146180000	130040000	141570000	1.007	1.069	0.939	1.044	0.929	1.011	1.087	4.91E-02
P46736	Lys-63-specific deubiquitinase BRCC36	BRCC3	42.1	36.072	30.938	28	10	10	4	5	4	5	5	5	8	8	9	9	7	8	8	8	9	9	7	8	269300000	363480000	274210000	319630000	255900000	327310000	0.893	1.205	0.909	1.06	0.848	1.085	1.264	8.50E-03
P46776	60S ribosomal protein L27a	RPL27A	35.1	16.561	26.659	62	6	6	10	10	11	12	10	9	6	6	6	6	6	6	6	6	6	6	6	6	3471200000	3737000000	3789900000	3735000000	3785600000	4221100000	0.916	0.986	1	0.985	0.999	1.114	1.059	3.27E-01
P46777	60S ribosomal protein L5	RPL5	53.5	34.362	62.889	215	15	15	31	33	36	41	35	39	14	15	14	15	14	14	14	15	14	15	14	14	11079000000	9150200000	10956000000	9129300000	9885700000	10228000000	1.1	0.909	1.088	0.906	0.982	1.016	0.893	9.59E-02
P46778	60S ribosomal protein L21	RPL21	38.8	18.565	23.27	57	7	7	10	7	11	9	12	8	6	4	5	5	6	5	6	4	5	5	6	5	1588300000	1720700000	1468100000	1960500000	1595600000	1484000000	0.971	1.052	0.897	1.198	0.975	0.907	1.11	3.00E-01
P46779	60S ribosomal protein L28	RPL28	56.9	15.747	18.585	71	10	10	11	10	15	11	12	12	8	9	10	10	9	10	8	9	10	10	9	10	4207700000	4438700000	3770200000	3872900000	3675900000	4311200000	1.04	1.097	0.932	0.957	0.909	1.066	1.083	2.45E-01
P46781	40S ribosomal protein S9	RPS9	54.1	22.591	43.027	112	16	16	17	18	20	19	18	20	13	16	16	16	16	15	13	16	16	16	16	15	5721100000	6122800000	5574200000	6088300000	5624600000	6419900000	0.966	1.033	0.941	1.028	0.949	1.083	1.101	7.42E-03
P46782	40S ribosomal protein S5	RPS5	54.9	22.876	71.514	156	12	12	26	25	26	25	27	27	12	12	12	12	12	12	12	12	12	12	12	12	11487000000	13013000000	11493000000	13355000000	11731000000	14513000000	0.912	1.033	0.912	1.06	0.931	1.152	1.178	1.11E-02
P46783	40S ribosomal protein S10	RPS10	58.8	18.898	103.18	154	10	10	26	29	22	29	23	25	10	10	10	10	10	10	10	10	10	10	10	10	4455100000	4654500000	5244900000	4638800000	4698800000	5133500000	0.927	0.969	1.092	0.966	0.978	1.069	1.002	9.75E-01
P46926	Glucosamine-6-phosphate isomerase 1	GNPDA1	60.9	32.668	68.198	47	11	7	6	11	5	10	6	9	10	10	8	9	7	9	6	6	4	5	4	5	392760000	408790000	371120000	485890000	383360000	475500000	0.936	0.974	0.885	1.158	0.914	1.133	1.194	4.08E-02
P46934	E3 ubiquitin-protein ligase NEDD4	NEDD4	12.3	149.11	64.835	25	11	9	4	7	3	4	3	4	7	9	7	8	7	9	5	7	5	6	5	7	91360000	157240000	95688000	173070000	103450000	120530000	0.739	1.273	0.774	1.401	0.837	0.976	1.552	2.86E-02
P46937	Transcriptional coactivator YAP1	YAP1	41.9	54.461	106.2	61	11	11	10	9	11	10	11	10	9	9	10	10	10	11	9	9	10	10	10	11	625050000	459460000	536830000	519670000	611430000	492990000	1.156	0.849	0.992	0.961	1.13	0.911	0.83	3.66E-02
P46939	Utrophin	UTRN	39.8	394.46	323.31	563	104	101	96	83	94	95	100	95	96	84	95	92	98	92	94	82	94	90	95	90	4538500000	4101400000	4530300000	4165300000	4379900000	4049200000	1.057	0.955	1.055	0.97	1.02	0.943	0.916	3.58E-03
P46940	Ras GTPase-activating-like protein IQGAP1	IQGAP1	61.9	189.25	323.31	642	82	80	88	126	92	124	96	116	74	79	77	78	78	78	73	77	76	76	77	76	13215000000	19836000000	13393000000	20944000000	13544000000	20734000000	0.78	1.171	0.79	1.236	0.799	1.224	1.532	3.78E-05
P46976	Glycogenin-1	GYG1	16.6	39.383	23.284	21	4	4	2	4	4	3	4	4	3	3	4	3	4	4	3	3	4	3	4	4	102460000	150840000	110390000	112290000	118740000	116820000	0.864	1.272	0.931	0.947	1.001	0.985	1.146	2.84E-01
P46977	Dolichyl-diphosphooligosaccharide--protein glycosyltransferase subunit STT3A	STT3A	18.2	80.529	29.771	102	16	15	19	19	19	15	16	14	14	16	14	13	14	13	13	15	13	12	13	12	2015600000	1818400000	2191500000	1881800000	2194200000	1777700000	1.018	0.918	1.107	0.95	1.108	0.898	0.856	9.76E-03
P47755	F-actin-capping protein subunit alpha-2	CAPZA2	55.6	32.949	69.519	45	10	8	6	6	8	9	9	7	9	10	10	10	10	10	7	8	8	8	8	8	544710000	734930000	485870000	628600000	458400000	724940000	0.914	1.233	0.815	1.054	0.769	1.216	1.403	9.22E-03
P47756	F-actin-capping protein subunit beta	CAPZB	47.3	31.35	128.85	117	14	14	21	19	16	21	20	20	14	12	13	12	13	14	14	12	13	12	13	14	2654000000	2819700000	2569600000	2776200000	2769600000	2677300000	0.979	1.04	0.948	1.024	1.022	0.988	1.035	2.63E-01
P47813	Eukaryotic translation initiation factor 1A, X-chromosomal	EIF1AX	31.2	16.46	10.285	30	4	4	3	6	4	6	4	7	3	4	4	4	3	4	3	4	4	4	3	4	354670000	431190000	293710000	416580000	344340000	402090000	0.949	1.154	0.786	1.115	0.921	1.076	1.259	1.42E-02
P47895	Aldehyde dehydrogenase family 1 member A3	ALDH1A3	42.2	56.108	50.047	95	17	16	15	15	17	17	17	14	13	15	15	16	16	15	12	14	14	15	15	14	654110000	635160000	699360000	608770000	706090000	587500000	1.009	0.979	1.078	0.939	1.089	0.906	0.889	2.36E-02
P47897	Glutamine--tRNA ligase	QARS	57.5	87.798	253.34	248	34	34	43	40	39	43	40	43	34	33	34	34	34	33	34	33	34	34	34	33	2876800000	2866600000	2782000000	2914200000	2755100000	2980200000	1.005	1.001	0.972	1.018	0.962	1.041	1.041	7.95E-02
P47914	60S ribosomal protein L29	RPL29	23.3	17.752	5.9933	34	4	4	4	6	8	7	4	5	3	3	4	4	3	3	3	3	4	4	3	3	3164100000	3563300000	2458000000	2756900000	2411000000	3498400000	1.063	1.198	0.826	0.927	0.81	1.176	1.222	1.69E-01
P47985	Cytochrome b-c1 complex subunit Rieske, mitochondrial	UQCRFS1	42.3	29.668	101.67	102	12	12	17	17	19	15	17	17	10	11	11	12	9	11	10	11	11	12	9	11	2848900000	3098500000	3344000000	2782900000	3095200000	2798100000	0.951	1.035	1.117	0.929	1.034	0.934	0.934	3.13E-01
P48047	ATP synthase subunit O, mitochondrial	ATP5O	53.1	23.277	52.49	99	9	9	16	17	15	18	18	15	8	8	8	8	9	8	8	8	8	8	9	8	4732700000	4874600000	4407300000	4184300000	4655300000	4872400000	1.024	1.055	0.954	0.905	1.007	1.054	1.01	8.65E-01
P48059	LIM and senescent cell antigen-like-containing domain protein 1	LIMS1	19.4	37.251	12.298	14	5	5	1	3	2	2	3	3	3	3	4	3	4	4	3	3	4	3	4	4	117640000	119700000	109540000	138110000	143890000	86751000	0.986	1.004	0.918	1.158	1.206	0.727	0.929	6.54E-01
P48060	Glioma pathogenesis-related protein 1	GLIPR1	26.7	30.366	23.622	26	5	5	5	3	4	4	5	5	5	2	4	4	5	5	5	2	4	4	5	5	185720000	152720000	178750000	184140000	226960000	165710000	1.019	0.838	0.98	1.01	1.245	0.909	0.85	1.67E-01
P48066	Sodium- and chloride-dependent GABA transporter 3	SLC6A11	6.2	70.605	8.329	5	3	3	2	0	0	1	1	1	2	2	1	2	2	2	2	2	1	2	2	2	27435000	27538000	0	0	27913000	0	0.993	0.997			1.01		0.995
P48147	Prolyl endopeptidase	PREP	59.2	80.699	171.31	159	34	34	21	29	21	30	26	32	27	30	29	30	29	28	27	30	29	30	29	28	1262000000	1569600000	1270100000	1667800000	1382500000	1661500000	0.859	1.069	0.865	1.135	0.941	1.131	1.251	2.84E-03
P48163	NADP-dependent malic enzyme	ME1	19.6	64.149	20.146	21	7	7	3	5	3	3	3	4	4	4	5	5	6	5	4	4	5	5	6	5	113800000	129360000	69297000	105950000	88318000	108720000	1.109	1.261	0.676	1.033	0.861	1.06	1.268	1.79E-01
P48200	Iron-responsive element-binding protein 2	IREB2	1.7	105.04	2.0731	7	2	2	1	2	1	1	1	1	1	2	1	2	2	2	1	2	1	2	2	2	0	76127000	0	108420000	93328000	83920000		0.842		1.199	1.032	0.928	0.959
P48444	Coatomer subunit delta	ARCN1	49.7	57.21	118.34	201	24	24	34	34	33	34	34	32	24	23	23	22	23	22	24	23	23	22	23	22	3217300000	3097200000	3052500000	3057400000	3155200000	3150400000	1.031	0.992	0.978	0.979	1.011	1.009	0.987	5.08E-01
P48449	Lanosterol synthase	LSS	27.7	83.308	48.284	73	17	17	12	13	12	12	12	12	14	16	16	16	16	16	14	16	16	16	16	16	1349400000	1413300000	1511000000	1350500000	1417800000	1453800000	0.953	0.998	1.067	0.954	1.001	1.027	0.986	7.35E-01
P48506	Glutamate--cysteine ligase catalytic subunit	GCLC	18.2	72.765	51.243	31	9	9	5	6	4	6	5	5	7	8	7	8	7	8	7	8	7	8	7	8	171830000	180740000	170230000	181620000	180500000	189520000	0.96	1.009	0.951	1.014	1.008	1.058	1.056	8.24E-02
P48507	Glutamate--cysteine ligase regulatory subunit	GCLM	36.1	30.727	23.564	33	8	8	3	6	6	8	5	5	7	6	8	8	7	8	7	6	8	8	7	8	265030000	322440000	294600000	330030000	298940000	338950000	0.86	1.046	0.955	1.07	0.97	1.099	1.155	1.92E-02
P48509	CD151 antigen	CD151	17.8	28.295	18.486	44	6	6	8	6	8	8	7	7	6	6	6	6	6	6	6	6	6	6	6	6	1307600000	1288600000	1218000000	1423100000	1290500000	1615600000	0.963	0.949	0.897	1.049	0.951	1.19	1.134	1.60E-01
P48553	Trafficking protein particle complex subunit 10	TRAPPC10	4.8	142.19	24.565	12	5	5	1	2	2	0	3	4	4	4	2	2	4	4	4	4	2	2	4	4	0	108370000	0	0	150580000	119170000		0.86			1.195	0.945	0.756
P48556	26S proteasome non-ATPase regulatory subunit 8	PSMD8	39.7	39.611	23.962	68	13	13	10	12	11	11	12	12	12	13	12	12	12	12	12	13	12	12	12	12	1144500000	1292000000	1205400000	1255600000	1151000000	1296000000	0.935	1.055	0.985	1.026	0.94	1.059	1.098	7.90E-03
P48634	Protein PRRC2A	PRRC2A	20	228.86	146.98	93	26	26	14	16	14	16	18	15	19	22	20	24	22	22	19	22	20	24	22	22	516180000	574150000	447930000	549940000	520830000	637560000	0.954	1.061	0.828	1.016	0.963	1.178	1.186	5.87E-02
P48637	Glutathione synthetase	GSS	41.1	52.384	70.044	57	16	16	7	9	12	10	7	12	12	14	14	13	13	13	12	14	14	13	13	13	509770000	543650000	482950000	551420000	495480000	514550000	0.987	1.053	0.935	1.068	0.96	0.997	1.082	4.12E-02
P48643	T-complex protein 1 subunit epsilon	CCT5	74.3	59.67	323.31	428	39	39	67	78	66	72	71	74	37	39	37	37	38	38	37	39	37	37	38	38	10966000000	11782000000	11298000000	12047000000	10742000000	12429000000	0.95	1.021	0.979	1.044	0.931	1.077	1.099	1.19E-02
P48651	Phosphatidylserine synthase 1	PTDSS1	18.4	55.527	34.436	32	6	6	4	5	5	6	6	6	4	6	6	6	5	6	4	6	6	6	5	6	169390000	207430000	201470000	226390000	230340000	230330000	0.803	0.984	0.955	1.073	1.092	1.092	1.105	3.31E-01
P48723	Heat shock 70 kDa protein 13	HSPA13	17.2	51.927	20.538	27	7	7	3	7	3	7	4	3	4	7	6	6	6	6	4	7	6	6	6	6	163120000	188870000	141240000	186120000	150370000	193140000	0.957	1.108	0.829	1.092	0.882	1.133	1.249	4.76E-03
P48729	Casein kinase I isoform alpha	CSNK1A1	42.1	38.914	63.466	80	12	11	16	11	13	17	11	12	12	12	12	12	12	12	11	11	11	11	11	11	1032700000	1057400000	1035800000	1008400000	1109900000	1018600000	0.989	1.013	0.992	0.966	1.063	0.976	0.97	3.45E-01
P48730	Casein kinase I isoform delta	CSNK1D	27.2	47.33	14.897	14	9	2	2	2	2	2	3	3	8	8	8	8	9	9	2	2	2	2	2	2	52270000	40522000	47886000	40102000	44077000	49665000	1.142	0.886	1.047	0.876	0.963	1.085	0.903	3.01E-01
P48735	Isocitrate dehydrogenase [NADP], mitochondrial	IDH2	53.8	50.909	121.21	169	23	22	28	30	28	27	30	26	23	23	23	22	23	22	22	22	22	21	22	21	3312700000	3007500000	3238900000	3096200000	3465300000	3170900000	1.03	0.935	1.007	0.963	1.078	0.986	0.926	3.88E-02
P48739	Phosphatidylinositol transfer protein beta isoform	PITPNB	59.8	31.54	44.625	79	13	12	12	11	11	15	15	15	12	13	12	12	13	13	11	12	11	11	12	12	804350000	885880000	811930000	931850000	844870000	859280000	0.939	1.034	0.948	1.088	0.987	1.003	1.088	4.29E-02
P48960	CD97 antigen	CD97	26.6	91.868	162.69	84	13	13	13	13	13	15	12	18	11	12	11	13	12	13	11	12	11	13	12	13	868400000	1040600000	923300000	1027400000	983040000	969890000	0.896	1.074	0.953	1.061	1.015	1.001	1.095	9.10E-02
P49005	DNA polymerase delta subunit 2	POLD2	36.5	51.289	59.984	36	11	11	5	6	8	6	4	7	8	9	10	9	8	10	8	9	10	9	8	10	252540000	220200000	263150000	238050000	256270000	260880000	1.016	0.886	1.059	0.958	1.031	1.05	0.932	2.22E-01
P49006	MARCKS-related protein	MARCKSL1	14.4	19.529	5.6938	4	2	2	2	0	1	0	1	0	2	0	2	1	2	2	2	0	2	1	2	2	50520000	0	72142000	0	62739000	65803000	0.804		1.149		0.999	1.048	1.065
P49023	Paxillin	PXN	28.8	64.505	64.474	43	11	11	7	7	7	8	8	6	9	8	9	9	10	9	9	8	9	9	10	9	262210000	300640000	347350000	287060000	303790000	286980000	0.88	1.009	1.166	0.963	1.019	0.963	0.958	6.33E-01
P49116	Nuclear receptor subfamily 2 group C member 2	NR2C2	8.9	65.414	9.9904	8	5	4	2	2	0	0	3	1	3	3	3	3	4	1	2	3	3	3	4	1	85144000	76997000	101360000	82015000	73675000	0	1.016	0.918	1.209	0.978	0.879		0.917	5.42E-01
P49189	4-trimethylaminobutyraldehyde dehydrogenase	ALDH9A1	42.7	53.801	47.685	95	19	19	16	14	15	18	16	16	18	18	18	18	18	19	18	18	18	18	18	19	1490700000	1492700000	1563100000	1495700000	1510000000	1428000000	0.996	0.997	1.044	0.999	1.009	0.954	0.968	1.87E-01
P49207	60S ribosomal protein L34	RPL34	36.8	13.293	12.591	65	6	6	11	11	10	10	12	11	6	6	6	6	6	6	6	6	6	6	6	6	5726700000	6046000000	5685300000	5746700000	5331700000	6227000000	0.988	1.044	0.981	0.992	0.92	1.075	1.076	8.64E-02
P49247	Ribose-5-phosphate isomerase	RPIA	15.4	33.269	7.8432	6	4	4	0	2	1	1	1	1	3	4	3	4	3	4	3	4	3	4	3	4	56653000	59869000	0	56637000	0	66806000	0.944	0.998		0.944		1.114	1.079
P49257	Protein ERGIC-53	LMAN1	47.8	57.548	191.08	167	18	18	29	28	26	28	33	23	15	17	17	17	18	16	15	17	17	17	18	16	6031600000	4992400000	5872400000	4832600000	5776900000	4753200000	1.122	0.929	1.092	0.899	1.074	0.884	0.825	5.39E-04
P49321	Nuclear autoantigenic sperm protein	NASP	44.9	85.237	251.1	170	25	25	25	31	26	31	27	30	23	25	22	23	22	22	23	25	22	23	22	22	1847500000	1896600000	1887200000	1855200000	1927800000	1909500000	0.979	1.005	1	0.983	1.021	1.012	1	9.89E-01
P49327	Fatty acid synthase	FASN	51.9	273.42	323.31	628	90	90	97	107	100	112	104	108	83	81	87	86	83	85	83	81	87	86	83	85	8254200000	8781900000	8425600000	9088200000	8648100000	9124400000	0.947	1.007	0.966	1.042	0.992	1.046	1.066	2.43E-02
P49354	Protein farnesyltransferase/geranylgeranyltransferase type-1 subunit alpha	FNTA	16.6	44.408	22.682	24	5	5	3	6	3	5	3	4	3	5	3	5	3	5	3	5	3	5	3	5	33398000	55520000	29749000	50682000	32480000	69054000	0.74	1.23	0.659	1.123	0.719	1.53	1.833	9.08E-03
P49366	Deoxyhypusine synthase	DHPS	30.9	40.97	45.58	31	8	8	4	6	5	7	5	4	6	5	7	8	6	7	6	5	7	8	6	7	113530000	115580000	100120000	126340000	102930000	121350000	1.002	1.02	0.884	1.115	0.908	1.071	1.147	3.87E-02
P49368	T-complex protein 1 subunit gamma	CCT3	69.9	60.533	247.99	337	35	35	51	62	53	61	48	62	35	35	34	34	35	34	35	35	34	34	35	34	9539600000	10661000000	9711300000	10724000000	9503500000	11051000000	0.935	1.045	0.952	1.052	0.932	1.084	1.128	8.57E-04
P49406	39S ribosomal protein L19, mitochondrial	MRPL19	40.1	33.535	27.925	53	11	11	8	7	9	7	10	12	9	10	8	9	10	11	9	10	8	9	10	11	1061500000	989730000	1012700000	973910000	1066000000	980750000	1.047	0.976	0.999	0.96	1.051	0.967	0.938	2.09E-02
P49411	Elongation factor Tu, mitochondrial	TUFM	71.2	49.541	323.31	496	31	31	76	87	78	87	81	87	30	30	29	30	29	30	30	30	29	30	29	30	41505000000	38243000000	42683000000	38351000000	40054000000	38855000000	1.039	0.957	1.068	0.96	1.003	0.973	0.929	2.01E-02
P49419	Alpha-aminoadipic semialdehyde dehydrogenase	ALDH7A1	55.8	58.486	124.29	179	23	23	32	30	28	29	28	32	21	20	22	20	22	21	21	20	22	20	22	21	3077800000	2596200000	3105500000	2648800000	3014600000	2623900000	1.082	0.913	1.092	0.931	1.06	0.922	0.856	1.39E-04
P49441	Inositol polyphosphate 1-phosphatase	INPP1	13.5	43.998	18.593	8	3	3	1	1	1	2	1	2	2	2	3	3	2	3	2	2	3	3	2	3	35216000	38346000	34219000	44334000	30133000	37786000	0.96	1.046	0.933	1.209	0.822	1.03	1.21	5.58E-02
P49454	Centromere protein F	CENPF	49.1	367.76	323.31	781	141	140	112	157	105	156	106	145	119	132	115	127	112	128	118	131	114	126	111	127	6574300000	9495400000	6373800000	9336500000	6727400000	9779600000	0.817	1.18	0.792	1.16	0.836	1.215	1.454	5.78E-05
P49458	Signal recognition particle 9 kDa protein	SRP9	53.5	10.112	21.94	34	5	5	8	6	5	5	5	5	5	5	5	5	5	5	5	5	5	5	5	5	1869100000	1529700000	1740400000	1662200000	1898300000	1966300000	1.051	0.861	0.979	0.935	1.068	1.106	0.937	4.46E-01
P49459	Ubiquitin-conjugating enzyme E2 A	UBE2A	17.8	17.315	20.234	18	2	2	4	4	2	3	3	2	2	2	2	2	2	2	2	2	2	2	2	2	199790000	214140000	174550000	201140000	185350000	218630000	1.004	1.076	0.877	1.011	0.932	1.099	1.133	5.14E-02
P49585	Choline-phosphate cytidylyltransferase A	PCYT1A	22.9	41.731	20.114	24	5	5	4	5	5	4	2	4	4	5	5	5	2	4	4	5	5	5	2	4	181220000	216190000	212190000	189000000	182380000	223450000	0.903	1.077	1.057	0.942	0.909	1.113	1.092	2.94E-01
P49588	Alanine--tRNA ligase, cytoplasmic	AARS	58.3	106.81	244.99	249	40	40	41	46	39	44	38	41	36	38	37	37	37	39	36	38	37	37	37	39	3536200000	3741500000	3664100000	3972800000	3478400000	3952900000	0.949	1.005	0.984	1.067	0.934	1.061	1.093	2.32E-02
P49589	Cysteine--tRNA ligase, cytoplasmic	CARS	40.9	85.472	130.29	122	26	26	16	22	20	19	22	23	21	23	23	23	25	24	21	23	23	23	25	24	1106300000	1228400000	1224600000	1259400000	1259000000	1183100000	0.914	1.015	1.012	1.041	1.04	0.978	1.023	6.26E-01
P49590	Probable histidine--tRNA ligase, mitochondrial	HARS2	46.2	56.888	46.301	61	20	13	10	9	8	9	11	14	16	17	18	16	18	19	9	10	11	9	11	12	314430000	381380000	365970000	349540000	355440000	361630000	0.886	1.075	1.032	0.985	1.002	1.019	1.055	3.59E-01
P49591	Serine--tRNA ligase, cytoplasmic	SARS	45.3	58.777	227.1	157	21	21	25	27	24	29	24	28	20	18	18	18	19	20	20	18	18	18	19	20	1510200000	1976600000	1568900000	1913600000	1565300000	1885400000	0.87	1.138	0.903	1.102	0.901	1.086	1.244	3.37E-04
P49642	DNA primase small subunit	PRIM1	23.3	49.901	13.573	19	8	8	4	3	5	3	3	1	8	6	8	4	8	6	8	6	8	4	8	6	108170000	128200000	99791000	165950000	115970000	107360000	0.895	1.06	0.825	1.373	0.959	0.888	1.239	2.19E-01
P49643	DNA primase large subunit	PRIM2	25.9	58.805	27.06	39	10	10	7	7	9	5	8	3	9	9	10	9	10	7	9	9	10	9	10	7	202830000	164240000	233770000	182750000	209970000	147650000	1.066	0.864	1.229	0.961	1.104	0.776	0.765	2.14E-02
P49674	Casein kinase I isoform epsilon	CSNK1E	28.1	47.315	15.484	33	10	3	4	6	6	4	6	7	7	8	6	6	8	8	1	2	0	0	1	1	191760000	199380000	166460000	175820000	209960000	197680000	1.008	1.048	0.875	0.925	1.104	1.039	1.008	9.20E-01
P49711	Transcriptional repressor CTCF	CTCF	27.4	82.785	61.911	66	14	14	10	11	15	9	13	8	11	12	14	10	12	10	11	12	14	10	12	10	558270000	465010000	541330000	422670000	519000000	441700000	1.136	0.946	1.102	0.86	1.056	0.899	0.821	4.48E-03
P49720	Proteasome subunit beta type-3	PSMB3	23.9	22.949	31.787	34	4	4	6	5	7	5	7	4	4	3	4	3	4	3	4	3	4	3	4	3	585280000	617750000	608780000	706050000	506510000	636190000	0.959	1.013	0.998	1.157	0.83	1.043	1.153	1.02E-01
P49721	Proteasome subunit beta type-2	PSMB2	46.3	22.836	55.406	54	9	9	8	10	8	9	10	9	9	9	9	9	9	9	9	9	9	9	9	9	778180000	846660000	820270000	769480000	749870000	955850000	0.949	1.032	1	0.938	0.914	1.166	1.095	2.67E-01
P49736	DNA replication licensing factor MCM2	MCM2	58	101.89	314.16	298	40	40	48	49	52	48	53	48	38	37	37	38	37	37	38	37	37	38	37	37	4444600000	3852000000	4730000000	4101300000	4577500000	3969700000	1.039	0.9	1.105	0.958	1.07	0.928	0.867	5.10E-03
P49748	Very long-chain specific acyl-CoA dehydrogenase, mitochondrial	ACADVL	69.2	70.389	259.57	342	35	35	52	57	55	64	54	60	34	33	34	34	33	34	34	33	34	34	33	34	9084700000	9219500000	9442200000	9274000000	10011000000	9600800000	0.962	0.977	1	0.983	1.061	1.017	0.984	6.42E-01
P49750	YLP motif-containing protein 1	YLPM1	29.3	219.98	205.52	216	44	44	40	33	40	27	38	38	38	38	39	36	39	38	38	38	39	36	39	38	1493800000	1381900000	1606300000	1225500000	1520700000	1335200000	1.047	0.968	1.125	0.859	1.065	0.936	0.853	1.70E-02
P49754	Vacuolar protein sorting-associated protein 41 homolog	VPS41	6.9	98.565	12.236	16	5	5	2	3	3	4	2	2	5	4	5	4	5	4	5	4	5	4	5	4	49371000	49517000	42593000	60158000	55616000	61847000	0.928	0.931	0.801	1.131	1.046	1.163	1.162	2.13E-01
P49755	Transmembrane emp24 domain-containing protein 10	TMED10	35.2	24.976	62.606	123	7	7	22	20	23	19	19	20	7	6	7	6	7	7	7	6	7	6	7	7	2804500000	2942700000	2977200000	3216300000	2964400000	3254900000	0.927	0.972	0.984	1.063	0.979	1.075	1.076	1.20E-01
P49756	RNA-binding protein 25	RBM25	31.6	100.18	211.47	207	26	26	35	38	31	32	36	35	24	24	25	24	25	23	24	24	25	24	25	23	2523700000	2469600000	2540900000	2436800000	2622100000	2456000000	1.006	0.985	1.013	0.972	1.045	0.979	0.958	2.73E-02
P49757	Protein numb homolog	NUMB	30.9	70.803	104.08	68	12	10	13	11	12	10	13	9	11	11	10	10	11	11	9	9	8	8	9	9	638380000	506930000	629790000	573050000	647050000	538020000	1.084	0.861	1.069	0.973	1.099	0.914	0.845	7.38E-03
P49761	Dual specificity protein kinase CLK3	CLK3	10	73.514	17.893	8	4	4	1	1	1	3	2	0	4	3	3	3	4	4	4	3	3	3	4	4	72049000	75834000	76975000	79974000	87659000	96044000	0.885	0.931	0.945	0.982	1.077	1.18	1.064	5.47E-01
P49768	Presenilin-1	PSEN1	4.1	52.667	16.199	11	1	1	1	2	2	3	1	2	1	1	1	1	1	1	1	1	1	1	1	1	0	151290000	155980000	151030000	0	144520000		1.004	1.035	1.002		0.959	0.955
P49770	Translation initiation factor eIF-2B subunit beta	EIF2B2	19.7	38.989	30.555	30	5	5	5	6	3	6	5	5	4	5	4	5	3	3	4	5	4	5	3	3	201190000	183010000	233390000	218700000	227760000	151020000	0.993	0.904	1.152	1.08	1.125	0.746	0.835	1.71E-01
P49773	Histidine triad nucleotide-binding protein 1	HINT1	74.6	13.802	89.889	66	7	7	13	14	9	11	7	12	7	7	7	7	7	7	7	7	7	7	7	7	1029800000	1202600000	1018400000	1302000000	943910000	1098800000	0.937	1.094	0.926	1.184	0.859	1	1.204	3.43E-02
P49790	Nuclear pore complex protein Nup153	NUP153	35.2	153.94	175.66	170	35	35	33	25	29	27	32	24	33	30	28	29	31	30	33	30	28	29	31	30	1578000000	1365100000	1642400000	1458400000	1632500000	1359900000	1.048	0.906	1.091	0.968	1.084	0.903	0.862	4.10E-03
P49792	E3 SUMO-protein ligase RanBP2	RANBP2	49.3	358.2	323.31	596	114	80	100	92	106	100	103	95	101	100	104	101	98	101	69	69	72	70	67	70	6422100000	5753900000	6463600000	5690500000	6287400000	5898800000	1.055	0.945	1.062	0.935	1.033	0.969	0.905	1.70E-03
P49821	NADH dehydrogenase [ubiquinone] flavoprotein 1, mitochondrial	NDUFV1	51.7	50.817	93.813	104	17	17	18	21	16	15	17	17	16	16	17	17	16	17	16	16	17	17	16	17	1413200000	1308600000	1403600000	1416500000	1483100000	1261200000	1.023	0.948	1.016	1.026	1.074	0.913	0.927	1.16E-01
P49840	Glycogen synthase kinase-3 alpha	GSK3A	18.4	50.98	22.083	30	6	4	6	7	5	5	5	2	6	6	6	6	6	5	4	4	4	4	4	3	122330000	156200000	130790000	125340000	143840000	155760000	0.88	1.123	0.941	0.901	1.034	1.12	1.102	3.24E-01
P49841	Glycogen synthase kinase-3 beta	GSK3B	13.8	46.744	13.154	10	5	3	2	2	0	2	2	2	5	5	5	5	5	5	3	3	3	3	3	3	55804000	56194000	60057000	45145000	41725000	75563000	1.001	1.008	1.077	0.81	0.748	1.355	1.123	5.72E-01
P49848	Transcription initiation factor TFIID subunit 6	TAF6	29.8	72.668	84.637	42	14	14	4	6	6	12	7	7	10	12	10	12	11	11	10	12	10	12	11	11	242920000	292630000	286940000	283140000	239260000	238440000	0.921	1.109	1.087	1.073	0.907	0.904	1.059	5.44E-01
P49902	Cytosolic purine 5'-nucleotidase	NT5C2	23.2	64.969	41.846	29	9	9	5	4	4	4	6	6	8	8	5	9	7	6	8	8	5	9	7	6	239580000	226450000	253000000	267960000	265400000	231160000	0.969	0.916	1.023	1.084	1.073	0.935	0.957	5.14E-01
P49903	Selenide, water dikinase 1	SEPHS1	28.1	42.91	25.577	33	7	7	7	6	8	4	4	4	7	6	7	6	7	5	7	6	7	6	7	5	230030000	253180000	229940000	276900000	269430000	250360000	0.914	1.006	0.914	1.1	1.071	0.995	1.07	3.37E-01
P49914	5-formyltetrahydrofolate cyclo-ligase	MTHFS	35	23.255	16.116	16	5	5	4	2	2	3	2	3	4	4	3	5	4	5	4	4	3	5	4	5	161080000	155830000	132670000	203160000	157140000	152810000	1.004	0.971	0.827	1.266	0.979	0.952	1.135	3.36E-01
P49915	GMP synthase [glutamine-hydrolyzing]	GMPS	60.6	76.715	117.41	153	28	28	25	25	29	26	26	22	25	24	25	26	26	25	25	24	25	26	26	25	1885000000	1994900000	1971000000	1957400000	2191300000	2199400000	0.927	0.981	0.969	0.963	1.078	1.082	1.017	7.83E-01
P49916	DNA ligase 3	LIG3	24.2	112.91	104.99	75	20	20	12	12	15	12	13	11	15	18	19	16	18	17	15	18	19	16	18	17	385860000	414040000	408160000	413760000	419290000	389760000	0.952	1.022	1.007	1.021	1.035	0.962	1.004	9.17E-01
P49959	Double-strand break repair protein MRE11A	MRE11A	44.8	80.592	136.27	137	24	24	26	22	23	24	24	18	23	22	24	23	23	22	23	22	24	23	23	22	1389900000	1424300000	1446000000	1569400000	1391800000	1505200000	0.956	0.979	0.994	1.079	0.957	1.035	1.064	1.20E-01
P50148	Guanine nucleotide-binding protein G(q) subunit alpha	GNAQ	53.8	42.142	67.968	92	16	10	15	15	14	14	16	18	15	15	15	16	14	15	9	9	9	10	9	10	1773600000	1652900000	1928700000	1581700000	1847200000	1639400000	1.021	0.951	1.11	0.91	1.063	0.944	0.878	1.07E-02
P50150	Guanine nucleotide-binding protein G(I)/G(S)/G(O) subunit gamma-4	GNG4	44	8.3887	13.65	12	2	2	3	2	2	1	2	2	2	2	2	2	2	2	2	2	2	2	2	2	272820000	257850000	258580000	241900000	279400000	217410000	1.071	1.013	1.015	0.95	1.097	0.854	0.885	7.83E-02
P50151	Guanine nucleotide-binding protein G(I)/G(S)/G(O) subunit gamma-10	GNG10	64.7	7.2053	20.792	15	3	3	3	2	2	3	3	2	3	2	3	3	3	3	3	2	3	3	3	3	213030000	98688000	225760000	112800000	200140000	137690000	1.294	0.599	1.371	0.685	1.215	0.836	0.547	2.08E-03
P50213	Isocitrate dehydrogenase [NAD] subunit alpha, mitochondrial	IDH3A	46.2	39.591	88.504	131	15	15	22	22	20	21	23	23	13	14	13	13	14	13	13	14	13	13	14	13	4236000000	3779600000	4143200000	3793700000	3924500000	3842000000	1.072	0.956	1.048	0.96	0.993	0.972	0.928	3.48E-02
P50281	Matrix metalloproteinase-14	MMP14	24.2	65.893	48.95	56	11	11	12	8	6	9	10	11	10	10	9	8	10	8	10	10	9	8	10	8	665830000	529910000	643030000	542240000	680520000	574670000	1.099	0.874	1.061	0.895	1.123	0.948	0.828	2.70E-03
P50336	Protoporphyrinogen oxidase	PPOX	14	50.765	14.819	9	5	5	2	0	1	0	3	3	4	4	3	3	4	4	4	4	3	3	4	4	129530000	88283000	92218000	82006000	120560000	69895000	1.334	0.909	0.95	0.845	1.242	0.72	0.702	5.25E-02
P50395	Rab GDP dissociation inhibitor beta	GDI2	74.6	50.663	232.32	266	28	21	45	48	40	47	41	45	26	27	28	27	27	26	19	20	21	20	20	19	6575000000	7831000000	6975500000	7645300000	6616700000	8160100000	0.901	1.073	0.955	1.047	0.906	1.118	1.172	4.20E-03
P50402	Emerin	EMD	68.5	28.994	133.53	184	16	16	33	29	30	28	34	30	15	15	15	15	16	15	15	15	15	15	16	15	3768100000	3172900000	3472000000	3483800000	3223400000	3024100000	1.122	0.945	1.034	1.038	0.96	0.901	0.925	2.77E-01
P50416	Carnitine O-palmitoyltransferase 1, liver isoform	CPT1A	26	88.367	57.889	68	17	17	10	13	12	12	10	11	15	15	16	14	16	13	15	15	16	14	16	13	381260000	337160000	421680000	322610000	393870000	346180000	1.038	0.918	1.149	0.879	1.073	0.943	0.841	9.88E-03
P50454	Serpin H1	SERPINH1	63.2	46.44	185.93	227	21	21	42	40	34	35	34	42	20	19	20	19	19	20	20	19	20	19	19	20	14440000000	12943000000	14281000000	12833000000	14323000000	14146000000	1.044	0.936	1.033	0.928	1.036	1.023	0.927	1.33E-01
P50502	Hsc70-interacting protein	ST13	27.4	41.331	27.286	69	9	9	9	13	8	13	12	14	8	9	8	9	8	9	8	9	8	9	8	9	1403900000	1688200000	1391300000	1670900000	1332600000	1649400000	0.922	1.109	0.914	1.097	0.875	1.083	1.213	2.83E-04
P50552	Vasodilator-stimulated phosphoprotein	VASP	40.3	39.829	66.656	91	14	14	13	14	14	18	15	17	14	14	14	14	14	14	14	14	14	14	14	14	855170000	874350000	819670000	859100000	858430000	978090000	0.978	1	0.938	0.983	0.982	1.119	1.07	2.06E-01
P50570	Dynamin-2	DNM2	29.4	98.063	59.487	97	22	22	19	15	16	14	17	16	21	19	20	19	20	19	21	19	20	19	20	19	597450000	697230000	627000000	710200000	597920000	727440000	0.906	1.057	0.951	1.077	0.907	1.103	1.171	1.36E-03
P50579	Methionine aminopeptidase 2	METAP2	55.6	52.891	206.13	119	17	17	21	19	22	18	21	18	15	16	15	16	15	16	15	16	15	16	15	16	1077400000	1066600000	1044800000	1046000000	1061700000	1149500000	1.003	0.993	0.973	0.974	0.988	1.07	1.025	4.74E-01
P50613	Cyclin-dependent kinase 7	CDK7	39.6	39.038	15.505	30	10	9	5	6	4	4	8	3	8	9	10	8	9	6	7	9	9	8	8	5	307700000	262400000	308610000	227360000	313390000	235190000	1.116	0.952	1.119	0.824	1.136	0.853	0.78	3.16E-03
P50748	Kinetochore-associated protein 1	KNTC1	8.3	250.75	27.557	34	14	14	6	5	6	7	5	5	10	11	12	11	13	12	10	11	12	11	13	12	206040000	265360000	257980000	249570000	218220000	214240000	0.876	1.128	1.097	1.061	0.928	0.911	1.069	5.12E-01
P50750	Cyclin-dependent kinase 9	CDK9	33.3	42.777	76.087	46	10	9	10	6	6	10	6	8	10	9	8	10	9	10	9	8	7	9	8	9	521980000	543470000	538870000	595440000	484390000	553230000	0.967	1.007	0.999	1.104	0.898	1.025	1.095	9.68E-02
P50851	Lipopolysaccharide-responsive and beige-like anchor protein	LRBA	3.9	319.1	17.208	16	10	8	3	3	2	3	2	3	8	8	7	8	8	10	7	6	6	7	6	8	154120000	150790000	195590000	160630000	183300000	169670000	0.912	0.892	1.157	0.95	1.085	1.004	0.903	2.68E-01
P50895	Basal cell adhesion molecule	BCAM	45.1	67.404	185.83	140	18	18	25	22	23	23	24	23	17	16	17	15	17	15	17	16	17	15	17	15	2601700000	1967700000	2399000000	2045200000	2342100000	2192500000	1.152	0.871	1.062	0.906	1.037	0.971	0.845	2.10E-02
P50897	Palmitoyl-protein thioesterase 1	PPT1	47.1	34.193	101.76	115	11	11	20	20	18	21	18	18	11	11	11	11	11	11	11	11	11	11	11	11	3205200000	2618400000	3362700000	2684800000	2980000000	2637700000	1.1	0.898	1.154	0.921	1.022	0.905	0.832	8.98E-03
P50914	60S ribosomal protein L14	RPL14	31.2	23.432	30.366	77	7	7	11	15	12	15	11	13	6	7	7	7	7	6	6	7	7	7	7	6	4003200000	4558800000	4410000000	4748100000	4450000000	4538600000	0.899	1.024	0.991	1.067	1	1.02	1.076	1.06E-01
P50990	T-complex protein 1 subunit theta	CCT8	78.5	59.62	174.93	419	39	39	67	73	66	76	68	69	38	36	39	37	37	35	38	36	39	37	37	35	13598000000	14492000000	13713000000	14579000000	13628000000	14532000000	0.965	1.029	0.973	1.035	0.967	1.031	1.065	3.57E-05
P50991	T-complex protein 1 subunit delta	CCT4	69	57.924	252.79	283	33	33	42	49	44	50	45	53	32	32	31	31	32	31	32	32	31	31	32	31	9991900000	10517000000	10591000000	11421000000	11027000000	11845000000	0.917	0.965	0.972	1.048	1.012	1.087	1.069	2.16E-01
P50995	Annexin A11	ANXA11	38	54.389	171.78	123	18	18	18	22	19	24	19	21	17	18	18	18	18	18	17	18	18	18	18	18	1401700000	2479100000	1410200000	2273500000	1372600000	2351200000	0.745	1.318	0.75	1.208	0.73	1.25	1.698	9.52E-05
P51003	Poly(A) polymerase alpha	PAPOLA	7.7	82.842	11.995	14	5	4	2	5	2	2	1	2	3	5	4	4	4	4	2	4	3	3	3	3	76874000	88403000	102450000	78372000	105410000	86474000	0.857	0.986	1.143	0.874	1.176	0.964	0.889	3.34E-01
P51114	Fragile X mental retardation syndrome-related protein 1	FXR1	51.4	69.72	296.23	191	26	24	31	31	30	33	33	33	20	22	22	22	21	21	18	20	20	20	19	19	3508000000	3776600000	3218400000	3938900000	3426900000	4077100000	0.959	1.033	0.88	1.077	0.937	1.115	1.161	1.11E-02
P51116	Fragile X mental retardation syndrome-related protein 2	FXR2	34.3	74.222	138.7	109	17	14	17	19	18	18	20	17	14	16	16	15	16	16	11	13	13	12	13	13	814120000	940920000	800500000	910450000	839390000	902770000	0.938	1.084	0.922	1.049	0.967	1.04	1.122	3.56E-03
P51148	Ras-related protein Rab-5C	RAB5C	71.8	23.482	106.61	109	10	7	19	15	23	16	20	16	10	10	10	9	10	10	7	7	7	6	7	7	3869100000	1660900000	3707200000	1797300000	3548500000	1853200000	1.412	0.606	1.353	0.656	1.295	0.677	0.477	5.91E-05
P51149	Ras-related protein Rab-7a	RAB7A	76.3	23.489	185.57	173	15	15	30	26	31	25	30	31	15	15	15	15	15	15	15	15	15	15	15	15	9967700000	5820500000	9767200000	5992600000	10418000000	5741900000	1.254	0.732	1.228	0.754	1.31	0.722	0.582	3.72E-05
P51151	Ras-related protein Rab-9A	RAB9A	33.3	22.837	46.08	30	5	5	5	4	7	4	7	3	5	5	5	4	5	5	5	5	5	4	5	5	474090000	236020000	404130000	234300000	479660000	189690000	1.41	0.702	1.202	0.697	1.426	0.564	0.486	1.26E-03
P51153	Ras-related protein Rab-13	RAB13	43.3	22.774	24.289	18	8	6	4	0	5	3	4	2	8	4	7	5	7	4	6	2	5	3	5	2	443580000	173690000	477870000	152370000	475830000	156410000	1.416	0.554	1.525	0.486	1.519	0.499	0.345	1.95E-05
P51159	Ras-related protein Rab-27A	RAB27A	24.4	24.868	7.6676	13	5	4	3	1	3	2	4	0	5	3	5	4	5	3	4	2	4	3	4	2	116790000	62124000	93839000	54764000	84806000	49489000	1.517	0.807	1.219	0.712	1.102	0.643	0.563	1.35E-02
P51398	28S ribosomal protein S29, mitochondrial	DAP3	54.5	45.566	116.11	136	18	18	22	25	24	22	25	18	18	15	18	17	18	17	18	15	18	17	18	17	2587300000	2304000000	2474200000	2463700000	2459000000	2296300000	1.064	0.948	1.018	1.014	1.012	0.945	0.939	8.86E-02
P51452	Dual specificity protein phosphatase 3	DUSP3	33.5	20.478	7.5177	14	5	5	1	4	1	2	3	3	4	5	5	2	4	5	4	5	5	2	4	5	77443000	86278000	82167000	94081000	99658000	92188000	0.874	0.973	0.927	1.061	1.124	1.04	1.051	5.70E-01
P51531	Probable global transcription activator SNF2L2	SMARCA2	18.1	181.28	21.906	19	23	10	3	2	2	4	4	4	21	20	22	19	22	18	9	8	10	8	10	7	178950000	136370000	182060000	146100000	156060000	127630000	1.158	0.882	1.178	0.945	1.01	0.826	0.793	2.19E-02
P51532	Transcription activator BRG1	SMARCA4	27.5	184.64	193.42	219	38	25	38	35	34	37	40	35	34	36	36	34	37	32	22	24	24	23	25	21	1815200000	1602700000	1837800000	1552900000	1726400000	1655700000	1.069	0.944	1.082	0.914	1.016	0.975	0.894	1.37E-02
P51553	Isocitrate dehydrogenase [NAD] subunit gamma, mitochondrial	IDH3G	43.8	42.794	94.514	99	11	11	18	16	16	16	16	17	11	10	10	10	11	11	11	10	10	10	11	11	1197300000	1049400000	1248700000	1038000000	1250100000	1070800000	1.048	0.919	1.093	0.909	1.094	0.937	0.854	8.36E-04
P51570	Galactokinase	GALK1	12.5	42.272	7.1676	6	4	4	2	1	0	1	1	1	4	2	3	3	2	1	4	2	3	3	2	1	26952000	0	42947000	56483000	0	0	0.64		1.019	1.341			1.616
P51571	Translocon-associated protein subunit delta	SSR4	36.4	18.998	41.382	62	5	5	12	9	11	9	8	13	5	5	5	5	5	5	5	5	5	5	5	5	2665000000	2164900000	2915400000	2068800000	2847700000	2049600000	1.087	0.883	1.189	0.844	1.161	0.836	0.746	9.96E-04
P51572	B-cell receptor-associated protein 31	BCAP31	43.5	27.991	58.474	130	13	13	22	22	21	23	20	22	13	12	13	12	12	12	13	12	13	12	12	12	5427500000	5240800000	6100900000	4101100000	6246400000	4772900000	1.021	0.986	1.148	0.772	1.175	0.898	0.794	4.27E-02
P51608	Methyl-CpG-binding protein 2	MECP2	14.6	52.44	14.977	19	5	5	4	4	4	2	4	1	5	5	5	5	5	4	5	5	5	5	5	4	73570000	69282000	93889000	93506000	114220000	77002000	0.846	0.797	1.08	1.076	1.314	0.886	0.851	3.67E-01
P51610	Host cell factor 1	HCFC1	28.8	208.73	233.82	229	40	39	37	46	33	36	39	38	36	37	37	35	37	36	35	36	36	34	36	35	2279600000	2406900000	2211300000	2310400000	2358200000	2326600000	0.984	1.039	0.955	0.998	1.018	1.005	1.028	2.79E-01
P51636	Caveolin-2	CAV2	52.5	18.291	44.253	42	5	5	6	7	8	8	8	5	5	5	5	5	5	5	5	5	5	5	5	5	991370000	1019000000	1060100000	1064600000	1141500000	659670000	1.002	1.03	1.071	1.076	1.154	0.667	0.859	3.30E-01
P51648	Fatty aldehyde dehydrogenase	ALDH3A2	36.9	54.847	89.19	141	18	17	22	23	25	23	23	25	18	17	18	18	18	17	17	16	17	17	17	16	3007300000	2617100000	2989000000	2709200000	3147700000	2757800000	1.047	0.911	1.041	0.944	1.096	0.96	0.884	5.54E-03
P51659	Peroxisomal multifunctional enzyme type 2	HSD17B4	59	79.685	286.19	327	36	36	53	59	51	56	51	57	34	34	34	34	35	33	34	34	34	34	35	33	7712600000	7004500000	7776500000	7144300000	7706300000	6886100000	1.046	0.95	1.055	0.969	1.045	0.934	0.907	7.61E-04
P51665	26S proteasome non-ATPase regulatory subunit 7	PSMD7	54.6	37.025	142.54	97	12	12	14	17	17	18	14	17	11	12	11	12	11	11	11	12	11	12	11	11	2277800000	2200200000	2173100000	2396600000	2204700000	2503900000	0.993	0.96	0.948	1.045	0.962	1.092	1.067	1.90E-01
P51688	N-sulphoglucosamine sulphohydrolase	SGSH	14.1	56.695	10.329	10	4	4	1	2	1	2	3	1	2	4	3	3	3	3	2	4	3	3	3	3	73577000	74331000	64208000	89525000	89173000	70199000	0.958	0.967	0.836	1.165	1.161	0.914	1.031	8.13E-01
P51784	Ubiquitin carboxyl-terminal hydrolase 11	USP11	12.5	109.82	46.309	27	8	7	5	5	4	3	3	7	7	5	6	6	5	7	6	5	6	6	5	6	225210000	191950000	198650000	166430000	187380000	186040000	1.169	0.997	1.031	0.864	0.973	0.966	0.891	1.77E-01
P51790	H(+)/Cl(-) exchange transporter 3	CLCN3	5	90.965	10.742	17	3	2	3	2	3	3	3	3	3	3	3	3	3	3	2	2	2	2	2	2	54329000	53536000	57745000	50137000	42941000	45245000	1.073	1.057	1.14	0.99	0.848	0.893	0.961	7.10E-01
P51798	H(+)/Cl(-) exchange transporter 7	CLCN7	5.7	88.678	9.8237	12	4	4	4	1	2	1	2	2	4	4	3	4	4	4	4	4	3	4	4	4	62910000	51761000	77964000	55691000	64388000	59336000	1.015	0.835	1.257	0.898	1.038	0.957	0.813	7.16E-02
P51809	Vesicle-associated membrane protein 7	VAMP7	51.4	24.935	38.002	59	10	10	11	12	10	10	7	9	10	10	9	10	9	9	10	10	9	10	9	9	696690000	754990000	781360000	754300000	781000000	666230000	0.943	1.022	1.057	1.021	1.057	0.901	0.963	5.32E-01
P51812	Ribosomal protein S6 kinase alpha-3	RPS6KA3	21.2	83.735	40.782	70	14	9	10	12	14	10	14	10	13	13	13	14	14	13	9	8	9	9	9	8	483940000	497770000	489110000	479350000	532330000	541240000	0.96	0.988	0.971	0.951	1.056	1.074	1.009	8.65E-01
P51828	Adenylate cyclase type 7	ADCY7	6.7	120.31	15.399	6	4	4	1	1	2	0	1	1	3	2	3	3	2	3	3	2	3	3	2	3	37248000	0	39065000	39876000	0	42021000	0.942		0.988	1.008		1.062	1.073	1.85E-01
P51858	Hepatoma-derived growth factor	HDGF	44.2	26.788	118.79	71	10	9	11	15	10	13	10	12	10	10	10	10	10	10	9	9	9	9	9	9	1972600000	2292900000	1811800000	2016200000	1890000000	2138700000	0.976	1.135	0.897	0.998	0.935	1.059	1.136	4.95E-02
P51946	Cyclin-H	CCNH	21.1	37.643	14.899	19	5	5	5	2	5	2	4	1	5	3	5	2	4	3	5	3	5	2	4	3	98320000	88514000	106180000	106310000	106170000	88502000	0.993	0.894	1.073	1.074	1.072	0.894	0.912	2.33E-01
P51948	CDK-activating kinase assembly factor MAT1	MNAT1	35.9	35.823	50.643	32	7	7	4	6	5	6	5	6	5	7	6	6	5	7	5	7	6	6	5	7	249430000	159700000	241940000	175260000	265760000	160530000	1.195	0.765	1.159	0.839	1.273	0.769	0.654	5.43E-04
P51965	Ubiquitin-conjugating enzyme E2 E1	UBE2E1	32.1	21.404	12.409	28	5	2	4	5	6	6	4	3	5	5	5	5	5	5	2	2	2	2	2	2	265810000	275630000	245880000	285900000	218490000	282960000	1.013	1.05	0.937	1.089	0.833	1.078	1.157	5.35E-02
P51970	NADH dehydrogenase [ubiquinone] 1 alpha subcomplex subunit 8	NDUFA8	72.1	20.105	84.648	77	10	10	16	12	13	9	15	12	10	10	10	10	10	10	10	10	10	10	10	10	2035800000	1906800000	2086300000	1890600000	1978600000	1866200000	1.038	0.973	1.064	0.964	1.009	0.952	0.928	1.19E-02
P51991	Heterogeneous nuclear ribonucleoprotein A3	HNRNPA3	45.8	39.594	185.26	322	19	17	52	58	52	54	52	54	19	19	19	19	19	17	17	17	17	17	17	16	22528000000	18330000000	21724000000	18399000000	20842000000	18838000000	1.12	0.911	1.08	0.915	1.036	0.937	0.854	3.44E-03
P52209	6-phosphogluconate dehydrogenase, decarboxylating	PGD	39.8	53.139	98.635	87	13	13	13	20	12	12	13	17	13	12	12	12	13	12	13	12	12	12	13	12	774730000	820410000	665970000	754640000	770950000	797690000	1.014	1.074	0.872	0.988	1.009	1.044	1.073	2.56E-01
P52272	Heterogeneous nuclear ribonucleoprotein M	HNRNPM	76.7	77.515	232.91	455	48	48	75	76	76	77	82	69	48	46	47	44	45	46	48	46	47	44	45	46	17455000000	14992000000	18211000000	14580000000	18252000000	14830000000	1.065	0.915	1.111	0.89	1.114	0.905	0.824	3.77E-04
P52292	Importin subunit alpha-1	KPNA2	51	57.861	186.17	139	18	18	23	23	22	26	23	22	17	16	17	17	18	17	17	16	17	17	18	17	1985700000	2130000000	1970200000	2184700000	1962300000	2161700000	0.961	1.031	0.954	1.058	0.95	1.046	1.094	4.21E-04
P52294	Importin subunit alpha-5	KPNA1	31.8	60.221	99.898	75	13	9	14	12	13	12	13	11	10	10	10	10	11	11	7	6	7	6	7	7	717020000	688360000	715480000	656500000	616740000	707010000	1.049	1.007	1.047	0.96	0.902	1.034	1.001	9.82E-01
P52298	Nuclear cap-binding protein subunit 2	NCBP2	17.3	18.001	14.268	21	3	3	3	3	3	5	3	4	3	3	3	3	3	3	3	3	3	3	3	3	541670000	404700000	610730000	436130000	479560000	428060000	1.12	0.837	1.263	0.902	0.992	0.885	0.778	3.62E-02
P52306	Rap1 GTPase-GDP dissociation stimulator 1	RAP1GDS1	11.5	66.316	13.219	13	5	5	1	3	3	2	2	2	3	5	4	3	4	3	3	5	4	3	4	3	80889000	66570000	72518000	81636000	69783000	80303000	1.074	0.884	0.963	1.084	0.927	1.067	1.024	7.77E-01
P52434	DNA-directed RNA polymerases I, II, and III subunit RPABC3	POLR2H	67.3	17.143	51.386	47	7	7	8	8	7	9	6	9	6	7	7	7	6	6	6	7	7	7	6	6	1245900000	1043900000	1193300000	981470000	1076300000	1068300000	1.131	0.948	1.083	0.891	0.977	0.97	0.88	6.73E-02
P52565	Rho GDP-dissociation inhibitor 1	ARHGDIA	73.5	23.207	108.58	108	12	12	11	18	19	23	16	21	10	12	10	12	10	12	10	12	10	12	10	12	1422000000	1931600000	1636300000	2045800000	1672700000	2274200000	0.777	1.055	0.894	1.118	0.914	1.242	1.321	1.65E-02
P52566	Rho GDP-dissociation inhibitor 2	ARHGDIB	14.4	22.988	2.2399	8	3	3	1	1	3	1	1	1	3	2	3	2	2	2	3	2	3	2	2	2	68304000	37905000	51439000	44455000	44747000	30238000	1.479	0.821	1.114	0.963	0.969	0.655	0.685	1.00E-01
P52594	Arf-GAP domain and FG repeat-containing protein 1	AGFG1	23.1	58.259	68.064	34	8	8	6	5	5	6	5	7	5	6	6	6	5	8	5	6	6	6	5	8	376490000	388510000	391910000	364570000	405510000	371380000	0.983	1.014	1.023	0.952	1.059	0.97	0.958	2.08E-01
P52597	Heterogeneous nuclear ribonucleoprotein F	HNRNPF	66	45.671	252.48	298	17	15	40	55	53	52	51	47	17	17	17	16	17	16	15	15	15	14	15	14	8074100000	8635800000	8264400000	8673400000	8882000000	8478500000	0.95	1.016	0.972	1.02	1.045	0.997	1.022	4.93E-01
P52630	Signal transducer and activator of transcription 2	STAT2	7.4	97.915	17.195	11	4	4	3	2	2	2	1	1	2	2	2	4	2	2	2	2	2	4	2	2	45500000	0	39469000	42743000	0	44842000	1.055		0.915	0.991		1.039	1.031	7.22E-01
P52657	Transcription initiation factor IIA subunit 2	GTF2A2	14.7	12.457	3.56	6	2	2	2	1	1	1	1	0	2	2	2	2	1	2	2	2	2	2	1	2	67077000	71114000	73497000	87187000	0	78270000	0.889	0.943	0.974	1.156		1.038	1.122	2.77E-01
P52701	DNA mismatch repair protein Msh6	MSH6	19.9	152.78	71.481	94	22	22	14	17	16	15	15	17	20	19	21	20	22	21	20	19	21	20	22	21	784250000	744620000	846050000	808920000	788370000	900220000	0.966	0.917	1.042	0.996	0.971	1.109	1.015	8.24E-01
P52732	Kinesin-like protein KIF11	KIF11	19.9	119.16	83.068	64	15	15	9	9	13	11	10	12	13	11	12	10	12	13	13	11	12	10	12	13	272370000	297620000	221050000	278440000	221200000	270980000	1.046	1.143	0.849	1.07	0.85	1.041	1.185	7.91E-02
P52735	Guanine nucleotide exchange factor VAV2	VAV2	8.9	101.29	5.3437	5	5	5	0	2	1	1	0	1	2	3	4	3	4	2	2	3	4	3	4	2	0	34303000	0	0	27325000	0		1.113			0.887		1.255
P52756	RNA-binding protein 5	RBM5	11.5	92.153	21.495	26	8	7	4	4	5	4	4	5	8	6	8	8	7	8	7	5	7	7	6	7	154430000	173440000	160660000	167370000	150430000	156290000	0.963	1.081	1.001	1.043	0.938	0.974	1.068	1.46E-01
P52788	Spermine synthase	SMS	66.9	41.268	160.5	114	18	18	14	22	17	24	16	21	17	16	16	17	16	18	17	16	16	17	16	18	1811700000	2405100000	1871300000	2378200000	1876300000	2252900000	0.863	1.146	0.891	1.133	0.894	1.073	1.266	6.59E-04
P52789	Hexokinase-2	HK2	52.6	102.38	161.92	218	37	33	37	36	33	43	32	37	34	34	33	34	34	36	30	30	29	30	30	32	2090700000	2884000000	2261700000	2783100000	2277700000	2885200000	0.826	1.14	0.894	1.1	0.9	1.14	1.29	7.39E-04
P52815	39S ribosomal protein L12, mitochondrial	MRPL12	47	21.348	19.12	62	7	7	9	12	9	11	10	11	7	7	7	7	7	7	7	7	7	7	7	7	3712100000	4048800000	4548000000	3679800000	4593400000	3782900000	0.914	0.997	1.12	0.906	1.131	0.932	0.896	2.19E-01
P52888	Thimet oligopeptidase	THOP1	25.5	78.839	44.353	41	14	14	6	7	10	6	6	6	11	11	12	10	11	11	11	11	12	10	11	11	192220000	206020000	225770000	225750000	199220000	257530000	0.883	0.946	1.037	1.037	0.915	1.183	1.117	2.56E-01
P52907	F-actin-capping protein subunit alpha-1	CAPZA1	69.2	32.922	130.31	115	12	10	18	23	18	18	14	24	12	12	11	12	11	12	10	10	9	10	9	10	2209000000	2477500000	2042100000	2592100000	2047600000	2603700000	0.949	1.064	0.877	1.113	0.879	1.118	1.218	2.52E-03
P52943	Cysteine-rich protein 2	CRIP2	45.7	22.492	25.257	20	4	4	2	4	5	4	3	2	2	4	4	3	4	3	2	4	4	3	4	3	180470000	189600000	168330000	152970000	119570000	138140000	1.141	1.199	1.064	0.967	0.756	0.873	1.026	8.73E-01
P52948	Nuclear pore complex protein Nup98-Nup96	NUP98	40	197.58	314.69	354	56	56	59	63	61	58	58	55	53	52	53	52	55	51	53	52	53	52	55	51	4356000000	3677400000	4540200000	3675100000	4677900000	3582600000	1.066	0.9	1.111	0.9	1.145	0.877	0.806	8.62E-04
P53004	Biliverdin reductase A	BLVRA	34.5	33.428	40.073	46	8	8	8	8	7	7	7	9	7	8	7	7	7	8	7	8	7	7	7	8	321290000	331520000	318060000	328010000	340130000	322210000	0.983	1.014	0.973	1.003	1.041	0.986	1.002	9.24E-01
P53007	Tricarboxylate transport protein, mitochondrial	SLC25A1	41.5	34.012	30.376	66	12	12	10	11	10	12	9	14	10	12	12	11	12	12	10	12	12	11	12	12	1415200000	1333100000	1512700000	1435200000	1395600000	1301300000	1.012	0.953	1.081	1.026	0.998	0.93	0.941	1.94E-01
P53041	Serine/threonine-protein phosphatase 5	PPP5C	23	56.878	44.075	27	8	8	5	3	4	6	5	4	8	8	8	8	8	8	8	8	8	8	8	8	309170000	351930000	298500000	349850000	309410000	337740000	0.948	1.079	0.915	1.073	0.949	1.036	1.134	2.02E-03
P53350	Serine/threonine-protein kinase PLK1	PLK1	10.9	68.254	15.899	22	4	4	5	3	3	4	4	3	4	3	3	3	4	3	4	3	3	3	4	3	84592000	70399000	65567000	76046000	71511000	92723000	1.101	0.917	0.854	0.99	0.931	1.207	1.079	5.41E-01
P53365	Arfaptin-2	ARFIP2	33.4	37.855	73.917	46	9	9	8	7	7	8	7	9	8	8	8	8	8	8	8	8	8	8	8	8	382940000	432620000	370190000	453680000	431420000	413120000	0.925	1.045	0.894	1.096	1.042	0.998	1.097	1.57E-01
P53367	Arfaptin-1	ARFIP1	32.4	41.738	71.74	39	8	8	8	6	7	7	5	6	6	7	6	8	7	7	6	7	6	8	7	7	294280000	273900000	246900000	301510000	271940000	329290000	1.028	0.957	0.862	1.053	0.95	1.15	1.113	2.21E-01
P53396	ATP-citrate synthase	ACLY	44.5	120.84	150.65	215	40	40	37	36	34	36	39	33	36	35	35	33	35	34	36	35	35	33	35	34	2185400000	2223100000	2235300000	2449200000	2181400000	2321700000	0.964	0.981	0.986	1.081	0.963	1.025	1.059	1.26E-01
P53582	Methionine aminopeptidase 1	METAP1	51.3	43.215	81.988	65	12	12	12	11	11	10	11	10	10	10	11	9	10	9	10	10	11	9	10	9	914160000	934750000	914120000	818010000	879280000	926310000	1.018	1.041	1.018	0.911	0.979	1.032	0.989	8.21E-01
P53597	Succinate--CoA ligase [ADP/GDP-forming] subunit alpha, mitochondrial	SUCLG1	35.3	36.249	75.12	80	9	9	14	15	14	12	13	12	9	9	9	9	9	8	9	9	9	9	9	8	1453500000	1283100000	1510200000	1223600000	1508700000	1208500000	1.065	0.94	1.107	0.897	1.106	0.886	0.831	1.02E-03
P53611	Geranylgeranyl transferase type-2 subunit beta	RABGGTB	9.1	36.924	10.42	8	3	3	1	2	1	2	2	0	2	3	2	3	3	3	2	3	2	3	3	3	0	0	0	54594000	34804000	16601000				1.545	0.985	0.47	1.023
P53618	Coatomer subunit beta	COPB1	51.9	107.14	220.53	247	37	37	35	39	44	48	38	43	33	34	37	36	37	36	33	34	37	36	37	36	3771100000	3952100000	3699800000	4192500000	3963600000	4141500000	0.954	1	0.936	1.06	1.003	1.048	1.074	5.75E-02
P53621	Coatomer subunit alpha	COPA	54.2	138.34	323.31	402	59	59	59	76	60	74	63	70	55	59	56	57	57	56	55	59	56	57	57	56	5573200000	6380700000	5807700000	6381500000	5666300000	6442400000	0.922	1.056	0.961	1.056	0.938	1.066	1.127	5.40E-04
P53634	Dipeptidyl peptidase 1	CTSC	44.1	51.853	93.169	134	18	18	23	20	27	21	24	19	18	17	18	17	18	16	18	17	18	17	18	16	2690700000	2421100000	2762200000	2447100000	2686500000	2420500000	1.046	0.942	1.074	0.952	1.045	0.941	0.895	4.03E-04
P53680	AP-2 complex subunit sigma	AP2S1	44.4	17.018	26.697	39	7	7	5	5	7	6	6	10	6	6	7	6	6	6	6	6	7	6	6	6	458130000	455070000	450390000	439520000	474060000	436870000	1.013	1.006	0.996	0.972	1.048	0.966	0.963	1.31E-01
P53701	Cytochrome c-type heme lyase	HCCS	56.3	30.601	113.48	110	14	14	20	17	19	18	17	19	14	12	13	13	13	12	14	12	13	13	13	12	3206700000	2587000000	3234900000	2836300000	2978200000	2544400000	1.107	0.893	1.116	0.979	1.028	0.878	0.846	1.66E-02
P53794	Sodium/myo-inositol cotransporter	SLC5A3	6	79.693	7.2724	10	3	3	2	1	2	2	2	1	2	2	2	3	3	2	2	2	2	3	3	2	78669000	78226000	74534000	70303000	72213000	81635000	1.036	1.03	0.982	0.926	0.951	1.075	1.021	7.02E-01
P53801	Pituitary tumor-transforming gene 1 protein-interacting protein	PTTG1IP	17.8	20.324	4.2186	19	3	3	3	4	4	3	3	2	3	3	3	2	3	3	3	3	3	2	3	3	164630000	144480000	156690000	141050000	161340000	127720000	1.103	0.968	1.049	0.945	1.081	0.855	0.856	1.45E-02
P53804	E3 ubiquitin-protein ligase TTC3	TTC3	0.9	229.87	1.9424	4	2	2	1	1	1	0	0	1	2	1	1	1	1	2	2	1	1	1	1	2	607830000	0	0	0	0	693880000	0.934					1.066	1.142
P53985	Monocarboxylate transporter 1	SLC16A1	23.2	53.944	82.423	85	10	10	15	17	14	15	11	13	9	10	10	10	9	8	9	10	10	10	9	8	2884800000	2912000000	3847400000	2809700000	3398600000	2913100000	0.922	0.931	1.23	0.898	1.087	0.931	0.852	2.17E-01
P53990	IST1 homolog	IST1	17.3	39.75	27.083	22	5	5	4	4	3	4	4	3	4	4	4	4	5	4	4	4	4	4	5	4	208490000	196500000	253660000	234630000	184410000	251940000	0.941	0.887	1.145	1.059	0.832	1.137	1.056	6.65E-01
P53992	Protein transport protein Sec24C	SEC24C	29.3	118.32	119.12	154	24	24	26	26	24	27	25	26	22	22	22	23	22	23	22	22	22	23	22	23	958050000	1194000000	965280000	1255500000	1014200000	1213800000	0.871	1.085	0.877	1.141	0.922	1.103	1.247	6.64E-04
P53999	Activated RNA polymerase II transcriptional coactivator p15	SUB1	44.1	14.395	13.714	35	5	5	5	6	6	5	6	7	5	5	5	5	5	5	5	5	5	5	5	5	1101300000	923720000	981080000	1130800000	1213200000	1252500000	1.001	0.839	0.892	1.028	1.102	1.138	1.003	9.76E-01
P54098	DNA polymerase subunit gamma-1	POLG	9.8	139.56	37.496	31	10	10	7	5	4	5	5	5	9	8	9	9	9	9	9	8	9	9	9	9	394180000	445160000	365810000	384650000	366420000	403790000	1.002	1.132	0.93	0.978	0.932	1.027	1.095	1.51E-01
P54132	Bloom syndrome protein	BLM	17.1	159	54.536	33	17	17	6	5	6	4	8	4	14	10	16	12	13	9	14	10	16	12	13	9	304980000	253520000	299620000	281840000	324250000	270480000	1.055	0.877	1.036	0.975	1.122	0.936	0.868	2.11E-02
P54136	Arginine--tRNA ligase, cytoplasmic	RARS	63.3	75.378	168.37	265	39	39	44	44	43	48	43	43	36	37	35	37	36	38	36	37	35	37	36	38	5657500000	5634900000	5450400000	5776800000	5390000000	6153800000	0.997	0.993	0.96	1.018	0.949	1.084	1.065	1.11E-01
P54259	Atrophin-1	ATN1	2	125.41	3.6049	6	2	2	1	2	0	1	1	1	2	1	1	1	1	1	2	1	1	1	1	1	0	31234000	0	11810000	34923000	13044000		1.373		0.519	1.535	0.573	0.535
P54278	Mismatch repair endonuclease PMS2	PMS2	9	95.796	10.498	8	6	6	0	1	2	1	4	0	3	3	5	3	5	4	3	3	5	3	5	4	28808000	26395000	31575000	33162000	38573000	32819000	0.903	0.828	0.99	1.04	1.21	1.029	0.934	5.80E-01
P54577	Tyrosine--tRNA ligase, cytoplasmic	YARS	56.4	59.143	115.6	168	27	27	29	28	29	26	26	30	27	26	27	27	26	27	27	26	27	27	26	27	2895400000	3164500000	3051400000	3127800000	2920600000	3081600000	0.952	1.041	1.004	1.029	0.961	1.014	1.057	3.52E-02
P54578	Ubiquitin carboxyl-terminal hydrolase 14	USP14	45.1	56.068	103.07	118	19	19	22	21	19	18	18	20	16	17	15	16	16	16	16	17	15	16	16	16	738490000	923730000	786710000	944510000	796450000	843520000	0.88	1.101	0.938	1.126	0.949	1.006	1.168	2.18E-02
P54619	5'-AMP-activated protein kinase subunit gamma-1	PRKAG1	27.2	37.579	28.597	36	7	7	6	5	7	7	6	5	7	7	7	6	7	7	7	7	7	6	7	7	300610000	330270000	320880000	315620000	346340000	371130000	0.909	0.998	0.97	0.954	1.047	1.122	1.051	4.83E-01
P54709	Sodium/potassium-transporting ATPase subunit beta-3	ATP1B3	39.4	31.512	38.936	97	11	11	17	12	19	18	14	17	11	11	11	11	11	11	11	11	11	11	11	11	2895000000	2627300000	2795200000	2795100000	3088700000	2879900000	1.017	0.923	0.982	0.982	1.085	1.012	0.946	2.35E-01
P54725	UV excision repair protein RAD23 homolog A	RAD23A	39.9	39.609	63.125	30	9	6	5	6	4	5	4	6	7	9	6	9	8	9	4	6	3	6	5	6	304980000	297440000	359590000	297640000	351180000	305380000	0.955	0.931	1.126	0.932	1.1	0.956	0.886	1.55E-01
P54727	UV excision repair protein RAD23 homolog B	RAD23B	48.7	43.171	132.22	127	17	14	19	20	21	22	20	25	15	16	17	17	15	17	12	13	14	14	12	14	2568600000	3018600000	2571700000	2745200000	2413900000	2887800000	0.951	1.118	0.952	1.016	0.894	1.069	1.145	1.80E-02
P54760	Ephrin type-B receptor 4	EPHB4	11.2	108.27	12.972	15	8	6	3	2	2	3	1	4	6	7	6	8	7	7	4	5	4	6	5	5	112440000	107570000	111390000	111300000	118060000	98154000	1.024	0.98	1.014	1.013	1.075	0.894	0.927	1.34E-01
P54819	Adenylate kinase 2, mitochondrial	AK2	74.5	26.477	150.48	250	18	18	45	42	45	41	40	37	17	18	17	18	17	16	17	18	17	18	17	16	9566800000	8881600000	9290900000	8725600000	8713100000	8415700000	1.071	0.994	1.04	0.977	0.975	0.942	0.944	1.46E-01
P54886	Delta-1-pyrroline-5-carboxylate synthase	ALDH18A1	52.2	87.301	287.32	244	31	31	43	43	40	39	41	38	30	30	31	29	29	30	30	30	31	29	29	30	5555400000	4467000000	5167900000	4602700000	5545500000	4710100000	1.109	0.892	1.032	0.919	1.107	0.94	0.847	4.70E-03
P54920	Alpha-soluble NSF attachment protein	NAPA	79	33.232	196.59	153	18	18	25	26	24	26	22	30	16	16	18	18	17	17	16	16	18	18	17	17	2521900000	2156900000	2222800000	2270800000	2432900000	2290400000	1.089	0.931	0.96	0.981	1.05	0.989	0.936	1.93E-01
P55010	Eukaryotic translation initiation factor 5	EIF5	44.3	49.222	98.833	123	18	18	18	20	18	21	21	25	16	17	17	17	18	17	16	17	17	17	18	17	2098000000	2255900000	2344200000	2233000000	2262000000	2264100000	0.935	1.006	1.045	0.996	1.009	1.009	1.007	8.44E-01
P55011	Solute carrier family 12 member 2	SLC12A2	26.2	131.45	118.95	116	24	24	20	17	21	17	23	18	20	20	23	17	22	20	20	20	23	17	22	20	824470000	763620000	928700000	772030000	931830000	762690000	0.993	0.919	1.118	0.93	1.122	0.918	0.856	6.79E-02
P55036	26S proteasome non-ATPase regulatory subunit 4	PSMD4	46.9	40.736	101	112	14	11	16	21	16	21	17	21	11	13	12	11	11	13	10	10	10	9	10	10	1359900000	1466100000	1387300000	1616300000	1560400000	1391500000	0.929	1.002	0.948	1.104	1.066	0.951	1.039	5.76E-01
P55039	Developmentally-regulated GTP-binding protein 2	DRG2	19.5	40.746	10.154	14	6	6	4	3	2	1	3	1	6	4	4	4	4	2	6	4	4	4	4	2	39167000	46460000	36335000	54114000	30468000	51965000	0.909	1.078	0.843	1.256	0.707	1.206	1.439	1.06E-02
P55060	Exportin-2	CSE1L	50.9	110.42	230.87	297	42	42	45	55	47	51	47	52	41	41	39	40	40	40	41	41	39	40	40	40	7553900000	8509700000	7637000000	8397300000	7867300000	8452100000	0.936	1.055	0.946	1.041	0.975	1.047	1.1	1.50E-03
P55061	Bax inhibitor 1	TMBIM6	9.3	26.537	5.836	17	3	3	4	5	2	1	3	2	3	3	3	3	3	3	3	3	3	3	3	3	222370000	225880000	238490000	300780000	258940000	176300000	0.938	0.953	1.006	1.268	1.092	0.743	0.977	8.89E-01
P55072	Transitional endoplasmic reticulum ATPase	VCP	73.4	89.321	323.31	476	47	47	75	84	71	81	81	84	46	47	46	46	46	47	46	47	46	46	46	47	16076000000	15379000000	15637000000	15590000000	15346000000	15220000000	1.034	0.99	1.006	1.003	0.987	0.979	0.982	2.89E-01
P55081	Microfibrillar-associated protein 1	MFAP1	29.2	51.958	123.41	63	9	9	10	11	10	12	11	9	9	8	9	8	9	8	9	8	9	8	9	8	451020000	544750000	413740000	408930000	493590000	602350000	0.929	1.122	0.852	0.842	1.016	1.24	1.146	3.46E-01
P55084	Trifunctional enzyme subunit beta, mitochondrial	HADHB	46	51.294	105.58	146	19	19	22	24	22	27	25	26	17	17	18	18	17	18	17	17	18	18	17	18	3914700000	3635300000	3788900000	3685400000	4129100000	3905800000	1.019	0.946	0.986	0.959	1.074	1.016	0.949	1.94E-01
P55085	Proteinase-activated receptor 2	F2RL1	5.3	44.126	3.44	7	2	2	1	2	1	1	1	1	2	2	2	2	2	2	2	2	2	2	2	2	28157000	19083000	26780000	24803000	27471000	26298000	1.107	0.75	1.053	0.975	1.08	1.034	0.852	1.42E-01
P55145	Mesencephalic astrocyte-derived neurotrophic factor	MANF	43.4	20.7	43.496	97	12	12	18	12	18	15	17	17	10	10	10	10	11	11	10	10	10	10	11	11	1853100000	1375300000	1644700000	1509700000	1517200000	1484800000	1.185	0.879	1.052	0.965	0.97	0.949	0.871	1.13E-01
P55196	Afadin	AFDN	43.6	206.8	288.04	247	55	55	37	38	40	41	49	42	49	49	52	47	49	48	49	49	52	47	49	48	2300000000	2035900000	2411600000	2190200000	2319900000	2100700000	1.033	0.914	1.083	0.984	1.042	0.944	0.9	1.41E-02
P55199	RNA polymerase II elongation factor ELL	ELL	5.6	68.264	6.8745	4	3	3	1	0	1	1	1	0	3	3	2	3	3	3	3	3	2	3	3	3	51185000	0	0	46238000	54989000	0	1.007			0.91	1.082		0.871
P55209	Nucleosome assembly protein 1-like 1	NAP1L1	36.8	45.374	62.197	73	9	8	11	13	14	12	11	12	8	9	8	9	8	9	7	8	7	8	7	8	3892000000	4346200000	3873400000	3837600000	3876500000	4152600000	0.974	1.088	0.969	0.96	0.97	1.039	1.06	2.59E-01
P55263	Adenosine kinase	ADK	56.1	40.545	139.68	104	13	13	15	17	15	19	18	20	13	13	13	13	13	13	13	13	13	13	13	13	1259200000	1336400000	1115800000	1355600000	1215900000	1395500000	0.984	1.044	0.872	1.059	0.95	1.09	1.138	2.26E-02
P55265	Double-stranded RNA-specific adenosine deaminase	ADAR	37.8	136.06	231.49	273	36	36	42	49	49	43	47	43	35	34	35	35	35	35	35	34	35	35	35	35	3524000000	3403200000	3688600000	3556800000	3792300000	3791400000	0.972	0.939	1.017	0.981	1.046	1.046	0.977	5.71E-01
P55327	Tumor protein D52	TPD52	37.1	24.327	27.432	39	5	5	5	6	5	7	7	9	5	5	5	5	5	5	5	5	5	5	5	5	406580000	384900000	349080000	367020000	361240000	408660000	1.071	1.014	0.92	0.967	0.952	1.077	1.039	5.31E-01
P55735	Protein SEC13 homolog	SEC13	50.3	35.54	63.825	67	10	10	12	11	11	10	10	13	9	8	10	8	8	8	9	8	10	8	8	8	1928800000	1661500000	1952500000	1945400000	1839200000	1854400000	1.035	0.892	1.048	1.044	0.987	0.995	0.955	3.94E-01
P55769	NHP2-like protein 1	SNU13	47.7	14.173	46.457	63	6	6	12	10	10	10	11	10	6	6	6	6	6	6	6	6	6	6	6	6	2465900000	2029000000	2301100000	2016700000	2346700000	2003000000	1.124	0.925	1.049	0.919	1.07	0.913	0.85	1.90E-02
P55786	Puromycin-sensitive aminopeptidase	NPEPPS	46.4	103.28	204.4	183	33	33	26	39	27	33	26	32	31	32	28	29	28	31	31	32	28	29	28	31	2021700000	2161300000	1882500000	2224200000	2094200000	2177100000	0.966	1.032	0.899	1.062	1	1.04	1.094	4.43E-02
P55789	FAD-linked sulfhydryl oxidase ALR	GFER	45.4	23.449	49.87	36	6	6	8	7	6	6	5	4	6	6	6	6	6	6	6	6	6	6	6	6	248910000	203490000	208280000	201320000	242330000	201500000	1.144	0.935	0.957	0.925	1.113	0.926	0.867	1.33E-01
P55795	Heterogeneous nuclear ribonucleoprotein H2	HNRNPH2	49.4	49.263	103.8	61	16	9	10	11	10	9	8	13	16	16	16	14	16	15	9	9	9	8	9	8	1069600000	983800000	1020300000	1059600000	1052100000	969660000	1.043	0.959	0.995	1.033	1.026	0.945	0.959	2.43E-01
P55809	Succinyl-CoA:3-ketoacid coenzyme A transferase 1, mitochondrial	OXCT1	49.6	56.157	168.11	157	18	18	29	24	23	28	25	28	17	18	17	18	17	16	17	18	17	18	17	16	2336400000	2403700000	2347900000	2495800000	2460500000	2453300000	0.967	0.995	0.972	1.033	1.018	1.015	1.029	2.20E-01
P55854	Small ubiquitin-related modifier 3	SUMO3	20.4	11.637	6.8077	25	2	1	3	5	3	5	4	5	2	2	2	2	2	2	1	1	1	1	1	1	591820000	1570700000	611040000	1815700000	938320000	1284800000	0.521	1.383	0.538	1.599	0.826	1.132	2.182	1.14E-02
P55884	Eukaryotic translation initiation factor 3 subunit B	EIF3B	60.7	92.48	214.8	296	36	36	47	49	45	57	45	53	35	35	34	34	35	35	35	35	34	34	35	35	5054600000	7167500000	5181500000	7145800000	5311300000	6973200000	0.823	1.168	0.844	1.164	0.865	1.136	1.369	3.89E-05
P55957	BH3-interacting domain death agonist	BID	47.2	21.994	94.257	40	6	6	7	6	7	7	5	8	6	6	6	6	6	6	6	6	6	6	6	6	252890000	347760000	244470000	314930000	244120000	275190000	0.904	1.242	0.873	1.125	0.872	0.983	1.265	9.06E-02
P56134	ATP synthase subunit f, mitochondrial	ATP5J2	39.4	10.918	7.911	9	3	3	1	2	2	1	2	1	2	3	3	2	3	2	2	3	3	2	3	2	0	0	402290000	339730000	506300000	0			0.967	0.816	1.217		0.748
P56181	NADH dehydrogenase [ubiquinone] flavoprotein 3, mitochondrial	NDUFV3	14.8	11.94	7.04	13	1	1	2	2	2	2	3	2	1	1	1	1	1	1	1	1	1	1	1	1	113040000	73114000	118220000	71369000	87284000	57390000	1.303	0.843	1.363	0.823	1.006	0.662	0.634	2.26E-02
P56182	Ribosomal RNA processing protein 1 homolog A	RRP1	40.8	52.839	72.235	88	19	19	16	14	14	11	20	13	16	16	17	17	19	18	16	16	17	17	19	18	1134900000	971470000	1157900000	968390000	1097400000	1000100000	1.076	0.921	1.098	0.918	1.04	0.948	0.867	1.80E-03
P56192	Methionine--tRNA ligase, cytoplasmic	MARS	49.4	101.11	180.72	210	32	32	36	38	33	37	32	34	30	30	29	30	30	28	30	30	29	30	30	28	2111100000	2291100000	2159000000	2196900000	2099100000	2301000000	0.963	1.045	0.984	1.002	0.957	1.049	1.066	2.10E-02
P56211	cAMP-regulated phosphoprotein 19	ARPP19	62.5	12.323	11.232	20	6	5	5	4	3	3	3	2	6	6	6	6	5	6	5	5	5	5	4	5	150930000	192730000	224190000	209120000	247430000	183740000	0.75	0.957	1.113	1.039	1.229	0.913	0.941	7.02E-01
P56270	Myc-associated zinc finger protein	MAZ	11.5	48.607	23.094	35	4	4	5	7	6	5	7	5	4	4	4	4	4	4	4	4	4	4	4	4	320560000	218940000	298270000	157490000	241610000	202410000	1.336	0.913	1.243	0.657	1.007	0.844	0.673	3.46E-02
P56277	Cx9C motif-containing protein 4	CMC4	54.4	7.7469	17.692	14	4	4	5	3	2	1	2	1	4	3	2	3	2	2	4	3	2	3	2	2	94701000	63590000	121750000	58191000	141050000	54050000	1.065	0.715	1.37	0.655	1.587	0.608	0.492	1.16E-02
P56378	6.8 kDa mitochondrial proteolipid	MP68	32.8	6.662	2.7242	18	2	2	3	3	3	3	3	3	2	2	2	2	2	2	2	2	2	2	2	2	364610000	341680000	395150000	402980000	421120000	344950000	0.964	0.903	1.044	1.065	1.113	0.912	0.923	3.03E-01
P56385	ATP synthase subunit e, mitochondrial	ATP5I	62.3	7.9331	7.304	22	5	5	5	4	3	3	3	4	5	5	4	5	4	5	5	5	4	5	4	5	788890000	709700000	805790000	734820000	873340000	703190000	1.025	0.923	1.047	0.955	1.135	0.914	0.87	1.79E-02
P56537	Eukaryotic translation initiation factor 6	EIF6	72.7	26.599	123.63	102	10	10	15	19	16	16	20	16	9	10	10	9	10	9	9	10	10	9	10	9	4183700000	4438000000	4243100000	4947000000	4557200000	5099300000	0.914	0.969	0.927	1.081	0.995	1.114	1.116	9.65E-02
P56545	C-terminal-binding protein 2	CTBP2	40.2	48.944	57.517	58	11	8	8	11	10	12	8	9	6	9	8	8	7	9	5	6	6	7	6	7	927780000	977600000	897560000	954720000	938870000	979080000	0.981	1.033	0.949	1.009	0.993	1.035	1.053	2.86E-02
P56556	NADH dehydrogenase [ubiquinone] 1 alpha subcomplex subunit 6	NDUFA6	33.1	17.871	20.511	40	5	5	6	6	8	6	7	7	5	5	5	5	5	5	5	5	5	5	5	5	213920000	148800000	225530000	160950000	207920000	192590000	1.116	0.777	1.177	0.84	1.085	1.005	0.776	2.62E-02
P56557	Transmembrane protein 50B	TMEM50B	12.7	17.936	3.9267	7	2	2	1	1	1	1	1	2	2	2	1	1	2	2	2	2	1	1	2	2	0	22893000	0	0	19604000	37631000		0.857			0.734	1.409	1.544
P56589	Peroxisomal biogenesis factor 3	PEX3	34	42.139	26.402	41	9	9	10	6	6	6	7	6	8	8	7	7	6	6	8	8	7	7	6	6	344540000	329740000	394520000	321640000	392190000	320650000	0.983	0.941	1.125	0.918	1.119	0.915	0.859	3.26E-02
P56937	3-keto-steroid reductase	HSD17B7	14.1	38.206	12.729	10	3	3	3	1	1	2	1	2	2	2	2	2	2	3	2	2	2	2	2	3	44990000	75322000	67000000	57183000	69925000	69714000	0.703	1.176	1.047	0.893	1.092	1.089	1.112	5.17E-01
P56945	Breast cancer anti-estrogen resistance protein 1	BCAR1	15.7	93.371	40.17	18	8	8	2	1	4	3	5	3	5	3	7	4	6	6	5	3	7	4	6	6	124580000	101400000	118940000	92296000	127770000	104720000	1.116	0.908	1.066	0.827	1.145	0.938	0.804	5.80E-03
P56962	Syntaxin-17	STX17	27.2	33.403	31.72	31	7	7	5	4	6	4	8	4	6	6	6	5	7	6	6	6	6	5	7	6	193610000	137490000	160830000	157500000	189140000	151820000	1.173	0.833	0.974	0.954	1.146	0.92	0.822	5.31E-02
P57076	UPF0769 protein C21orf59	C21orf59	29	33.224	33.89	27	6	6	7	4	3	5	4	4	6	5	6	5	4	5	6	5	6	5	4	5	177960000	175140000	174250000	165610000	171590000	133190000	1.07	1.053	1.048	0.996	1.032	0.801	0.905	3.25E-01
P57088	Transmembrane protein 33	TMEM33	33.6	27.978	49.352	117	10	10	18	18	23	19	20	19	10	10	10	10	10	10	10	10	10	10	10	10	5042000000	4175400000	4836800000	4679200000	4957100000	4633300000	1.068	0.884	1.025	0.991	1.05	0.981	0.909	5.88E-02
P57105	Synaptojanin-2-binding protein	SYNJ2BP	57.9	15.928	32.858	62	6	6	9	10	10	12	9	12	6	6	6	6	6	6	6	6	6	6	6	6	1158400000	992610000	996750000	923260000	962560000	990360000	1.154	0.989	0.993	0.92	0.959	0.986	0.932	3.36E-01
P57678	Gem-associated protein 4	GEMIN4	34.2	120.04	101.02	125	29	29	22	25	22	19	16	21	25	23	23	22	24	23	25	23	23	22	24	23	814540000	852940000	835560000	866820000	849980000	885650000	0.957	1.002	0.982	1.019	0.999	1.041	1.042	6.61E-02
P57735	Ras-related protein Rab-25	RAB25	37.1	23.495	22.515	28	7	6	7	3	5	3	5	5	7	6	6	6	7	6	6	5	5	5	6	5	433620000	167580000	525330000	165610000	460340000	197880000	1.334	0.516	1.616	0.509	1.416	0.609	0.374	5.35E-04
P57737	Coronin-7	CORO7	9.9	100.6	21.118	16	5	5	4	1	2	4	3	2	4	3	3	3	3	2	4	3	3	3	3	2	48185000	93389000	70553000	103240000	64608000	133070000	0.564	1.092	0.825	1.207	0.756	1.556	1.798	2.34E-02
P57740	Nuclear pore complex protein Nup107	NUP107	50.3	106.37	209.17	210	35	35	42	29	33	36	40	30	33	29	31	30	32	30	33	29	31	30	32	30	2240900000	1976200000	2360000000	2029500000	2394900000	2000800000	1.034	0.912	1.089	0.937	1.105	0.923	0.859	2.56E-03
P57772	Selenocysteine-specific elongation factor	EEFSEC	15.1	65.304	15.171	21	7	7	2	3	4	4	3	5	5	5	6	5	5	5	5	5	6	5	5	5	133340000	167170000	143980000	150570000	155240000	144340000	0.894	1.121	0.966	1.01	1.041	0.968	1.068	3.49E-01
P58107	Epiplakin	EPPK1	44.5	555.61	323.31	223	56	50	38	39	29	36	37	44	50	51	49	51	48	51	44	45	43	45	42	45	1815100000	1940900000	1840900000	1832600000	1784600000	1946500000	0.976	1.043	0.99	0.985	0.959	1.046	1.051	8.29E-02
P58546	Myotrophin	MTPN	38.1	12.895	37.966	29	3	3	4	4	4	6	6	5	3	3	3	3	3	3	3	3	3	3	3	3	463850000	550640000	516500000	579570000	492010000	477490000	0.904	1.073	1.006	1.129	0.958	0.93	1.092	2.55E-01
P58557	Putative ribonuclease	YBEY	11.4	19.298	3.7766	11	2	2	2	2	1	2	2	2	2	2	2	2	2	2	2	2	2	2	2	2	48838000	0	40883000	51802000	51294000	40546000	1.046		0.876	1.11	1.099	0.869	0.982	8.96E-01
P59998	Actin-related protein 2/3 complex subunit 4	ARPC4	67.9	19.667	74.34	64	9	9	10	10	10	10	10	14	9	9	8	8	8	8	9	9	8	8	8	8	1814400000	1974800000	1965500000	1984200000	1980400000	2029900000	0.927	1.008	1.004	1.013	1.011	1.037	1.04	2.43E-01
P60033	CD81 antigen	CD81	28.4	25.809	78.183	39	4	4	8	8	7	5	6	5	4	4	4	3	3	4	4	4	4	3	3	4	1129700000	1475700000	1298700000	1314200000	1169200000	1431900000	0.867	1.132	0.997	1.008	0.897	1.099	1.174	4.14E-02
P60059	Protein transport protein Sec61 subunit gamma	SEC61G	36.8	7.7412	7.0343	15	2	2	3	3	3	1	3	2	2	2	2	2	2	2	2	2	2	2	2	2	285640000	330930000	306590000	359320000	355880000	366170000	0.855	0.991	0.918	1.076	1.065	1.096	1.114	1.98E-01
P60174	Triosephosphate isomerase	TPI1	74.1	30.791	205.04	267	18	18	38	46	43	46	48	46	18	18	18	18	18	18	18	18	18	18	18	18	22077000000	24942000000	23234000000	25410000000	23671000000	25388000000	0.915	1.034	0.963	1.053	0.981	1.053	1.098	1.07E-02
P60228	Eukaryotic translation initiation factor 3 subunit E	EIF3E	59.1	52.22	135.98	166	24	24	31	26	27	32	23	27	23	24	23	24	22	24	23	24	23	24	22	24	3168100000	3969300000	3156300000	4207200000	3157300000	4059300000	0.875	1.097	0.872	1.162	0.872	1.121	1.29	5.68E-03
P60468	Protein transport protein Sec61 subunit beta	SEC61B	37.5	9.9743	21.462	38	3	3	6	6	8	6	6	6	3	3	3	3	3	3	3	3	3	3	3	3	3523800000	3282800000	4257800000	3770400000	3183900000	2757600000	1.018	0.948	1.23	1.089	0.919	0.796	0.895	4.23E-01
P60510	Serine/threonine-protein phosphatase 4 catalytic subunit	PPP4C	50.8	35.08	90.327	42	11	10	7	9	5	7	6	8	9	9	7	9	9	10	8	8	6	8	8	9	358030000	426390000	379210000	458080000	407860000	385290000	0.89	1.059	0.942	1.138	1.013	0.957	1.109	1.79E-01
P60520	Gamma-aminobutyric acid receptor-associated protein-like 2	GABARAPL2	31.6	13.667	7.1249	19	4	3	3	5	3	2	3	3	4	4	4	4	4	4	3	3	3	3	3	3	497170000	459090000	356010000	425050000	422980000	524900000	1.111	1.026	0.795	0.95	0.945	1.173	1.104	4.28E-01
P60602	Reactive oxygen species modulator 1	ROMO1	21.5	8.1828	13.542	28	1	1	4	4	7	4	6	3	1	1	1	1	1	1	1	1	1	1	1	1	284070000	325270000	326380000	346620000	357310000	353820000	0.855	0.979	0.982	1.043	1.075	1.065	1.06	4.46E-01
P60604	Ubiquitin-conjugating enzyme E2 G2	UBE2G2	47.3	18.566	28.493	36	5	5	6	5	7	8	6	4	5	5	5	5	5	5	5	5	5	5	5	5	685100000	498100000	655950000	578300000	656510000	610860000	1.116	0.811	1.068	0.942	1.069	0.995	0.845	4.13E-02
P60660	Myosin light polypeptide 6	MYL6	55.6	16.93	59.67	91	8	6	14	17	13	15	15	17	8	8	8	8	8	8	6	6	6	6	6	6	4797300000	6339200000	5188700000	6925000000	5265000000	6141500000	0.831	1.097	0.898	1.199	0.912	1.063	1.272	7.42E-03
P60709	Actin, cytoplasmic 1	ACTB	77.3	41.736	48.429	110	25	2	19	15	21	19	18	18	24	24	25	25	25	25	2	2	2	2	2	2	17570000000	18088000000	18179000000	21021000000	17059000000	18680000000	0.953	0.981	0.986	1.14	0.925	1.013	1.094	1.56E-01
P60842	Eukaryotic initiation factor 4A-I	EIF4A1	61.3	46.153	196.56	311	25	12	50	57	48	53	45	58	25	24	25	24	25	25	12	12	12	12	12	12	13547000000	14876000000	12995000000	15288000000	12934000000	14397000000	0.967	1.062	0.928	1.092	0.923	1.028	1.129	6.30E-03
P60866	40S ribosomal protein S20	RPS20	32.8	13.373	17.326	59	4	4	11	10	8	10	10	10	4	4	4	4	4	4	4	4	4	4	4	4	5934600000	7582900000	6122300000	7223300000	5901500000	7792000000	0.878	1.122	0.906	1.069	0.873	1.153	1.258	1.00E-03
P60891	Ribose-phosphate pyrophosphokinase 1	PRPS1	59.4	34.834	79.547	116	15	5	20	19	19	18	20	20	15	14	14	15	13	15	5	5	5	5	5	5	1772400000	1774600000	1689100000	1845600000	1662200000	1840100000	1.005	1.006	0.958	1.046	0.942	1.043	1.066	4.95E-02
P60900	Proteasome subunit alpha type-6	PSMA6	62.2	27.399	58.113	104	15	15	16	20	17	16	16	19	15	15	15	15	15	15	15	15	15	15	15	15	1924600000	2018600000	1997600000	2002300000	1895200000	1903200000	0.983	1.032	1.021	1.023	0.968	0.973	1.018	4.93E-01
P60903	Protein S100-A10	S100A10	35.1	11.203	20.751	129	3	3	23	21	22	22	21	20	3	3	3	3	3	3	3	3	3	3	3	3	2865600000	3847300000	2756200000	4084600000	3203000000	3780600000	0.837	1.124	0.805	1.193	0.936	1.105	1.327	4.12E-03
P60953	Cell division control protein 42 homolog	CDC42	44	21.258	51.806	94	7	6	15	15	16	17	15	16	7	7	7	7	7	7	6	6	6	6	6	6	3842800000	3463500000	4375200000	3159800000	3620400000	3019800000	1.073	0.967	1.222	0.883	1.011	0.843	0.815	4.78E-02
P60981	Destrin	DSTN	68.5	18.506	45.786	86	12	11	16	12	15	15	14	14	12	11	11	10	12	11	11	10	10	9	11	10	1286700000	1427900000	1229500000	1279900000	1185000000	1395200000	0.989	1.098	0.945	0.984	0.911	1.073	1.109	6.71E-02
P60983	Glia maturation factor beta	GMFB	14.8	16.713	13.109	5	2	2	0	1	0	1	1	2	1	2	2	2	1	2	1	2	2	2	1	2	0	69792000	52900000	68352000	0	74338000		1.052	0.797	1.03		1.12	1.339
P61006	Ras-related protein Rab-8A	RAB8A	46.4	23.668	153.09	44	10	6	9	7	10	3	8	7	10	9	10	9	10	8	6	5	6	6	6	5	1133100000	538590000	1135000000	595020000	1024700000	485830000	1.384	0.658	1.386	0.727	1.252	0.593	0.492	3.19E-04
P61009	Signal peptidase complex subunit 3	SPCS3	21.7	20.313	10.208	27	4	4	5	3	5	4	6	4	4	4	4	4	4	4	4	4	4	4	4	4	435310000	457480000	469500000	492620000	490150000	472710000	0.927	0.974	1	1.049	1.044	1.007	1.02	6.50E-01
P61011	Signal recognition particle 54 kDa protein	SRP54	45	55.704	95.84	119	19	19	19	20	19	18	20	23	17	17	18	17	18	18	17	17	18	17	18	18	1212600000	1657200000	1215000000	1712900000	1335400000	1666700000	0.827	1.13	0.828	1.168	0.911	1.136	1.339	6.44E-04
P61019	Ras-related protein Rab-2A	RAB2A	87.3	23.545	127.3	150	16	16	27	20	29	24	29	21	15	15	14	15	15	15	15	15	14	15	15	15	4956400000	2643100000	4978400000	2456900000	4724100000	2526200000	1.334	0.712	1.34	0.661	1.272	0.68	0.52	1.90E-05
P61020	Ras-related protein Rab-5B	RAB5B	41.4	23.707	46.618	24	7	4	5	3	6	2	6	2	7	6	7	6	7	6	4	3	4	3	4	3	212840000	126920000	144330000	131420000	203480000	95922000	1.396	0.832	0.947	0.862	1.334	0.629	0.632	4.66E-02
P61024	Cyclin-dependent kinases regulatory subunit 1	CKS1B	32.9	9.6601	8.7579	13	2	2	3	2	3	1	2	2	2	2	2	1	2	2	2	2	2	1	2	2	100530000	96690000	86602000	0	82250000	73140000	1.144	1.101	0.986		0.936	0.833	0.946	6.95E-01
P61026	Ras-related protein Rab-10	RAB10	37.5	22.541	54.697	62	10	8	10	11	10	9	12	10	9	10	10	10	10	10	7	8	8	8	8	8	1986500000	1297000000	2109600000	1045200000	2001600000	1157200000	1.242	0.811	1.319	0.653	1.251	0.723	0.574	4.63E-04
P61077	Ubiquitin-conjugating enzyme E2 D3	UBE2D3	40.8	16.687	21.549	27	4	3	3	6	4	5	4	5	3	4	3	4	3	4	2	3	2	3	2	3	346630000	428900000	346790000	394890000	285680000	367780000	0.958	1.186	0.959	1.092	0.79	1.017	1.217	5.83E-02
P61081	NEDD8-conjugating enzyme Ubc12	UBE2M	35.5	20.9	17.077	29	6	6	4	5	5	5	4	6	6	6	6	6	6	6	6	6	6	6	6	6	783460000	856140000	690430000	801370000	719550000	830100000	1.004	1.097	0.885	1.027	0.922	1.064	1.134	3.65E-02
P61086	Ubiquitin-conjugating enzyme E2 K	UBE2K	63	22.406	40.537	53	10	10	7	9	8	9	8	12	9	10	9	9	10	10	9	10	9	9	10	10	423100000	466270000	451520000	444020000	382530000	480000000	0.959	1.057	1.023	1.006	0.867	1.088	1.106	1.21E-01
P61088	Ubiquitin-conjugating enzyme E2 N	UBE2N	71.7	17.138	63.79	97	9	9	15	17	14	17	16	18	9	8	9	9	9	9	9	8	9	9	9	9	1724200000	2058700000	1686100000	2145800000	1581900000	1887400000	0.933	1.114	0.913	1.162	0.856	1.022	1.22	1.36E-02
P61106	Ras-related protein Rab-14	RAB14	81.9	23.897	201.98	138	15	15	29	20	27	22	21	19	15	13	15	15	15	14	15	13	15	15	15	14	5524100000	3069700000	5498700000	3421500000	6252100000	3479000000	1.217	0.676	1.211	0.753	1.377	0.766	0.577	9.39E-04
P61158	Actin-related protein 3	ACTR3	68.7	47.371	277.78	249	22	17	43	40	37	44	40	45	21	20	22	21	21	20	16	15	17	16	16	15	8193800000	7362300000	7608900000	7333500000	7630000000	7849400000	1.069	0.961	0.993	0.957	0.996	1.024	0.962	3.09E-01
P61160	Actin-related protein 2	ACTR2	53.6	44.76	98.514	164	15	15	25	28	27	28	28	28	14	14	14	14	14	14	14	14	14	14	14	14	3807000000	3519800000	3858100000	3366800000	3975300000	3545100000	1.035	0.957	1.049	0.915	1.081	0.964	0.896	5.72E-03
P61163	Alpha-centractin	ACTR1A	41	42.613	76.645	72	10	7	12	12	11	12	13	12	9	9	9	10	9	9	6	6	6	7	6	6	977850000	1071400000	907410000	1103300000	1047300000	1181500000	0.933	1.022	0.866	1.053	0.999	1.127	1.144	5.31E-02
P61201	COP9 signalosome complex subunit 2	COPS2	33.9	51.596	30.913	58	11	11	9	10	8	10	8	13	11	11	10	9	9	11	11	11	10	9	9	11	431440000	377780000	419460000	450160000	436420000	450630000	1.009	0.883	0.981	1.053	1.021	1.054	0.993	9.12E-01
P61221	ATP-binding cassette sub-family E member 1	ABCE1	44.2	67.314	160.74	114	22	22	19	20	16	25	16	18	19	19	18	22	17	19	19	19	18	22	17	19	1298900000	1669600000	1301900000	1658200000	1247700000	1626200000	0.885	1.138	0.887	1.13	0.85	1.108	1.287	7.63E-05
P61224	Ras-related protein Rap-1b	RAP1B	72.8	20.825	149.3	115	10	4	23	15	24	17	21	15	10	9	10	9	9	9	4	4	4	4	4	4	4527100000	2669200000	4676100000	2656600000	4404800000	2623600000	1.26	0.743	1.301	0.739	1.226	0.73	0.584	1.94E-05
P61225	Ras-related protein Rap-2b	RAP2B	58.5	20.504	76.64	49	9	5	9	7	9	7	10	7	8	7	8	7	8	8	4	3	4	4	5	4	768070000	428170000	693790000	385420000	737000000	405850000	1.348	0.752	1.218	0.677	1.294	0.712	0.555	1.97E-04
P61244	Protein max	MAX	38.1	18.275	27.176	20	5	5	4	1	4	2	5	4	4	4	5	3	4	4	4	4	5	3	4	4	172570000	144730000	121320000	121390000	168150000	99102000	1.252	1.05	0.88	0.88	1.22	0.719	0.79	2.00E-01
P61247	40S ribosomal protein S3a	RPS3A	58	29.945	115.44	206	15	15	31	38	28	38	31	40	15	15	15	15	15	15	15	15	15	15	15	15	15075000000	17627000000	14713000000	18192000000	15004000000	17841000000	0.919	1.074	0.897	1.109	0.914	1.087	1.198	1.19E-04
P61254	60S ribosomal protein L26	RPL26	35.2	17.258	27.987	83	8	2	15	12	16	12	14	14	8	7	8	8	8	8	2	2	2	2	2	2	4280200000	4728900000	4762200000	4348700000	4155000000	4571400000	0.957	1.057	1.064	0.972	0.929	1.022	1.034	5.23E-01
P61289	Proteasome activator complex subunit 3	PSME3	55.5	29.506	100.58	75	11	11	13	12	16	11	11	12	9	9	11	9	9	11	9	9	11	9	9	11	1708300000	1658400000	1578300000	1455000000	1509700000	1529100000	1.086	1.054	1.003	0.925	0.96	0.972	0.968	5.71E-01
P61313	60S ribosomal protein L15	RPL15	50	24.146	81.999	139	14	14	22	23	20	24	25	25	14	13	14	14	14	14	14	13	14	14	14	14	7590400000	8004900000	7402600000	7526400000	7097700000	7445000000	1.011	1.066	0.986	1.002	0.945	0.991	1.04	2.62E-01
P61353	60S ribosomal protein L27	RPL27	48.5	15.798	45.151	75	6	6	9	14	13	13	12	14	6	6	6	6	6	6	6	6	6	6	6	6	10491000000	9134100000	10057000000	10158000000	11524000000	11218000000	1.006	0.876	0.964	0.974	1.105	1.076	0.951	5.22E-01
P61421	V-type proton ATPase subunit d 1	ATP6V0D1	26.2	40.329	32.172	24	7	7	6	2	5	4	5	2	6	6	6	6	5	6	6	6	6	6	5	6	358890000	299060000	370820000	344580000	388010000	341750000	1.024	0.853	1.058	0.983	1.107	0.975	0.882	6.02E-02
P61457	Pterin-4-alpha-carbinolamine dehydratase	PCBD1	17.3	11.999	4.0994	12	2	2	2	2	2	2	2	2	2	2	2	2	2	2	2	2	2	2	2	2	92818000	117640000	98757000	0	93167000	131440000	0.869	1.102	0.925		0.873	1.231	1.312	1.39E-02
P61513	60S ribosomal protein L37a	RPL37A	51.1	10.275	17.752	57	5	5	8	10	10	11	10	8	5	5	5	5	5	5	5	5	5	5	5	5	2061300000	2915500000	2585700000	2605700000	2574200000	2871500000	0.792	1.12	0.994	1.001	0.989	1.103	1.162	1.20E-01
P61586	Transforming protein RhoA	RHOA	71.5	21.768	91.973	100	11	4	18	16	21	15	16	14	11	10	11	10	11	9	4	4	4	4	4	3	5884200000	3660300000	6432300000	3890100000	6578800000	3545400000	1.177	0.732	1.287	0.778	1.316	0.709	0.587	3.78E-04
P61604	10 kDa heat shock protein, mitochondrial	HSPE1	75.5	10.932	33.644	185	9	9	33	30	31	30	31	30	9	9	9	9	9	8	9	9	9	9	9	8	22030000000	19837000000	20361000000	20657000000	22109000000	20729000000	1.051	0.947	0.972	0.986	1.055	0.989	0.949	1.62E-01
P61619	Protein transport protein Sec61 subunit alpha isoform 1	SEC61A1	26.9	52.264	70.788	92	11	6	13	15	15	16	16	17	9	10	10	11	11	11	4	5	5	6	6	6	3627500000	3723700000	3870700000	3864700000	4238800000	3578900000	0.95	0.975	1.014	1.012	1.11	0.938	0.951	3.87E-01
P61758	Prefoldin subunit 3	VBP1	40.6	22.658	67.705	40	7	7	6	7	6	9	6	6	7	7	7	7	7	7	7	7	7	7	7	7	540880000	650680000	549810000	710970000	590790000	726360000	0.861	1.036	0.875	1.132	0.94	1.156	1.242	8.12E-03
P61764	Syntaxin-binding protein 1	STXBP1	3.7	67.568	4.2987	4	2	2	0	0	0	1	1	2	1	1	1	2	2	2	1	1	1	2	2	2	0	0	0	36088000	44352000	32723000				0.957	1.176	0.868	0.776
P61769	Beta-2-microglobulin	B2M	35.3	13.714	20.961	33	3	3	5	6	6	5	5	6	3	3	3	3	3	3	3	3	3	3	3	3	1759400000	2035200000	2084500000	1875100000	1980500000	1974900000	0.902	1.043	1.068	0.961	1.015	1.012	1.01	8.59E-01
P61803	Dolichyl-diphosphooligosaccharide--protein glycosyltransferase subunit DAD1	DAD1	35.4	12.497	27.475	36	4	4	6	5	7	6	7	5	4	4	4	4	4	4	4	4	4	4	4	4	1990100000	1606700000	1799500000	1545400000	1825400000	1824800000	1.127	0.91	1.019	0.875	1.034	1.034	0.886	1.10E-01
P61812	Transforming growth factor beta-2	TGFB2	8	47.747	9.9757	20	3	3	3	4	4	3	3	3	3	3	3	3	3	3	3	3	3	3	3	3	109450000	83392000	105850000	100320000	103960000	96530000	1.095	0.835	1.059	1.004	1.04	0.966	0.878	7.28E-02
P61916	Epididymal secretory protein E1	NPC2	67.5	16.57	34.255	77	9	9	11	13	14	14	14	11	9	9	9	9	9	9	9	9	9	9	9	9	2282700000	1961300000	2291600000	1950400000	2409500000	2053600000	1.058	0.909	1.062	0.904	1.116	0.952	0.854	2.92E-03
P61923	Coatomer subunit zeta-1	COPZ1	39.5	20.198	41.148	45	5	5	7	8	7	8	7	8	5	5	5	5	5	5	5	5	5	5	5	5	955460000	1142000000	1020400000	1137200000	1094800000	1097800000	0.889	1.063	0.95	1.058	1.019	1.022	1.1	7.47E-02
P61956	Small ubiquitin-related modifier 2	SUMO2	23.2	10.871	4.0105	12	2	1	2	2	2	2	2	2	2	2	2	2	2	2	1	1	1	1	1	1	448170000	591990000	461180000	488470000	300350000	469070000	0.975	1.287	1.003	1.062	0.653	1.02	1.281	1.52E-01
P61960	Ubiquitin-fold modifier 1	UFM1	58.8	9.1175	9.9903	21	3	3	2	4	3	4	4	4	3	3	3	3	3	3	3	3	3	3	3	3	326440000	363800000	321550000	335650000	319110000	325090000	0.983	1.096	0.969	1.011	0.961	0.979	1.059	1.79E-01
P61962	DDB1- and CUL4-associated factor 7	DCAF7	29.2	38.926	53.228	42	8	8	6	8	7	6	8	7	8	8	8	8	8	8	8	8	8	8	8	8	245640000	292660000	264580000	294290000	254630000	310550000	0.887	1.056	0.955	1.062	0.919	1.121	1.173	5.02E-03
P61964	WD repeat-containing protein 5	WDR5	48.5	36.588	59.694	87	12	12	13	14	16	16	15	13	9	11	10	11	10	10	9	11	10	11	10	10	796340000	732360000	855730000	702670000	789850000	795520000	1.023	0.94	1.099	0.902	1.014	1.022	0.913	1.11E-01
P61966	AP-1 complex subunit sigma-1A	AP1S1	43.7	18.733	66.071	20	6	6	3	4	2	4	3	4	5	5	5	6	6	4	5	5	5	6	6	4	218270000	218370000	197750000	246990000	235430000	249690000	0.958	0.959	0.868	1.084	1.034	1.096	1.098	2.25E-01
P61970	Nuclear transport factor 2	NUTF2	70.1	14.478	71.402	34	4	4	4	8	5	6	4	7	3	4	4	4	3	4	3	4	4	4	3	4	562920000	701530000	545210000	793970000	695680000	715900000	0.841	1.048	0.815	1.186	1.04	1.07	1.226	7.06E-02
P61978	Heterogeneous nuclear ribonucleoprotein K	HNRNPK	56.4	50.976	169.01	371	21	21	57	66	59	71	58	60	21	20	20	20	20	19	21	20	20	20	20	19	28035000000	28410000000	27577000000	28089000000	27872000000	28132000000	1.001	1.014	0.984	1.002	0.995	1.004	1.014	8.47E-02
P61981	14-3-3 protein gamma	YWHAG	73.7	28.302	116.6	123	15	11	19	25	19	22	18	20	14	14	15	14	15	14	10	10	11	10	11	10	5647700000	7308300000	5817900000	6592900000	5143100000	6333300000	0.92	1.19	0.947	1.074	0.838	1.031	1.218	2.72E-02
P62070	Ras-related protein R-Ras2	RRAS2	43.1	23.399	88.525	70	8	6	13	10	10	13	12	12	8	8	6	7	6	7	6	6	5	5	5	6	1357000000	771920000	1321000000	757670000	1323100000	775630000	1.291	0.734	1.257	0.721	1.259	0.738	0.576	8.07E-07
P62072	Mitochondrial import inner membrane translocase subunit Tim10	TIMM10	40	10.333	15.37	23	5	5	5	3	4	3	3	5	5	4	4	4	5	5	5	4	4	4	5	5	613070000	539520000	627980000	491780000	667610000	539830000	1.057	0.93	1.083	0.848	1.151	0.931	0.823	7.84E-03
P62081	40S ribosomal protein S7	RPS7	67.5	22.127	78.472	85	11	11	11	14	13	15	15	17	11	11	11	10	11	11	11	11	11	10	11	11	9200400000	10074000000	8677600000	10807000000	8829100000	9264600000	0.971	1.063	0.916	1.141	0.932	0.978	1.129	7.20E-02
P62136	Serine/threonine-protein phosphatase PP1-alpha catalytic subunit	PPP1CA	73.9	37.512	151.49	240	21	6	40	41	43	40	39	37	21	20	21	18	19	19	6	6	6	5	6	5	9225800000	9063800000	9753800000	9047500000	9057800000	9854600000	0.988	0.971	1.045	0.969	0.97	1.056	0.997	9.47E-01
P62140	Serine/threonine-protein phosphatase PP1-beta catalytic subunit	PPP1CB	71.9	37.186	91.856	57	20	9	10	9	9	10	8	11	17	17	18	17	16	19	6	6	7	6	5	8	1221900000	1450300000	1252000000	1332500000	1178100000	1171700000	0.964	1.144	0.988	1.051	0.929	0.924	1.083	2.94E-01
P62158	Calmodulin	CALM1	56.4	16.837	107.43	135	8	8	18	27	18	28	20	24	7	8	8	8	8	8	7	8	8	8	8	8	11101000000	12896000000	11436000000	13963000000	11359000000	13211000000	0.9	1.046	0.928	1.133	0.921	1.072	1.182	3.46E-03
P62166	Neuronal calcium sensor 1	NCS1	36.8	21.878	19.896	27	6	6	5	3	4	5	4	6	6	6	5	5	5	6	6	6	5	5	5	6	405310000	319700000	337740000	318020000	332980000	298880000	1.208	0.953	1.007	0.948	0.993	0.891	0.87	1.28E-01
P62191	26S protease regulatory subunit 4	PSMC1	60.9	49.184	163.14	218	23	23	33	40	36	37	36	36	23	23	22	23	22	23	23	23	22	23	22	23	5378100000	5991200000	5393500000	6410800000	5492700000	5791500000	0.936	1.043	0.939	1.116	0.956	1.008	1.119	2.59E-02
P62195	26S protease regulatory subunit 8	PSMC5	68.5	45.626	224.39	218	24	23	34	38	36	40	33	37	24	23	24	24	24	23	23	22	23	23	23	22	4112300000	4446700000	4228600000	4344900000	4210300000	4726300000	0.946	1.023	0.973	1	0.969	1.088	1.077	5.44E-02
P62241	40S ribosomal protein S8	RPS8	55.3	24.205	119.42	131	11	11	23	22	18	22	23	23	11	11	11	10	11	11	11	11	11	10	11	11	7042000000	8541600000	7336500000	9057200000	6949700000	8608400000	0.889	1.078	0.926	1.143	0.877	1.087	1.229	1.24E-03
P62244	40S ribosomal protein S15a	RPS15A	51.5	14.839	45.532	97	6	6	17	18	14	18	15	15	6	6	6	6	6	6	6	6	6	6	6	6	2360300000	2824500000	2444300000	3032200000	2450300000	2912500000	0.884	1.058	0.915	1.135	0.917	1.091	1.209	1.64E-03
P62249	40S ribosomal protein S16	RPS16	68.5	16.445	23.855	121	13	13	19	22	16	20	23	21	13	12	13	13	12	12	13	12	13	13	12	12	5209000000	5275300000	5326500000	5367000000	5038500000	5720900000	0.979	0.991	1.001	1.008	0.947	1.075	1.051	1.74E-01
P62253	Ubiquitin-conjugating enzyme E2 G1	UBE2G1	23.5	19.509	16.994	16	3	3	1	3	3	3	3	3	3	3	3	3	3	3	3	3	3	3	3	3	108200000	177660000	104220000	193460000	117240000	156540000	0.757	1.243	0.729	1.354	0.821	1.096	1.601	4.38E-03
P62258	14-3-3 protein epsilon	YWHAE	71	29.174	141.96	310	17	14	47	57	46	54	45	61	17	17	17	17	17	17	14	14	14	14	14	14	21427000000	25660000000	22362000000	25044000000	21540000000	27417000000	0.896	1.073	0.935	1.048	0.901	1.147	1.196	5.18E-03
P62263	40S ribosomal protein S14	RPS14	63.6	16.273	99.66	108	7	7	21	19	16	19	16	17	7	7	7	7	7	7	7	7	7	7	7	7	4562400000	6209800000	4871800000	5546700000	4268500000	5900700000	0.873	1.188	0.932	1.061	0.817	1.129	1.289	7.02E-03
P62266	40S ribosomal protein S23	RPS23	49	15.807	45.876	78	7	7	17	12	14	12	12	11	7	7	7	7	7	7	7	7	7	7	7	7	2638300000	2633400000	2792300000	2774000000	2820200000	2551600000	0.977	0.975	1.034	1.027	1.044	0.944	0.965	3.22E-01
P62269	40S ribosomal protein S18	RPS18	52	17.718	26.154	88	10	10	14	14	16	15	15	14	10	10	10	10	10	10	10	10	10	10	10	10	3876500000	4627600000	4012700000	4481000000	4000400000	4884400000	0.899	1.073	0.93	1.039	0.927	1.132	1.177	5.06E-03
P62273	40S ribosomal protein S29	RPS29	32.1	6.6767	16.546	18	2	2	4	2	2	2	2	6	2	1	1	1	1	2	2	1	1	1	1	2	333100000	344280000	304980000	296250000	298980000	415240000	1.003	1.037	0.918	0.892	0.9	1.25	1.127	3.35E-01
P62277	40S ribosomal protein S13	RPS13	52.3	17.222	20.691	86	9	9	14	14	14	17	14	13	9	9	9	9	9	9	9	9	9	9	9	9	5548100000	6588700000	5890200000	6864200000	5604400000	6452100000	0.901	1.07	0.957	1.115	0.91	1.048	1.168	4.06E-03
P62280	40S ribosomal protein S11	RPS11	60.8	18.431	60.585	119	13	13	17	23	18	21	18	22	13	13	13	13	13	13	13	13	13	13	13	13	5313400000	6732700000	5478600000	6353800000	5508500000	6655100000	0.885	1.121	0.912	1.058	0.917	1.108	1.211	9.22E-04
P62304	Small nuclear ribonucleoprotein E	SNRPE	65.2	10.803	28.507	50	4	4	8	7	11	9	7	8	4	4	4	4	4	4	4	4	4	4	4	4	1890200000	2136500000	2144200000	2328800000	2271900000	1916400000	0.894	1.01	1.014	1.101	1.074	0.906	1.012	8.85E-01
P62306	Small nuclear ribonucleoprotein F	SNRPF	74.4	9.7251	7.8559	18	5	5	2	3	3	3	3	4	3	4	3	3	5	4	3	4	3	3	5	4	487750000	572050000	511080000	674000000	512200000	691330000	0.849	0.995	0.889	1.173	0.891	1.203	1.282	2.02E-02
P62308	Small nuclear ribonucleoprotein G	SNRPG	25	8.496	4.3581	21	2	2	2	5	4	4	3	3	2	2	2	2	2	2	2	2	2	2	2	2	1827700000	1802900000	1685800000	1668000000	1783400000	1516300000	1.066	1.052	0.984	0.973	1.04	0.885	0.942	3.28E-01
P62310	U6 snRNA-associated Sm-like protein LSm3	LSM3	40.2	11.845	8.4929	15	3	3	2	3	2	2	3	3	3	3	3	3	3	3	3	3	3	3	3	3	327340000	345910000	327170000	327310000	309250000	309490000	1.009	1.066	1.009	1.009	0.953	0.954	1.02	6.29E-01
P62312	U6 snRNA-associated Sm-like protein LSm6	LSM6	33.8	9.1275	5.5987	13	3	3	2	2	2	2	2	3	3	3	3	3	3	3	3	3	3	3	3	3	288760000	267980000	266260000	284810000	262850000	288110000	1.044	0.969	0.963	1.03	0.951	1.042	1.028	4.95E-01
P62314	Small nuclear ribonucleoprotein Sm D1	SNRPD1	54.6	13.281	138.8	84	5	5	10	15	12	18	12	17	5	5	5	5	5	5	5	5	5	5	5	5	3364100000	3825000000	3514400000	3308100000	3510600000	3681700000	0.952	1.082	0.994	0.936	0.993	1.042	1.041	4.30E-01
P62316	Small nuclear ribonucleoprotein Sm D2	SNRPD2	55.1	13.527	60.652	128	7	7	22	21	18	19	23	25	7	7	7	7	7	7	7	7	7	7	7	7	3650800000	3827900000	4144400000	4374200000	3763700000	3947400000	0.924	0.969	1.049	1.107	0.952	0.999	1.051	4.27E-01
P62318	Small nuclear ribonucleoprotein Sm D3	SNRPD3	53.2	13.916	66.641	83	5	5	12	18	12	15	11	15	5	5	5	5	5	5	5	5	5	5	5	5	6928900000	7722800000	6565200000	8595400000	7293900000	8115700000	0.919	1.025	0.871	1.14	0.968	1.077	1.175	2.08E-02
P62330	ADP-ribosylation factor 6	ARF6	21.1	20.082	15.776	27	3	3	5	4	5	5	4	4	3	3	3	3	3	3	3	3	3	3	3	3	376040000	568820000	513860000	387970000	413290000	564760000	0.799	1.208	1.091	0.824	0.878	1.2	1.168	3.72E-01
P62333	26S protease regulatory subunit 10B	PSMC6	56.6	44.172	98.932	122	16	16	20	22	18	23	19	20	16	16	16	16	16	16	16	16	16	16	16	16	2444900000	2729300000	2540400000	2774200000	2417000000	2610600000	0.945	1.055	0.982	1.073	0.935	1.009	1.096	1.81E-02
P62341	Selenoprotein T	SELT	32.3	22.324	17.922	20	5	5	3	2	6	2	5	2	5	4	5	4	5	4	5	4	5	4	5	4	186590000	135790000	187670000	136450000	206870000	164120000	1.1	0.801	1.107	0.805	1.22	0.968	0.751	1.34E-02
P62424	60S ribosomal protein L7a	RPL7A	53.8	29.995	119.42	194	17	17	30	33	33	35	33	30	17	16	17	16	17	17	17	16	17	16	17	17	10514000000	9978400000	10233000000	9846500000	10375000000	10358000000	1.029	0.977	1.002	0.964	1.015	1.014	0.97	1.45E-01
P62487	DNA-directed RNA polymerase II subunit RPB7	POLR2G	27.3	19.294	15.456	18	3	3	3	3	2	3	3	4	2	3	2	3	2	3	2	3	2	3	2	3	142930000	116300000	164570000	142950000	159470000	180620000	0.946	0.769	1.089	0.946	1.055	1.195	0.942	6.71E-01
P62491	Ras-related protein Rab-11A	RAB11A	63.4	24.393	14.526	20	14	2	5	1	5	3	5	1	13	13	14	13	14	14	2	1	2	1	2	2	295660000	0	353680000	91037000	337120000	73682000	1.284		1.536	0.395	1.464	0.32	0.25	1.78E-03
P62495	Eukaryotic peptide chain release factor subunit 1	ETF1	43.9	49.03	124.7	89	15	15	11	17	13	17	13	18	15	15	15	14	15	15	15	15	15	14	15	15	1379300000	1419200000	1426600000	1548500000	1363200000	1563200000	0.951	0.979	0.984	1.068	0.94	1.078	1.087	7.17E-02
[truncated: 3,306 more rows]
