# Supplementary material for: Proteome and phosphoproteome reveal mechanisms of action of atorvastatin against esophageal squamous cell carcinoma
Source: Aging (Albany NY). 2019 Nov 7;11(21):9530–43. doi: 10.18632/aging.102402 (PMC6874460; doi:10.18632/aging.102402)
Supplement: Supplementary Table 2 [file aging-11-102402-s004.csv]

Identified ST protein information												Phosphorylation						Proteomics						Normalized with proteomics						Quantitation of sample
Protein accession	Position	Amino acid	Protein description	Gene name	Localization probability	PEP	Score	Modified sequence	Charge	Mass error [ppm]	MS/MS Count	Ctr_rep1	Ctr_rep2	Ctr_rep3	YA1_rep1	YA1_rep2	YA1_rep3	Ctr_rep1	Ctr_rep2	Ctr_rep3	YA1_rep1	YA1_rep2	YA1_rep3	Ctr_rep1	Ctr_rep2	Ctr_rep3	YA1_rep1	YA1_rep2	YA1_rep3	YA1/Ctr Ratio	YA1/Ctr P value
A0AV96	519	T	RNA-binding protein 47	RBM47	1	2.39E-15	130.95	PIT(1)PVYTVAPNVQR	2	-0.56865	6	1.201	1.097	0.89	0.831	0.991	0.99	0.943	0.985	0.999	0.939	1.063	1.070	1.274	1.114	0.891	0.885	0.932	0.925	0.837	1.86E-01
A0AVK6	71	S	Transcription factor E2F8	E2F8	0.987854	1.93E-05	94.09	MLIS(0.012)AVS(0.988)PEIR	2	0.60656	1	1.264		0.942	0.793
A0FGR8	738	S	Extended synaptotagmin-2	ESYT2	0.845962	2.77E-07	104.76	S(0.023)S(0.023)S(0.846)S(0.1)LLAS(0.008)PGHISVK	3	0.059565	14	1.243	0.874	0.768	1.287		0.827	1.061	1.011	1.075	0.991	0.914	0.948	1.172	0.864	0.714	1.299		0.872	1.184	5.25E-01
A0FGR8	755	S	Extended synaptotagmin-2	ESYT2	0.966286	7.42E-13	97.771	EPT(0.829)PS(0.966)IAS(0.282)DIS(0.921)LPIAT(0.002)QELR	2	1.4709	33	1.385	1.409	1.274	0.28	1.409	0.243	1.061	1.011	1.075	0.991	0.914	0.948	1.305	1.394	1.185	0.283	1.542	0.256	0.536	2.33E-01
A0FGR8	758	S	Extended synaptotagmin-2	ESYT2	0.961268	1.04E-10	90.946	EPT(0.748)PS(0.291)IAS(0.961)DIS(0.999)LPIATQELR	2	0.91995	20	1.828	0.613	0.572	1.218	0.768	1.001	1.061	1.011	1.075	0.991	0.914	0.948	1.723	0.606	0.532	1.229	0.840	1.056	1.092	8.37E-01
A0FGR8	761	S	Extended synaptotagmin-2	ESYT2	0.999454	7.42E-13	97.771	EPT(0.748)PS(0.291)IAS(0.961)DIS(0.999)LPIATQELR	2	0.91995	41	1.008	1.026	0.878	1.024	1.064	1	1.061	1.011	1.075	0.991	0.914	0.948	0.950	1.015	0.817	1.033	1.164	1.055	1.169	9.17E-02
A0FGR8	753	T	Extended synaptotagmin-2	ESYT2	0.982038	2.86E-17	120.25	EPT(0.982)PS(0.952)IAS(0.091)DIS(0.975)LPIAT(0.001)QELR	2	0.74076	29	0.498	1.254	1.216	1.518	0.96	0.554	1.061	1.011	1.075	0.991	0.914	0.948	0.469	1.240	1.131	1.532	1.050	0.584	1.115	7.81E-01
A0JLT2	194	S	Mediator of RNA polymerase II transcription subunit 19	MED19	0.784791	1.01E-06	80.752	TQDPVPPET(0.055)PS(0.785)DS(0.16)DHKK	3	0.31791	8	1.679		0.709	0.902		0.71			0.962	0.923	1.115				0.737	0.977			1.326
A0JLT2	226	S	Mediator of RNA polymerase II transcription subunit 19	MED19	0.999986	1.35E-18	122.53	NRHS(1)PDHPGMGSSQASSSSSLR	4	0.11442	18	0.837	0.722	1.081	1.015	1.285	1.059			0.962	0.923	1.115				1.124	1.100	1.152		1.002
A0JNW5	418	S	UHRF1-binding protein 1-like	UHRF1BP1L	0.969156	1.49E-28	129.5	DHNVGSPPKS(0.969)PT(0.031)HASPQHTQTEK	4	0.69137	6	0.889	1.198	1.103	0.643	1.166		0.918	1.052	1.030				0.968	1.139	1.071
A0JNW5	414	S	UHRF1-binding protein 1-like	UHRF1BP1L	1	2.52E-10	80.871	DHNVGS(1)PPK	2	0.54312	11	1.339	0.765		1.236	1.443	0.217	0.918	1.052	1.030				1.459	0.727
A1A4S6	591	S	Rho GTPase-activating protein 10	ARHGAP10	0.808012	1.79E-22	111.55	TPPDTTFPEPT(0.055)CLS(0.137)AS(0.808)PPNAPPR	3	0.82248	10	1.091	0.786	1.022	1.032		1.068
A1L170	237	S	Uncharacterized protein C1orf226	C1orf226	0.845356	7.03E-10	70.145	LS(0.149)LS(0.845)PIS(0.006)LAES(0.04)WEDGS(0.96)PPPQAR	3	0.65074	3	1.138		0.625		1.241	0.997	0.958	0.895	1.039		1.115	0.993	1.188		0.602		1.113	1.004	1.183	6.38E-01
A1L170	249	S	Uncharacterized protein C1orf226	C1orf226	1	1.32E-14	97.542	LSLSPISLAESWEDGS(1)PPPQAR	3	0.15159	14	1.156	0.654	0.98	1.106	1.015	1.089	0.958	0.895	1.039		1.115	0.993	1.207	0.731	0.943		0.910	1.097	1.045	8.35E-01
A1L170	223	S	Uncharacterized protein C1orf226	C1orf226	0.999883	3.42E-10	116.36	ASS(1)PSLIER	2	0.114	8	0.858		0.632	1.13	1.241	1.139	0.958	0.895	1.039		1.115	0.993	0.896		0.608		1.113	1.147	1.503	1.21E-01
A1L390	1169	S	Pleckstrin homology domain-containing family G member 3	PLEKHG3	0.804972	2.47E-38	110.78	GPLPSPTAGLEES(0.002)S(0.002)GQGPS(0.19)S(0.805)PVALLGQVQDFQQSAECQPK	4	0.18997	3	1.408		0.625		0.968		1.048	0.854	0.894	1.124	1.132	0.947	1.344		0.699		0.855		0.837
A1L390	577	S	Pleckstrin homology domain-containing family G member 3	PLEKHG3	0.998653	6.91E-12	61.876	ALS(0.999)S(0.999)EEEEEMGGAAQEPES(0.003)LLPPSVLDQASVIAER	3	0.32381	5	1.062		0.718	1.356		0.864	1.048	0.854	0.894	1.124	1.132	0.947	1.013		0.803	1.206		0.912	1.166	4.91E-01
A1L390	827	S	Pleckstrin homology domain-containing family G member 3	PLEKHG3	0.947173	3.92E-03	50.117	IWEGMES(0.016)S(0.037)GGS(0.947)PGK	2	2.0573	1	0.877	1.16	0.735	1.034		1.195	1.048	0.854	0.894	1.124	1.132	0.947	0.837	1.358	0.822	0.920		1.262	1.085	7.66E-01
A1L390	1037	S	Pleckstrin homology domain-containing family G member 3	PLEKHG3	1	1.73E-49	185.2	S(1)PLS(1)PTETFSWPDVR	2	-0.40403	15	0.534	0.72	0.67	1.424	1.393	1.258	1.048	0.854	0.894	1.124	1.132	0.947	0.510	0.843	0.749	1.267	1.231	1.328	1.820	5.12E-03
A1L390	76	S	Pleckstrin homology domain-containing family G member 3	PLEKHG3	1	3.67E-10	165.78	GPLS(1)PFNSR	2	0.017603	11	0.558	0.503	0.381	1.412	1.79	1.355	1.048	0.854	0.894	1.124	1.132	0.947	0.532	0.589	0.426	1.256	1.581	1.431	2.758	1.00E-03
A1L390	423	S	Pleckstrin homology domain-containing family G member 3	PLEKHG3	0.995241	4.13E-02	55.046	Y(0.005)RCS(0.995)PER	2	-0.19473	1		0.921	1.321	0.956	1.05	0.752	1.048	0.854	0.894	1.124	1.132	0.947		1.078	1.478	0.851	0.928	0.794	0.671	7.50E-02
A1L390	576	S	Pleckstrin homology domain-containing family G member 3	PLEKHG3	0.998554	6.91E-12	61.876	ALS(0.999)S(0.999)EEEEEMGGAAQEPES(0.003)LLPPSVLDQASVIAER	3	0.32381	5	1.062		0.718	1.356		0.864	1.048	0.854	0.894	1.124	1.132	0.947	1.013		0.803	1.206		0.912	1.166	4.91E-01
A1L390	1040	S	Pleckstrin homology domain-containing family G member 3	PLEKHG3	0.999985	1.73E-49	185.2	S(1)PLS(1)PTETFSWPDVR	2	-0.40403	17	0.683	0.583	0.602	1.443	1.416	1.273	1.048	0.854	0.894	1.124	1.132	0.947	0.652	0.683	0.673	1.284	1.251	1.344	1.932	2.70E-05
A2AJT9	402	S	Uncharacterized protein CXorf23	CXorf23	1	5.81E-04	66.509	LPDVKPS(1)PINLR	3	-0.16616	2	1.442	1.11	0.861	0.716	0.962	0.909
A2AJT9	17	S	Uncharacterized protein CXorf23	CXorf23	1	1.03E-03	88.37	S(1)LS(1)PVPR	2	-0.69894	19	0.784	1.049	1.004	0.87	1.337	0.955
A2AJT9	15	S	Uncharacterized protein CXorf23	CXorf23	1	1.03E-03	76.24	S(1)LS(1)PVPR	2	-0.69894	11	0.715	1.1	1.024	1.003	1.305	0.853
A2RU67	33	S	Protein FAM234B	FAM234B	0.993591	6.92E-31	123.29	SPDLGEYDPLT(0.013)QADS(0.994)DES(0.994)EDDLVLNLQK	3	0.035039	9	1.533	0.595	0.636	1.541		0.696	1.000	1.059	1.229	0.928	0.963	0.821	1.533	0.562	0.517	1.661		0.848	1.440	5.17E-01
A2RU67	30	S	Protein FAM234B	FAM234B	0.993591	6.92E-31	123.29	SPDLGEYDPLT(0.013)QADS(0.994)DES(0.994)EDDLVLNLQK	3	0.035039	8	1.152	0.89	0.951	1.055	0.911	1.04	1.000	1.059	1.229	0.928	0.963	0.821	1.152	0.840	0.774	1.137	0.946	1.267	1.211	2.62E-01
A2RU67	62	S	Protein FAM234B	FAM234B	0.923964	3.94E-20	80.319	SPLGEAPEPDS(0.924)DAEVAEAAKPHLS(0.024)EVT(0.024)T(0.024)EGY(0.003)PSEPLGGLEQK	4	-0.075446	6	1.277	1.189	0.914	0.62			1.000	1.059	1.229	0.928	0.963	0.821	1.277	1.123	0.744	0.668			0.638
A3KN83	214	S	Protein strawberry notch homolog 1	SBNO1	0.966628	4.13E-02	53.965	S(0.001)FS(0.967)PT(0.032)MK	2	-0.11372	2	0.561		0.722		1.716		0.995	0.813	0.618	1.232	1.369	0.973	0.564		1.168		1.253		1.447
A5YM69	445	S	Rho guanine nucleotide exchange factor 35	ARHGEF35	0.999947	1.18E-09	108.63	AEELS(1)PAALSPLLEPIR	2	1.6598	1	0.861			1.139
A5YM69	184	S	Rho guanine nucleotide exchange factor 35	ARHGEF35	0.977509	1.14E-15	90.397	Y(0.011)Y(0.011)S(0.978)PCEEHPAETNQNEGAESGTIR	3	1.7111	6	0.965	0.89		1.036	1.075	1.033
A6ND36	356	S	Protein FAM83G	FAM83G	1	4.30E-05	109.6	AKS(1)VDEIAK	2	0.52918	5	0.545	0.626	0.67	1.404	1.643	1.112	0.746	0.676	0.930	1.308	0.915	1.426	0.731	0.926	0.720	1.073	1.796	0.780	1.535	2.42E-01
A6ND36	127	S	Protein FAM83G	FAM83G	1	5.34E-11	115.42	S(1)IPQLDLGWPDTIAYR	2	1.4011	12	0.87	1.031	0.836	1.123	1.162	0.978	0.746	0.676	0.930	1.308	0.915	1.426	1.166	1.525	0.899	0.859	1.270	0.686	0.784	3.61E-01
A6ND36	4	S	Protein FAM83G	FAM83G	1	2.54E-08	108.58	AFS(1)QVQCLDDNHVNWR	3	0.33608	8	0.714	0.827	0.799	1.279	1.278	1.103	0.746	0.676	0.930	1.308	0.915	1.426	0.957	1.223	0.859	0.978	1.397	0.773	1.036	8.74E-01
A6NFI3	10	S	Zinc finger protein 316	ZNF316	0.999757	2.79E-42	169.43	AALHTTPDS(1)PAAQLER	2	-0.096632	14	1.564	0.819	1.068	0.892	0.733	0.924	1.223	0.970	1.275	1.101	0.637	0.795	1.279	0.844	0.838	0.810	1.151	1.162	1.055	7.86E-01
A6NGC4	235	S	TLC domain-containing protein 2	TLCD2	1	5.99E-06	59.13	PHPPS(1)PGHEK	3	-0.26031	3	0.625	1.567		1.47	0.535	0.802
A6NHR9	1974	S	Structural maintenance of chromosomes flexible hinge domain-containing protein 1	SMCHD1	0.99895	2.06E-03	69.345	CNDS(0.001)LRHS(0.999)PK	2	2.3707	1		1.229	1.452		1.036	0.283	1.036	1.034	1.004	0.999	0.958	0.969		1.189	1.446		1.081	0.292	0.521	2.68E-01
A6NIE6	44	S	Putative RRN3-like protein RRN3P2	RRN3P2	1	2.86E-04	64.52	ALENDFFNS(1)PPRK	3	0.80763	6	1.438		0.765	0.897	0.9
A6NJL1	295	S	Zinc finger and SCAN domain-containing protein 5B	ZSCAN5B	0.816436	9.22E-06	103.67	GDALNLS(0.184)S(0.816)PKR	3	0.5387	10	1.119	1.407	1.098	0.553	1.271	0.551
A6NKD9	246	S	Coiled-coil domain-containing protein 85C	CCDC85C	1	1.66E-14	132.97	S(1)LDDLSAPPHHR	2	1.095	22	0.916	0.922	0.87	1.024	1.343	0.925	0.788	1.025	0.799	1.214	1.060	1.115	1.162	0.900	1.089	0.843	1.267	0.830	0.933	6.90E-01
A6NKF1	402	S	SAC3 domain-containing protein 1	SAC3D1	0.982983	2.19E-04	40.625	TLEEVVMAEEEDEGT(0.017)DRPGS(0.983)PA	3	-2.0375	1	1.078			0.767	1.156
A7E2S9	5	S	Putative ankyrin repeat domain-containing protein 30B-like	ANKRD30BL	1	7.72E-02	40.067	LS(1)AAPVK	2	-0.060541	1	1.34	0.885	0.855	0.92
A7KAX9	892	S	Rho GTPase-activating protein 32	ARHGAP32	1	1.22E-03	88.596	VVYAFS(1)PK	2	0.19855	10	0.885	0.561	0.526	1.48	1.207	1.341						1.000						1.341
A7KAX9	952	S	Rho GTPase-activating protein 32	ARHGAP32	0.966006	4.06E-14	128.74	DAT(0.025)NRS(0.966)PT(0.009)QIVK	2	-0.66548	3	1.206	0.986	1.074	0.96	1.033	0.741						1.000						0.741
A7KAX9	1203	S	Rho GTPase-activating protein 32	ARHGAP32	0.999736	6.64E-05	55.621	NSMPTVSFLDQDQS(1)PPR	2	-0.0014656	4	1.142	0.806			1.052							1.000
A7KAX9	706	S	Rho GTPase-activating protein 32	ARHGAP32	0.988517	1.64E-26	140.07	S(0.011)AKS(0.989)EESLTSLHAVDGDSK	3	1.4614	9	1.217	1.125	1.162	0.884	0.842	0.77						1.000						0.770
A7KAX9	856	S	Rho GTPase-activating protein 32	ARHGAP32	0.998224	8.98E-14	81.297	DAETGSSQCQTPGSTASS(0.001)EPVS(0.998)PLQEK	3	-0.33389	4			1.184	1.154	0.898	0.764						1.000						0.764
A8CG34	424	T	Nuclear envelope pore membrane protein POM 121C	POM121C	0.997246	4.38E-03	84.999	S(0.003)QT(0.997)PERPAK	2	1.2803	4	1.288	1.573	1.411	0.753	0.656	0.319	1.123	1.047	1.076	0.965	0.886	0.903	1.147	1.502	1.311	0.780	0.740	0.353	0.473	1.51E-02
A8CG34	358	S	Nuclear envelope pore membrane protein POM 121C	POM121C	0.9669	4.32E-05	80.738	GLNSQS(0.033)S(0.967)DDHLNKR	3	-0.46998	1	0.633	1.415	2.172	0.301	0.405	1.073	1.123	1.047	1.076	0.965	0.886	0.903	0.564	1.351	2.019	0.312	0.457	1.188	0.498	2.58E-01
A8MT19	551	S	Putative rhophilin-2-like protein RHPN2P1	RHPN2P1	0.771459	2.95E-05	88.427	S(0.038)AS(0.771)T(0.19)LCLPSVGAAR	2	0.31817	1	1.288	1.153		0.899		0.66				1.000						0.899
C9JLW8	21	S	Mapk-regulated corepressor-interacting protein 1	MCRIP1	0.999129	8.21E-37	168.81	S(0.999)PPS(0.001)SSEIFTPAHEENVR	3	-0.096224	18	0.991	0.987	0.906	0.899	1.308	0.908	0.901	1.291	0.750		1.107	0.951	1.100	0.765	1.208		1.182	0.955	1.043	8.33E-01
O00148	171	T	ATP-dependent RNA helicase DDX39A	DDX39A	1	2.98E-05	80.719	NCPHVVVGT(1)PGR	3	-2.213	4		1.169	1.079			0.752	0.889	0.922	0.969	1.053	1.016	1.152		1.268	1.114			0.653	0.548
O00151	90	S	PDZ and LIM domain protein 1	PDLIM1	1	3.39E-20	157.86	VWS(1)PLVTEEGKR	3	-0.47765	30	0.809	0.846	0.796	1.211	1.315	1.021	0.787	0.857	0.809	1.209	1.180	1.158	1.028	0.987	0.984	1.002	1.114	0.882	1.000	9.95E-01
O00151	316	T	PDZ and LIM domain protein 1	PDLIM1	0.99981	2.53E-04	57.238	ERVT(1)PPEGYEVVTVFPK	3	0.12605	2	0.362			1.824	0.623	1.191	0.787	0.857	0.809	1.209	1.180	1.158	0.460			1.509	0.528	1.028	2.221
O00159	408	S	Unconventional myosin-Ic	MYO1C	0.999783	9.53E-04	128.27	DVES(1)PSWR	2	0.40281	9	0.68	0.628	0.665	1.416	1.484	1.128	0.683	0.736	0.703	1.233	1.305	1.340	0.996	0.853	0.946	1.148	1.137	0.842	1.119	3.66E-01
O00159	864	S	Unconventional myosin-Ic	MYO1C	0.999992	6.28E-04	98.009	SIS(1)PEWK	2	0.2598	9	0.702		0.762	1.22	1.3	1.016	0.683	0.736	0.703	1.233	1.305	1.340	1.028		1.084	0.989	0.996	0.758	0.866	2.64E-01
O00161	110	S	Synaptosomal-associated protein 23	SNAP23	0.99996	3.40E-09	104.18	TTWGDGGENS(1)PCNVVSK	2	-0.90146	13	0.976	0.975	1.095	1.011	0.948	0.995	0.985	0.972	1.106	0.987	1.046	0.903	0.991	1.003	0.990	1.024	0.906	1.102	1.016	7.91E-01
O00192	642	T	Armadillo repeat protein deleted in velo-cardio-facial syndrome	ARVCF	1	8.21E-03	77.358	NFDT(1)LDLPK	2	0.080336	3	1.172	0.947	1.295	0.658	0.927		1.058	1.117	1.038	0.938	0.840	1.009	1.108	0.848	1.248	0.701	1.104		0.845	4.94E-01
O00192	335	S	Armadillo repeat protein deleted in velo-cardio-facial syndrome	ARVCF	0.998141	6.12E-03	66.603	GS(0.002)MGS(0.998)LDR	2	-0.13274	6	1.137	1.046	1.029	0.983	0.672	1.133	1.058	1.117	1.038	0.938	0.840	1.009	1.075	0.936	0.991	1.048	0.800	1.123	0.989	9.25E-01
O00192	267	S	Armadillo repeat protein deleted in velo-cardio-facial syndrome	ARVCF	1	1.73E-30	143.29	S(1)LAADDEGGPELEPDYGTATR	2	-1.5993	7	1.309	1.146	1.052	0.93	0.77	0.793	1.058	1.117	1.038	0.938	0.840	1.009	1.237	1.026	1.013	0.991	0.917	0.786	0.822	1.08E-01
O00192	343	S	Armadillo repeat protein deleted in velo-cardio-facial syndrome	ARVCF	0.925543	4.62E-05	125.89	RS(0.926)PS(0.074)VDSAR	2	-1.1571	2		0.666	1.452	0.993	1.05	0.839	1.058	1.117	1.038	0.938	0.840	1.009		0.596	1.399	1.059	1.250	0.832	1.049	8.93E-01
O00193	17	S	Small acidic protein	SMAP	0.958226	4.95E-46	162.91	S(0.042)AS(0.958)PDDDLGSSNWEAADLGNEER	3	0.52404	20	1.162	0.726	0.976	1.244	0.825	1.067	0.949	0.931	1.010	1.077	0.948	1.085	1.224	0.780	0.966	1.155	0.870	0.983	1.013	9.38E-01
O00203	276	S	AP-3 complex subunit beta-1	AP3B1	1	1.49E-14	135.91	NFYES(1)DDDQKEK	2	-0.10271	22	1.096	0.964	0.772	0.978	0.734	1.455	0.944	0.982	0.886	1.026	1.108	1.053	1.161	0.982	0.871	0.953	0.662	1.382	0.994	9.82E-01
O00203	609	S	AP-3 complex subunit beta-1	AP3B1	1	9.26E-10	106.69	PAPLLES(1)PFKDR	3	-1.0869	9	0.791	0.8	0.813	1.238	1.141	1.216	0.944	0.982	0.886	1.026	1.108	1.053	0.838	0.815	0.918	1.207	1.030	1.155	1.319	1.10E-02
O00257	434	S	E3 SUMO-protein ligase CBX4	CBX4	0.908447	1.45E-07	103.73	S(0.012)IS(0.908)T(0.079)PTCLGGSPAAER	2	-0.1586	2	0.942	0.861	0.965	1.111	1.121	1						1.000						1.000
O00257	467	S	E3 SUMO-protein ligase CBX4	CBX4	1	1.56E-21	82.946	PADLPPAAALPQPEVILLDS(1)DLDEPIDLR	3	0.44652	9	1.253	0.893	0.693	1.341	1.001	0.82						1.000						0.820
O00264	181	S	Membrane-associated progesterone receptor component 1	PGRMC1	0.999978	2.48E-91	212.65	EGEEPTVYS(1)DEEEPKDESAR	3	-0.023743	65	0.976	1.094	0.926	0.967	1.173	0.864	0.986	1.030	1.033	0.959	1.076	0.915	0.990	1.062	0.896	1.008	1.090	0.944	1.032	6.48E-01
O00264	57	S	Membrane-associated progesterone receptor component 1	PGRMC1	0.998795	1.75E-30	148.86	IVRGDQPAAS(0.001)GDS(0.999)DDDEPPPLPR	3	-0.13019	66	0.765	0.946	0.944	1.209	1.294	0.842	0.986	1.030	1.033	0.959	1.076	0.915	0.776	0.918	0.914	1.261	1.203	0.920	1.297	8.81E-02
O00267	1034	T	Transcription elongation factor SPT5	SUPT5H	0.993467	2.46E-23	146.78	VVSISSEHLEPIT(0.993)PT(0.007)K	2	0.055097	14	1.404	1.188	0.746	0.8	1.219	0.642	1.025	0.967	1.009	0.977	0.962	1.060	1.370	1.229	0.739	0.819	1.267	0.606	0.806	4.74E-01
O00268	109	S	Transcription initiation factor TFIID subunit 4	TAF4	1	1.82E-03	40.622	ARPGGGGPQRPGPPS(1)PR	3	-0.78989	1		1.15	0.804		1.046		1.003	1.007	1.011	0.947	0.974	1.058		1.142	0.795		1.074		1.109
O00273	315	S	DNA fragmentation factor subunit alpha	DFFA	1	4.54E-05	89.507	AS(1)PPGDLQNPK	2	-1.0462	11	0.831	0.874	1.023	0.761	1.511		1.024	0.851	0.906	1.073	1.045	1.101	0.812	1.027	1.129	0.709	1.446		1.089	7.88E-01
O00303	258	S	Eukaryotic translation initiation factor 3 subunit F	EIF3F	1	4.27E-04	148.14	TCFS(1)PNR	2	-0.30484	11	0.929	1.059	0.777	0.967	1.065	1.204	0.823	0.862	0.901	1.092	1.187	1.135	1.129	1.229	0.862	0.886	0.897	1.061	0.883	3.66E-01
O00308	211	S	NEDD4-like E3 ubiquitin-protein ligase WWP2	WWP2	1	1.46E-21	144.23	TTPATGEQS(1)PGAR	2	2.6772	5	0.519	0.837	0.709	1.01	1.601	1.324	1.058	1.026	0.969	0.909	1.060	0.978	0.491	0.816	0.732	1.111	1.510	1.354	1.951	1.31E-02
O00330	162	S	Pyruvate dehydrogenase protein X component, mitochondrial	PDHX	0.996804	2.60E-06	78.132	PS(0.002)EPRPS(0.997)PEPQIS(0.002)IPVK	3	-0.64685	2		0.851		1.051		1.098	1.045	0.964	1.051	1.018	0.970	0.952		0.883		1.032		1.153	1.238
O00418	445	S	Eukaryotic elongation factor 2 kinase	EEF2K	0.998633	1.38E-03	62.203	ESENSGDS(0.001)GYPS(0.999)EK	2	-0.87701	2	0.837	1.29	0.727	1.146
O00418	474	S	Eukaryotic elongation factor 2 kinase	EEF2K	0.993927	1.24E-08	111.93	KYES(1)DEDS(0.994)LGS(0.004)S(0.002)GR	2	0.56098	5	1.249	0.624	1.242		1.234	0.651
O00429	616	S	Dynamin-1-like protein	DNM1L	1	1.00E-14	130.64	SKPIPIMPAS(1)PQK	2	0.52762	27	0.725	0.919	0.788	0.922	1.474	1.172	0.948	0.942	0.896	1.109	1.063	1.042	0.765	0.976	0.879	0.831	1.387	1.125	1.276	2.33E-01
O00443	259	S	Phosphatidylinositol 4-phosphate 3-kinase C2 domain-containing subunit alpha	PIK3C2A	1	6.25E-10	163.51	VSNLQVS(1)PK	2	-0.39594	5	0.941	0.9	0.954	1.045	1.37	0.79	1.173	1.127	1.122	0.837	0.855	0.886	0.802	0.799	0.850	1.249	1.602	0.892	1.527	1.05E-01
O00499	298	S	Myc box-dependent-interacting protein 1	BIN1	0.846936	5.99E-05	75.911	S(0.153)PS(0.847)PPDGSPAATPEIR	2	0.64207	2	1.007	0.767		1.075	1.15							1.000
O00505	60	S	Importin subunit alpha-4	KPNA3	0.999997	6.83E-13	111.38	NVPQEESLEDS(1)DVDADFK	3	-0.36497	37	1.258	1.227	0.96	0.848	1.07	0.638	0.970	1.089	0.968	0.992	1.052	0.928	1.297	1.127	0.992	0.855	1.017	0.688	0.749	9.29E-02
O00512	278	S	B-cell CLL/lymphoma 9 protein	BCL9	1	2.71E-07	86.182	PAAPPRPLDRES(1)PGVENK	3	-0.14026	2	1.123	0.885			0.992
O00515	123	S	Ladinin-1	LAD1	0.999978	6.74E-11	113.05	LEAEEGRNS(1)LS(1)PVQATQKPLVSK	3	-0.88291	17	0.842	1.337	1.047	0.923	1.205	0.646	0.932	0.913	0.827	1.046	1.079	1.203	0.903	1.464	1.266	0.882	1.117	0.537	0.698	1.95E-01
O00515	272	S	Ladinin-1	LAD1	0.999294	2.45E-32	170.47	ALASEKS(0.999)PT(0.001)ADAK	2	0.28741	20	0.65	0.819	0.738	0.978	1.695	1.12	0.932	0.913	0.827	1.046	1.079	1.203	0.697	0.897	0.892	0.935	1.571	0.931	1.382	2.28E-01
O00515	64	S	Ladinin-1	LAD1	1	1.71E-29	107.75	LPS(1)VEEAEVPKPLPPASKDEDEDIQSILR	3	0.033371	37	0.859	0.666	0.815	1.163	1.278	1.22	0.932	0.913	0.827	1.046	1.079	1.203	0.922	0.729	0.985	1.112	1.184	1.014	1.256	6.99E-02
O00515	121	S	Ladinin-1	LAD1	0.999987	1.79E-10	76.423	LEAEEGRNS(1)LS(1)PVQATQKPLVSK	3	-0.88291	6	0.866	1.41	1.064	0.876	1.183	0.601	0.932	0.913	0.827	1.046	1.079	1.203	0.929	1.544	1.287	0.837	1.096	0.500	0.647	1.50E-01
O00515	356	S	Ladinin-1	LAD1	0.867037	2.22E-42	174.65	IPSKEEEADMS(0.063)S(0.867)PT(0.07)QR	3	0.72194	24	0.691	0.906	0.65	1.176	1.341	1.236	0.932	0.913	0.827	1.046	1.079	1.203	0.741	0.992	0.786	1.124	1.243	1.027	1.347	4.25E-02
O00515	38	S	Ladinin-1	LAD1	0.982176	9.98E-05	80.746	NLS(0.982)S(0.015)T(0.002)T(0.001)DDEAPR	2	-0.42253	6		0.507		1.404		1.089	0.932	0.913	0.827	1.046	1.079	1.203		0.555		1.342		0.905	2.024
O00515	177	S	Ladinin-1	LAD1	1	1.80E-06	107.99	GVPEKS(1)PVLEK	2	0.044139	35	0.872	0.559	0.72	1.433	1.094	1.321	0.932	0.913	0.827	1.046	1.079	1.203	0.936	0.612	0.871	1.370	1.014	1.098	1.440	7.20E-02
O00515	301	S	Ladinin-1	LAD1	0.811708	2.76E-07	59.567	AT(0.001)AS(0.001)EQPLAQEPPAS(0.132)GGS(0.812)PAT(0.027)T(0.027)K	3	-0.25349	2			1.064	0.936			0.932	0.913	0.827	1.046	1.079	1.203			1.287	0.895			0.696
O00515	355	S	Ladinin-1	LAD1	0.894571	3.35E-42	177.44	IPSKEEEADMS(0.895)S(0.104)PT(0.002)QR	2	-0.72826	14		1.028	0.669	0.78	1.524		0.932	0.913	0.827	1.046	1.079	1.203		1.126	0.809	0.746	1.412		1.115	7.91E-01
O00559	36	S	Receptor-binding cancer antigen expressed on SiSo cells	EBAG9	0.999972	3.18E-22	126.29	KLS(1)GDQITLPTTVDYSSVPK	2	-0.062283	26	1.255	1.042	0.978	0.934	0.803	0.988
O00566	163	S	U3 small nucleolar ribonucleoprotein protein MPP10	MPHOSPH10	0.999254	6.06E-09	97.152	S(0.999)PVFS(0.001)DEDS(1)DLDFDISK	2	-0.68375	32	1.385	0.905	0.839	1.117	0.902	0.852	1.139	1.097	1.088	0.856	0.892	0.928	1.216	0.825	0.771	1.305	1.011	0.918	1.150	4.83E-01
O00566	171	S	U3 small nucleolar ribonucleoprotein protein MPP10	MPHOSPH10	0.999979	6.06E-09	97.152	KS(0.993)PVFS(0.007)DEDS(1)DLDFDISK	3	0.21895	38	1.603	1.04	1.044	1.013	0.427	0.873	1.139	1.097	1.088	0.856	0.892	0.928	1.407	0.948	0.960	1.183	0.479	0.941	0.785	4.06E-01
O00566	167	S	U3 small nucleolar ribonucleoprotein protein MPP10	MPHOSPH10	0.837092	7.05E-07	84.946	S(0.157)PVFS(0.837)DEDS(0.006)DLDFDISK	2	-0.56943	6	1.03		1.019		0.95		1.139	1.097	1.088	0.856	0.892	0.928	0.904		0.937		1.065		1.157
O00567	519	S	Nucleolar protein 56	NOP56	0.999999	3.11E-14	120.23	EELMS(1)S(1)DLEETAGSTSIPK	3	0.23145	47	1.01	1.102	1.059	0.962	0.956	0.912	1.096	1.032	1.067	0.950	0.913	0.943	0.922	1.068	0.993	1.013	1.047	0.967	1.015	7.71E-01
O00567	563	S	Nucleolar protein 56	NOP56	1	4.39E-07	81.808	KFS(1)KEEPVS(1)S(1)GPEEAVGK	3	-2.6173	8	0.966	0.626	0.958	1.412	0.637	1.401	1.096	1.032	1.067	0.950	0.913	0.943	0.881	0.607	0.898	1.486	0.698	1.486	1.538	2.00E-01
O00567	314	S	Nucleolar protein 56	NOP56	0.996355	5.74E-12	125.41	LIAHAGS(0.996)LT(0.004)NLAK	2	-0.12378	7	1.802	1.319	1.122	0.548	0.784	0.424	1.096	1.032	1.067	0.950	0.913	0.943	1.644	1.278	1.052	0.577	0.859	0.450	0.474	2.98E-02
O00567	570	S	Nucleolar protein 56	NOP56	1	4.64E-15	126.63	KFS(1)KEEPVS(1)S(1)GPEEAVGK	3	-2.6173	38	1.307	0.92	1.092	0.962	0.824	0.894	1.096	1.032	1.067	0.950	0.913	0.943	1.193	0.891	1.023	1.013	0.903	0.948	0.921	4.30E-01
O00567	569	S	Nucleolar protein 56	NOP56	1	6.82E-07	99.413	KFS(1)KEEPVS(1)S(1)GPEEAVGK	3	-2.6173	27	1.367	0.951	1.039	1.001	0.885	0.756	1.096	1.032	1.067	0.950	0.913	0.943	1.247	0.922	0.974	1.054	0.969	0.802	0.899	4.45E-01
O00567	520	S	Nucleolar protein 56	NOP56	0.999999	1.39E-14	123.14	EELMS(1)S(1)DLEETAGSTSIPK	3	0.23145	38	1.472	1.217	1.375	1.031	0.117	0.788	1.096	1.032	1.067	0.950	0.913	0.943	1.343	1.179	1.289	1.085	0.128	0.836	0.538	1.13E-01
O00712	328	S	Nuclear factor 1 B-type	NFIB	0.976703	2.00E-06	76.889	KPEKPLFS(0.005)S(0.018)AS(0.977)PQDSSPR	3	-0.79665	4		0.357	1.01	1.557	1.361	0.715	1.286	0.939	1.040	0.810	0.896	1.029		0.380	0.971	1.922	1.519	0.695	2.040	2.66E-01
O14493	194	S	Claudin-4	CLDN4	1	1.44E-03	101.3	TDKPYS(1)AK	2	0.087693	4	0.753	1.496	1.327	0.988	1.079	0.357	0.895	0.991	0.892	1.050	1.123	1.049	0.841	1.510	1.488	0.941	0.961	0.340	0.584	1.50E-01
O14497	1755	S	AT-rich interactive domain-containing protein 1A	ARID1A	0.816128	6.09E-17	111.11	VS(0.184)S(0.816)PAPMEGGEEEEELLGPK	2	-0.055961	17	1.46	1.042	0.916	1.133	0.737	0.712	1.092	1.044	1.108	0.934	0.918	0.904	1.337	0.998	0.827	1.213	0.803	0.788	0.887	5.91E-01
O14497	1751	S	AT-rich interactive domain-containing protein 1A	ARID1A	0.999999	2.82E-02	68.171	TLLDPGRFS(1)K	2	-0.29785	1	1.52	0.751	1.046	0.939	0.886	0.859	1.092	1.044	1.108	0.934	0.918	0.904	1.392	0.719	0.944	1.005	0.965	0.950	0.956	8.32E-01
O14497	1944	S	AT-rich interactive domain-containing protein 1A	ARID1A	0.999999	3.79E-07	100.11	FPFGIS(1)PAQSHR	3	0.23775	6	1.399	0.851	1.097	1.039	0.741	0.873	1.092	1.044	1.108	0.934	0.918	0.904	1.281	0.815	0.990	1.112	0.807	0.966	0.935	7.00E-01
O14497	702	S	AT-rich interactive domain-containing protein 1A	ARID1A	0.980233	6.31E-07	84.68	GPS(0.994)PS(0.018)PVGS(0.98)PAS(0.006)VAQS(0.002)R	2	-0.60138	2	1.006	0.967	0.963	1.254		0.811	1.092	1.044	1.108	0.934	0.918	0.904	0.921	0.926	0.869	1.343		0.897	1.237	2.91E-01
O14497	363	S	AT-rich interactive domain-containing protein 1A	ARID1A	0.999932	4.30E-23	133.74	SHHAPMS(1)PGSSGGGGQPLAR	3	-0.21869	28	0.963	1.724	0.675	0.705	0.972	0.961	1.092	1.044	1.108	0.934	0.918	0.904	0.882	1.651	0.609	0.755	1.059	1.063	0.915	8.01E-01
O14497	696	S	AT-rich interactive domain-containing protein 1A	ARID1A	0.999963	3.66E-58	191.07	GPS(1)PSPVGSPASVAQSR	2	0.35664	34	1.121	1.241	1.033	0.857	0.888	0.861	1.092	1.044	1.108	0.934	0.918	0.904	1.027	1.189	0.932	0.918	0.967	0.952	0.901	2.47E-01
O14523	619	S	C2 domain-containing protein 2-like	C2CD2L	0.977426	6.99E-20	108.57	S(0.001)DIS(0.005)ERPS(0.015)VDDIES(0.977)ET(0.002)GSTGALETR	3	-0.0048216	3	1.203				0.797		0.888	1.061	0.596	1.223	1.231	1.000	1.355				0.647		0.478
O14545	327	S	TRAF-type zinc finger domain-containing protein 1	TRAFD1	0.848401	9.54E-29	168.57	ALPSLNTGS(0.004)S(0.148)S(0.848)PR	2	-0.52313	2			0.789	1.211
O14545	326	S	TRAF-type zinc finger domain-containing protein 1	TRAFD1	0.787148	1.56E-32	170.78	ALPSLNTGS(0.053)S(0.787)S(0.159)PR	3	-0.9338	4	1.037				0.886	1.077
O14545	415	S	TRAF-type zinc finger domain-containing protein 1	TRAFD1	0.936243	2.94E-10	117.2	LDSQPQET(0.064)S(0.936)PELPR	2	0.20407	17	0.817		0.78	1.162	0.844	1.398
O14578	480	S	Citron Rho-interacting kinase	CIT	1	2.84E-16	145.54	RVS(1)EVEAVLSQK	3	-0.36032	18	1.169	1.171	1.01	0.811	1.105	0.734	1.128	1.092	1.052	0.858	0.960	0.910	1.036	1.072	0.960	0.945	1.151	0.807	0.946	6.28E-01
O14579	99	S	Coatomer subunit epsilon	COPE	1	1.45E-13	163.64	RDS(1)IVAELDR	2	-1.9346	21	1.551	0.701	0.806	1.087	0.775	1.08	0.921	0.822	0.874	1.191	1.041	1.151	1.684	0.853	0.922	0.913	0.744	0.938	0.750	3.51E-01
O14617	829	S	AP-3 complex subunit delta-1	AP3D1	1	1.61E-08	114.63	S(1)PEKDVPMVEK	2	0.79748	9	1.098	1.216	1.093	0.885	1.094	0.615	0.988	0.976	0.982	1.028	0.981	1.045	1.111	1.246	1.113	0.861	1.115	0.589	0.739	1.29E-01
O14639	367	S	Actin-binding LIM protein 1	ABLIM1	0.99786	6.44E-06	88.283	PGSS(0.001)IPGS(0.998)PGHT(0.001)IYAK	3	0.52862	4	0.655		0.731	1.303	1.311		0.827	0.879	0.867	1.164	1.020	1.244	0.792		0.843	1.119	1.285		1.471	4.73E-02
O14639	431	S	Actin-binding LIM protein 1	ABLIM1	0.999663	9.36E-32	163.41	TLS(1)PTPSAEGYQDVR	2	0.70587	24	0.886	1.053	0.906	1.075	1.112	0.968	0.827	0.879	0.867	1.164	1.020	1.244	1.071	1.198	1.045	0.924	1.090	0.778	0.842	1.62E-01
O14639	586	S	Actin-binding LIM protein 1	ABLIM1	0.841209	1.25E-16	139.88	S(0.841)S(0.159)GREEDDEELLR	2	1.0808	11	1.176	0.83	0.952	1.024	0.987	1.031	0.827	0.879	0.867	1.164	1.020	1.244	1.422	0.944	1.098	0.880	0.968	0.829	0.772	1.47E-01
O14639	351	T	Actin-binding LIM protein 1	ABLIM1	0.837829	2.72E-03	88.495	T(0.838)S(0.139)S(0.023)ESIYSR	2	0.28129	3	0.962				1.038		0.827	0.879	0.867	1.164	1.020	1.244	1.163				1.018		0.875
O14639	655	S	Actin-binding LIM protein 1	ABLIM1	0.999961	1.67E-05	118.6	TAS(1)LPGYGR	2	-0.25943	9	0.974	0.735	0.852	1.226	1.067	1.145	0.827	0.879	0.867	1.164	1.020	1.244	1.178	0.836	0.983	1.053	1.046	0.920	1.008	9.46E-01
O14639	706	S	Actin-binding LIM protein 1	ABLIM1	1	1.23E-03	66.56	GVS(1)MPNMLEPK	2	-0.54525	3	0.924	0.757	0.669	1.175	1.448	1.027	0.827	0.879	0.867	1.164	1.020	1.244	1.117	0.861	0.772	1.009	1.420	0.826	1.183	4.56E-01
O14646	1353	S	Chromodomain-helicase-DNA-binding protein 1	CHD1	0.958767	3.25E-05	78.708	VKEEIKS(0.959)DS(0.728)S(0.31)PLPS(0.003)EK	2	-0.56218	3	0.73	1.013	1.419		0.838		0.984		1.084		0.845	1.087	0.742		1.309		0.992		0.967
O14646	1673	S	Chromodomain-helicase-DNA-binding protein 1	CHD1	0.812623	2.20E-05	88.768	AS(0.003)S(0.093)S(0.813)GPRS(0.092)PLDQR	3	-0.20124	2	0.98	1.197	0.874		1.214	0.735	0.984		1.084		0.845	1.087	0.996		0.806		1.437	0.676	1.172	7.30E-01
O14646	1689	S	Chromodomain-helicase-DNA-binding protein 1	CHD1	1	2.94E-09	129.04	S(1)PFEHSVEHK	2	1.3515	5	0.899	0.089				2.012	0.984		1.084		0.845	1.087	0.914					1.851	2.026
O14681	330	S	Etoposide-induced protein 2.4 homolog	EI24	1	9.55E-14	157.42	FPS(1)PHPS(1)PAK	2	-0.47934	35	1.461	1.56	0.439	1.082	0.969	0.49	0.948	1.010	1.179	0.931	0.921	1.011	1.541	1.545	0.372	1.162	1.052	0.485	0.780	5.98E-01
O14681	326	S	Etoposide-induced protein 2.4 homolog	EI24	1	9.07E-10	136.93	FPS(1)PHPS(1)PAK	2	-0.47934	32	1.224	0.884	1.024	0.769	1.061	1.039	0.948	1.010	1.179	0.931	0.921	1.011	1.291	0.875	0.869	0.826	1.152	1.028	0.990	9.57E-01
O14686	468	S	Histone-lysine N-methyltransferase 2D	KMT2D	0.999982	1.71E-04	47.803	LS(1)PPPEELPAS(0.999)PLPEALHLS(0.001)R	3	-1.0923	2		1.181	1.335	0.841	0.643				1.000						1.335
O14686	1195	T	Histone-lysine N-methyltransferase 2D	KMT2D	0.994918	2.41E-06	104.55	APVAPT(0.995)PPT(0.005)LIK	2	-0.23977	14	0.817	0.895	1.02	1.206	0.895	1.166			1.000						1.020
O14686	4822	S	Histone-lysine N-methyltransferase 2D	KMT2D	0.994921	5.35E-04	65.833	IPNS(0.001)Y(0.004)EVLFPES(0.995)PAR	2	1.6725	2			1.092		1.283	0.626			1.000						1.092
O14686	1671	S	Histone-lysine N-methyltransferase 2D	KMT2D	1	3.03E-30	140.45	LEGPVS(1)PDVEPGKEETEESK	2	0.38271	17	1.176	0.768	0.922	1.166	0.752	1.216			1.000						0.922
O14686	3130	S	Histone-lysine N-methyltransferase 2D	KMT2D	0.999945	1.31E-05	93.495	HPS(1)PCQFTIATPK	2	0.084781	3		1.164		0.784	1.051				1.000
O14686	2274	S	Histone-lysine N-methyltransferase 2D	KMT2D	0.998208	4.01E-04	64.705	AS(0.002)EPLLS(0.998)PPPFGESR	2	1.4366	7			0.885		1.079	1.036			1.000						0.885
O14686	2229	T	Histone-lysine N-methyltransferase 2D	KMT2D	0.98029	1.90E-13	120.32	PGAGQPGEFHT(0.019)T(0.98)PPGT(0.001)PR	3	0.97651	21	0.859	1.195	0.823	0.976	1.276	0.871			1.000						0.823
O14686	4682	T	Histone-lysine N-methyltransferase 2D	KMT2D	0.999962	1.08E-10	89.721	SLDLLAALPT(1)PPHNQTEDVR	3	0.0050277	11	1.795	1.039	1.027	0.772	0.671	0.695			1.000						1.027
O14686	654	S	Histone-lysine N-methyltransferase 2D	KMT2D	1	4.34E-04	88.338	LS(1)PLPVVSR	2	0.13475	7			0.933	0.956	1.13	0.981			1.000						0.933
O14686	4849	S	Histone-lysine N-methyltransferase 2D	KMT2D	0.995647	3.03E-03	63.966	S(0.996)PDT(0.004)GPDWLK	2	0.3752	1			0.985	1.082	0.933				1.000						0.985
O14686	609	S	Histone-lysine N-methyltransferase 2D	KMT2D	0.789727	1.45E-05	41.936	LFPPFEES(0.202)PLS(0.79)PPPEES(0.038)PLS(0.967)PPPEAS(0.003)R	3	-0.40407	1		1.092	1.34	0.887	0.681				1.000						1.340
O14686	4738	S	Histone-lysine N-methyltransferase 2D	KMT2D	1	4.32E-07	109.96	ALS(1)PVIPLIPR	2	-1.9439	5	0.985	0.882	1.184	0.919	0.944	1.085			1.000						1.184
O14686	618	S	Histone-lysine N-methyltransferase 2D	KMT2D	0.967402	1.45E-05	41.936	LFPPFEES(0.202)PLS(0.79)PPPEES(0.038)PLS(0.967)PPPEAS(0.003)R	3	-0.40407	1		1.092	1.34	0.887	0.681				1.000						1.340
O14686	4359	S	Histone-lysine N-methyltransferase 2D	KMT2D	1	1.12E-15	127.89	VS(1)PAAAQLADTLFSK	2	0.46968	12		0.957	1.313	1.021	0.743	0.966			1.000						1.313
O14686	1180	S	Histone-lysine N-methyltransferase 2D	KMT2D	0.999988	3.56E-32	164.2	QTAGQGS(1)PCEEQEEPR	2	-1.4724	5		1.543	0.804	0.697	0.91	1.047			1.000						0.804
O14686	2240	T	Histone-lysine N-methyltransferase 2D	KMT2D	0.80685	4.65E-03	56.514	HQPS(0.193)T(0.807)PDPFLKPR	3	0.53732	3			1.128		0.934	0.938			1.000						1.128
O14686	477	S	Histone-lysine N-methyltransferase 2D	KMT2D	0.999398	1.71E-04	47.803	LS(1)PPPEELPAS(0.999)PLPEALHLS(0.001)R	3	-1.0923	2		1.181	1.335	0.841	0.643				1.000						1.335
O14745	269	S	Na(+)/H(+) exchange regulatory cofactor NHE-RF1	SLC9A3R1	1	3.88E-04	67.227	ENS(1)REALAEAALESPR	3	0.71122	4		1.117		1.146	0.969	0.768	0.938	0.859	0.952	1.043	1.120	1.089		1.300		1.099	0.865	0.705	0.684
O14745	280	S	Na(+)/H(+) exchange regulatory cofactor NHE-RF1	SLC9A3R1	1	5.09E-58	184.15	EALAEAALES(1)PRPALVR	4	-0.14607	15	0.833	0.87	0.815	1.168	1.061	1.253	0.938	0.859	0.952	1.043	1.120	1.089	0.888	1.013	0.856	1.120	0.947	1.151	1.167	1.25E-01
O14745	290	S	Na(+)/H(+) exchange regulatory cofactor NHE-RF1	SLC9A3R1	0.85821	1.62E-71	211.13	S(0.011)AS(0.858)S(0.131)DTSEELNSQDSPPK	2	-0.50602	15	1.025		0.862		1.152	0.961	0.938	0.859	0.952	1.043	1.120	1.089	1.093		0.905		1.029	0.882	0.956	7.49E-01
O14828	76	S	Secretory carrier-associated membrane protein 3	SCAMP3	0.999998	8.07E-07	163.59	KLS(1)PTEPK	2	0.05362	14	0.584	0.628	0.746	1.33	1.543	1.168	1.085	1.148	1.115	0.841	0.896	0.915	0.538	0.547	0.669	1.581	1.722	1.277	2.611	2.42E-03
O14908	232	S	PDZ domain-containing protein GIPC1	GIPC1	0.974574	3.09E-03	41.798	SAGGRPGS(0.975)GPQLGT(0.025)GR	3	-0.62818	1	0.777	1.231	0.806			1.186	0.973	0.992	0.945	1.037	1.049	1.005	0.799	1.241	0.853			1.180	1.224
O14929	361	S	Histone acetyltransferase type B catalytic subunit	HAT1	1	9.36E-03	108.81	LIS(1)PYKK	2	0.43984	3	1.015	1.027		0.897		1.061	0.922	1.042	0.975	0.917	1.071	1.074	1.101	0.986		0.978		0.988	0.942	4.07E-01
O14936	582	S	Peripheral plasma membrane protein CASK	CASK	0.996704	8.53E-82	231.37	TQSS(0.001)S(0.001)CERDS(0.997)PS(0.002)TSR	2	0.018228	12	1.046	0.854	1.407	0.732	1.159	0.803	1.067	1.105	1.119	0.879	0.904	0.925	0.980	0.773	1.257	0.833	1.282	0.868	0.991	9.66E-01
O14974	409	S	Protein phosphatase 1 regulatory subunit 12A	PPP1R12A	0.858993	1.10E-12	59.31	TKPLASVTNANTSSTQAAPVAVTTPTVS(0.001)S(0.001)GQAT(0.017)PT(0.122)S(0.859)PIKK	4	-0.080095	3	1.073		1.21		0.717		1.048	1.090	1.102	0.937	0.947	0.877	1.024		1.098		0.757		0.714
O14974	299	S	Protein phosphatase 1 regulatory subunit 12A	PPP1R12A	0.98724	1.94E-10	86.918	DKKS(0.987)PLIES(0.006)T(0.006)ANMDNNQSQK	3	0.26073	5			0.496	0.927	1.577		1.048	1.090	1.102	0.937	0.947	0.877			0.450	0.989	1.665		2.949
O15014	578	S	Zinc finger protein 609	ZNF609	0.999894	4.76E-20	159.02	LVEPHS(1)PS(1)PSSK	2	0.29901	14	1.183	0.735	0.788	1.118	0.893	1.282	0.948	1.096	1.051	0.923	1.122	0.861	1.248	0.671	0.750	1.211	0.796	1.489	1.310	3.65E-01
O15014	746	T	Zinc finger protein 609	ZNF609	0.997702	1.66E-02	61.42	ELES(0.002)PLT(0.998)PGK	2	2.089	5	1.202	1.118	0.684		1.148	0.847	0.948	1.096	1.051	0.923	1.122	0.861	1.268	1.020	0.651		1.023	0.984	1.024	9.25E-01
O15014	1055	S	Zinc finger protein 609	ZNF609	0.996796	4.16E-04	88.803	APS(0.997)LT(0.003)DLVK	2	0.73377	13	1.577	1.005	0.893	0.726		0.799	0.948	1.096	1.051	0.923	1.122	0.861	1.664	0.917	0.850	0.787		0.928	0.750	4.63E-01
O15014	758	S	Zinc finger protein 609	ZNF609	1	1.90E-09	123.92	AEEGKS(1)PFR	2	0.28224	10		0.898		1.133	1.229	0.741	0.948	1.096	1.051	0.923	1.122	0.861		0.819		1.228	1.095	0.861	1.295
O15014	491	S	Zinc finger protein 609	ZNF609	1	9.77E-10	107.69	NCPS(1)PVLIDCPHPNCNK	3	0.26096	15	1.046	0.804	0.909	1.183	0.855	1.203	0.948	1.096	1.051	0.923	1.122	0.861	1.103	0.734	0.865	1.282	0.762	1.397	1.274	3.32E-01
O15014	358	S	Zinc finger protein 609	ZNF609	0.975668	2.05E-05	90.707	FCDS(0.976)PT(0.02)S(0.004)DLEMR	2	-1.2811	2	1.433	1.014	0.946	0.888	0.775	0.944	0.948	1.096	1.051	0.923	1.122	0.861	1.512	0.925	0.900	0.962	0.691	1.096	0.824	4.47E-01
O15014	467	S	Zinc finger protein 609	ZNF609	0.990129	4.23E-07	103.01	T(0.007)NS(0.99)MGS(0.003)ATGPLPGTK	2	-0.34072	8	1.152	0.805	0.758	1.184	1.086	1.014	0.948	1.096	1.051	0.923	1.122	0.861	1.215	0.734	0.721	1.283	0.968	1.178	1.284	2.48E-01
O15014	576	S	Zinc finger protein 609	ZNF609	1	2.29E-25	180.11	LVEPHS(1)PS(1)PSSK	2	0.29901	20	1.185	0.449	0.807	1.235	1.023	1.301	0.948	1.096	1.051	0.923	1.122	0.861	1.250	0.410	0.768	1.338	0.912	1.511	1.549	2.15E-01
O15027	1876	T	Protein transport protein Sec16A	SEC16A	0.896167	2.31E-02	73.499	FANLT(0.896)PS(0.104)R	2	0.25767	2	0.767			1.105	0.984	1.144	0.927	0.858	1.031	1.036	1.067	1.079	0.827			1.067	0.922	1.060	1.228
O15027	1149	S	Protein transport protein Sec16A	SEC16A	0.965693	5.17E-15	84.946	FT(0.034)GS(0.966)FDDDPDPHRDPYGEEVDRR	4	-0.22771	12	0.752	1.022	0.653	1.405	1.379	0.789	0.927	0.858	1.031	1.036	1.067	1.079	0.811	1.191	0.633	1.356	1.292	0.731	1.282	3.91E-01
O15027	1191	S	Protein transport protein Sec16A	SEC16A	0.906921	1.28E-10	119.39	S(0.083)S(0.907)LS(0.009)S(0.001)HSHQSQIYR	3	-0.80979	1	1.348				0.652		0.927	0.858	1.031	1.036	1.067	1.079	1.454				0.611		0.420
O15027	1905	S	Protein transport protein Sec16A	SEC16A	0.852955	5.72E-06	65.064	ADSGPTQPPLS(0.14)LS(0.853)PAPET(0.007)K	2	-0.62871	1	1.514	0.963	1.056	0.838	0.81	0.82	0.927	0.858	1.031	1.036	1.067	1.079	1.633	1.122	1.024	0.809	0.759	0.760	0.616	6.30E-02
O15027	136	S	Protein transport protein Sec16A	SEC16A	1	3.69E-04	72.88	IVNHWAS(1)PELR	3	0.15648	4	1.176		0.872		0.826	1.126	0.927	0.858	1.031	1.036	1.067	1.079	1.269		0.846		0.774	1.044	0.860	6.14E-01
O15027	891	S	Protein transport protein Sec16A	SEC16A	1	5.06E-08	84.03	AQQELVPPQQQAS(1)PPQLPK	3	1.4417	19	0.682	0.83	0.89	1.129	1.039	1.43	0.927	0.858	1.031	1.036	1.067	1.079	0.736	0.967	0.863	1.090	0.974	1.325	1.321	9.01E-02
O15027	1178	S	Protein transport protein Sec16A	SEC16A	0.999993	1.38E-05	94.287	S(1)LHS(0.997)AHS(0.003)LASR	2	0.57424	6	0.775		0.827	0.895	1.999	0.503	0.927	0.858	1.031	1.036	1.067	1.079	0.836		0.802	0.864	1.873	0.466	1.304	6.77E-01
O15027	1181	S	Protein transport protein Sec16A	SEC16A	0.999858	1.52E-08	115.69	SLHS(1)AHSLASR	3	-0.57118	10	0.592		0.632	0.683	1.526	1.567	0.927	0.858	1.031	1.036	1.067	1.079	0.639		0.613	0.659	1.430	1.452	1.886	1.98E-01
O15027	1786	S	Protein transport protein Sec16A	SEC16A	0.999995	2.19E-08	93.404	LLPSAPQTLPDGPLAS(1)PAR	3	0.12527	14	0.582	0.618		1.396	1.239	1.165	0.927	0.858	1.031	1.036	1.067	1.079	0.628	0.720		1.347	1.161	1.080	1.775	1.69E-02
O15042	811	S	U2 snRNP-associated SURP motif-containing protein	U2SURP	0.999997	7.02E-06	78.69	S(1)EEHHLYSNPIK	3	1.0659	12	0.84	1.092	1	0.902	0.742	1.424	0.977	1.040	1.023	0.947	1.004	1.008	0.860	1.050	0.978	0.952	0.739	1.413	1.075	7.44E-01
O15042	485	S	U2 snRNP-associated SURP motif-containing protein	U2SURP	0.967351	1.60E-31	186.42	LYSILQGDS(0.967)PT(0.033)K	2	0.16179	10	1.361	0.901	0.905	0.96	0.907	0.966	0.977	1.040	1.023	0.947	1.004	1.008	1.393	0.866	0.885	1.014	0.903	0.958	0.915	6.37E-01
O15047	1152	S	Histone-lysine N-methyltransferase SETD1A	SETD1A	0.763726	3.64E-05	77.031	PDERPS(0.764)S(0.236)PIPLLPPPK	3	-0.21518	12		0.779	0.849	1.205	1.038	1.129						1.000						1.129
O15047	1103	S	Histone-lysine N-methyltransferase SETD1A	SETD1A	0.999987	4.88E-13	115.42	VAGS(1)PVTPLPEQEASPAR	2	0.49965	10	0.851	1.218	1.088	0.897	1.138	0.808						1.000						0.808
O15047	1153	S	Histone-lysine N-methyltransferase SETD1A	SETD1A	0.820222	3.64E-05	77.031	PDERPS(0.18)S(0.82)PIPLLPPPK	3	-0.023884	12	1.141	0.777	0.846	1.201	1.035							1.000
O15055	977	S	Period circadian protein homolog 2	PER2	0.999989	1.49E-02	52.49	AS(1)PPLFQSR	2	-0.16779	2	1.181		0.791			1.028
O15085	251	S	Rho guanine nucleotide exchange factor 11	ARHGEF11	0.857913	1.28E-03	42.468	NS(0.003)VLS(0.095)DPGLDS(0.858)PRT(0.522)S(0.522)PVIMAR	3	2.6203	2		0.703				1.297		1.000						0.703
O15085	245	S	Rho guanine nucleotide exchange factor 11	ARHGEF11	0.921647	6.50E-04	47.73	NS(0.002)VLS(0.922)DPGLDS(0.225)PRT(0.426)S(0.426)PVIMAR	3	1.624	1	1.018		0.879		1.102			1.000
O15085	1413	S	Rho guanine nucleotide exchange factor 11	ARHGEF11	0.999846	1.35E-03	85.764	S(1)PPSLALR	2	0.35554	6	0.916	0.931	0.96	0.968	1.141	1.083		1.000						0.931
O15085	668	T	Rho guanine nucleotide exchange factor 11	ARHGEF11	0.976579	1.44E-02	67.415	S(1)LENPT(0.977)PPFT(0.023)PK	2	1.2914	3	1.113	1.544	1.767	0.443	0.75	0.384		1.000						1.544
O15085	663	S	Rho guanine nucleotide exchange factor 11	ARHGEF11	0.999999	1.44E-02	67.415	S(1)LENPT(0.962)PPFT(0.038)PK	2	1.1681	2	1.565	1.047	1.172	0.623	1.054	0.539		1.000						1.047
O15085	150	S	Rho guanine nucleotide exchange factor 11	ARHGEF11	0.952824	9.32E-06	59.502	IT(0.01)S(0.037)VIPS(0.953)PPPPPPLPPPQR	3	-0.42253	2		1.297		0.703				1.000						1.297
O15164	811	S	Transcription intermediary factor 1-alpha	TRIM24	1	1.34E-18	127.5	S(1)PLHVGETR	2	-0.36026	19	0.941	0.96	0.818	1.138	1.196	0.947	0.788	0.774	1.067	1.130	1.095	1.145	1.194	1.240	0.767	1.007	1.092	0.827	0.914	6.18E-01
O15164	1028	S	Transcription intermediary factor 1-alpha	TRIM24	0.995416	1.04E-08	72.316	NESEDNKFS(0.005)DDS(0.995)DDDFVQPR	3	-0.099675	9	0.842	1.394	1.003	1.144		0.617	0.788	0.774	1.067	1.130	1.095	1.145	1.069	1.801	0.940	1.012		0.539	0.611	2.93E-01
O15164	1042	S	Transcription intermediary factor 1-alpha	TRIM24	1	5.60E-05	154.05	LKS(1)IEER	2	0.12598	7	0.869	0.702	1.1	1.037	1.372	0.921	0.788	0.774	1.067	1.130	1.095	1.145	1.103	0.907	1.031	0.918	1.253	0.804	0.978	8.88E-01
O15173	104	S	Membrane-associated progesterone receptor component 2	PGRMC2	1	2.61E-03	77.662	DFS(1)LEQLR	2	-0.56337	6	0.819	0.924	0.595	0.972	1.32	1.369	1.002	1.031	1.130	0.935	0.941	0.961	0.817	0.896	0.527	1.040	1.403	1.425	1.726	3.20E-02
O15173	90	S	Membrane-associated progesterone receptor component 2	PGRMC2	0.992326	3.16E-14	122.34	GLGAGAGAGEES(0.992)PAT(0.006)S(0.002)LPR	3	-2.8796	14	1.25	1.171	0.886	0.79	1.254	0.649	1.002	1.031	1.130	0.935	0.941	0.961	1.248	1.136	0.784	0.845	1.333	0.675	0.901	6.87E-01
O15173	211	T	Membrane-associated progesterone receptor component 2	PGRMC2	0.999995	9.72E-53	178.69	LLKPGEEPSEYT(1)DEEDTKDHNK	4	0.41366	102	1.039	1.076	1.075	0.703	1.031	1.076	1.002	1.031	1.130	0.935	0.941	0.961	1.037	1.044	0.951	0.752	1.096	1.120	0.979	8.69E-01
O15194	33	S	CTD small phosphatase-like protein	CTDSPL	1	7.08E-06	109.95	ASQCNVS(1)LKK	2	-0.29726	9	0.911	0.821	1.183	1.156	1.277	0.653	1.010	1.040	1.048	0.874	1.034	0.994	0.902	0.789	1.129	1.323	1.235	0.657	1.140	6.00E-01
O15231	447	T	Zinc finger protein 185	ZNF185	0.950279	8.46E-11	87.457	GGQGDPAVPAQQPADPS(0.05)T(0.95)PER	2	0.91931	13	0.971	1.481	0.905	0.684	1.208	0.752	0.916	0.851	0.892	1.091	1.164	1.085	1.060	1.740	1.015	0.627	1.038	0.693	0.618	1.43E-01
O15231	453	S	Zinc finger protein 185	ZNF185	0.99916	5.45E-20	159	QS(0.001)S(0.999)PSGSEQLVR	2	-0.31853	10	0.75	0.92	0.938	0.881	1.507	1.003	0.916	0.851	0.892	1.091	1.164	1.085	0.819	1.081	1.052	0.808	1.295	0.924	1.025	8.89E-01
O15231	465	S	Zinc finger protein 185	ZNF185	0.995817	1.38E-43	183.45	RES(0.996)CGS(0.004)SVLTDFEGK	2	-2.0295	22	0.885	0.859	0.831	1.266	1.157	1.002	0.916	0.851	0.892	1.091	1.164	1.085	0.966	1.009	0.932	1.160	0.994	0.924	1.059	4.83E-01
O15234	363	S	Protein CASC3	CASC3	0.969839	9.59E-08	56.366	DPS(0.97)PEADAPVLGS(0.515)PEKEEAAS(0.515)EPPAAAPDAAPPPPDRPIEK	4	0.79727	2			0.114		1.383	1.503			1.128			0.872			0.101			1.724	17.055
O15234	265	S	Protein CASC3	CASC3	0.995819	3.28E-03	82.75	Y(0.004)GS(0.996)PPQR	2	0.46624	5	0.612	0.981	0.742	0.829	1.354	1.482			1.128			0.872			0.658			1.700	2.584
O15234	28	S	Protein CASC3	CASC3	0.962073	4.68E-18	100.24	ASQDTEDEESGAS(0.001)GS(0.01)DS(0.027)GGS(0.962)PLR	2	0.063613	7	0.856	1.205	0.974	1.05	1.246	0.669			1.128			0.872			0.863			0.767	0.889
O15234	148	S	Protein CASC3	CASC3	1	8.20E-23	145.82	QS(1)GDGQESTEPVENK	2	1.4039	14	0.948	1.033	1.015	1.208	1	0.795			1.128			0.872			0.900			0.912	1.013
O15258	6	S	Protein RER1	RER1	0.977084	6.06E-03	50.077	S(0.009)EGDS(0.977)VGES(0.014)VHGK	2	-1.6552	2	1.253	0.694	1.098	0.986	0.969		0.943	1.142	1.119	0.911	0.875	1.011	1.329	0.608	0.981	1.082	1.107		1.126	6.80E-01
O15258	95	S	Protein RER1	RER1	0.996357	5.94E-06	70.345	VDPSLMEDS(0.996)DDGPS(0.003)LPTK	2	1.774	10	1.23	0.817	0.981	1.245	0.794	0.932	0.943	1.142	1.119	0.911	0.875	1.011	1.304	0.715	0.877	1.367	0.907	0.922	1.103	6.89E-01
O15258	2	S	Protein RER1	RER1	0.999676	1.45E-08	92.792	S(1)EGDSVGESVHGKPSVVYR	3	0.80801	6		1.105	0.834	1.161	0.739	1.16	0.943	1.142	1.119	0.911	0.875	1.011		0.968	0.745	1.274	0.845	1.147	1.271	2.97E-01
O15265	492	S	Ataxin-7	ATXN7	0.99997	7.57E-07	88.427	LS(1)S(1)EEGEGDDKEESVEK	2	1.084	5	1.044	0.696		1.185	1.074
O15265	491	S	Ataxin-7	ATXN7	0.99997	7.57E-07	88.427	LS(1)S(1)EEGEGDDKEESVEK	2	1.084	4	0.948			1.076	0.976
O15320	635	S	cTAGE family member 5	CTAGE5	1	2.37E-03	78.61	LS(1)GPAELR	2	-0.28718	9	1.41	1.036	1.237	0.719	0.898	0.7	1.012	0.996	1.147	0.951	0.965	0.928	1.393	1.040	1.078	0.756	0.931	0.754	0.695	4.74E-02
O15320	596	S	cTAGE family member 5	CTAGE5	0.999949	1.97E-18	136.46	APSDT(0.004)GS(0.996)LS(1)PPWDQDR	2	0.10805	32	1.11	0.944	0.986	1.048	0.987	0.925	1.012	0.996	1.147	0.951	0.965	0.928	1.097	0.948	0.860	1.102	1.023	0.997	1.075	3.95E-01
O15320	536	S	cTAGE family member 5	CTAGE5	0.999998	2.40E-22	150.76	AFLS(1)PPTLLEGPLR	2	0.0098704	18	1.057	1.045	0.993	0.88	1.095	0.931	1.012	0.996	1.147	0.951	0.965	0.928	1.044	1.049	0.866	0.925	1.135	1.003	1.035	7.07E-01
O15320	594	S	cTAGE family member 5	CTAGE5	0.996253	1.27E-16	136.46	APSDT(0.004)GS(0.996)LS(1)PPWDQDR	2	0.10805	21	0.898	1.051	1.199	1.178	0.825	0.849	1.012	0.996	1.147	0.951	0.965	0.928	0.887	1.055	1.045	1.239	0.855	0.915	1.007	9.61E-01
O15344	96	S	E3 ubiquitin-protein ligase Midline-1	MID1	0.996763	1.78E-32	169.02	ASVSGPNS(0.997)PS(0.003)ETR	2	0.41357	6	0.919	0.987	0.684	1.143		1.268	1.054	1.037	0.965	0.944	0.889	1.112	0.872	0.952	0.709	1.211		1.140	1.393	4.09E-02
O15355	122	T	Protein phosphatase 1G	PPM1G	1	9.59E-04	47.564	ELAQIAGRPT(1)EDEDEKEK	3	0.78763	2		0.807	0.787		1.406		1.001	1.017	1.041	0.932	1.018	0.992		0.794	0.756		1.381		1.783
O15372	183	S	Eukaryotic translation initiation factor 3 subunit H	EIF3H	1	2.00E-06	104.41	EKDFS(1)PEALKK	3	0.8382	16	1.543	0.936	0.939	0.766	0.998	0.817	0.884	0.815	0.938	1.056	1.181	1.125	1.745	1.148	1.001	0.725	0.845	0.726	0.590	8.24E-02
O15400	131	S	Syntaxin-7	STX7	0.999781	4.80E-05	85.397	VSGS(1)FPEDSSK	2	0.29226	3	1.681		0.846	0.473			1.009	1.009	1.058	0.982	1.053	0.890	1.666		0.800	0.482			0.391
O15400	129	S	Syntaxin-7	STX7	0.992952	4.80E-05	85.397	VS(0.993)GS(0.007)FPEDSSK	2	0.79188	7	1.176	1.286		0.926	0.342	1.27	1.009	1.009	1.058	0.982	1.053	0.890	1.166	1.275		0.943	0.325	1.427	0.736	4.93E-01
O15400	79	T	Syntaxin-7	STX7	0.986593	2.26E-09	119.65	EFGSLPT(0.009)T(0.987)PS(0.005)EQR	2	0.22449	11	0.962	1.091	0.894	1.011	1.097	0.946	1.009	1.009	1.058	0.982	1.053	0.890	0.953	1.081	0.845	1.030	1.042	1.063	1.088	2.86E-01
O15400	126	S	Syntaxin-7	STX7	0.805167	4.80E-05	85.397	AS(0.189)S(0.805)RVS(0.463)GS(0.462)FPEDS(0.069)S(0.012)K	2	-3.1723	3		1.036	0.728	1.08	1.23	0.927	1.009	1.009	1.058	0.982	1.053	0.890		1.027	0.688	1.100	1.168	1.042	1.287	1.66E-01
O15417	1540	S	Trinucleotide repeat-containing gene 18 protein	TNRC18	0.999982	8.07E-07	108.97	THAPSALS(1)PPR	2	-0.54865	18	0.962	1.053	1.067	0.859	1.085	0.976	1.024	1.031	1.016	1.001	0.965	0.963	0.939	1.021	1.050	0.858	1.124	1.013	0.995	9.55E-01
O15417	1359	S	Trinucleotide repeat-containing gene 18 protein	TNRC18	1	3.39E-07	98.062	PLPS(1)PGAAGAQALEK	2	-0.43489	12	1.365	0.76	0.995	1.043	0.968	0.869	1.024	1.031	1.016	1.001	0.965	0.963	1.333	0.737	0.979	1.042	1.003	0.902	0.967	8.58E-01
O15417	2543	S	Trinucleotide repeat-containing gene 18 protein	TNRC18	0.899956	1.55E-05	41.491	ATDGDLAQEPGPGLT(0.024)FEDS(0.075)GNPKS(0.9)PDK	3	1.2214	1	1.352	1.024			0.833	0.791	1.024	1.031	1.016	1.001	0.965	0.963	1.320	0.993			0.863	0.821	0.728	1.97E-01
O15417	1857	S	Trinucleotide repeat-containing gene 18 protein	TNRC18	1	2.21E-17	139.46	ALS(1)PGLEESGLGLLAR	2	-0.28454	5	0.825		1.203	0.899	1.145	0.928	1.024	1.031	1.016	1.001	0.965	0.963	0.806		1.184	0.898	1.187	0.964	1.021	9.14E-01
O15417	1127	S	Trinucleotide repeat-containing gene 18 protein	TNRC18	1	1.70E-07	100.76	LALS(1)PEDKPIRLS(0.99)PS(0.01)K	3	0.44093	6	1.096	0.987	0.953	1.091	0.934	0.94	1.024	1.031	1.016	1.001	0.965	0.963	1.070	0.957	0.938	1.090	0.968	0.976	1.023	7.10E-01
O15417	1136	S	Trinucleotide repeat-containing gene 18 protein	TNRC18	0.990228	1.70E-07	100.76	LALS(1)PEDKPIRLS(0.99)PS(0.01)K	3	0.44093	6	1.096	0.987	0.953	1.091	0.934	0.94	1.024	1.031	1.016	1.001	0.965	0.963	1.070	0.957	0.938	1.090	0.968	0.976	1.023	7.10E-01
O15417	2146	T	Trinucleotide repeat-containing gene 18 protein	TNRC18	1	1.14E-04	85.493	GGAVERPLT(1)PAPR	3	-0.081051	5	1.208	0.86	1	0.965	1.275	0.692	1.024	1.031	1.016	1.001	0.965	0.963	1.180	0.834	0.984	0.964	1.321	0.719	1.002	9.93E-01
O15432	74	S	Probable low affinity copper uptake protein 2	SLC31A2	0.980818	1.89E-17	69.035	LLNQVLVNLPT(0.192)S(0.211)IS(0.254)QQT(0.338)IAET(0.03)DGDS(0.981)AGS(0.893)DS(0.102)FPVGR	4	0.49129	1		1.455	0.797	0.922	0.825
O15432	77	S	Probable low affinity copper uptake protein 2	SLC31A2	0.893118	1.89E-17	69.035	LLNQVLVNLPT(0.192)S(0.211)IS(0.254)QQT(0.338)IAET(0.03)DGDS(0.981)AGS(0.893)DS(0.102)FPVGR	4	0.49129	1		1.455	0.797	0.922	0.825
O15439	646	T	Multidrug resistance-associated protein 4	ABCC4	0.922934	6.33E-25	147.64	DNEESEQPPVPGT(0.923)PT(0.077)LR	2	0.86705	13	1.287	0.893	1.117	0.823	1.033	0.847	1.095	0.980	1.101	0.978	0.941	0.905	1.175	0.911	1.015	0.842	1.098	0.936	0.927	5.21E-01
O15446	128	S	DNA-directed RNA polymerase I subunit RPA34	CD3EAP	0.83325	8.52E-16	68.377	ILEGPQQS(0.003)LS(0.167)GS(0.833)PLQPIPAS(0.997)PPPQIPPGLRPR	4	0.42206	6	0.794	1.094		1.01	1.102		1.067	0.964	1.041	0.971	0.947	1.009	0.744	1.135		1.040	1.164		1.173	5.11E-01
O15446	136	S	DNA-directed RNA polymerase I subunit RPA34	CD3EAP	0.998258	8.52E-16	68.377	ILEGPQQS(0.028)LS(0.251)GS(0.723)PLQPIPAS(0.998)PPPQIPPGLRPR	4	0.27665	8	0.835	1.151	0.853	1.063	1.159	0.94	1.067	0.964	1.041	0.971	0.947	1.009	0.783	1.194	0.819	1.095	1.224	0.932	1.162	3.87E-01
O15446	285	S	DNA-directed RNA polymerase I subunit RPA34	CD3EAP	0.955135	9.01E-82	215.84	QEQINTEPLEDT(0.004)VLS(0.955)PT(0.041)K	3	-0.10993	25	1.498	0.972	1.083	0.896	0.765	0.786	1.067	0.964	1.041	0.971	0.947	1.009	1.404	1.008	1.040	0.923	0.808	0.779	0.727	7.93E-02
O15516	427	S	Circadian locomoter output cycles protein kaput	CLOCK	0.961719	1.98E-03	54.683	FDHS(0.962)PT(0.038)PSASSR	3	-0.00086217	2		1.231	0.823	0.946
O15541	6	S	RING finger protein 113A	RNF113A	1	5.02E-04	133.12	AEQLS(1)PGK	2	0.1765	10	0.899	0.935	1.109	0.881	1.057	1.119	0.260	0.305		1.550	1.885		3.458	3.066		0.568	0.561		0.173	5.24E-03
O15541	46	S	RING finger protein 113A	RNF113A	0.936838	1.05E-29	117.61	RPACDPEPGES(0.015)GS(0.111)S(0.937)S(0.937)DEGCTVVRPEK	3	1.4317	10	0.968	1.326	1.169	0.738	1.227	0.572	0.260	0.305		1.550	1.885		3.723	4.348		0.476	0.651		0.140	8.61E-03
O15541	47	S	RING finger protein 113A	RNF113A	0.936838	1.05E-29	117.61	RPACDPEPGES(0.015)GS(0.111)S(0.937)S(0.937)DEGCTVVRPEK	3	1.4317	10	0.968	1.326	1.169	0.738	1.227	0.572	0.260	0.305		1.550	1.885		3.723	4.348		0.476	0.651		0.140	8.61E-03
O15550	829	S	Lysine-specific demethylase 6A	KDM6A	0.892451	4.08E-13	100.59	TDNSVASSPSSAIS(0.001)T(0.011)AT(0.095)PS(0.892)PK	2	-0.064109	5	0.834	0.954		1.214	1.144	0.855	1.223	0.831	1.193	0.942	0.772	1.040	0.682	1.148		1.289	1.482	0.822	1.309	4.25E-01
O43149	1518	S	Zinc finger ZZ-type and EF-hand domain-containing protein 1	ZZEF1	0.924674	2.04E-30	118.01	LPSSSGLPAADVSPATAEEPLS(0.925)PS(0.054)T(0.016)PT(0.005)R	3	0.69597	5	0.764	0.767	1.042	1.257	1.152	1.018
O43150	701	S	Arf-GAP with SH3 domain, ANK repeat and PH domain-containing protein 2	ASAP2	1	6.75E-05	74.776	LLHEDLDES(1)DDDMDEK	2	-0.87226	2	1.135	0.72		0.792	0.867	1.486						1.000						1.486
O43150	822	S	Arf-GAP with SH3 domain, ANK repeat and PH domain-containing protein 2	ASAP2	0.917326	1.30E-03	48.214	S(0.041)S(0.041)S(0.917)DPPAVHPPLPPLR	3	0.47495	3	0.883	0.667	0.625	1.559	1.266							1.000
O43159	106	S	Ribosomal RNA-processing protein 8	RRP8	1	4.50E-14	124.29	QGPPCS(1)DS(1)EEEVER	2	-1.2173	5	1.356					0.644	1.063	0.929	1.069	0.894	1.007	1.039	1.276					0.620	0.486
O43159	223	S	Ribosomal RNA-processing protein 8	RRP8	0.999947	1.03E-02	62.78	TEVS(1)PVPR	2	0.13182	7	0.787		1.202			1.011	1.063	0.929	1.069	0.894	1.007	1.039	0.740		1.124			0.973	1.044
O43159	176	S	Ribosomal RNA-processing protein 8	RRP8	0.788126	4.77E-06	91.414	QSPGS(0.009)T(0.202)S(0.788)PKPPHTLSR	3	-0.53665	16	1.234	0.75	1.108	1.054		0.853	1.063	0.929	1.069	0.894	1.007	1.039	1.161	0.807	1.036	1.179		0.821	0.998	9.94E-01
O43164	309	S	E3 ubiquitin-protein ligase Praja-2	PJA2	0.779499	3.26E-10	117.8	NHGS(0.221)S(0.779)PEQVVRPK	3	-0.057786	5	0.844		1.051	1.234		0.872	0.950	0.948		0.938	0.921	1.243	0.888			1.316		0.702	1.135
O43166	1565	S	Signal-induced proliferation-associated 1-like protein 1	SIPA1L1	0.820437	1.35E-07	89.659	FHALS(0.17)S(0.82)PQS(0.009)PFPSTPTSR	3	0.76023	4		0.836		1.126	0.852	1.186	0.799	0.925	1.008	1.138	1.126	1.003		0.904		0.989	0.757	1.182	1.080
O43166	1181	S	Signal-induced proliferation-associated 1-like protein 1	SIPA1L1	1	3.22E-04	145.09	RS(1)PASIDR	2	0.16886	5	1.695	0.681	0.64	0.978	0.913	1.093	0.799	0.925	1.008	1.138	1.126	1.003	2.121	0.736	0.635	0.859	0.811	1.090	0.790	6.43E-01
O43166	208	S	Signal-induced proliferation-associated 1-like protein 1	SIPA1L1	0.84814	1.29E-03	70.089	EYGS(0.848)T(0.119)S(0.027)S(0.006)IDK	2	0.67212	4	0.611	0.534	0.573	1.411	1.87		0.799	0.925	1.008	1.138	1.126	1.003	0.765	0.577	0.568	1.240	1.661		2.277	1.94E-02
O43166	1585	S	Signal-induced proliferation-associated 1-like protein 1	SIPA1L1	0.999971	1.58E-31	186.56	TLS(1)DESIYNSQR	2	-0.034092	9	1.253	0.81	0.797	1.154	0.981	1.005	0.799	0.925	1.008	1.138	1.126	1.003	1.568	0.876	0.791	1.014	0.871	1.002	0.893	6.68E-01
O43166	1549	S	Signal-induced proliferation-associated 1-like protein 1	SIPA1L1	0.992752	7.99E-28	165.34	LIDLES(0.993)PT(0.007)PESQK	2	1.0253	9	1.155	0.924	0.744	1.03	1.157	0.991	0.799	0.925	1.008	1.138	1.126	1.003	1.446	0.999	0.738	0.905	1.028	0.988	0.918	6.99E-01
O43172	483	S	U4/U6 small nuclear ribonucleoprotein Prp4	PRPF4	0.999974	2.27E-05	93.478	IWTHPGWS(1)PLK	2	-0.14265	14	0.689	0.766		1.271	1.333	0.942	1.062	0.941	0.991	1.013	0.984	1.009	0.649	0.814		1.255	1.355	0.934	1.615	8.27E-02
O43237	194	S	Cytoplasmic dynein 1 light intermediate chain 2	DYNC1LI2	1	1.80E-49	156.05	DFQDYMEPEEGCQGS(1)PQR	2	0.73114	13		1.135	0.898	0.807	1.159		1.058	1.010	1.126	1.030	0.875	0.900		1.124	0.798	0.783	1.325		1.097	7.95E-01
O43290	448	S	U4/U6.U5 tri-snRNP-associated protein 1	SART1	1	1.33E-64	187.72	RVS(1)EVEEEKEPVPQPLPSDDTR	4	0.72488	51	0.847	0.802	0.915	1.113	1.203	1.12	0.991	0.997	0.983	0.999	1.061	0.968	0.855	0.804	0.931	1.114	1.134	1.157	1.315	2.19E-03
O43303	170	S	Centriolar coiled-coil protein of 110 kDa	CCP110	0.999873	2.68E-02	54.871	DSEGFNS(1)PK	2	0.020542	3	1.001	0.923	0.955	0.967	1.154
O43310	18	S	CBP80/20-dependent translation initiation factor	CTIF	1	5.56E-06	134.99	S(1)QEIEELER	2	-0.72319	8	1.019	1.027	0.844	0.831	1.408	0.871			0.702		1.298				1.202		1.085		0.902
O43310	299	S	CBP80/20-dependent translation initiation factor	CTIF	0.999727	2.11E-15	119.4	S(1)PDTLAPVASER	2	1.1956	7	1.145	1.049	0.756	0.76		1.29			0.702		1.298				1.077
O43318	439	S	Mitogen-activated protein kinase kinase kinase 7	MAP3K7	1	1.13E-35	167.45	S(1)IQDLTVTGTEPGQVSSR	2	0.84142	11	1.031	0.939	1.015	1.113	1.007	0.895	1.002	1.052	1.400	0.914	0.779	0.853	1.029	0.893	0.725	1.218	1.293	1.049	1.345	5.53E-02
O43379	1123	S	WD repeat-containing protein 62	WDR62	0.999985	1.24E-03	62.055	ATQCLVKS(1)PEVK	3	-0.60991	2			0.508	0.933	1.713	0.845	1.094			0.906						1.030
O43379	1228	S	WD repeat-containing protein 62	WDR62	0.984719	7.90E-51	172.81	S(0.015)IS(0.985)LGDSEGPIVATLAQPLR	2	-0.40335	5	1.119	0.922	1.001	0.743	1.3	0.915	1.094			0.906			1.023			0.820			0.802
O43395	619	S	U4/U6 small nuclear ribonucleoprotein Prp3	PRPF3	1	5.14E-41	197.7	GDDDEES(1)DEEAVKK	3	0.31164	34	0.977	0.947	0.871	1.192	0.888	1.126	0.975	0.954	0.967	1.046	1.032	1.027	1.002	0.993	0.901	1.140	0.860	1.096	1.069	5.09E-01
O43395	133	S	U4/U6 small nuclear ribonucleoprotein Prp3	PRPF3	0.934495	1.41E-10	70.572	FEEVEEEPEVIPGPPS(0.021)ES(0.934)PGMLT(0.044)K	3	0.85726	1		1.227				0.773	0.975	0.954	0.967	1.046	1.032	1.027		1.286				0.753	0.585
O43399	21	S	Tumor protein D54	TPD52L2	0.832993	3.75E-07	76.015	GLLS(0.141)DS(0.833)MT(0.026)DVPVDTGVAAR	2	-1.8621	3	0.971				1.029		1.009	1.039	0.960	0.959	1.004	1.030	0.962				1.025		1.065
O43399	12	S	Tumor protein D54	TPD52L2	1	6.23E-42	169.58	MDSAGQDINLNS(1)PNK	2	0.18751	14	0.875	1.118	0.83	1.146	1.073	0.959	1.009	1.039	0.960	0.959	1.004	1.030	0.867	1.076	0.865	1.195	1.069	0.931	1.138	2.81E-01
O43426	1565	S	Synaptojanin-1	SYNJ1	0.993523	2.82E-03	64.441	AS(0.994)PT(0.006)LDFTER	2	0.11536	3	0.681		0.976	1.088	1.333	0.921
O43426	1053	S	Synaptojanin-1	SYNJ1	0.795169	8.87E-07	56.172	T(0.074)S(0.074)PCQS(0.795)PT(0.05)IS(0.006)EGPVPSLPIRPSR	3	0.60756	1		1.172	0.763	0.965	1.1
O43432	495	S	Eukaryotic translation initiation factor 4 gamma 3	EIF4G3	1	7.50E-05	89.604	RS(1)PVPAQIAITVPK	3	0.053556	18	1.542	0.627	0.775	0.967	0.929	1.161	0.960	0.931	0.877	1.017	1.060	1.155	1.606	0.673	0.884	0.951	0.876	1.005	0.895	7.18E-01
O43432	232	S	Eukaryotic translation initiation factor 4 gamma 3	EIF4G3	0.999993	2.92E-03	133.58	SPS(1)PVLR	2	0.26639	17	1.123	0.862	1.052	1.234	0.864	0.864	0.960	0.931	0.877	1.017	1.060	1.155	1.170	0.926	1.200	1.213	0.815	0.748	0.843	3.64E-01
O43439	264	S	Protein CBFA2T2	CBFA2T2	0.999899	6.21E-06	134.3	VCTIS(1)PAPR	2	0.0085826	3	0.789	1.104	1.256	0.881	0.991	0.979		0.933	1.166	1.023	0.878			1.183	1.077	0.861	1.129		0.880	4.46E-01
O43463	391	S	Histone-lysine N-methyltransferase SUV39H1	SUV39H1	0.999998	1.65E-04	73.294	MDSNFGLAGLPGS(1)PK	2	-0.095015	2	1.283		1.16	1.053	0.902	0.602
O43491	718	S	Band 4.1-like protein 2	EPB41L2	0.981797	1.93E-05	91.076	EIS(0.018)PGS(0.982)GPGEIR	2	-1.2858	6	0.684			1.037	1.28		1.025	1.003	1.064	0.968	0.966	0.975	0.667			1.071	1.325		1.795
O43491	715	S	Band 4.1-like protein 2	EPB41L2	1	1.06E-16	143.58	EIS(1)PGSGPGEIR	2	-0.64004	23	0.639	0.997	0.92	1.205	1.273	0.966	1.025	1.003	1.064	0.968	0.966	0.975	0.623	0.994	0.865	1.245	1.318	0.991	1.432	7.21E-02
O43491	39	S	Band 4.1-like protein 2	EPB41L2	0.937417	6.35E-39	120.18	EVAENQQNQS(0.063)S(0.937)DPEEEK	2	0.41721	20	0.74	0.99	0.933	0.985	1.171	1.181	1.025	1.003	1.064	0.968	0.966	0.975	0.722	0.987	0.877	1.018	1.212	1.211	1.331	4.70E-02
O43491	499	S	Band 4.1-like protein 2	EPB41L2	1	1.72E-05	117.09	LVS(1)PEQPPK	2	0.191	10	0.759	0.989	1.014	1.007	1.262	0.97	1.025	1.003	1.064	0.968	0.966	0.975	0.740	0.986	0.953	1.040	1.306	0.995	1.247	1.50E-01
O43491	600	T	Band 4.1-like protein 2	EPB41L2	0.816051	2.07E-03	67.994	S(0.184)PT(0.816)KAPHLQLIEGK	3	0.2922	1			0.38	1.355	1.265		1.025	1.003	1.064	0.968	0.966	0.975			0.357	1.400	1.310		3.793
O43583	73	S	Density-regulated protein	DENR	1	1.32E-30	160.77	LTVENS(1)PK	2	0.20331	24	0.769	1.18	1.067	0.773	1.274	0.936	0.964	0.982	0.945	0.986	1.077	1.045	0.798	1.202	1.129	0.784	1.183	0.896	0.915	6.34E-01
O43598	169	S	2'-deoxynucleoside 5'-phosphate N-hydrolase 1	DNPH1	0.92416	2.14E-05	64.522	YFEADPPGQVAAS(0.924)PDPT(0.061)T(0.015)	2	0.27133	2	1.094	0.886	0.836	0.98	1.215	0.99	0.726	1.021	0.711	1.271	1.094	1.177	1.507	0.868	1.176	0.771	1.111	0.841	0.767	2.62E-01
O43719	713	S	HIV Tat-specific factor 1	HTATSF1	0.999159	7.94E-07	69.704	LFEDDDS(0.999)NEKLFDEEEDS(0.999)S(0.999)EKLFDDS(0.002)DER	3	-0.60792	7	1.557	0.64	0.884	0.934	0.888	1.097	0.873	0.955	0.871	1.063	1.170	1.068	1.784	0.670	1.015	0.879	0.759	1.027	0.768	4.72E-01
O43719	721	S	HIV Tat-specific factor 1	HTATSF1	1	2.11E-03	79.659	LFDDS(1)DER	2	0.15155	6	0.841	0.962	0.945	0.931	1.323	0.998	0.873	0.955	0.871	1.063	1.170	1.068	0.963	1.007	1.085	0.876	1.131	0.934	0.963	6.76E-01
O43719	676	S	HIV Tat-specific factor 1	HTATSF1	1	8.01E-32	161.95	LFEES(1)DDKEDEDADGKEVEDADEK	4	-0.12977	26	1.126	0.525	0.657	1.617		1.075	0.873	0.955	0.871	1.063	1.170	1.068	1.290	0.550	0.754	1.521		1.007	1.462	3.29E-01
O43719	579	S	HIV Tat-specific factor 1	HTATSF1	1	1.00E-13	122.53	DLDEEGS(1)EKELHENVLDK	3	-0.060899	13	0.98	0.785	0.972	1.129	1.213	0.921	0.873	0.955	0.871	1.063	1.170	1.068	1.123	0.822	1.116	1.062	1.037	0.862	0.968	7.92E-01
O43719	702	S	HIV Tat-specific factor 1	HTATSF1	1	1.97E-18	174.05	LFEDDDS(1)NEK	2	-0.51322	11	0.897	1.092	0.693	1.055	1.247	1.016	0.873	0.955	0.871	1.063	1.170	1.068	1.027	1.143	0.796	0.992	1.066	0.951	1.014	9.00E-01
O43719	453	S	HIV Tat-specific factor 1	HTATSF1	0.95026	1.73E-16	138.77	ES(0.05)S(0.95)PEKEAEEGCPEK	2	-0.42704	9		0.948	1.038	1.028	0.985		0.873	0.955	0.871	1.063	1.170	1.068		0.993	1.192	0.967	0.842		0.828	2.51E-01
O43719	498	S	HIV Tat-specific factor 1	HTATSF1	0.999981	5.13E-06	67.877	ESEEGNPVRGS(1)EEDS(1)PKK	3	-0.51804	2	1.056	1.002		0.851	1.09		0.873	0.955	0.871	1.063	1.170	1.068	1.210	1.049		0.801	0.932		0.767	1.26E-01
O43719	642	S	HIV Tat-specific factor 1	HTATSF1	1	1.54E-34	155.16	VFDDES(1)DEKEDEEYADEK	2	-0.25739	8			0.857	1.143			0.873	0.955	0.871	1.063	1.170	1.068			0.984	1.075			1.093
O43719	529	S	HIV Tat-specific factor 1	HTATSF1	0.999991	4.28E-58	188.26	ESEDDLNKES(1)EEEVGPTK	2	0.17452	12	1.218	0.984	0.791	1.184	1.11	0.713	0.873	0.955	0.871	1.063	1.170	1.068	1.395	1.030	0.908	1.114	0.949	0.668	0.819	3.62E-01
O43719	494	S	HIV Tat-specific factor 1	HTATSF1	0.999957	5.13E-06	67.877	ESEEGNPVRGS(1)EEDS(1)PKK	3	-0.51804	2	1.056	1.002		0.851	1.09		0.873	0.955	0.871	1.063	1.170	1.068	1.210	1.049		0.801	0.932		0.767	1.26E-01
O43719	616	S	HIV Tat-specific factor 1	HTATSF1	1	6.11E-07	143.97	VLDEEGS(1)ER	2	-0.12626	7	0.846	0.725	0.676	1.244	1.289	1.22	0.873	0.955	0.871	1.063	1.170	1.068	0.969	0.759	0.776	1.170	1.102	1.142	1.363	1.24E-02
O43765	81	T	Small glutamine-rich tetratricopeptide repeat-containing protein alpha	SGTA	0.998058	4.51E-05	66.772	S(0.999)PART(0.998)PPS(0.002)EEDSAEAER	3	-0.48141	2	0.899	1.001	0.868	0.752	1.326	1.154	0.986	0.988	0.900	1.018	1.017	1.089	0.912	1.013	0.964	0.739	1.304	1.060	1.074	6.91E-01
O43765	77	S	Small glutamine-rich tetratricopeptide repeat-containing protein alpha	SGTA	1	4.51E-05	82.069	EMPQDLRS(1)PAR	3	0.66256	28	0.874	0.996	0.816	0.917	1.377	1.02	0.986	0.988	0.900	1.018	1.017	1.089	0.886	1.008	0.907	0.901	1.354	0.937	1.139	4.35E-01
O43768	2	S	Alpha-endosulfine	ENSA	1	2.94E-123	268.25	S(1)QKQEEENPAEETGEEK	3	-0.18967	15	0.252	0.295	0.286	1.485	2.323	1.359	1.059	1.142	1.381	0.513	0.877	1.028	0.238	0.258	0.207	2.895	2.649	1.322	9.761	1.37E-02
O43818	50	S	U3 small nucleolar RNA-interacting protein 2	RRP9	0.999835	2.29E-45	171.79	MNEEIS(1)S(1)DS(0.973)ES(0.026)ES(0.002)LAPR	2	0.084388	37	0.287		2.205	1.911	0.353	0.244	1.069	1.000	1.043	0.923	0.967	0.998	0.268		2.114	2.070	0.365	0.244	0.750	7.90E-01
O43818	53	S	U3 small nucleolar RNA-interacting protein 2	RRP9	0.99516	5.68E-59	197.1	MNEEISS(0.001)DS(0.995)ES(0.003)ESLAPR	3	-0.64071	67	1.237	0.843	0.821	1.097	0.908	1.094	1.069	1.000	1.043	0.923	0.967	0.998	1.157	0.843	0.787	1.189	0.939	1.096	1.157	3.46E-01
O43818	51	S	U3 small nucleolar RNA-interacting protein 2	RRP9	0.999514	1.16E-34	160.27	MNEEIS(1)S(1)DS(0.973)ES(0.026)ES(0.002)LAPR	2	0.084388	33	2.98	0.175	0.265	0.195	1.065	1.32	1.069	1.000	1.043	0.923	0.967	0.998	2.788	0.175	0.254	0.211	1.101	1.323	0.819	8.44E-01
O43818	55	S	U3 small nucleolar RNA-interacting protein 2	RRP9	0.94895	2.05E-13	123.19	MNEEISSDS(0.009)ES(0.949)ES(0.042)LAPR	2	-2.1324	4		1.186		0.835	0.98		1.069	1.000	1.043	0.923	0.967	0.998		1.186		0.905	1.013		0.809
O43823	339	S	A-kinase anchor protein 8	AKAP8	1	1.10E-19	111.57	S(1)GDEEFKGEDELCDSGR	2	0.12537	7	1.698	0.881	0.643		0.78	0.998	1.043	0.999	0.982	0.995	1.058	0.922	1.628	0.882	0.655		0.737	1.082	0.862	7.41E-01
O43823	328	S	A-kinase anchor protein 8	AKAP8	0.996551	3.50E-06	68.291	VDS(0.003)EGDFS(0.997)ENDDAAGDFR	2	-0.10384	3	1.285	0.919		0.806	1.058	0.932	1.043	0.999	0.982	0.995	1.058	0.922	1.232	0.920		0.810	1.000	1.011	0.874	4.14E-01
O43823	323	S	A-kinase anchor protein 8	AKAP8	0.999922	3.38E-09	98.543	VDS(1)EGDFSENDDAAGDFR	2	0.061974	6	1.18	0.777			0.69	1.353	1.043	0.999	0.982	0.995	1.058	0.922	1.131	0.778			0.652	1.467	1.110	8.35E-01
O43866	290	S	CD5 antigen-like	CD5L	0.982724	7.14E-02	45.598	S(0.983)LS(0.013)PS(0.004)FRDRK	2	-1.0614	1	1.246	0.629	0.928	1.039	1.028	1.131
O43896	915	S	Kinesin-like protein KIF1C	KIF1C	0.824638	8.29E-05	67.396	MPS(0.167)ARPPS(0.825)PPLS(0.006)S(0.003)WER	3	-0.13052	5	0.951		0.962	1.146	0.941							1.000
O43896	676	S	Kinesin-like protein KIF1C	KIF1C	0.999647	8.14E-06	94.845	LYADS(1)DS(1)GDDSDKR	3	0.67656	6	1.167	0.483	0.704	1.659	0.938	1.049						1.000						1.049
O43896	494	S	Kinesin-like protein KIF1C	KIF1C	0.997087	1.12E-02	52.372	EDGGT(0.003)VGVFS(0.997)PK	2	-0.013184	1	1.154	0.707		1.273	0.866							1.000
O43896	1083	T	Kinesin-like protein KIF1C	KIF1C	0.807366	4.89E-04	90.913	YPPYT(0.193)T(0.807)PPR	2	0.55116	1	0.67	0.69	0.667	1.466	1.29	1.217						1.000						1.217
O43896	674	S	Kinesin-like protein KIF1C	KIF1C	0.99997	8.14E-06	94.845	LYADS(1)DS(1)GDDSDKR	3	0.67656	6	1.167	0.483	0.704	1.659	0.938	1.049						1.000						1.049
O43933	1211	S	Peroxisome biogenesis factor 1	PEX1	0.979148	2.39E-07	100.97	S(0.021)QS(0.979)GEDESMNQPGPIK	2	-0.70375	12	1.252	0.838	1.18	0.792	1.222	0.717	0.987	1.184	1.197		0.810	0.822	1.268	0.708	0.986		1.509	0.872	1.206	5.66E-01
O60220	94	S	Mitochondrial import inner membrane translocase subunit Tim8 A	TIMM8A	0.833804	7.49E-03	54.871	SKPVFS(0.129)ES(0.834)LS(0.037)D	2	-0.40551	6	0.944	0.848	0.832	1.177	1.159	1.04	0.972	1.047	1.116	0.965	0.968	0.933	0.971	0.810	0.746	1.220	1.197	1.115	1.398	1.08E-02
O60231	103	S	Putative pre-mRNA-splicing factor ATP-dependent RNA helicase DHX16	DHX16	0.999988	1.28E-31	161.19	LLEDS(1)EES(0.901)S(0.099)EETVSR	2	-0.65002	35	0.998	1.084	0.773	1.284	0.776	1.084	0.858	0.878	0.877	1.052	1.091	1.244	1.163	1.235	0.881	1.221	0.711	0.871	0.855	4.39E-01
O60231	106	S	Putative pre-mRNA-splicing factor ATP-dependent RNA helicase DHX16	DHX16	0.983389	1.09E-41	170.11	LLEDS(0.019)EES(0.983)S(0.989)EET(0.008)VSR	2	-0.60633	63	0.829	0.893	1	1.151	1.195	0.933	0.858	0.878	0.877	1.052	1.091	1.244	0.966	1.017	1.140	1.094	1.095	0.750	0.941	6.52E-01
O60231	160	S	Putative pre-mRNA-splicing factor ATP-dependent RNA helicase DHX16	DHX16	0.9999	1.77E-27	155.88	QQTEKPES(1)EDEWER	2	-0.18224	25	0.856	1.189	0.021	1.408	1.376	1.149	0.858	0.878	0.877	1.052	1.091	1.244	0.998	1.354	0.024	1.338	1.261	0.924	1.483	4.11E-01
O60231	107	S	Putative pre-mRNA-splicing factor ATP-dependent RNA helicase DHX16	DHX16	0.990496	3.12E-07	102.98	LLEDS(0.094)EES(0.909)S(0.99)EET(0.006)VSR	2	-0.23929	14	1.109	0.758	0.801	1.284	0.959	1.089	0.858	0.878	0.877	1.052	1.091	1.244	1.293	0.863	0.913	1.221	0.879	0.875	0.969	8.68E-01
O60238	120	S	BCL2/adenovirus E1B 19 kDa protein-interacting protein 3-like	BNIP3L	0.968537	8.23E-17	139.11	DHS(0.001)S(0.03)QS(0.969)EEEVVEGEK	2	-0.71715	5	0.691	0.986	0.805		1.518		1.190	0.723	1.168			0.919	0.581	1.364	0.689
O60244	617	S	Mediator of RNA polymerase II transcription subunit 14	MED14	1	1.72E-24	175.69	KLS(1)DDPCPVESK	2	0.13517	9	1.203	0.906	1.102	1.124	0.871	0.794	1.193	0.948	0.771	1.049	0.853	1.186	1.008	0.956	1.429	1.071	1.021	0.669	0.814	3.44E-01
O60245	1011	S	Protocadherin-7	PCDH7	0.953764	2.16E-08	91.238	SSSPLPTVQLHPQS(0.954)PT(0.046)AGK	3	0.71325	6	0.774		0.533	1.298	1.352	1.043				1.000						1.298
O60248	37	S	Protein SOX-15	SOX15	1	1.47E-16	136.43	EGAGS(1)PAAPGTLPLEK	2	0.79713	12	1.077	0.998	0.797	1.027	1.037	1.063	0.908	0.897	0.924	1.141	1.058	1.072	1.186	1.113	0.863	0.900	0.980	0.992	0.908	3.98E-01
O60256	227	S	Phosphoribosyl pyrophosphate synthase-associated protein 2	PRPSAP2	1	3.39E-03	85.666	HS(1)PPMVR	2	-2.7295	4	1.122			0.915	1.239	0.725	1.143	0.901	0.955	0.929	1.002	1.070	0.982			0.985	1.237	0.678	0.984
O60264	116	S	SWI/SNF-related matrix-associated actin-dependent regulator of chromatin subfamily A member 5	SMARCA5	0.997009	4.85E-06	122.33	TPT(0.003)S(0.997)PLK	2	0.52695	12	1.174	1.08	1.055	0.905	0.978	0.808	1.006	1.006	1.028	0.995	0.937	1.029	1.167	1.074	1.026	0.910	1.044	0.785	0.838	1.08E-01
O60264	66	S	SWI/SNF-related matrix-associated actin-dependent regulator of chromatin subfamily A member 5	SMARCA5	1	9.79E-45	116.1	GGPEGVAAQAVASAASAGPADAEMEEIFDDAS(1)PGK	3	-0.30967	27	1.044	0.991	0.97	1.308	0.655	1.032	1.006	1.006	1.028	0.995	0.937	1.029	1.038	0.985	0.944	1.315	0.699	1.003	1.017	9.30E-01
O60264	113	T	SWI/SNF-related matrix-associated actin-dependent regulator of chromatin subfamily A member 5	SMARCA5	0.856068	4.85E-06	56.623	QTELFAHFIQPAAQKT(0.856)PT(0.478)S(0.666)PLK	3	0.23419	2	1.121	1.176	1.061	0.903	0.795	0.943	1.006	1.006	1.028	0.995	0.937	1.029	1.114	1.169	1.032	0.908	0.848	0.916	0.806	8.98E-03
O60271	733	S	C-Jun-amino-terminal kinase-interacting protein 4	SPAG9	0.988081	1.38E-15	130.02	S(0.022)AS(0.892)QS(0.098)S(0.988)LDKLDQELK	2	0.66932	20	1.525	0.788	0.842	1.042	0.974	0.828	0.926	0.908	0.950	1.082	0.993	1.141	1.647	0.868	0.886	0.963	0.981	0.726	0.785	4.17E-01
O60271	217	T	C-Jun-amino-terminal kinase-interacting protein 4	SPAG9	1	2.19E-28	132.04	ERPISLGIFPLPAGDGLLT(1)PDAQK	3	0.25941	7	0.594	0.609	0.479	1.174	1.722	1.422	0.926	0.908	0.950	1.082	0.993	1.141	0.641	0.671	0.504	1.085	1.734	1.246	2.238	2.06E-02
O60271	332	S	C-Jun-amino-terminal kinase-interacting protein 4	SPAG9	0.999693	4.67E-08	110.22	NVSTGS(1)AENEEK	2	-1.6253	4	1.047	1.066	1.602	0.831	0.852	0.602	0.926	0.908	0.950	1.082	0.993	1.141	1.131	1.174	1.686	0.768	0.858	0.528	0.540	3.98E-02
O60271	730	S	C-Jun-amino-terminal kinase-interacting protein 4	SPAG9	0.995415	1.38E-15	130.02	S(0.001)AS(0.995)QS(0.554)S(0.45)LDKLDQELK	3	-0.22789	19	1.173	0.702	0.794	1.231	1.17	0.931	0.926	0.908	0.950	1.082	0.993	1.141	1.267	0.773	0.836	1.138	1.178	0.816	1.089	6.81E-01
O60291	524	S	E3 ubiquitin-protein ligase MGRN1	MGRN1	0.812246	8.76E-08	92.098	AASIENVLQDS(0.188)S(0.812)PEHCGR	3	-0.59691	7	0.963	1.299	1.233		0.898	0.606						1.000						0.606
O60292	1705	T	Signal-induced proliferation-associated 1-like protein 3	SIPA1L3	0.788662	7.15E-05	87.519	T(0.103)T(0.103)PT(0.789)MS(0.005)EEPPLDLTGK	2	1.8011	3	1			1.085	0.827	1.088	0.911	0.889	0.975	1.058	1.109	1.058	1.098			1.026	0.746	1.028	0.850
O60292	1544	S	Signal-induced proliferation-associated 1-like protein 3	SIPA1L3	0.999882	2.14E-25	186.13	TLS(1)DESLCSGR	2	-0.12219	10	1.211	0.828	1.139	1	0.909	0.913	0.911	0.889	0.975	1.058	1.109	1.058	1.329	0.931	1.168	0.945	0.820	0.863	0.766	9.25E-02
O60292	146	S	Signal-induced proliferation-associated 1-like protein 3	SIPA1L3	1	1.48E-05	90.476	S(1)KDVEFQDGWPR	3	-0.83801	10	1.186	1.232	0.799	0.832	1.174	0.777	0.911	0.889	0.975	1.058	1.109	1.058	1.302	1.386	0.819	0.786	1.059	0.734	0.735	2.02E-01
O60292	401	S	Signal-induced proliferation-associated 1-like protein 3	SIPA1L3	0.814109	9.04E-23	126.23	AHSLGGLDPAFT(0.028)S(0.814)T(0.157)EDLNCK	3	0.63617	11	0.904	0.768	0.878	1.143	1.518	0.788	0.911	0.889	0.975	1.058	1.109	1.058	0.992	0.864	0.901	1.080	1.369	0.745	1.159	4.73E-01
O60292	1364	S	Signal-induced proliferation-associated 1-like protein 3	SIPA1L3	1	7.05E-15	129.94	EVS(1)PAPAVAGQSK	2	0.14205	8	0.779	0.719	1.098	1.108	1.218	1.078	0.911	0.889	0.975	1.058	1.109	1.058	0.855	0.809	1.126	1.047	1.098	1.019	1.134	2.87E-01
O60292	1135	S	Signal-induced proliferation-associated 1-like protein 3	SIPA1L3	0.996305	3.75E-10	99.078	RPVS(0.996)FPET(0.004)PYTVSPAGADR	3	0.23398	3			0.661	1.242	1.097		0.911	0.889	0.975	1.058	1.109	1.058			0.678	1.174	0.989		1.595
O60292	1685	S	Signal-induced proliferation-associated 1-like protein 3	SIPA1L3	0.931684	6.36E-16	73.602	AVSLFS(0.01)LNDPALS(0.001)PDIPPAHS(0.932)PVHS(0.04)HLS(0.017)LER	4	0.29508	5	1.164	0.942	0.858	1.036			0.911	0.889	0.975	1.058	1.109	1.058	1.278	1.060	0.880	0.979			0.913
O60292	1175	S	Signal-induced proliferation-associated 1-like protein 3	SIPA1L3	0.999994	4.74E-03	90.906	YKPS(1)PER	2	1.7333	5	1.169	0.94	0.874	0.987	0.98	1.049	0.911	0.889	0.975	1.058	1.109	1.058	1.283	1.057	0.896	0.933	0.884	0.991	0.867	2.87E-01
O60293	28	S	Zinc finger C3H1 domain-containing protein	ZFC3H1	0.99999	1.02E-22	130.83	EEGELEDGEIS(1)DDDNNSQIR	2	-0.16193	8	1.228	0.715	0.899	0.755	1.23	1.174	0.907	0.918	0.911	1.251	1.115	0.898	1.354	0.779	0.987	0.604	1.103	1.307	0.966	9.02E-01
O60293	1046	S	Zinc finger C3H1 domain-containing protein	ZFC3H1	0.999985	7.37E-06	93.777	S(1)FLESNYFTKPNLK	2	0.37495	4	1.509	0.948	0.72	1.059	0.788	0.976	0.907	0.918	0.911	1.251	1.115	0.898	1.664	1.033	0.790	0.847	0.707	1.087	0.757	3.75E-01
O60293	1304	S	Zinc finger C3H1 domain-containing protein	ZFC3H1	0.999957	5.08E-30	153.87	KPISDNSFS(1)S(1)DEEQSTGPIK	2	0.24333	23	0.933	1.018	0.714	1.728	1.064	0.545	0.907	0.918	0.911	1.251	1.115	0.898	1.029	1.109	0.784	1.381	0.954	0.607	1.007	9.78E-01
O60293	655	S	Zinc finger C3H1 domain-containing protein	ZFC3H1	0.910766	1.18E-09	66.556	AFKPEET(0.004)S(0.004)S(0.025)NS(0.056)DPPS(0.911)PPVLNNSHPVPR	4	0.77658	10	0.946	1.15	0.937	1.092		0.875	0.907	0.918	0.911	1.251	1.115	0.898	1.043	1.253	1.029	0.873		0.974	0.834	1.65E-01
O60293	766	T	Zinc finger C3H1 domain-containing protein	ZFC3H1	1	5.64E-04	69.361	ENDPLRT(1)PEALPEEK	3	0.49837	4	0.814	0.64	0.809	1.166	1.367	1.204	0.907	0.918	0.911	1.251	1.115	0.898	0.897	0.697	0.888	0.932	1.226	1.341	1.409	7.02E-02
O60293	948	S	Zinc finger C3H1 domain-containing protein	ZFC3H1	0.930997	1.14E-07	117.2	LDS(0.931)S(0.069)PVSSPR	2	0.49923	6		1.002	1.377	0.995	0.861	0.765	0.907	0.918	0.911	1.251	1.115	0.898		1.092	1.512	0.795	0.772	0.852	0.620	5.31E-02
O60293	1303	S	Zinc finger C3H1 domain-containing protein	ZFC3H1	0.999876	5.08E-30	153.87	KPISDNSFS(1)S(1)DEEQSTGPIK	2	0.24333	23	0.97	2.137	0.742	0.477	1.106	0.567	0.907	0.918	0.911	1.251	1.115	0.898	1.069	2.328	0.814	0.381	0.992	0.631	0.476	2.15E-01
O60318	527	S	Germinal-center associated nuclear protein	MCM3AP	0.982572	1.14E-22	116.1	KPGDGEVS(0.983)PS(0.017)TEDAPFQHSPLGK	3	0.049059	19	0.929	1.18	0.917	0.932		1.042	1.014	1.197	1.102	0.841	0.938	0.909	0.916	0.986	0.832	1.108		1.146	1.237	3.54E-02
O60333	1454	S	Kinesin-like protein KIF1B	KIF1B	0.916457	6.46E-06	80.371	MS(0.01)DT(0.073)GS(0.916)PGMQR	2	0.9699	2	0.869	0.986	0.827	0.977		1.341	0.817	0.857	0.764	1.059	1.286	1.217	1.064	1.151	1.082	0.923		1.102	0.921	3.32E-01
O60341	69	S	Lysine-specific histone demethylase 1A	KDM1A	0.992544	5.85E-09	49.847	EPPRAS(0.993)PPGGLAEPPGS(0.002)AGPQAGPT(0.002)VVPGS(0.002)AT(0.001)PMETGIAETPEGR	4	1.1604	6	1.082		0.681		1.372	0.865	1.030	1.001	0.923	1.018	1.000	1.028	1.050		0.738		1.372	0.841	1.238	5.61E-01
O60341	166	S	Lysine-specific histone demethylase 1A	KDM1A	0.999884	4.07E-16	71.67	LPPPPPQAPPEEENES(1)EPEEPSGVEGAAFQSR	3	0.93756	28	0.921	0.674	0.885	1.258	1.138	1.124	1.030	1.001	0.923	1.018	1.000	1.028	0.894	0.673	0.959	1.236	1.138	1.093	1.372	3.10E-02
O60343	666	S	TBC1 domain family member 4	TBC1D4	1	3.06E-04	86.803	AQGVRS(1)PLLR	3	-0.093387	12	0.854	0.962	0.955	1.293	1.225	0.711	1.006	0.922	1.060	0.873	1.066	1.073	0.849	1.043	0.901	1.481	1.149	0.663	1.179	5.33E-01
O60343	341	S	TBC1 domain family member 4	TBC1D4	0.999931	9.96E-32	158.92	HAS(1)APSHVQPSDSEK	3	-3.5571	7	0.628			1.157	1.215		1.006	0.922	1.060	0.873	1.066	1.073	0.624			1.325	1.140		1.974
O60353	620	S	Frizzled-6	FZD6	0.998189	3.56E-08	109.22	EQDCGEPAS(0.998)PAAS(0.001)ISR	2	-1.1476	6	1.403	0.801	0.805	1.056	0.877	1.058	0.980	0.957	1.177	0.855	1.053	0.978	1.432	0.837	0.684	1.235	0.833	1.082	1.067	8.10E-01
O60353	653	S	Frizzled-6	FZD6	1	7.72E-04	135.56	SEGRIS(1)PK	2	0.31595	7	0.602	1.289	1.483	0.71	1.597	0.319	0.980	0.957	1.177	0.855	1.053	0.978	0.614	1.347	1.260	0.830	1.517	0.326	0.830	6.83E-01
O60361	79	T	Putative nucleoside diphosphate kinase	NME2P1	0.999855	1.64E-08	98.175	VMLGET(1)NPADSKPGTIR	3	0.14857	1	1.086	0.683		1.102	1.13		0.930	1.079	0.960	0.981	0.910	1.140	1.168	0.633		1.123	1.242		1.313	4.11E-01
O60437	1657	S	Periplakin	PPL	1	9.05E-05	84.859	S(1)IVVIHPDTGR	2	-0.1176	6	1.426	1.24	1.303	0.509		0.522
O60437	14	S	Periplakin	PPL	0.999952	1.07E-10	145.81	GKYS(1)PTVQTR	2	-0.030303	15	0.924	1.387	1.336	0.723	1.077	0.554
O60488	679	T	Long-chain-fatty-acid--CoA ligase 4	ACSL4	0.973488	2.43E-05	73.672	LS(0.021)PEPWT(0.973)PET(0.006)GLVTDAFK	2	0.84809	6	1.117	1.254	0.978	0.99	0.804	0.857	1.077	1.131	1.175	0.855	0.903	0.859	1.037	1.109	0.832	1.158	0.890	0.998	1.023	8.52E-01
O60488	674	S	Long-chain-fatty-acid--CoA ligase 4	ACSL4	0.995918	1.91E-06	63.823	VRLS(0.996)PEPWT(0.004)PETGLVTDAFK	3	1.3705	2	0.919	0.946	1.283	0.852			1.077	1.131	1.175	0.855	0.903	0.859	0.853	0.836	1.092	0.996			1.075
O60499	134	S	Syntaxin-10	STX10	0.998551	5.20E-11	118.07	S(0.001)PS(0.999)DLLDASAVSATSR	2	0.55557	3	1.165	1.302	1.026			0.507	0.937	1.012	0.977	0.961	1.088	1.025	1.243	1.287	1.050			0.495	0.414
O60502	364	S	Protein O-GlcNAcase	MGEA5	0.999659	2.93E-07	63.095	LENEGS(1)DEDIETDVLYSPQMALK	3	-3.2013	2		0.859	1.15	0.798	0.874	1.318	1.001	0.887	0.973	1.073	1.085	0.981		0.968	1.182	0.744	0.806	1.344	0.897	6.97E-01
O60504	530	S	Vinexin	SORBS3	0.983241	7.22E-40	192.32	LCDDGPQLPT(0.017)S(0.983)PR	2	-0.11501	14	0.84	0.7	0.763	1.337	1.227	1.133	1.021	1.003	0.976				0.823	0.698	0.782
O60504	544	S	Vinexin	SORBS3	0.967167	2.24E-06	116.75	HPS(0.967)S(0.033)PSALR	2	0.38269	2	0.681			1.02	1.299		1.021	1.003	0.976				0.667
O60508	22	S	Pre-mRNA-processing factor 17	CDC40	0.954164	2.22E-66	180.62	SAAIAALAASYGSGSGSES(0.014)DS(0.954)DS(0.03)ES(0.002)SR	3	-0.69463	21		0.899	0.911	1.006	1.071	1.113	1.010	1.037	1.070	1.008	1.009	0.866		0.867	0.851	0.998	1.061	1.285	1.298	1.08E-01
O60551	38	S	Glycylpeptide N-tetradecanoyltransferase 2	NMT2	1	1.05E-07	117.86	GS(1)PGGYLGAK	2	-0.051413	14	0.971	1.015	0.885	1.104	1.114	0.911	0.880	0.849	0.884	1.239	1.055	1.093	1.103	1.196	1.001	0.891	1.056	0.833	0.843	1.18E-01
O60551	70	S	Glycylpeptide N-tetradecanoyltransferase 2	NMT2	0.891521	1.14E-03	49.094	EKPNS(0.129)GGT(0.161)KS(0.754)DS(0.977)AS(0.892)DS(0.088)QEIK	3	-0.018522	2	0.878		0.933	1.189			0.880	0.849	0.884	1.239	1.055	1.093	0.998		1.055	0.960			0.935
O60551	66	S	Glycylpeptide N-tetradecanoyltransferase 2	NMT2	0.940479	3.32E-09	79.426	EKPNS(0.003)GGT(0.003)KS(0.94)DS(0.049)AS(0.004)DSQEIK	3	0.13613	4	0.684	0.872	1.519	0.925			0.880	0.849	0.884	1.239	1.055	1.093	0.777	1.027	1.718	0.747			0.636
O60551	68	S	Glycylpeptide N-tetradecanoyltransferase 2	NMT2	0.976565	1.14E-03	49.094	EKPNS(0.129)GGT(0.161)KS(0.754)DS(0.977)AS(0.892)DS(0.088)QEIK	3	-0.018522	2	0.878		0.933	1.189			0.880	0.849	0.884	1.239	1.055	1.093	0.998		1.055	0.960			0.935
O60566	670	S	Mitotic checkpoint serine/threonine-protein kinase BUB1 beta	BUB1B	0.999955	3.31E-02	54.09	KLS(1)PIIEDSR	2	0.2696	1	1.287	0.899	0.914	0.75	1.155	0.996	0.917		1.083				1.403		0.844
O60573	13	S	Eukaryotic translation initiation factor 4E type 2	EIF4E2	0.999873	1.16E-07	66.545	FDALKDDDS(1)GDHDQNEENSTQK	3	-0.012463	4	0.912			0.86	1.58	0.648	0.989	0.849	0.870	0.882	1.245	1.166	0.922			0.975	1.269	0.556	1.012
O60610	22	S	Protein diaphanous homolog 1	DIAPH1	0.998926	2.35E-03	44.848	GRS(0.999)PDELPS(0.001)AGGDGGK	3	0.97737	2		0.722		0.954	1.106	1.218	0.924	0.960	0.934	1.082	1.116	0.986		0.752		0.882	0.991	1.235	1.378
O60716	920	S	Catenin delta-1	CTNND1	1	1.09E-06	108.23	S(1)GDLGDMEPLK	2	0.73666	5			0.69	1.038	0.844	1.428	0.972	1.076	1.073	0.958	0.960	0.962			0.643	1.084	0.879	1.484	1.787
O60716	230	S	Catenin delta-1	CTNND1	0.896487	9.52E-10	105.06	HYEDGYPGGSDNYGS(0.896)LS(0.103)R	3	-0.93255	4	1.414	0.522	1.072	0.776	0.881	1.335	0.972	1.076	1.073	0.958	0.960	0.962	1.455	0.485	0.999	0.810	0.918	1.388	1.060	8.68E-01
O60716	346	S	Catenin delta-1	CTNND1	1	1.25E-09	134.92	GS(1)LAS(1)LDSLRK	2	0.1211	38	0.756	0.556	0.556	1.378	1.447	1.307	0.972	1.076	1.073	0.958	0.960	0.962	0.778	0.517	0.518	1.438	1.507	1.359	2.375	1.01E-03
O60716	864	S	Catenin delta-1	CTNND1	0.990627	2.84E-35	165.4	S(0.115)QS(0.848)S(0.047)HS(0.991)YDDSTLPLIDR	2	-2.2819	17	1.477	0.803	1.009	0.946	0.985	0.78	0.972	1.076	1.073	0.958	0.960	0.962	1.520	0.746	0.940	0.987	1.026	0.811	0.881	6.26E-01
O60716	861	S	Catenin delta-1	CTNND1	0.847659	1.18E-25	145.25	S(0.115)QS(0.848)S(0.047)HS(0.991)YDDSTLPLIDR	2	-2.2819	3			0.652	0.811	1.538		0.972	1.076	1.073	0.958	0.960	0.962			0.608	0.847	1.602		2.015
O60716	349	S	Catenin delta-1	CTNND1	1	1.17E-13	154.85	GS(1)LAS(1)LDS(1)LR	2	0.5296	73	1.404	0.728	0.849	1.054	0.963	1.002	0.972	1.076	1.073	0.958	0.960	0.962	1.444	0.677	0.791	1.100	1.003	1.042	1.080	7.64E-01
O60716	320	S	Catenin delta-1	CTNND1	0.996501	3.41E-24	100.15	LRS(0.997)Y(0.003)EDMIGEEVPSDQYYWAPLAQHER	4	-0.38615	25	0.415	0.5	0.343	1.622	1.761	1.358	0.972	1.076	1.073	0.958	0.960	0.962	0.427	0.465	0.320	1.693	1.834	1.412	4.078	7.02E-04
O60716	899	S	Catenin delta-1	CTNND1	1	5.53E-10	115.09	S(1)LDNNYSTPNER	2	0.14191	1	0.687		0.761	1.235		1.317	0.972	1.076	1.073	0.958	0.960	0.962	0.707		0.709	1.289		1.369	1.877	4.11E-03
O60749	185	S	Sorting nexin-2	SNX2	0.999943	3.66E-03	52.372	RFS(1)DFLGLHSK	3	-0.12494	7	1.729	1.061		0.875	0.635	0.7	0.935	1.010	1.030	1.011	0.951	1.063	1.849	1.050		0.865	0.668	0.659	0.504	1.03E-01
O60749	101	T	Sorting nexin-2	SNX2	0.929489	4.39E-11	79.237	EPILSS(0.001)EPS(0.015)PAVT(0.929)PVT(0.048)PT(0.004)T(0.001)LIAPR	3	-2.8909	2		0.508	0.585	1.207	1.525	1.174	0.935	1.010	1.030	1.011	0.951	1.063		0.503	0.568	1.194	1.604	1.104	2.429	3.14E-02
O60762	3	S	Dolichol-phosphate mannosyltransferase subunit 1	DPM1	1	1.56E-03	107.57	AS(1)LEVSR	2	-0.0098647	4	0.832	0.714	0.579	1.233	1.47	1.172	0.990	0.967	1.030	0.990	0.992	1.031	0.840	0.738	0.562	1.245	1.482	1.137	1.805	1.16E-02
O60762	7	S	Dolichol-phosphate mannosyltransferase subunit 1	DPM1	0.843855	1.34E-10	141.37	ASLEVS(0.844)RS(0.156)PR	2	0.52826	3	1.183	1.012		0.996	0.968	0.841	0.990	0.967	1.030	0.990	0.992	1.031	1.195	1.047		1.006	0.976	0.816	0.832	1.40E-01
O60825	466	S	6-phosphofructo-2-kinase/fructose-2,6-bisphosphatase 2	PFKFB2	0.925098	3.16E-03	47.942	RNS(0.925)FT(0.075)PLSSSNTIR	3	0.29429	2	1.197	0.922	0.503	1.517	0.862		1.052	0.913	1.324	0.790	1.029	0.892	1.138	1.010	0.380	1.920	0.838		1.637	3.65E-01
O60825	483	S	6-phosphofructo-2-kinase/fructose-2,6-bisphosphatase 2	PFKFB2	0.951737	7.73E-02	40.058	NY(0.039)S(0.952)VGS(0.009)R	2	0.72216	1	0.728				1.188	1.083	1.052	0.913	1.324	0.790	1.029	0.892	0.692				1.155	1.214	1.711
O60825	493	S	6-phosphofructo-2-kinase/fructose-2,6-bisphosphatase 2	PFKFB2	1	5.27E-04	90.614	PLKPLS(1)PLR	3	0.2155	15	1.318	0.991	0.776	0.914	1.242	0.759	1.052	0.913	1.324	0.790	1.029	0.892	1.253	1.085	0.586	1.157	1.207	0.851	1.099	6.94E-01
O60832	453	S	H/ACA ribonucleoprotein complex subunit 4	DKC1	0.999941	6.36E-40	168.06	KRES(1)ES(1)ES(0.974)DET(0.026)PPAAPQLIK	2	-0.12002	68	1.284	0.819	1.017	0.978	1.044	0.858	1.079	1.075	1.090	0.924	0.922	0.911	1.190	0.762	0.933	1.058	1.132	0.942	1.086	5.77E-01
O60832	21	S	H/ACA ribonucleoprotein complex subunit 4	DKC1	1	2.36E-15	86.727	KS(1)LPEEDVAEIQHAEEFLIKPESK	4	0.41221	13	1.594	1.066	1.01	0.816		0.514	1.079	1.075	1.090	0.924	0.922	0.911	1.477	0.992	0.927	0.883		0.564	0.639	2.06E-01
O60832	455	S	H/ACA ribonucleoprotein complex subunit 4	DKC1	0.995539	6.75E-22	125.83	KRES(1)ES(0.999)ES(0.996)DET(0.006)PPAAPQLIK	3	-0.38249	49	1.275	1.12	1.029	0.835	0.995	0.745	1.079	1.075	1.090	0.924	0.922	0.911	1.182	1.042	0.944	0.904	1.079	0.818	0.884	3.02E-01
O60832	494	S	H/ACA ribonucleoprotein complex subunit 4	DKC1	0.933484	7.65E-19	132.66	AGLESGAEPGDGDS(0.933)DT(0.051)T(0.016)KK	2	0.6168	24	1.077	1.298	0.882	0.97	1.043	0.73	1.079	1.075	1.090	0.924	0.922	0.911	0.998	1.207	0.809	1.050	1.131	0.801	0.989	9.47E-01
O60832	451	S	H/ACA ribonucleoprotein complex subunit 4	DKC1	0.999994	6.36E-40	168.06	KRES(1)ES(1)ES(0.974)DET(0.026)PPAAPQLIK	2	-0.12002	105	1.309	1.094	1.067	0.869	0.907	0.753	1.079	1.075	1.090	0.924	0.922	0.911	1.213	1.018	0.979	0.940	0.984	0.827	0.857	1.51E-01
O60832	513	S	H/ACA ribonucleoprotein complex subunit 4	DKC1	1	3.10E-03	98.904	EVELVS(1)E	2	-0.12261	10	0.956	0.869	0.667	1.081	1.129	1.298	1.079	1.075	1.090	0.924	0.922	0.911	0.886	0.808	0.612	1.170	1.225	1.425	1.656	1.10E-02
O60841	190	S	Eukaryotic translation initiation factor 5B	EIF5B	0.999993	5.25E-46	178.56	INSSGESGDES(1)DEFLQSR	2	0.45435	27	1.012	0.916	1.208	0.915	1.03	0.918	0.966	0.983	0.956	1.046	1.066	0.984	1.048	0.932	1.264	0.875	0.966	0.933	0.855	1.96E-01
O60841	182	S	Eukaryotic translation initiation factor 5B	EIF5B	0.927458	2.65E-20	123.06	INS(0.927)S(0.073)GESGDES(1)DEFLQSR	2	-0.26982	6	1.232	0.848	1.031	1.046	0.843		0.966	0.983	0.956	1.046	1.066	0.984	1.275	0.863	1.078	1.000	0.791		0.835	3.81E-01
O60841	1168	S	Eukaryotic translation initiation factor 5B	EIF5B	1	1.28E-04	90.861	IEPIPGES(1)PK	2	0.52085	5	1.607	0.85	0.766	0.75	1.167	0.859	0.966	0.983	0.956	1.046	1.066	0.984	1.664	0.865	0.801	0.717	1.095	0.873	0.806	5.11E-01
O60841	107	S	Eukaryotic translation initiation factor 5B	EIF5B	0.998986	4.72E-09	104.82	KQS(0.999)FDDNDS(0.999)EELEDKDS(0.002)K	3	-0.64454	11	1.869	1.34	0.125	1.51	0.156		0.966	0.983	0.956	1.046	1.066	0.984	1.935	1.363	0.131	1.444	0.146		0.696	7.07E-01
O60841	137	S	Eukaryotic translation initiation factor 5B	EIF5B	0.938542	1.31E-07	82.01	VEMY(0.005)S(0.056)GS(0.939)DDDDDFNK	2	-0.8356	6	0.766	1.513		0.733	1.07	0.917	0.966	0.983	0.956	1.046	1.066	0.984	0.793	1.539		0.701	1.004	0.932	0.754	4.12E-01
O60841	164	S	Eukaryotic translation initiation factor 5B	EIF5B	1	2.13E-14	130.73	WDGS(1)EEDEDNSKK	2	-0.27005	11	0.913	0.688	0.773	1.638	1.067	0.92	0.966	0.983	0.956	1.046	1.066	0.984	0.945	0.700	0.809	1.566	1.001	0.935	1.427	1.75E-01
O60841	214	S	Eukaryotic translation initiation factor 5B	EIF5B	1	1.59E-26	140.51	NKPGPNIES(1)GNEDDDASFK	3	-0.20528	32	0.721	1.158	0.902	1.039	1.289	0.89	0.966	0.983	0.956	1.046	1.066	0.984	0.746	1.178	0.944	0.993	1.209	0.904	1.083	6.32E-01
O60841	113	S	Eukaryotic translation initiation factor 5B	EIF5B	0.999758	8.47E-26	150.69	QSFDDNDS(1)EELEDKDSK	2	-0.99532	14	1.031	0.791	1.049		1.129		0.966	0.983	0.956	1.046	1.066	0.984	1.067	0.805	1.097		1.059		1.070
O60885	1126	S	Bromodomain-containing protein 4	BRD4	0.978343	7.33E-06	74.147	S(0.004)EPFS(0.978)PS(0.018)LRPEPPK	2	0.30513	9	0.873	1.036	0.606	1.208		1.278	0.992	0.978	0.983	1.023	0.933	1.092	0.880	1.059	0.616	1.181		1.170	1.380	1.46E-01
O60885	1045	S	Bromodomain-containing protein 4	BRD4	1	3.52E-04	67.846	PQQVIQHHHS(1)PR	3	-0.33041	2	1.256	1.952	0.656	0.98	0.878	0.278	0.992	0.978	0.983	1.023	0.933	1.092	1.266	1.996	0.667	0.958	0.941	0.255	0.548	2.57E-01
O60885	1117	S	Bromodomain-containing protein 4	BRD4	1	6.01E-06	156.62	IHS(1)PIIR	2	0.2544	6	0.772	1.107	0.922	1.146	0.826	1.227	0.992	0.978	0.983	1.023	0.933	1.092	0.778	1.132	0.938	1.120	0.885	1.124	1.099	5.08E-01
O60885	601	S	Bromodomain-containing protein 4	BRD4	0.999999	2.35E-23	153.98	SKPPPTYES(1)EEEDK	3	-0.28533	44	1.019	1.025	0.729	1.054	0.976	1.197	0.992	0.978	0.983	1.023	0.933	1.092	1.027	1.048	0.742	1.030	1.046	1.096	1.126	3.05E-01
O60890	652	S	Oligophrenin-1	OPHN1	0.986755	3.68E-05	98.352	S(0.987)PS(0.013)RPILDGK	2	-0.025463	5	1.178	1.287	0.853	1.184	0.761	0.737			0.981		1.019				0.870		0.747		0.859
O60930	76	S	Ribonuclease H1	RNASEH1	0.993596	6.64E-40	154.69	S(0.006)AS(0.994)PEVSEGHENQHGQESEAK	3	0.3977	12	0.953	1.025	1.142	0.83	1.239	0.811		1.248	1.021	0.869		0.862		0.821	1.119	0.955		0.941	0.977	8.96E-01
O60934	432	S	Nibrin	NBN	0.995163	2.70E-14	165.72	IPNYQLS(0.995)PT(0.005)K	2	1.0859	9	1.471	0.648	0.665		1.254	0.962	1.013	0.902	0.995	1.036	1.072	0.981	1.452	0.718	0.668		1.170	0.981	1.136	7.26E-01
O60941	468	T	Dystrobrevin beta	DTNB	0.99638	4.80E-07	95.554	LEHEQAS(0.004)QPT(0.996)PEK	3	-0.46298	4	1.106	1.222	1.229	0.943	0.948	0.551		1.000						1.222
O75052	266	S	Carboxyl-terminal PDZ ligand of neuronal nitric oxide synthase protein	NOS1AP	0.923696	5.55E-06	95.205	VSHPQEPMLT(0.076)AS(0.924)PR	2	-1.3865	5	0.712		0.767	1.103	1.525	0.894
O75061	570	S	Putative tyrosine-protein phosphatase auxilin	DNAJC6	0.938573	1.23E-16	141.82	SATS(0.005)T(0.001)S(0.002)AS(0.939)PT(0.053)LR	2	-0.21059	4	1.437	0.939	0.801	0.927	0.936	0.96
O75084	568	S	Frizzled-7	FZD7	0.888011	1.61E-03	67.135	LSHS(0.081)S(0.888)KGET(0.031)AV	2	0.24488	4	0.79	1.3	1.344	0.826	1.049	0.691
O75113	288	S	NEDD4-binding protein 1	N4BP1	0.998307	2.80E-03	123.2	RFS(0.998)DS(0.002)EER	2	0.21216	8	1.365	0.799	0.9	1.105	1.025	0.807		1.331	0.830	0.905	0.659	1.276		0.600	1.084	1.221	1.555	0.632	1.349	5.08E-01
O75128	235	S	Protein cordon-bleu	COBL	0.99897	7.09E-85	247.67	KS(0.001)S(0.999)LGNDETDKEK	2	0.1663	12	1.435		1.056	0.82	0.505	1.184				1.038	0.962					0.790	0.525
O75132	624	S	Zinc finger BED domain-containing protein 4	ZBED4	0.993747	1.39E-41	172.37	TEVSETARPS(0.006)S(0.994)PDTR	2	1.2627	4	1.425	1.21		0.751	0.615
O75147	10	S	Obscurin-like protein 1	OBSL1	0.999997	4.34E-05	84.508	ASSGDQGS(1)PPCFLR	2	0.67655	4		1.469	1.225	0.87	1.277	0.159
O75151	625	S	Lysine-specific demethylase PHF2	PHF2	1	1.72E-10	140.53	LEKS(1)PLAGNK	3	0.63289	11	0.847	0.952	0.826	0.933	1.33	1.111	0.858	0.785	0.895	1.192	1.065	1.205	0.987	1.213	0.923	0.783	1.249	0.922	0.946	7.48E-01
O75151	905	S	Lysine-specific demethylase PHF2	PHF2	0.933086	3.03E-05	87.824	KGS(1)DDAPYS(0.933)PT(0.067)AR	2	0.99868	5	1.005	1.277	1.15	0.584	1.393	0.591	0.858	0.785	0.895	1.192	1.065	1.205	1.171	1.627	1.285	0.490	1.308	0.490	0.560	1.21E-01
O75151	899	S	Lysine-specific demethylase PHF2	PHF2	1	1.82E-21	150.59	KGS(1)DDAPYSPTAR	2	2.0697	10	1.179	1.143	0.997	1.117	0.998	0.566	0.858	0.785	0.895	1.192	1.065	1.205	1.374	1.456	1.114	0.937	0.937	0.470	0.594	4.62E-02
O75151	458	S	Lysine-specific demethylase PHF2	PHF2	0.941281	7.21E-12	96.052	AVRPEVNTVAS(0.941)S(0.059)DEVCDGDR	3	1.4723	6	0.928	0.991	0.728	0.893	1.209	1.251	0.858	0.785	0.895	1.192	1.065	1.205	1.082	1.262	0.813	0.749	1.135	1.038	0.926	6.77E-01
O75151	882	S	Lysine-specific demethylase PHF2	PHF2	0.999713	4.46E-10	97.57	DSDYVYPSLES(1)DEDNPIFK	3	-0.40299	7	1.095	0.857	0.865	1.03	0.97	1.183	0.858	0.785	0.895	1.192	1.065	1.205	1.276	1.092	0.966	0.864	0.911	0.982	0.827	1.16E-01
O75151	537	S	Lysine-specific demethylase PHF2	PHF2	0.782286	2.75E-13	115.88	ES(0.782)AS(0.204)PT(0.013)IPNLDLLEAHTK	2	0.33038	2		1.1			0.9		0.858	0.785	0.895	1.192	1.065	1.205		1.401			0.845		0.603
O75151	681	S	Lysine-specific demethylase PHF2	PHF2	0.99621	1.46E-03	59.345	DEYEY(0.004)VS(0.996)DDGELK	2	-0.037717	1		1.042	0.832	1.249		0.876	0.858	0.785	0.895	1.192	1.065	1.205		1.327	0.930	1.048		0.727	0.786	4.45E-01
O75152	132	S	Zinc finger CCCH domain-containing protein 11A	ZC3H11A	0.999957	6.74E-06	94.765	LSVQSNPS(1)PQLR	2	-1.9347	1			0.756		1.244		1.103	0.975	1.076	0.964	0.978	0.904			0.703		1.272		1.810
O75152	108	S	Zinc finger CCCH domain-containing protein 11A	ZC3H11A	0.999992	3.69E-07	102.69	TVLPTVPES(1)PEEEVK	2	1.2028	10	0.801	0.726	0.55	1.355	1.588	0.98	1.103	0.975	1.076	0.964	0.978	0.904	0.726	0.745	0.511	1.406	1.624	1.084	2.075	1.50E-02
O75152	758	S	Zinc finger CCCH domain-containing protein 11A	ZC3H11A	0.801737	8.45E-31	151.05	RLS(0.802)S(0.181)AS(0.014)T(0.003)GKPPLSVEDDFEK	3	0.83599	30	1.096	1	0.8	1.055	1.192	0.856	1.103	0.975	1.076	0.964	0.978	0.904	0.994	1.026	0.743	1.094	1.219	0.947	1.180	2.36E-01
O75152	761	S	Zinc finger CCCH domain-containing protein 11A	ZC3H11A	0.868231	4.55E-13	104.05	RLS(0.793)S(0.285)AS(0.868)T(0.054)GKPPLSVEDDFEK	3	0.38928	11	1.04		0.944		1.104	0.912	1.103	0.975	1.076	0.964	0.978	0.904	0.943		0.877		1.129	1.009	1.174	1.46E-01
O75153	664	S	Clustered mitochondria protein homolog	CLUH	0.999152	2.01E-23	124.57	SEDPPGQEAGS(0.999)EEEGS(0.001)SASGLAK	2	0.23508	15	0.753	1.257	0.752	1.015	1.457	0.766	1.010	1.000	0.998	0.996	1.035	0.961	0.746	1.257	0.754	1.019	1.408	0.797	1.170	5.60E-01
O75164	523	S	Lysine-specific demethylase 4A	KDM4A	0.779208	4.49E-08	108.75	DS(0.001)IS(0.19)S(0.779)DS(0.029)ET(0.001)SEPLSCR	2	-0.48838	4	1.319	0.861	0.784	0.791		1.245	0.972	0.859		1.004	1.083	1.082	1.357	1.002		0.788		1.151	0.822	4.94E-01
O75175	299	S	CCR4-NOT transcription complex subunit 3	CNOT3	0.999576	1.42E-14	134	STDSEVSQS(1)PAK	2	-0.23208	2		1.356	0.675			0.969	0.938	0.872	1.206	0.872	1.015	1.097		1.555	0.560			0.883	0.835
O75179	1709	S	Ankyrin repeat domain-containing protein 17	ANKRD17	0.999998	5.94E-03	83.309	LTVAS(1)PK	2	0.098325	3			0.819	0.88	0.876	1.425	0.915	1.041	0.883	1.028	0.979	1.154			0.928	0.856	0.895	1.235	1.073
O75179	2067	S	Ankyrin repeat domain-containing protein 17	ANKRD17	0.947114	4.56E-04	66.702	NS(1)PLDCGS(0.053)AS(0.947)PNK	2	-0.51237	1	1.024	0.824	0.618	0.931	1.63	0.972	0.915	1.041	0.883	1.028	0.979	1.154	1.119	0.792	0.700	0.906	1.665	0.842	1.307	4.13E-01
O75179	2059	S	Ankyrin repeat domain-containing protein 17	ANKRD17	0.999998	4.56E-04	66.702	NS(1)PLDCGS(0.053)AS(0.947)PNK	2	-0.51237	1	1.024	0.824	0.618	0.931	1.63	0.972	0.915	1.041	0.883	1.028	0.979	1.154	1.119	0.792	0.700	0.906	1.665	0.842	1.307	4.13E-01
O75190	277	S	DnaJ homolog subfamily B member 6	DNAJB6	1	5.91E-35	162.77	HAPHCLS(1)EEEGEQDRPR	3	-0.55964	44	0.955	1.457	1.211	1.049	0.052	1.276	0.991	0.885	0.999	1.117	0.953	1.055	0.964	1.646	1.212	0.939	0.055	1.209	0.576	2.50E-01
O75335	684	S	Liprin-alpha-4	PPFIA4	0.996086	3.68E-02	51.066	LLS(0.004)PVS(0.996)R	2	-0.30143	5		1.022	0.878	1.037	1.377	0.685
O75367	129	T	Core histone macro-H2A.1	H2AFY	1	2.53E-09	132.31	LEAIIT(1)PPPAK	2	0.030169	58	1.041	0.911	1.231	1.105	0.85	0.863	0.946	1.054	0.969	0.996	1.006	1.029	1.100	0.864	1.270	1.109	0.845	0.839	0.863	3.75E-01
O75369	2107	S	Filamin-B	FLNB	0.999922	2.38E-07	99.092	APS(1)VATVGSICDLNLK	2	-1.3012	12	1.295	1.057	0.896	0.993	0.788	0.97	0.979	0.963	0.971	1.002	1.021	1.065	1.323	1.098	0.923	0.991	0.772	0.911	0.800	1.67E-01
O75369	1505	S	Filamin-B	FLNB	0.999988	1.40E-03	60.968	YADEEIPRS(1)PFK	3	0.20852	4	0.802	1.15	0.907	1.176	0.965		0.979	0.963	0.971	1.002	1.021	1.065	0.819	1.194	0.934	1.174	0.945		1.078	6.76E-01
O75369	2478	S	Filamin-B	FLNB	0.999678	1.08E-63	188.73	LVS(1)PGSANETSSILVESVTR	2	-0.96317	33	0.555	0.305	0.418	1.42	1.604	1.697	0.979	0.963	0.971	1.002	1.021	1.065	0.567	0.317	0.430	1.417	1.571	1.593	3.486	2.80E-04
O75369	983	S	Filamin-B	FLNB	0.827079	1.93E-09	132.97	LDVT(0.003)ILS(0.827)PS(0.17)R	2	1.4555	1	1.122				0.878		0.979	0.963	0.971	1.002	1.021	1.065	1.146				0.860		0.750
O75376	2315	S	Nuclear receptor corepressor 1	NCOR1	0.997516	2.07E-07	92.287	REEGDPS(0.998)PHS(0.002)GGVCKPK	3	-0.82632	7	1.234	0.849	1.256	1.298	0.818	0.546	0.973	0.961	0.942	1.010	0.983	1.132	1.268	0.883	1.333	1.285	0.832	0.482	0.746	3.38E-01
O75376	1195	S	Nuclear receptor corepressor 1	NCOR1	0.804574	7.11E-14	160.38	MPIEDS(0.805)S(0.195)PEK	2	0.081437	12	0.794	0.962	0.962	1.04	1.241		0.973	0.961	0.942	1.010	0.983	1.132	0.816	1.001	1.021	1.030	1.262		1.211	1.97E-01
O75376	158	S	Nuclear receptor corepressor 1	NCOR1	0.828616	6.91E-19	108.3	HEAPS(0.165)S(0.829)PIS(0.006)GQPCGDDQNASPSK	3	0.00095304	12	0.737	0.819	1.42	1.024			0.973	0.961	0.942	1.010	0.983	1.132	0.757	0.852	1.507	1.014			0.976
O75376	2438	S	Nuclear receptor corepressor 1	NCOR1	0.993256	1.16E-05	66.448	EPAPLLSAQYETLS(0.007)DS(0.993)DD	2	-0.85131	1	0.81			1.19			0.973	0.961	0.942	1.010	0.983	1.132	0.832			1.178			1.415
O75376	999	S	Nuclear receptor corepressor 1	NCOR1	1	2.62E-19	102.09	S(1)PNREWEVLQPAPHQVITNLPEGVR	4	0.33731	15	1.038	0.787	0.955	1.184	0.902	1.133	0.973	0.961	0.942	1.010	0.983	1.132	1.067	0.819	1.014	1.172	0.918	1.001	1.066	5.81E-01
O75376	2151	S	Nuclear receptor corepressor 1	NCOR1	0.999726	2.60E-12	86.519	SHVSSEPYEPIS(1)PPQVPVVHEK	3	0.044844	15	0.815	0.831	1.056	1.365	0.951	0.982	0.973	0.961	0.942	1.010	0.983	1.132	0.838	0.865	1.121	1.351	0.967	0.867	1.129	5.23E-01
O75376	2120	S	Nuclear receptor corepressor 1	NCOR1	1	3.72E-07	148.1	VS(1)PENLVDK	2	0.24178	18	0.898	1.051	0.817	1.058	1.247	0.929	0.973	0.961	0.942	1.010	0.983	1.132	0.923	1.094	0.867	1.048	1.269	0.821	1.088	5.95E-01
O75376	2337	S	Nuclear receptor corepressor 1	NCOR1	0.999973	1.19E-10	114.55	S(1)PIPGQGYLGTER	2	2.0523	5	0.823	0.906	0.83	1.026	1.195	1.22	0.973	0.961	0.942	1.010	0.983	1.132	0.846	0.943	0.881	1.016	1.216	1.078	1.240	3.12E-02
O75376	172	S	Nuclear receptor corepressor 1	NCOR1	0.946613	1.31E-15	93.207	HEAPS(0.187)S(0.812)PIS(0.001)GQPCGDDQNAS(0.947)PS(0.053)K	3	-0.51186	20	0.962	0.821	0.868	1.026	0.868	1.455	0.973	0.961	0.942	1.010	0.983	1.132	0.989	0.854	0.921	1.016	0.883	1.285	1.152	3.24E-01
O75376	1977	S	Nuclear receptor corepressor 1	NCOR1	0.997301	1.16E-18	108.32	YETPSDAIEVIS(0.997)PAS(0.002)SPAPPQEK	2	0.49199	17	0.723	0.585	0.808	1.172	1.647	1.064	0.973	0.961	0.942	1.010	0.983	1.132	0.743	0.609	0.858	1.160	1.675	0.940	1.709	8.53E-02
O75376	224	S	Nuclear receptor corepressor 1	NCOR1	1	2.07E-10	67.396	QQQLEEEAAKPPEPEKPVS(1)PPPVEQK	3	-0.15076	18	0.963	1.053	0.921	0.985	1.033	1.046	0.973	0.961	0.942	1.010	0.983	1.132	0.990	1.096	0.978	0.975	1.051	0.924	0.963	5.13E-01
O75376	2102	S	Nuclear receptor corepressor 1	NCOR1	0.998316	1.31E-18	128.01	TSNRYS(0.998)PES(0.001)QAQSVHHQR	4	0.036043	17	0.69	1.236	1.204	0.712	1.352	0.807	0.973	0.961	0.942	1.010	0.983	1.132	0.709	1.286	1.278	0.705	1.375	0.713	0.853	6.14E-01
O75376	1367	T	Nuclear receptor corepressor 1	NCOR1	0.999993	4.61E-05	67.952	KT(1)PEVVQSTR	2	-0.12117	2	1.555		0.636	0.647	1.162		0.973	0.961	0.942	1.010	0.983	1.132	1.598		0.675	0.641	1.182		0.802	7.15E-01
O75376	1196	S	Nuclear receptor corepressor 1	NCOR1	0.820023	6.89E-08	120.6	MPIEDS(0.18)S(0.82)PEKGR	3	-1.0858	11	0.923	0.755	1.276	0.844	1.299	0.904	0.973	0.961	0.942	1.010	0.983	1.132	0.949	0.786	1.355	0.836	1.321	0.799	0.957	8.62E-01
O75376	2184	S	Nuclear receptor corepressor 1	NCOR1	0.994461	2.41E-40	193.32	S(0.994)PGS(0.006)ISYLPSFFTK	2	0.22436	12	0.906	0.87	0.755	1.007	1.105	1.356	0.973	0.961	0.942	1.010	0.983	1.132	0.931	0.905	0.801	0.997	1.124	1.198	1.258	3.27E-02
O75379	30	S	Vesicle-associated membrane protein 4	VAMP4	1	3.66E-42	173.37	NLLEDDS(1)DEEEDFFLR	3	-0.47036	14	1.029	0.975	0.797	0.858	1.476	0.864		1.001	1.128	0.871				0.974	0.707	0.985			1.172
O75381	232	S	Peroxisomal membrane protein PEX14	PEX14	0.948989	4.33E-04	79.089	QFPPS(0.949)PS(0.051)APK	2	0.74059	5	0.669	0.461		1.307	1.347	1.216	1.113	1.069	1.113	0.819	0.847	1.040	0.601	0.431		1.596	1.590	1.169	2.813	1.68E-02
O75381	275	S	Peroxisomal membrane protein PEX14	PEX14	0.930478	1.66E-22	90.338	SPSPSSPAAVNHHSSSDISPVSNEST(0.002)S(0.005)S(0.062)S(0.93)PGK	4	1.9339	7	1.277		1.13	0.859		0.735	1.113	1.069	1.113	0.819	0.847	1.040	1.147		1.015	1.049		0.707	0.812	3.83E-01
O75385	623	S	Serine/threonine-protein kinase ULK1	ULK1	0.867004	5.20E-04	70.197	NPLPPILGS(0.867)PT(0.133)K	2	0.55417	4	1.24	0.784	0.595	0.986	1.374	1.021
O75396	137	S	Vesicle-trafficking protein SEC22b	SEC22B	1	1.42E-40	195.23	NLGS(1)INTELQDVQR	2	0.067829	11	2.052	1.225	1.243	0.372	0.678	0.43	1.018	1.058	1.082	0.927	0.907	1.008	2.016	1.158	1.149	0.401	0.748	0.427	0.364	4.12E-02
O75398	176	S	Deformed epidermal autoregulatory factor 1 homolog	DEAF1	0.969445	4.71E-07	60.419	GPAAPLT(0.021)PGPQS(0.969)PPT(0.009)PLAPGQEK	3	-0.83881	6	1.311	1.088	0.903	0.918	1.042	0.738
O75400	787	S	Pre-mRNA-processing factor 40 homolog A	PRPF40A	0.984012	1.50E-03	58.98	EPAFEDIT(0.016)LES(0.984)ER	2	-1.0227	1	1.45	0.677	0.732	1.234	0.968	0.938	1.018	1.031	1.048	1.013	0.964	0.926	1.424	0.657	0.698	1.218	1.004	1.013	1.164	5.89E-01
O75400	935	S	Pre-mRNA-processing factor 40 homolog A	PRPF40A	0.754477	9.39E-35	159.14	DSGNWDT(0.066)S(0.042)GS(0.754)ELS(0.138)EGELEK	3	-0.21117	5	1.409	0.888	0.726		0.977		1.018	1.031	1.048	1.013	0.964	0.926	1.384	0.861	0.693		1.013		1.035
O75400	373	T	Pre-mRNA-processing factor 40 homolog A	PRPF40A	0.994006	5.11E-11	153.52	QET(0.006)VADFT(0.994)PK	2	-0.0061646	7			1.022	1.003	1.146	0.829	1.018	1.031	1.048	1.013	0.964	0.926			0.975	0.990	1.189	0.895	1.051
O75400	883	S	Pre-mRNA-processing factor 40 homolog A	PRPF40A	1	1.89E-91	216	HKS(1)DS(1)PES(1)DAEREK	3	-0.17986	85	0.838	0.283	1.224	0.909	1.799	0.947	1.018	1.031	1.048	1.013	0.964	0.926	0.823	0.274	1.168	0.897	1.866	1.023	1.671	2.74E-01
O75400	862	S	Pre-mRNA-processing factor 40 homolog A	PRPF40A	0.999995	1.15E-81	217.73	SASEHSSSAES(1)ERS(1)YKK	3	-0.53955	11	0.699	1.33	1.673	0.69	0.928	0.679	1.018	1.031	1.048	1.013	0.964	0.926	0.687	1.290	1.596	0.681	0.963	0.733	0.665	2.29E-01
O75400	933	S	Pre-mRNA-processing factor 40 homolog A	PRPF40A	0.985284	2.61E-35	166.27	DS(0.003)GNWDT(0.992)S(0.985)GS(0.019)ELSEGELEK	2	-0.45074	19	1.001	0.901	1.539		0.86	0.7	1.018	1.031	1.048	1.013	0.964	0.926	0.983	0.874	1.469		0.892	0.756	0.743	3.23E-01
O75400	888	S	Pre-mRNA-processing factor 40 homolog A	PRPF40A	1	1.04E-39	200.17	HKS(1)DS(1)PES(1)DAEREK	3	-0.17986	96	1.682	0.601	1.23	0.843	0.958	0.687	1.018	1.031	1.048	1.013	0.964	0.926	1.652	0.583	1.174	0.832	0.994	0.742	0.753	4.28E-01
O75400	932	T	Pre-mRNA-processing factor 40 homolog A	PRPF40A	0.992481	2.55E-58	191.22	DS(0.003)GNWDT(0.992)S(0.985)GS(0.019)ELSEGELEK	2	-0.45074	35	0.486	0.437	1.828	1.187	0.425	1.636	1.018	1.031	1.048	1.013	0.964	0.926	0.477	0.424	1.744	1.172	0.441	1.767	1.277	6.94E-01
O75400	938	S	Pre-mRNA-processing factor 40 homolog A	PRPF40A	0.999699	7.37E-63	186.63	DS(0.008)GNWDT(0.973)S(0.912)GS(0.107)ELS(1)EGELEK	2	-0.58758	25		0.4	0.412	0.623	1.659	1.906	1.018	1.031	1.048	1.013	0.964	0.926		0.388	0.393	0.615	1.721	2.058	3.750	1.52E-01
O75400	865	S	Pre-mRNA-processing factor 40 homolog A	PRPF40A	1	1.15E-81	217.73	SASEHSSSAES(1)ERS(1)YKK	3	-0.53955	13	0.701	1.51	1.768	0.693	0.816	0.512	1.018	1.031	1.048	1.013	0.964	0.926	0.689	1.465	1.687	0.684	0.846	0.553	0.543	1.36E-01
O75400	885	S	Pre-mRNA-processing factor 40 homolog A	PRPF40A	1	2.29E-76	208.3	HKS(1)DS(1)PES(1)DAEREK	3	-0.17986	36	1.786	0.72	0.801	1.207	0.685	0.801	1.018	1.031	1.048	1.013	0.964	0.926	1.754	0.698	0.764	1.192	0.711	0.865	0.860	7.06E-01
O75410	276	S	Transforming acidic coiled-coil-containing protein 1	TACC1	0.780886	3.58E-12	82.733	ASYHFSPEELDENT(0.219)S(0.781)PLLGDAR	3	0.33961	10	0.665	1.092	0.887	1.323	1.033		1.097	1.014	1.088	1.000	0.898	0.903	0.606	1.077	0.815	1.323	1.150		1.485	1.20E-01
O75427	25	S	Leucine-rich repeat and calponin homology domain-containing protein 4	LRCH4	0.839461	3.30E-22	92.135	AAAVAAPLAAGGEEAAAT(0.004)T(0.039)S(0.117)VPGS(0.839)PGLPGR	3	0.34697	10	1.005	0.987		0.909	1.057	1.042	0.955	1.024	0.886	1.208	0.967	0.961	1.052	0.964		0.752	1.093	1.084	0.969	8.46E-01
O75427	521	S	Leucine-rich repeat and calponin homology domain-containing protein 4	LRCH4	0.874861	1.47E-06	71.853	S(0.006)S(0.006)S(0.025)QS(0.025)GS(0.017)GPS(0.047)S(0.875)PDSVLRPR	2	0.49103	1	0.555		0.695		1.75		0.955	1.024	0.886	1.208	0.967	0.961	0.581		0.784		1.810		2.650
O75427	380	S	Leucine-rich repeat and calponin homology domain-containing protein 4	LRCH4	0.999849	4.79E-05	55.128	GTVEEQRPPELS(1)PGAGDR	3	0.87997	1	0.972	0.862	1.138	1.073	1.182	0.773	0.955	1.024	0.886	1.208	0.967	0.961	1.018	0.842	1.284	0.888	1.222	0.804	0.927	6.95E-01
O75448	873	S	Mediator of RNA polymerase II transcription subunit 24	MED24	0.956393	1.44E-46	182.15	LLSSNEDDANILS(0.036)S(0.956)PT(0.008)DR	2	2.0756	8	1.355	1.228	1.051	0.782	0.745	0.84	1.083	0.922	1.099	0.893	1.053	0.950	1.251	1.332	0.956	0.876	0.708	0.884	0.697	4.90E-02
O75448	862	S	Mediator of RNA polymerase II transcription subunit 24	MED24	0.830824	1.44E-26	151.42	LLS(0.831)S(0.169)NEDDANILSSPTDR	3	-0.17873	3			0.486	1.447		1.067	1.083	0.922	1.099	0.893	1.053	0.950			0.442	1.620		1.123	3.102
O75449	170	S	Katanin p60 ATPase-containing subunit A1	KATNA1	0.999966	1.39E-21	140.3	NKS(1)PAAVTEPETNK	2	0.93818	8	0.993	1.238	0.931	0.725	1.435	0.679	0.982	0.767	0.880	1.193	1.229	0.950	1.011	1.614	1.058	0.608	1.168	0.715	0.676	1.99E-01
O75475	116	S	PC4 and SFRS1-interacting protein	PSIP1	0.859986	3.15E-07	104.26	ET(0.134)S(0.86)VS(0.006)KEDTDHEEK	2	3.7056	4	1.528	0.774	0.857	1.13	0.711		0.962	1.034	1.111	0.831	0.999	1.063	1.588	0.749	0.771	1.360	0.712		1.000	9.99E-01
O75475	141	T	PC4 and SFRS1-interacting protein	PSIP1	0.845457	6.27E-03	95.483	AVDIT(0.155)T(0.845)PK	2	-0.41117	4	1.198	0.772	1.039	0.874	1.429	0.688	0.962	1.034	1.111	0.831	0.999	1.063	1.245	0.747	0.935	1.052	1.430	0.647	1.069	8.14E-01
O75475	122	T	PC4 and SFRS1-interacting protein	PSIP1	0.999992	3.64E-10	78.642	EDT(1)DHEEKAS(0.997)NEDVT(0.003)K	3	0.48789	5	0.841		1.111	1.155	1.017	0.876	0.962	1.034	1.111	0.831	0.999	1.063	0.874		1.000	1.390	1.018	0.824	1.150	5.68E-01
O75475	129	S	PC4 and SFRS1-interacting protein	PSIP1	1	8.47E-40	164.02	EDTDHEEKAS(1)NEDVTK	2	3.7762	21	1.445	0.89	1.199	0.992	1.371	0.104	0.962	1.034	1.111	0.831	0.999	1.063	1.502	0.861	1.079	1.194	1.372	0.098	0.774	5.88E-01
O75494	158	S	Serine/arginine-rich splicing factor 10	SRSF10	1	9.11E-05	104.49	S(1)HS(1)DNDRFK	2	0.30417	5	1.736	0.931	0.711	0.637	0.876	1.108	0.935	1.086	0.945	0.919	1.042	1.073	1.857	0.857	0.752	0.693	0.841	1.033	0.740	4.58E-01
O75494	131	S	Serine/arginine-rich splicing factor 10	SRSF10	1	6.65E-14	176.51	S(1)RS(1)FDYNYR	2	0.033471	36	1.174	1.216	0.993	0.846	0.93	0.842	0.935	1.086	0.945	0.919	1.042	1.073	1.256	1.120	1.051	0.921	0.893	0.785	0.758	1.94E-02
O75494	259	S	Serine/arginine-rich splicing factor 10	SRSF10	0.975551	4.32E-02	42.797	SWT(0.008)S(0.041)PKS(0.976)S(0.976)GH	2	0.43544	1	0.815	0.821	0.739	1.256	1.135	1.234	0.935	1.086	0.945	0.919	1.042	1.073	0.872	0.756	0.782	1.367	1.089	1.150	1.496	1.19E-02
O75494	260	S	Serine/arginine-rich splicing factor 10	SRSF10	0.975551	4.32E-02	42.797	SWT(0.008)S(0.041)PKS(0.976)S(0.976)GH	2	0.43544	1	0.815	0.821	0.739	1.256	1.135	1.234	0.935	1.086	0.945	0.919	1.042	1.073	0.872	0.756	0.782	1.367	1.089	1.150	1.496	1.19E-02
O75494	129	S	Serine/arginine-rich splicing factor 10	SRSF10	1	7.50E-06	106.14	S(1)RS(1)RS(1)FDYNYR	3	-0.070178	15	1.174	1.324	1.003	0.909	0.863	0.727	0.935	1.086	0.945	0.919	1.042	1.073	1.256	1.219	1.061	0.989	0.828	0.678	0.706	3.24E-02
O75494	160	S	Serine/arginine-rich splicing factor 10	SRSF10	1	9.11E-05	104.49	S(1)HS(1)DNDRFK	2	0.30417	5	1.736	0.931	0.711	0.637	0.876	1.108	0.935	1.086	0.945	0.919	1.042	1.073	1.857	0.857	0.752	0.693	0.841	1.033	0.740	4.58E-01
O75494	133	S	Serine/arginine-rich splicing factor 10	SRSF10	1	6.65E-14	176.51	S(1)RS(1)FDYNYR	2	0.037231	74	1.144	1.107	0.903	0.9	0.975	0.971	0.935	1.086	0.945	0.919	1.042	1.073	1.224	1.019	0.956	0.979	0.936	0.905	0.882	2.06E-01
O75530	34	S	Polycomb protein EED	EED	0.995313	1.51E-37	96.68	LSS(0.002)DENS(0.002)NPDLS(0.995)GDENDDAVS(0.001)IESGTNTERPDTPTNTPNAPGR	4	0.68721	5	0.906		1.092	1.029	1.084	0.889	1.043	0.923	1.051	0.947	0.911	1.125	0.869		1.039	1.087	1.190	0.790	1.072	7.10E-01
O75533	426	T	Splicing factor 3B subunit 1	SF3B1	0.999797	3.99E-04	66.152	VLPPPAGYVPIRT(1)PAR	3	0.77014	22	1.229	0.827	1.009	1.043	0.861	1.032	0.984	0.979	0.954	1.049	1.023	1.010	1.249	0.845	1.058	0.994	0.842	1.022	0.907	4.92E-01
O75533	261	T	Splicing factor 3B subunit 1	SF3B1	0.985915	2.98E-13	117.38	IWDPTPS(0.011)HT(0.986)PAGAAT(0.003)PGR	3	-0.64458	11	1.302	0.765	1.043	0.984	0.906		0.984	0.979	0.954	1.049	1.023	1.010	1.323	0.781	1.093	0.938	0.886		0.855	5.04E-01
O75533	328	T	Splicing factor 3B subunit 1	SF3B1	0.989749	7.90E-07	106.39	GGDSIGET(1)PT(0.99)PGAS(0.01)K	2	-2.1617	5		1.144	1.122	0.816	0.862	1.057	0.984	0.979	0.954	1.049	1.023	1.010		1.169	1.176	0.778	0.843	1.047	0.758	7.32E-02
O75533	488	S	Splicing factor 3B subunit 1	SF3B1	0.987291	1.18E-10	110.38	LLVDVDES(0.003)T(0.01)LS(0.987)PEEQKER	3	-0.71872	7	1.305	0.65		1.119	0.953	0.974	0.984	0.979	0.954	1.049	1.023	1.010	1.326	0.664		1.067	0.932	0.964	0.992	9.78E-01
O75533	326	T	Splicing factor 3B subunit 1	SF3B1	0.99983	7.90E-07	106.39	GGDSIGET(1)PT(0.99)PGAS(0.01)K	2	-2.1617	7	0.42	1.165	1.44	0.821	1.208	0.945	0.984	0.979	0.954	1.049	1.023	1.010	0.427	1.190	1.509	0.783	1.181	0.936	0.927	8.35E-01
O75533	273	T	Splicing factor 3B subunit 1	SF3B1	0.999974	1.74E-26	140.45	GDT(1)PGHATPGHGGATSSAR	2	-0.87319	14	0.593	2.146	0.709	0.55	0.499	1.503	0.984	0.979	0.954	1.049	1.023	1.010	0.603	2.192	0.743	0.524	0.488	1.488	0.707	5.98E-01
O75533	303	T	Splicing factor 3B subunit 1	SF3B1	0.999517	2.14E-05	71.859	DT(1)PGHGSGWAETPR	2	-0.035767	8	1.48	0.808	0.621	1.091			0.984	0.979	0.954	1.049	1.023	1.010	1.504	0.825	0.651	1.040			1.047
O75533	129	S	Splicing factor 3B subunit 1	SF3B1	1	5.66E-07	156.57	TMIIS(1)PER	2	-0.35851	25	1.075	1.091	0.939	0.89	1.072	0.933	0.984	0.979	0.954	1.049	1.023	1.010	1.092	1.114	0.984	0.848	1.048	0.924	0.884	1.55E-01
O75533	322	S	Splicing factor 3B subunit 1	SF3B1	0.999975	6.55E-05	80.316	GGDS(1)IGETPTPGASK	2	2.2384	5	0.948	0.803	0.733	1.033	1.483		0.984	0.979	0.954	1.049	1.023	1.010	0.963	0.820	0.768	0.985	1.450		1.431	1.48E-01
O75533	296	T	Splicing factor 3B subunit 1	SF3B1	0.998126	2.85E-02	66.023	WDET(0.998)PKT(0.002)ER	3	0.90348	2		0.599	0.667	1.337		1.397	0.984	0.979	0.954	1.049	1.023	1.010		0.612	0.699	1.275		1.383	2.027	1.05E-02
O75533	278	T	Splicing factor 3B subunit 1	SF3B1	0.995443	2.38E-04	51.052	GDT(1)PGHAT(0.995)PGHGGAT(0.002)S(0.002)S(0.002)AR	3	-1.6878	2		1.25				0.75	0.984	0.979	0.954	1.049	1.023	1.010		1.277				0.743	0.582
O75534	123	S	Cold shock domain-containing protein E1	CSDE1	0.98614	7.03E-07	84.975	SPAAPGQS(0.986)PT(0.012)GS(0.001)VCYER	2	0.32136	1	0.842	1.186		0.708	1.35	0.914	0.980	0.983	0.951	1.036	1.006	1.044	0.859	1.207		0.683	1.342	0.875	0.936	8.31E-01
O75534	116	S	Cold shock domain-containing protein E1	CSDE1	0.999993	8.58E-07	82.406	S(1)PAAPGQSPTGSVCYER	2	-2.6236	4	1.147	0.978		0.876			0.980	0.983	0.951	1.036	1.006	1.044	1.170	0.995		0.846			0.781
O75569	18	S	Interferon-inducible double-stranded RNA-dependent protein kinase activator A	PRKRA	0.980483	1.84E-04	87.719	EDS(0.98)GT(0.019)FS(0.001)LGK	2	-2.4521	7	0.84	0.935	0.896	1.032	1.382	0.915	0.933	1.035	0.873	1.011	1.093	1.055	0.900	0.903	1.026	1.021	1.264	0.867	1.114	4.31E-01
O75592	2751	S	E3 ubiquitin-protein ligase MYCBP2	MYCBP2	0.999282	7.89E-15	128.74	S(0.001)LS(0.999)PNHNTLQTLK	2	0.16402	12	0.816	1.236	0.8	1.255	1.028	0.866
O75643	457	S	U5 small nuclear ribonucleoprotein 200 kDa helicase	SNRNP200	1	2.23E-03	53.255	PFGS(1)EEQLLPVEK	2	1.4397	1	1.153	1.078		0.87		0.899	0.953	0.982	0.978	1.005	1.017	1.064	1.210	1.098		0.866		0.845	0.741	3.46E-02
O75643	225	S	U5 small nuclear ribonucleoprotein 200 kDa helicase	SNRNP200	1	3.22E-42	174.59	EEAS(1)DDDMEGDEAVVR	2	-0.22117	77	1.329	0.775	0.829	1.303	0.713	1.049	0.953	0.982	0.978	1.005	1.017	1.064	1.395	0.789	0.848	1.297	0.701	0.986	0.984	9.54E-01
O75665	774	S	Oral-facial-digital syndrome 1 protein	OFD1	0.995831	1.02E-04	92.295	MPLPS(0.996)PT(0.003)ES(0.002)R	2	-0.33394	4			0.847	0.975	1.071	1.108
O75665	789	S	Oral-facial-digital syndrome 1 protein	OFD1	0.863035	2.73E-07	100.58	HSLSIPPVS(0.137)S(0.863)PPEQK	3	1.085	18	0.933	0.807		1.06	1.067	1.133
O75665	669	S	Oral-facial-digital syndrome 1 protein	OFD1	0.999943	1.38E-16	140.27	S(1)PPSLHLLEAFK	2	0.32308	18	2.178	1.061	0.835	0.615	0.748	0.561
O75683	138	S	Surfeit locus protein 6	SURF6	1	9.73E-06	130.56	ELS(1)PAALEK	1	1.9229	17	1.233	1.096	0.868	0.853	1.043	0.907	1.087	1.132	0.978	0.849	1.028	0.926	1.134	0.968	0.888	1.005	1.015	0.979	1.003	9.70E-01
O75691	2064	T	Small subunit processome component 20 homolog	UTP20	0.999997	1.31E-04	72.793	LPPQSCLLLPPT(1)PVR	3	0.16583	11	1.322	1.404	1.036	0.703	0.765	0.769	1.052	1.033	1.089	0.936	0.992	0.898	1.257	1.359	0.951	0.751	0.771	0.856	0.667	3.53E-02
O75691	1741	T	Small subunit processome component 20 homolog	UTP20	0.999141	5.13E-10	76.899	SLS(0.001)DNGQPGT(0.999)PDPADSGGTSAK	2	-1.9725	13	1.044	0.619	0.966	1.292	0.964	1.115	1.052	1.033	1.089	0.936	0.992	0.898	0.992	0.599	0.887	1.380	0.972	1.242	1.450	9.13E-02
O75691	2601	S	Small subunit processome component 20 homolog	UTP20	1	1.21E-81	219.01	AES(1)DGEEKEEVKEELGR	2	1.7123	41	1.327	0.738	0.955	0.934	1.114	0.932	1.052	1.033	1.089	0.936	0.992	0.898	1.261	0.714	0.877	0.998	1.123	1.038	1.107	5.73E-01
O75694	992	S	Nuclear pore complex protein Nup155	NUP155	0.887703	7.62E-04	76.326	AAPQS(0.888)PS(0.112)VPK	2	-0.20724	12	1.131	0.825	0.922	1.176	0.892	1.053	1.066	1.048	1.060	0.961	0.940	0.925	1.061	0.787	0.870	1.224	0.949	1.138	1.218	1.60E-01
O75712	268	T	Gap junction beta-3 protein	GJB3	0.997953	3.41E-02	53.351	LQAS(0.002)APNLT(0.998)PI	2	-1.2913	1		0.472	0.539	1.502	1.411	1.076
O75717	958	S	WD repeat and HMG-box DNA-binding protein 1	WDHD1	0.99961	7.21E-05	71.251	TTNNEKS(1)PIIKPLIPK	3	-0.013409	5	1.154	1.041	1.203	0.786		0.816	0.939	0.981	0.928	1.027	1.063	1.062	1.229	1.061	1.296	0.765		0.768	0.641	1.77E-02
O75822	109	T	Eukaryotic translation initiation factor 3 subunit J	EIF3J	1	4.46E-09	126.09	VLT(1)PEEQLADK	2	0.27561	9	0.655	0.579	0.513	1.37	1.477	1.405	0.820	0.849	0.884	1.099	1.110	1.239	0.799	0.682	0.580	1.247	1.331	1.134	1.801	2.94E-03
O75822	11	S	Eukaryotic translation initiation factor 3 subunit J	EIF3J	0.822543	7.83E-24	118.32	AAAAAAAGDS(0.823)DS(0.177)WDADAFSVEDPVR	3	0.19945	63	0.693	0.646	0.641	1.411	1.338	1.271	0.820	0.849	0.884	1.099	1.110	1.239	0.845	0.761	0.725	1.284	1.205	1.026	1.508	9.42E-03
O75909	324	S	Cyclin-K	CCNK	0.999999	3.06E-07	118.76	KPS(1)PQPSSPR	2	0.62021	10	1.363	0.456	0.752	1.161	1.061	1.206	0.950	0.861	0.911	1.167	1.079	1.032	1.435	0.530	0.825	0.995	0.983	1.169	1.128	6.86E-01
O75909	329	S	Cyclin-K	CCNK	0.866098	3.51E-05	105.41	KPSPQPS(0.134)S(0.866)PR	2	-1.4749	4	0.726		0.955	0.765		1.554	0.950	0.861	0.911	1.167	1.079	1.032	0.764		1.048	0.656		1.506	1.192	7.35E-01
O75909	340	S	Cyclin-K	CCNK	1	5.31E-11	139.74	AVVVS(1)PKEENK	2	-0.19932	21	0.616	1.074	1.086	0.887	1.545	0.793	0.950	0.861	0.911	1.167	1.079	1.032	0.648	1.247	1.192	0.760	1.432	0.768	0.959	8.92E-01
O75925	503	S	E3 SUMO-protein ligase PIAS1	PIAS1	0.975553	4.94E-05	80.414	GILS(0.003)LPHQAS(0.976)PVS(0.022)R	3	0.050546	9	1.092	0.963	1.064	1.184	0.853	0.844
O75925	488	S	E3 SUMO-protein ligase PIAS1	PIAS1	0.989754	3.00E-04	69.485	TCPSLS(0.001)PT(0.01)S(0.99)PLNNK	2	1.552	4	0.951	1.036	1.131		0.764	1.119
O75976	1368	T	Carboxypeptidase D	CPD	0.999991	1.91E-24	129.27	SLLSHEFQDET(1)DT(1)EEETLYSSK	3	-0.26403	20	1.131	1.293	0.986	0.865	0.833	0.892	1.122	1.088	1.179	0.903	0.859	0.850	1.008	1.188	0.836	0.958	0.970	1.049	0.982	8.69E-01
O75976	1370	T	Carboxypeptidase D	CPD	0.999948	2.51E-41	159.06	SLLSHEFQDETDT(1)EEETLYSSK	3	-0.20768	41	1.295	1.335	1.188	0.919	0.393	0.871	1.122	1.088	1.179	0.903	0.859	0.850	1.154	1.227	1.008	1.018	0.458	1.025	0.738	2.10E-01
O76021	427	S	Ribosomal L1 domain-containing protein 1	RSL1D1	0.999995	1.09E-71	239.33	AAESETPGKS(1)PEK	2	-0.020402	19	2.003	0.823	0.795	0.95	0.67	0.759	1.043	1.108	1.059	0.930	0.926	0.934	1.920	0.743	0.751	1.022	0.724	0.813	0.749	5.16E-01
O76021	443	S	Ribosomal L1 domain-containing protein 1	RSL1D1	0.999126	9.23E-05	148.76	EKS(0.999)PS(0.001)LGK	2	0.20938	16	0.83	0.786	2.517	0.395	1.126	0.345	1.043	1.108	1.059	0.930	0.926	0.934	0.796	0.709	2.377	0.425	1.216	0.369	0.518	3.62E-01
O76021	361	S	Ribosomal L1 domain-containing protein 1	RSL1D1	0.973021	1.69E-18	129.87	AT(0.027)NES(0.973)EDEIPQLVPIGK	3	-0.15517	45	1.061	0.94	0.898	1.178	0.944	0.979	1.043	1.108	1.059	0.930	0.926	0.934	1.017	0.848	0.848	1.267	1.019	1.048	1.229	9.81E-02
O76050	469	S	E3 ubiquitin-protein ligase NEURL1	NEURL1	0.812697	2.83E-10	76.55	GIPSLPCSPAS(0.001)T(0.001)PT(0.151)S(0.813)PS(0.033)ALGS(0.001)R	3	-0.76603	4		0.844		0.878	1.008	1.271			1.000
O76094	621	S	Signal recognition particle subunit SRP72	SRP72	0.983933	3.13E-19	99.732	T(0.001)VS(0.015)S(0.984)PPTSPR	2	1.531	58	0.543	0.38	0.55	1.655	1.342	1.531	0.987	0.962	1.008	1.018	1.001	1.024	0.550	0.395	0.546	1.626	1.341	1.495	2.993	5.16E-04
O76094	620	S	Signal recognition particle subunit SRP72	SRP72	0.852032	4.58E-13	77.124	T(0.097)VS(0.852)S(0.05)PPTSPR	2	0.29506	18	0.899			0.96	1.39	0.751	0.987	0.962	1.008	1.018	1.001	1.024	0.911			0.943	1.389	0.733	1.122
O94762	727	S	ATP-dependent DNA helicase Q5	RECQL5	0.999327	2.30E-06	72.99	GEVPGGS(0.001)AHYGGPS(0.999)PEKK	3	0.42072	15	1.25	0.824	1.144	1.218	0.622	0.942	1.003	0.900	1.092	0.885	1.068	1.052	1.246	0.916	1.048	1.376	0.582	0.895	0.889	6.60E-01
O94762	488	S	ATP-dependent DNA helicase Q5	RECQL5	0.999813	4.17E-14	120.23	YDEGS(1)GGS(1)GDEGRDEAHK	2	0.1498	4	1.452			0.907		0.64	1.003	0.900	1.092	0.885	1.068	1.052	1.448			1.025		0.608	0.564
O94762	815	S	ATP-dependent DNA helicase Q5	RECQL5	0.999898	1.16E-15	93.166	YTGEEDGAGGHS(1)PAPPQTEECLR	3	0.040257	9	0.972	1.184	0.869	0.973	1.253	0.749	1.003	0.900	1.092	0.885	1.068	1.052	0.969	1.316	0.796	1.099	1.173	0.712	0.969	8.86E-01
O94762	491	S	ATP-dependent DNA helicase Q5	RECQL5	0.999813	1.63E-08	93.583	YDEGS(1)GGS(1)GDEGRDEAHK	2	0.1498	5	0.988			0.769	1.52	0.723	1.003	0.900	1.092	0.885	1.068	1.052	0.985			0.869	1.423	0.687	1.008
O94763	66	S	Unconventional prefoldin RPB5 interactor 1	URI1	0.99909	7.91E-04	86.243	ERLS(0.999)T(0.001)LPDK	2	0.038813	11	1.198	0.83	0.965	1.165	0.866	0.975						1.000						0.975
O94782	67	S	Ubiquitin carboxyl-terminal hydrolase 1	USP1	0.981744	5.52E-13	99.097	ASEIDQVVPAAQS(0.018)S(0.982)PINCEK	3	1.2007	7	0.788	0.96	1.118	0.952	0.855	1.327
O94804	185	T	Serine/threonine-protein kinase 10	STK10	1	3.32E-05	160.16	NLKT(1)LQK	2	-0.15975	8	1.28	1.001	0.992	0.779	1.17	0.778	0.948	1.038	1.074	0.930	0.987	1.023	1.350	0.964	0.924	0.838	1.185	0.761	0.860	4.67E-01
O94804	20	S	Serine/threonine-protein kinase 10	STK10	0.999872	9.28E-04	78.136	S(1)REYEHVR	3	0.087891	3	1.587	1.24	0.953	0.823	0.397		0.948	1.038	1.074	0.930	0.987	1.023	1.674	1.195	0.887	0.885	0.402		0.514	1.77E-01
O94804	438	S	Serine/threonine-protein kinase 10	STK10	1	1.93E-62	183.74	QVAEQGGDLS(1)PAANR	2	-0.7497	15	0.836	1.228	0.786			1.151	0.948	1.038	1.074	0.930	0.987	1.023	0.882	1.183	0.732			1.125	1.207
O94804	454	S	Serine/threonine-protein kinase 10	STK10	0.777806	6.90E-07	82.885	AS(0.013)QS(0.013)RPNS(0.778)S(0.196)ALETLGGEK	2	-1.2648	2	0.786				1.214		0.948	1.038	1.074	0.930	0.987	1.023	0.829				1.230		1.483
O94806	213	S	Serine/threonine-protein kinase D3	PRKD3	0.915415	1.50E-04	62.325	RLS(0.915)NVS(0.085)LPGPGLSVPR	3	0.47889	3	1.543	0.904	0.659		0.894
O94826	434	S	Mitochondrial import receptor subunit TOM70	TOMM70	1	1.77E-02	47.217	LRPES(1)ALAQAQK	2	2.4238	3	1.082	1.496	1.127	0.913	0.864	0.518	0.994	1.012	1.007	0.970	0.970	1.048	1.089	1.478	1.119	0.941	0.891	0.494	0.631	7.43E-02
O94826	91	S	Mitochondrial import receptor subunit TOM70	TOMM70	0.999968	2.87E-46	162.44	AS(1)PAPGSGHPEGPGAHLDMNSLDR	3	-0.056837	114	1.03	1.25	1.073	0.799	1.176	0.673	0.994	1.012	1.007	0.970	0.970	1.048	1.036	1.235	1.066	0.824	1.212	0.642	0.803	2.88E-01
O94842	182	S	TOX high mobility group box family member 4	TOX4	0.774296	1.59E-13	109.41	LS(0.113)T(0.851)T(0.032)PS(0.004)PT(0.01)S(0.216)S(0.774)LHEDGVEDFRR	3	-0.47834	11	1.23	0.843				0.926	1.084	0.952	1.018	1.052	0.921	0.973	1.135	0.886				0.952	0.942
O94842	178	S	TOX high mobility group box family member 4	TOX4	0.9291	6.20E-13	104.81	LS(0.028)T(0.444)T(0.558)PS(0.929)PT(0.109)S(0.237)S(0.695)LHEDGVEDFRR	3	1.2771	6	1.731	0.657	0.836		0.45	1.326	1.084	0.952	1.018	1.052	0.921	0.973	1.597	0.690	0.821		0.489	1.363	0.893	8.36E-01
O94842	175	T	TOX high mobility group box family member 4	TOX4	0.953545	2.34E-17	116.74	LS(0.033)T(0.954)T(0.006)PS(0.007)PTSSLHEDGVEDFRR	3	0.55785	25	0.575	1.102	1.108	0.961	1.049	1.205	1.084	0.952	1.018	1.052	0.921	0.973	0.530	1.158	1.088	0.913	1.139	1.238	1.185	4.80E-01
O94842	176	T	TOX high mobility group box family member 4	TOX4	0.820304	4.62E-07	66.152	LS(0.281)T(0.82)T(0.82)PS(0.07)PT(0.006)S(0.002)S(0.001)LHEDGVEDFRR	3	0.35413	7	1.507	0.958	0.755	0.626		1.154	1.084	0.952	1.018	1.052	0.921	0.973	1.390	1.006	0.742	0.595		1.186	0.851	6.68E-01
O94875	277	T	Sorbin and SH3 domain-containing protein 2	SORBS2	0.766282	9.96E-05	64.275	T(0.766)S(0.233)PGRVDLPGSSTTLTK	3	-0.61914	3	0.823	0.982	1.154	1.041
O94876	382	S	Transmembrane and coiled-coil domains protein 1	TMCC1	1	7.37E-12	149.69	FGS(1)ADNIPNLK	2	-0.041173	6	1.171	0.969	0.923	1.129	0.84	0.968
O94880	298	S	PHD finger protein 14	PHF14	0.994915	3.25E-02	41.051	S(0.995)NEDS(0.005)LILEK	2	2.1519	1		0.966			0.953	1.081			1.000
O94880	287	T	PHD finger protein 14	PHF14	0.994737	2.24E-04	62.717	NS(0.003)ADDEELT(0.995)NDS(0.9)LT(0.094)LS(0.009)QSK	2	0.31447	3	1.183	0.81	1.201		0.647	1.16			1.000						1.201
O94880	835	S	PHD finger protein 14	PHF14	1	4.56E-14	127.36	S(1)FVPEEEKHEER	3	0.77781	14	1.336	0.679	0.955	1.219	1.009	0.802			1.000						0.955
O94880	290	S	PHD finger protein 14	PHF14	0.916084	2.24E-04	62.717	NS(0.002)ADDEELT(0.994)NDS(0.916)LT(0.078)LS(0.01)QS(0.001)K	2	0.40175	3	1.183	0.81	1.201		0.647	1.16			1.000						1.201
O94885	90	S	SAM and SH3 domain-containing protein 1	SASH1	0.999994	7.15E-09	70.67	RVS(1)QDLEVEKPDASPTSLQLR	3	-0.07745	2	1.334	0.799	1.126	1.105	0.637
O94885	813	S	SAM and SH3 domain-containing protein 1	SASH1	1	1.00E-03	93.374	S(1)LPVSICR	2	0.064581	2	0.995	1.115	0.997	1.055		0.838
O94901	48	S	SUN domain-containing protein 1	SUN1	1	1.82E-02	51.359	LDPVFDS(1)PR	2	-0.30307	2	1.063	1.217	0.766	0.912	0.967	1.075	1.088	1.068	1.088	0.876	0.951	0.928	0.977	1.140	0.704	1.041	1.017	1.158	1.140	3.82E-01
O94913	1530	T	Pre-mRNA cleavage complex 2 protein Pcf11	PCF11	0.999759	3.62E-07	88.239	IDT(1)PPACTEESIATPSEIK	2	-0.08894	7	0.696	0.907	0.835	1.208	1.355		1.144	1.138	1.090	0.727	0.967	0.934	0.608	0.797	0.766	1.662	1.401		2.116	7.17E-03
O94913	487	S	Pre-mRNA cleavage complex 2 protein Pcf11	PCF11	1	2.84E-04	87.388	S(1)RS(1)PIIHS(1)PK	2	-1.7044	3		2.519	0.153	0.491	0.116	1.722	1.144	1.138	1.090	0.727	0.967	0.934		2.214	0.140	0.675	0.120	1.844	0.747	7.88E-01
O94913	494	S	Pre-mRNA cleavage complex 2 protein Pcf11	PCF11	1	2.01E-07	164.6	S(1)RS(1)PIIHS(1)PK	2	-1.7044	20	0.742	1.131	1.118	1.066	1.152	0.791	1.144	1.138	1.090	0.727	0.967	0.934	0.649	0.994	1.026	1.466	1.191	0.847	1.313	2.66E-01
O94913	489	S	Pre-mRNA cleavage complex 2 protein Pcf11	PCF11	1	2.84E-04	87.388	S(1)RS(1)PIIHS(1)PK	2	-1.7044	17	0.906	1.134	1.064	0.917	0.908	1.071	1.144	1.138	1.090	0.727	0.967	0.934	0.792	0.996	0.976	1.261	0.939	1.147	1.211	1.65E-01
O94913	777	S	Pre-mRNA cleavage complex 2 protein Pcf11	PCF11	1	2.89E-05	84.508	MIFEGPNKLS(1)PR	3	0.009618	8	0.994	1.054	0.798	0.692	1.355	1.108	1.144	1.138	1.090	0.727	0.967	0.934	0.869	0.926	0.732	0.952	1.401	1.186	1.401	7.63E-02
O94913	705	S	Pre-mRNA cleavage complex 2 protein Pcf11	PCF11	1	1.91E-04	72.433	EEQRS(1)PFNDRFPLK	3	-0.26386	3		1.09	0.972		1.271	0.666	1.144	1.138	1.090	0.727	0.967	0.934		0.958	0.892		1.314	0.713	1.096	7.96E-01
O94927	85	T	HAUS augmin-like complex subunit 5	HAUS5	1	1.50E-03	83.226	KLELEAAVT(1)R	2	0.40927	4	1.597	0.484	1.137	0.967	0.944	0.871
O94964	1017	S	Protein SOGA1	SOGA1	0.999731	4.44E-05	107.06	VYYS(1)PPVAR	2	-0.031279	12	1.103	0.772	0.79	1.132	1.207	0.997	1.043	0.829	0.868	1.156	0.987	1.117	1.058	0.931	0.910	0.979	1.223	0.893	1.068	5.82E-01
O94964	1303	S	Protein SOGA1	SOGA1	0.999555	4.55E-10	112.67	APS(1)PTSSAGEEGTK	2	-1.4729	1	1.085			0.915			1.043	0.829	0.868	1.156	0.987	1.117	1.040			0.792			0.761
O94972	454	S	E3 ubiquitin-protein ligase TRIM37	TRIM37	0.897052	3.78E-04	44.054	DLS(0.897)PPDNHLS(0.103)PQNDDALETR	3	-1.0313	1	1.234	0.796	1.185			0.785
O94979	1163	S	Protein transport protein Sec31A	SEC31A	0.948263	3.78E-09	98.175	EQT(0.047)LS(0.948)PT(0.005)ITSGLHNIAR	3	-0.51292	5	1.204	1.089	0.928	0.702	1.077		0.952	1.003	0.970	0.940	1.057	1.078	1.265	1.086	0.957	0.747	1.019		0.801	2.48E-01
O94979	527	S	Protein transport protein Sec31A	SEC31A	0.795239	9.78E-18	83.992	DSDQVAQS(0.795)DGEES(0.205)PAAEEQLLGEHIK	3	1.9599	5			0.943	1.183		0.874	0.952	1.003	0.970	0.940	1.057	1.078			0.972	1.259		0.811	1.064
O94979	799	S	Protein transport protein Sec31A	SEC31A	1	6.03E-22	150.27	AQGEPVAGHES(1)PK	3	-1.6596	20	0.772	0.998	1.794	0.954	0.971	0.511	0.952	1.003	0.970	0.940	1.057	1.078	0.811	0.995	1.849	1.015	0.919	0.474	0.659	3.13E-01
O94986	1461	S	Centrosomal protein of 152 kDa	CEP152	1	2.49E-09	95.996	NVS(1)PEFVPCEGEGGFGLHK	3	-0.41499	5	1.26	0.819	1.174	0.909	1.002	0.836
O94986	1241	T	Centrosomal protein of 152 kDa	CEP152	0.997448	5.86E-04	75.143	LEELQT(0.003)LCKT(0.997)PPR	3	2.6422	2		1.117	1.379			0.503
O95071	1549	S	E3 ubiquitin-protein ligase UBR5	UBR5	0.99999	1.89E-05	134.75	RIS(1)QSQPVR	2	-0.01396	15	0.82	0.982	1.065	1.036	1.397	0.7	0.828	0.948	1.047	1.005	1.040	1.131	0.990	1.036	1.017	1.031	1.343	0.619	0.983	9.40E-01
O95104	154	S	Splicing factor, arginine/serine-rich 15	SCAF4	0.998897	3.69E-12	62.357	IEIIQPLLDMAAGTSNAAPVAENVT(0.001)NNEGS(0.999)PPPPVK	3	0.15508	16	0.777	0.94	0.874	1.399	1.01		0.854	0.886	0.936	1.046	1.091	1.187	0.910	1.061	0.934	1.337	0.926		1.169	3.95E-01
O95155	31	S	Ubiquitin conjugation factor E4 B	UBE4B	0.896216	4.67E-08	95.195	LAGGQTSQPT(0.003)T(0.004)PLT(0.097)S(0.896)PQR	2	-0.21094	7	0.737	0.687		1.05	1.208	1.318	0.774	0.842	1.231	1.107	1.219	0.827	0.952	0.816		0.949	0.991	1.594	1.332	3.62E-01
O95171	437	T	Sciellin	SCEL	0.994147	1.58E-05	67.827	STEGGQSLDS(0.006)LIKVT(0.994)PER	3	0.05938	2	1.394	0.802	0.825	0.95	1.158	0.87	0.943	0.898	1.028	1.019	1.068	1.045	1.478	0.893	0.803	0.932	1.084	0.833	0.898	6.54E-01
O95171	312	S	Sciellin	SCEL	0.998791	9.68E-04	73.881	GIQS(0.001)LGS(0.999)PIK	2	0.35085	5	1.133	0.689		0.929	1.132	1.117	0.943	0.898	1.028	1.019	1.068	1.045	1.201	0.767		0.912	1.060	1.069	1.030	8.78E-01
O95171	91	S	Sciellin	SCEL	0.998287	1.61E-05	120.32	YS(0.001)S(0.998)DDTLDR	2	0.063452	9	0.794	0.605	0.602	1.298	1.323	1.377	0.943	0.898	1.028	1.019	1.068	1.045	0.842	0.674	0.586	1.274	1.239	1.318	1.823	1.84E-03
O95171	10	S	Sciellin	SCEL	0.999896	6.18E-10	120.21	KMS(1)PTGNEMK	2	-0.056939	3	0.799	1.182		0.892		1.127	0.943	0.898	1.028	1.019	1.068	1.045	0.847	1.316		0.875		1.078	0.903	7.21E-01
O95197	30	S	Reticulon-3	RTN3	0.99665	8.23E-28	95.221	AEPSAATQSHSISSSSFGAEPS(0.003)APGGGGS(0.997)PGACPALGTK	3	0.01044	18	1.202	0.86	1.034	0.897	1.043	0.965	1.003	0.936	1.037	0.920	0.854	1.249	1.198	0.919	0.997	0.975	1.221	0.773	0.953	7.69E-01
O95208	173	S	Epsin-2	EPN2	0.973961	7.65E-10	108.18	GS(0.026)S(0.974)QPNLSTSHSEQEYGK	2	0.13612	20	1.049	1.129	1.143	0.981	1.175	0.523	1.095	1.060	1.035	0.900	0.955	0.956	0.958	1.065	1.104	1.090	1.230	0.547	0.917	7.05E-01
O95208	508	T	Epsin-2	EPN2	0.968854	1.88E-24	129.26	KT(0.969)PES(0.031)FLGPNAALVNLDSLVTR	3	-0.02299	12		0.362	0.537	1.248	1.198	1.656	1.095	1.060	1.035	0.900	0.955	0.956		0.342	0.519	1.387	1.254	1.732	3.389	1.34E-02
O95218	120	S	Zinc finger Ran-binding domain-containing protein 2	ZRANB2	1	2.20E-64	197.28	ENVEYIEREES(1)DGEYDEFGR	2	-1.0086	46	0.834	0.601	0.597	1.431	1.183	1.354	0.918	1.041	0.818	1.030	0.983	1.210	0.908	0.577	0.730	1.389	1.203	1.119	1.675	1.61E-02
O95218	188	S	Zinc finger Ran-binding domain-containing protein 2	ZRANB2	0.999995	1.79E-27	160.8	YNLDAS(1)EEEDSNKK	2	-1.4944	32	0.757	0.498	0.669	1.245	1.714	1.116	0.918	1.041	0.818	1.030	0.983	1.210	0.825	0.478	0.818	1.209	1.744	0.922	1.827	9.33E-02
O95235	532	S	Kinesin-like protein KIF20A	KIF20A	0.95697	1.71E-04	75.968	EHS(0.001)LQVS(0.957)PS(0.042)LEK	3	0.60112	3	0.795	0.524	1.004	1.41	1.391	0.876	0.950	1.038	1.036	1.088	0.970	0.917	0.837	0.505	0.969	1.296	1.434	0.955	1.595	8.20E-02
O95239	1181	T	Chromosome-associated kinesin KIF4A	KIF4A	0.999995	1.85E-06	85.563	T(1)PPAPSPFDLPELK	2	-0.8785	8	1.026		0.602	1.155	1.023	1.194	0.998	0.929	0.938	1.034	1.027	1.073	1.028		0.642	1.117	0.996	1.113	1.288	2.14E-01
O95239	394	S	Chromosome-associated kinesin KIF4A	KIF4A	1	1.45E-07	114.87	NQS(1)LVEENEK	2	0.53631	5	0.917	0.928	1.017	1.125	1.013		0.998	0.929	0.938	1.034	1.027	1.073	0.919	0.999	1.084	1.088	0.986		1.037	6.48E-01
O95239	815	S	Chromosome-associated kinesin KIF4A	KIF4A	0.877897	3.18E-03	61.569	GQVSES(0.006)EDS(0.878)IT(0.116)K	2	2.1709	2	0.945	0.745	0.996		1.254	1.059	0.998	0.929	0.938	1.034	1.027	1.073	0.947	0.802	1.062		1.221	0.987	1.178	2.90E-01
O95251	88	T	Histone acetyltransferase KAT7	KAT7	0.970973	5.50E-03	68.761	SQQQPT(0.029)PVT(0.971)PK	2	-0.17832	3	1.075		0.937	0.802	0.962	1.224						1.000						1.224
O95251	57	S	Histone acetyltransferase KAT7	KAT7	0.980582	3.00E-17	151.41	LSQSSQDS(0.019)S(0.981)PVR	2	0.58461	3		1.483	1.528	0.36	0.628							1.000
O95292	158	S	Vesicle-associated membrane protein-associated protein B/C	VAPB	0.991721	4.76E-21	144.29	S(0.001)LS(0.992)S(0.008)SLDDTEVKK	2	0.49642	4	0.648	0.967	1.158	1.128	1.414	0.685	1.024	1.029	1.012	0.950	0.980	1.005	0.633	0.940	1.144	1.187	1.443	0.682	1.219	5.01E-01
O95292	160	S	Vesicle-associated membrane protein-associated protein B/C	VAPB	0.971742	4.84E-08	110.84	SLSS(0.026)S(0.972)LDDT(0.002)EVKK	2	-0.31691	15	0.96	1.192	0.691	1.079	1.104	0.974	1.024	1.029	1.012	0.950	0.980	1.005	0.938	1.158	0.683	1.136	1.127	0.969	1.163	3.65E-01
O95295	133	S	SNARE-associated protein Snapin	SNAPIN	0.995498	8.42E-04	56.708	AMLDS(0.004)GIY(0.001)PPGS(0.995)PGK	2	4.2854	1	0.98	0.941	0.806	1.265	1.181	0.827	1.041	1.017	0.872	1.135	0.977	0.958	0.941	0.925	0.924	1.115	1.209	0.863	1.142	2.71E-01
O95297	210	S	Myelin protein zero-like protein 1	MPZL1	0.988486	4.86E-23	149.36	DYTGCSTSES(0.011)LS(0.988)PVK	2	0.91917	4	0.965		0.783	1.265	0.923	1.065	0.931	0.949	0.906	1.125	1.058	1.031	1.037		0.864	1.124	0.872	1.033	1.063	6.40E-01
O95359	2512	S	Transforming acidic coiled-coil-containing protein 2	TACC2	0.937155	2.35E-05	93.348	FS(0.044)S(0.937)PT(0.019)EELDYR	2	-0.06664	3	0.766		0.66	1.289	1.18	1.106
O95359	2321	S	Transforming acidic coiled-coil-containing protein 2	TACC2	0.807549	2.35E-04	40.137	LDNT(0.385)PAS(0.808)PPRS(0.808)PAEPNDIPIAK	3	-1.0046	1			0.877	1.123
O95359	2317	S	Transforming acidic coiled-coil-containing protein 2	TACC2	0.997744	2.25E-05	99.161	LDNT(0.002)PAS(0.998)PPR	2	-3.2412	3			1.57	1.816	0.335	0.279
O95361	55	T	Tripartite motif-containing protein 16	TRIM16	0.976672	4.69E-12	101.6	ET(0.977)EEQDS(0.012)DS(0.012)AEQGDPAGEGK	3	0.19114	10		1.087		0.974	0.918	1.021	0.904	1.027	0.959	0.953	1.127	1.030		1.058		1.022	0.815	0.991	0.891
O95365	549	S	Zinc finger and BTB domain-containing protein 7A	ZBTB7A	1	2.48E-26	144.56	HFKDEDEDEDVAS(1)PDGLGR	3	1.8505	22	0.997	0.785	0.794	1.214	0.857	1.352	1.202	0.995	1.025	0.933	0.859	0.986	0.829	0.789	0.775	1.301	0.998	1.371	1.534	2.13E-02
O95365	526	S	Zinc finger and BTB domain-containing protein 7A	ZBTB7A	0.895375	2.53E-25	113.71	GGAPDPSPGATATPGAPAQPS(0.105)S(0.895)PDAR	3	0.40657	17	1.03	0.563	0.609	1.164	0.682	1.952	1.202	0.995	1.025	0.933	0.859	0.986	0.857	0.566	0.594	1.248	0.794	1.980	1.994	1.35E-01
O95365	337	S	Zinc finger and BTB domain-containing protein 7A	ZBTB7A	0.999984	1.96E-30	130.02	AGAAAGDS(1)DEESRADDK	2	-0.13195	3	1.177	1.24			1.175	0.407	1.202	0.995	1.025	0.933	0.859	0.986	0.979	1.246			1.368	0.413	0.800	6.98E-01
O95391	215	S	Pre-mRNA-splicing factor SLU7	SLU7	1	2.37E-07	150.44	LVEQANS(1)PK	2	-0.051095	6	0.829	0.977	0.945	0.944	1.351	0.955	0.993	0.998	0.903	1.150	1.057	0.900	0.835	0.979	1.047	0.821	1.278	1.061	1.105	5.31E-01
O95402	535	S	Mediator of RNA polymerase II transcription subunit 26	MED26	0.996003	3.11E-08	88.872	QLHVLVPQS(0.996)PPT(0.004)DLPGLTR	3	-0.56714	10	0.802	0.916	0.891	1.242	1.359	0.791
O95402	447	S	Mediator of RNA polymerase II transcription subunit 26	MED26	1	5.03E-04	72.662	ADS(1)PVHMEQQSR	2	0.23991	6	1.056	0.479	0.939	0.756		1.77
O95402	7	S	Mediator of RNA polymerase II transcription subunit 26	MED26	0.999998	3.64E-08	110.92	TAAPAS(1)PQQIR	2	1.4317	7	0.205		1.397	1.241	1.301	0.857
O95425	261	S	Supervillin	SVIL	0.916152	4.22E-10	111.93	S(0.916)PS(0.084)FGDPQLS(1)PEAR	2	-0.71372	6	0.866	1.174	0.943			1.016	0.810	0.827	0.829	1.063	1.279	1.192	1.069	1.420	1.138			0.852	0.705
O95425	245	S	Supervillin	SVIL	0.999999	9.31E-25	174.48	DSSFTEVPRS(1)PK	3	-0.077259	23	0.887	0.631	0.927	1.406	0.984	1.164	0.810	0.827	0.829	1.063	1.279	1.192	1.095	0.763	1.118	1.323	0.769	0.977	1.031	8.84E-01
O95425	270	S	Supervillin	SVIL	0.999999	4.22E-10	111.93	S(0.56)PS(0.44)FGDPQLS(1)PEAR	2	-0.49968	8	0.851	1.153	1.046	0.354	1.198	1.398	0.810	0.827	0.829	1.063	1.279	1.192	1.051	1.394	1.262	0.333	0.937	1.173	0.659	1.93E-01
O95453	619	S	Poly(A)-specific ribonuclease PARN	PARN	1	3.83E-33	205.24	KELS(1)PAGSISK	2	-0.11572	26	0.825	0.856	1.53	0.69	0.828	1.271	1.079	1.033	1.081	0.952	0.973	0.881	0.765	0.829	1.415	0.725	0.851	1.443	1.003	9.92E-01
O95466	624	S	Formin-like protein 1	FMNL1	1	1.23E-03	80.912	RDS(1)ELGPGVK	2	2.1095	4	1.146	1.238	1.029	1.077	0.775	0.734	0.867	0.827	1.045	1.021	1.168	1.072	1.322	1.497	0.985	1.055	0.664	0.685	0.632	7.67E-02
O95466	184	S	Formin-like protein 1	FMNL1	0.999249	7.45E-05	84.41	NKPLEQS(0.999)VEDLS(0.001)K	2	0.026974	5	1.036	0.89	0.549	0.848	1.5	1.177	0.867	0.827	1.045	1.021	1.168	1.072	1.195	1.076	0.525	0.831	1.284	1.098	1.149	6.01E-01
O95471	206	S	Claudin-7	CLDN7	0.787916	1.53E-02	63.076	S(0.001)NS(0.788)S(0.211)KEYV	2	-0.16891	3		0.858		0.393	1.408	1.341						1.000						1.341
O95487	329	T	Protein transport protein Sec24B	SEC24B	0.753991	1.88E-05	47.77	T(0.754)PPT(0.243)ANHPVEPVT(0.002)S(0.001)VTQPSELLQQK	3	2.0285	3	0.983	0.722	0.817		1.3	1.177	1.024	0.975	0.958	1.028	0.964	1.052	0.960	0.741	0.853		1.349	1.119	1.450	4.82E-02
O95573	688	T	Long-chain-fatty-acid--CoA ligase 3	ACSL3	0.973488	2.43E-05	73.672	LS(0.021)PEPWT(0.973)PET(0.006)GLVTDAFK	2	0.84809	6	1.117	1.254	0.978	0.99	0.804	0.857	1.024	1.038	1.061	0.943	0.991	0.943	1.091	1.208	0.922	1.050	0.811	0.909	0.860	2.37E-01
O95573	683	S	Long-chain-fatty-acid--CoA ligase 3	ACSL3	0.991479	3.30E-04	46.399	IRLS(0.991)PEPWT(0.008)PETGLVTDAFK	3	1.2625	3		0.862	1.155	0.983			1.024	1.038	1.061	0.943	0.991	0.943		0.830	1.089	1.042			1.086
O95602	360	T	DNA-directed RNA polymerase I subunit RPA1	POLR1A	0.988357	4.06E-14	101.45	LPEEVAT(0.166)PT(0.846)T(0.988)DEEKDSLIAIDR	3	-0.32923	15	0.46	0.447	1.633	0.588	1.315	1.557	1.077	1.111	1.074	0.904	0.903	0.932	0.427	0.402	1.520	0.650	1.456	1.671	1.607	3.79E-01
O95602	359	T	DNA-directed RNA polymerase I subunit RPA1	POLR1A	0.845714	1.28E-11	85.185	LPEEVAT(0.166)PT(0.846)T(0.988)DEEKDSLIAIDR	3	-0.32923	9	0.586		0.426	2.371	0.617		1.077	1.111	1.074	0.904	0.903	0.932	0.544		0.397	2.623	0.683		3.514	3.48E-01
O95602	357	T	DNA-directed RNA polymerase I subunit RPA1	POLR1A	0.996885	2.18E-31	141.48	LPEEVAT(0.997)PT(0.002)T(0.001)DEEKDSLIAIDR	3	0.86745	14	1.115	0.842	0.465	1.078	1.212	1.289	1.077	1.111	1.074	0.904	0.903	0.932	1.035	0.758	0.433	1.192	1.342	1.383	1.760	3.72E-02
O95671	21	S	N-acetylserotonin O-methyltransferase-like protein	ASMTL	0.861686	3.52E-04	90.434	VVLAS(0.138)AS(0.862)PR	2	0.15064	1		0.959	1.059	0.767		1.214	0.915	0.960	0.983	1.029	1.054	1.058		0.999	1.077	0.745		1.147	0.912	6.98E-01
O95674	33	S	Phosphatidate cytidylyltransferase 2	CDS2	0.988607	5.49E-20	158.93	VDGET(0.004)AS(0.989)DS(0.006)ES(0.001)R	2	0.21661	7	0.794	1.033	1.198	1.287	0.984	0.704	1.061	1.092	1.031	0.932	0.928	0.955	0.748	0.946	1.162	1.381	1.060	0.737	1.113	6.52E-01
O95674	21	S	Phosphatidate cytidylyltransferase 2	CDS2	0.945009	2.17E-19	130.19	VAHEPVAPPEDKES(0.945)ES(0.055)EAK	3	0.7023	10	1.074	0.479	1.276	0.948	1.031	1.192	1.061	1.092	1.031	0.932	0.928	0.955	1.012	0.439	1.238	1.017	1.111	1.248	1.256	4.06E-01
O95684	156	S	FGFR1 oncogene partner	FGFR1OP	0.999691	7.57E-36	127.47	EKGPTTGEGALDLSDVHS(1)PPKS(1)PEGK	4	-0.33138	11	1.145	0.799	1.173	1.052	0.791	1.04
O95684	160	S	FGFR1 oncogene partner	FGFR1OP	0.999999	7.57E-36	127.47	EKGPTTGEGALDLSDVHS(1)PPKS(1)PEGK	4	-0.33138	12	1.407	0.937	1.019	0.913	0.822	0.903
O95685	46	S	Protein phosphatase 1 regulatory subunit 3D	PPP1R3D	1	2.81E-04	87.719	ACRPPGS(1)PGR	2	-0.53659	11	1.144	0.598	0.654	1.231	1.021	1.352						1.000						1.352
O95714	1601	S	E3 ubiquitin-protein ligase HERC2	HERC2	1	1.38E-05	116.03	RPIAIKS(1)PK	3	-0.10943	9	1.377	1.14	1.315	0.819	0.795	0.553	1.048	1.028	0.877	1.033	0.947	1.068	1.314	1.109	1.499	0.793	0.839	0.518	0.548	1.73E-02
O95714	2928	S	E3 ubiquitin-protein ligase HERC2	HERC2	0.99971	2.68E-17	72.191	IRAEEEDLAAVPFLAS(1)DNEEEEDEKGNSGSLIR	4	0.83875	3	0.851	0.792	0.841	1.021	1.369	1.127	1.048	1.028	0.877	1.033	0.947	1.068	0.812	0.770	0.959	0.988	1.446	1.055	1.373	1.09E-01
O95758	56	S	Polypyrimidine tract-binding protein 3	PTBP3	0.999389	1.16E-06	130.99	DRPPCS(0.999)PS(0.001)R	3	-0.052552	17	1.525	0.76	0.895	1.005	0.854	0.959	0.977	0.975	1.055	0.888	1.051	1.054	1.561	0.779	0.848	1.132	0.813	0.910	0.895	6.98E-01
O95760	185	T	Interleukin-33	IL33	0.872486	1.36E-03	65.842	MLMVT(0.872)LS(0.121)PT(0.006)K	2	1.7998	5	1.205	0.832	1.191	0.909		0.863
O95772	39	S	MLN64 N-terminal domain homolog	STARD3NL	0.999983	3.11E-03	106.6	IES(1)YEGR	2	0.22877	4	0.897	0.627	0.658	1.33	1.13	1.359						1.000						1.359
O95785	996	S	Protein Wiz	WIZ	0.936228	4.44E-05	92.671	KTPLALAGS(0.936)PT(0.064)PK	2	-0.86081	11	0.809	1.005	1.229	0.763	1.559	0.636	1.100	1.164	1.164	0.847	0.929	0.795	0.735	0.863	1.056	0.901	1.678	0.800	1.273	4.56E-01
O95785	1012	S	Protein Wiz	WIZ	0.999146	7.23E-14	172.13	SPQLS(0.001)LS(0.999)PR	2	-0.17142	10	1.011	0.97	0.721	1.068	1.201	1.028	1.100	1.164	1.164	0.847	0.929	0.795	0.919	0.833	0.619	1.261	1.293	1.293	1.622	5.40E-03
O95785	1146	S	Protein Wiz	WIZ	0.999797	7.41E-19	117.21	LPPPPGS(1)PLGHSPTASPPPTAR	3	-0.16889	21	0.917	0.768	1.354	1.086	0.958	0.916	1.100	1.164	1.164	0.847	0.929	0.795	0.834	0.660	1.163	1.282	1.031	1.152	1.304	1.76E-01
O95785	1017	S	Protein Wiz	WIZ	0.999853	6.08E-05	80.362	SPQLS(0.012)LS(0.989)PRPAS(1)PK	3	-0.6468	7	1.033	1.027	0.844	1.039	1.048	1.01	1.100	1.164	1.164	0.847	0.929	0.795	0.939	0.882	0.725	1.227	1.128	1.270	1.424	9.35E-03
O95785	1134	S	Protein Wiz	WIZ	1	6.56E-20	156.96	SPSDLHIS(1)PLAK	2	1.0293	8	1.811	0.963		0.959	0.778	0.49	1.100	1.164	1.164	0.847	0.929	0.795	1.646	0.827		1.132	0.837	0.616	0.697	3.76E-01
O95785	983	S	Protein Wiz	WIZ	0.962577	3.51E-05	86.405	GLGHPPS(0.037)S(0.963)PLLK	3	-0.23703	11	1.314	0.876	0.739	0.868	1.01	1.194	1.100	1.164	1.164	0.847	0.929	0.795	1.195	0.753	0.635	1.025	1.087	1.502	1.400	2.04E-01
O95785	1006	S	Protein Wiz	WIZ	0.99998	6.48E-07	97.129	NPEDKS(1)PQLSLSPR	3	-0.59207	5	0.872	1.386	0.916	0.975	1.153	0.698	1.100	1.164	1.164	0.847	0.929	0.795	0.793	1.191	0.787	1.151	1.241	0.878	1.180	3.89E-01
O95785	1517	S	Protein Wiz	WIZ	0.97859	6.67E-06	66.845	AADGGERPLAAS(0.979)PPGT(0.021)VK	3	0.73773	5	1.091	0.775	1.28	1.036	0.818		1.100	1.164	1.164	0.847	0.929	0.795	0.992	0.666	1.100	1.223	0.881		1.144	5.74E-01
O95786	532	S	Probable ATP-dependent RNA helicase DDX58	DDX58	1	6.51E-02	46.994	DEES(1)RICK	2	-0.5277	1	0.944	0.945	0.817	0.982	1.434	0.878
O95817	173	S	BAG family molecular chaperone regulator 3	BAG3	0.954622	5.40E-29	137.3	S(0.045)QS(0.955)PAASDCSSSSSSASLPSSGR	2	-0.050902	12	0.999	0.691	0.905	1.19	1.088	1.128	1.118	1.035	1.115	0.819	0.929	0.984	0.894	0.668	0.812	1.453	1.171	1.146	1.589	1.71E-02
O95817	291	S	BAG family molecular chaperone regulator 3	BAG3	0.91729	5.54E-03	54.281	S(0.001)S(0.001)T(0.001)PLHS(0.08)PS(0.917)PIR	3	-0.15166	4		1.052	1.263	1.355	0.33		1.118	1.035	1.115	0.819	0.929	0.984		1.016	1.133	1.654	0.355		0.935	9.25E-01
O95817	386	S	BAG family molecular chaperone regulator 3	BAG3	0.782872	6.41E-37	151.05	VPPAPVPCPPPSPGPS(0.001)AVPS(0.216)S(0.783)PK	2	-0.40062	37	1.156	1.1	0.519	1.061	1.2	0.965	1.118	1.035	1.115	0.819	0.929	0.984	1.034	1.063	0.465	1.295	1.292	0.981	1.392	2.03E-01
O95817	285	T	BAG family molecular chaperone regulator 3	BAG3	0.845773	7.50E-09	103.13	S(0.007)S(0.008)T(0.846)PLHS(0.386)PS(0.754)PIR	2	0.6376	3	0.448	1.072	1.287	1.38	0.814		1.118	1.035	1.115	0.819	0.929	0.984	0.401	1.036	1.154	1.685	0.876		1.483	4.00E-01
O95817	406	T	BAG family molecular chaperone regulator 3	BAG3	0.999015	8.05E-07	64.701	AAPST(0.001)APAEAT(0.999)PPKPGEAEAPPK	3	0.55607	3	0.994	1.101		0.664	1.241		1.118	1.035	1.115	0.819	0.929	0.984	0.889	1.064		0.811	1.336		1.099	7.60E-01
O95817	377	S	BAG family molecular chaperone regulator 3	BAG3	0.998085	4.17E-16	95.459	VPPAPVPCPPPS(0.998)PGPS(0.027)AVPS(0.281)S(0.694)PK	3	-0.91492	44	0.954	0.934	0.852	1.059	1.144	1.056	1.118	1.035	1.115	0.819	0.929	0.984	0.853	0.902	0.764	1.293	1.231	1.073	1.428	9.54E-03
O95819	627	T	Mitogen-activated protein kinase kinase kinase kinase 4	MAP4K4	0.892004	7.19E-04	82.261	T(0.892)T(0.097)S(0.009)RS(0.003)PVLSR	3	0.040285	2		0.754		1.246			1.002	0.941	0.986	0.942	1.002	1.126		0.801		1.323			1.651
O95819	631	S	Mitogen-activated protein kinase kinase kinase kinase 4	MAP4K4	0.958797	7.13E-06	105.66	T(0.006)TS(0.034)RS(0.959)PVLSR	3	-0.8427	2	0.653				1.347		1.002	0.941	0.986	0.942	1.002	1.126	0.652				1.344		2.063
O95831	116	S	Apoptosis-inducing factor 1, mitochondrial	AIFM1	0.994516	3.77E-07	102.5	AALS(0.995)AS(0.005)EGEEVPQDK	2	-0.090378	5		1.344		0.604	1.281	0.771	1.047	1.013	1.038	0.944	1.002	0.956		1.327		0.640	1.278	0.806	0.685
O95831	268	S	Apoptosis-inducing factor 1, mitochondrial	AIFM1	0.999998	3.15E-03	124.92	SLS(1)AIDR	2	0.058987	11	1.175	0.952	0.892	0.937	1.181	0.862	1.047	1.013	1.038	0.944	1.002	0.956	1.122	0.940	0.859	0.993	1.179	0.902	1.052	6.77E-01
O95835	246	T	Serine/threonine-protein kinase LATS1	LATS1	0.999901	9.16E-05	111.27	SVT(1)PPPPPR	2	0.25381	22	0.804	1.036	1.142	0.995	1.156	0.867
O95835	613	S	Serine/threonine-protein kinase LATS1	LATS1	0.998087	3.15E-09	128.21	QITT(0.001)S(0.998)PITVR	2	0.5281	8	1.071			1.124	0.75	1.055
O96007	20	S	Molybdopterin synthase catalytic subunit	MOCS2	0.999997	1.62E-06	79.467	LPLS(1)PPLVEDSAFEPSR	3	-0.010307	3		0.58	0.605	1.385	1.139	1.291
O96013	104	S	Serine/threonine-protein kinase PAK 4	PAK4	1	4.37E-07	152.23	RDS(1)PPPPAR	3	-0.064847	26	1.572	0.782	0.843	0.92	0.94	0.942	0.970	0.984	1.200	0.865	0.972	1.009	1.621	0.795	0.703	1.064	0.967	0.934	0.951	8.70E-01
O96013	474	S	Serine/threonine-protein kinase PAK 4	PAK4	0.998522	9.83E-06	84.436	S(0.999)LVGT(0.001)PYWMAPELISR	2	-1.0842	14	0.96	0.875	0.946	1.106	1.467	0.646	0.970	0.984	1.200	0.865	0.972	1.009	0.990	0.889	0.788	1.279	1.509	0.640	1.285	3.95E-01
O96013	181	S	Serine/threonine-protein kinase PAK 4	PAK4	0.99989	7.84E-23	120.93	DKRPLS(1)GPDVGTPQPAGLASGAK	3	0.057701	12	1.069	1.544	1.259	0.763	0.864	0.501	0.970	0.984	1.200	0.865	0.972	1.009	1.102	1.569	1.049	0.882	0.889	0.497	0.609	8.24E-02
O96013	207	T	Serine/threonine-protein kinase PAK 4	PAK4	0.999996	2.80E-02	80.219	PFNT(1)YPR	2	-1.2687	4	1.602	0.782	1.101		0.515		0.970	0.984	1.200	0.865	0.972	1.009	1.652	0.795	0.918		0.530		0.473
O96028	544	T	Histone-lysine N-methyltransferase NSD2	WHSC1	0.999908	2.00E-06	103.92	IQDPTEDAEAEDT(1)PR	2	0.27138	4	1.309	0.879	1.173	0.924	0.82	0.895	1.101	0.831	1.050	0.952	1.064	1.002	1.189	1.058	1.117	0.971	0.771	0.893	0.783	2.49E-02
P00505	166	T	Aspartate aminotransferase, mitochondrial	GOT2	0.999434	1.49E-03	64.224	PT(0.001)WGNHT(0.999)PIFR	3	-0.045049	4		1.087	0.86	0.73	1.055	1.267	0.984	1.010	1.037	0.964	1.011	0.995		1.076	0.829	0.757	1.044	1.273	1.076	7.58E-01
P00533	693	T	Epidermal growth factor receptor	EGFR	0.99982	4.70E-59	187.57	ELVEPLT(1)PSGEAPNQALLR	2	0.34172	52	1.019	1.02	0.804	1.048	1.062	1.048	1.005	1.060	1.046	0.984	0.962	0.943	1.014	0.962	0.769	1.065	1.104	1.111	1.195	7.87E-02
P00533	1041	T	Epidermal growth factor receptor	EGFR	0.819039	2.42E-13	110.03	TPLLSS(0.003)LS(0.042)AT(0.819)S(0.135)NNSTVACIDR	2	0.16025	2	0.643	1.116	0.309	1.99	0.941		1.005	1.060	1.046	0.984	0.962	0.943	0.640	1.053	0.295	2.022	0.978		2.264	1.80E-01
P00533	1042	S	Epidermal growth factor receptor	EGFR	0.777937	4.09E-13	97.384	TPLLS(0.081)S(0.41)LS(0.224)AT(0.487)S(0.778)NNS(0.016)T(0.003)VACIDR	3	-1.3671	2		0.573		1.021	1.406		1.005	1.060	1.046	0.984	0.962	0.943		0.541		1.038	1.462		2.312
P00533	991	S	Epidermal growth factor receptor	EGFR	0.99975	9.20E-22	146.59	MHLPS(1)PTDSNFYR	2	-1.3745	19	0.902	0.822	0.824	1.175	1.04	1.236	1.005	1.060	1.046	0.984	0.962	0.943	0.898	0.775	0.788	1.194	1.081	1.311	1.457	8.14E-03
P00558	203	S	Phosphoglycerate kinase 1	PGK1	1	1.30E-25	141.6	ALES(1)PERPFLAILGGAK	2	-0.36746	22	0.656	0.849	0.672	0.895	2.134	0.793	0.926	0.946	0.960	1.010	1.043	1.115	0.708	0.897	0.700	0.886	2.046	0.711	1.580	3.52E-01
P01106	62	S	Myc proto-oncogene protein	MYC	0.939818	1.44E-27	164.01	KFELLPT(0.043)PPLS(0.94)PS(0.017)R	2	0.0027581	27	1.351	1.055	0.994	1.008	0.732	0.859						1.000						0.859
P02545	632	S	Prelamin-A/C	LMNA	0.861762	5.48E-06	75.773	S(0.128)VGGS(0.862)GGGS(0.01)FGDNLVTR	2	-0.7198	4			0.372	1.285	1.343
P02545	107	S	Prelamin-A/C	LMNA	1	3.08E-03	91.265	LQLELS(1)K	2	-0.25394	5	1.255	0.914	0.738	1.148		0.945
P02545	407	S	Prelamin-A/C	LMNA	0.95887	1.02E-07	105.91	AS(0.916)S(0.081)HS(0.032)S(0.959)QT(0.012)QGGGSVTK	2	-0.088584	4	1.745	0.913		0.784	0.802	0.756
P02545	22	S	Prelamin-A/C	LMNA	0.875986	1.11E-48	200.13	SGAQASSTPLS(0.876)PT(0.124)R	2	-0.54071	11	0.854	0.915	0.965	0.881	1.484	0.901
P02545	301	S	Prelamin-A/C	LMNA	0.999245	5.32E-22	150.76	IDS(0.999)LS(0.001)AQLSQLQK	2	0.97908	8	2.303	0.633	0.748	0.896	0.858	0.562
P02545	403	S	Prelamin-A/C	LMNA	0.916346	1.56E-07	102.07	AS(0.916)S(0.081)HS(0.032)S(0.959)QT(0.012)QGGGSVTK	2	-0.088584	4		0.934	1.245		0.82
P02545	390	S	Prelamin-A/C	LMNA	0.999999	1.24E-25	193.51	LRLS(1)PS(0.994)PT(0.006)SQR	2	-0.17337	105	1.104	1.092	0.987	0.96	0.916	0.94
P02545	458	S	Prelamin-A/C	LMNA	0.995892	2.50E-04	65.467	NKS(0.996)NEDQS(0.004)MGNWQIK	3	-0.68795	4	1.557	0.868	0.975	0.943	0.761	0.896
P02545	429	S	Prelamin-A/C	LMNA	0.980424	9.96E-04	125.57	S(0.02)S(0.98)FSQHAR	2	-0.079112	7	0.92	1.933	0.995	0.721	0.539	0.893
P02545	651	S	Prelamin-A/C	LMNA	0.755179	1.78E-11	152.31	SYLLGNS(0.755)S(0.245)PR	2	0.52131	2	0.204	0.283	0.155	3.358
P02545	277	S	Prelamin-A/C	LMNA	1	3.61E-05	98.592	LDNARQS(1)AER	2	1.1049	4		2.358	0.339		0.303
P02545	392	S	Prelamin-A/C	LMNA	0.99963	2.01E-11	145.7	LRLS(1)PS(1)PTSQR	3	0.048346	64	1.1	1.113	1.13	0.85	1.01	0.798
P02545	423	S	Prelamin-A/C	LMNA	0.983829	1.52E-29	163.12	KLES(0.984)T(0.016)ESR	2	0.86777	10	0.7	0.882	0.996	1.323	1.099
P02545	404	S	Prelamin-A/C	LMNA	0.963523	3.13E-32	150.23	AS(0.032)S(0.964)HS(0.005)SQTQGGGSVTK	2	1.0667	19	1.242		0.268	1.793	1.16	0.538
P02751	2384	S	Fibronectin	FN1	1	2.22E-12	73.771	TNTNVNCPIECFMPLDVQADREDS(1)RE	3	-1.2865	3		1.025	1.086	1.001		0.888	1.082	1.131	1.126	0.872	0.887	0.903		0.906	0.964	1.148		0.983	1.139	2.74E-01
P02794	179	S	Ferritin heavy chain	FTH1	0.999493	5.31E-08	101.5	HT(0.001)LGDS(0.999)DNES	2	0.090377	5	1.537		1.707	0.583	0.743	0.429	1.438	1.367	1.176	0.641	0.670	0.707	1.069		1.452	0.910	1.109	0.607	0.694	2.02E-01
P04035	356	S	3-hydroxy-3-methylglutaryl-coenzyme A reductase	HMGCR	0.97479	4.34E-05	89.858	NPIT(0.012)S(0.975)PVVT(0.013)QK	2	0.44077	3	0.347	0.3	0.406	1.358	1.527	2.061	0.576	0.473	0.401	1.570	1.383	1.597	0.602	0.634	1.012	0.865	1.104	1.291	1.449	1.35E-01
P04049	621	S	RAF proto-oncogene serine/threonine-protein kinase	RAF1	0.999968	1.24E-05	127.7	SAS(1)EPSLHR	2	-0.14837	10	0.591	0.971	0.907	1.111	1.359	1.062	0.858	0.907	0.842		1.189	1.204	0.689	1.071	1.077		1.143	0.882	1.071	7.50E-01
P04049	259	S	RAF proto-oncogene serine/threonine-protein kinase	RAF1	0.8721	2.45E-07	78.272	S(0.038)T(0.038)S(0.872)T(0.051)PNVHMVSTTLPVDSR	3	-0.52607	5		0.958	1.006	0.951	0.93	1.155	0.858	0.907	0.842		1.189	1.204		1.056	1.195		0.782	0.959	0.774	1.52E-01
P04075	39	S	Fructose-bisphosphate aldolase A	ALDOA	0.83348	3.99E-05	85.51	GILAADES(0.035)T(0.132)GS(0.833)IAK	2	-1.722	1	1.123	0.902	0.774	1.093	0.856	1.252	1.011	0.982	0.978	0.974	1.032	1.024	1.111	0.919	0.791	1.122	0.829	1.223	1.125	4.76E-01
P04183	13	S	Thymidine kinase, cytosolic	TK1	0.889418	2.89E-16	134.29	SCINLPTVLPGS(0.889)PS(0.11)K	2	0.10942	11	1.008	1.062	0.944	1.022	0.903	1.06	0.914	0.910	0.931	1.114	1.191	0.940	1.103	1.167	1.014	0.917	0.758	1.128	0.854	2.39E-01
P04626	1166	T	Receptor tyrosine-protein kinase erbB-2	ERBB2	1	4.38E-06	110.8	PAGAT(1)LERPK	2	0.47052	3	0.573	0.686	0.428	1.849	1.183	1.281	1.036	0.838	0.769	0.979	1.287	1.091	0.553	0.819	0.557	1.889	0.919	1.174	2.065	8.69E-02
P04637	9	S	Cellular tumor antigen p53	TP53	0.779432	4.15E-06	52.359	MEEPQS(0.703)DPS(0.779)VEPPLS(0.438)QET(0.066)FS(0.014)DLWK	3	-1.1751	1	0.753	0.669		1.578			1.091	0.988	0.948	0.984	0.997	0.993	0.690	0.677		1.604			2.346
P04792	65	S	Heat shock protein beta-1	HSPB1	0.999999	5.44E-07	72.316	PLPPAAIES(1)PAVAAPAYSR	3	0.30267	5	0.641		0.437	1.339	1.52	1.063	0.830	0.889	0.831	1.142	1.089	1.218	0.772		0.526	1.173	1.396	0.873	1.767	1.05E-01
P04792	82	S	Heat shock protein beta-1	HSPB1	0.999993	2.41E-11	151.52	QLS(1)SGVSEIR	2	0.0094544	20	0.805	0.801	0.736	1.599	2.05	0.009	0.830	0.889	0.831	1.142	1.089	1.218	0.970	0.901	0.886	1.400	1.882	0.007	1.194	7.68E-01
P04792	15	S	Heat shock protein beta-1	HSPB1	1	6.10E-04	134.23	GPS(1)WDPFR	2	0.10363	23	0.645	0.398	0.496	1.62	1.435	1.406	0.830	0.889	0.831	1.142	1.089	1.218	0.777	0.448	0.597	1.419	1.318	1.154	2.136	4.89E-03
P05023	16	S	Sodium/potassium-transporting ATPase subunit alpha-1	ATP1A1	0.999999	6.75E-05	78.917	DKYEPAAVS(1)EQGDKK	3	0.73384	4	0.953		0.624	1.223	0.935	1.265	1.067	1.073	1.032	0.935	0.924	0.969	0.893		0.605	1.308	1.012	1.305	1.614	7.00E-02
P05023	47	S	Sodium/potassium-transporting ATPase subunit alpha-1	ATP1A1	0.999807	3.22E-04	56.081	EVSMDDHKLS(1)LDELHR	4	-0.69179	3	1.085	1.414		0.802	0.857	0.842	1.067	1.073	1.032	0.935	0.924	0.969	1.017	1.318		0.858	0.927	0.869	0.758	9.21E-02
P05362	530	T	Intercellular adhesion molecule 1	ICAM1	0.996196	1.28E-04	92.593	GTPMKPNT(0.004)QAT(0.996)PP	2	0.065856	6	1.456	0.954	0.781	0.738	1.031	1.04	1.125	1.117	1.187	0.857	0.834	0.880	1.294	0.854	0.658	0.861	1.236	1.182	1.169	5.16E-01
P05387	102	S	60S acidic ribosomal protein P2	RPLP2	1	3.97E-45	177.29	KEES(1)EES(1)DDDMGFGLFD	3	0.27597	107	1.102	0.855	0.772	1.111	1.178	0.982	0.911	0.980	0.957	1.077	1.011	1.063	1.210	0.872	0.807	1.032	1.165	0.924	1.080	6.18E-01
P05387	16	S	60S acidic ribosomal protein P2	RPLP2	0.83882	4.03E-19	127.35	YVASYLLAALGGNS(0.839)S(0.138)PS(0.024)AK	2	0.78367	6	1.11		0.761			1.13	0.911	0.980	0.957	1.077	1.011	1.063	1.218		0.795			1.063	1.056
P05387	86	S	60S acidic ribosomal protein P2	RPLP2	0.960271	5.47E-07	45.424	LASVPAGGAVAVS(0.019)AAPGS(0.021)AAPAAGS(0.96)APAAAEEK	4	-0.085242	1			0.748			1.252	0.911	0.980	0.957	1.077	1.011	1.063			0.782			1.178	1.507
P05387	105	S	60S acidic ribosomal protein P2	RPLP2	1	7.89E-20	121.82	KEES(1)EES(1)DDDMGFGLFD	3	0.27597	17	0.749	0.433		1.411		1.408	0.911	0.980	0.957	1.077	1.011	1.063	0.822	0.442		1.310		1.325	2.084	6.92E-02
P05412	63	S	Transcription factor AP-1	JUN	0.999076	9.56E-28	158.17	NSDLLT(0.001)S(0.999)PDVGLLK	2	0.4311	12	0.521	0.346	0.442	1.583	1.644	1.465	0.581	0.643	0.570	1.427	1.511	1.268	0.897	0.538	0.775	1.109	1.088	1.155	1.517	2.37E-02
P05455	92	S	Lupus La protein	SSB	0.790919	2.83E-05	91.547	S(0.791)PS(0.209)KPLPEVTDEYK	2	0.67363	3	0.848	0.739	0.864	1.455	1.019	1.075	0.900	0.903	1.015	1.052	1.069	1.063	0.942	0.818	0.851	1.383	0.953	1.011	1.282	1.54E-01
P05455	366	S	Lupus La protein	SSB	1	5.15E-108	228.6	FAS(1)DDEHDEHDENGATGPVK	2	0.09614	51	1.115	0.843	1.108	0.84	1.274	0.819	0.900	0.903	1.015	1.052	1.069	1.063	1.239	0.934	1.092	0.798	1.192	0.770	0.846	3.59E-01
P05771	500	T	Protein kinase C beta type	PRKCB	0.989205	3.05E-13	105.72	T(0.989)FCGT(0.011)PDYIAPEIIAYQPYGK	2	0.38288	17	0.765	0.795	0.665	1.293	1.481	1
P05783	93	S	Keratin, type I cytoskeletal 18	KRT18	0.999959	3.38E-03	85.744	LAS(1)YLDR	2	0.40406	5	1.418	0.681	0.911	0.919	1.045	1.025
P05783	100	S	Keratin, type I cytoskeletal 18	KRT18	0.999997	1.03E-09	163.09	VRS(1)LETENR	2	1.0029	3	1.02	1.156				0.825
P05783	31	S	Keratin, type I cytoskeletal 18	KRT18	0.978963	2.86E-35	165.06	PVS(0.021)S(0.979)AASVYAGAGGSGSR	2	0.47446	16	0.908	1.245	1.092	1.008	1.113	0.634
P06400	356	T	Retinoblastoma-associated protein	RB1	0.886484	1.48E-08	99.407	TLQTDSIDS(0.057)FET(0.057)QRT(0.886)PR	3	0.11688	3	1.317	0.808		0.875			0.831	0.860	0.948	1.057	1.226	1.078	1.585	0.940		0.828			0.656
P06400	373	T	Retinoblastoma-associated protein	RB1	0.999998	6.82E-13	93.804	KSNLDEEVNVIPPHT(1)PVR	3	0.33341	18	1.136	0.853	1.155	1.218	0.825	0.813	0.831	0.860	0.948	1.057	1.226	1.078	1.367	0.992	1.218	1.152	0.673	0.754	0.721	1.45E-01
P06400	795	S	Retinoblastoma-associated protein	RB1	0.982493	3.38E-03	85.862	FPS(0.018)S(0.982)PLR	2	-0.45269	8	1.094		0.827	1.095		0.985	0.831	0.860	0.948	1.057	1.226	1.078	1.316		0.872	1.036		0.914	0.891	6.55E-01
P06400	37	S	Retinoblastoma-associated protein	RB1	1	6.56E-48	116.59	TAATAAAAAAEPPAPPPPPPPEEDPEQDS(1)GPEDLPLVR	4	-0.10237	38	1.031	0.841	0.945	1.095	1.052	1.037	0.831	0.860	0.948	1.057	1.226	1.078	1.241	0.978	0.997	1.036	0.858	0.962	0.888	2.93E-01
P06400	807	S	Retinoblastoma-associated protein	RB1	1	6.79E-15	137.17	IPGGNIYIS(1)PLK	2	0.012347	19	1.18	0.917	0.853	1.093	1.066	0.893	0.831	0.860	0.948	1.057	1.226	1.078	1.420	1.066	0.900	1.034	0.869	0.828	0.807	2.59E-01
P06400	794	S	Retinoblastoma-associated protein	RB1	0.965902	6.80E-03	74.92	FPS(0.966)S(0.034)PLR	2	-0.69093	5	1.389	0.852	0.855		0.904		0.831	0.860	0.948	1.057	1.226	1.078	1.671	0.991	0.902		0.737		0.621
P06493	161	T	Cyclin-dependent kinase 1	CDK1	0.998965	1.89E-09	102.52	VY(0.001)T(0.999)HEVVTLWYR	3	-0.64121	57	0.835		0.884	1.065	1.369	0.847	0.915	0.996	0.940	1.076	1.054	1.018	0.913		0.940	0.990	1.299	0.832	1.123	5.67E-01
P06493	15	Y	Cyclin-dependent kinase 1	CDK1	0.983597	7.68E-04	87.184	IGEGT(0.014)Y(0.984)GVVY(0.003)K	2	0.95982	8	0.957	0.746	0.649	1.253	1.121	1.274	0.915	0.996	0.940	1.076	1.054	1.018	1.046	0.749	0.690	1.164	1.064	1.251	1.400	5.40E-02
P06493	14	T	Cyclin-dependent kinase 1	CDK1	0.999976	2.89E-03	75.764	IGEGT(1)YGVVYK	2	-0.79395	4	1.105	1.455	1.239	0.662	0.87	0.669	0.915	0.996	0.940	1.076	1.054	1.018	1.208	1.461	1.318	0.615	0.825	0.657	0.526	2.96E-03
P06748	70	S	Nucleophosmin	NPM1	1	5.34E-83	223.81	DELHIVEAEAMNYEGS(1)PIK	2	-1.1318	972	0.98	1.102	0.922	0.938	1.172	0.885	1.013	0.975	0.968	1.024	1.021	1.000	0.967	1.130	0.952	0.916	1.148	0.885	0.967	7.54E-01
P06748	139	S	Nucleophosmin	NPM1	0.999939	4.90E-04	140.17	LLSIS(1)GKR	2	0.46538	19	1.083	0.616	0.718	1.091	1.219	1.274	1.013	0.975	0.968	1.024	1.021	1.000	1.069	0.632	0.742	1.065	1.194	1.274	1.447	6.59E-02
P06748	199	T	Nucleophosmin	NPM1	0.997803	1.53E-02	80.17	S(0.002)IRDT(0.998)PAK	2	0.43712	2	0.904	1.125	1.244	0.816	0.91		1.013	0.975	0.968	1.024	1.021	1.000	0.892	1.154	1.285	0.797	0.891		0.760	1.80E-01
P06748	243	S	Nucleophosmin	NPM1	0.990677	9.59E-06	140.17	GPS(0.009)S(0.991)VEDIK	2	1.4869	9	0.907	0.912	1.105	1.089	1.135	0.853	1.013	0.975	0.968	1.024	1.021	1.000	0.895	0.935	1.142	1.063	1.112	0.853	1.019	8.74E-01
P06748	137	S	Nucleophosmin	NPM1	0.999145	2.82E-03	103.87	LLS(0.999)IS(0.001)GK	2	-0.12013	18	0.958	0.991	0.78	0.954	1.197	1.12	1.013	0.975	0.968	1.024	1.021	1.000	0.946	1.016	0.806	0.932	1.172	1.120	1.165	1.88E-01
P06748	4	S	Nucleophosmin	NPM1	0.99999	2.14E-15	84.327	MEDS(1)MDMDMSPLRPQNYLFGCELK	3	-0.59648	77	0.903	1.008	0.887	1.022	1.025	1.155	1.013	0.975	0.968	1.024	1.021	1.000	0.891	1.034	0.916	0.998	1.004	1.155	1.111	1.95E-01
P06748	254	S	Nucleophosmin	NPM1	1	7.04E-03	88.392	MQAS(1)IEK	2	-0.20964	10	1.005	0.767	0.909	0.921	1.206	1.192	1.013	0.975	0.968	1.024	1.021	1.000	0.992	0.787	0.939	0.899	1.181	1.192	1.204	1.80E-01
P06748	125	S	Nucleophosmin	NPM1	1	3.92E-64	160.58	CGSGPVHISGQHLVAVEEDAES(1)EDEEEEDVK	4	-0.73569	455	0.945	1.36	0.648	1.068	1.27	0.708	1.013	0.975	0.968	1.024	1.021	1.000	0.933	1.395	0.669	1.043	1.244	0.708	0.999	9.98E-01
P06748	10	S	Nucleophosmin	NPM1	0.999786	4.97E-11	77.731	MEDSMDMDMS(1)PLRPQNYLFGCELK	3	-0.53118	15	0.897		0.868	1.328	0.882	1.025	1.013	0.975	0.968	1.024	1.021	1.000	0.885		0.897	1.297	0.864	1.025	1.192	3.72E-01
P07199	156	S	Major centromere autoantigen B	CENPB	0.999983	4.09E-29	136.2	TPAAPAS(1)PAAVPSEGSGGSTTGWR	2	1.2447	10	1.158	1.061	0.906	0.88	1.059	0.936	1.201	0.975	1.057	0.840	0.981	0.946	0.964	1.088	0.857	1.048	1.080	0.989	1.071	3.91E-01
P07355	18	S	Annexin A2	ANXA2	0.821956	6.46E-13	112.14	LSLEGDHS(0.822)T(0.178)PPSAYGSVK	2	0.9492	9	0.9	1.118				0.983	0.852	0.859	0.845	1.201	1.114	1.129	1.056	1.302				0.871	0.739
P07355	3	T	Annexin A2	ANXA2	0.880398	2.70E-07	150.09	S(0.12)T(0.88)VHEILCK	2	-0.53354	7	0.829	0.951	0.829	1.276	1.216	0.9	0.852	0.859	0.845	1.201	1.114	1.129	0.973	1.107	0.981	1.062	1.092	0.797	0.964	7.40E-01
P07355	24	Y	Annexin A2	ANXA2	0.8633	4.68E-06	72.932	LSLEGDHSTPPS(0.018)AY(0.863)GS(0.119)VK	3	0.741	8	1.458	0.786	0.611	1.155	0.865	1.125	0.852	0.859	0.845	1.201	1.114	1.129	1.711	0.915	0.723	0.962	0.776	0.996	0.816	5.45E-01
P07355	12	S	Annexin A2	ANXA2	0.999072	1.35E-07	89.663	LS(0.999)LEGDHS(0.001)TPPSAYGSVK	2	-0.83599	12	0.737	1.106		0.761	1.752	0.643	0.852	0.859	0.845	1.201	1.114	1.129	0.865	1.288		0.634	1.573	0.570	0.860	7.58E-01
P07355	184	S	Annexin A2	ANXA2	1	1.80E-12	114.15	RAEDGS(1)VIDYELIDQDAR	2	2.0294	7	1.656	0.465	1.24	0.953	0.927	0.758	0.852	0.859	0.845	1.201	1.114	1.129	1.944	0.541	1.467	0.794	0.832	0.671	0.581	2.54E-01
P07437	172	S	Tubulin beta chain	TUBB	0.86827	5.33E-03	51.798	IMNTFS(0.131)VVPS(0.868)PK	2	0.28977	1		1.41	0.691		0.899		0.868	0.884	0.801	1.210	1.185	1.052		1.595	0.863		0.759		0.617
P07814	886	S	Bifunctional glutamate/proline--tRNA ligase	EPRS	0.774016	3.43E-27	150.95	EYIPGQPPLSQSSDS(0.086)S(0.774)PT(0.14)R	3	0.079581	38	1.131	0.93	0.94	1.459	0.15	1.391	0.965	1.007	1.000	1.027	0.978	1.022	1.172	0.924	0.940	1.421	0.153	1.361	0.967	9.40E-01
P07814	882	S	Bifunctional glutamate/proline--tRNA ligase	EPRS	0.931156	4.49E-10	99.219	EYIPGQPPLS(0.009)QS(0.931)S(0.06)DS(0.227)S(0.655)PT(0.118)R	3	-0.38133	11	1.112	0.915	0.812	0.896	1.267	0.998	0.965	1.007	1.000	1.027	0.978	1.022	1.152	0.909	0.812	0.872	1.296	0.977	1.094	6.08E-01
P07900	231	S	Heat shock protein HSP 90-alpha	HSP90AA1	1	2.47E-95	250.83	EVS(1)DDEAEEKEDKEEEK	2	-2.6772	91	0.849	0.999	1.425	1.071	1.011	0.646	0.961	0.986	0.970	1.040	1.023	1.020	0.883	1.013	1.469	1.030	0.988	0.633	0.788	3.35E-01
P07900	263	S	Heat shock protein HSP 90-alpha	HSP90AA1	1	5.86E-108	238.7	ESEDKPEIEDVGS(1)DEEEEKK	2	-0.79873	212	1.447	1.186	1.034	0.869	0.608	0.856	0.961	0.986	0.970	1.040	1.023	1.020	1.506	1.203	1.066	0.836	0.594	0.839	0.601	3.06E-02
P07910	240	S	Heterogeneous nuclear ribonucleoproteins C1/C2	HNRNPC	0.75202	3.05E-59	219.77	NDKSEEEQSS(0.001)S(0.752)S(0.247)VK	2	0.36175	4		0.323		2.584		0.092	1.010	1.027	1.002	0.984	0.943	1.034		0.315		2.626		0.089	4.316
P07910	238	S	Heterogeneous nuclear ribonucleoproteins C1/C2	HNRNPC	0.899224	1.90E-09	109.37	SEEEQS(0.899)S(0.123)S(0.123)S(0.854)VKKDET(0.001)NVK	2	0.53846	8	0.558	1.061	1.377	0.72	1.283		1.010	1.027	1.002	0.984	0.943	1.034	0.552	1.033	1.374	0.732	1.361		1.060	8.87E-01
P07910	233	S	Heterogeneous nuclear ribonucleoproteins C1/C2	HNRNPC	1	4.38E-59	216.6	NDKS(1)EEEQSSSSVK	2	0.14124	19	1.111	0.817	1.552	0.821	0.985	0.713	1.010	1.027	1.002	0.984	0.943	1.034	1.100	0.796	1.549	0.834	1.045	0.690	0.746	2.94E-01
P07910	241	S	Heterogeneous nuclear ribonucleoproteins C1/C2	HNRNPC	0.97703	9.31E-26	152.9	SEEEQSS(0.001)S(0.022)S(0.977)VKKDETNVK	2	-0.99507	20	0.876	1.275	1.777	0.873	1.074	0.124	1.010	1.027	1.002	0.984	0.943	1.034	0.867	1.241	1.773	0.887	1.139	0.120	0.553	2.25E-01
P07919	63	T	Cytochrome b-c1 complex subunit 6, mitochondrial	UQCRH	0.907376	7.09E-46	174.72	S(0.093)HT(0.907)EEDCTEELFDFLHAR	3	-0.45386	10	1.156	1.507		0.863	0.638	0.836	1.116	0.956	1.278	0.895	0.870	0.883	1.036	1.576		0.964	0.733	0.947	0.675	1.53E-01
P07948	11	S	Tyrosine-protein kinase Lyn	LYN	1	1.89E-15	138.23	GKDS(1)LS(1)DDGVDLK	2	-0.059905	20	1.492	1.062	1.176	1	0.393	0.875	1.072	1.064	1.005	0.946	0.895	1.019	1.392	0.998	1.170	1.057	0.439	0.859	0.661	1.35E-01
P07948	13	S	Tyrosine-protein kinase Lyn	LYN	1	2.68E-39	184.21	GKDS(1)LS(1)DDGVDLK	2	-0.059905	30	1.25	0.809	0.858	1.098	1.19	0.794	1.072	1.064	1.005	0.946	0.895	1.019	1.166	0.760	0.854	1.161	1.330	0.779	1.176	4.68E-01
P08195	165	S	4F2 cell-surface antigen heavy chain	SLC3A2	0.999983	3.25E-11	140.6	FTGLS(1)KEELLK	2	0.34274	16	1.773	0.642	0.688	1.132	0.981	0.783	1.012	1.050	1.030	0.919	0.974	1.015	1.752	0.611	0.668	1.232	1.007	0.771	0.993	9.87E-01
P08238	261	S	Heat shock protein HSP 90-beta	HSP90AB1	1	3.05E-24	115.99	IEDVGS(1)DEEDDS(1)GKDKK	2	0.74284	28	1.089	0.672	0.764	1.296	1.018	1.161	0.972	0.905	0.953	1.058	1.087	1.025	1.120	0.743	0.802	1.225	0.937	1.133	1.236	2.21E-01
P08238	255	S	Heat shock protein HSP 90-beta	HSP90AB1	1	4.06E-81	218.14	IEDVGS(1)DEEDDS(1)GKDKK	2	0.74284	203	0.855	0.906	0.983	1.143	1.34	0.772	0.972	0.905	0.953	1.058	1.087	1.025	0.880	1.001	1.031	1.080	1.233	0.753	1.053	7.48E-01
P08238	226	S	Heat shock protein HSP 90-beta	HSP90AB1	1	9.06E-82	229.48	EKEIS(1)DDEAEEEKGEK	2	-0.30754	88	1.043	0.807	0.814	1.296	0.903	1.135	0.972	0.905	0.953	1.058	1.087	1.025	1.073	0.892	0.854	1.225	0.831	1.107	1.122	4.43E-01
P08559	232	S	Pyruvate dehydrogenase E1 component subunit alpha, somatic form, mitochondrial	PDHA1	0.960916	1.14E-03	78.548	YGMGT(0.039)S(0.961)VER	2	-0.023619	3	0.647	0.868	0.532	1.274	1.743	0.936	1.033	1.148	0.986	0.965	0.880	0.988	0.626	0.756	0.540	1.320	1.981	0.947	2.210	6.59E-02
P08559	293	S	Pyruvate dehydrogenase E1 component subunit alpha, somatic form, mitochondrial	PDHA1	0.999718	2.10E-11	124.5	YHGHS(1)MSDPGVSYR	3	-0.32455	56	0.889	1.406	0.837	0.789	0.757	1.323	1.033	1.148	0.986	0.965	0.880	0.988	0.861	1.225	0.849	0.818	0.860	1.339	1.028	9.01E-01
P08581	977	T	Hepatocyte growth factor receptor	MET	1	2.25E-03	76.228	VHT(1)PHLDR	3	-0.087187	4	0.696	0.961	0.79	0.988	1.402	1.162	1.124	1.141	1.201	0.809	0.865	0.861	0.619	0.842	0.658	1.221	1.621	1.350	1.978	7.16E-03
P08621	226	S	U1 small nuclear ribonucleoprotein 70 kDa	SNRNP70	1	1.78E-15	136.34	PGPS(1)PLPHR	2	0.25814	57	1.215	1.064	0.712	1.044	0.952	1.012	1.096	1.022	0.983	0.945	0.901	1.052	1.109	1.041	0.724	1.105	1.057	0.962	1.087	5.44E-01
P08651	339	S	Nuclear factor 1 C-type	NFIC	0.999915	3.61E-50	212.35	SPFNSPS(1)PQDSPR	2	-2.7365	10	0.988	1.651		0.832	0.744	0.785	1.005	1.025	1.014	1.095	1.142	0.718	0.983	1.611		0.760	0.651	1.093	0.644	2.10E-01
P08754	62	S	Guanine nucleotide-binding protein G(k) subunit alpha	GNAI3	0.999778	4.89E-06	95.582	IIHEDGYS(1)EDECK	2	-0.87623	3	1.144	0.944	1.148		0.763		1.200	1.236	1.220	0.915	0.679	0.750	0.953	0.764	0.941		1.124		1.268
P08865	43	S	40S ribosomal protein SA	RPSA	0.999781	1.87E-04	77.324	RKS(1)DGIYIINLK	3	-0.20151	6	1.381	0.792	0.712	1.015	1.086	1.016	0.843	0.851	0.888	1.081	1.253	1.083	1.638	0.931	0.802	0.939	0.867	0.938	0.814	4.68E-01
P09651	6	S	Heterogeneous nuclear ribonucleoprotein A1	HNRNPA1	1	2.35E-41	197.69	S(1)ES(1)PKEPEQLR	3	-0.19588	153	1.304	1.161	0.871	1.004	0.779	0.881	1.048	0.994	1.035	0.992	0.949	0.982	1.244	1.168	0.842	1.012	0.821	0.897	0.839	2.67E-01
P09651	4	S	Heterogeneous nuclear ribonucleoprotein A1	HNRNPA1	1	2.35E-41	197.69	S(1)ES(1)PKEPEQLR	3	-0.19588	33	1.085	1.117	0.808	0.684	1.695	0.611	1.048	0.994	1.035	0.992	0.949	0.982	1.035	1.124	0.781	0.690	1.786	0.622	1.054	8.99E-01
P09651	363	S	Heterogeneous nuclear ribonucleoprotein A1	HNRNPA1	0.822102	9.54E-35	155.86	NQGGYGGSS(0.001)S(0.029)S(0.822)S(0.118)S(0.029)YGSGR	2	-1.1193	4		0.86	1.109		1.031		1.048	0.994	1.035	0.992	0.949	0.982		0.865	1.071		1.086		1.122
P09651	362	S	Heterogeneous nuclear ribonucleoprotein A1	HNRNPA1	0.782616	4.00E-26	149.44	NQGGYGGS(0.006)S(0.036)S(0.783)S(0.128)S(0.036)S(0.01)YGS(0.001)GR	2	0.6253	4	1.2			0.958	0.842		1.048	0.994	1.035	0.992	0.949	0.982	1.145			0.966	0.887		0.809
P09651	2	S	Heterogeneous nuclear ribonucleoprotein A1	HNRNPA1	0.980628	1.47E-27	157.42	S(0.981)KS(0.049)ES(0.97)PKEPEQLR	2	2.4528	19	0.981	1.104		0.763	0.975	1.177	1.048	0.994	1.035	0.992	0.949	0.982	0.936	1.111		0.769	1.027	1.199	0.976	8.95E-01
P0C1Z6	180	S	TCF3 fusion partner	TFPT	0.999999	1.53E-27	153.56	TPAPPEPGS(1)PAPGEGPSGR	2	1.6466	12	1.036	1.446	1.005	0.671	1.232	0.609						1.000						0.609
P0C1Z6	252	S	TCF3 fusion partner	TFPT	0.999999	3.55E-05	86.497	LLPYPTLAS(1)PAS(1)D	2	0.76475	13	1.166	0.915	0.898	1.106	0.923	0.992						1.000						0.992
P0C1Z6	249	S	TCF3 fusion partner	TFPT	0.999851	3.55E-05	86.497	LLPYPTLAS(1)PAS(1)D	2	0.76475	2	1.504	0.946	0.66	1.004	0.806	1.079						1.000						1.079
P0C1Z6	167	S	TCF3 fusion partner	TFPT	0.999967	4.39E-03	80.219	ETLS(1)PPR	2	-0.75227	21	0.918	0.898	1.066	0.814	1.338	0.966						1.000						0.966
P0C7T5	284	S	Ataxin-1-like	ATXN1L	0.999959	1.37E-36	181.86	RES(1)EALDSPNSK	2	0.8235	5	0.825	1.021	0.952	1.383		0.82
P10071	664	S	Transcriptional activator GLI3	GLI3	0.979063	1.25E-14	100.17	S(0.979)PGRPT(0.021)QGALGEQQDLSNTTSK	3	1.5528	3		1.202			1.148	0.65
P10075	86	S	Zinc finger protein GLI4	GLI4	0.99989	4.50E-42	171.04	S(1)PGSQAPDEGAGGALR	2	-0.42118	8	0.983	0.72	0.874	1.223	0.952	1.248
P10244	266	T	Myb-related protein B	MYBL2	0.994425	1.26E-06	63.138	EQEPIGT(0.006)DLDAVRT(0.994)PEPLEEFPK	3	0.43117	2	0.741	0.812	0.507	1.364	1.144	1.432
P10301	201	S	Ras-related protein R-Ras	RRAS	0.991006	4.88E-05	71.842	KYQEQELPPS(0.991)PPS(0.009)APR	3	0.49348	6		0.346	0.746		1.208	1.7	1.352	1.339	1.236	0.751	0.683	0.639		0.258	0.604		1.769	2.660	5.138	6.49E-02
P10412	18	T	Histone H1.4	HIST1H1E	1	1.87E-17	116.2	SETAPAAPAAPAPAEKT(1)PVKK	3	-0.29725	70	2.071	0.741	1.394	0.722	0.592	0.48	0.997		1.023	1.097	0.833	1.050	2.077		1.363	0.658	0.711	0.457	0.354	2.98E-02
P10412	36	S	Histone H1.4	HIST1H1E	1	1.67E-14	132.74	KAS(1)GPPVSELITK	2	-0.076989	13	0.974	0.735	0.924	1.201	0.954	1.213	0.997		1.023	1.097	0.833	1.050	0.977		0.903	1.095	1.145	1.155	1.204	1.35E-02
P10644	83	S	cAMP-dependent protein kinase type I-alpha regulatory subunit	PRKAR1A	1	5.61E-07	102.65	EDEIS(1)PPPPNPVVK	3	0.78933	42	0.943	1.119	0.892	1.099	1.142	0.806	1.010	1.004	1.008	0.993	1.017	0.968	0.934	1.115	0.885	1.107	1.123	0.833	1.044	7.32E-01
P10696	111	S	Alkaline phosphatase, placental-like	ALPPL2	0.994813	4.41E-07	84.249	HVPDS(0.995)GAT(0.005)ATAYLCGVK	3	-0.71484	11	1.208	0.941	0.939	0.926	0.986
P10809	70	S	60 kDa heat shock protein, mitochondrial	HSPD1	0.999988	8.38E-25	171.08	TVIIEQSWGS(1)PK	2	0.10478	11	1.333	0.978	1.084	0.891	0.824	0.89	0.999	0.990	0.994	1.019	0.988	1.010	1.334	0.988	1.091	0.874	0.834	0.881	0.759	5.74E-02
P11137	1782	S	Microtubule-associated protein 2	MAP2	0.997959	4.32E-10	113.33	VDHGAEIIT(0.002)QS(0.998)PGR	2	0.37424	3		0.944	1.224	1.071	0.762
P11171	188	S	Protein 4.1	EPB41	0.999669	8.45E-12	150.9	IEVKEES(1)PQSK	2	-0.72072	4	0.775	2.016	0.853	0.647	0.886	0.824	1.039	0.962	0.887	0.943	1.125	1.044	0.746	2.096	0.962	0.686	0.788	0.789	0.595	2.89E-01
P11229	457	S	Muscarinic acetylcholine receptor M1	CHRM1	0.989354	6.18E-02	40.377	PGS(0.019)VHRT(0.992)PS(0.989)R	2	2.6633	1		0.709	0.724	1.013	1.546	1.008
P11229	455	T	Muscarinic acetylcholine receptor M1	CHRM1	0.991503	6.18E-02	40.377	PGS(0.019)VHRT(0.992)PS(0.989)R	2	2.6633	1		0.709	0.724	1.013	1.546	1.008
P11274	354	S	Breakpoint cluster region protein	BCR	0.999959	3.09E-05	109.16	VS(1)PSPTTYR	2	0.31339	4		1.024	1.081	0.949	1.211	0.736	1.222		0.885	1.342	0.804	0.746			1.221	0.707	1.506	0.987	0.873
P11274	459	S	Breakpoint cluster region protein	BCR	0.993847	1.19E-30	141.48	HQDGLPYIDDS(0.994)PS(0.005)S(0.001)SPHLSSK	3	-0.77591	13	1.306	0.997	0.871	0.871	1.103	0.853	1.222		0.885	1.342	0.804	0.746	1.069		0.984	0.649	1.372	1.143	1.028	9.25E-01
P11274	122	S	Breakpoint cluster region protein	BCR	1	2.23E-11	58.867	PQPAPADGADPPPAEEPEARPDGEGS(1)PGK	3	-0.37136	8	1.127	1.242	1.019	0.612			1.222		0.885	1.342	0.804	0.746	0.922		1.151	0.456			0.440
P11387	10	S	DNA topoisomerase 1	TOP1	0.99997	7.39E-06	85.855	SGDHLHNDS(1)QIEADFR	3	-1.099	1	0.432	0.32		1.502	1.284	1.462	1.045	1.067	1.080	0.933	0.898	0.977	0.413	0.300		1.610	1.430	1.496	4.240	7.18E-04
P11388	1377	S	DNA topoisomerase 2-alpha	TOP2A	0.999883	8.18E-06	94.339	SVVS(1)DLEADDVK	2	0.025481	5	1.572	0.963	0.671	1.162	0.803	0.829	1.111	1.104	1.063	0.874	0.879	0.969	1.415	0.872	0.631	1.330	0.914	0.856	1.062	8.38E-01
P11388	1354	S	DNA topoisomerase 2-alpha	TOP2A	0.999847	1.21E-05	92.474	TDDEDFVPS(1)DAS(1)PPK	2	-0.15822	4	1.286	1.072	1.41	0.538	0.658	1.036	1.111	1.104	1.063	0.874	0.879	0.969	1.158	0.971	1.326	0.616	0.749	1.069	0.704	1.15E-01
P11388	1213	S	DNA topoisomerase 2-alpha	TOP2A	0.999969	5.48E-03	53.008	TQMAEVLPS(1)PR	2	-0.62342	4	1.24	1.133	1.086	0.818	0.967	0.755	1.111	1.104	1.063	0.874	0.879	0.969	1.116	1.026	1.022	0.936	1.100	0.779	0.890	3.00E-01
P11388	1351	S	DNA topoisomerase 2-alpha	TOP2A	0.999784	4.41E-03	45.844	TDDEDFVPS(1)DAS(1)PPK	2	-0.15822	2	1.091		0.948	1.142		0.818	1.111	1.104	1.063	0.874	0.879	0.969	0.982		0.892	1.307		0.844	1.148	6.16E-01
P11388	1295	S	DNA topoisomerase 2-alpha	TOP2A	0.939262	3.68E-02	49.298	NPWS(0.939)DS(0.046)ES(0.015)DR	2	0.20241	2	1.228	1	1.141	0.835	1.072	0.722	1.111	1.104	1.063	0.874	0.879	0.969	1.105	0.906	1.073	0.955	1.220	0.745	0.947	7.34E-01
P11388	1247	S	DNA topoisomerase 2-alpha	TOP2A	0.999978	3.37E-23	131.27	IKNENTEGS(1)PQEDGVELEGLK	3	1.5934	17	1.41	1.338	1.03	0.689	0.989	0.544	1.111	1.104	1.063	0.874	0.879	0.969	1.269	1.212	0.969	0.788	1.125	0.561	0.717	1.59E-01
P11388	1474	S	DNA topoisomerase 2-alpha	TOP2A	0.999966	9.18E-59	216.81	KPSTSDDS(1)DSNFEK	2	0.62949	18	0.599	1.147	1.222	1.097	0.969	0.966	1.111	1.104	1.063	0.874	0.879	0.969	0.539	1.039	1.150	1.255	1.102	0.997	1.230	3.60E-01
P11388	1106	S	DNA topoisomerase 2-alpha	TOP2A	1	3.28E-59	196.36	VPDEEENEES(1)DNEK	2	-0.25745	37	1.164	1.179	0.91	0.8	0.885	1.061	1.111	1.104	1.063	0.874	0.879	0.969	1.048	1.068	0.856	0.915	1.007	1.095	1.015	8.68E-01
P11388	1525	S	DNA topoisomerase 2-alpha	TOP2A	0.99997	1.18E-02	49.28	YLEES(1)DEDDLF	2	0.055197	2		0.981			1.08	0.939	1.111	1.104	1.063	0.874	0.879	0.969		0.889			1.229	0.969	1.237
P11717	2409	S	Cation-independent mannose-6-phosphate receptor	IGF2R	0.998568	2.62E-18	104.96	ALS(0.001)S(0.001)LHGDDQDS(0.999)EDEVLTIPEVK	3	-0.39712	23	1.562	0.916	1.041	0.867	0.82	0.794	1.140	1.062	1.065	0.901	0.912	0.921	1.370	0.863	0.977	0.962	0.899	0.862	0.848	3.58E-01
P11717	2484	S	Cation-independent mannose-6-phosphate receptor	IGF2R	1	1.04E-22	143.46	LVSFHDDS(1)DEDLLHI	2	-0.5091	30	1.199	1.004	0.918	1.004	0.914	0.961	1.140	1.062	1.065	0.901	0.912	0.921	1.052	0.945	0.862	1.114	1.002	1.043	1.105	1.92E-01
P12268	160	S	Inosine-5'-monophosphate dehydrogenase 2	IMPDH2	0.969739	8.60E-04	110.54	LVGIIS(0.03)S(0.97)R	2	0.20945	6		0.717		1.223	0.991	1.068	0.934	0.937	0.979	1.074	0.967	1.109		0.765		1.139	1.025	0.963	1.362
P12268	122	S	Inosine-5'-monophosphate dehydrogenase 2	IMPDH2	0.999997	1.39E-05	81.119	KYEQGFITDPVVLS(1)PK	3	-0.094699	6	1.129	0.706	1.187	0.846	1.051	1.082	0.934	0.937	0.979	1.074	0.967	1.109	1.209	0.753	1.212	0.788	1.087	0.976	0.898	5.71E-01
P12270	379	S	Nucleoprotein TPR	TPR	0.970061	2.28E-06	59.359	GAILS(0.004)EEELAAMS(0.97)PT(0.026)AAAVAK	3	1.5485	8	1.212	0.918	0.896	1.167	0.972	0.835	1.115	1.095	1.115	0.871	0.898	0.907	1.087	0.838	0.804	1.340	1.082	0.921	1.225	2.47E-01
P12694	337	S	2-oxoisovalerate dehydrogenase subunit alpha, mitochondrial	BCKDHA	0.994713	8.50E-60	221.78	IGHHS(0.995)T(0.005)SDDSSAYR	3	-0.22127	9	1.33	1.1	1.166	0.646	1.113	0.645	1.217	0.949	1.150	0.851	0.907	0.927	1.093	1.159	1.014	0.759	1.227	0.696	0.821	3.23E-01
P12694	338	T	2-oxoisovalerate dehydrogenase subunit alpha, mitochondrial	BCKDHA	0.881954	2.64E-39	189.91	IGHHS(0.114)T(0.882)S(0.004)DDSSAYR	2	0.40091	2	1.197		1.456			0.347	1.217	0.949	1.150	0.851	0.907	0.927	0.984		1.266			0.374	0.333
P12694	347	S	2-oxoisovalerate dehydrogenase subunit alpha, mitochondrial	BCKDHA	1	8.83E-11	143.55	S(1)VDEVNYWDK	2	0.22899	11	1.181	0.996	0.868	0.909	1.046	1	1.217	0.949	1.150	0.851	0.907	0.927	0.970	1.050	0.755	1.068	1.153	1.079	1.189	1.30E-01
P12755	432	S	Ski oncogene	SKI	0.789507	3.47E-04	70.41	VVS(0.21)S(0.79)PPCAAAVS(0.001)R	2	0.25399	3	1.133	1.21	0.79	0.91	1.165	0.793	1.203	0.920	1.195	0.787	0.978	0.918	0.942	1.315	0.661	1.156	1.191	0.864	1.100	6.74E-01
P12931	17	S	Proto-oncogene tyrosine-protein kinase Src	SRC	1	8.25E-40	148.45	S(1)LEPAENVHGAGGGAFPASQTPSKPASADGHR	4	-0.22594	56	1.127	1.171	0.963	1.086	0.818	0.835	1.027	1.211	1.118	0.871	0.905	0.868	1.097	0.967	0.861	1.247	0.904	0.962	1.064	6.47E-01
P12956	455	T	X-ray repair cross-complementing protein 6	XRCC6	1	6.62E-03	72.29	IMAT(1)PEQVGK	2	-0.077926	4	1.084		0.933			0.983	1.082	1.083	1.081	0.952	0.901	0.901	1.002		0.863			1.091	1.170
P13051	23	S	Uracil-DNA glycosylase	UNG	0.999917	2.80E-12	67.345	HAPS(1)PEPAVQGTGVAGVPEESGDAAAIPAK	3	0.47357	2		0.973	1.242		0.795	0.99	0.945	0.929	0.933	1.142	0.999	1.052		1.047	1.331		0.796	0.941	0.730	1.82E-01
P13639	502	S	Elongation factor 2	EEF2	0.999998	8.69E-04	123.86	FSVS(1)PVVR	2	0.12243	6	0.906	1.152	0.893	1.044	1.117	0.888	0.929	0.954	0.949	1.022	1.081	1.066	0.975	1.208	0.941	1.022	1.033	0.833	0.924	4.99E-01
P13639	435	T	Elongation factor 2	EEF2	0.999977	1.08E-03	65.043	IMGPNYT(1)PGKK	3	0.29497	6	0.849	1.162	0.817	1.249	0.653	1.271	0.929	0.954	0.949	1.022	1.081	1.066	0.914	1.218	0.861	1.222	0.604	1.192	1.009	9.72E-01
P13796	257	S	Plastin-2	LCP1	1	2.02E-05	100.38	EGES(1)LEDLMK	2	-0.95162	9	1.97	1.164	0.926	0.838	0.477	0.624	1.003	0.996	1.002	0.957	1.047	0.996	1.964	1.169	0.924	0.876	0.456	0.627	0.483	1.06E-01
P13796	5	S	Plastin-2	LCP1	0.993819	6.64E-04	69.261	GS(0.994)VS(0.006)DEEMMELR	2	-0.39265	8	1.092	0.761	1.018	1.249	0.769	1.111	1.003	0.996	1.002	0.957	1.047	0.996	1.089	0.764	1.016	1.305	0.734	1.115	1.100	6.49E-01
P13807	653	S	Glycogen [starch] synthase, muscle	GYS1	0.884787	2.13E-33	176.26	HS(0.115)S(0.885)PHQSEDEEDPR	3	-0.15957	13	2.004	0.509	1.028	0.759	0.778	0.923		1.102	0.817		0.998	1.083		0.462	1.258		0.780	0.852	0.949	9.22E-01
P13861	99	S	cAMP-dependent protein kinase type II-alpha regulatory subunit	PRKAR2A	0.999959	3.01E-13	97.295	RVS(1)VCAETYNPDEEEEDTDPR	3	-0.50293	6	0.634		0.805	1.188	1.102	1.271	1.028	1.011	1.005	1.005	1.036	0.914	0.617		0.801	1.182	1.064	1.391	1.710	3.77E-02
P13861	80	S	cAMP-dependent protein kinase type II-alpha regulatory subunit	PRKAR2A	1	1.44E-46	182.15	VADAKGDS(1)ES(1)EEDEDLEVPVPSR	2	0.0098204	60	0.815	0.915	0.884	1.202	1.104	1.08	1.028	1.011	1.005	1.005	1.036	0.914	0.793	0.905	0.880	1.196	1.066	1.182	1.336	5.70E-03
P13861	78	S	cAMP-dependent protein kinase type II-alpha regulatory subunit	PRKAR2A	1	8.50E-46	167.63	VADAKGDS(1)ES(1)EEDEDLEVPVPSR	2	0.0098204	57	0.811	0.984	0.855	1.219	1.117	1.013	1.028	1.011	1.005	1.005	1.036	0.914	0.789	0.973	0.851	1.213	1.078	1.108	1.301	1.81E-02
P13994	362	S	Coiled-coil domain-containing protein 130	CCDC130	0.959943	6.86E-09	69.639	QDKPLS(0.96)PAGS(0.031)S(0.009)QEAADTPDTR	3	-0.49925	1	0.882		0.982			1.136
P13994	332	S	Coiled-coil domain-containing protein 130	CCDC130	0.997192	1.27E-05	49.152	VPEEAAQDRPMS(0.997)PGDCPPET(0.002)T(0.001)ETPK	3	-0.15792	1	0.99					1.01
P14618	37	S	Pyruvate kinase PKM	PKM	0.999997	1.94E-14	156.6	LDIDS(1)PPITAR	2	-0.31102	12	1.002	0.812	1.027	1.258	0.935	0.966	0.933	0.918	0.947	1.067	1.050	1.085	1.074	0.885	1.084	1.179	0.890	0.890	0.973	8.23E-01
P14625	306	S	Endoplasmin	HSP90B1	1	4.32E-11	84.327	EEKEES(1)DDEAAVEEEEEEK	3	0.35913	5	0.87		1.099	1.295	0.955	0.781	1.074	1.049	1.031	0.957	0.946	0.944	0.810		1.066	1.353	1.010	0.827	1.134	6.10E-01
P14859	448	S	POU domain, class 2, transcription factor 1	POU2F1	0.931115	6.41E-07	96.562	INPPSS(0.002)GGT(0.006)S(0.004)S(0.057)S(0.931)PIK	2	0.74717	4			0.92			1.08	0.744	0.803	0.871	1.202	1.203	1.177			1.056			0.918	0.869
P14866	52	S	Heterogeneous nuclear ribonucleoprotein L	HNRNPL	0.999201	7.52E-03	53.557	Y(0.001)YGGGS(0.999)EGGR	2	-0.51189	3		0.968	0.882			1.15	1.004	1.068	1.055	0.920	0.962	0.991		0.906	0.836			1.160	1.332
P14866	185	S	Heterogeneous nuclear ribonucleoprotein L	HNRNPL	0.973726	1.48E-08	122.01	ISRPGDS(0.974)DDS(0.026)R	2	0.33436	6	0.863		1.247	0.89			1.004	1.068	1.055	0.920	0.962	0.991	0.860		1.182	0.967			0.948
P14866	101	S	Heterogeneous nuclear ribonucleoprotein L	HNRNPL	0.999985	4.02E-10	138.89	TPAS(1)PVVHIR	2	-0.39148	9	1.298	1.052	0.777	1.072	0.769	1.031	1.004	1.068	1.055	0.920	0.962	0.991	1.293	0.985	0.736	1.165	0.799	1.040	0.997	9.88E-01
P14923	182	S	Junction plakoglobin	JUP	1	2.55E-07	107.82	ALMGS(1)PQLVAAVVR	3	-0.40187	7	1.66	1.046	0.934	0.81	0.753	0.797	0.928	0.915	0.968	1.107	1.081	1.001	1.789	1.143	0.965	0.732	0.697	0.796	0.571	9.14E-02
P15056	151	S	Serine/threonine-protein kinase B-raf	BRAF	0.995555	1.83E-04	77.431	S(0.004)NPKS(0.996)PQKPIVR	3	-0.17526	3	0.664		0.67	1.158	1.535	0.973
P15056	729	S	Serine/threonine-protein kinase B-raf	BRAF	0.999803	4.61E-04	87.667	SAS(1)EPSLNR	2	-0.60294	4	0.918	1.256	0.788	0.902	1.006	1.129
P15336	69	T	Cyclic AMP-dependent transcription factor ATF-2	ATF2	0.927039	1.42E-02	42.863	NDS(0.001)VIVADQT(0.927)PT(0.779)PT(0.293)R	2	2.0662	1	0.805		0.701	0.916	1.117	1.461		1.000
P15336	112	S	Cyclic AMP-dependent transcription factor ATF-2	ATF2	0.999999	4.63E-33	174.18	MPLDLS(1)PLATPIIR	2	0.6258	24	0.331	0.604	0.471	0.612	0.63	3.352		1.000						0.604
P15336	71	T	Cyclic AMP-dependent transcription factor ATF-2	ATF2	0.950717	6.80E-15	128.39	NDSVIVADQT(0.01)PT(0.951)PT(0.039)R	2	0.0080662	4	0.583		0.682	1.17	1.11	1.456		1.000
P15336	328	S	Cyclic AMP-dependent transcription factor ATF-2	ATF2	0.860295	1.25E-18	68.785	TQSEESRPQSLQQPAT(0.024)S(0.024)T(0.024)T(0.024)ET(0.024)PAS(0.86)PAHT(0.012)T(0.005)PQT(0.001)QSTSGR	4	0.031678	3			1.115	0.612	1.273			1.000
P15336	266	S	Cyclic AMP-dependent transcription factor ATF-2	ATF2	0.94263	2.14E-19	102.28	PVTMVPSVPGIPGPS(0.057)S(0.943)PQPVQSEAK	3	-0.63871	5	0.553		0.554	1.407		1.486		1.000
P15407	74	S	Fos-related antigen 1	FOSL1	1	8.92E-33	176.25	PLTYPQYS(1)PPQPR	2	-0.042135	22	1.163	1.134	1.362	0.797	0.817	0.728	1.068	1.221	1.152	0.639	1.057	0.864	1.089	0.929	1.182	1.247	0.773	0.843	0.895	5.34E-01
P15407	191	S	Fos-related antigen 1	FOSL1	0.923675	3.41E-09	98.443	EGDT(0.026)GS(0.004)T(0.003)S(0.001)GT(0.002)S(0.042)S(0.924)PPAPCR	2	-0.46552	5	0.687	1.661	0.956	0.695			1.068	1.221	1.152	0.639	1.057	0.864	0.643	1.360	0.830	1.088			1.152
P15407	101	S	Fos-related antigen 1	FOSL1	1	3.45E-21	147.09	RRPCEQIS(1)PEEEER	3	2.5423	15	1.152			0.904	1.278	0.666	1.068	1.221	1.152	0.639	1.057	0.864	1.079			1.415	1.209	0.771	1.049
P15408	200	S	Fos-related antigen 2	FOSL2	1	1.11E-11	147.24	S(1)PPAPGLQPMR	3	0.6722	18	1.223	0.645	0.897	1.146	0.931	1.158
P15408	120	S	Fos-related antigen 2	FOSL2	1	1.63E-04	76.051	RRDEQLS(1)PEEEEK	3	0.41847	4	0.888		0.97	0.808	1.465	0.868
P15408	230	S	Fos-related antigen 2	FOSL2	0.947271	3.65E-09	97.57	QEPLEEDS(0.947)PS(0.04)S(0.01)S(0.002)S(0.001)AGLDK	2	2.6481	5		0.876	0.704	1.428	0.962	1.03
P15822	2327	S	Zinc finger protein 40	HIVEP1	0.870924	8.23E-04	66.568	AVAIT(0.007)QS(0.871)PS(0.092)S(0.03)VR	2	1.075	1	1.489				0.688	0.823
P15822	2599	S	Zinc finger protein 40	HIVEP1	0.989869	1.91E-03	61.444	T(0.01)ES(0.99)PQGLPTVQR	2	1.4843	1	1.035	1.246	0.778		0.941
P15880	264	S	40S ribosomal protein S2	RPS2	0.998573	2.17E-03	58.98	S(0.999)PY(0.001)QEFTDHLVK	2	2.7296	3			1.139	0.934		0.927	0.860	0.844	0.932	1.086	1.123	1.155			1.222	0.860		0.803	0.680
P15924	2207	S	Desmoplakin	DSP	0.991416	5.65E-03	67.032	S(0.991)MS(0.009)FQGIR	2	-0.18506	5	1.355	1.276		1.144	0.614	0.611	0.817	0.834	0.831	1.184	1.162	1.172	1.659	1.530		0.966	0.528	0.521	0.422	1.81E-02
P15924	176	S	Desmoplakin	DSP	0.981683	1.37E-19	139.11	GGGGYTCQS(0.982)GS(0.018)GWDEFTK	2	-0.88354	12	1.002	0.743	0.773		1.061	1.421	0.817	0.834	0.831	1.184	1.162	1.172	1.226	0.891	0.930		0.913	1.212	1.046	8.08E-01
P15924	22	S	Desmoplakin	DSP	1	7.61E-05	132.22	AES(1)GPDLR	2	0.82848	9	0.631	0.753	0.694	1.254	1.372	1.296	0.817	0.834	0.831	1.184	1.162	1.172	0.772	0.903	0.835	1.059	1.181	1.106	1.333	5.76E-03
P15924	2024	S	Desmoplakin	DSP	0.753144	3.55E-05	87.767	GAGSIAGAS(0.247)AS(0.753)PK	2	1.6302	2		0.841			1.159		0.817	0.834	0.831	1.184	1.162	1.172		1.008			0.997		0.989
P15924	2815	S	Desmoplakin	DSP	0.983086	2.06E-10	112.34	GLPS(0.983)PYNMS(0.014)S(0.002)APGS(0.001)R	2	-2.1243	5	1.036		0.688		1.276		0.817	0.834	0.831	1.184	1.162	1.172	1.268		0.828		1.098		1.048
P15924	2608	S	Desmoplakin	DSP	0.871713	1.20E-23	116.96	S(0.535)S(0.538)S(0.872)FS(0.045)DT(0.011)LEESSPIAAIFDTENLEK	3	-0.057003	21	1.251	0.769	0.371	1.575	1.123	0.911	0.817	0.834	0.831	1.184	1.162	1.172	1.531	0.922	0.446	1.330	0.966	0.777	1.060	8.77E-01
P16070	718	S	CD44 antigen	CD44	0.797289	1.67E-07	102.64	ES(0.02)S(0.797)ET(0.183)PDQFMTADETR	2	0.48283	3	1.429	0.995	0.82	0.83	0.972	0.955	1.039	1.073	1.045	0.974	0.878	0.992	1.375	0.927	0.785	0.852	1.107	0.963	0.946	7.89E-01
P16070	720	T	CD44 antigen	CD44	0.801983	4.39E-05	90.453	ES(0.03)S(0.168)ET(0.802)PDQFMTADETR	2	0.21588	2			0.879			1.121	1.039	1.073	1.045	0.974	0.878	0.992			0.841			1.130	1.343
P16070	706	S	CD44 antigen	CD44	1	3.32E-25	194.51	S(1)QEMVHLVNK	2	-0.1197	144	1.31	1.049	0.827	1.063	0.749	1.002	1.039	1.073	1.045	0.974	0.878	0.992	1.261	0.978	0.791	1.091	0.853	1.010	0.975	8.78E-01
P16104	140	S	Histone H2AX	H2AFX	0.999872	4.15E-03	108.26	ATQAS(1)QEY	1	-0.14718	6	0.657	0.698	0.82	1.29	1.214	1.32	1.099	1.210	1.048	0.911	0.873	0.859	0.598	0.577	0.782	1.416	1.391	1.537	2.219	5.57E-04
P16144	1069	S	Integrin beta-4	ITGB4	1	4.81E-15	138.01	LLELQEVDS(1)LLR	2	0.94541	7	1.823	1.001	0.623	0.991	0.66	0.903	0.982	0.978	1.014	1.003	0.985	1.037	1.856	1.024	0.614	0.988	0.670	0.871	0.724	4.41E-01
P16144	1494	S	Integrin beta-4	ITGB4	0.996343	3.19E-03	102.62	DYNS(0.996)LT(0.004)R	2	-0.37756	4	0.56	0.634	0.571	1.337	1.739	1.159	0.982	0.978	1.014	1.003	0.985	1.037	0.570	0.648	0.563	1.333	1.765	1.118	2.366	1.35E-02
P16144	1530	T	Integrin beta-4	ITGB4	0.991813	3.51E-18	169.52	LTAGVPDT(0.992)PT(0.008)R	2	0.19155	15	1.28	0.891	1.211	0.869	0.855	0.894	0.982	0.978	1.014	1.003	0.985	1.037	1.303	0.911	1.194	0.866	0.868	0.862	0.762	8.16E-02
P16144	1474	S	Integrin beta-4	ITGB4	0.988658	5.36E-17	112.47	MTTTSAAAYGT(0.011)HLS(0.989)PHVPHR	4	-0.14638	21	0.541	0.368	0.485	2.259	1.126	1.222	0.982	0.978	1.014	1.003	0.985	1.037	0.551	0.376	0.478	2.252	1.143	1.178	3.254	4.53E-02
P16144	1518	S	Integrin beta-4	ITGB4	0.946095	2.88E-22	150.01	DYSTLTSVS(0.034)S(0.946)HDS(0.02)R	2	1.0573	8	0.333			1.368	1.478	0.821	0.982	0.978	1.014	1.003	0.985	1.037	0.339			1.364	1.501	0.792	3.594
P16144	1547	S	Integrin beta-4	ITGB4	1	3.14E-03	99.855	VS(1)WQEPR	2	-0.042201	3	1.237	1.134	1.473	0.645	0.511		0.982	0.978	1.014	1.003	0.985	1.037	1.260	1.160	1.453	0.643	0.519		0.450	9.73E-03
P16144	1696	S	Integrin beta-4	ITGB4	0.991942	1.23E-03	77.813	VDGDS(0.992)PES(0.008)R	2	-0.48569	2	0.976		0.977		1.026	1.02	0.982	0.978	1.014	1.003	0.985	1.037	0.994		0.964		1.042	0.984	1.035	4.09E-01
P16144	1532	T	Integrin beta-4	ITGB4	0.781832	1.38E-02	65.234	LTAGVPDT(0.218)PT(0.782)R	1	1.182	2		0.865	1.216		0.919		0.982	0.978	1.014	1.003	0.985	1.037		0.884	1.199		0.933		0.896
P16383	97	T	GC-rich sequence DNA-binding factor 2	GCFC2	0.998869	9.25E-19	128.59	T(0.007)LDVS(0.994)T(0.999)DEEDKIHHSSESK	3	-0.54412	15	1.002	0.667	1.247	1.134	1.108	0.842			0.928		1.072				1.344		1.034		0.769
P16383	19	S	GC-rich sequence DNA-binding factor 2	GCFC2	0.968521	1.09E-39	155.17	AADS(0.001)S(0.03)DS(0.969)DGAEESPAEPGAPR	2	-0.59617	8		1.202		0.907	1.005	0.886			0.928		1.072						0.938
P16383	96	S	GC-rich sequence DNA-binding factor 2	GCFC2	0.996395	9.25E-19	128.59	T(0.006)LDVS(0.996)T(0.995)DEEDKIHHS(0.002)S(0.001)ESK	3	-0.33379	15	1.002	0.667	1.247	1.134	1.108	0.842			0.928		1.072				1.344		1.034		0.769
P16401	18	S	Histone H1.5	HIST1H1B	1	1.00E-39	157.55	SETAPAETATPAPVEKS(1)PAK	3	-0.38145	69	0.7	1.233	0.993	0.975	1.211	0.888	0.841	0.935	0.917	1.144	1.055	1.107	0.832	1.319	1.083	0.852	1.148	0.802	0.867	4.62E-01
P16401	2	S	Histone H1.5	HIST1H1B	0.938994	1.04E-07	101.54	S(0.939)ET(0.061)APAETATPAPVEK	2	0.53691	3	0.673	0.478	1.461	0.409	1.7	1.279	0.841	0.935	0.917	1.144	1.055	1.107	0.800	0.511	1.593	0.358	1.611	1.155	1.076	8.88E-01
P16403	2	S	Histone H1.2	HIST1H1C	0.810404	7.08E-06	86.748	S(0.81)ET(0.19)APAAPAAAPPAEK	2	0.54067	14	0.956	0.814	1.055	1.094	0.939	1.141	0.931	0.978	1.069	0.992	1.008	1.024	1.027	0.832	0.987	1.103	0.932	1.114	1.106	2.95E-01
P16615	663	S	Sarcoplasmic/endoplasmic reticulum calcium ATPase 2	ATP2A2	1	4.66E-03	65.467	EFDELNPS(1)AQR	2	1.3296	1		0.811	1.265	1.03	0.903	0.991	1.029	1.061	1.034	0.932	0.969	0.976		0.764	1.223	1.105	0.932	1.015	1.024	9.06E-01
P16949	38	S	Stathmin	STMN1	1	2.98E-14	127.36	ESVPEFPLS(1)PPK	2	0.51046	60	0.867	0.686	0.775	1.438	1.038	1.195	1.014	0.915	0.910	1.065	1.007	1.091	0.855	0.750	0.852	1.350	1.031	1.095	1.415	3.03E-02
P16949	25	S	Stathmin	STMN1	1	1.74E-15	137.52	RAS(1)GQAFELILS(1)PR	3	0.35366	75	1.011	0.913	0.766	1.181	1.117	1.012	1.014	0.915	0.910	1.065	1.007	1.091	0.997	0.998	0.842	1.109	1.109	0.928	1.109	2.66E-01
P16949	63	S	Stathmin	STMN1	1	1.70E-13	162.32	S(1)HEAEVLK	2	-0.0531	21		1.655	1.038	0.723	0.471	1.113	1.014	0.915	0.910	1.065	1.007	1.091		1.809	1.141	0.679	0.468	1.020	0.490	1.03E-01
P16949	16	S	Stathmin	STMN1	1	9.97E-08	95.122	RAS(1)GQAFELILS(1)PR	3	0.35366	26	1.166	1.1	0.486	1.04	0.998	1.21	1.014	0.915	0.910	1.065	1.007	1.091	1.150	1.202	0.534	0.977	0.991	1.109	1.066	7.86E-01
P17029	13	S	Zinc finger protein with KRAB and SCAN domains 1	ZKSCAN1	0.999775	5.50E-15	132.15	EATGLS(1)PQAAQEK	2	1.5946	5	0.815	1.112	1.207	0.804	1.288	0.773
P17096	44	S	High mobility group protein HMG-I/HMG-Y	HMGA1	0.991258	2.48E-12	81.197	KQPPVSPGT(0.001)ALVGS(0.991)QKEPS(0.007)EVPT(0.001)PK	4	0.95669	5		0.682	0.489	1.24	1.478	1.11	0.905	1.043	0.940	1.026	1.014	1.072		0.654	0.520	1.209	1.458	1.035	2.102	2.99E-02
P17275	259	S	Transcription factor jun-B	JUNB	1	2.70E-08	108.71	DAT(1)PPVS(1)PINMEDQER	3	-0.56292	24	1.186	1.039	1.053	1.028	0.844	0.851	1.121	1.222	0.993	0.843	0.911	0.911	1.058	0.850	1.060	1.219	0.926	0.934	1.038	7.70E-01
P17275	255	T	Transcription factor jun-B	JUNB	1	2.89E-10	119	DAT(1)PPVS(1)PINMEDQER	3	-0.56292	12	0.597	0.619	2.266	1.722	0.41	0.386	1.121	1.222	0.993	0.843	0.911	0.911	0.533	0.507	2.282	2.043	0.450	0.424	0.878	8.73E-01
P17302	255	S	Gap junction alpha-1 protein	GJA1	0.975446	4.17E-04	59.163	SDPYHAT(0.002)S(0.022)GALS(0.975)PAK	3	-0.0044056	2		0.621			1.379
P17480	484	S	Nucleolar transcription factor 1	UBTF	1	2.95E-04	110.84	LPES(1)PKR	2	0.95926	19	1.128	0.777	0.785	1.136	1.166	1.008	0.949	0.957	1.037	1.038	0.981	1.038	1.189	0.812	0.757	1.094	1.189	0.971	1.180	3.30E-01
P17535	90	S	Transcription factor jun-D	JUND	0.999418	6.17E-05	47.175	ADGAPS(0.001)AAPPDGLLAS(0.999)PDLGLLK	3	-1.1331	4		0.489		1.001	0.857	1.653	0.780	0.845	0.811	1.181	1.251	1.132		0.579		0.848	0.685	1.460	1.724
P17535	259	S	Transcription factor jun-D	JUND	0.996376	4.16E-17	77.215	DEPQT(0.01)VPDVPS(0.083)FGES(0.908)PPLS(0.996)PIDMDT(0.002)QER	3	-1.4937	17	1.224	0.997	0.89	0.724	1.39	0.775	0.780	0.845	0.811	1.181	1.251	1.132	1.569	1.180	1.097	0.613	1.111	0.685	0.626	8.76E-02
P17535	255	S	Transcription factor jun-D	JUND	0.981479	3.65E-17	79.071	DEPQTVPDVPS(0.022)FGES(0.981)PPLS(0.995)PIDMDT(0.001)QER	3	-0.69903	16	0.768	0.576	0.505	1.641	0.846	1.664	0.780	0.845	0.811	1.181	1.251	1.132	0.985	0.682	0.623	1.390	0.676	1.470	1.545	2.07E-01
P17535	100	S	Transcription factor jun-D	JUND	1	6.63E-15	154.84	LAS(1)PELER	2	0.29346	19	0.477	0.507	0.472		1.862	1.681	0.780	0.845	0.811	1.181	1.251	1.132	0.612	0.600	0.582		1.488	1.485	2.487	4.37E-06
P17544	53	T	Cyclic AMP-dependent transcription factor ATF-7	ATF7	0.850372	5.10E-31	164.2	TDSVIIADQT(0.014)PT(0.85)PT(0.136)R	2	0.56355	5	0.729		0.941	1.196	1.433	0.701	1.081	0.853	0.949	1.059	1.058		0.674		0.992	1.129	1.354		1.491	1.70E-01
P17706	304	S	Tyrosine-protein phosphatase non-receptor type 2	PTPN2	1	2.32E-48	202.01	EDLSPAFDHS(1)PNK	3	-0.14111	17	1.177	0.975	1.057	0.946	1.054	0.791	0.878	0.996	0.896	1.195	1.050	0.985	1.341	0.979	1.180	0.792	1.004	0.803	0.743	7.46E-02
P17980	9	S	26S protease regulatory subunit 6A	PSMC3	0.995509	4.59E-10	111.78	MNLLPNIES(0.996)PVT(0.004)R	2	-0.20655	8	1.156	0.922	0.604	1.048	1.031	1.238	0.925	0.913	0.894	1.120	1.038	1.110	1.250	1.010	0.676	0.936	0.993	1.115	1.037	8.45E-01
P18031	118	S	Tyrosine-protein phosphatase non-receptor type 1	PTPN1	1	2.23E-02	68.355	VMEKGS(1)LK	2	-1.9097	2		1.275	1.232		1.003	0.49	1.016	1.053	1.056	0.953	0.984	0.938		1.211	1.167		1.019	0.522	0.648	2.36E-01
P18031	352	S	Tyrosine-protein phosphatase non-receptor type 1	PTPN1	0.999999	3.26E-17	116.38	GS(1)PLNAAPYGIESMSQDTEVR	2	-1.2384	16	1.017	0.922	0.799	0.924	1.379	0.958	1.016	1.053	1.056	0.953	0.984	0.938	1.001	0.876	0.757	0.970	1.401	1.021	1.288	1.74E-01
P18031	295	S	Tyrosine-protein phosphatase non-receptor type 1	PTPN1	1	9.10E-13	93.633	ELS(1)HEDLEPPPEHIPPPPRPPK	4	-0.21391	20	1.458	1.188	1.021	0.765	0.828	0.74	1.016	1.053	1.056	0.953	0.984	0.938	1.435	1.128	0.967	0.803	0.841	0.789	0.689	5.72E-02
P18031	378	S	Tyrosine-protein phosphatase non-receptor type 1	PTPN1	1	4.24E-03	115.49	VVGGS(1)LR	2	0.064901	3	0.853	0.84	0.766	0.999	1.097	1.445	1.016	1.053	1.056	0.953	0.984	0.938	0.840	0.798	0.725	1.048	1.115	1.541	1.568	4.72E-02
P18206	721	S	Vinculin	VCL	1	3.67E-06	101.43	S(1)LLDASEEAIK	2	-1.1411	5	1.362	0.929	1.144	0.953	0.576	1.037	0.998	1.015	1.020	0.974	0.998	0.996	1.365	0.915	1.122	0.978	0.577	1.041	0.763	2.41E-01
P18206	290	S	Vinculin	VCL	0.947982	5.57E-59	208.49	DPS(0.052)AS(0.948)PGDAGEQAIR	2	-0.13267	4	1.038	1.114	1.228	0.848	0.993	0.779	0.998	1.015	1.020	0.974	0.998	0.996	1.040	1.098	1.204	0.871	0.995	0.782	0.792	4.17E-02
P18433	189	S	Receptor-type tyrosine-protein phosphatase alpha	PTPRA	0.961797	9.72E-14	157.22	QAGS(0.014)HS(0.024)NS(0.962)FR	2	0.035134	9	0.883	0.788	0.783	0.559	1.987		1.274		0.726				0.693		1.079
P18583	152	S	Protein SON	SON	0.963648	1.11E-23	151.87	SHDDGNIDLES(0.964)DS(0.036)FLK	3	-0.067936	14	1.682	0.844	0.75	1.071	0.868	0.785	1.056	1.079	1.046	0.958	0.967	0.895	1.593	0.782	0.717	1.118	0.898	0.877	0.936	8.31E-01
P18583	1948	S	Protein SON	SON	1	7.68E-04	113.1	S(1)FS(1)IS(0.998)PS(0.002)R	2	-0.056206	65	1.101	1.077	1.012	0.872	0.982	0.957	1.056	1.079	1.046	0.958	0.967	0.895	1.043	0.998	0.967	0.910	1.016	1.069	0.996	9.36E-01
P18583	1769	S	Protein SON	SON	0.999977	9.23E-28	164.77	SAAS(1)PVVSSMPER	2	-0.21472	47	0.879	1.194	1.103	0.819	1.246	0.759	1.056	1.079	1.046	0.958	0.967	0.895	0.832	1.107	1.054	0.855	1.289	0.848	0.999	9.97E-01
P18583	142	S	Protein SON	SON	0.810906	2.72E-06	73.459	T(0.189)KS(0.811)HDDGNIDLESDSFLK	3	-0.18683	4	1.681	0.647	0.921	0.968	0.868	0.914	1.056	1.079	1.046	0.958	0.967	0.895	1.592	0.600	0.880	1.010	0.898	1.021	0.954	8.81E-01
P18583	1952	S	Protein SON	SON	0.999891	3.02E-07	162.36	SFSIS(1)PSR	1	-0.15272	76	1.102	1.012	1.014	0.901	0.998	0.974	1.056	1.079	1.046	0.958	0.967	0.895	1.044	0.938	0.969	0.941	1.032	1.088	1.037	5.29E-01
P18583	1950	S	Protein SON	SON	1	7.68E-04	101.53	S(1)FS(1)IS(0.997)PS(0.003)R	2	-0.45756	58	1.234	1.12	1.068	0.991	0.844	0.743	1.056	1.079	1.046	0.958	0.967	0.895	1.169	1.038	1.021	1.034	0.873	0.830	0.848	1.03E-01
P18583	2029	S	Protein SON	SON	1	9.04E-04	91.549	RFS(1)RS(1)PIR	2	0.064184	29	1.044	0.951	0.922	1.059	0.966	1.059	1.056	1.079	1.046	0.958	0.967	0.895	0.989	0.881	0.881	1.105	0.999	1.183	1.195	4.98E-02
P18583	1555	T	Protein SON	SON	0.795894	1.53E-23	129.77	EMEHNTVCAAGT(0.796)S(0.204)PVGEIGEEK	3	0.40842	21	0.953	0.012	1.239	1.253	1.149	1.395	1.056	1.079	1.046	0.958	0.967	0.895	0.902	0.011	1.185	1.308	1.188	1.559	1.933	1.53E-01
P18583	2129	S	Protein SON	SON	1	8.78E-26	108.39	EDDDVIVNKPHVS(1)DEEEEEPPFYHHPFK	4	-0.67302	23	1.176	1.154	1.153	0.881	0.833	0.803	1.056	1.079	1.046	0.958	0.967	0.895	1.114	1.070	1.102	0.920	0.861	0.897	0.815	7.10E-04
P18583	2013	S	Protein SON	SON	1	2.59E-07	152.97	S(1)FS(1)IS(1)PVR	2	0.44331	105	1.375	1.095	1.02	0.907	0.804	0.798	1.056	1.079	1.046	0.958	0.967	0.895	1.302	1.015	0.975	0.947	0.831	0.892	0.811	1.28E-01
P18583	1780	S	Protein SON	SON	0.823027	3.86E-06	79.69	AS(0.823)ES(0.417)S(0.38)S(0.38)EEKDDYEIFVK	2	-0.77861	10	1.313	0.963	0.896	1.16	0.763	0.905	1.056	1.079	1.046	0.958	0.967	0.895	1.243	0.892	0.857	1.211	0.789	1.011	1.006	9.73E-01
P18583	1556	S	Protein SON	SON	0.911925	3.78E-32	148.72	EMEHNTVCAAGT(0.088)S(0.912)PVGEIGEEK	2	-0.38318	40	0.832	0.767	1.083	1.095	1.004	1.219	1.056	1.079	1.046	0.958	0.967	0.895	0.788	0.711	1.035	1.143	1.038	1.362	1.398	6.96E-02
P18583	2011	S	Protein SON	SON	1	5.81E-06	115.06	S(1)FS(1)IS(1)PVR	2	0.44331	89	1.447	1.323	1.041	0.911	0.509	0.769	1.056	1.079	1.046	0.958	0.967	0.895	1.370	1.226	0.995	0.951	0.526	0.859	0.651	6.86E-02
P18583	2009	S	Protein SON	SON	1	4.51E-07	142.92	S(1)FS(1)IS(1)PVR	2	0.44331	88	1.418	1.087	1.02	0.892	0.812	0.771	1.056	1.079	1.046	0.958	0.967	0.895	1.343	1.007	0.975	0.931	0.840	0.861	0.792	1.28E-01
P18583	283	S	Protein SON	SON	0.966153	4.45E-10	131.35	SVEST(0.023)S(0.966)PEPS(0.011)K	2	-0.12607	3		1.116			0.966	0.919	1.056	1.079	1.046	0.958	0.967	0.895		1.034			0.999	1.027	0.979
P18583	1782	S	Protein SON	SON	0.918983	2.11E-07	91.589	AS(0.059)ES(0.919)S(0.919)S(0.103)EEKDDYEIFVK	3	0.041583	17	1.02	0.993	0.953	1.09	0.943		1.056	1.079	1.046	0.958	0.967	0.895	0.966	0.920	0.911	1.138	0.975		1.133	1.50E-01
P18583	94	S	Protein SON	SON	0.998529	1.11E-05	81.878	CVS(0.999)VQT(0.001)DPTDEIPTKK	3	-0.094876	4	0.949	0.731	0.653	1.331	0.898	1.437	1.056	1.079	1.046	0.958	0.967	0.895	0.899	0.677	0.624	1.389	0.929	1.606	1.783	5.69E-02
P18583	160	S	Protein SON	SON	0.99978	4.86E-05	81.51	FDS(1)EPSAVALELPTR	2	-0.75399	2	1.155	0.926	0.656		1.262		1.056	1.079	1.046	0.958	0.967	0.895	1.094	0.858	0.627		1.305		1.518
P18583	1954	S	Protein SON	SON	0.913546	1.98E-03	63.947	RRS(0.996)FS(0.991)IS(0.1)PS(0.914)R	2	-1.5166	3	1.765	0.807			0.428		1.056	1.079	1.046	0.958	0.967	0.895	1.671	0.748			0.443		0.366
P18583	2031	S	Protein SON	SON	1	9.04E-04	91.549	RFS(1)RS(1)PIR	2	0.064184	29	1.044	0.951	0.922	1.059	0.966	1.059	1.056	1.079	1.046	0.958	0.967	0.895	0.989	0.881	0.881	1.105	0.999	1.183	1.195	4.98E-02
P18583	1697	S	Protein SON	SON	0.999943	1.88E-22	153.18	ESDQTLAALLS(1)PK	3	0.13236	49	1.571	0.784	0.627	1.174	0.815	1.029	1.056	1.079	1.046	0.958	0.967	0.895	1.488	0.727	0.599	1.225	0.843	1.150	1.144	6.78E-01
P18583	1784	S	Protein SON	SON	0.941915	1.01E-06	85.737	AS(0.022)ES(0.207)S(0.829)S(0.942)EEKDDYEIFVK	3	-0.18833	9	1.21			0.79			1.056	1.079	1.046	0.958	0.967	0.895	1.146			0.825			0.720
P18583	1783	S	Protein SON	SON	0.918983	2.99E-09	102.39	AS(0.059)ES(0.919)S(0.919)S(0.103)EEKDDYEIFVK	3	0.041583	27	0.497	0.484	1.335	1.583	1.595	0.506	1.056	1.079	1.046	0.958	0.967	0.895	0.471	0.449	1.276	1.652	1.649	0.565	1.761	2.86E-01
P18615	181	S	Negative elongation factor E	NELFE	0.831576	3.57E-10	133.16	SGAHS(0.025)S(0.143)AS(0.832)PPR	2	-0.32656	6		0.745	1.128	1.127			0.756	1.112	1.022	1.043	1.087	0.979		0.670	1.104	1.081			1.218
P18669	118	S	Phosphoglycerate mutase 1	PGAM1	0.963041	9.17E-12	95.052	S(0.963)Y(0.037)DVPPPPMEPDHPFYSNISK	3	0.35427	19	1.049	0.886	1.078	1.062	0.914	1.011	1.058	1.002	1.014	0.983	1.041	0.901	0.991	0.884	1.063	1.080	0.878	1.122	1.048	6.33E-01
P18754	11	S	Regulator of chromosome condensation	RCC1	1	1.48E-09	130.65	S(1)PPADAIPK	1	-0.60963	94	0.803	1.498	1.229	0.968	0.7	0.801	1.089	1.085	1.039	0.909	0.904	0.973	0.737	1.381	1.183	1.065	0.774	0.823	0.807	3.69E-01
P18827	287	S	Syndecan-1	SDC1	0.957082	2.81E-36	157.74	KKDEGS(0.043)YS(0.957)LEEPK	3	-0.047943	13	0.931	1.116	0.721	1.232			0.819	0.942	0.937	1.238	1.141	0.923	1.137	1.185	0.769	0.995			0.966
P18827	285	S	Syndecan-1	SDC1	0.999754	2.81E-36	157.74	DEGS(1)YSLEEPK	2	-0.60475	18		1.063	0.686		1.251		0.819	0.942	0.937	1.238	1.141	0.923		1.128	0.732		1.096		1.179
P18858	66	S	DNA ligase 1	LIG1	1	6.85E-46	179.5	VLGS(1)EGEEEDEALS(1)PAK	2	-0.038735	19	1.048	0.853	0.865	1.118	0.99	1.126	0.857	0.857	0.894	1.219	1.102	1.071	1.223	0.995	0.968	0.917	0.898	1.051	0.900	3.22E-01
P18858	141	S	DNA ligase 1	LIG1	1	4.07E-42	178.51	TIQEVLEEQS(1)EDEDREAK	3	-0.43242	40	0.831	0.714	0.857	1.365	1.075	1.157	0.857	0.857	0.894	1.219	1.102	1.071	0.970	0.833	0.959	1.120	0.975	1.080	1.150	8.78E-02
P18858	76	S	DNA ligase 1	LIG1	1	5.65E-71	209.9	VLGS(1)EGEEEDEALS(1)PAK	2	-0.038735	25	1.076	0.903	1.317	0.988	0.895	0.821	0.857	0.857	0.894	1.219	1.102	1.071	1.256	1.054	1.473	0.811	0.812	0.767	0.632	1.90E-02
P18858	195	T	DNA ligase 1	LIG1	0.999939	3.58E-42	181.94	AET(1)PTESVSEPEVATK	2	0.33248	14	0.889	1.046	0.802	1.016	1.304	0.944	0.857	0.857	0.894	1.219	1.102	1.071	1.037	1.221	0.897	0.833	1.183	0.881	0.919	5.84E-01
P18887	447	S	DNA repair protein XRCC1	XRCC1	0.893129	9.36E-13	94.807	T(0.002)KPT(0.005)QAAGPS(0.1)S(0.893)PQKPPT(0.964)PEET(0.036)K	3	0.68578	16	0.975	1.275	1.259	0.426	1.047	1.018	0.998	0.999	0.982	1.037	1.003	0.982	0.977	1.276	1.282	0.411	1.044	1.037	0.705	2.09E-01
P18887	453	T	DNA repair protein XRCC1	XRCC1	0.990185	9.36E-13	94.807	TKPT(0.001)QAAGPS(0.169)S(0.83)PQKPPT(0.99)PEET(0.01)K	3	0.088359	16	0.785	1.234	0.847	0.88	1.407	0.847	0.998	0.999	0.982	1.037	1.003	0.982	0.787	1.235	0.863	0.849	1.403	0.863	1.080	7.55E-01
P18887	241	S	DNA repair protein XRCC1	XRCC1	1	8.93E-59	218.43	AIGSTSKPQES(1)PK	2	-0.14036	13	1.124	1.186	1.838	0.675	0.859	0.317	0.998	0.999	0.982	1.037	1.003	0.982	1.126	1.187	1.872	0.651	0.856	0.323	0.437	5.12E-02
P18887	266	S	DNA repair protein XRCC1	XRCC1	0.917545	7.83E-05	70.072	TPSKPPAQLS(0.918)PS(0.082)VPK	3	0.08552	7	0.879	0.336	0.768	1.681	1.336		0.998	0.999	0.982	1.037	1.003	0.982	0.881	0.336	0.782	1.621	1.332		2.216	4.39E-02
P19338	67	S	Nucleolin	NCL	0.994247	4.02E-14	181.46	VVVS(0.994)PT(0.006)K	2	-0.23244	53	1.014	0.859	1.214	0.791	1.282	0.84	0.974	1.035	0.980	0.994	0.999	1.019	1.041	0.830	1.239	0.796	1.283	0.824	0.934	7.45E-01
P19338	121	T	Nucleolin	NCL	1	5.48E-03	79.86	ALVAT(1)PGKK	2	-0.49664	4	0.756	1.076	0.854		1.056	1.259	0.974	1.035	0.980	0.994	0.999	1.019	0.776	1.040	0.871		1.057	1.236	1.280	1.27E-01
P19634	796	S	Sodium/hydrogen exchanger 1	SLC9A1	1	8.91E-05	51.001	CLS(1)DPGPHPEPGEGEPFFPK	3	-0.44725	2	0.664	0.624	0.625	1.349	1.274	1.465	0.815	0.607	0.707	1.114	1.595	1.162	0.815	1.028	0.884	1.211	0.799	1.261	1.199	3.19E-01
P19634	693	S	Sodium/hydrogen exchanger 1	SLC9A1	0.999988	8.69E-04	125.66	LDS(1)PTMSR	2	-0.030427	6	1.14	1.033	0.978	1.101	0.804	0.944	0.815	0.607	0.707	1.114	1.595	1.162	1.399	1.702	1.383	0.988	0.504	0.812	0.514	1.44E-02
P19634	785	S	Sodium/hydrogen exchanger 1	SLC9A1	0.919217	2.77E-20	110.89	ETSSPGTDDVFTPAPS(0.028)DS(0.919)PS(0.04)S(0.013)QR	3	-0.010842	29	1.065	1.083	1.001	0.954	0.953	0.944	0.815	0.607	0.707	1.114	1.595	1.162	1.307	1.784	1.416	0.856	0.597	0.812	0.503	1.06E-02
P19634	703	S	Sodium/hydrogen exchanger 1	SLC9A1	1	1.12E-08	121.42	IGS(1)DPLAYEPK	2	-0.13796	9	1.068	0.837	0.897	1.259	1.006	0.933	0.815	0.607	0.707	1.114	1.595	1.162	1.310	1.379	1.269	1.130	0.631	0.803	0.648	3.62E-02
P20020	1193	S	Plasma membrane calcium-transporting ATPase 1	ATP2B1	1	1.95E-36	144	IEDS(1)EPHIPLIDDTDAEDDAPTKR	3	-1.4951	47	1.374	1.008	1.101	0.892	0.696	0.929	1.071	1.024	1.058	0.985	0.935	0.927	1.283	0.984	1.041	0.906	0.744	1.002	0.802	1.39E-01
P20042	111	T	Eukaryotic translation initiation factor 2 subunit 2	EIF2S2	0.997874	3.20E-10	77.221	IES(0.002)DVQEPT(0.998)EPEDDLDIMLGNK	3	-0.11883	19	1.114	1.063	1.127	1.085	0.887	0.723	0.927	0.960	0.939	1.070	1.014	1.090	1.202	1.107	1.200	1.014	0.875	0.663	0.727	4.03E-02
P20042	2	S	Eukaryotic translation initiation factor 2 subunit 2	EIF2S2	1	8.38E-33	171.08	S(1)GDEMIFDPTMSK	2	-0.47256	50	0.912	0.845	0.834	1.187	1.142	1.08	0.927	0.960	0.939	1.070	1.014	1.090	0.984	0.880	0.888	1.109	1.126	0.991	1.172	4.31E-02
P20700	391	S	Lamin-B1	LMNB1	0.999998	6.93E-11	148.89	LKLS(1)PS(0.998)PS(0.001)S(0.001)R	2	0.49781	57	1.046	0.986	1.218	0.859	1.11	0.781	1.103	1.044	1.068	0.899	0.923	0.964	0.948	0.944	1.140	0.956	1.203	0.810	0.979	8.77E-01
P20700	393	S	Lamin-B1	LMNB1	0.998359	1.68E-07	117.33	LKLS(1)PS(0.998)PS(0.001)SR	3	0.01833	24	0.951	1.026	1.07	0.779	1.184	0.991	1.103	1.044	1.068	0.899	0.923	0.964	0.862	0.983	1.002	0.867	1.283	1.028	1.116	4.41E-01
P20700	23	S	Lamin-B1	LMNB1	0.884689	1.79E-07	107.97	AGGPT(0.001)T(0.011)PLS(0.885)PT(0.104)R	2	-0.39556	10	1.236	0.938	1.098	0.943	0.689	1.095	1.103	1.044	1.068	0.899	0.923	0.964	1.121	0.898	1.028	1.049	0.746	1.136	0.962	7.88E-01
P20749	374	S	B-cell lymphoma 3 protein	BCL3	0.999999	5.92E-15	131.56	PASTSQPDPS(1)PDR	2	0.26218	4	0.58	1.056		1.029	1.372	0.963
P20810	243	S	Calpastatin	CAST	0.791092	4.97E-48	120.42	KEGITGPPADSSKPIGPDDAIDALSSDFT(0.006)CGS(0.791)PT(0.202)AAGK	4	-0.22458	16	1.014	1.156	0.814	0.978	1.007	1.031	0.864	0.933	0.994	1.135	1.072	1.002	1.174	1.239	0.819	0.862	0.939	1.029	0.876	3.91E-01
P20810	366	S	Calpastatin	CAST	0.904309	6.71E-12	122.14	S(0.096)ES(0.904)ELIDELSEDFDR	2	-0.51603	5	1.558	0.769		1.139		0.534	0.864	0.933	0.994	1.135	1.072	1.002	1.803	0.824		1.004		0.533	0.585	4.21E-01
P20810	133	S	Calpastatin	CAST	0.759633	4.43E-06	69.272	S(0.76)LT(0.24)PAVPVESKPDKPSGK	3	0.053752	2		1.171	1.037		0.792		0.864	0.933	0.994	1.135	1.072	1.002		1.255	1.043		0.739		0.643
P21127	595	T	Cyclin-dependent kinase 11B	CDK11B	0.999821	2.45E-09	118.24	AYT(1)PVVVTLWYR	2	0.90567	3	1.139	0.949	0.603	1.103	1.185	1.02	0.925	0.850	0.930	1.095	1.122	1.078	1.231	1.116	0.648	1.007	1.056	0.946	1.004	9.81E-01
P21127	234	S	Cyclin-dependent kinase 11B	CDK11B	1	4.30E-03	109.48	S(1)PPRPPR	2	-0.14371	17	0.76	0.719	1.003	0.997	1.623	0.899	0.925	0.850	0.930	1.095	1.122	1.078	0.822	0.846	1.078	0.911	1.447	0.834	1.162	5.18E-01
P21127	283	S	Cyclin-dependent kinase 11B	CDK11B	0.983879	3.35E-59	214.82	DLLSDLQDIS(0.984)DS(0.016)ER	2	0.28568	27	0.859	1.062	0.939	1.069	1.067	1.003	0.925	0.850	0.930	1.095	1.122	1.078	0.929	1.249	1.010	0.976	0.951	0.930	0.896	3.21E-01
P21127	589	S	Cyclin-dependent kinase 11B	CDK11B	1	7.00E-03	110.79	EYGS(1)PLK	1	0.10905	20	0.925	0.634	0.788	1.299	1.09	1.265	0.925	0.850	0.930	1.095	1.122	1.078	1.000	0.746	0.847	1.186	0.971	1.173	1.285	7.24E-02
P21127	752	S	Cyclin-dependent kinase 11B	CDK11B	0.99967	4.94E-18	112.74	GT(1)S(1)PRPPEGGLGYSQLGDDDLK	3	-1.3677	14	1.227		1.106	1.315	0.145	1.207	0.925	0.850	0.930	1.095	1.122	1.078	1.326		1.189	1.201	0.129	1.120	0.649	3.97E-01
P21127	751	T	Cyclin-dependent kinase 11B	CDK11B	0.999684	4.94E-18	112.74	GT(1)S(1)PRPPEGGLGYSQLGDDDLK	3	-1.3677	17	1.059	0.735	0.954	1.134	1.076	1.042	0.925	0.850	0.930	1.095	1.122	1.078	1.145	0.865	1.026	1.036	0.959	0.967	0.976	7.85E-01
P21127	47	S	Cyclin-dependent kinase 11B	CDK11B	1	1.85E-13	162.16	RDS(1)LEEGELR	3	0.20934	6	1.164	0.972	1.025	0.692	1.147		0.925	0.850	0.930	1.095	1.122	1.078	1.258	1.144	1.102	0.632	1.022		0.708	1.19E-01
P21127	277	S	Cyclin-dependent kinase 11B	CDK11B	1	7.89E-16	137.73	DLLS(1)DLQDISDSER	2	0.75455	8	1.473	1.105	0.556	0.828	0.683	1.355	0.925	0.850	0.930	1.095	1.122	1.078	1.592	1.300	0.598	0.756	0.609	1.257	0.751	4.60E-01
P21127	72	S	Cyclin-dependent kinase 11B	CDK11B	1	1.63E-02	62.528	REDS(1)MEDR	2	-1.5696	3	0.784	0.858	0.744	1.387	1.227		0.925	0.850	0.930	1.095	1.122	1.078	0.848	1.009	0.800	1.267	1.094		1.332	6.64E-02
P21127	285	S	Cyclin-dependent kinase 11B	CDK11B	0.984625	7.48E-16	125.51	DLLSDLQDIS(0.015)DS(0.985)ERK	3	0.40049	15	0.831	1.124	0.539	1.147	1.467	0.892	0.925	0.850	0.930	1.095	1.122	1.078	0.898	1.322	0.580	1.047	1.307	0.827	1.136	6.45E-01
P21291	192	S	Cysteine and glycine-rich protein 1	CSRP1	1	8.17E-04	57.173	GFGFGQGAGALVHS(1)E	2	0.22765	2		0.91	0.973	1.127	1.157	0.833	1.031	1.001	1.120	0.909	0.815	1.124		0.909	0.869	1.240	1.420	0.741	1.275	4.20E-01
P21333	1084	S	Filamin-A	FLNA	0.997938	1.45E-16	136.48	AFGPGLQGGS(0.002)AGS(0.998)PAR	2	-1.0796	12	1.125	0.932	0.933	0.92	1.007	1.083	0.977	1.009	1.005	0.998	1.002	1.009	1.151	0.924	0.928	0.922	1.005	1.073	0.999	9.90E-01
P21333	2327	S	Filamin-A	FLNA	0.917008	4.52E-11	80.009	FNEEHIPDSPFVVPVAS(0.917)PS(0.083)GDAR	3	0.16416	13	1.159	0.919	0.95	0.966	1.102	0.905	0.977	1.009	1.005	0.998	1.002	1.009	1.186	0.911	0.945	0.968	1.100	0.897	0.974	8.17E-01
P21333	1459	S	Filamin-A	FLNA	0.999994	1.23E-16	141.82	CSGPGLS(1)PGMVR	2	-0.78141	15	1.008	0.865	0.969	1.185	0.963	1.011	0.977	1.009	1.005	0.998	1.002	1.009	1.032	0.857	0.964	1.187	0.961	1.002	1.104	3.14E-01
P21333	2152	S	Filamin-A	FLNA	1	1.97E-26	152.07	APS(1)VANVGSHCDLSLK	2	0.60861	119	1.233	1.238	1.093	0.888	0.902	0.646	0.977	1.009	1.005	0.998	1.002	1.009	1.262	1.227	1.088	0.890	0.900	0.640	0.679	1.89E-02
P21796	104	S	Voltage-dependent anion-selective channel protein 1	VDAC1	0.999951	9.29E-85	247.38	LTFDSSFS(1)PNTGK	2	1.2507	50	1.134	1.017	1.118	0.936	0.89	0.904	1.037	0.968	1.014	0.937	0.980	1.065	1.094	1.051	1.103	0.999	0.908	0.849	0.849	2.45E-02
P21860	982	S	Receptor tyrosine-protein kinase erbB-3	ERBB3	0.999772	4.45E-04	45.14	RES(1)GPGIAPGPEPHGLTNK	3	2.1837	1	1.392	1.103	1.367	0.527	0.61			1.000						1.103
P22059	240	S	Oxysterol-binding protein 1	OSBP	0.999917	8.21E-06	132.17	SLS(1)ELESLK	2	-1.0492	7	1.195	0.846	0.807	0.973	1.197	0.982	0.962	0.909	0.925	1.049	1.127	1.028	1.242	0.931	0.872	0.928	1.062	0.955	0.967	7.97E-01
P22059	190	S	Oxysterol-binding protein 1	OSBP	1	7.98E-30	127.16	MLAES(1)DES(1)GDEESVSQTDK	2	0.25897	22	0.799	0.94	0.575	1.22	1.312	1.155	0.962	0.909	0.925	1.049	1.127	1.028	0.831	1.034	0.622	1.163	1.164	1.124	1.388	5.51E-02
P22059	351	S	Oxysterol-binding protein 1	OSBP	1	1.47E-26	110.47	GDMS(1)DEDDENEFFDAPEIITMPENLGHK	3	0.11546	9	1.111	1.13	0.976	0.826	0.928	1.029	0.962	0.909	0.925	1.049	1.127	1.028	1.155	1.243	1.055	0.787	0.823	1.001	0.756	3.05E-02
P22059	193	S	Oxysterol-binding protein 1	OSBP	0.999989	7.98E-30	127.16	MLAES(1)DES(1)GDEESVSQTDK	2	0.078728	16		0.728		1.179	1.217	0.876	0.962	0.909	0.925	1.049	1.127	1.028		0.801		1.124	1.080	0.852	1.272
P22234	27	S	Multifunctional protein ADE2	PAICS	1	1.27E-19	180.3	TKEVYELLDS(1)PGK	2	1.1574	15	1.017	0.765	0.784	1.202	1.079	1.152	0.944	0.953	0.933	1.081	1.060	1.030	1.077	0.803	0.840	1.112	1.018	1.118	1.194	1.28E-01
P22234	107	S	Multifunctional protein ADE2	PAICS	0.998323	1.49E-03	82.831	IAT(0.002)GS(0.998)FLK	2	0.38487	1	1.347	0.923	0.947		1.114	0.668	0.944	0.953	0.933	1.081	1.060	1.030	1.427	0.969	1.015		1.051	0.649	0.747	3.18E-01
P22314	13	S	Ubiquitin-like modifier-activating enzyme 1	UBA1	1	1.79E-05	111.33	RVS(1)GPDPK	2	0.18951	7	0.926		1.408	1.184		0.482	0.927	0.991	0.923	1.011	1.097	1.051	0.999		1.525	1.171		0.459	0.646	4.19E-01
P22314	835	S	Ubiquitin-like modifier-activating enzyme 1	UBA1	0.999401	5.55E-04	64.52	AT(0.001)LPS(0.999)PDKLPGFK	3	0.27227	5			0.725	1.09		1.185	0.927	0.991	0.923	1.011	1.097	1.051			0.785	1.078		1.127	1.404
P22415	186	S	Upstream stimulatory factor 1	USF1	1	2.89E-03	102.55	THPYS(1)PK	2	-0.028432	8	0.735	0.753	1.384	0.797	1.421	0.91	0.924	0.953	0.667	1.481	1.158	0.818	0.795	0.790	2.075	0.538	1.227	1.112	0.786	6.14E-01
P22626	344	S	Heterogeneous nuclear ribonucleoproteins A2/B1	HNRNPA2B1	0.988396	8.63E-16	83.944	NMGGPYGGGNYGPGGS(0.011)GGS(0.988)GGYGGR	3	0.54308	7	0.724	1.086	0.914	1.276			1.084	1.100	1.080	0.898	0.917	0.921	0.668	0.987	0.846	1.421			1.704
P22626	259	S	Heterogeneous nuclear ribonucleoproteins A2/B1	HNRNPA2B1	0.999891	6.96E-13	71.623	GFGDGYNGYGGGPGGGNFGGS(1)PGYGGGR	3	-0.18669	12	1.22	1.158	0.753	0.91	1.257	0.701	1.084	1.100	1.080	0.898	0.917	0.921	1.125	1.053	0.697	1.013	1.371	0.761	1.094	7.05E-01
P22626	336	Y	Heterogeneous nuclear ribonucleoproteins A2/B1	HNRNPA2B1	0.753266	7.69E-12	78.976	NMGGPY(0.007)GGGNY(0.753)GPGGS(0.207)GGS(0.033)GGYGGR	3	-0.14117	4		1.065	0.972	0.962			1.084	1.100	1.080	0.898	0.917	0.921		0.968	0.900	1.071			1.147
P22670	159	S	MHC class II regulatory factor RFX1	RFX1	0.999991	7.54E-29	133.61	PGHVS(1)PLQLTNIQVPQQALPTQR	3	0.45617	8	0.839	0.822	0.781	1.237	1.457	0.864	0.966		0.900	1.002	1.006	1.126	0.869		0.868	1.235	1.448	0.767	1.325	3.57E-01
P22681	483	S	E3 ubiquitin-protein ligase CBL	CBL	0.956386	7.75E-10	69.248	VERPPS(0.956)PFS(0.044)MAPQASLPPVPPR	3	0.20341	15	1.099	0.827	0.735	0.839	1.5		1.052	0.968	1.009	0.887	1.132	0.952	1.045	0.854	0.728	0.946	1.325		1.296	2.54E-01
P22694	198	T	cAMP-dependent protein kinase catalytic subunit beta	PRKACB	0.976757	3.24E-20	138.66	T(0.022)WT(0.977)LCGT(0.001)PEYLAPEIILSK	3	-0.096374	28	0.87	1.025	0.701	1.288	1.122	0.994
P23193	100	S	Transcription elongation factor A protein 1	TCEA1	1	6.53E-72	239.51	KKEPAITSQNS(1)PEAR	3	-0.073807	61	0.955	0.817	1.075	1.145	1.319	0.69	1.077	1.050	1.023	0.982	0.994	0.874	0.887	0.778	1.051	1.166	1.327	0.789	1.209	3.48E-01
P23381	467	S	Tryptophan--tRNA ligase, cytoplasmic	WARS	1	1.06E-02	88.37	KLS(1)FDFQ	2	0.2304	6	1.33	1.104	0.813	0.886	0.945	0.922	0.907	0.984	0.859	1.094	1.127	1.028	1.466	1.122	0.946	0.810	0.839	0.897	0.720	1.00E-01
P23396	221	T	40S ribosomal protein S3	RPS3	0.995117	4.33E-14	130.27	DEILPT(0.004)T(0.995)PIS(0.001)EQK	2	-0.16137	26	1.159	0.747	0.842	1.092	1.085	1.074	0.865	0.868	0.917	1.104	1.081	1.165	1.340	0.861	0.918	0.989	1.004	0.922	0.935	6.80E-01
P23396	209	S	40S ribosomal protein S3	RPS3	1	6.38E-04	61.843	KPLPDHVS(1)IVEPK	3	-0.41742	9	1.138	0.598	0.872	1.223	1.148	1.021	0.865	0.868	0.917	1.104	1.081	1.165	1.316	0.689	0.951	1.108	1.062	0.876	1.031	8.84E-01
P23497	231	S	Nuclear autoantigen Sp-100	SP100	0.982039	5.86E-13	94.632	DTT(0.002)S(0.001)DKDDS(0.006)LGS(0.982)QQT(0.009)NEQCAQK	3	0.10463	6	1.023	0.751	1.252	0.357	1.418	1.199	0.960	0.937	1.056	0.956	0.947	1.143	1.066	0.801	1.186	0.373	1.497	1.049	0.956	9.04E-01
P23497	362	S	Nuclear autoantigen Sp-100	SP100	1	1.56E-18	128.05	SEPVINNDNPLES(1)NDEK	2	0.21427	22	0.997	1.168	0.731	0.855	1.307	0.942	0.960	0.937	1.056	0.956	0.947	1.143	1.039	1.247	0.692	0.894	1.380	0.824	1.041	8.73E-01
P23497	18	S	Nuclear autoantigen Sp-100	SP100	1	1.55E-46	162.81	LNECIS(1)PVANEMNHLPAHSHDLQR	4	-1.241	45	0.803	0.775	1.344	0.998	0.917	1.164	0.960	0.937	1.056	0.956	0.947	1.143	0.836	0.827	1.273	1.044	0.968	1.018	1.032	8.43E-01
P23497	409	S	Nuclear autoantigen Sp-100	SP100	0.999941	3.75E-44	148.12	VIGQDHDFS(1)ES(1)S(1)EEEAPAEASSGALR	2	0.21695	45	0.423	0.416	0.329	0.384	2.246	2.203	0.960	0.937	1.056	0.956	0.947	1.143	0.441	0.444	0.312	0.402	2.372	1.927	3.930	1.23E-01
P23497	157	S	Nuclear autoantigen Sp-100	SP100	1	3.53E-59	218.63	LPLQES(1)EEEEREER	2	-0.58262	21	0.936	0.911	1.167	0.947	1.104	0.935	0.960	0.937	1.056	0.956	0.947	1.143	0.975	0.972	1.105	0.991	1.166	0.818	0.974	8.24E-01
P23497	410	S	Nuclear autoantigen Sp-100	SP100	0.999941	3.75E-44	148.12	VIGQDHDFS(1)ES(1)S(1)EEEAPAEASSGALR	2	0.21695	44	2.349	0.408	2.107	0.377	0.425	0.334	0.960	0.937	1.056	0.956	0.947	1.143	2.447	0.435	1.995	0.394	0.449	0.292	0.233	1.11E-01
P23508	294	S	Colorectal mutant cancer protein	MCC	0.812326	5.78E-22	145.48	LQSVQATGPS(0.188)S(0.812)PGR	2	0.40452	4			1.108	0.835	1.084	0.972				1.000						0.835
P23528	3	S	Cofilin-1	CFL1	1	2.31E-07	103.88	AS(1)GVAVSDGVIK	2	0.58516	11	1.071	0.916	1.056	0.824	1.149	0.984	0.944	0.938	0.913	1.095	0.999	1.112	1.135	0.977	1.157	0.753	1.150	0.885	0.853	2.85E-01
P23588	445	S	Eukaryotic translation initiation factor 4B	EIF4B	0.998382	2.55E-04	77.658	ES(0.001)EKS(0.998)LENETLNK	2	1.5284	1	1.181	0.704	0.843			1.272	0.863	0.953	0.916	1.093	1.093	1.081	1.368	0.739	0.920			1.177	1.166
P23588	309	S	Eukaryotic translation initiation factor 4B	EIF4B	0.988823	1.73E-03	70.563	RDDRS(0.989)WS(0.006)S(0.006)R	3	-0.149	3		0.443	0.579	1.443	1.281	1.255	0.863	0.953	0.916	1.093	1.093	1.081		0.465	0.632	1.320	1.172	1.161	2.220	5.19E-03
P23588	459	S	Eukaryotic translation initiation factor 4B	EIF4B	0.997085	5.89E-10	97.733	EEDCHS(0.997)PT(0.002)S(0.001)KPPKPDQPLK	4	0.022578	25	1.234	0.937	0.819	1.127	0.946	0.937	0.863	0.953	0.916	1.093	1.093	1.081	1.430	0.983	0.894	1.031	0.866	0.867	0.836	3.58E-01
P23588	406	S	Eukaryotic translation initiation factor 4B	EIF4B	1	5.72E-04	148.94	ERHPS(1)WR	2	-0.020608	9	1.256	0.611	0.53	1.541	1.075	0.987	0.863	0.953	0.916	1.093	1.093	1.081	1.455	0.641	0.579	1.410	0.984	0.913	1.236	5.49E-01
P23588	504	S	Eukaryotic translation initiation factor 4B	EIF4B	0.979704	7.36E-26	149.44	SQSSDTEQQS(0.98)PT(0.018)S(0.003)GGGK	2	-0.48365	4		0.722	0.779		2.028	0.471	0.863	0.953	0.916	1.093	1.093	1.081		0.758	0.850		1.855	0.436	1.425	6.79E-01
P23743	24	T	Diacylglycerol kinase alpha	DGKA	0.981603	8.06E-02	53.554	YMEYS(0.018)T(0.982)K	1	1.2621	1	1.147	1.018	1.137	0.792	0.984	0.921	0.874	0.983	0.908	1.180	1.074	0.981	1.312	1.036	1.252	0.671	0.916	0.939	0.702	4.06E-02
P24723	675	S	Protein kinase C eta type	PRKCH	0.998711	8.53E-05	82.515	NFS(0.999)YVS(0.001)PELQP	2	0.67881	2	1.12	0.887	0.987			1.006
P24928	1864	S	DNA-directed RNA polymerase II subunit RPB1	POLR2A	0.933039	2.21E-03	76.282	YSPT(0.067)S(0.933)PK	2	0.078952	7	0.955	1.012	1.105	0.922	1.13	0.875	0.961	1.017	0.966	0.969	1.031	1.056	0.994	0.995	1.144	0.951	1.096	0.829	0.918	4.05E-01
P24928	1919	T	DNA-directed RNA polymerase II subunit RPB1	POLR2A	0.759746	3.78E-27	162.26	YSPTSPT(0.019)YS(0.142)PT(0.76)S(0.079)PK	2	-1.0545	8	1.359		1.011			0.63	0.961	1.017	0.966	0.969	1.031	1.056	1.414		1.047			0.597	0.485
P24928	1913	S	DNA-directed RNA polymerase II subunit RPB1	POLR2A	0.950511	4.62E-11	124.2	YSPT(0.049)S(0.951)PTYSPTSPK	2	-0.2398	9	1.657		0.821	0.75		0.772	0.961	1.017	0.966	0.969	1.031	1.056	1.724		0.850	0.774		0.731	0.585	3.46E-01
P24928	1861	S	DNA-directed RNA polymerase II subunit RPB1	POLR2A	0.995621	6.79E-03	74.941	YS(0.996)PT(0.004)S(0.001)PK	2	0.30346	2		0.915	1.193		0.85	1.042	0.961	1.017	0.966	0.969	1.031	1.056		0.900	1.235		0.824	0.987	0.848	4.77E-01
P24928	1917	S	DNA-directed RNA polymerase II subunit RPB1	POLR2A	0.909821	3.75E-08	110.37	YS(0.971)PT(0.029)SPTYS(0.91)PT(0.072)S(0.018)PK	2	-0.0087012	7	0.967	0.948	1.155	1.033	0.963	0.934	0.961	1.017	0.966	0.969	1.031	1.056	1.006	0.932	1.196	1.066	0.934	0.884	0.920	4.32E-01
P24928	1906	S	DNA-directed RNA polymerase II subunit RPB1	POLR2A	0.755708	4.15E-09	76.909	YSPTSPTYSPT(0.001)S(0.001)PVY(0.003)T(0.017)PT(0.222)S(0.756)PK	2	-0.77503	4	0.84	1.456	0.996		0.707		0.961	1.017	0.966	0.969	1.031	1.056	0.874	1.432	1.031		0.686		0.617
P24928	1910	S	DNA-directed RNA polymerase II subunit RPB1	POLR2A	0.973647	3.75E-08	110.37	YS(0.974)PT(0.026)SPT(0.024)YS(0.904)PT(0.06)S(0.013)PK	2	1.1048	9	0.967	0.948	1.155	1.033	0.963	0.934	0.961	1.017	0.966	0.969	1.031	1.056	1.006	0.932	1.196	1.066	0.934	0.884	0.920	4.32E-01
P25054	1774	S	Adenomatous polyposis coli protein	APC	0.877261	3.13E-16	130.36	KPT(0.123)S(0.877)PVKPIPQNTEYR	3	-0.098364	2	0.96	1.229	0.86		0.952		0.928	1.187		0.732	1.009	1.144	1.034	1.035			0.944		0.912
P25054	2093	S	Adenomatous polyposis coli protein	APC	0.996859	2.44E-11	93.166	DIQRPDS(0.003)EHGLS(0.997)PDSENFDWK	3	-0.56095	12	0.631	0.766	1.001	1.078	0.914	1.61	0.928	1.187		0.732	1.009	1.144	0.680	0.645		1.473	0.906	1.407	1.904	8.12E-02
P25054	1438	T	Adenomatous polyposis coli protein	APC	0.987085	5.73E-21	142.94	S(0.013)KT(0.987)PPPPPQTAQTK	2	-0.19485	11	0.7	1.292	0.957	0.503	1.701	0.846	0.928	1.187		0.732	1.009	1.144	0.754	1.088		0.687	1.686	0.740	1.126	8.08E-01
P25054	1371	S	Adenomatous polyposis coli protein	APC	0.997102	1.45E-03	47.499	S(0.997)PPEHY(0.003)VQETPLMFSR	3	-0.17375	3	1.585		0.791	0.624			0.928	1.187		0.732	1.009	1.144	1.708			0.852			0.499
P25054	1436	S	Adenomatous polyposis coli protein	APC	0.835096	2.76E-05	85.562	S(0.835)KT(0.165)PPPPPQTAQTK	3	-0.044456	6	0.756	1.039	1.284	0.713	1.199	1.009	0.928	1.187		0.732	1.009	1.144	0.815	0.875		0.974	1.188	0.882	1.201	2.50E-01
P25054	2449	S	Adenomatous polyposis coli protein	APC	0.999289	1.14E-03	90.37	EAPS(0.999)PT(0.001)LR	2	-0.18353	10	0.915	0.786	1.077	1.026	1.097	1.099	0.928	1.187		0.732	1.009	1.144	0.986	0.662		1.402	1.087	0.961	1.395	2.15E-01
P25054	2088	S	Adenomatous polyposis coli protein	APC	0.97151	2.49E-04	45.791	DIQRPDS(0.972)EHGLS(0.796)PDS(0.233)ENFDWK	3	-0.50917	1			0.76			1.24	0.928	1.187		0.732	1.009	1.144						1.084
P25054	744	S	Adenomatous polyposis coli protein	APC	0.998083	3.01E-07	88.176	DANIMS(0.998)PGS(0.001)SLPSLHVR	3	-0.22502	4	1.143	0.836	0.633	1.389			0.928	1.187		0.732	1.009	1.144	1.232	0.704		1.898			1.960
P25205	674	T	DNA replication licensing factor MCM3	MCM3	0.99999	4.13E-52	170.18	SEDES(1)ET(1)EDEEEK	2	0.45581	11		1.276			0.7	1.024	1.039	1.060	1.065	0.972	0.908	0.956		1.204			0.771	1.071	0.765
P25205	668	S	DNA replication licensing factor MCM3	MCM3	1	8.29E-42	170.63	KRS(1)EDESETEDEEEK	3	-0.48283	4	1.373	0.532	1.081	1.405	0.746	0.863	1.039	1.060	1.065	0.972	0.908	0.956	1.321	0.502	1.015	1.445	0.822	0.903	1.117	7.39E-01
P25440	301	S	Bromodomain-containing protein 2	BRD2	0.801516	7.84E-13	67.814	KADTTTPTPTAILAPGS(0.115)PAS(0.802)PPGS(0.084)LEPK	3	0.076229	3		0.823	1.254		1.339	0.585	0.786	0.860	0.811	1.244	0.979	1.319		0.957	1.546		1.368	0.444	0.724	5.92E-01
P25705	76	S	ATP synthase subunit alpha, mitochondrial	ATP5A1	1	1.36E-04	90.434	VLS(1)IGDGIAR	2	-2.8234	2	1.215	0.805	1.019	0.979	0.893	1.09	1.008	0.987	1.068	0.958	1.019	0.960	1.205	0.816	0.954	1.022	0.876	1.135	1.020	8.93E-01
P26045	359	S	Tyrosine-protein phosphatase non-receptor type 3	PTPN3	0.999976	1.52E-09	134.56	S(1)LS(1)VEHLETK	2	-0.90292	6	1.452	0.482	0.738	0.88	1.237	1.211	1.133	1.160	0.964	0.724	1.145	0.874	1.282	0.416	0.766	1.215	1.080	1.386	1.495	2.02E-01
P26045	357	S	Tyrosine-protein phosphatase non-receptor type 3	PTPN3	0.999985	4.33E-03	53.038	S(1)LS(1)VEHLETK	2	-0.90292	2			0.35		1.44	1.21	1.133	1.160	0.964	0.724	1.145	0.874			0.363		1.258	1.384	3.639
P26045	425	S	Tyrosine-protein phosphatase non-receptor type 3	PTPN3	0.998192	3.59E-16	131.25	GSLAPQDS(0.998)DS(0.002)EVSQNR	2	-1.5596	5	0.905	0.751	1.234	1.259	0.968	0.882	1.133	1.160	0.964	0.724	1.145	0.874	0.799	0.647	1.280	1.739	0.845	1.009	1.318	4.36E-01
P26358	312	S	DNA (cytosine-5)-methyltransferase 1	DNMT1	1	6.89E-07	82.189	VNPQIS(1)DEKDEDEKEEK	3	1.478	3	0.973	0.91	0.835	1.364	0.919		0.994	1.004	0.937	1.026	0.977	1.061	0.979	0.906	0.891	1.329	0.941		1.226	2.54E-01
P26358	714	S	DNA (cytosine-5)-methyltransferase 1	DNMT1	1	4.82E-20	138.49	EADDDEEVDDNIPEMPS(1)PK	3	-0.44437	48	0.865	1.29	1.05	1.096	1.044	0.655	0.994	1.004	0.937	1.026	0.977	1.061	0.870	1.285	1.121	1.068	1.069	0.617	0.841	4.18E-01
P26358	143	S	DNA (cytosine-5)-methyltransferase 1	DNMT1	0.997322	1.55E-16	135.23	S(0.003)KS(0.997)DGEAKPEPSPSPR	3	0.3697	4	0.793	0.881	1.098	1.084	1.286	0.858	0.994	1.004	0.937	1.026	0.977	1.061	0.798	0.877	1.172	1.057	1.316	0.809	1.117	5.80E-01
P26368	2	S	Splicing factor U2AF 65 kDa subunit	U2AF2	1	5.04E-04	105.98	S(1)DFDEFER	2	0.21331	11	1.27	0.731	1.115	1.065	0.911	0.908	0.941	0.890	0.913	0.995	1.146	1.115	1.350	0.821	1.221	1.070	0.795	0.814	0.790	2.62E-01
P26368	79	S	Splicing factor U2AF 65 kDa subunit	U2AF2	1	1.84E-33	205.04	GAKEEHGGLIRS(1)PR	4	-0.21941	41	1.114	1.28	1.283	0.721	0.974	0.627	0.941	0.890	0.913	0.995	1.146	1.115	1.184	1.438	1.405	0.725	0.850	0.562	0.531	5.46E-03
P27361	204	Y	Mitogen-activated protein kinase 3	MAPK3	0.919784	1.33E-03	46.558	IADPEHDHT(0.005)GFLT(0.986)EY(0.92)VAT(0.089)R	3	-2.7261	1			1.226	1.085		0.689	0.881	0.747	0.906	1.136	1.113	1.218			1.353	0.955		0.566	0.562
P27361	202	T	Mitogen-activated protein kinase 3	MAPK3	0.985544	1.33E-03	46.558	IADPEHDHT(0.005)GFLT(0.986)EY(0.92)VAT(0.089)R	3	-2.7261	1			1.226	1.085		0.689	0.881	0.747	0.906	1.136	1.113	1.218			1.353	0.955		0.566	0.562
P27694	384	S	Replication protein A 70 kDa DNA-binding subunit	RPA1	1	4.74E-03	79.454	VS(1)DFGGR	2	-0.22447	5	0.674	0.998	0.959	1.017	1.137	1.215	1.060	1.118	1.089	0.886	0.900	0.946	0.636	0.893	0.881	1.148	1.263	1.284	1.534	1.03E-02
P27708	1859	S	CAD protein	CAD	1	6.24E-07	100.41	IHRAS(1)DPGLPAEEPK	3	0.036467	25	0.883	0.865	1.016	1.111	1.058	1.067	0.943	0.993	0.984	1.052	1.053	0.976	0.936	0.871	1.033	1.056	1.005	1.093	1.111	1.22E-01
P27816	787	S	Microtubule-associated protein 4	MAP4	0.99995	2.73E-48	202.65	RAS(1)PSKPASAPASR	2	-0.01719	19	1.579	0.612	0.712	1.029	0.878	1.189	0.899	0.977	0.932	1.121	0.998	1.073	1.756	0.626	0.764	0.918	0.880	1.108	0.923	8.36E-01
P27816	384	S	Microtubule-associated protein 4	MAP4	0.994904	4.78E-08	124.62	KET(0.005)ERAS(0.995)PIK	2	0.076301	3		0.479	1.088	0.908	0.863	1.662	0.899	0.977	0.932	1.121	0.998	1.073		0.490	1.167	0.810	0.865	1.549	1.296	5.80E-01
P27816	11	T	Microtubule-associated protein 4	MAP4	0.788213	2.64E-09	76.176	ADLS(0.007)LADALT(0.788)EPS(0.204)PDIEGEIK	3	-0.35314	2		0.504	0.67	1.826			0.899	0.977	0.932	1.121	0.998	1.073		0.516	0.719	1.629			2.638
P27816	636	S	Microtubule-associated protein 4	MAP4	1	5.92E-10	120.4	KCS(1)LPAEEDSVLEK	3	0.17121	17	1.164	0.67	0.634	1.527	0.886	1.119	0.899	0.977	0.932	1.121	0.998	1.073	1.295	0.686	0.680	1.362	0.888	1.043	1.238	4.42E-01
P27816	280	S	Microtubule-associated protein 4	MAP4	0.998584	2.97E-59	219.95	DMES(0.999)PT(0.001)KLDVTLAK	2	0.6426	46	1.128	1.022	0.794	1.011	1.36	0.686	0.899	0.977	0.932	1.121	0.998	1.073	1.255	1.046	0.852	0.902	1.363	0.639	0.921	7.48E-01
P27816	358	S	Microtubule-associated protein 4	MAP4	0.999995	1.50E-05	127.85	ETERAS(1)PIK	2	0.98513	6	1.134	0.832	0.956	1.046	1.033		0.899	0.977	0.932	1.121	0.998	1.073	1.261	0.852	1.026	0.933	1.035		0.941	7.20E-01
P27816	14	S	Microtubule-associated protein 4	MAP4	0.894884	3.56E-07	66.017	ADLSLADALT(0.105)EPS(0.895)PDIEGEIK	3	0.56937	5	0.689				0.937	1.374	0.899	0.977	0.932	1.121	0.998	1.073	0.766				0.939	1.281	1.448
P27816	521	T	Microtubule-associated protein 4	MAP4	1	3.31E-22	147.7	DVT(1)PPPETEVVLIK	3	0.01532	51	1.083	0.963	0.803	1.087	1.025	1.04	0.899	0.977	0.932	1.121	0.998	1.073	1.205	0.986	0.862	0.970	1.027	0.969	0.972	7.93E-01
P27816	510	S	Microtubule-associated protein 4	MAP4	0.95325	2.90E-04	67.928	DMS(1)PLS(0.953)ET(0.047)EMALGK	2	-0.13159	2	0.608		0.599	1.051	1.6	1.142	0.899	0.977	0.932	1.121	0.998	1.073	0.676		0.643	0.938	1.603	1.064	1.822	1.32E-01
P27816	696	S	Microtubule-associated protein 4	MAP4	1	2.26E-04	103.21	ELPPS(1)PEKK	2	-0.67264	32	0.775	1.046	1.07	0.857	1.376	0.876	0.899	0.977	0.932	1.121	0.998	1.073	0.862	1.071	1.148	0.764	1.379	0.816	0.961	8.60E-01
P27816	507	S	Microtubule-associated protein 4	MAP4	0.999993	1.05E-06	97.904	DMS(1)PLSETEMALGK	2	-0.16508	10	1.136	0.333	0.259	1.425	1.628	1.218	0.899	0.977	0.932	1.121	0.998	1.073	1.264	0.341	0.278	1.271	1.631	1.135	2.145	1.10E-01
P27816	624	S	Microtubule-associated protein 4	MAP4	0.844493	1.75E-17	69.154	GISEDSHLESLQDVGQS(0.025)AAPT(0.033)FMIS(0.844)PET(0.077)VT(0.013)GT(0.007)GK	3	0.52216	3	0.684		0.648		1.668		0.899	0.977	0.932	1.121	0.998	1.073	0.761		0.695		1.671		2.296
P27816	1073	S	Microtubule-associated protein 4	MAP4	1	1.23E-12	111.68	VGS(1)LDNVGHLPAGGAVK	2	0.57611	12	0.908	1.059	0.871	0.766	1.508	0.888	0.899	0.977	0.932	1.121	0.998	1.073	1.010	1.084	0.935	0.683	1.511	0.828	0.998	9.94E-01
P27824	564	S	Calnexin	CANX	0.999905	2.00E-107	233.65	SDAEEDGGTVS(1)QEEEDR	2	-0.13769	138	0.949	0.013	1.209	1.047	1.738	1.043	1.053	1.087	1.038	0.905	0.982	0.934	0.901	0.012	1.165	1.157	1.770	1.117	1.946	1.83E-01
P27824	554	S	Calnexin	CANX	1	4.60E-224	340.18	S(1)DAEEDGGT(0.006)VS(0.994)QEEEDR	2	-0.15718	122	1.39	0.728	1.036	1.037	0.649	1.16	1.053	1.087	1.038	0.905	0.982	0.934	1.320	0.670	0.998	1.146	0.661	1.242	1.020	9.42E-01
P27824	583	S	Calnexin	CANX	1	2.96E-50	221.59	AEEDEILNRS(1)PR	2	0.56122	133	1.221	1.003	0.818	0.996	0.851	1.111	1.053	1.087	1.038	0.905	0.982	0.934	1.160	0.923	0.788	1.101	0.867	1.190	1.100	5.47E-01
P28066	56	S	Proteasome subunit alpha type-5	PSMA5	0.957888	1.14E-06	100.43	IT(0.042)S(0.958)PLMEPSSIEK	2	0.29046	8	0.912	0.496	0.512	1.697	1.383		0.973	0.962	0.984	0.970	1.006	1.105	0.937	0.516	0.520	1.749	1.375		2.375	2.87E-02
P28290	92	S	Sperm-specific antigen 2	SSFA2	0.999992	5.64E-16	126.26	TPLGAS(1)LDEQSSSTLK	2	-0.83994	4	1.114	0.942	0.588	1.183	1.169	1.003	1.090	0.987	1.047	0.992	0.899	0.985	1.022	0.954	0.562	1.193	1.300	1.018	1.383	1.21E-01
P28290	737	S	Sperm-specific antigen 2	SSFA2	0.999142	1.24E-06	97.235	S(0.999)QS(0.999)LPT(0.001)T(0.001)LLSPVR	2	-1.5964	6	1.386	1.126	1.463	1.018	0.503	0.503	1.090	0.987	1.047	0.992	0.899	0.985	1.272	1.141	1.397	1.026	0.560	0.511	0.550	3.39E-02
P28290	746	S	Sperm-specific antigen 2	SSFA2	0.999181	3.87E-10	97.256	S(0.064)QS(0.936)LPTT(0.001)LLS(0.999)PVR	2	0.80109	5	1.521	0.79	1.054	1.27	0.623	0.743	1.090	0.987	1.047	0.992	0.899	0.985	1.395	0.800	1.007	1.280	0.693	0.754	0.852	5.69E-01
P28290	739	S	Sperm-specific antigen 2	SSFA2	0.999037	6.10E-11	124.5	S(0.999)QS(0.999)LPT(0.001)T(0.001)LLSPVR	2	-1.5964	12	1.166	1.279	1.112	1.268	0.72	0.455	1.090	0.987	1.047	0.992	0.899	0.985	1.070	1.296	1.062	1.278	0.801	0.462	0.741	3.01E-01
P28290	803	S	Sperm-specific antigen 2	SSFA2	0.950208	1.39E-03	66.059	STIFIS(0.95)PS(0.034)S(0.015)VK	2	-0.96978	3	1.28	1.076	0.95	0.867		0.827	1.090	0.987	1.047	0.992	0.899	0.985	1.174	1.090	0.907	0.874		0.840	0.810	1.46E-01
P28290	668	S	Sperm-specific antigen 2	SSFA2	0.998205	8.79E-04	97.813	S(0.002)LAS(0.998)IEAK	2	0.57605	2	1.533	1.093	0.765	0.825	0.724	1.061	1.090	0.987	1.047	0.992	0.899	0.985	1.406	1.107	0.731	0.832	0.805	1.077	0.837	4.55E-01
P28370	118	T	Probable global transcription activator SNF2L1	SMARCA1	0.976631	2.04E-03	91.215	S(0.001)PT(0.977)S(0.022)PLNMK	2	-0.58962	2	1.26	0.916	1.179	1.07	0.791	0.783	0.961	1.072	0.974	0.977	0.976	1.040	1.311	0.854	1.210	1.095	0.810	0.753	0.787	2.42E-01
P28482	185	T	Mitogen-activated protein kinase 1	MAPK1	0.998426	8.88E-09	95.209	VADPDHDHT(0.001)GFLT(0.998)EY(0.991)VAT(0.01)R	3	-0.24769	5	1.369	1.145	1.17	0.685	0.631		0.954	0.943	0.939	1.105	1.029	1.030	1.435	1.214	1.246	0.620	0.613		0.475	4.62E-03
P28482	187	Y	Mitogen-activated protein kinase 1	MAPK1	0.991111	8.88E-09	95.209	VADPDHDHT(0.001)GFLT(0.998)EY(0.991)VAT(0.01)R	3	-0.24769	5	1.369	1.145	1.17	0.685	0.631		0.954	0.943	0.939	1.105	1.029	1.030	1.435	1.214	1.246	0.620	0.613		0.475	4.62E-03
P28715	384	S	DNA repair protein complementing XP-G cells	ERCC5	0.998629	2.38E-59	218.36	NAPAAVDEGS(0.001)IS(0.999)PR	2	1.4016	5	0.692	0.912	0.764	1.153	1.386	1.093				1.000						1.153
P28715	562	S	DNA repair protein complementing XP-G cells	ERCC5	0.998546	1.18E-10	102.08	FDSSLLS(0.999)S(0.994)DDET(0.007)K	2	0.67521	3	0.934	0.564	0.826	1.507	1.157	1.012				1.000						1.507
P28715	563	S	DNA repair protein complementing XP-G cells	ERCC5	0.994997	1.18E-10	102.08	FDSS(0.001)LLS(0.998)S(0.995)DDET(0.006)K	2	-0.25477	3	0.934	0.564	0.826	1.507	1.157	1.012				1.000						1.507
P28715	526	S	DNA repair protein complementing XP-G cells	ERCC5	0.999206	8.02E-12	124.99	ELTPAS(0.999)PT(0.001)CTNSVSK	2	3.3515	5	1.113	0.698		1.052	1.019	1.119				1.000						1.052
P28715	341	S	DNA repair protein complementing XP-G cells	ERCC5	0.971641	1.35E-03	69.314	EPDAT(0.028)PPS(0.972)PR	2	-0.33873	8	0.817	0.575	0.685	1.19	1.002	1.73				1.000						1.190
P29317	897	S	Ephrin type-A receptor 2	EPHA2	0.998913	1.01E-32	146.27	LPS(0.999)T(0.163)S(0.53)GS(0.308)EGVPFR	2	-0.35867	19	0.731	0.706	0.613	2.719	0.712	0.518	1.070	1.107	1.135	0.841	0.901	0.946	0.683	0.638	0.540	3.233	0.790	0.548	2.456	3.52E-01
P29317	899	S	Ephrin type-A receptor 2	EPHA2	0.976434	1.29E-21	145.46	LPS(0.996)T(0.02)S(0.976)GS(0.008)EGVPFR	2	-0.35945	19	2.508	0.415	0.361		1.412	0.304	1.070	1.107	1.135	0.841	0.901	0.946	2.344	0.375	0.318		1.567	0.321	0.933	9.49E-01
P29317	901	S	Ephrin type-A receptor 2	EPHA2	0.880632	1.39E-21	144.73	LPS(0.985)T(0.019)S(0.115)GS(0.881)EGVPFR	2	-0.074372	8	0.124	3.43	0.099	0.539	0.807		1.070	1.107	1.135	0.841	0.901	0.946	0.116	3.098	0.087	0.641	0.896		0.698	8.14E-01
P29375	1111	S	Lysine-specific demethylase 5A	KDM5A	1	9.27E-19	133.98	DLDLEPLS(1)DLEEGLEETR	2	0.67288	17	1.529	1.105	0.885	0.891	0.739	0.852			1.000						0.885
P29375	204	S	Lysine-specific demethylase 5A	KDM5A	0.909729	1.43E-30	141.19	EKVEPEVLSTDT(0.004)QT(0.085)S(0.91)PEPGT(0.001)R	3	-2.2354	5	1.101	1.07	1.122	0.921		0.785			1.000						1.122
P29375	1423	S	Lysine-specific demethylase 5A	KDM5A	1	4.46E-02	64.927	KS(1)PLVPR	2	0.68609	1	1.414			0.645	0.941				1.000
P29401	287	T	Transketolase	TKT	0.999995	5.55E-07	74.561	ILAT(1)PPQEDAPSVDIANIR	3	-0.50162	4	1.012	0.66	0.631	1.268	1.348	1.081	0.920	1.002	0.981	1.018	0.985	1.093	1.100	0.659	0.643	1.246	1.369	0.989	1.500	9.88E-02
P29401	295	S	Transketolase	TKT	0.998103	6.04E-04	42.813	ILAT(0.002)PPQEDAPS(0.998)VDIANIR	3	-0.05716	1	0.818		0.811	1.293	1.082	0.995	0.920	1.002	0.981	1.018	0.985	1.093	0.889		0.827	1.270	1.098	0.910	1.274	1.83E-01
P29590	403	S	Protein PML	PML	1	3.51E-11	147.51	KAS(1)PEAASTPR	2	-0.0097722	10	1.548	0.819	0.809	1.057	0.838	0.929	1.055	1.034	1.106	0.909	0.963	0.934	1.467	0.792	0.731	1.163	0.870	0.995	1.012	9.63E-01
P29590	40	S	Protein PML	PML	0.894733	3.69E-04	76.322	QPS(1)PS(0.045)PS(0.895)PT(0.061)ER	2	-0.28497	1		0.922	0.959	1.244	0.825	1.05	1.055	1.034	1.106	0.909	0.963	0.934		0.892	0.867	1.369	0.857	1.124	1.270	3.03E-01
P29590	36	S	Protein PML	PML	1	5.54E-12	150.89	QPS(1)PSPSPTER	2	1.1239	14	0.974	1.03	0.869	1.147	0.919	1.061	1.055	1.034	1.106	0.909	0.963	0.934	0.923	0.996	0.786	1.262	0.954	1.136	1.239	1.18E-01
P29590	518	S	Protein PML	PML	1	7.10E-08	108.13	AVS(1)PPHLDGPPS(1)PR	2	-0.57196	56	0.723	0.757	1.134	1.043	1.335	1.008	1.055	1.034	1.106	0.909	0.963	0.934	0.685	0.732	1.025	1.147	1.386	1.079	1.479	5.09E-02
P29590	505	S	Protein PML	PML	0.954824	1.53E-14	135.81	S(0.045)S(0.955)PEQPRPSTSK	2	0.048982	13	1.122	0.797	1.107	0.954	0.938	1.082	1.055	1.034	1.106	0.909	0.963	0.934	1.064	0.771	1.001	1.050	0.974	1.158	1.122	3.28E-01
P29590	8	S	Protein PML	PML	1	1.73E-29	111.81	MEPAPARS(1)PR	2	0.69546	29	0.8	1.026	0.914	0.931	1.37	0.959	1.055	1.034	1.106	0.909	0.963	0.934	0.758	0.992	0.826	1.024	1.423	1.027	1.348	1.16E-01
P29590	38	S	Protein PML	PML	0.997959	1.76E-04	91.712	QPSPS(0.998)PS(0.001)PT(0.001)ER	2	0.83006	3	1.057		0.832	1.111			1.055	1.034	1.106	0.909	0.963	0.934	1.002		0.752	1.222			1.394
P29590	527	S	Protein PML	PML	1	3.07E-08	108.13	AVS(1)PPHLDGPPS(1)PR	2	-0.57196	66	0.726	0.816	1.093	1.018	1.309	1.037	1.055	1.034	1.106	0.909	0.963	0.934	0.688	0.789	0.988	1.120	1.359	1.110	1.456	3.55E-02
P29590	530	S	Protein PML	PML	0.916267	3.07E-08	50.31	AVS(0.964)PPHLDGPPS(0.916)PRS(0.916)PVIGS(0.202)EVFLPNS(0.002)NHVASGAGEAEER	5	0.38255	9		0.227	1.006	1	1.447	1.319	1.055	1.034	1.106	0.909	0.963	0.934		0.220	0.910	1.100	1.503	1.412	2.371	8.28E-02
P29590	504	S	Protein PML	PML	0.868599	3.78E-14	129.53	S(0.869)S(0.131)PEQPRPSTSK	3	-0.28889	9	0.855	0.861	0.893		1.238	1.153	1.055	1.034	1.106	0.909	0.963	0.934	0.810	0.833	0.807		1.286	1.234	1.543	2.55E-04
P29692	162	S	Elongation factor 1-delta	EEF1D	1	1.60E-103	201.99	KPATPAEDDEDDDIDLFGS(1)DNEEEDKEAAQLR	5	0.55664	194	1.051	0.691	0.791	1.187	1.061	1.219	1.006	0.997	0.961	1.025	0.986	1.025	1.045	0.693	0.823	1.158	1.076	1.189	1.337	5.64E-02
P29692	133	S	Elongation factor 1-delta	EEF1D	0.999908	1.03E-32	169.64	ATAPQTQHVS(1)PMR	3	0.082052	57	0.701	1.551	0.907	0.7	1.291	0.851	1.006	0.997	0.961	1.025	0.986	1.025	0.697	1.556	0.944	0.683	1.309	0.830	0.883	7.15E-01
P29966	27	S	Myristoylated alanine-rich C-kinase substrate	MARCKS	0.989283	1.05E-35	164.42	GEAAAERPGEAAVAS(0.001)S(0.989)PS(0.01)K	2	0.2791	44	1.568	0.847	1.129	0.93	0.642	0.884	1.180	1.192	1.170	0.761	0.835	0.861	1.329	0.711	0.965	1.222	0.769	1.027	1.004	9.85E-01
P29966	118	S	Myristoylated alanine-rich C-kinase substrate	MARCKS	0.957468	5.76E-54	145.1	EAPAEGEAAEPGS(0.957)PT(0.043)AAEGEAASAASSTSSPK	2	-0.19238	35	0.964	0.506	0.643	0.462	0.809	2.617	1.180	1.192	1.170	0.761	0.835	0.861	0.817	0.424	0.550	0.607	0.969	3.039	2.577	2.87E-01
P29966	143	T	Myristoylated alanine-rich C-kinase substrate	MARCKS	0.999952	2.34E-05	92.932	AEDGAT(1)PS(0.755)PS(0.182)NET(0.062)PK	2	0.35968	3	0.712	1.3	1.136	0.871	0.982		1.180	1.192	1.170	0.761	0.835	0.861	0.603	1.091	0.971	1.145	1.176		1.306	2.47E-01
P29966	135	S	Myristoylated alanine-rich C-kinase substrate	MARCKS	0.77208	4.59E-39	120.97	EAPAEGEAAEPGSPTAAEGEAASAAS(0.021)S(0.015)T(0.033)S(0.158)S(0.772)PK	3	-0.03337	21	1.359	1.215	0.862	0.763	1.028	0.773	1.180	1.192	1.170	0.761	0.835	0.861	1.152	1.019	0.737	1.003	1.231	0.898	1.077	6.59E-01
P29966	81	S	Myristoylated alanine-rich C-kinase substrate	MARCKS	0.81406	3.59E-13	118.08	EEPAAAGSGAAS(0.814)PS(0.186)AAEK	2	0.76137	2	0.877				0.906	1.217	1.180	1.192	1.170	0.761	0.835	0.861	0.743				1.085	1.413	1.681
P29966	145	S	Myristoylated alanine-rich C-kinase substrate	MARCKS	0.995859	8.88E-16	130.38	AEDGATPS(0.996)PS(0.004)NETPK	2	-0.57764	17	1.139	0.954	1.539	0.845	0.882	0.64	1.180	1.192	1.170	0.761	0.835	0.861	0.965	0.800	1.315	1.110	1.056	0.743	0.945	7.79E-01
P29966	101	S	Myristoylated alanine-rich C-kinase substrate	MARCKS	1	3.92E-13	117.4	GEPAAAAAPEAGAS(1)PVEK	2	-0.042651	17	1.514	0.929	1.383	0.773	0.638	0.763	1.180	1.192	1.170	0.761	0.835	0.861	1.283	0.779	1.182	1.016	0.764	0.886	0.822	3.20E-01
P29966	150	T	Myristoylated alanine-rich C-kinase substrate	MARCKS	0.999954	9.34E-31	160.21	AEDGATPSPSNET(1)PK	2	0.035273	28	1.27	1.274	1.17	0.817	0.639	0.831	1.180	1.192	1.170	0.761	0.835	0.861	1.076	1.069	1.000	1.074	0.765	0.965	0.892	2.91E-01
P30050	38	S	60S ribosomal protein L12	RPL12	1	1.61E-05	120.55	IGPLGLS(1)PK	2	-0.34401	14	1.549	1.074	0.88	0.768	0.934	0.796	0.953	0.857	0.946	1.025	1.060	1.159	1.625	1.253	0.930	0.749	0.881	0.687	0.608	7.59E-02
P30260	364	S	Cell division cycle protein 27 homolog	CDC27	0.905212	2.04E-25	84.48	EVTPILAQTQSS(0.001)GPQT(0.001)S(0.001)T(0.001)T(0.001)PQVLS(0.905)PT(0.088)IT(0.002)SPPNALPR	4	-0.21116	6	0.944	0.866	1.015		1.137	1.039	0.936	1.066	1.072	0.959	1.042	0.924	1.009	0.812	0.947		1.091	1.124	1.201	9.22E-02
P30414	463	S	NK-tumor recognition protein	NKTR	0.992184	1.56E-02	47.037	ILIPS(0.992)DIES(0.004)S(0.004)K	2	-1.3044	1	1.026	1.07		0.922	1.097	0.885
P30414	379	S	NK-tumor recognition protein	NKTR	1	3.33E-10	151.79	AYRPPS(1)GEK	2	0.065294	8	0.8	0.977	1.261	1.149	0.812
P30414	1397	S	NK-tumor recognition protein	NKTR	0.995364	5.34E-02	48.229	S(0.001)S(0.001)S(0.003)Y(0.001)DPHS(0.995)R	2	1.5973	2	1.084			1.191	0.86	0.865
P30622	348	S	CAP-Gly domain-containing linker protein 1	CLIP1	0.997218	5.05E-39	185.85	KIS(0.997)GT(0.002)TALQEALK	2	-0.15258	8	1.805	1.037	0.777	0.801	0.896	0.684	0.936	0.939	0.977	1.057	1.025	1.066	1.928	1.104	0.795	0.758	0.874	0.642	0.594	2.07E-01
P30622	204	S	CAP-Gly domain-containing linker protein 1	CLIP1	0.999822	6.85E-32	159.77	TASESISNLSEAGS(1)IK	2	-0.56811	8	0.669	0.678	0.535	1.065	1.619	1.434	0.936	0.939	0.977	1.057	1.025	1.066	0.715	0.722	0.548	1.008	1.580	1.345	1.982	2.08E-02
P31350	33	T	Ribonucleoside-diphosphate reductase subunit M2	RRM2	0.999966	1.35E-12	114.63	GLSLVDKENT(1)PPALSGTR	3	0.39506	8	1.008	0.653	0.77	1.08	1.333	1.155	0.961	0.956	1.045	1.074	0.966	0.998	1.049	0.683	0.737	1.006	1.380	1.157	1.435	8.55E-02
P31350	20	S	Ribonucleoside-diphosphate reductase subunit M2	RRM2	1	3.51E-26	146.97	VPLAPITDPQQLQLS(1)PLK	2	-0.0097918	15	0.562	0.584	1.167	1.186	1.271	1.23	0.961	0.956	1.045	1.074	0.966	0.998	0.585	0.611	1.117	1.104	1.316	1.232	1.579	7.19E-02
P31641	25	S	Sodium- and chloride-dependent taurine transporter	SLC6A6	0.999335	3.65E-09	101.75	S(0.999)PGT(0.001)RPEDEAEGKPPQR	3	0.8049	1	0.98	1.462	1.027	0.747		0.783	1.110	1.315	0.969			0.606	0.883	1.112	1.060			1.292	1.269
P31943	104	S	Heterogeneous nuclear ribonucleoprotein H	HNRNPH1	0.999998	3.13E-111	269.34	HTGPNS(1)PDTANDGFVR	2	0.54359	37	1.019	1.106	0.743	0.939	1.33	0.863	0.987	0.921	1.036	1.009	1.018	1.030	1.032	1.201	0.717	0.931	1.306	0.838	1.042	8.47E-01
P31943	310	S	Heterogeneous nuclear ribonucleoprotein H	HNRNPH1	0.999953	1.62E-06	79.467	ATENDIYNFFS(1)PLNPVR	3	0.13246	4		0.995	1.275	0.932		0.797	0.987	0.921	1.036	1.009	1.018	1.030		1.080	1.231	0.924		0.774	0.735	1.02E-01
P31947	74	S	14-3-3 protein sigma	SFN	0.999996	2.44E-04	76.051	SNEEGS(1)EEKGPEVR	2	-0.63221	3	0.639			0.984	1.441	0.935	0.755	0.961	0.848	1.122	1.158	1.156	0.846			0.877	1.244	0.809	1.154
P31948	481	S	Stress-induced-phosphoprotein 1	STIP1	1	5.60E-14	180.81	HDS(1)PEDVKR	2	-0.33633	38	1.113	1.218	1.224	0.833	0.938	0.674	0.987	0.979	0.986	0.991	0.983	1.074	1.128	1.244	1.241	0.841	0.954	0.628	0.670	1.83E-02
P32519	163	S	ETS-related transcription factor Elf-1	ELF1	0.992901	5.24E-05	76.526	Y(0.007)ADS(0.993)PGAS(0.27)S(0.73)PEQPK	2	-0.10066	1		1.439	0.966	0.801	1.02	0.775	0.798	1.105	0.935	1.061	1.117	0.984		1.302	1.033	0.755	0.913	0.788	0.701	5.97E-02
P32519	168	S	ETS-related transcription factor Elf-1	ELF1	0.932116	2.29E-22	150.92	YADSPGAS(0.068)S(0.932)PEQPK	2	1.4016	12	0.975	0.879	1.236	0.989	1.031	0.891	0.798	1.105	0.935	1.061	1.117	0.984	1.222	0.795	1.322	0.932	0.923	0.905	0.827	2.99E-01
P32519	187	S	ETS-related transcription factor Elf-1	ELF1	0.991149	9.91E-08	92.8	TKPPRPDS(0.991)PAT(0.006)T(0.002)PNISVK	3	-0.029311	6		0.983	1.211	0.999		0.807	0.798	1.105	0.935	1.061	1.117	0.984		0.890	1.295	0.942		0.820	0.806	4.23E-01
P33176	933	S	Kinesin-1 heavy chain	KIF5B	0.998665	1.06E-46	176.57	PIRPGQHPAAS(0.999)PT(0.001)HPSAIR	3	-0.53075	43	0.668	1	0.739	0.977	1.385	1.232	0.980	0.937	0.934	0.987	1.109	1.052	0.682	1.067	0.791	0.990	1.249	1.171	1.342	1.04E-01
P33991	120	S	DNA replication licensing factor MCM4	MCM4	1	2.54E-09	134.01	QRPDLGS(1)AQK	2	-0.064808	4	0.44	1.884	2.664	0.355	0.422	0.234	1.047	1.059	1.095	0.991	0.940	0.867	0.420	1.779	2.433	0.358	0.449	0.270	0.233	1.17E-01
P34897	266	S	Serine hydroxymethyltransferase, mitochondrial	SHMT2	1	5.35E-03	78.113	VIPS(1)PFK	2	-0.23782	12	1.109	0.803	0.991	1.114	0.944	1.039	1.030	1.027	1.047	0.972	1.022	0.903	1.077	0.782	0.947	1.146	0.924	1.151	1.148	2.90E-01
P34932	76	S	Heat shock 70 kDa protein 4	HSPA4	1	3.56E-08	111.88	AFS(1)DPFVEAEK	2	-0.62267	8	1.11	1.104	0.852	0.901	1.185	0.849	0.986	0.971	0.975	1.024	1.007	1.037	1.126	1.137	0.874	0.880	1.177	0.819	0.917	5.68E-01
P35221	652	S	Catenin alpha-1	CTNNA1	0.924554	1.28E-35	165.66	S(0.925)RT(0.115)S(0.96)VQT(1)EDDQLIAGQSAR	2	-0.46153	21	1.025	1.406	1.393	0.528	0.584	1.064	1.033	1.045	1.011	0.979	0.977	0.956	0.992	1.345	1.378	0.539	0.598	1.113	0.606	9.07E-02
P35221	641	S	Catenin alpha-1	CTNNA1	1	2.18E-123	266.62	TPEELDDS(1)DFETEDFDVR	2	-0.38605	162	1.196	1.024	0.993	0.985	0.923	0.879	1.033	1.045	1.011	0.979	0.977	0.956	1.158	0.980	0.982	1.006	0.945	0.919	0.920	2.65E-01
P35221	654	T	Catenin alpha-1	CTNNA1	0.763558	1.28E-35	165.66	S(0.286)RT(0.764)S(0.951)VQT(1)EDDQLIAGQSAR	3	-0.59765	26	1.018	0.915	0.945	1.058	1.092	0.973	1.033	1.045	1.011	0.979	0.977	0.956	0.985	0.876	0.935	1.081	1.118	1.018	1.150	3.14E-02
P35221	655	S	Catenin alpha-1	CTNNA1	0.974334	1.28E-35	165.66	S(0.339)RT(0.687)S(0.974)VQT(1)EDDQLIAGQSAR	2	-1.1052	26	1.049	0.387	1.126	1.127	1.222	1.089	1.033	1.045	1.011	0.979	0.977	0.956	1.015	0.370	1.114	1.151	1.251	1.139	1.417	2.15E-01
P35221	658	T	Catenin alpha-1	CTNNA1	0.999999	1.56E-18	125.86	S(0.339)RT(0.687)S(0.974)VQT(1)EDDQLIAGQSAR	2	-1.1052	27	0.934	0.823	0.877	1.109	1.25	1.008	1.033	1.045	1.011	0.979	0.977	0.956	0.904	0.788	0.867	1.133	1.279	1.054	1.355	1.53E-02
P35222	191	S	Catenin beta-1	CTNNB1	1	1.28E-09	135.47	S(1)PQMVSAIVR	2	-0.071023	15	1.338	1.171	1.199	0.738	0.894	0.66	1.063	1.068	1.096	0.957	0.888	0.928	1.259	1.096	1.094	0.771	1.007	0.711	0.722	3.85E-02
P35222	552	S	Catenin beta-1	CTNNB1	0.992007	1.95E-23	143.09	RT(0.008)S(0.992)MGGTQQQFVEGVR	2	1.36	58	1.159	1.172	1.508	0.57	0.94	0.651	1.063	1.068	1.096	0.957	0.888	0.928	1.090	1.097	1.376	0.596	1.059	0.702	0.661	7.54E-02
P35251	67	Y	Replication factor C subunit 1	RFC1	0.822869	1.12E-04	66.246	IIY(0.823)DS(0.523)DS(0.491)ES(0.16)EET(0.003)LQVK	3	-0.32465	8		0.807	0.706	1.309	1.25	0.928	1.080	1.017	0.892	1.056	1.011	0.944		0.794	0.791	1.240	1.236	0.983	1.455	4.62E-02
P35251	190	S	Replication factor C subunit 1	RFC1	0.999347	2.23E-07	87.319	ELS(0.999)QNT(0.001)DESGLNDEAIAK	2	0.39167	5	0.355		0.376	1.206	1.821	1.242	1.080	1.017	0.892	1.056	1.011	0.944	0.329		0.422	1.142	1.801	1.316	3.785	2.69E-02
P35251	156	S	Replication factor C subunit 1	RFC1	1	4.29E-05	113.44	NKPLS(1)PIK	2	0.14453	20	1.068	0.98	0.907	0.98	1.001	1.064	1.080	1.017	0.892	1.056	1.011	0.944	0.989	0.964	1.017	0.928	0.990	1.127	1.026	6.98E-01
P35251	71	S	Replication factor C subunit 1	RFC1	0.988654	5.61E-23	141.13	IIY(0.002)DS(0.006)DS(0.989)ES(0.003)EETLQVK	3	0.31595	44	1.3	0.891	0.991	0.962	0.851	1.005	1.080	1.017	0.892	1.056	1.011	0.944	1.204	0.876	1.111	0.911	0.842	1.065	0.883	3.50E-01
P35251	368	S	Replication factor C subunit 1	RFC1	0.999969	8.74E-43	214.73	KESVS(1)PEDSEK	2	-0.0029981	8	0.835	1.016	1.459	0.808	1.032	0.85	1.080	1.017	0.892	1.056	1.011	0.944	0.773	0.999	1.636	0.765	1.021	0.900	0.788	4.21E-01
P35251	69	S	Replication factor C subunit 1	RFC1	0.984355	2.53E-07	96.55	IIY(0.018)DS(0.984)DS(0.969)ES(0.028)EETLQVK	2	-1.3454	17	0.999	0.782	0.861	1.043	1.066	1.249	1.080	1.017	0.892	1.056	1.011	0.944	0.925	0.769	0.965	0.988	1.054	1.323	1.265	1.18E-01
P35251	73	S	Replication factor C subunit 1	RFC1	0.91183	4.14E-04	57.41	IIY(0.001)DS(0.002)DS(0.021)ES(0.912)EET(0.065)LQVK	2	-2.1512	3		1.062	1.208		0.731		1.080	1.017	0.892	1.056	1.011	0.944		1.044	1.354		0.723		0.603
P35251	29	S	Replication factor C subunit 1	RFC1	0.999611	2.63E-05	117.03	TKS(1)DEETLK	2	0.5113	2	1.163	1.068		1.311	0.921	0.538	1.080	1.017	0.892	1.056	1.011	0.944	1.077	1.050		1.241	0.911	0.570	0.853	5.77E-01
P35269	221	S	General transcription factor IIF subunit 1	GTF2F1	0.832673	1.04E-10	73.603	IHDLEDDLEMS(0.004)S(0.004)DAS(0.833)DAS(0.16)GEEGGR	3	-1.9416	1		1.445	1.317		0.51	0.728	0.987	0.973	0.996	1.007	0.983	1.054		1.485	1.322		0.519	0.691	0.431	2.13E-02
P35269	385	S	General transcription factor IIF subunit 1	GTF2F1	0.999988	2.16E-39	160.04	GNS(1)RPGT(0.997)PS(0.003)AEGGSTSSTLR	3	0.23018	21	0.95	0.866	0.882	1.221	1.256	0.825	0.987	0.973	0.996	1.007	0.983	1.054	0.963	0.890	0.886	1.213	1.278	0.783	1.195	3.20E-01
P35269	389	T	General transcription factor IIF subunit 1	GTF2F1	0.999283	1.35E-16	118.15	PGT(0.999)PS(0.001)AEGGSTSSTLR	2	-1.207	24	0.447	0.463	1.296	1.403	1.31	1.08	0.987	0.973	0.996	1.007	0.983	1.054	0.453	0.476	1.301	1.393	1.333	1.025	1.682	1.68E-01
P35367	275	S	Histamine H1 receptor	HRH1	0.920152	9.08E-06	92.133	DAGGGSVLKS(0.92)PS(0.07)QT(0.009)PK	2	-1.2535	3	0.569	0.631	0.809	0.817	2.069	1.105
P35568	348	S	Insulin receptor substrate 1	IRS1	0.991066	2.00E-50	196.71	PASVDGSPVS(0.991)PS(0.003)T(0.006)NR	2	-0.41772	5	0.945	0.909	0.682	1.056	1.243	1.165				1.000						1.056
P35568	453	T	Insulin receptor substrate 1	IRS1	0.960879	7.03E-03	58.848	S(0.003)VT(0.032)PDS(0.004)LGHT(0.961)PPAR	2	1.6105	3	0.911	0.742	0.62	1.068		1.658				1.000						1.068
P35568	3	S	Insulin receptor substrate 1	IRS1	0.999974	1.57E-04	72.891	AS(1)PPESDGFSDVR	2	0.62194	5	0.971	1.009	1.084			0.937				1.000
P35568	1078	S	Insulin receptor substrate 1	IRS1	1	2.82E-03	131.22	VNLS(1)PNR	2	0.43389	8	1.039	1.333	0.825	0.789	1.034	0.98				1.000						0.789
P35568	531	S	Insulin receptor substrate 1	IRS1	0.969487	3.00E-05	82.406	THSAGT(0.029)S(0.969)PT(0.001)ITHQK	3	0.45751	2	1.441	0.689			1.085	0.785				1.000
P35579	1943	S	Myosin-9	MYH9	1	1.10E-114	278.08	KGAGDGS(1)DEEVDGKADGAEAK	3	0.034575	36	0.849	0.712	0.921		1.426	1.092	0.855	0.851	0.842	1.138	1.136	1.178	0.993	0.837	1.094		1.255	0.927	1.120	5.09E-01
P35606	859	S	Coatomer subunit beta'	COPB2	0.995767	1.49E-54	166.97	STAQQELDGKPAS(0.996)PT(0.004)PVIVASHTANK	3	0.046021	84	0.95	1.119	1.107	1.112	0.908	0.804	0.987	0.985	0.948	1.007	0.979	1.094	0.963	1.136	1.168	1.104	0.927	0.735	0.847	2.51E-01
P35611	12	S	Alpha-adducin	ADD1	0.951949	2.65E-05	87.388	AAVVT(0.047)S(0.952)PPPT(0.001)TAPHK	2	-0.19414	11	0.616	0.795			1.806	0.783	0.983	0.988	0.943	1.046	1.000	1.041	0.627	0.805			1.806	0.752	1.787	4.02E-01
P35611	358	S	Alpha-adducin	ADD1	0.999979	1.92E-60	212.37	SPGS(1)PVGEGTGSPPK	2	-0.32763	4	0.838	0.865	1.121	1.097	1.241	0.838	0.983	0.988	0.943	1.046	1.000	1.041	0.852	0.876	1.189	1.049	1.241	0.805	1.061	7.39E-01
P35613	362	S	Basigin	BSG	1	6.42E-45	173.45	RKPEDVLDDDDAGS(1)APLK	3	2.0757	23	0.972	1.204	0.884	0.968	1.218	0.754	1.050	0.990	1.038	1.004	0.917	1.001	0.926	1.216	0.852	0.964	1.328	0.753	1.017	9.35E-01
P35658	646	S	Nuclear pore complex protein Nup214	NUP214	0.989663	1.50E-04	89.613	SSVLPS(0.99)PS(0.01)GR	2	-0.17421	9		0.744	0.642	1.174	1.226	1.215	1.067	1.079	1.093	0.885	0.959	0.917		0.690	0.587	1.327	1.278	1.325	2.052	5.78E-04
P35658	437	T	Nuclear pore complex protein Nup214	NUP214	0.996869	1.24E-24	141.07	SPGSTPT(0.003)T(0.997)PTSSQAPQK	2	1.0986	22	1.128	1.186	1.307	0.93	0.832	0.618	1.067	1.079	1.093	0.885	0.959	0.917	1.057	1.099	1.196	1.051	0.868	0.674	0.773	9.50E-02
P35658	430	S	Nuclear pore complex protein Nup214	NUP214	0.990182	6.50E-13	118.19	S(0.99)PGS(0.01)TPTTPTSSQAPQK	2	0.41301	13	1.038	0.904	1.08	0.916	1.482	0.581	1.067	1.079	1.093	0.885	0.959	0.917	0.973	0.838	0.988	1.035	1.545	0.634	1.148	6.33E-01
P35658	657	S	Nuclear pore complex protein Nup214	NUP214	0.761946	1.19E-04	76.526	SAQGS(0.01)S(0.227)S(0.762)PVPS(0.001)MVQK	2	0.26493	2	1.036	0.733	1.113		0.974	1.144	1.067	1.079	1.093	0.885	0.959	0.917	0.971	0.679	1.018		1.016	1.248	1.272	2.32E-01
P35658	433	S	Nuclear pore complex protein Nup214	NUP214	0.958384	9.97E-26	147.64	S(0.001)PGS(0.958)T(0.041)PTTPTSSQAPQK	2	-1.6794	23	1.041	1.301	1.625	0.905	0.601	0.528	1.067	1.079	1.093	0.885	0.959	0.917	0.976	1.206	1.487	1.023	0.627	0.576	0.607	7.82E-02
P35658	678	S	Nuclear pore complex protein Nup214	NUP214	1	7.64E-15	125.61	IT(1)PPAAKPGS(1)PQAK	3	0.92541	23	1.468	0.837	1.013	0.973	0.881	0.828	1.067	1.079	1.093	0.885	0.959	0.917	1.376	0.776	0.927	1.099	0.919	0.903	0.949	7.97E-01
P35658	940	S	Nuclear pore complex protein Nup214	NUP214	1	2.51E-05	119.43	VPAKLS(1)PMK	2	-0.16253	11	0.982	1.488	1.057	0.7	1.106	0.668	1.067	1.079	1.093	0.885	0.959	0.917	0.920	1.379	0.967	0.791	1.153	0.728	0.818	3.72E-01
P35659	306	S	Protein DEK	DEK	0.999994	1.86E-57	200.74	KESESEDS(1)S(1)DDEPLIK	2	0.33476	54	1.5	1.778	1.098	0.527	0.687	0.411	1.047	1.097	1.029	0.962	0.914	0.952	1.433	1.621	1.067	0.548	0.752	0.432	0.420	1.32E-02
P35659	251	S	Protein DEK	DEK	1	1.92E-95	230.03	NKEESSDDEDKES(1)EEEPPK	3	0.32014	30	0.993	1.416	1.856	0.593	0.798	0.344	1.047	1.097	1.029	0.962	0.914	0.952	0.948	1.291	1.804	0.616	0.873	0.361	0.458	6.49E-02
P35659	303	S	Protein DEK	DEK	0.878225	3.31E-05	83.404	ES(0.1)ES(0.878)EDS(0.259)S(0.763)DDEPLIK	2	-0.020277	5			1.01			0.99	1.047	1.097	1.029	0.962	0.914	0.952			0.982			1.040	1.059
P35659	307	S	Protein DEK	DEK	0.999998	2.70E-126	279.96	KESESEDS(1)S(1)DDEPLIK	2	0.33476	111	1.602	1.254	0.971	0.733	0.739	0.701	1.047	1.097	1.029	0.962	0.914	0.952	1.530	1.143	0.944	0.762	0.809	0.736	0.638	6.55E-02
P35659	231	S	Protein DEK	DEK	0.882766	4.25E-45	176.85	CPEILSDES(0.004)S(0.883)S(0.113)DEDEKK	2	-1.0103	6	1.581			0.833		0.586	1.047	1.097	1.029	0.962	0.914	0.952	1.510			0.866		0.616	0.491
P35659	13	T	Protein DEK	DEK	0.993716	1.72E-54	159.89	SASAPAAEGEGT(0.994)PT(0.006)QPASEKEPEMPGPR	2	-1.043	32	1.107	1.235	1.036	0.658	1.274	0.69	1.047	1.097	1.029	0.962	0.914	0.952	1.057	1.126	1.007	0.684	1.394	0.725	0.879	6.09E-01
P35680	257	S	Hepatocyte nuclear factor 1-beta	HNF1B	1	5.28E-02	51.727	QKNPS(1)KEER	2	0.58664	1	0.958		1.525	0.563	1.263	0.691
P36507	295	S	Dual specificity mitogen-activated protein kinase kinase 2	MAP2K2	0.897449	7.30E-29	130.25	PVVDGEEGEPHS(0.103)IS(0.897)PR	3	0.83153	14	1.362	0.709	0.797	1.183		0.949	0.904	0.866	0.973	1.056	1.085	1.116	1.507	0.819	0.819	1.120		0.850	0.940	8.54E-01
P36507	394	T	Dual specificity mitogen-activated protein kinase kinase 2	MAP2K2	0.82676	4.25E-06	142.97	LNQPGT(0.827)PT(0.173)R	2	0.19489	9	0.955	1.244	0.993	0.957		0.852	0.904	0.866	0.973	1.056	1.085	1.116	1.056	1.436	1.021	0.906		0.763	0.713	1.58E-01
P36578	9	S	60S ribosomal protein L4	RPL4	0.997015	2.11E-02	50.354	PLIS(0.997)VYS(0.003)EK	2	0.941	1	1.006		0.776	0.94	0.881	1.397	0.947	0.965	1.023	0.978	1.008	1.079	1.062		0.759	0.961	0.874	1.295	1.146	5.55E-01
P36578	295	S	60S ribosomal protein L4	RPL4	1	4.02E-10	166.69	ILKS(1)PEIQR	2	-0.28087	25	1.111	0.789	0.893	1.071	1.26	0.877	0.947	0.965	1.023	0.978	1.008	1.079	1.173	0.818	0.873	1.095	1.250	0.813	1.103	5.93E-01
P36873	307	T	Serine/threonine-protein phosphatase PP1-gamma catalytic subunit	PPP1CC	0.9091	2.45E-06	96.135	KPNAT(0.909)RPVT(0.091)PPR	3	-0.054741	1	0.68		0.766		1.554		1.017	0.920	1.117	0.998	0.952	0.996	0.669		0.686		1.632		2.410
P36873	311	T	Serine/threonine-protein phosphatase PP1-gamma catalytic subunit	PPP1CC	0.918909	1.93E-02	43.69	KPNAT(0.081)RPVT(0.919)PPR	3	0.024321	1		0.887	1.471			0.642	1.017	0.920	1.117	0.998	0.952	0.996		0.964	1.317			0.645	0.565
P36915	51	S	Guanine nucleotide-binding protein-like 1	GNL1	0.981757	1.49E-45	170.61	EEQTDT(0.018)S(0.982)DGESVTHHIR	3	0.33623	36	0.936	0.984	1.073	0.89	1.455	0.662	0.845	0.950	1.005	1.045	1.073	1.082	1.108	1.036	1.068	0.852	1.356	0.612	0.878	5.85E-01
P37173	553	S	TGF-beta receptor type-2	TGFBR2	0.762619	8.00E-05	55.322	S(0.237)CS(0.763)EEKIPEDGSLNTTK	3	-0.73109	1	0.958	0.892				1.15						1.000						1.150
P37173	548	S	TGF-beta receptor type-2	TGFBR2	1	2.03E-10	120.7	FSELEHLDRLS(1)GR	3	0.68085	10	1.012	1.008	0.946	1.055	1.145	0.835						1.000						0.835
P37198	408	S	Nuclear pore glycoprotein p62	NUP62	1	2.13E-02	40.693	ELEDLLS(1)PLEELVK	2	3.2055	1	1.374	1.168	0.648		1.332	0.479	1.092	0.987	0.960	0.906	1.018	1.037	1.258	1.183	0.675		1.308	0.462	0.852	7.23E-01
P38159	189	S	RNA-binding motif protein, X chromosome	RBMX	0.999412	3.15E-04	86.498	GRDS(0.999)Y(0.001)GGPPR	2	-3.9978	3	0.996	0.833	0.821	1.089	1.079	1.182	1.076	1.083	1.046	0.890	0.959	0.946	0.926	0.769	0.785	1.224	1.125	1.249	1.451	3.97E-03
P38159	261	S	RNA-binding motif protein, X chromosome	RBMX	0.99974	2.29E-02	71.558	GYS(1)DRDGYGR	2	1.0632	1	0.733	1.18	1.219	0.997		0.871	1.076	1.083	1.046	0.890	0.959	0.946	0.681	1.090	1.165	1.120		0.921	1.043	8.54E-01
P38159	280	S	RNA-binding motif protein, X chromosome	RBMX	0.961839	1.73E-04	72.075	DRDYSDHPS(0.038)GGS(0.962)YR	3	-0.24038	4	0.081	2.268	0.921	0.91	0.819		1.076	1.083	1.046	0.890	0.959	0.946	0.075	2.094	0.880	1.022	0.854		0.923	9.24E-01
P38159	332	S	RNA-binding motif protein, X chromosome	RBMX	0.999878	4.38E-03	64.103	S(1)DLYSSGR	2	0.53538	2	0.89	0.91	0.872	0.995	1.109	1.224	1.076	1.083	1.046	0.890	0.959	0.946	0.827	0.840	0.834	1.118	1.156	1.294	1.427	2.66E-03
P38159	273	S	RNA-binding motif protein, X chromosome	RBMX	0.997838	5.63E-13	122.14	DRDY(0.002)S(0.998)DHPSGGSYR	2	0.51626	4	0.972		0.997		1.031		1.076	1.083	1.046	0.890	0.959	0.946	0.903		0.953		1.075		1.158
P38159	208	S	RNA-binding motif protein, X chromosome	RBMX	0.999999	3.82E-03	113.71	DVYLS(1)PR	2	0.066379	20	1.329	1	1.124	0.876	0.792	0.879	1.076	1.083	1.046	0.890	0.959	0.946	1.235	0.923	1.075	0.984	0.826	0.929	0.847	1.79E-01
P38159	287	S	RNA-binding motif protein, X chromosome	RBMX	0.9694	4.67E-03	60.157	DS(0.004)Y(0.017)ES(0.969)YGNS(0.009)R	2	-0.19806	3	1.08	0.796	0.95	1.219	1.338	0.616	1.076	1.083	1.046	0.890	0.959	0.946	1.004	0.735	0.908	1.370	1.395	0.651	1.291	3.74E-01
P38159	249	S	RNA-binding motif protein, X chromosome	RBMX	0.909975	1.32E-07	108.18	DYGHS(0.91)S(0.078)S(0.012)RDDYPSR	3	0.0029027	5			0.914		0.964	1.121	1.076	1.083	1.046	0.890	0.959	0.946			0.874		1.005	1.185	1.253
P38159	277	S	RNA-binding motif protein, X chromosome	RBMX	0.859846	1.96E-04	70.373	DRDY(0.053)S(0.067)DHPS(0.86)GGS(0.019)Y(0.001)R	3	0.12199	3	0.873	1.083				1.044	1.076	1.083	1.046	0.890	0.959	0.946	0.811	1.000				1.104	1.219
P38159	88	S	RNA-binding motif protein, X chromosome	RBMX	0.996332	3.83E-43	170.35	VEQATKPS(0.996)FES(0.004)GR	3	0.061096	19	0.992	0.792	1.09	0.851	1.244	1.031	1.076	1.083	1.046	0.890	0.959	0.946	0.922	0.731	1.042	0.956	1.297	1.090	1.240	1.83E-01
P38159	352	S	RNA-binding motif protein, X chromosome	RBMX	1	8.52E-04	121.6	GLPPS(1)MER	2	0.12686	164	0.954	0.813	0.759	1.222	1.175	1.077	1.076	1.083	1.046	0.890	0.959	0.946	0.887	0.751	0.726	1.373	1.225	1.138	1.581	5.69E-03
P38398	398	S	Breast cancer type 1 susceptibility protein	BRCA1	0.911983	4.27E-06	57.768	SDELLGS(0.07)DDS(0.912)HDGES(0.013)ES(0.005)NAK	3	0.47612	2			0.576		1.424		0.918	0.903	0.589	1.244	1.095	1.251			0.978		1.300		1.330
P38398	1342	S	Breast cancer type 1 susceptibility protein	BRCA1	1	1.65E-03	74.611	ELVS(1)DDEER	2	0.11567	3		0.984	1.133	1.004		0.879	0.918	0.903	0.589	1.244	1.095	1.251		1.090	1.924	0.807		0.703	0.501	2.15E-01
P38398	1524	S	Breast cancer type 1 susceptibility protein	BRCA1	0.989932	1.29E-03	70.089	NY(0.01)PS(0.99)QEELIK	2	0.77483	6	1.067	0.911		1.023			0.918	0.903	0.589	1.244	1.095	1.251	1.162	1.009		0.822			0.758
P38398	1286	S	Breast cancer type 1 susceptibility protein	BRCA1	0.996737	4.58E-10	116.87	AS(0.002)QEHHLS(0.997)EET(0.001)K	2	-1.509	3	1.429		1.107		0.81	0.654	0.918	0.903	0.589	1.244	1.095	1.251	1.557		1.879		0.740	0.523	0.367	3.06E-02
P38398	1280	S	Breast cancer type 1 susceptibility protein	BRCA1	0.999991	2.06E-05	86.497	AS(1)QEHHLSEETK	3	0.19093	6	1.289	0.601	1.326	1.11	0.887	0.787	0.918	0.903	0.589	1.244	1.095	1.251	1.404	0.666	2.251	0.892	0.810	0.629	0.540	2.27E-01
P38398	1189	S	Breast cancer type 1 susceptibility protein	BRCA1	0.998146	1.11E-11	92.633	GELS(0.998)RS(0.998)PS(0.998)PFT(0.005)HT(0.001)HLAQGYR	4	0.076229	5	1.447	1.193	0.818	0.7	1.035	0.806	0.918	0.903	0.589	1.244	1.095	1.251	1.576	1.321	1.389	0.563	0.945	0.644	0.502	6.92E-03
P38398	434	S	Breast cancer type 1 susceptibility protein	BRCA1	1	7.16E-05	76.378	IDLLAS(1)DPHEALICK	3	-0.13575	1	1.275				0.725		0.918	0.903	0.589	1.244	1.095	1.251	1.389				0.662		0.477
P38398	1191	S	Breast cancer type 1 susceptibility protein	BRCA1	0.998152	1.11E-11	92.633	GELS(0.998)RS(0.998)PS(0.998)PFT(0.005)HT(0.001)HLAQGYR	4	0.076229	5	1.447	1.193	0.818	0.7	1.035	0.806	0.918	0.903	0.589	1.244	1.095	1.251	1.576	1.321	1.389	0.563	0.945	0.644	0.502	6.92E-03
P38398	1009	S	Breast cancer type 1 susceptibility protein	BRCA1	0.982797	9.32E-07	95.5	NLLEENFEEHS(0.017)MS(0.983)PER	3	0.2218	4	1.402	1.044	0.746		1.09	0.718	0.918	0.903	0.589	1.244	1.095	1.251	1.527	1.156	1.267		0.995	0.574	0.596	8.68E-02
P38398	1187	S	Breast cancer type 1 susceptibility protein	BRCA1	0.997923	1.11E-11	92.633	GELS(0.998)RS(0.998)PS(0.998)PFT(0.005)HT(0.001)HLAQGYR	4	0.076229	5	1.447	1.193	0.818	0.7	1.035	0.806	0.918	0.903	0.589	1.244	1.095	1.251	1.576	1.321	1.389	0.563	0.945	0.644	0.502	6.92E-03
P38432	456	T	Coilin	COIL	0.999921	8.56E-05	91.414	NSSTIIQNPVET(1)PKK	2	0.2672	2	0.959	1.155	1.391			0.495	0.927	1.098	1.150	0.867	1.006	0.952	1.035	1.052	1.210			0.520	0.473
P38432	303	T	Coilin	COIL	0.9713	2.03E-03	91.245	LGFS(0.003)LT(0.971)PS(0.026)K	2	0.84976	3	1.276	0.999	0.929		0.797		0.927	1.098	1.150	0.867	1.006	0.952	1.376	0.910	0.808		0.792		0.768
P38432	487	S	Coilin	COIL	0.80057	2.19E-07	100.02	LLELT(0.006)S(0.175)S(0.801)YS(0.018)PDVSDYK	2	-0.51367	5		0.681			1.165	1.154	0.927	1.098	1.150	0.867	1.006	0.952		0.620			1.158	1.212	1.911
P38432	122	T	Coilin	COIL	1	3.21E-17	108.18	AFQLEEGEET(1)EPDCK	2	-0.56734	4	0.759	1.312	1.067	0.863			0.927	1.098	1.150	0.867	1.006	0.952	0.819	1.195	0.928	0.995			1.015
P38919	163	T	Eukaryotic initiation factor 4A-III	EIF4A3	0.99999	1.46E-04	71.148	KLDYGQHVVAGT(1)PGR	3	0.27342	1		0.932			1.068		1.015	1.034	1.069	0.961	0.942	0.980		0.901			1.134		1.258
P39023	304	S	60S ribosomal protein L3	RPL3	0.89892	4.06E-10	101.3	NNAS(0.899)T(0.101)DYDLSDK	2	0.70475	3	0.678	0.806		1.508	1.056	0.953	0.980	0.990	0.942	1.043	0.987	1.057	0.692	0.814		1.446	1.070	0.902	1.513	1.67E-01
P39880	1237	S	Homeobox protein cut-like 1	CUX1	0.943819	4.49E-16	70.281	HSSVSDSQPCEPPS(0.003)VGT(0.006)EY(0.002)S(0.045)QGAS(0.944)PQPQHQLK	4	0.29207	2			1.333		0.667		1.074	1.011	1.072	0.951	0.950	0.942			1.243		0.702		0.565
P39880	1270	S	Homeobox protein cut-like 1	CUX1	1	4.01E-19	176.87	AYQQKPYPS(1)PK	2	3.0264	33	1.108	1.002	0.851	1.054	0.715	1.269	1.074	1.011	1.072	0.951	0.950	0.942	1.032	0.991	0.794	1.108	0.753	1.347	1.139	5.25E-01
P40189	667	S	Interleukin-6 receptor subunit beta	IL6ST	0.999382	3.21E-10	116.58	SHIAQWS(0.999)PHT(0.001)PPR	3	-0.70702	13		0.847	1.32	1.05	0.785	0.998
P40222	515	S	Alpha-taxilin	TXLNA	0.994347	1.22E-39	190.74	RPEGPGAQAPS(0.006)S(0.994)PR	2	0.12412	28	0.816	1.231	1.117	0.74	1.292	0.805	0.942	0.949	0.937	1.127	0.930	1.114	0.866	1.297	1.192	0.657	1.389	0.723	0.825	5.05E-01
P40425	330	S	Pre-B-cell leukemia transcription factor 2	PBX2	0.964783	1.71E-04	78.95	TAVS(0.012)VT(0.023)QGGHS(0.965)R	2	1.1565	2	0.953	1.121		1.11	0.816
P40763	727	S	Signal transducer and activator of transcription 3	STAT3	0.999576	1.22E-09	80.835	FICVTPTTCSNTIDLPMS(1)PR	3	-3.4638	3			0.718	1.21	1.15	0.922	1.013	1.022	0.895	1.030	1.010	1.030			0.802	1.175	1.139	0.895	1.333
P40818	718	S	Ubiquitin carboxyl-terminal hydrolase 8	USP8	0.826532	1.48E-12	120.4	S(0.02)YS(0.827)S(0.152)PDITQAIQEEEK	2	-1.2153	8	1.547		1.098	0.716	1.047	0.591	0.726			1.183		1.091	2.131			0.605		0.542	0.269
P40818	577	T	Ubiquitin carboxyl-terminal hydrolase 8	USP8	1	1.64E-02	72.29	RCPT(1)PEIQK	2	0.65701	3	0.833		1.181	0.821	1.509	0.657	0.726			1.183		1.091	1.147			0.694		0.602	0.565
P40855	147	S	Peroxisomal biogenesis factor 19	PEX19	0.803486	8.77E-13	115.63	NATDLQNS(0.172)S(0.803)MS(0.025)EEELTK	2	1.0653	4	1.114	1.139	0.929	0.805	1.15	0.862	0.971	1.089	1.093	0.914	0.955	0.977	1.147	1.046	0.850	0.881	1.204	0.882	0.975	8.64E-01
P40925	241	S	Malate dehydrogenase, cytoplasmic	MDH1	0.967554	5.79E-05	101.71	KLS(0.968)S(0.032)AMS(0.001)AAK	2	0.0028522	6	0.647	1.42	1.124	0.889	1.063	0.857	1.006	1.019	0.958	1.062	0.970	0.984	0.643	1.394	1.173	0.837	1.096	0.871	0.874	5.99E-01
P41208	20	S	Centrin-2	CETN2	1	2.66E-21	148.46	MS(1)PKPELTEEQK	2	1.169	38	0.753	1.231	1.118	0.801	1.33	0.767	0.962		1.117	0.921			0.783		1.001	0.870			0.975
P41212	22	S	Transcription factor ETV6	ETV6	0.99661	4.06E-16	84.561	IS(0.187)Y(0.015)T(0.8)PPES(0.997)PVPS(0.001)YASSTPLHVPVPR	3	-0.36975	14	0.721	1.345	1.415	0.916	1.126	0.476	0.965	1.219	0.961		0.920	0.935	0.747	1.103	1.472		1.224	0.509	0.782	5.70E-01
P41212	203	S	Transcription factor ETV6	ETV6	1	9.26E-04	69.261	PLRS(1)PLDNMIR	3	0.055442	3	1.322	1.064		0.864		0.751	0.965	1.219	0.961		0.920	0.935	1.370	0.873				0.803	0.716
P41212	18	T	Transcription factor ETV6	ETV6	0.800318	1.08E-11	78.531	IS(0.187)Y(0.015)T(0.8)PPES(0.997)PVPS(0.001)YASSTPLHVPVPR	3	-0.36975	6	1.309	0.955	1.16		0.711	0.865	0.965	1.219	0.961		0.920	0.935	1.356	0.783	1.207		0.773	0.925	0.761	3.28E-01
P41212	213	S	Transcription factor ETV6	ETV6	1	1.24E-02	130.79	RLS(1)PAER	2	-0.46277	7	1.649	0.743	0.818	0.844	0.981	0.965	0.965	1.219	0.961		0.920	0.935	1.709	0.610	0.851		1.066	1.032	0.993	9.88E-01
P41212	184	S	Transcription factor ETV6	ETV6	0.931346	1.01E-02	49.732	S(0.053)RS(0.931)PIT(0.014)T(0.002)NHR	3	0.19068	1			1.13	1.078		0.792	0.965	1.219	0.961		0.920	0.935			1.176			0.847	0.720
P41227	205	S	N-alpha-acetyltransferase 10	NAA10	0.972242	1.79E-07	107.97	GLAAEDS(0.972)GGDS(0.028)K	2	0.27403	4	1.049		1.007	0.942	1.12	0.883	0.982	0.950	1.002	1.041	0.964	1.060	1.068		1.005	0.905	1.162	0.833	0.932	6.30E-01
P41227	186	S	N-alpha-acetyltransferase 10	NAA10	0.999988	9.28E-06	94.017	GNS(1)PPSSGEACR	2	-0.079523	4	0.783	0.951		0.921	1.346		0.982	0.950	1.002	1.041	0.964	1.060	0.797	1.001		0.885	1.396		1.268	4.73E-01
P41229	299	S	Lysine-specific demethylase 5C	KDM5C	0.828499	7.33E-06	96.464	EELS(0.828)HS(0.172)PEPCTK	2	0.10421	1	1.028					0.972	0.770	0.762	0.847		1.676	0.945	1.335					1.029	0.770
P41229	301	S	Lysine-specific demethylase 5C	KDM5C	0.965084	3.96E-05	86.214	EELS(0.017)HS(0.965)PEPCT(0.018)K	3	-0.16734	2	0.773		0.784	1.154		1.288	0.770	0.762	0.847		1.676	0.945	1.004		0.926			1.363	1.413
P41252	1047	S	Isoleucine--tRNA ligase, cytoplasmic	IARS	0.996664	1.20E-21	149	APLKPYPVS(0.997)PS(0.003)DK	2	0.58224	19	0.752	0.704	0.964	1.378	1.065	1.137	0.959	0.951	0.950	1.061	1.024	1.055	0.784	0.740	1.015	1.299	1.040	1.078	1.346	6.72E-02
P41440	225	S	Folate transporter 1	SLC19A1	0.992704	2.00E-04	86.803	CET(0.001)S(0.006)AS(0.993)ELER	2	-0.068593	5	0.882	1.09	1.187	0.792	1.048							1.000
P41440	5	S	Folate transporter 1	SLC19A1	0.800143	3.17E-02	42.317	MVPS(0.2)S(0.8)PAVEK	2	0.036573	2		1.093	0.913	0.998	1.168	0.828						1.000						0.828
P42166	74	T	Lamina-associated polypeptide 2, isoform alpha	TMPO	0.999661	2.16E-44	153.25	GPPDFSSDEEREPT(1)PVLGSGAAAAGR	3	-0.040621	47	1.139	1.004	1.007	1.086	0.937	0.827	1.105	1.064	1.080	0.872	0.945	0.934	1.031	0.944	0.932	1.245	0.992	0.885	1.074	5.53E-01
P42166	67	S	Lamina-associated polypeptide 2, isoform alpha	TMPO	0.999999	4.96E-79	193.61	GPPDFS(1)S(1)DEEREPTPVLGSGAAAAGR	2	0.57512	82	1.106	0.971	1.059	1	1.052	0.813	1.105	1.064	1.080	0.872	0.945	0.934	1.001	0.913	0.981	1.147	1.113	0.870	1.082	4.36E-01
P42166	66	S	Lamina-associated polypeptide 2, isoform alpha	TMPO	1	2.98E-66	181.64	GPPDFS(1)S(1)DEEREPTPVLGSGAAAAGR	3	-0.22086	97	1.157	1.057	1.169	1.059	0.66	0.898	1.105	1.064	1.080	0.872	0.945	0.934	1.047	0.993	1.082	1.214	0.698	0.961	0.920	6.13E-01
P42166	168	S	Lamina-associated polypeptide 2, isoform alpha	TMPO	0.902599	2.25E-16	134.52	SSTPLPTIS(0.004)S(0.073)S(0.903)AENT(0.021)R	2	0.15529	8	1.032	1.11	0.922	0.842	1.302	0.792	1.105	1.064	1.080	0.872	0.945	0.934	0.934	1.043	0.854	0.966	1.378	0.848	1.127	5.18E-01
P42167	306	S	Lamina-associated polypeptide 2, isoforms beta/gamma	TMPO	1	2.70E-25	154.39	HAS(1)PILPITEFSDIPR	2	0.49558	18	2.119	0.84	1.023	0.618	0.674	0.726	1.082	1.051	1.042	0.940	0.949	0.936	1.958	0.799	0.982	0.657	0.710	0.776	0.573	2.15E-01
P42167	208	T	Lamina-associated polypeptide 2, isoforms beta/gamma	TMPO	0.999764	9.40E-03	118.77	AKT(1)PVTLK	2	-0.14433	3	1.299					0.701	1.082	1.051	1.042	0.940	0.949	0.936	1.201					0.749	0.624
P42224	727	S	Signal transducer and activator of transcription 1-alpha/beta	STAT1	0.976895	2.40E-04	53.481	LQT(0.01)T(0.01)DNLLPMS(0.977)PEEFDEVS(0.002)R	3	0.31338	2		0.661	0.786	1.307	1.029	1.218	0.991	0.938	0.984	0.967	1.062	1.058		0.705	0.799	1.352	0.969	1.151	1.539	7.01E-02
P42566	796	S	Epidermal growth factor receptor substrate 15	EPS15	1	1.16E-17	153.72	SINKLDS(1)PDPFK	2	1.7786	21	0.78	0.582	0.578	1.309	1.244	1.507	1.000	0.985	1.027	0.954	1.060	0.974	0.780	0.591	0.563	1.372	1.174	1.547	2.117	4.87E-03
P42566	324	S	Epidermal growth factor receptor substrate 15	EPS15	0.815185	3.06E-05	85.937	NIIGS(0.185)S(0.815)PVADFSAIK	2	1.3292	2	0.765		0.697	1.069	1.468		1.000	0.985	1.027	0.954	1.060	0.974	0.765		0.679	1.121	1.385		1.735	6.23E-02
P42575	340	S	Caspase-2	CASP2	0.999899	3.68E-05	83.758	NHAGS(1)PGCEESDAGK	2	-0.80477	2		1.184	1.214	0.785	0.787	1.03
P42677	11	S	40S ribosomal protein S27	RPS27	1	3.98E-19	173.44	DLLHPS(1)PEEEKR	3	0.30257	37	0.869	0.899	0.825	1.096	1.262	1.049	0.966	1.047	0.958	1.096	0.968	0.966	0.900	0.859	0.861	1.000	1.304	1.086	1.294	4.83E-02
P42684	631	S	Abelson tyrosine-protein kinase 2	ABL2	0.998744	7.18E-07	103.04	DKS(0.999)PS(0.001)SLLEDAK	2	2.1356	9	0.989	0.659	0.804	1.042	1.263	1.242
P42684	936	S	Abelson tyrosine-protein kinase 2	ABL2	0.974876	1.17E-10	140.01	VPVLIS(0.975)PT(0.025)LK	2	0.072355	7	0.867	0.815	0.686	1.215	1.417
P42694	1163	T	Probable helicase with zinc finger domain	HELZ	0.998927	4.63E-05	75.743	AY(0.001)T(0.999)PPPPLGPHPNLGK	3	0.40201	11	0.842	0.939	0.783	0.997	1.251	1.189
P42694	1614	S	Probable helicase with zinc finger domain	HELZ	0.993159	1.56E-10	67.396	S(0.993)PPAVPS(0.007)PPSSTDHSSHFSNFNDNSR	4	0.39523	1	0.83			0.607	1.564
P42696	28	S	RNA-binding protein 34	RBM34	0.999996	4.14E-23	129.27	SVQEGENPDDGVRGS(1)PPEDYR	3	-1.2061	41	0.936	1.267	1.014	0.792	1.09	0.902	1.072	1.074	0.970	0.982	0.924	0.979	0.873	1.180	1.045	0.807	1.180	0.921	0.938	6.77E-01
P42696	14	S	RNA-binding protein 34	RBM34	1	1.21E-39	188.47	S(1)VQEGENPDDGVR	2	-0.33616	12	0.741	0.8	0.963	1.04	1.245	1.211	1.072	1.074	0.970	0.982	0.924	0.979	0.691	0.745	0.993	1.059	1.347	1.237	1.500	3.19E-02
P42858	1199	S	Huntingtin	HTT	0.982298	2.20E-03	49.187	EKEPGEQAS(0.018)VPLS(0.982)PK	3	-2.2696	2	1.098	0.616	0.944	0.961	1.267	1.114	0.898	0.975	1.191	0.936			1.223	0.632	0.793	1.027			1.164
P43243	208	S	Matrin-3	MATR3	1	2.26E-04	93.623	S(1)QESGYYDR	2	0.28582	3	0.841	0.848	0.693	1.087	1.176	1.355	1.089	1.091	1.081	0.910	0.909	0.920	0.772	0.777	0.641	1.195	1.294	1.473	1.808	3.14E-03
P43243	188	S	Matrin-3	MATR3	1	1.62E-52	175.43	RDS(1)FDDR	2	0.26245	48	1.022	0.551	0.845	1.265	1.259	1.058	1.089	1.091	1.081	0.910	0.909	0.920	0.938	0.505	0.782	1.390	1.385	1.150	1.764	1.92E-02
P43243	604	S	Matrin-3	MATR3	0.997546	1.29E-32	169.57	SYS(1)PDGKES(0.998)PS(0.002)DK	2	0.19317	106	0.919	1.136	1.035	0.836	1.254	0.82	1.089	1.091	1.081	0.910	0.909	0.920	0.844	1.041	0.957	0.919	1.380	0.891	1.122	5.30E-01
P43243	596	S	Matrin-3	MATR3	0.999601	3.62E-28	162.72	S(1)YS(1)PDGKES(0.951)PS(0.049)DKK	2	0.64137	23	0.944	0.868	1.198	0.741	1.365	0.884	1.089	1.091	1.081	0.910	0.909	0.920	0.867	0.796	1.108	0.814	1.502	0.961	1.183	5.03E-01
P43243	598	S	Matrin-3	MATR3	1	1.29E-32	162.72	SYS(1)PDGK	2	0.26967	95	0.952	1.096	0.953	0.869	1.195	0.934	1.089	1.091	1.081	0.910	0.909	0.920	0.874	1.005	0.882	0.955	1.315	1.015	1.190	2.16E-01
P43243	164	S	Matrin-3	MATR3	0.927628	1.11E-02	61.194	S(0.928)AT(0.072)REPPYR	2	-0.38486	2	0.344	0.829		1.164	1.485	1.177	1.089	1.091	1.081	0.910	0.909	0.920	0.316	0.760		1.279	1.634	1.279	2.598	3.16E-02
P43243	195	S	Matrin-3	MATR3	0.993954	1.18E-04	70.783	GPS(0.994)LNPVLDYDHGS(0.006)R	3	-0.83956	1	0.942					1.058	1.089	1.091	1.081	0.910	0.909	0.920	0.865					1.150	1.329
P43250	484	S	G protein-coupled receptor kinase 6	GRK6	0.850011	1.31E-16	141	DVLDIEQFS(0.85)T(0.15)VK	2	-0.42508	5	1.354	1.095	0.829		0.982	0.739	0.908	0.976	0.860	1.132	1.158	0.966	1.491	1.122	0.964		0.848	0.765	0.676	1.55E-01
P43353	447	S	Aldehyde dehydrogenase family 3 member B1	ALDH3B1	0.976794	3.68E-02	51.066	Y(0.023)PPQS(0.977)PR	2	0.61623	5		0.919		1.189	1.236	0.656	1.022	1.011	0.967					0.909
P45880	115	S	Voltage-dependent anion-selective channel protein 2	VDAC2	0.999959	1.03E-48	207.85	LTFDTTFS(1)PNTGK	2	0.53025	24	1.163	0.999	0.812	0.918	1.305	0.805	1.040	1.017	0.980	1.004	0.956	1.003	1.118	0.982	0.829	0.914	1.365	0.803	1.052	8.03E-01
P46013	2528	S	Proliferation marker protein Ki-67	MKI67	1	9.80E-09	154.85	AFKES(1)PK	2	1.0758	3		1.617	1.087		0.679	0.617	1.159	1.126	1.114	0.856	0.877	0.868		1.436	0.976		0.774	0.711	0.616	1.84E-01
P46013	2223	S	Proliferation marker protein Ki-67	MKI67	0.999996	4.84E-13	111.11	S(1)PQPDPVGTPTIFKPQSK	3	-0.1553	13	1.527	0.643	1.138	1.216	0.503	0.974	1.159	1.126	1.114	0.856	0.877	0.868	1.318	0.571	1.022	1.421	0.574	1.122	1.071	8.45E-01
P46013	2828	S	Proliferation marker protein Ki-67	MKI67	0.756498	2.46E-05	90.561	IPCKS(0.241)S(0.756)PELEDT(0.002)ATSSK	2	3.4261	3	0.926	0.829	1.062	0.641	1.542		1.159	1.126	1.114	0.856	0.877	0.868	0.799	0.736	0.953	0.749	1.758		1.511	3.51E-01
P46013	1636	S	Proliferation marker protein Ki-67	MKI67	0.958844	2.14E-02	64.654	LKT(0.041)S(0.959)LGK	2	-0.17327	3	0.974			0.821	1.205		1.159	1.126	1.114	0.856	0.877	0.868	0.840			0.959	1.374		1.388
P46013	1861	S	Proliferation marker protein Ki-67	MKI67	0.999519	3.02E-33	177.44	ILCKS(1)PQSDPADTPTNTK	2	0.27442	16		1.604	1.034	1.004	0.757	0.601	1.159	1.126	1.114	0.856	0.877	0.868		1.425	0.928	1.173	0.863	0.692	0.773	3.79E-01
P46013	827	S	Proliferation marker protein Ki-67	MKI67	1	4.37E-05	126.71	CSAS(1)PPLRR	2	-2.7679	12	0.905	1.129	1.114	0.846	1.102	0.904	1.159	1.126	1.114	0.856	0.877	0.868	0.781	1.003	1.000	0.988	1.257	1.041	1.181	2.03E-01
P46013	1376	S	Proliferation marker protein Ki-67	MKI67	0.936792	8.58E-20	139.44	MPCES(0.063)S(0.937)PPESADTPTSTR	2	0.60973	28	1.172	1.116	1.015	0.718		0.98	1.159	1.126	1.114	0.856	0.877	0.868	1.011	0.991	0.911	0.839		1.129	1.013	9.19E-01
P46013	579	S	Proliferation marker protein Ki-67	MKI67	0.999977	4.43E-33	174.59	AQSLVIS(1)PPAPSPR	2	0.55274	19	1.337	0.967	1.157	0.861	0.856	0.822	1.159	1.126	1.114	0.856	0.877	0.868	1.154	0.859	1.039	1.006	0.976	0.947	0.960	6.66E-01
P46013	2827	S	Proliferation marker protein Ki-67	MKI67	0.792627	2.46E-05	90.561	IPCKS(0.793)S(0.207)PELEDTATSSK	3	-0.87574	3	0.926	0.829	1.062	0.641	1.542		1.159	1.126	1.114	0.856	0.877	0.868	0.799	0.736	0.953	0.749	1.758		1.511	3.51E-01
P46013	2085	T	Proliferation marker protein Ki-67	MKI67	0.999997	2.15E-08	104.21	ELFQT(1)PDHTEESTTDDK	2	1.4363	12	1.217	1.047	0.823	1.085		0.828	1.159	1.126	1.114	0.856	0.877	0.868	1.050	0.930	0.739	1.268		0.954	1.226	3.04E-01
P46013	1375	S	Proliferation marker protein Ki-67	MKI67	0.921179	7.22E-35	159.06	MPCES(0.921)S(0.079)PPESADTPTSTR	2	-0.39626	28	0.824	1.083	1.046	0.938	1.109		1.159	1.126	1.114	0.856	0.877	0.868	0.711	0.962	0.939	1.096	1.265		1.356	8.33E-02
P46013	1071	S	Proliferation marker protein Ki-67	MKI67	1	2.59E-04	152.04	TFKES(1)PK	2	-0.14497	6	1.011	1.453	0.743	0.84	0.88	1.073	1.159	1.126	1.114	0.856	0.877	0.868	0.872	1.290	0.667	0.981	1.003	1.236	1.138	5.51E-01
P46013	2708	S	Proliferation marker protein Ki-67	MKI67	1	5.26E-13	114.63	IPCES(1)PPLEVVDTTASTK	2	-1.2067	2		1.205	0.924	1.041	0.98	0.85	1.159	1.126	1.114	0.856	0.877	0.868		1.070	0.829	1.216	1.117	0.979	1.163	3.08E-01
P46013	1253	S	Proliferation marker protein Ki-67	MKI67	0.99872	6.90E-14	96.591	IPCDS(0.999)PQS(0.001)DPVDTPTSTK	2	-0.8662	12	1.133	0.951	1.019	0.866		1.03	1.159	1.126	1.114	0.856	0.877	0.868	0.978	0.845	0.915	1.012		1.187	1.205	1.07E-01
P46013	2588	S	Proliferation marker protein Ki-67	MKI67	0.999975	1.78E-06	76.826	IPCKS(1)PPPELTDTATSTK	3	-1.1311	5	0.787	0.96	0.748	0.989	1.508	1.007	1.159	1.126	1.114	0.856	0.877	0.868	0.679	0.853	0.671	1.155	1.719	1.160	1.832	3.59E-02
P46013	2344	S	Proliferation marker protein Ki-67	MKI67	1	5.15E-13	89.468	S(1)PQPDPVDTPASTK	2	1.0892	13	0.89	0.967	1.229	0.614	1.194	1.107	1.159	1.126	1.114	0.856	0.877	0.868	0.768	0.859	1.103	0.717	1.361	1.275	1.229	4.08E-01
P46013	308	S	Proliferation marker protein Ki-67	MKI67	1	1.49E-24	132.36	SGGSGHAVAEPAS(1)PEQELDQNK	3	0.51669	18	1.3	1.03	0.94	0.817	1.146	0.767	1.159	1.126	1.114	0.856	0.877	0.868	1.122	0.915	0.844	0.954	1.307	0.884	1.092	6.00E-01
P46013	357	S	Proliferation marker protein Ki-67	MKI67	1	6.85E-50	211.74	TPVQYSQQQNS(1)PQK	2	0.12935	17	1.303	0.862	1.236	0.865	0.606	1.129	1.159	1.126	1.114	0.856	0.877	0.868	1.124	0.766	1.110	1.011	0.691	1.301	1.001	9.97E-01
P46013	1131	S	Proliferation marker protein Ki-67	MKI67	1	6.99E-35	155.16	IACKS(1)PPPESVDTPTSTK	3	-0.17924	70	1.062	1.069	0.806	0.927	1.052	1.084	1.159	1.126	1.114	0.856	0.877	0.868	0.916	0.949	0.724	1.083	1.200	1.249	1.364	2.17E-02
P46013	584	S	Proliferation marker protein Ki-67	MKI67	0.999844	7.99E-28	159.95	AQSLVISPPAPS(1)PR	2	0.30045	16	1.613	0.989	1.122	0.738	0.619	0.918	1.159	1.126	1.114	0.856	0.877	0.868	1.392	0.878	1.007	0.862	0.706	1.058	0.801	3.05E-01
P46013	2466	S	Proliferation marker protein Ki-67	MKI67	0.99962	7.39E-11	118.72	ITEVSCKS(1)PQPESFK	3	0.057576	6	1.252	0.771	1.091	1.169	0.815	0.903	1.159	1.126	1.114	0.856	0.877	0.868	1.080	0.685	0.979	1.366	0.929	1.040	1.215	3.27E-01
P46019	1044	S	Phosphorylase b kinase regulatory subunit alpha, liver isoform	PHKA2	0.816819	4.59E-08	63.203	S(0.303)S(0.336)T(0.374)PS(0.086)S(0.817)PT(0.068)GT(0.006)S(0.006)S(0.002)S(0.002)DS(0.001)GGHHIGWGER	3	0.8538	5	1.107		0.866	0.872	1.283	0.872		0.955			1.045						1.228
P46060	442	S	Ran GTPase-activating protein 1	RANGAP1	0.999866	4.08E-16	73.027	ILDPNTGEPAPVLS(0.471)S(0.525)PPPADVS(0.003)T(0.001)FLAFPS(1)PEK	4	0.24017	17	0.981	1.055	0.644	1.26	1.036	1.024	1.051	1.034	1.048	0.941	0.934	0.992	0.933	1.020	0.615	1.339	1.109	1.032	1.355	1.19E-01
P46087	67	S	Probable 28S rRNA (cytosine(4447)-C(5))-methyltransferase	NOP2	1	3.15E-28	167.18	S(1)PEAKPLPGK	2	0.24662	29	1.353	1.195	1.181	0.712	0.862	0.697	0.974	1.037	1.062	0.917	0.987	1.021	1.389	1.152	1.112	0.776	0.873	0.683	0.638	1.27E-02
P46087	786	S	Probable 28S rRNA (cytosine(4447)-C(5))-methyltransferase	NOP2	0.999964	1.79E-14	157.56	GPQPPTVS(1)PIR	3	-0.43056	50	1.331	1.016	0.873	0.871	0.906	1.003	0.974	1.037	1.062	0.917	0.987	1.021	1.367	0.980	0.822	0.950	0.918	0.982	0.900	5.50E-01
P46087	181	S	Probable 28S rRNA (cytosine(4447)-C(5))-methyltransferase	NOP2	0.896756	1.33E-21	83.202	EAAAGIQWS(0.897)EEET(0.103)EDEEEEKEVTPESGPPK	3	1.9379	6		0.757		1.059		1.185	0.974	1.037	1.062	0.917	0.987	1.021		0.730		1.155		1.161	1.586
P46087	58	S	Probable 28S rRNA (cytosine(4447)-C(5))-methyltransferase	NOP2	1	6.68E-02	50.592	RLGS(1)VEAPK	2	0.2355	1	0.592	0.716	0.6	1.36	1.382	1.35	0.974	1.037	1.062	0.917	0.987	1.021	0.608	0.690	0.565	1.483	1.400	1.322	2.257	1.92E-04
P46087	732	S	Probable 28S rRNA (cytosine(4447)-C(5))-methyltransferase	NOP2	0.944675	6.63E-33	170.16	GTDTQTPAVLS(0.945)PS(0.055)K	3	-0.21286	32	1.063	1.266	1.117	0.9	0.973	0.682	0.974	1.037	1.062	0.917	0.987	1.021	1.091	1.221	1.052	0.981	0.986	0.668	0.783	1.06E-01
P46100	84	S	Transcriptional regulator ATRX	ATRX	0.995578	4.55E-03	83.182	RKPS(0.996)IVT(0.004)K	2	-0.30725	3	1.145	1.77	1.155	0.662	0.592	0.676	0.981	1.052	1.064	0.904	0.989	1.009	1.167	1.683	1.086	0.732	0.599	0.670	0.508	2.78E-02
P46100	849	S	Transcriptional regulator ATRX	ATRX	0.999997	9.49E-07	100.22	DFDS(1)S(1)EDEKHSK	2	0.14685	5	0.99	1.141	0.061	1.294	1.77	0.744	0.981	1.052	1.064	0.904	0.989	1.009	1.009	1.085	0.057	1.431	1.790	0.737	1.840	2.54E-01
P46100	675	S	Transcriptional regulator ATRX	ATRX	0.948188	2.13E-13	102.98	RPTETNPVT(0.103)S(0.948)NS(0.948)DEECNETVK	3	0.27102	12	1.035	1.241	0.816	0.828	1.249	0.831	0.981	1.052	1.064	0.904	0.989	1.009	1.055	1.180	0.767	0.916	1.263	0.824	1.000	9.99E-01
P46100	1161	S	Transcriptional regulator ATRX	ATRX	0.842967	7.50E-11	90.1	EIQSGSSSSDAEES(0.843)S(0.157)EDNKK	2	-0.24746	5	1.082	1.419		0.499			0.981	1.052	1.064	0.904	0.989	1.009	1.103	1.349		0.552			0.450
P46100	594	S	Transcriptional regulator ATRX	ATRX	0.990735	2.41E-03	57.476	LT(0.005)PVS(0.991)LS(0.08)NS(0.925)PIK	2	-0.97022	3	1.155	0.889	1.016	1.049	1.12	0.77	0.981	1.052	1.064	0.904	0.989	1.009	1.177	0.845	0.955	1.160	1.132	0.763	1.026	8.79E-01
P46100	1527	S	Transcriptional regulator ATRX	ATRX	0.92593	1.94E-31	184	EVIEIEDAS(0.926)PT(0.074)K	2	0.65145	8	0.968	0.824	0.888	0.946	1.062	1.312	0.981	1.052	1.064	0.904	0.989	1.009	0.987	0.783	0.835	1.046	1.074	1.300	1.313	5.45E-02
P46100	850	S	Transcriptional regulator ATRX	ATRX	0.999832	9.49E-07	100.22	DFDS(1)S(1)EDEKHSK	2	0.14685	5	0.99	1.141	0.061	1.294	1.77	0.744	0.981	1.052	1.064	0.904	0.989	1.009	1.009	1.085	0.057	1.431	1.790	0.737	1.840	2.54E-01
P46100	677	S	Transcriptional regulator ATRX	ATRX	0.999978	6.28E-40	154.7	RPTETNPVTSNS(1)DEECNETVK	3	-0.46904	47	1.293	1.084	0.861	1.044	0.691	1.027	0.981	1.052	1.064	0.904	0.989	1.009	1.318	1.030	0.809	1.155	0.699	1.018	0.909	6.58E-01
P46100	784	S	Transcriptional regulator ATRX	ATRX	0.806288	1.60E-19	160.03	KS(0.014)S(0.806)T(0.179)S(0.001)GSDFDTK	2	-1.4746	3		1.491	1.019	0.92	0.823	0.747	0.981	1.052	1.064	0.904	0.989	1.009		1.417	0.958	1.018	0.832	0.740	0.727	2.05E-01
P46100	598	S	Transcriptional regulator ATRX	ATRX	0.999806	5.67E-20	132.23	LTPVSLSNS(1)PIK	2	0.38369	13	1.532	1.039	0.945	0.757	0.911	0.816	0.981	1.052	1.064	0.904	0.989	1.009	1.562	0.988	0.888	0.837	0.921	0.809	0.747	2.44E-01
P46100	1352	S	Transcriptional regulator ATRX	ATRX	1	2.56E-09	112.82	LT(0.001)VS(0.999)DGES(1)GEEKK	2	2.4479	9	0.929	0.762	1.27	1.224	0.772	1.044	0.981	1.052	1.064	0.904	0.989	1.009	0.947	0.724	1.194	1.354	0.781	1.035	1.106	6.61E-01
P46100	1348	S	Transcriptional regulator ATRX	ATRX	0.99942	1.99E-08	112.82	LT(0.001)VS(0.999)DGES(1)GEEKK	2	2.4479	7	1.101	0.669	1.223	1.157	0.791	1.058	0.981	1.052	1.064	0.904	0.989	1.009	1.122	0.636	1.149	1.280	0.800	1.049	1.076	7.52E-01
P46100	1061	S	Transcriptional regulator ATRX	ATRX	1	2.01E-25	194.39	KKDELS(1)DYAEK	2	0.93344	24	1.54	1.077	0.896	0.507	0.809	1.17	0.981	1.052	1.064	0.904	0.989	1.009	1.570	1.024	0.842	0.561	0.818	1.160	0.739	3.44E-01
P46100	1996	S	Transcriptional regulator ATRX	ATRX	0.964359	3.72E-04	57.045	AT(0.416)S(0.492)S(0.046)S(0.053)NPS(0.028)S(0.964)PAPDWYK	2	-0.040022	3	0.828	1.026			1.146		0.981	1.052	1.064	0.904	0.989	1.009	0.844	0.975			1.159		1.274
P46379	973	S	Large proline-rich protein BAG6	BAG6	1	5.92E-13	118.84	ENAS(1)PAPGTTAEEAMSR	2	-1.4404	16	0.673	0.904	1.017	0.791	1.616		0.982	0.988	0.963	1.005	1.018	1.044	0.685	0.915	1.056	0.787	1.587		1.341	4.27E-01
P46379	1117	S	Large proline-rich protein BAG6	BAG6	1	2.05E-11	141.07	LQEDPNYS(1)PQR	2	0.054678	10	1.028	1.062	0.682	1.057	1.142	1.029	0.982	0.988	0.963	1.005	1.018	1.044	1.047	1.075	0.708	1.052	1.122	0.986	1.116	4.27E-01
P46379	113	S	Large proline-rich protein BAG6	BAG6	0.908739	1.19E-45	131.83	APPQTHLPSGAS(0.002)S(0.006)GT(0.005)GS(0.012)AS(0.019)AT(0.041)HGGGS(0.909)PPGT(0.006)R	3	0.11596	28	1.003		1.125	0.971	0.901		0.982	0.988	0.963	1.005	1.018	1.044	1.021		1.168	0.966	0.885		0.845	1.81E-01
P46783	146	S	40S ribosomal protein S10	RPS10	0.967806	5.93E-08	110.12	AEAGAGS(0.968)AT(0.032)EFQFR	2	-4.0629	5	1.073	1.047	0.677	0.81	1.084	1.309	0.927	1.092	0.978	0.969	0.966	1.069	1.157	0.959	0.692	0.836	1.122	1.225	1.133	5.22E-01
P46937	109	S	Transcriptional coactivator YAP1	YAP1	0.998489	2.54E-58	189.15	QAS(0.998)T(0.002)DAGTAGALTPQHVR	2	-0.23364	8	0.857			1.183	0.997	0.963	1.156	0.992	1.130	0.849	0.961	0.911	0.741			1.393	1.037	1.057	1.568
P46937	61	S	Transcriptional coactivator YAP1	YAP1	0.97402	6.98E-15	122.49	GDS(0.974)ET(0.026)DLEALFNAVMNPK	2	-0.76907	16	1.428	0.755	1.002	1.055		0.76	1.156	0.992	1.130	0.849	0.961	0.911	1.235	0.761	0.887	1.243		0.834	1.081	7.66E-01
P46937	138	S	Transcriptional coactivator YAP1	YAP1	0.848731	3.07E-45	114.26	AHSSPASLQLGAVS(0.849)PGT(0.276)LT(0.686)PT(0.177)GVVS(0.011)GPAAT(0.001)PTAQHLR	4	-0.090344	5	0.344	0.446	0.224	2.342	0.762	1.882	1.156	0.992	1.130	0.849	0.961	0.911	0.298	0.450	0.198	2.759	0.793	2.066	5.942	5.50E-02
P46939	1405	S	Utrophin	UTRN	0.952136	2.02E-04	86.699	SQPLT(0.043)S(0.952)PES(0.005)R	2	-3.0196	4	1.16	0.928	0.778		1.069	1.066	1.057	1.055	1.020	0.955	0.970	0.943	1.097	0.880	0.763		1.102	1.130	1.222	2.08E-01
P46940	2	S	Ras GTPase-activating-like protein IQGAP1	IQGAP1	1	6.84E-07	97.2	S(1)AADEVDGLGVAR	2	0.024182	1	0.813	0.748	0.515	1.125	1.441	1.358	0.780	0.790	0.799	1.171	1.236	1.224	1.042	0.947	0.645	0.961	1.166	1.109	1.229	2.10E-01
P47755	9	S	F-actin-capping protein subunit alpha-2	CAPZA2	1	2.73E-03	55.531	ADLEEQLS(1)DEEK	2	-2.2756	1	1.168	0.737	0.596	1.379		1.12	0.914	0.815	0.769	1.233	1.054	1.216	1.278	0.904	0.775	1.118		0.921	1.034	8.81E-01
P47914	142	S	60S ribosomal protein L29	RPL29	1	2.39E-04	68.088	AQAAAPAS(1)VPAQAPK	2	0.33597	5	1.169	0.739	0.964	1.071	1.031	1.026	1.063	0.826	0.810	1.198	0.927	1.176	1.100	0.895	1.190	0.894	1.112	0.872	0.904	4.30E-01
P47974	438	S	mRNA decay activator protein ZFP36L2	ZFP36L2	0.994252	3.11E-09	75.103	RLS(0.994)DS(0.006)PVFDAPPSPPDSLSDR	3	-0.8382	5	1.212	0.886	1.03	1.049		0.822
P48634	782	T	Protein PRRC2A	PRRC2A	1	6.05E-04	93.649	ERGT(1)PPVDPK	2	0.64221	12	0.891	1.391	1.285	0.533	1.117	0.783	0.954	0.828	0.963	1.061	1.016	1.178	0.934	1.680	1.334	0.502	1.099	0.665	0.574	1.16E-01
P48634	1092	S	Protein PRRC2A	PRRC2A	0.969755	2.56E-10	135.21	S(0.03)EGS(0.97)EYEEIPK	2	-0.054874	4			0.648		1.086	1.266	0.954	0.828	0.963	1.061	1.016	1.178			0.673		1.069	1.075	1.593
P48634	1219	S	Protein PRRC2A	PRRC2A	1	4.23E-06	99.941	LIPGPLS(1)PVAR	2	0.42585	12	1.202	0.871	0.761	1.047	1.203	0.915	0.954	0.828	0.963	1.061	1.016	1.178	1.260	1.052	0.790	0.987	1.184	0.777	0.950	7.89E-01
P48634	1089	S	Protein PRRC2A	PRRC2A	0.996659	1.95E-11	141.73	S(0.997)EGS(0.003)EYEEIPK	2	-0.11185	3	1.094	0.924		0.982			0.954	0.828	0.963	1.061	1.016	1.178	1.147	1.116		0.926			0.818
P48634	808	S	Protein PRRC2A	PRRC2A	0.987976	1.88E-03	136.99	PLT(0.012)S(0.988)PLR	2	-0.28761	10	0.976	0.823	0.815	1.098	1.289		0.954	0.828	0.963	1.061	1.016	1.178	1.023	0.994	0.846	1.035	1.269		1.207	1.77E-01
P48634	363	S	Protein PRRC2A	PRRC2A	0.999516	1.86E-25	146.13	DSQS(1)ASGEERPPEADGK	2	0.30751	3	1.219	1.318	0.743	0.782	0.898	1.041	0.954	0.828	0.963	1.061	1.016	1.178	1.278	1.592	0.772	0.737	0.884	0.884	0.688	1.95E-01
P48634	1110	S	Protein PRRC2A	PRRC2A	0.851049	1.14E-18	132.6	GS(0.042)ET(0.049)GS(0.851)ET(0.057)HES(0.001)DLAPSDK	3	-0.44086	5	0.797	0.747	1.322			1.134	0.954	0.828	0.963	1.061	1.016	1.178	0.835	0.902	1.373			0.963	0.928
P48634	380	S	Protein PRRC2A	PRRC2A	0.999946	2.46E-14	129.25	KGNS(1)PNSEPPTPK	2	-0.31666	5	0.998	0.932	1.539	0.815	1.251	0.465	0.954	0.828	0.963	1.061	1.016	1.178	1.046	1.126	1.598	0.768	1.231	0.395	0.635	1.98E-01
P48634	761	S	Protein PRRC2A	PRRC2A	0.999453	4.10E-40	194.77	S(0.001)DS(0.999)GGSSSEPFDR	2	0.25073	10	0.64	0.748	0.668	1.005	1.638	1.301	0.954	0.828	0.963	1.061	1.016	1.178	0.671	0.903	0.694	0.947	1.612	1.104	1.616	9.52E-02
P48960	831	S	CD97 antigen	CD97	0.962945	1.29E-02	67.385	ALRAS(0.963)ES(0.037)GI	2	1.2608	4	0.811			0.94		1.25	0.896	0.953	1.015	1.074	1.061	1.001	0.905			0.875		1.249	1.173
P49006	22	S	MARCKS-related protein	MARCKSL1	1	6.08E-23	148.06	GDVTAEEAAGAS(1)PAK	2	-2.5719	8	1.189	1.156	1.094	1.021	0.802	0.737	0.804	1.149	0.999			1.048	1.479	1.006	1.095			0.703	0.589
P49023	85	S	Paxillin	PXN	0.94652	1.67E-09	100.59	FIHQQPQS(0.001)S(0.052)S(0.947)PVYGSSAK	3	-1.2328	16	0.619	0.63	1.09	1.811	1.059	0.791	0.880	1.166	1.019	1.009	0.963	0.963	0.703	0.540	1.070	1.795	1.100	0.821	1.606	2.28E-01
P49023	106	S	Paxillin	PXN	0.965098	1.27E-45	177.02	TSSVSNPQDS(0.004)VGS(0.965)PCS(0.031)R	2	-0.2266	10	0.926		0.467	1.272	1.26	1.074	0.880	1.166	1.019	1.009	0.963	0.963	1.052		0.458	1.261	1.308	1.115	1.626	1.36E-01
P49321	421	S	Nuclear autoantigenic sperm protein	NASP	0.999946	1.97E-04	94.363	LVPS(1)QEETK	2	-0.97885	5	0.976		0.765	1.147	1.111		0.979	1.000	1.021	1.005	0.983	1.012	0.997		0.749	1.141	1.130		1.301	1.68E-01
P49321	451	S	Nuclear autoantigenic sperm protein	NASP	0.999952	2.27E-32	171.44	VAQGATEKS(1)PEDK	2	-0.01157	6	1.193	0.475	1.674	1.028	0.913	0.717	0.979	1.000	1.021	1.005	0.983	1.012	1.219	0.475	1.640	1.023	0.929	0.708	0.798	5.60E-01
P49327	2204	T	Fatty acid synthase	FASN	0.999999	2.38E-27	167.29	ADEASELACPT(1)PK	2	-0.56673	2	1.118	0.916	1.111	1.002	1.061	0.792	0.947	0.966	0.992	1.007	1.042	1.046	1.181	0.948	1.120	0.995	1.018	0.757	0.853	2.16E-01
P49450	19	S	Histone H3-like centromeric protein A	CENPA	0.994401	3.23E-21	142.72	RRS(0.999)PS(0.994)PT(0.006)PTPGPSR	3	0.13449	18	0.647	1.119	1.312	0.863	1.437	0.622
P49450	17	S	Histone H3-like centromeric protein A	CENPA	0.999995	3.23E-21	142.72	RRS(1)PS(0.978)PT(0.021)PT(0.001)PGPSR	2	-0.77454	16	0.667	1.154	1.293	0.826	1.419	0.641
P49454	3175	S	Centromere protein F	CENPF	0.966516	6.11E-35	162.42	SVPVNNLPERS(0.967)PT(0.033)DSPR	3	-0.31969	15	1.017	1.275	0.88	0.817	1.213	0.797	0.817	0.792	0.836	1.180	1.160	1.215	1.245	1.610	1.053	0.692	1.046	0.656	0.613	6.99E-02
P49454	3150	S	Centromere protein F	CENPF	0.999989	9.86E-08	118.37	VAQRS(1)PVDSGTILR	3	-0.34957	21	0.763	0.735	0.556	1.159	1.581	1.207	0.817	0.792	0.836	1.180	1.160	1.215	0.934	0.928	0.665	0.982	1.363	0.993	1.321	1.52E-01
P49454	3007	S	Centromere protein F	CENPF	0.987837	1.67E-06	62.049	GS(1)PLLGPVVPGPS(0.988)PIPS(0.009)VT(0.004)EK	3	-0.28976	6	0.978	0.866	0.921	0.808	1.094	1.333	0.817	0.792	0.836	1.180	1.160	1.215	1.197	1.093	1.102	0.685	0.943	1.097	0.803	1.49E-01
P49454	3094	S	Centromere protein F	CENPF	0.837057	9.11E-03	69.825	T(0.163)S(0.837)PYILR	2	-0.045109	8	0.912	0.859		1.031	1.14	1.057	0.817	0.792	0.836	1.180	1.160	1.215	1.116	1.085		0.874	0.983	0.870	0.826	3.00E-02
P49454	3119	S	Centromere protein F	CENPF	0.999938	4.02E-10	138.89	LALS(1)PLSLGK	2	0.14694	12	1.759	0.727	1.012	0.826	0.87	0.805	0.817	0.792	0.836	1.180	1.160	1.215	2.153	0.918	1.211	0.700	0.750	0.663	0.493	1.25E-01
P49454	2996	S	Centromere protein F	CENPF	0.999998	4.59E-09	72.302	GS(1)PLLGPVVPGPSPIPSVTEK	2	0.044502	18	0.924	0.766	0.732	1.158	1.28	1.14	0.817	0.792	0.836	1.180	1.160	1.215	1.131	0.967	0.876	0.981	1.103	0.938	1.017	8.63E-01
P49454	1750	S	Centromere protein F	CENPF	1	5.73E-34	182.35	S(1)LLGIDTEDAIQGR	2	0.3581	6	1.167	0.902	0.64	1.025	1.23	1.036	0.817	0.792	0.836	1.180	1.160	1.215	1.428	1.139	0.766	0.869	1.060	0.853	0.835	4.17E-01
P49454	1747	S	Centromere protein F	CENPF	0.926269	1.81E-25	187.97	LQLQGLDLS(0.926)S(0.074)R	2	0.33142	12	1.805	0.538	0.485	1.208	1.02	0.944	0.817	0.792	0.836	1.180	1.160	1.215	2.209	0.679	0.580	1.024	0.879	0.777	0.773	6.47E-01
P49454	1822	S	Centromere protein F	CENPF	0.81524	1.59E-10	60.382	ITET(0.002)GAVKPT(0.018)GECS(0.053)GEQS(0.815)PDT(0.1)NY(0.012)EPPGEDK	3	-0.42205	6		0.59	0.171		1.434	1.805	0.817	0.792	0.836	1.180	1.160	1.215		0.745	0.205		1.236	1.486	2.867	9.67E-02
P49454	1770	S	Centromere protein F	CENPF	0.998642	9.94E-09	96.379	NESCDIS(0.999)KEHT(0.001)SETTER	3	3.6402	3	0.737			0.851	1.508	0.905	0.817	0.792	0.836	1.180	1.160	1.215	0.902			0.721	1.300	0.745	1.022
P49585	347	S	Choline-phosphate cytidylyltransferase A	PCYT1A	0.99406	4.61E-04	70.038	T(0.436)S(0.57)PPCS(0.994)PANLS(0.001)R	2	-0.40726	8	1.089			1		0.911	0.903	1.057	0.909	1.077	0.942	1.113	1.206			0.929		0.819	0.724
P49585	329	S	Choline-phosphate cytidylyltransferase A	PCYT1A	1	4.07E-07	149.83	ERS(1)PS(1)PSFR	2	-1.2153	17	0.961	1.002	0.908	1.153	0.906	1.07	0.903	1.057	0.909	1.077	0.942	1.113	1.064	0.948	0.999	1.071	0.962	0.961	0.994	9.13E-01
P49585	331	S	Choline-phosphate cytidylyltransferase A	PCYT1A	0.999934	4.07E-07	149.83	ERS(1)PS(1)PSFR	2	-1.2153	12	1.062	1.076	0.895	1.148	0.804	1.015	0.903	1.057	0.909	1.077	0.942	1.113	1.176	1.018	0.985	1.066	0.854	0.912	0.891	2.52E-01
P49589	19	S	Cysteine--tRNA ligase, cytoplasmic	CARS	0.999821	1.27E-05	92.236	VQPQWS(1)PPAGTQPCR	3	-0.28223	8	0.814	1.132	0.947		1.256	0.852	0.914	1.012	1.040	1.015	1.041	0.978	0.891	1.119	0.911		1.207	0.871	1.067	7.03E-01
P49590	67	S	Probable histidine--tRNA ligase, mitochondrial	HARS2	1	1.14E-04	87.184	DLS(1)PQHMVVR	3	-0.88864	16	1.005	0.892	0.913	1.127	1.023	1.039	0.886	1.032	1.002	1.075	0.985	1.019	1.134	0.864	0.911	1.048	1.039	1.020	1.068	4.77E-01
P49674	363	S	Casein kinase I isoform epsilon	CSNK1E	0.849721	7.97E-04	75.911	IQPAGNT(0.15)S(0.85)PR	2	0.63902	3	1.041	0.847			1.111		1.008	0.875	1.104	1.048	0.925	1.039	1.033	0.968			1.201		1.201
P49736	27	S	DNA replication licensing factor MCM2	MCM2	0.992554	1.88E-14	157.01	GNDPLT(0.062)S(0.945)S(0.993)PGR	2	-0.14844	24	1.051	0.934	1.091	0.883	1.3	0.741	1.039	1.105	1.070	0.900	0.958	0.928	1.012	0.845	1.020	0.981	1.357	0.798	1.090	6.44E-01
P49736	40	S	DNA replication licensing factor MCM2	MCM2	0.994256	1.39E-09	124.81	RTDALT(0.006)S(0.994)S(1)PGR	2	0.15745	17	1.255	1.334	0.302	1.204	1.531	0.374	1.039	1.105	1.070	0.900	0.958	0.928	1.208	1.207	0.282	1.338	1.598	0.403	1.238	6.77E-01
P49736	139	S	DNA replication licensing factor MCM2	MCM2	1	3.71E-70	221.31	RGLLYDS(1)DEEDEERPAR	3	-0.83993	70	1.138	0.937	0.964	0.982	1.041	0.939	1.039	1.105	1.070	0.900	0.958	0.928	1.095	0.848	0.901	1.091	1.087	1.012	1.121	2.21E-01
P49736	26	S	DNA replication licensing factor MCM2	MCM2	0.945396	4.41E-06	97.823	GNDPLT(0.062)S(0.945)S(0.993)PGR	2	-0.14844	1	1.342	0.915	1.089	0.875	1.001	0.777	1.039	1.105	1.070	0.900	0.958	0.928	1.292	0.828	1.018	0.972	1.045	0.837	0.910	5.58E-01
P49736	108	S	DNA replication licensing factor MCM2	MCM2	0.988817	1.07E-18	91.748	AIPELDAYEAEGLALDDEDVEELT(0.011)AS(0.989)QR	3	-0.11723	19	0.988	1.364	0.898		1.103	0.647	1.039	1.105	1.070	0.900	0.958	0.928	0.951	1.234	0.839		1.151	0.697	0.917	7.37E-01
P49736	13	S	DNA replication licensing factor MCM2	MCM2	0.995386	4.68E-23	144.27	AESSESFTMAS(0.005)S(0.995)PAQR	2	-0.16899	20	1.091	1.118			0.873	0.917	1.039	1.105	1.070	0.900	0.958	0.928	1.050	1.012			0.911	0.988	0.921	1.99E-01
P49736	41	S	DNA replication licensing factor MCM2	MCM2	0.999576	3.95E-14	164.22	RTDALT(0.006)S(0.994)S(1)PGR	2	0.15745	33	0.935	1.135	1.148	0.746	1.095	0.941	1.039	1.105	1.070	0.900	0.958	0.928	0.900	1.027	1.073	0.829	1.143	1.014	0.995	9.67E-01
P49736	5	S	DNA replication licensing factor MCM2	MCM2	0.830165	1.24E-08	109.87	AES(0.166)S(0.83)ES(0.001)FT(0.001)MASSPAQR	2	3.5774	1			1.25		1.126	0.624	1.039	1.105	1.070	0.900	0.958	0.928			1.168		1.175	0.672	0.791
P49756	677	S	RNA-binding protein 25	RBM25	0.999946	4.85E-28	163.51	LGASNS(1)PGQPNSVK	2	-1.0466	6		0.917	0.863	1.252	0.967		1.006	1.013	1.045	0.985	0.972	0.979		0.905	0.826	1.271	0.995		1.309	2.04E-01
P49756	583	S	RNA-binding protein 25	RBM25	1	1.96E-05	86.8	QEPES(1)EEEEEEKQEK	3	1.2416	10	1.061	0.884	0.73	1.404		0.921	1.006	1.013	1.045	0.985	0.972	0.979	1.055	0.873	0.699	1.425		0.941	1.352	2.63E-01
P49756	703	S	RNA-binding protein 25	RBM25	1	1.63E-04	81.904	FEDEDS(1)DDVPR	2	-0.97047	7	0.084	1.123	1.469	1.155	1.17		1.006	1.013	1.045	0.985	0.972	0.979	0.083	1.109	1.406	1.173	1.204		1.372	5.77E-01
P49757	634	S	Protein numb homolog	NUMB	0.999489	3.74E-16	135.95	TNPS(0.999)PTNPFSSDLQK	2	0.31378	13	0.779	0.551	0.705	1.273	0.921	1.772	1.084	1.069	1.099	0.861	0.973	0.914	0.719	0.515	0.641	1.479	0.947	1.939	2.327	4.72E-02
P49759	140	S	Dual specificity protein kinase CLK1	CLK1	1	4.10E-14	109.23	S(1)VEDDEEGHLICQSGDVLSAR	3	-0.22519	9		1.065	0.817	0.944	1.141	1.032
P49761	173	S	Dual specificity protein kinase CLK3	CLK3	0.999821	9.57E-04	83.137	S(1)YS(1)REHEGR	2	-0.10572	2	1.58		0.839	0.994	0.99	0.596	0.885	0.945	1.077	0.931	0.982	1.180	1.785		0.779	1.068	1.008	0.505	0.671	4.09E-01
P49761	283	S	Dual specificity protein kinase CLK3	CLK3	1	1.67E-32	174.62	S(1)VEDDKEGHLVCR	2	-0.34358	28	1.122	0.853	1.014	1.304	0.847	0.859	0.885	0.945	1.077	0.931	0.982	1.180	1.268	0.903	0.942	1.401	0.863	0.728	0.961	8.73E-01
P49761	157	S	Dual specificity protein kinase CLK3	CLK3	0.999999	2.61E-28	167.29	YRS(1)PEPDPYLSYR	3	-0.33187	24	0.822	1.028	0.969	1.022	1.169	0.991	0.885	0.945	1.077	0.931	0.982	1.180	0.929	1.088	0.900	1.098	1.190	0.840	1.073	5.88E-01
P49761	175	S	Dual specificity protein kinase CLK3	CLK3	0.999917	9.57E-04	83.137	S(1)YS(1)REHEGR	2	-0.10572	2	1.58		0.839	0.994	0.99	0.596	0.885	0.945	1.077	0.931	0.982	1.180	1.785		0.779	1.068	1.008	0.505	0.671	4.09E-01
P49761	224	S	Dual specificity protein kinase CLK3	CLK3	1	5.99E-09	98.573	S(1)PS(1)FGEDYYGPSR	2	0.08941	8	0.937	0.992	1.088	1.025	1.531	0.426	0.885	0.945	1.077	0.931	0.982	1.180	1.059	1.050	1.010	1.101	1.559	0.361	0.969	9.30E-01
P49761	226	S	Dual specificity protein kinase CLK3	CLK3	1	5.99E-09	98.573	S(1)PS(1)FGEDYYGPSR	2	0.08941	4	0.756	0.821	1.069	0.984	1.36	1.01	0.885	0.945	1.077	0.931	0.982	1.180	0.854	0.869	0.993	1.057	1.385	0.856	1.214	2.93E-01
P49768	367	S	Presenilin-1	PSEN1	0.980762	1.12E-26	147.67	AAVQELS(0.062)S(0.957)S(0.981)ILAGEDPEER	2	1.9129	17	1.796	0.448	1.312	1.357	0.792	0.295		1.035		1.004	1.002	0.959		0.433		1.352	0.790	0.308	1.886
P49768	365	S	Presenilin-1	PSEN1	0.750358	2.17E-05	52.898	AAVQELS(0.75)S(0.229)S(0.02)ILAGEDPEER	3	-0.16999	5			0.481			1.519		1.035		1.004	1.002	0.959						1.584
P49768	366	S	Presenilin-1	PSEN1	0.957287	5.86E-27	150.91	AAVQELS(0.062)S(0.957)S(0.981)ILAGEDPEER	2	1.9129	19	1.619	1.224	1.435	0.291	1.187	0.244		1.035		1.004	1.002	0.959		1.183		0.290	1.185	0.254	0.487
P49790	588	T	Nuclear pore complex protein Nup153	NUP153	1	1.71E-06	85.518	T(1)PPEDCEGPFRPAEILK	2	3.0162	21	1.264	1.036	0.961	0.853	0.983	0.904	1.048	1.091	1.084	0.906	0.968	0.903	1.206	0.950	0.887	0.942	1.015	1.001	0.972	7.94E-01
P49790	516	S	Nuclear pore complex protein Nup153	NUP153	0.882089	2.29E-04	71.376	VQMT(0.049)S(0.882)PS(0.049)S(0.015)T(0.004)GSPMFK	2	-0.48344	4	1.473	0.813	0.866	0.953		0.895	1.048	1.091	1.084	0.906	0.968	0.903	1.406	0.745	0.799	1.052		0.991	1.039	8.98E-01
P49790	209	S	Nuclear pore complex protein Nup153	NUP153	0.995615	2.56E-03	55.267	NTS(0.004)LPPLWS(0.996)PEAER	3	0.68857	5	1.246	0.986	1.038	0.937	0.897	0.897	1.048	1.091	1.084	0.906	0.968	0.903	1.189	0.904	0.958	1.034	0.927	0.993	0.969	7.48E-01
P49790	633	S	Nuclear pore complex protein Nup153	NUP153	0.985357	9.96E-19	133.53	IDSVAAQPT(0.001)AT(0.014)S(0.985)PVVYTR	2	1.34	8	0.603	0.67	0.532	1.332	1.53	1.332	1.048	1.091	1.084	0.906	0.968	0.903	0.575	0.614	0.491	1.470	1.581	1.475	2.694	5.00E-05
P49790	192	S	Nuclear pore complex protein Nup153	NUP153	0.999999	6.80E-08	122.45	AS(1)DKDITVSK	2	0.27274	10	1.053	1.069	1.538	0.748	0.938	0.652	1.048	1.091	1.084	0.906	0.968	0.903	1.005	0.980	1.419	0.826	0.969	0.722	0.739	1.37E-01
P49792	21	S	E3 SUMO-protein ligase RanBP2	RANBP2	0.994468	2.28E-24	129.05	YIASVQGS(0.001)T(0.004)PS(0.994)PR	2	0.57446	5		1.04	0.893		1.067		1.055	1.062	1.033	0.945	0.935	0.969		0.979	0.864		1.141		1.238
P49792	2454	S	E3 SUMO-protein ligase RanBP2	RANBP2	1	3.38E-07	113.25	DSLIT(1)PHVS(1)R	2	-0.26802	25		1.404	0.577	1.059	1.217	0.743	1.055	1.062	1.033	0.945	0.935	0.969		1.322	0.559	1.121	1.302	0.767	1.130	7.49E-01
P49792	2293	T	E3 SUMO-protein ligase RanBP2	RANBP2	0.967176	3.80E-32	153.59	LNQS(0.008)GT(0.012)S(0.012)VGT(0.967)DEESDVTQEEER	2	0.3544	8		1.03	1.203		0.907	0.86	1.055	1.062	1.033	0.945	0.935	0.969		0.970	1.165		0.970	0.888	0.870	3.21E-01
P49792	955	S	E3 SUMO-protein ligase RanBP2	RANBP2	0.999994	7.96E-26	162.29	FESPATGILS(1)PR	2	0.044574	7	1.287	1.165	1.113	0.748	0.935	0.753	1.055	1.062	1.033	0.945	0.935	0.969	1.220	1.097	1.077	0.792	1.000	0.777	0.757	3.14E-02
P49792	2251	S	E3 SUMO-protein ligase RanBP2	RANBP2	0.822864	2.15E-47	168.17	EDALDDSVSSSSVHASPLAS(0.177)S(0.823)PVR	3	-0.36165	15	0.333	1.525	2.263	0.034	1.661	0.184	1.055	1.062	1.033	0.945	0.935	0.969	0.316	1.436	2.191	0.036	1.776	0.190	0.508	4.53E-01
P49792	796	S	E3 SUMO-protein ligase RanBP2	RANBP2	1	5.97E-06	160.97	SYKYS(1)PK	2	-1.2067	12	1.067	1.073	0.936	0.994	1.067	0.863	1.055	1.062	1.033	0.945	0.935	0.969	1.011	1.010	0.906	1.052	1.141	0.891	1.053	5.57E-01
P49792	1160	S	E3 SUMO-protein ligase RanBP2	RANBP2	0.955674	2.42E-45	131.96	NHET(0.044)DGGS(0.956)AHGDDDDDGPHFEPVVPLPDK	4	-0.17476	24	1.029	1.081	1.203	0.942	0.851	0.894	1.055	1.062	1.033	0.945	0.935	0.969	0.975	1.018	1.165	0.997	0.910	0.923	0.896	1.59E-01
P49792	3207	S	E3 SUMO-protein ligase RanBP2	RANBP2	0.99924	5.45E-05	118.73	KIES(0.001)FGS(0.999)PK	2	0.29638	11	0.693	0.873	0.788	1.012	1.489	1.144	1.055	1.062	1.033	0.945	0.935	0.969	0.657	0.822	0.763	1.071	1.593	1.181	1.715	3.23E-02
P49792	799	T	E3 SUMO-protein ligase RanBP2	RANBP2	0.999143	1.41E-03	69.846	Y(0.018)S(0.983)PKT(0.999)PPR	2	0.36099	4		1.228		1.069	0.584	1.119	1.055	1.062	1.033	0.945	0.935	0.969		1.156		1.131	0.625	1.155	0.839
P49792	788	S	E3 SUMO-protein ligase RanBP2	RANBP2	0.999786	4.61E-03	128.28	YSLS(1)PSK	1	0.93093	14	1.136	0.928	1.159	0.925	0.908	0.945	1.055	1.062	1.033	0.945	0.935	0.969	1.077	0.874	1.122	0.979	0.971	0.975	0.952	5.55E-01
P49792	2246	S	E3 SUMO-protein ligase RanBP2	RANBP2	0.997492	2.14E-15	86.543	EDALDDSVS(0.001)SSSVHAS(0.997)PLAS(0.569)S(0.432)PVR	3	-0.75169	10	2.532	0.554	0.503	0.403	1.608	0.4	1.055	1.062	1.033	0.945	0.935	0.969	2.400	0.522	0.487	0.426	1.720	0.413	0.751	7.30E-01
P49792	2280	S	E3 SUMO-protein ligase RanBP2	RANBP2	0.99969	2.78E-14	157.37	SALSPSKS(1)PAK	2	0.66896	10	0.896	1.821	1.109	0.622	0.943	0.61	1.055	1.062	1.033	0.945	0.935	0.969	0.849	1.715	1.074	0.658	1.009	0.630	0.631	1.94E-01
P49792	2450	T	E3 SUMO-protein ligase RanBP2	RANBP2	0.999991	1.22E-06	113.25	DSLIT(1)PHVS(1)R	2	-0.12794	23		1.159	1.428	0.951	1.034	0.429	1.055	1.062	1.033	0.945	0.935	0.969		1.091	1.382	1.006	1.106	0.443	0.689	2.73E-01
P49792	2008	S	E3 SUMO-protein ligase RanBP2	RANBP2	0.940984	7.71E-04	43.946	T(0.059)EDS(0.941)DDIHFEPVVQMPEK	3	-0.85278	2	1.292		0.783	0.949	0.952	1.024	1.055	1.062	1.033	0.945	0.935	0.969	1.225		0.758	1.004	1.018	1.057	1.035	8.54E-01
P49792	2510	S	E3 SUMO-protein ligase RanBP2	RANBP2	1	1.57E-03	85.67	AVVS(1)PPK	2	0.060383	23	1.115	0.887	1.181	1.044	0.934	0.839	1.055	1.062	1.033	0.945	0.935	0.969	1.057	0.835	1.143	1.105	0.999	0.866	0.978	8.58E-01
P49792	1509	S	E3 SUMO-protein ligase RanBP2	RANBP2	0.999989	7.63E-16	134.32	KQS(1)LPATSIPTPASFK	2	-0.33861	9	1.08	1.375	1.461	0.571	0.85	0.664	1.055	1.062	1.033	0.945	0.935	0.969	1.024	1.295	1.414	0.604	0.909	0.685	0.589	2.55E-02
P49792	2276	S	E3 SUMO-protein ligase RanBP2	RANBP2	0.999881	1.93E-10	137.81	SALS(1)PS(0.006)KS(0.994)PAK	2	0.46879	3	1.321	1.06	1.074	0.791	0.954	0.8	1.055	1.062	1.033	0.945	0.935	0.969	1.252	0.998	1.040	0.837	1.020	0.826	0.816	1.15E-01
P49815	1452	S	Tuberin	TSC2	0.994327	1.10E-02	65.627	S(0.994)PS(0.006)GLRPR	2	1.9547	4		0.79	1.361	1.258	0.959	0.632
P49841	216	Y	Glycogen synthase kinase-3 beta	GSK3B	0.950294	2.31E-10	124.46	GEPNVS(0.05)Y(0.95)ICSR	2	-0.78256	12	1.05	1.127	0.835			0.989	1.001	1.077	0.748	1.008	0.810	1.355	1.049	1.046	1.116			0.730	0.682
P49848	660	T	Transcription initiation factor TFIID subunit 6	TAF6	1	1.88E-02	56.748	QEAGDS(1)PPPAPGT(1)PK	2	0.63052	2		0.737			1.263		0.921	1.087	0.907	1.109	1.073	0.904		0.678			1.177		1.736
P49848	653	S	Transcription initiation factor TFIID subunit 6	TAF6	1	5.04E-03	56.748	QEAGDS(1)PPPAPGT(1)PK	2	0.63052	3		0.62		1.318	1.062		0.921	1.087	0.907	1.109	1.073	0.904		0.570		1.188	0.990		1.909
P49915	332	S	GMP synthase [glutamine-hydrolyzing]	GMPS	0.895421	4.94E-03	57.267	TLNMT(0.007)T(0.097)S(0.895)PEEK	2	1.4274	1	0.818	1.012	0.907	0.919		1.344	0.927	0.969	1.078	0.981	0.963	1.082	0.882	1.044	0.841	0.937		1.242	1.181	3.17E-01
P49916	210	S	DNA ligase 3	LIG3	0.98829	2.93E-17	151.49	LTTTGQVT(0.012)S(0.988)PVK	2	0.54109	5	1.16	1.189		0.721	0.862	1.067	0.952	1.007	1.035	1.022	1.021	0.962	1.218	1.181		0.705	0.844	1.109	0.739	1.34E-01
P50402	8	S	Emerin	EMD	0.987293	5.12E-13	114.55	MDNY(0.005)ADLS(0.987)DT(0.008)ELTTLLR	2	-3.9688	11	1.314	1.109	0.987	0.937	0.715	0.939	1.122	1.034	0.960	0.945	1.038	0.901	1.171	1.073	1.028	0.992	0.689	1.042	0.832	1.96E-01
P50402	173	S	Emerin	EMD	0.851729	2.07E-05	65.423	DSAYQSIT(0.001)HYRPVS(0.147)AS(0.852)R	4	-0.13092	4		1.228		1.084	0.818	0.87	1.122	1.034	0.960	0.945	1.038	0.901		1.188		1.147	0.788	0.966	0.814
P50402	49	S	Emerin	EMD	0.999061	3.08E-79	206.76	RLS(0.999)PPS(0.001)SSAASSYSFSDLNSTR	2	-0.13562	30	0.877	1.068	0.825	1.16	1.31	0.759	1.122	1.034	0.960	0.945	1.038	0.901	0.782	1.033	0.859	1.228	1.262	0.842	1.246	2.27E-01
P50402	171	S	Emerin	EMD	0.772172	2.23E-35	166.6	DSAYQSIT(0.001)HYRPVS(0.772)AS(0.226)R	4	-0.50914	19	1.082	0.895	0.972	1.107	0.956	0.987	1.122	1.034	0.960	0.945	1.038	0.901	0.964	0.866	1.013	1.171	0.921	1.095	1.122	2.51E-01
P50479	112	S	PDZ and LIM domain protein 4	PDLIM4	0.990097	1.78E-08	109.5	IHIDPEIQDGS(0.99)PT(0.006)T(0.002)S(0.002)R	3	-0.34378	3		0.727	0.511	1.063	1.342	1.358
P50502	75	S	Hsc70-interacting protein	ST13	1	8.38E-16	95.622	KVEEDLKADEPS(1)S(1)EES(1)DLEIDK	2	0.99863	27	1.022	1.108	0.888	0.947	0.732	1.303	0.922	0.914	0.875	1.109	1.097	1.083	1.108	1.212	1.015	0.854	0.667	1.203	0.817	2.90E-01
P50502	76	S	Hsc70-interacting protein	ST13	1	8.38E-16	95.622	KVEEDLKADEPS(1)S(1)EES(1)DLEIDK	2	0.99863	38	1.112	0.971	0.968	1.036	0.812	1.102	0.922	0.914	0.875	1.109	1.097	1.083	1.206	1.062	1.106	0.934	0.740	1.018	0.798	6.97E-02
P50502	79	S	Hsc70-interacting protein	ST13	1	8.38E-16	95.622	KVEEDLKADEPS(1)S(1)EES(1)DLEIDK	2	0.99863	40	1.116	0.976	0.956	1.044	0.82	1.088	0.922	0.914	0.875	1.109	1.097	1.083	1.210	1.068	1.093	0.941	0.747	1.005	0.799	6.42E-02
P50548	489	S	ETS domain-containing transcription factor ERF	ERF	1	3.05E-02	65.535	RWS(1)EDCR	2	0.71893	1	0.853		1.363	0.736	1.048							1.000
P50548	531	S	ETS domain-containing transcription factor ERF	ERF	0.785784	2.13E-09	98.21	RVS(0.786)S(0.214)DLQHATAQLSLEHR	4	0.41478	2	1.695	0.942	0.665		0.697							1.000
P50613	170	T	Cyclin-dependent kinase 7	CDK7	0.999997	9.67E-05	123.2	AYT(1)HQVVTR	2	0.19535	20	0.733	1.367	1.334	0.758	1.032	0.775	1.116	1.119	1.136	0.952	0.824	0.853	0.657	1.222	1.174	0.796	1.252	0.909	0.969	8.95E-01
P50613	164	S	Cyclin-dependent kinase 7	CDK7	0.999973	3.14E-03	106.68	SFGS(1)PNR	2	0.30921	11	1.036	1.017	1.174	0.932	0.955	0.886	1.116	1.119	1.136	0.952	0.824	0.853	0.928	0.909	1.033	0.979	1.159	1.039	1.107	1.95E-01
P50750	186	T	Cyclin-dependent kinase 9	CDK9	0.999999	5.05E-07	120.87	NSQPNRYT(1)NR	2	-0.35565	4	1.594	1.301	1.49	0.627	0.626	0.362	0.967	0.999	0.898	1.007	1.104	1.025	1.648	1.302	1.659	0.623	0.567	0.353	0.335	2.03E-03
P50851	10	S	Lipopolysaccharide-responsive and beige-like anchor protein	LRBA	0.994656	1.32E-09	70.027	AS(0.004)EDNRVPS(0.995)PPPT(0.001)GDDGGGGGR	3	-1.2475	10	0.813	0.93	0.755	0.707	0.883	1.912	0.912	1.157	1.085	0.892	0.950	1.004	0.891	0.804	0.696	0.793	0.929	1.904	1.517	3.10E-01
P51114	420	S	Fragile X mental retardation syndrome-related protein 1	FXR1	0.996697	4.62E-13	113.42	KDELS(0.997)DWS(0.003)LAGEDDRDSR	3	0.1805	4	1.221	1.069	1.044	1.095	0.769	0.801	0.959	0.880	0.937	1.033	1.077	1.115	1.273	1.215	1.114	1.060	0.714	0.718	0.692	4.03E-02
P51116	603	S	Fragile X mental retardation syndrome-related protein 2	FXR2	1	2.41E-40	167.98	TDGS(1)IS(1)GDRQPVTVADYISR	3	-0.25589	31	0.864	0.425	0.928	0.865	1.491	1.426	0.938	0.922	0.967	1.084	1.049	1.040	0.921	0.461	0.960	0.798	1.421	1.371	1.533	1.80E-01
P51116	601	S	Fragile X mental retardation syndrome-related protein 2	FXR2	0.999986	2.41E-40	167.98	TDGS(1)IS(1)GDRQPVTVADYISR	3	-0.25589	27	0.73	0.613	0.782	1.274	1.348	1.253	0.938	0.922	0.967	1.084	1.049	1.040	0.778	0.665	0.809	1.175	1.285	1.205	1.628	9.98E-04
P51397	51	S	Death-associated protein 1	DAP	0.994208	1.28E-16	96.634	DKDDQEWES(0.004)PS(0.994)PPKPT(0.002)VFISGVIAR	3	-1.2656	14	0.997	0.854		1.016	0.975	1.158
P51531	1377	S	Probable global transcription activator SNF2L2	SMARCA2	1	2.91E-05	86.367	GRPPAEKLS(1)PNPPK	3	-2.8936	17	1.046	0.974	0.732	0.994	0.976	1.278	1.158	1.178	1.010	0.882	0.945	0.826	0.903	0.827	0.725	1.127	1.033	1.547	1.510	6.61E-02
P51531	1572	S	Probable global transcription activator SNF2L2	SMARCA2	1	4.42E-26	150.13	AKPVVSDFDS(1)DEEQDER	3	-0.44949	12	0.838	0.846	0.913	1.279	1.163	0.96	1.158	1.178	1.010	0.882	0.945	0.826	0.724	0.718	0.904	1.450	1.231	1.162	1.638	9.29E-03
P51532	613	S	Transcription activator BRG1	SMARCA4	0.948608	7.93E-11	61.082	KAENAEGQT(0.004)PAIGPDGEPLDET(0.324)S(0.724)QMS(0.949)DLPVK	3	0.22028	5		1.156	0.739	1.219	1.014	0.871	1.069	1.082	1.016	0.944	0.914	0.975		1.068	0.727	1.291	1.109	0.893	1.223	3.81E-01
P51532	695	S	Transcription activator BRG1	SMARCA4	0.999612	1.56E-15	128.38	IPDPDS(1)DDVSEVDAR	2	0.064401	12	1.373	0.854	1.262	0.896	0.678	0.938	1.069	1.082	1.016	0.944	0.914	0.975	1.284	0.789	1.242	0.949	0.742	0.962	0.800	2.73E-01
P51532	1631	S	Transcription activator BRG1	SMARCA4	1	3.87E-26	151.3	AKPVVS(1)DDDS(1)EEEQEEDR	2	0.8829	36	1.637	1.512	1.517	0.479	0.619	0.236	1.069	1.082	1.016	0.944	0.914	0.975	1.531	1.397	1.493	0.507	0.677	0.242	0.323	1.67E-03
P51532	1417	S	Transcription activator BRG1	SMARCA4	0.999981	7.27E-11	112.35	KRDS(1)DAGSSTPTTSTR	3	-0.37668	5	1.085	0.255	0.953	1.707			1.069	1.082	1.016	0.944	0.914	0.975	1.015	0.236	0.938	1.808			2.479
P51532	1382	S	Transcription activator BRG1	SMARCA4	0.844178	4.75E-03	55.335	EVDY(0.001)S(0.078)DS(0.844)LT(0.078)EK	2	2.4669	1		0.817	1.241	0.944	1.373	0.624	1.069	1.082	1.016	0.944	0.914	0.975		0.755	1.221	1.000	1.502	0.640	1.060	8.82E-01
P51532	1452	S	Transcription activator BRG1	SMARCA4	1	1.26E-45	175.33	LS(1)PNPPNLTK	2	0.39064	71	1.458	1.346	0.989	0.685	1.093	0.43	1.069	1.082	1.016	0.944	0.914	0.975	1.364	1.244	0.973	0.726	1.196	0.441	0.660	1.77E-01
P51532	609	T	Transcription activator BRG1	SMARCA4	0.81828	4.81E-10	58.98	KAENAEGQTPAIGPDGEPLDET(0.818)S(0.243)QMS(0.938)DLPVK	3	0.69467	4		1.161	0.742	1.223		0.874	1.069	1.082	1.016	0.944	0.914	0.975		1.073	0.730	1.296		0.896	1.216	5.37E-01
P51608	229	S	Methyl-CpG-binding protein 2	MECP2	0.796562	2.34E-04	84.892	MPFQT(0.203)S(0.797)PGGK	2	-1.5183	5	1.343	0.968	1.068	0.812	0.95	0.86	0.846	1.080	1.314	0.797	1.076	0.886	1.587	0.896	0.813	1.019	0.883	0.971	0.871	6.00E-01
P51608	80	S	Methyl-CpG-binding protein 2	MECP2	0.99644	2.74E-17	117.83	AETSEGSGSAPAVPEAS(0.004)AS(0.996)PK	2	0.23101	17	0.98	1.039	0.899	1.055	1.08	0.946	0.846	1.080	1.314	0.797	1.076	0.886	1.158	0.962	0.684	1.324	1.004	1.068	1.211	3.08E-01
P51610	6	S	Host cell factor 1	HCFC1	0.999906	9.98E-46	174.19	ASAVS(1)PANLPAVLLQPR	2	0.56211	17	0.942	0.815	0.904	1.069	1.085	1.186	0.984	0.955	1.018	1.039	0.998	1.005	0.957	0.853	0.888	1.029	1.087	1.180	1.221	2.06E-02
P51610	598	S	Host cell factor 1	HCFC1	0.797175	5.06E-10	111.22	VAS(0.203)S(0.797)PVMVSNPATR	2	0.36842	2	0.581	0.7	0.481	1.38	1.475	1.383	0.984	0.955	1.018	1.039	0.998	1.005	0.590	0.733	0.472	1.328	1.478	1.376	2.329	8.05E-04
P51610	1507	S	Host cell factor 1	HCFC1	0.999983	7.61E-22	89.889	AVTTVTQSTPVPGPSVPPPEELQVS(1)PGPR	4	-0.32607	25	1	1.041	0.832	1.14	1.054	0.934	0.984	0.955	1.018	1.039	0.998	1.005	1.016	1.090	0.817	1.097	1.056	0.929	1.054	6.10E-01
P51610	666	S	Host cell factor 1	HCFC1	0.987252	8.43E-10	108.14	S(0.987)PIS(0.013)VPGGSALISNLGK	2	0.58868	7	0.511	0.447	0.329	1.511	1.729	1.473	0.984	0.955	1.018	1.039	0.998	1.005	0.519	0.468	0.323	1.454	1.732	1.466	3.550	5.02E-04
P51636	36	S	Caveolin-2	CAV2	1	1.12E-19	155.57	FADS(1)DQDRDPHR	2	2.2836	12	0.617	1.001	1.296	0.87	1.421	0.794	1.002	1.071	1.154	1.030	1.076	0.667	0.616	0.935	1.123	0.845	1.321	1.190	1.255	3.30E-01
P51636	23	S	Caveolin-2	CAV2	0.891436	5.47E-08	61.186	ADVQLFMDDDS(0.037)Y(0.033)S(0.037)HHS(0.891)GLEY(0.002)ADPEK	4	0.27789	2			0.559		1.441		1.002	1.071	1.154	1.030	1.076	0.667			0.484		1.339		2.765
P51812	365	T	Ribosomal protein S6 kinase alpha-3	RPS6KA3	0.774004	1.75E-07	86.557	T(0.774)PKDS(0.226)PGIPPSANAHQLFR	3	1.43	3	0.977					1.023	0.960	0.971	1.056	0.988	0.951	1.074	1.018					0.953	0.936
P51812	715	S	Ribosomal protein S6 kinase alpha-3	RPS6KA3	1	8.11E-05	83.243	NQS(1)PVLEPVGR	2	1.8221	6	0.88	0.828	0.766	0.934	1.194	1.398	0.960	0.971	1.056	0.988	0.951	1.074	0.917	0.853	0.725	0.945	1.256	1.302	1.404	5.51E-02
P51812	369	S	Ribosomal protein S6 kinase alpha-3	RPS6KA3	0.999965	5.40E-08	86.557	DS(1)PGIPPSANAHQLFR	3	0.059191	16		1.029	0.701	0.511	1.198	1.561	0.960	0.971	1.056	0.988	0.951	1.074		1.060	0.664	0.517	1.260	1.453	1.249	6.26E-01
P51825	212	S	AF4/FMR2 family member 1	AFF1	0.997773	1.65E-12	70.501	ELS(0.997)PLIS(0.03)LPS(0.974)PVPPLS(0.998)PIHS(0.002)NQQTLPR	3	-0.042782	9	1.367	0.705	0.707	1.282	1.099	0.84
P51825	206	S	AF4/FMR2 family member 1	AFF1	0.991385	1.65E-12	70.501	ELS(0.982)PLIS(0.026)LPS(0.991)PVPPLS(0.995)PIHS(0.005)NQQTLPR	4	-0.61249	7	1.007	0.904	0.907	1.178	0.927	1.077
P51825	245	S	AF4/FMR2 family member 1	AFF1	1	2.00E-03	77.26	GYCPAKS(1)PK	2	0.24845	3		0.716	0.626	1.906	0.868	0.884
P51825	199	S	AF4/FMR2 family member 1	AFF1	0.999725	1.65E-12	70.501	ELS(1)PLIS(0.091)LPS(0.917)PVPPLS(0.97)PIHS(0.02)NQQT(0.002)LPR	3	0.40211	9	1.367	0.705	0.707	1.282	1.099	0.84
P51858	165	S	Hepatoma-derived growth factor	HDGF	1	7.12E-22	182.37	RAGDLLEDS(1)PK	3	-0.074687	45	1.093	0.664	0.866	1.302	0.936	1.139	0.976	0.897	0.935	1.135	0.998	1.059	1.120	0.740	0.926	1.147	0.938	1.076	1.134	3.77E-01
P51858	132	S	Hepatoma-derived growth factor	HDGF	1	8.82E-24	139.47	KGNAEGS(1)S(1)DEEGKLVIDEPAK	3	0.022489	58	1.346	0.942	0.8	0.893	1.158	0.86	0.976	0.897	0.935	1.135	0.998	1.059	1.379	1.050	0.856	0.787	1.160	0.812	0.840	4.19E-01
P51858	133	S	Hepatoma-derived growth factor	HDGF	1	8.82E-24	139.47	KGNAEGS(1)S(1)DEEGKLVIDEPAK	3	0.022489	67	1.3	0.928	0.833	0.921	1.115	0.903	0.976	0.897	0.935	1.135	0.998	1.059	1.332	1.035	0.891	0.811	1.117	0.853	0.854	3.81E-01
P51946	315	T	Cyclin-H	CCNH	0.999999	1.23E-08	101.38	HEEEEWT(1)DDDLVESL	2	-0.42886	22	1.05	1.091	1.05	1.019	0.882	0.909	0.993	1.073	1.072	0.894	1.074	0.894	1.057	1.017	0.979	1.140	0.821	1.017	0.975	8.04E-01
P51991	358	S	Heterogeneous nuclear ribonucleoprotein A3	HNRNPA3	0.995179	4.44E-80	212.04	S(0.002)S(0.002)GS(0.995)PYGGGYGSGGGSGGYGSR	2	-0.2463	37	0.919	0.949	1.196	0.82	1.095	1.021	1.120	1.080	1.036	0.911	0.915	0.937	0.821	0.879	1.154	0.900	1.197	1.090	1.117	4.56E-01
P51991	14	S	Heterogeneous nuclear ribonucleoprotein A3	HNRNPA3	1	5.65E-06	89.859	MEVKPPPGRPQPDS(1)GR	3	-0.69177	27	0.981	1.177	0.98	0.75	1.215	0.897	1.120	1.080	1.036	0.911	0.915	0.937	0.876	1.090	0.946	0.823	1.328	0.957	1.068	7.09E-01
P52292	62	S	Importin subunit alpha-1	KPNA2	0.973192	5.42E-58	187.73	NVSS(0.001)FPDDAT(0.026)S(0.973)PLQENR	2	0.50481	20	0.829	0.78	0.755	1.35	1.15	1.136	0.961	0.954	0.950	1.031	1.058	1.046	0.863	0.818	0.795	1.309	1.087	1.086	1.407	1.20E-02
P52594	181	S	Arf-GAP domain and FG repeat-containing protein 1	AGFG1	0.996246	6.14E-05	86.699	GT(0.001)PS(0.003)QS(0.996)PVVGR	2	0.47909	4	0.964	0.774	0.626	1.519	1.117		0.983	1.023	1.059	1.014	0.952	0.970	0.981	0.757	0.591	1.498	1.173		1.721	5.98E-02
P52701	137	S	DNA mismatch repair protein Msh6	MSH6	0.948573	3.42E-14	125.5	VHVQFFDDS(0.949)PT(0.051)R	3	-0.30734	14	1.217	0.909	0.749	1.038	0.958	1.129	0.966	1.042	0.971	0.917	0.996	1.109	1.260	0.872	0.771	1.132	0.962	1.018	1.072	6.81E-01
P52701	254	S	DNA mismatch repair protein Msh6	MSH6	0.909917	9.85E-09	67.658	VIS(0.941)DS(0.91)ES(0.729)DIGGS(0.42)DVEFKPDT(0.001)K	3	-0.73219	6	0.828	1.088	0.823	1.175		1.086	0.966	1.042	0.971	0.917	0.996	1.109	0.857	1.044	0.848	1.281		0.979	1.234	2.23E-01
P52701	252	S	DNA mismatch repair protein Msh6	MSH6	0.941091	4.65E-09	73.934	VIS(0.941)DS(0.577)ES(0.511)DIGGS(0.97)DVEFKPDTK	3	-1.1185	10	0.712	1.468	1.098	0.56	0.831	1.329	0.966	1.042	0.971	0.917	0.996	1.109	0.737	1.409	1.131	0.611	0.834	1.198	0.807	4.61E-01
P52701	261	S	DNA mismatch repair protein Msh6	MSH6	0.995973	3.76E-09	75.524	VIS(0.001)DS(0.001)ES(0.001)DIGGS(0.996)DVEFKPDTK	3	-0.043816	14	1.358	1.297	1.078	0.488	1.147	0.632	0.966	1.042	0.971	0.917	0.996	1.109	1.406	1.245	1.110	0.532	1.152	0.570	0.599	8.25E-02
P52701	830	S	DNA mismatch repair protein Msh6	MSH6	1	1.79E-05	114.79	IHNVGS(1)PLK	2	-0.0080532	1	1.193	1.057	0.811		0.843	1.096	0.966	1.042	0.971	0.917	0.996	1.109	1.235	1.014	0.835		0.846	0.988	0.892	5.34E-01
P52701	227	S	DNA mismatch repair protein Msh6	MSH6	1	4.77E-24	153.36	SEEDNEIES(1)EEEVQPK	2	0.27761	18	1.207	1.232	0.83	1.057	1	0.674	0.966	1.042	0.971	0.917	0.996	1.109	1.249	1.182	0.855	1.153	1.004	0.608	0.841	4.40E-01
P52732	926	T	Kinesin-like protein KIF11	KIF11	0.998407	8.31E-11	134.04	LDIPTGT(0.002)T(0.998)PQR	2	-1.5629	10	1.299	0.625		1.179	0.977	0.919	1.046	0.849	0.850	1.143	1.070	1.041	1.242	0.736		1.031	0.913	0.883	0.953	8.29E-01
P52737	292	S	Zinc finger protein 136	ZNF136	0.993179	8.36E-03	59.739	AFS(0.002)CS(0.993)PT(0.005)LR	2	0.18287	3	0.833					1.167
P52756	59	S	RNA-binding protein 5	RBM5	1	1.53E-16	144.18	YDDYRDYDS(1)PER	2	-0.40442	26	0.814	1.181	0.824	0.818	1.068	1.296	0.963	1.001	0.938	1.081	1.043	0.974	0.845	1.180	0.878	0.757	1.024	1.331	1.072	7.43E-01
P52756	624	S	RNA-binding protein 5	RBM5	0.999939	2.34E-46	172.83	GLVAAYSGDS(1)DNEEELVER	3	-0.28062	16	1.002	0.938	0.795	1.09	1.029	1.145	0.963	1.001	0.938	1.081	1.043	0.974	1.040	0.937	0.848	1.008	0.987	1.176	1.122	2.32E-01
P52799	260	S	Ephrin-B2	EFNB2	0.997678	2.30E-14	121.39	KHS(0.998)PQHT(0.002)TTLSLSTLATPK	3	0.22236	22	1.579	0.768	0.938	0.983	0.929	0.805
P52907	9	S	F-actin-capping protein subunit alpha-1	CAPZA1	1	4.80E-05	85.576	ADFDDRVS(1)DEEK	2	1.0785	4	1.59	0.849	0.674	1.002	0.771	1.114	0.949	0.877	0.879	1.064	1.113	1.118	1.675	0.968	0.767	0.942	0.693	0.996	0.771	4.22E-01
P52926	44	S	High mobility group protein HMGI-C	HMGA2	0.999605	2.36E-39	192.32	KQQQEPTGEPS(1)PK	2	0.25831	7	1.137	1.102	1.617	0.961	0.75	0.433
P52948	934	S	Nuclear pore complex protein Nup98-Nup96	NUP98	0.999723	3.20E-58	187.73	PAPPPQSQS(1)PEVEQLGR	2	0.050813	38	1.187	0.774	1.063	1.111	0.853	1.011	1.066	1.111	1.145	0.900	0.900	0.877	1.114	0.697	0.928	1.234	0.948	1.153	1.218	2.49E-01
P52948	1028	S	Nuclear pore complex protein Nup98-Nup96	NUP98	1	5.62E-10	128.95	ADTSQEICS(1)PR	2	0.03683	8	1.042	0.975	1.211	0.863	1.136	0.773	1.066	1.111	1.145	0.900	0.900	0.877	0.977	0.878	1.058	0.959	1.262	0.881	1.065	6.45E-01
P52948	839	S	Nuclear pore complex protein Nup98-Nup96	NUP98	1	2.46E-03	81.676	CLIKS(1)PDR	3	-0.13508	4	1.177	1.195	1.074	1.005	0.714	0.835	1.066	1.111	1.145	0.900	0.900	0.877	1.104	1.076	0.938	1.117	0.793	0.952	0.918	4.69E-01
P52948	1023	S	Nuclear pore complex protein Nup98-Nup96	NUP98	0.986129	3.36E-09	124.47	ADT(0.014)S(0.986)QEICSPR	2	0.21653	8	0.969	1.254	1.172	0.848	1.127	0.63	1.066	1.111	1.145	0.900	0.900	0.877	0.909	1.129	1.024	0.942	1.252	0.718	0.951	7.82E-01
P52948	888	S	Nuclear pore complex protein Nup98-Nup96	NUP98	1	2.18E-23	145.71	YGLQDS(1)DEEEEEHPSK	2	-0.52529	26	1.186	1.229	1.053	0.75	0.83	0.951	1.066	1.111	1.145	0.900	0.900	0.877	1.113	1.106	0.920	0.833	0.922	1.084	0.905	3.63E-01
P52948	670	T	Nuclear pore complex protein Nup98-Nup96	NUP98	0.999977	7.32E-17	153.32	PIPQT(1)PESAGNK	2	-0.42595	22	1.111	0.806	1.339	0.92	0.898	0.926	1.066	1.111	1.145	0.900	0.900	0.877	1.042	0.725	1.169	1.022	0.998	1.056	1.047	7.46E-01
P52948	623	S	Nuclear pore complex protein Nup98-Nup96	NUP98	0.999926	9.37E-46	178.71	DSENLAS(1)PSEYPENGER	2	-0.59136	20	1.08	0.96	1.47	0.966	0.855	0.669	1.066	1.111	1.145	0.900	0.900	0.877	1.013	0.864	1.284	1.073	0.950	0.763	0.881	4.58E-01
P53350	214	T	Serine/threonine-protein kinase PLK1	PLK1	0.843158	3.29E-07	88.09	KKT(0.157)LCGT(0.843)PNYIAPEVLSK	3	0.56099	5	1.256	1.064		0.966	0.947	0.768	1.101	0.854	0.931	0.917	0.990	1.207	1.141	1.246		1.053	0.957	0.636	0.739	1.60E-01
P53396	481	S	ATP-citrate synthase	ACLY	0.999254	2.93E-10	120.11	AKPAMPQDS(0.001)VPS(0.999)PR	3	0.17747	19	1.166	0.614	1.026	1.379	0.884	0.932	0.964	0.986	0.963	0.981	1.081	1.025	1.210	0.623	1.065	1.406	0.818	0.909	1.081	7.73E-01
P53396	455	S	ATP-citrate synthase	ACLY	0.999873	6.98E-11	169.92	TAS(1)FSESR	2	-0.18127	4	0.693	0.966	0.667	1.143	1.371	1.159	0.964	0.986	0.963	0.981	1.081	1.025	0.719	0.980	0.693	1.165	1.268	1.131	1.491	1.77E-02
P53611	3	T	Geranylgeranyl transferase type-2 subunit beta	RABGGTB	1	4.33E-04	76.358	GT(1)PQKDVIIK	2	0.55311	2	1.052		1.067	1.003	0.889	0.99			0.985		1.545	0.470			1.083		0.575	2.106	1.238
P53621	591	T	Coatomer subunit alpha	COPA	0.999979	1.10E-04	101.89	VLT(1)IDPTEFK	2	0.8374	7	0.972		0.964	1.122	1.068	0.875	0.922	0.961	0.938	1.056	1.056	1.066	1.054		1.028	1.063	1.011	0.821	0.927	4.84E-01
P53621	173	S	Coatomer subunit alpha	COPA	1	5.51E-20	158.89	NLS(1)PGAVESDVR	2	0.2043	11	0.921	0.857	0.763	1.044	1.397	1.018	0.922	0.961	0.938	1.056	1.056	1.066	0.999	0.892	0.813	0.989	1.323	0.955	1.208	2.20E-01
P53674	8	S	Beta-crystallin B1	CRYBB1	0.952222	2.35E-04	63.46	AS(0.952)AS(0.047)AT(0.001)VAVNPGPDTK	2	0.56894	7	1.124	1.051	1.223	0.844		0.757
P53985	467	S	Monocarboxylate transporter 1	SLC16A1	0.852679	2.63E-10	110.6	EEET(0.147)S(0.853)IDVAGKPNEVTK	2	0.28131	17	0.854	1.298	1.062	0.936	1.078	0.772	0.922	1.230	1.087	0.931	0.898	0.931	0.926	1.055	0.977	1.005	1.200	0.829	1.026	8.33E-01
P53985	461	S	Monocarboxylate transporter 1	SLC16A1	1	8.32E-69	214.26	KES(1)KEEETSIDVAGK	2	1.6273	14	0.81	0.939	0.969	1.273	0.97	1.04	0.922	1.230	1.087	0.931	0.898	0.931	0.879	0.763	0.891	1.367	1.080	1.117	1.407	2.55E-02
P53999	11	S	Activated RNA polymerase II transcriptional coactivator p15	SUB1	0.885735	9.80E-46	169.85	ELVS(0.003)S(0.012)S(0.886)S(0.098)S(0.001)GSDSDSEVDKK	2	0.28235	24	0.587	1.625	0.897		0.891		1.001	0.892	1.102	0.839	1.028	1.138	0.586	1.822	0.814		0.867		0.807
P53999	19	S	Activated RNA polymerase II transcriptional coactivator p15	SUB1	0.99995	1.11E-58	192.27	ELVSSSSSGS(0.005)DS(0.995)DS(1)EVDKK	3	1.2392	91	1.602	0.885	1.524	0.697	0.587	0.706	1.001	0.892	1.102	0.839	1.028	1.138	1.600	0.992	1.383	0.831	0.571	0.620	0.509	2.88E-02
P53999	10	S	Activated RNA polymerase II transcriptional coactivator p15	SUB1	0.849288	1.61E-45	180.66	ELVS(0.965)S(0.849)S(0.184)S(0.002)SGS(0.007)DS(0.596)DS(0.397)EVDKK	2	0.035459	32	1.108	1.422			0.506	0.964	1.001	0.892	1.102	0.839	1.028	1.138	1.107	1.594			0.492	0.847	0.496	1.52E-01
P53999	9	S	Activated RNA polymerase II transcriptional coactivator p15	SUB1	0.995936	3.50E-45	177.32	ELVS(0.996)S(0.004)SSSGSDS(0.006)DS(0.994)EVDKK	2	0.70434	43	0.847	0.755	0.749	0.97	2.087	0.592	1.001	0.892	1.102	0.839	1.028	1.138	0.846	0.846	0.680	1.156	2.030	0.520	1.562	3.70E-01
P53999	17	S	Activated RNA polymerase II transcriptional coactivator p15	SUB1	0.9948	1.19E-46	181.85	ELVSSSSSGS(0.005)DS(0.995)DS(1)EVDKK	3	1.2392	104	1.201	1.087	0.921	0.953	1.116	0.722	1.001	0.892	1.102	0.839	1.028	1.138	1.200	1.219	0.836	1.136	1.086	0.634	0.878	5.48E-01
P54105	102	S	Methylosome subunit pICln	CLNS1A	1	1.66E-45	153.27	EPVADEEEEDS(1)DDDVEPITEFR	2	-0.85697	53	0.84	0.747	0.929	1.391	1.074	1.019						1.000						1.019
P54132	328	S	Bloom syndrome protein	BLM	0.942272	1.86E-07	71.592	DLDT(0.053)S(0.942)DRKEDVLS(0.003)T(0.001)SK	3	-1.0524	3	1.644	0.924	0.96		0.471		1.055	1.036	1.122	0.877	0.975	0.936	1.558	0.892	0.856		0.483		0.438
P54198	614	S	Protein HIRA	HIRA	0.917978	1.11E-03	44.641	DLLES(0.694)S(0.694)S(0.694)DS(0.918)DEKVPLAK	2	-1.037	1	1.264					0.736			1.000
P54259	661	S	Atrophin-1	ATN1	0.980529	7.35E-06	88.548	TAT(0.001)PPGY(0.001)KPGS(0.981)PPS(0.018)FR	3	0.25529	12	0.896	1.088	1.041	1.324	1.383	0.269			1.535	1.373	0.519	0.573			0.678	0.964	2.665	0.469	2.014
P54259	632	S	Atrophin-1	ATN1	0.985616	9.85E-05	74.649	T(0.014)AS(0.986)PPGPPPYGK	2	1.6791	12	1.113	0.779	0.936	1.188		0.983			1.535	1.373	0.519	0.573			0.610	0.865		1.716	2.116
P54259	168	S	Atrophin-1	ATN1	0.999984	5.57E-11	92.01	PYHPPPLFPPS(1)PQPPDSTPR	3	-0.094055	15	1.073	0.866	0.77	0.955	1.269	1.067			1.535	1.373	0.519	0.573			0.502	0.696	2.445	1.862	3.324
P54259	645	S	Atrophin-1	ATN1	1	1.21E-03	88.948	APS(1)PGAYK	2	0.31474	6	0.817	0.78	0.778	0.888	1.075	1.663			1.535	1.373	0.519	0.573			0.507	0.647	2.071	2.902	3.696
P54259	107	S	Atrophin-1	ATN1	0.850999	4.62E-04	43.696	TEQELPRPQS(0.038)PS(0.111)DLDS(0.851)LDGR	3	2.29	1			0.695	1.305					1.535	1.373	0.519	0.573			0.453	0.950			2.099
P54259	34	S	Atrophin-1	ATN1	0.999998	3.56E-50	177.94	GRAS(1)PGGVSTSSSDGK	2	0.57387	5	1.151			0.888	1.207	0.755			1.535	1.373	0.519	0.573				0.647	2.326	1.318
P54259	101	S	Atrophin-1	ATN1	0.960763	3.54E-13	104.53	TEQELPRPQS(0.961)PS(0.039)DLDSLDGR	3	0.14633	7	0.943	0.951	0.972	1.188	0.946				1.535	1.373	0.519	0.573			0.633	0.865	1.823		2.122
P54259	653	T	Atrophin-1	ATN1	0.996492	3.07E-05	87.447	T(0.002)AT(0.996)PPGY(0.001)KPGSPPSFR	3	0.67792	4		0.556		0.545	0.557	2.343			1.535	1.373	0.519	0.573				0.397	1.073	4.089
P54274	11	S	Telomeric repeat-binding factor 1	TERF1	0.999276	3.31E-07	100.77	AEDVSS(0.001)AAPS(0.999)PR	2	-1.7361	2	1.044	1.119				0.837
P54578	143	S	Ubiquitin carboxyl-terminal hydrolase 14	USP14	0.893494	2.45E-04	58.024	AS(0.893)GEMAS(0.106)AQYITAALR	3	1.417	2		0.979			1.021		0.880	0.938	0.949	1.101	1.126	1.006		1.044			0.907		0.869
P54709	8	S	Sodium/potassium-transporting ATPase subunit beta-3	ATP1B3	1	3.75E-09	125.89	S(1)LNQSLAEWK	2	1.5366	3	1.189	0.912				0.899	1.017	0.982	1.085	0.923	0.982	1.012	1.169	0.929				0.888	0.847
P54725	123	S	UV excision repair protein RAD23 homolog A	RAD23A	0.854989	4.77E-16	78.552	EDKS(0.855)PS(0.135)EES(0.005)APT(0.002)T(0.002)S(0.001)PESVSGSVPSSGSSGR	3	0.28418	11	0.665		0.569	1.156	1.609		0.955	1.126	1.100	0.931	0.932	0.956	0.696		0.517	1.242	1.726		2.446	7.69E-02
P54727	160	S	UV excision repair protein RAD23 homolog B	RAD23B	0.958082	4.09E-65	188.23	PAETPVAT(0.036)S(0.958)PT(0.006)ATDSTSGDSSR	2	-0.02813	29	1.255	1.289	0.771	0.057	1.264	1.364	0.951	0.952	0.894	1.118	1.016	1.069	1.320	1.354	0.862	0.051	1.244	1.276	0.727	4.99E-01
P55081	53	S	Microfibrillar-associated protein 1	MFAP1	0.764014	8.99E-10	80.142	RPDYAPMES(0.236)S(0.764)DEEDEEFQFIK	3	-0.47226	3			1.078		1.2	0.722	0.929	0.852	1.016	1.122	0.842	1.240			1.061		1.425	0.582	0.946
P55081	116	S	Microfibrillar-associated protein 1	MFAP1	1	1.07E-23	139.04	IVEPEVVGES(1)DS(1)EVEGDAWR	2	-0.056567	30	0.977	0.888	1.411	0.915	0.918	0.892	0.929	0.852	1.016	1.122	0.842	1.240	1.052	1.042	1.389	0.816	1.090	0.719	0.754	1.47E-01
P55081	118	S	Microfibrillar-associated protein 1	MFAP1	1	1.29E-39	155.17	IVEPEVVGES(1)DS(1)EVEGDAWR	2	-0.056567	42	0.931	1.026	0.944	1.095	0.979	1.025	0.929	0.852	1.016	1.122	0.842	1.240	1.002	1.204	0.929	0.976	1.163	0.827	0.946	6.79E-01
P55081	267	T	Microfibrillar-associated protein 1	MFAP1	1	2.50E-28	138.03	SLAALDALNT(1)DDENDEEEYEAWK	2	-0.3591	15	1	0.971	1.392	0.986	0.686	0.964	0.929	0.852	1.016	1.122	0.842	1.240	1.076	1.140	1.370	0.879	0.815	0.777	0.689	1.68E-02
P55081	361	S	Microfibrillar-associated protein 1	MFAP1	0.999961	5.25E-07	77.372	DFS(1)APTLEDHFNK	3	-0.25732	3		0.983			1.017		0.929	0.852	1.016	1.122	0.842	1.240		1.154			1.208		1.047
P55196	1721	S	Afadin	AFDN	0.995466	1.35E-10	123.28	TQVLS(0.995)PDS(0.004)LFTAK	2	-0.75177	4	1.087	0.813	0.773	1.189	1.227	0.911	1.033	1.083	1.042	0.914	0.984	0.944	1.052	0.751	0.742	1.301	1.247	0.965	1.380	9.13E-02
P55196	1182	S	Afadin	AFDN	1	4.08E-23	150.18	SSPNVANQPPS(1)PGGK	2	0.31936	23	0.947	0.842	1.136	1.03	1.088	0.958	1.033	1.083	1.042	0.914	0.984	0.944	0.917	0.777	1.090	1.127	1.106	1.015	1.166	1.86E-01
P55196	1779	S	Afadin	AFDN	0.999629	4.44E-19	126.04	SQDADS(1)PGSSGAPENLTFK	2	-1.3817	21	1.112	1.047	0.946	0.805	1.35	0.741	1.033	1.083	1.042	0.914	0.984	0.944	1.076	0.967	0.908	0.881	1.372	0.785	1.029	8.86E-01
P55196	1275	S	Afadin	AFDN	1	2.55E-05	132.03	S(1)QEELREDK	2	2.4992	7	0.897			1.05		1.053	1.033	1.083	1.042	0.914	0.984	0.944	0.868			1.149		1.115	1.304
P55196	1083	S	Afadin	AFDN	0.999846	1.51E-08	119.88	TSS(1)VVTLEVAK	2	0.274	6	1.137	1.13	1.193	0.756	0.784		1.033	1.083	1.042	0.914	0.984	0.944	1.101	1.043	1.145	0.827	0.797		0.741	5.56E-03
P55197	689	S	Protein AF-10	MLLT10	0.999618	1.78E-05	115.04	S(1)PVSSLQIR	2	0.052904	10	0.996	1.349	0.66	0.832	1.074	1.089
P55198	382	S	Protein AF-17	MLLT6	0.809013	6.26E-05	49.528	YSKPTAPAPS(0.002)APPS(0.809)PS(0.189)APEPPK	3	0.22684	3	1.263	0.499		1.238
P55198	423	S	Protein AF-17	MLLT6	0.999998	1.61E-02	68.485	APS(1)PGDYK	2	0.44844	4		1.176	0.941		0.815	1.069
P55198	258	S	Protein AF-17	MLLT6	0.973654	3.59E-12	110.89	RPES(0.974)PPS(0.026)ILTPPVVPTADK	3	-0.5646	17	1.267	0.965	0.878	0.931	1.143	0.816
P55199	309	S	RNA polymerase II elongation factor ELL	ELL	0.93621	3.27E-15	90.946	LCQPQSTGSLLGDPAAS(0.064)S(0.936)PPGER	2	-0.40077	10		1.123	1.011	0.829	1.038		1.007		1.082		0.910				0.934		1.141		1.221
P55209	62	T	Nucleosome assembly protein 1-like 1	NAP1L1	0.992221	1.66E-10	110.56	LDGLVET(0.992)PT(0.008)GYIESLPR	3	-0.57997	8	0.998	0.953	0.735	1.483		0.831	0.974	0.969	0.970	1.088	0.960	1.039	1.025	0.983	0.758	1.363		0.800	1.173	5.47E-01
P55265	614	S	Double-stranded RNA-specific adenosine deaminase	ADAR	0.999659	9.98E-16	139.64	S(1)PVTTLLECMHK	2	-1.0547	9	1.563	0.806	1.208	0.825	1.052	0.545	0.972	1.017	1.046	0.939	0.981	1.046	1.608	0.793	1.155	0.879	1.072	0.521	0.695	2.75E-01
P55265	601	T	Double-stranded RNA-specific adenosine deaminase	ADAR	0.985195	1.97E-08	99.603	TAES(0.013)QT(0.985)PT(0.002)PSATSFFSGK	2	0.32169	8	1.054	1.15	0.943		0.987	0.867	0.972	1.017	1.046	0.939	0.981	1.046	1.084	1.131	0.902		1.006	0.829	0.883	3.57E-01
P55327	171	S	Tumor protein D52	TPD52	0.946775	3.36E-08	117.2	KLEDVKNS(0.947)PT(0.053)FK	3	-0.075617	5	0.472	1.082	0.969	1.255	1.472	0.749	1.071	0.920	0.952	1.014	0.967	1.077	0.441	1.176	1.018	1.238	1.522	0.695	1.312	4.53E-01
P56181	105	S	NADH dehydrogenase [ubiquinone] flavoprotein 3, mitochondrial	NDUFV3	0.997089	9.85E-10	113.37	MPQPSS(0.003)GRES(0.997)PR	3	0.31833	10	0.814	1.165	1.17	0.666	1.206	0.98	1.303	1.363	1.006	0.843	0.823	0.662	0.625	0.855	1.163	0.790	1.465	1.480	1.414	2.57E-01
P56182	383	S	Ribosomal RNA processing protein 1 homolog A	RRP1	1	5.58E-03	63.473	EPPS(1)PGMER	2	0.079676	3	1.227	1.105	1.088	0.975	0.694	0.911	1.076	1.098	1.040	0.921	0.918	0.948	1.140	1.006	1.046	1.059	0.756	0.961	0.869	2.27E-01
P56945	639	S	Breast cancer anti-estrogen resistance protein 1	BCAR1	1	3.51E-03	83.456	PLPS(1)PPK	2	0.040812	19	0.933	0.843	1.023	1.093	1.145	0.964	1.116	1.066	1.145	0.908	0.827	0.938	0.836	0.791	0.893	1.204	1.385	1.028	1.435	2.71E-02
P57081	391	S	tRNA (guanine-N(7)-)-methyltransferase non-catalytic subunit WDR4	WDR4	1	5.45E-13	119.85	S(1)PPPGPDGHAK	2	2.5504	24	0.369	0.268	0.912	0.869	0.988	2.596		0.826	1.174					0.324	0.777
P57740	86	S	Nuclear pore complex protein Nup107	NUP107	0.963211	6.46E-05	71.001	QPDIS(0.002)CILGT(0.035)GGKS(0.963)PR	3	0.23819	4	1.639	0.792	0.952	1.126	0.693	0.799	1.034	1.089	1.105	0.912	0.937	0.923	1.585	0.727	0.862	1.235	0.740	0.866	0.895	7.34E-01
P58107	2716	S	Epiplakin	EPPK1	0.999255	1.90E-35	156.32	QVS(0.999)AS(0.001)ELHTSGILGPETLR	2	1.0336	13	2.293	0.967	0.693	0.559	0.829	0.659	0.976	0.990	0.959	1.043	0.985	1.046	2.349	0.977	0.723	0.536	0.842	0.630	0.496	2.56E-01
P58107	2508	S	Epiplakin	EPPK1	1	2.28E-02	41.088	AEAEAGS(1)PRPDPR	2	0.41691	1	0.663		1.162		1.206	0.969	0.976	0.990	0.959	1.043	0.985	1.046	0.679		1.212		1.224	0.926	1.137	7.12E-01
P58401	336	S	Neurexin-2-beta	NRXN2	0.976631	1.47E-02	68.76	GRS(0.977)PT(0.023)LR	2	0.1652	5			1.236	1.155	0.745	0.863
P60174	58	S	Triosephosphate isomerase	TPI1	1	4.03E-163	303.34	QS(1)LGELIGTLNAAK	3	-0.40804	124	1.999	0.787	0.75	0.87	0.648	0.947	0.915	0.963	0.981	1.034	1.053	1.053	2.185	0.817	0.765	0.841	0.615	0.899	0.626	3.76E-01
P60174	249	S	Triosephosphate isomerase	TPI1	0.773746	1.08E-02	44.998	IIY(0.022)GGS(0.774)VT(0.185)GAT(0.02)CK	2	-0.70685	1	0.84		0.7	0.787	1.316	1.357	0.915	0.963	0.981	1.034	1.053	1.053	0.918		0.714	0.761	1.250	1.289	1.348	3.08E-01
P60468	17	S	Protein transport protein Sec61 subunit beta	SEC61B	0.891465	2.27E-59	192.51	PGPTPSGTNVGS(0.023)S(0.014)GRS(0.891)PS(0.071)K	2	0.77517	8			0.975	1.025			1.018	1.230	0.919	0.948	1.089	0.796			1.061	1.081			1.019
P60709	52	S	Actin, cytoplasmic 1	ACTB	0.846483	1.84E-03	64.64	DS(0.846)Y(0.154)VGDEAQSK	2	-1.607	1	1.02	0.745	1.005	0.982	1.247		0.953	0.986	0.925	0.981	1.140	1.013	1.070	0.756	1.086	1.001	1.094		1.079	6.30E-01
P60709	239	S	Actin, cytoplasmic 1	ACTB	0.876917	2.94E-06	94.45	S(0.877)Y(0.123)ELPDGQVITIGNER	2	-2.4791	4	1.297	0.73	0.876	1.095	0.805	1.197	0.953	0.986	0.925	0.981	1.140	1.013	1.361	0.740	0.947	1.116	0.706	1.182	0.985	9.53E-01
P60866	9	T	40S ribosomal protein S20	RPS20	0.803015	1.49E-02	44.44	DT(0.197)GKT(0.803)PVEPEVAIHR	3	0.80059	1	0.715	0.732		1.342	1.097	1.114	0.878	0.906	0.873	1.122	1.069	1.153	0.814	0.808		1.196	1.026	0.966	1.310	6.62E-02
P61006	185	S	Ras-related protein Rab-8A	RAB8A	1	3.22E-49	191.61	KLEGNSPQGS(1)NQGVK	2	0.79774	8	1.39	1.369	2.021	0.338	0.535	0.346	1.384	1.386	1.252	0.658	0.727	0.593	1.004	0.988	1.614	0.514	0.736	0.583	0.508	5.23E-02
P61244	11	S	Protein max	MAX	1	1.56E-32	165.17	S(1)DNDDIEVES(1)DEEQPR	2	2.6692	11	0.988	1.259	1.054	0.862	1.065	0.771	1.252	0.880	1.220	1.050	0.880	0.719	0.789	1.431	0.864	0.821	1.210	1.072	1.006	9.79E-01
P61289	24	S	Proteasome activator complex subunit 3	PSME3	0.981173	7.47E-04	58.427	IT(0.019)S(0.981)EAEDLVANFFPK	2	0.094091	2	1.335	1.104	1.189	0.871	0.669	0.833	1.086	1.003	0.960	1.054	0.925	0.972	1.229	1.101	1.239	0.826	0.723	0.857	0.674	2.99E-03
P61313	34	S	60S ribosomal protein L15	RPL15	1	2.95E-03	107.9	QLS(1)ALHR	2	2.9747	6	0.948	0.858	0.747	1.084	0.851	1.513	1.011	0.986	0.945	1.066	1.002	0.991	0.938	0.870	0.790	1.017	0.849	1.527	1.306	2.72E-01
P61978	379	S	Heterogeneous nuclear ribonucleoprotein K	HNRNPK	0.999996	5.44E-07	72.316	GS(1)YGDLGGPIITTQVTIPK	3	0.18953	15	0.775	0.817	0.812	1.317	1.186	1.094	1.001	0.984	0.995	1.014	1.002	1.004	0.774	0.830	0.816	1.299	1.184	1.090	1.476	3.62E-03
P61978	216	S	Heterogeneous nuclear ribonucleoprotein K	HNRNPK	0.99956	4.56E-20	160.63	IILDLISES(1)PIK	2	-0.041532	14	1.177	1.148	0.945	0.857	0.887	0.986	1.001	0.984	0.995	1.014	1.002	1.004	1.176	1.167	0.950	0.845	0.885	0.982	0.824	8.37E-02
P61978	284	S	Heterogeneous nuclear ribonucleoprotein K	HNRNPK	1	2.43E-07	163.66	RDYDDMS(1)PR	2	-0.55937	62	0.818	0.925	1.04	1.072	1.162	0.982	1.001	0.984	0.995	1.014	1.002	1.004	0.817	0.940	1.045	1.057	1.160	0.978	1.140	1.96E-01
P62070	186	S	Ras-related protein R-Ras2	RRAS2	0.999935	2.14E-81	229.62	KFQEQECPPS(1)PEPTR	2	0.27417	102	0.93	0.938	1.092	0.948	1.212	0.881	1.291	1.257	1.259	0.734	0.721	0.738	0.720	0.746	0.867	1.292	1.681	1.194	1.785	1.72E-02
P62136	320	T	Serine/threonine-protein phosphatase PP1-alpha catalytic subunit	PPP1CA	0.995323	2.11E-03	47.499	Y(0.001)GQFS(0.004)GLNPGGRPIT(0.995)PPR	3	0.54237	2	0.955	0.957	1.113	1.204	0.753	1.018	0.988	1.045	0.970	0.971	0.969	1.056	0.967	0.916	1.147	1.240	0.777	0.964	0.984	9.20E-01
P62140	316	T	Serine/threonine-protein phosphatase PP1-beta catalytic subunit	PPP1CB	0.941916	1.37E-08	110.74	YQYGGLNS(0.058)GRPVT(0.942)PPR	3	-0.11611	5	0.836			1.055	0.966	1.143	0.964	0.988	0.929	1.144	1.051	0.924	0.867			0.922	0.919	1.237	1.183
P62241	130	T	40S ribosomal protein S8	RPS8	1	1.99E-21	142.35	LT(1)PEEEEILNK	2	0.43346	19	0.831	0.858	0.558	1.321	1.558	0.875	0.889	0.926	0.877	1.078	1.143	1.087	0.935	0.927	0.636	1.225	1.363	0.805	1.359	1.99E-01
P62258	210	S	14-3-3 protein epsilon	YWHAE	0.994614	3.38E-36	165.19	AAFDDAIAELDTLS(0.995)EES(0.005)YK	3	-1.3702	28	0.735	0.997	0.885	1.182	1.155	1.045	0.896	0.935	0.901	1.073	1.048	1.147	0.820	1.066	0.982	1.102	1.102	0.911	1.086	4.42E-01
P62258	46	S	14-3-3 protein epsilon	YWHAE	0.999613	1.72E-02	56.548	NLLS(1)VAYK	2	0.0037152	6	1.135			0.896	1.16	0.81	0.896	0.935	0.901	1.073	1.048	1.147	1.267			0.835	1.107	0.706	0.697
P62316	12	T	Small nuclear ribonucleoprotein Sm D2	SNRPD2	0.999801	2.55E-03	80.623	SEMT(1)PEELQK	2	1.2933	1	1.283	0.764	0.906	1.171	0.925	0.952	0.924	1.049	0.952	0.969	1.107	0.999	1.389	0.728	0.952	1.208	0.836	0.953	0.977	9.20E-01
P62491	77	T	Ras-related protein Rab-11A	RAB11A	0.944162	5.54E-03	96.143	AIT(0.944)S(0.056)AYYR	2	-0.28737	2		1.748		0.587	1.033	0.633	1.284	1.536	1.464		0.395	0.320		1.138			2.615	1.978	2.018
P62750	43	S	60S ribosomal protein L23a	RPL23A	0.872433	1.51E-02	63.212	IRT(0.12)S(0.872)PT(0.008)FR	2	0.013338	1	1.326	0.852	1.099	0.938	0.785		0.892	0.954	1.088	1.036	1.054	0.975	1.487	0.893	1.010	0.905	0.745		0.730	2.97E-01
P62805	48	S	Histone H4	HIST1H4A	0.999998	1.71E-05	97.291	RIS(1)GLIYEETR	2	1.2611	7	1.42		1.01	0.818	0.928	0.824	0.991	1.150	1.061	0.925	0.900	0.972	1.433		0.952	0.884	1.031	0.848	0.772	2.55E-01
P62888	10	S	60S ribosomal protein L30	RPL30	0.999941	1.21E-03	88.948	S(1)LESINSR	2	-0.58108	6	0.786	0.791	1.455	1.032	0.976	0.961	0.917	1.004	0.973	1.047	0.956	1.103	0.857	0.788	1.495	0.986	1.021	0.871	0.916	7.23E-01
P62899	98	S	60S ribosomal protein L31	RPL31	0.999894	5.39E-15	83.318	NEDEDS(1)PNKLYTLVTYVPVTTFK	3	-2.8862	2	0.875	1.381	0.675	1.102	1.254	0.712	0.939	0.968	0.909	1.086	1.035	1.063	0.932	1.427	0.743	1.015	1.212	0.670	0.934	8.04E-01
P62995	85	S	Transformer-2 protein homolog beta	TRA2B	0.998618	6.05E-04	81.676	S(0.999)RS(0.999)Y(0.003)S(0.999)RDY(0.001)R	2	-0.04305	25	0.853	1.03	1.228	1.035	1.254	0.6	1.032	1.080	1.045	0.962	0.903	0.977	0.827	0.954	1.175	1.076	1.389	0.614	1.042	8.76E-01
P62995	83	S	Transformer-2 protein homolog beta	TRA2B	0.998913	4.65E-03	61.415	S(0.999)RS(0.999)Y(0.003)S(0.999)RDY(0.001)R	2	-0.04305	3		0.342	0.312		2.346		1.032	1.080	1.045	0.962	0.903	0.977		0.317	0.299		2.598		8.446
P62995	95	S	Transformer-2 protein homolog beta	TRA2B	1	2.63E-15	128.11	RHS(1)HS(1)HS(0.987)PMS(0.012)T(0.001)R	3	-0.17483	66	0.009	0.198	0.966	1.088	1.525	2.214	1.032	1.080	1.045	0.962	0.903	0.977	0.009	0.183	0.924	1.131	1.689	2.266	4.555	3.74E-02
P62995	102	S	Transformer-2 protein homolog beta	TRA2B	0.88596	5.08E-14	120.64	RHS(0.998)HS(0.926)HS(0.161)PMS(0.886)T(0.029)R	2	-0.33323	21		0.121	1.12	0.626	0.994	2.139	1.032	1.080	1.045	0.962	0.903	0.977		0.112	1.072	0.651	1.101	2.189	2.219	3.72E-01
P62995	97	S	Transformer-2 protein homolog beta	TRA2B	0.999983	1.49E-25	188.55	RHS(1)HS(1)HS(0.998)PMS(0.002)T(0.001)R	4	-0.12378	105	0.008	0.188	0.871	1.025	1.786	2.122	1.032	1.080	1.045	0.962	0.903	0.977	0.008	0.174	0.833	1.065	1.978	2.172	5.137	2.99E-02
P62995	2	S	Transformer-2 protein homolog beta	TRA2B	0.990944	1.07E-33	150.23	S(0.991)DS(0.009)GEQNYGER	2	-0.086517	7	1.59			0.4	0.65	1.36	1.032	1.080	1.045	0.962	0.903	0.977	1.541			0.416	0.720	1.392	0.547
P62995	14	S	Transformer-2 protein homolog beta	TRA2B	1	1.07E-33	162.77	S(0.953)DS(0.047)GEQNYGERES(1)R	2	0.45178	39	1.127	0.845	0.907	1.164	1.099	0.859	1.032	1.080	1.045	0.962	0.903	0.977	1.092	0.782	0.868	1.210	1.217	0.879	1.206	2.64E-01
P62995	87	S	Transformer-2 protein homolog beta	TRA2B	0.999917	6.05E-04	81.676	S(0.018)RS(0.982)YS(1)RDYR	3	0.15927	26	0.77	1.073	1.427	0.836	1.427	0.467	1.032	1.080	1.045	0.962	0.903	0.977	0.746	0.994	1.366	0.869	1.580	0.478	0.943	8.80E-01
P62995	99	S	Transformer-2 protein homolog beta	TRA2B	0.999996	7.70E-34	207.73	HS(0.212)HS(0.788)HS(1)PMSTR	2	-0.27211	83	0.008	0.188	0.37	1.025	2.036	2.373	1.032	1.080	1.045	0.962	0.903	0.977	0.008	0.174	0.354	1.065	2.255	2.429	10.728	1.68E-02
P62995	4	S	Transformer-2 protein homolog beta	TRA2B	0.993159	1.29E-25	184.98	S(0.007)DS(0.993)GEQNYGER	2	-0.16271	12	0.284	1.211	1.553	1.304	1.353	0.294	1.032	1.080	1.045	0.962	0.903	0.977	0.275	1.121	1.486	1.356	1.498	0.301	1.094	8.70E-01
P62995	201	T	Transformer-2 protein homolog beta	TRA2B	0.999956	8.39E-28	163.84	RPHT(1)PTPGIYMGR	3	-0.047526	137	1.034	0.798	1.119	1.11	1.115	0.824	1.032	1.080	1.045	0.962	0.903	0.977	1.002	0.739	1.071	1.154	1.235	0.843	1.150	4.21E-01
P63104	207	S	14-3-3 protein zeta/delta	YWHAZ	0.989774	6.12E-14	119.38	TAFDEAIAELDT(0.002)LS(0.99)EES(0.008)YK	2	0.72097	10	0.804	0.756	1.567	1.106	0.876	0.89	0.908	0.825	0.862	1.089	1.124	1.192	0.885	0.916	1.818	1.016	0.779	0.747	0.702	3.21E-01
P63165	2	S	Small ubiquitin-related modifier 1	SUMO1	1	7.21E-59	198.88	S(1)DQEAKPSTEDLGDKK	3	0.19872	59	1.081	0.794	0.754	1.329	0.895	1.146	1.032	1.023	1.115	1.023	0.957	0.850	1.047	0.776	0.676	1.299	0.935	1.348	1.433	1.03E-01
P63208	131	T	S-phase kinase-associated protein 1	SKP1	1	2.81E-04	144.27	GKT(1)PEEIRK	2	0.95636	21	0.797	0.638	1.099	1.018	1.475	0.972	0.975	0.968	1.019	1.117	0.990	0.932	0.817	0.659	1.079	0.911	1.490	1.043	1.348	2.37E-01
P67809	174	S	Nuclease-sensitive element-binding protein 1	YBX1	0.999998	1.86E-58	199.08	NEGS(1)ESAPEGQAQQR	2	0.2791	20	0.926	0.895	0.792	0.89	1.508	0.989	0.921	0.899	0.928	0.941	1.155	1.156	1.005	0.996	0.853	0.946	1.306	0.856	1.088	5.95E-01
P67809	165	S	Nuclease-sensitive element-binding protein 1	YBX1	0.996429	2.16E-53	188.47	NYQQNYQNS(0.996)ES(0.004)GEK	2	0.2348	14	0.906	0.862	0.794	1.089	1.158	1.191	0.921	0.899	0.928	0.941	1.155	1.156	0.984	0.959	0.856	1.157	1.003	1.030	1.140	1.02E-01
P67809	314	S	Nuclease-sensitive element-binding protein 1	YBX1	0.945549	1.24E-08	74	AADPPAENS(0.054)S(0.946)APEAEQGGAE	2	0.16343	12	1.035	0.833	1.032	1.086	1.135	0.879	0.921	0.899	0.928	0.941	1.155	1.156	1.124	0.927	1.112	1.154	0.983	0.760	0.916	5.36E-01
P67809	176	S	Nuclease-sensitive element-binding protein 1	YBX1	0.995398	1.15E-42	182.09	NEGS(0.005)ES(0.995)APEGQAQQR	2	-0.033211	7	0.725	2.124	0.583	0.64	0.927		0.921	0.899	0.928	0.941	1.155	1.156	0.787	2.363	0.628	0.680	0.803		0.589	5.22E-01
P68363	340	S	Tubulin alpha-1B chain	TUBA1B	1	6.14E-07	104.2	S(1)IQFVDWCPTGFK	2	-0.49993	6	0.959	0.987	1.219	1.114	1.081	0.639	0.903	0.937	0.907	1.084	1.091	1.078	1.062	1.053	1.344	1.028	0.991	0.593	0.755	1.69E-01
P68363	48	S	Tubulin alpha-1B chain	TUBA1B	0.96229	1.57E-09	81.157	T(0.036)IGGGDDS(0.962)FNT(0.002)FFSETGAGK	2	1.9546	13	1.276	0.87	0.914	0.938		1.003	0.903	0.937	0.907	1.084	1.091	1.078	1.413	0.928	1.008	0.865		0.930	0.804	3.45E-01
P78310	332	S	Coxsackievirus and adenovirus receptor	CXADR	0.999789	1.31E-11	145.92	TPQS(1)PTLPPAK	2	0.15375	38	0.567	0.642	0.634	1.248	1.534	1.374	0.909	0.962	0.920	1.090	1.003	1.117	0.624	0.667	0.689	1.145	1.529	1.230	1.972	5.59E-03
P78310	323	S	Coxsackievirus and adenovirus receptor	CXADR	1	3.68E-10	119.46	TQYNQVPS(1)EDFER	2	0.22783	5	0.974	1.184	0.896	0.983	1.156	0.807	0.909	0.962	0.920	1.090	1.003	1.117	1.072	1.231	0.974	0.902	1.153	0.722	0.848	3.16E-01
P78312	1144	S	Protein FAM193A	FAM193A	1	8.75E-04	74.987	LVLAES(1)PQPK	2	0.10249	5	1.031	1.008	0.923	0.918	1.119
P78316	148	S	Nucleolar protein 14	NOP14	0.999263	1.37E-172	315.93	HNDIVDS(0.001)DS(0.999)DAEDR	3	0.17369	31	1.221	0.891	0.964	0.909	1.027	0.989	1.053	1.120	1.080	0.976	0.907	0.864	1.160	0.796	0.893	0.931	1.132	1.145	1.127	4.04E-01
P78332	891	S	RNA-binding protein 6	RBM6	1	2.52E-14	163.11	KEES(1)PPPPK	2	0.092337	22	0.968	1.543	1.466	0.629	1.197	0.197	1.042	0.979	1.084	1.000	0.914	0.981	0.929	1.576	1.352	0.629	1.310	0.201	0.555	2.01E-01
P78332	1025	S	RNA-binding protein 6	RBM6	0.99934	8.05E-07	140.63	LQS(0.001)FDS(0.999)PER	2	2.6888	2	1.063	0.987	0.913	0.984	1.053		1.042	0.979	1.084	1.000	0.914	0.981	1.020	1.008	0.842	0.984	1.152		1.116	3.35E-01
P78344	395	S	Eukaryotic translation initiation factor 4 gamma 2	EIF4G2	0.999974	2.83E-03	98.933	FS(1)PTMGR	2	-0.33438	12	0.613	0.475	0.487	1.385	1.64	1.4	0.878	0.885	0.874	1.070	1.136	1.156	0.698	0.537	0.557	1.294	1.444	1.211	2.204	1.06E-03
P78344	508	T	Eukaryotic translation initiation factor 4 gamma 2	EIF4G2	0.994402	1.67E-16	137.61	T(0.006)QT(0.994)PPLGQTPQLGLK	2	0.62555	16	1.002	0.751	0.725	1.136	1.433	0.952	0.878	0.885	0.874	1.070	1.136	1.156	1.141	0.849	0.830	1.062	1.261	0.824	1.116	5.37E-01
P78345	235	S	Ribonuclease P protein subunit p38	RPP38	0.984552	2.48E-04	67.299	ELLDT(0.014)S(0.985)FEDLS(0.002)KPK	3	0.13088	5	1.196	0.886	0.882	1.295		0.742	0.891	1.089	1.040	0.973	0.976	1.033	1.342	0.814	0.848	1.331		0.718	1.023	9.46E-01
P78346	251	S	Ribonuclease P protein subunit p30	RPP30	1	2.42E-42	175.02	KPRPS(1)EGDEDCLPASK	3	-0.11071	34	1.209	1.418	1.094	0.769	0.699	0.811	0.994	1.218	1.041	0.908	0.974	0.865	1.216	1.164	1.051	0.847	0.718	0.938	0.729	1.82E-02
P78347	412	S	General transcription factor II-I	GTF2I	0.990634	2.58E-04	101.72	RPS(0.991)T(0.009)YGIPR	2	-0.44731	25	0.594	0.695	0.633	1.973	1.121	0.985	0.996	0.981	1.043	0.966	0.996	1.017	0.596	0.708	0.607	2.042	1.126	0.969	2.164	9.25E-02
P78347	784	S	General transcription factor II-I	GTF2I	0.976902	1.57E-03	87.216	RPS(0.977)T(0.023)FGIPR	2	0.59483	7	0.598	1.029	0.968	0.716	1.689		0.996	0.981	1.043	0.966	0.996	1.017	0.600	1.049	0.928	0.741	1.696		1.418	4.31E-01
P78347	210	S	General transcription factor II-I	GTF2I	0.999636	5.96E-08	110.35	SILS(1)PGGSCGPIK	2	0.26099	12	1.153	0.684	0.915	1.102	1.114	1.032	0.996	0.981	1.043	0.966	0.996	1.017	1.158	0.697	0.877	1.141	1.118	1.015	1.198	2.65E-01
P78347	558	T	General transcription factor II-I	GTF2I	0.862369	2.28E-02	49.188	T(0.138)NT(0.862)PVKEDWNVR	3	-0.25973	1	0.826		1.09		1.302	0.782	0.996	0.981	1.043	0.966	0.996	1.017	0.829		1.045		1.307	0.769	1.108	7.61E-01
P78347	16	S	General transcription factor II-I	GTF2I	0.816841	1.66E-14	122.34	AQVAMSTLPVEDEES(0.817)S(0.131)ES(0.052)R	3	0.12857	9	0.76	0.67	0.25	1.268	1.227	1.825	0.996	0.981	1.043	0.966	0.996	1.017	0.763	0.683	0.240	1.313	1.232	1.794	2.574	2.10E-02
P78362	497	S	SRSF protein kinase 2	SRPK2	0.76223	3.82E-05	85.493	TVS(0.001)AS(0.116)S(0.762)T(0.121)GDLPK	2	0.74441	10	0.803		0.729	0.982	1.234	1.253	0.894	0.746	0.762	1.091	1.288	1.220	0.898		0.957	0.900	0.958	1.027	1.037	5.58E-01
P78371	3	S	T-complex protein 1 subunit beta	CCT2	0.979408	3.28E-04	68.262	AS(0.979)LS(0.021)LAPVNIFK	2	0.42221	4	0.637	0.585	0.671	1.76	1.079	1.268	0.958	0.912	0.943	1.068	1.048	1.071	0.665	0.641	0.712	1.648	1.030	1.184	1.914	3.03E-02
P78527	893	S	DNA-dependent protein kinase catalytic subunit	PRKDC	1	6.08E-05	112.73	RLS(1)FAVPFR	2	-0.073575	6	2.199	0.971	0.84	0.631	0.79	0.57	1.063	1.075	1.070	0.926	0.930	0.936	2.069	0.903	0.785	0.681	0.849	0.609	0.570	2.65E-01
P78527	3205	S	DNA-dependent protein kinase catalytic subunit	PRKDC	0.998959	3.24E-09	75.215	LT(0.001)PLPEDNS(0.999)MNVDQDGDPSDR	3	-0.058715	14	0.507	0.145	0.708	1.643	1.774	1.223	1.063	1.075	1.070	0.926	0.930	0.936	0.477	0.135	0.662	1.774	1.908	1.307	3.917	6.58E-03
P78536	791	S	Disintegrin and metalloproteinase domain-containing protein 17	ADAM17	1	3.71E-77	255.85	S(1)FEDLTDHPVTR	2	1.1409	17	0.49	0.355	0.535	1.534	1.732	1.354	1.099	0.992	0.959	0.975	1.018	0.956	0.446	0.358	0.558	1.573	1.701	1.416	3.445	3.86E-04
P80723	36	T	Brain acid soluble protein 1	BASP1	0.999901	5.24E-11	112.88	KAEGAATEEEGT(1)PK	2	0.95131	4		0.888	0.813	1.059	0.892	1.348	1.240	1.307	1.117	0.827	0.681	0.827		0.679	0.728	1.281	1.310	1.630	1.999	1.69E-02
P80723	164	S	Brain acid soluble protein 1	BASP1	0.99999	6.77E-17	113.13	S(1)DGAPASDSKPGSSEAAPSSK	2	-1.1909	12	0.947	0.951	0.837	0.899	1.123	1.243	1.240	1.307	1.117	0.827	0.681	0.827	0.764	0.728	0.749	1.087	1.649	1.503	1.892	1.68E-02
P82094	401	T	TATA element modulatory factor	TMF1	0.994864	2.91E-19	95.205	S(0.995)AT(0.995)PVNCEQPDILVS(0.004)S(0.004)T(0.002)PINEGQTVLDK	3	1.6434	3	0.336	0.196	3.248		0.219		1.104	1.069	1.093	0.890	0.882	0.961	0.304	0.183	2.972		0.248		0.215
P82094	72	S	TATA element modulatory factor	TMF1	0.996248	3.07E-04	69.111	SNT(0.001)EPQS(0.996)PPIAS(0.002)PK	2	0.039617	4			0.798	1.13	1.072		1.104	1.069	1.093	0.890	0.882	0.961			0.730	1.270	1.215		1.702
P82094	399	S	TATA element modulatory factor	TMF1	0.994666	2.91E-19	95.205	S(0.995)AT(0.995)PVNCEQPDILVS(0.004)S(0.004)T(0.002)PINEGQTVLDK	3	1.6434	8	1.318	1.096	0.946	0.902	0.86	0.878	1.104	1.069	1.093	0.890	0.882	0.961	1.194	1.025	0.866	1.013	0.975	0.914	0.941	5.73E-01
P82909	61	S	28S ribosomal protein S36, mitochondrial	MRPS36	0.9999	4.42E-05	53.964	S(1)PDLLMYQGPPDTAEIIK	3	0.69077	5	0.74	0.73	0.693		1.224	1.613	0.872	1.056	1.040	1.067	0.902	1.062	0.849	0.691	0.666		1.357	1.519	1.955	5.15E-03
P83369	21	S	U7 snRNA-associated Sm-like protein LSm11	LSM11	0.999994	2.12E-07	108.94	S(0.02)AGAGS(0.98)PARPPS(1)PR	2	-2.0135	16	1.272	0.974	0.99	0.873	0.84	1.051
P83369	15	S	U7 snRNA-associated Sm-like protein LSm11	LSM11	0.997268	2.57E-04	76.158	S(0.003)AGAGS(0.997)PARPPS(1)PR	2	-1.8264	8	1.167	0.962	1.565	0.814	0.716	0.776
P84022	8	T	Mothers against decapentaplegic homolog 3	SMAD3	0.999863	5.00E-04	71.279	SSILPFT(1)PPIVK	2	0.14752	7	0.835	0.871	0.889	1.462	0.828	1.115	1.015	0.919	0.998	0.995	0.979	1.095	0.823	0.948	0.891	1.469	0.846	1.018	1.253	3.02E-01
P84095	180	T	Rho-related GTP-binding protein RhoG	RHOG	1	1.78E-03	81.676	AVLNPT(1)PIKR	2	-0.264	12	1.103	1.105	0.901	0.948	1.128	0.814	1.315	1.335	1.253	0.725	0.648	0.725	0.839	0.828	0.719	1.308	1.741	1.123	1.748	3.35E-02
P84098	189	S	60S ribosomal protein L19	RPL19	0.999898	4.24E-09	135.13	TLS(1)KEEETKK	2	-0.50145	2	1.135	1.465	1.034	0.833	0.568	0.965	1.045	1.030	1.137	0.911	0.927	0.950	1.086	1.422	0.909	0.914	0.613	1.016	0.744	2.05E-01
P84103	152	S	Serine/arginine-rich splicing factor 3	SRSF3	1	2.49E-03	78.469	NHKPS(1)RS(1)FS(1)R	2	-0.022389	12	2.229	0.573	0.556	0.984	1.121	0.537	0.988	1.025	0.957	0.975	0.981	1.073	2.256	0.559	0.581	1.009	1.143	0.500	0.781	6.98E-01
P84103	138	S	Serine/arginine-rich splicing factor 3	SRSF3	1	7.27E-04	96.113	ERS(1)LS(1)RER	2	-0.43969	13	1.126	1.582	1.015	0.813	0.641	0.824	0.988	1.025	0.957	0.975	0.981	1.073	1.140	1.543	1.061	0.834	0.653	0.768	0.602	3.52E-02
P84103	148	S	Serine/arginine-rich splicing factor 3	SRSF3	1	5.62E-04	85.478	NHKPS(1)RS(1)FS(1)R	2	-0.022389	20	1.294	1.42	0.636	0.724	1.107	0.818	0.988	1.025	0.957	0.975	0.981	1.073	1.310	1.385	0.665	0.743	1.128	0.762	0.784	4.06E-01
P84103	140	S	Serine/arginine-rich splicing factor 3	SRSF3	1	7.27E-04	96.113	ERS(1)LS(1)RER	2	-0.43969	13	1.126	1.582	1.015	0.813	0.641	0.824	0.988	1.025	0.957	0.975	0.981	1.073	1.140	1.543	1.061	0.834	0.653	0.768	0.602	3.52E-02
P84103	150	S	Serine/arginine-rich splicing factor 3	SRSF3	1	5.62E-04	85.478	NHKPS(1)RS(1)FS(1)R	2	-0.022389	17	1.294	1.42	0.636	0.724	1.107	0.818	0.988	1.025	0.957	0.975	0.981	1.073	1.310	1.385	0.665	0.743	1.128	0.762	0.784	4.06E-01
P84103	5	S	Serine/arginine-rich splicing factor 3	SRSF3	1	1.34E-03	67.102	MHRDS(1)CPLDCK	3	0.084962	4		0.877	0.718		1.351	1.055	0.988	1.025	0.957	0.975	0.981	1.073		0.856	0.750		1.377	0.983	1.470	2.05E-01
P85037	428	S	Forkhead box protein K1	FOXK1	0.997947	1.88E-04	69.765	S(0.008)APAS(0.913)PT(0.081)HPGLMS(0.998)PR	2	0.16933	5	0.981		0.747	0.99		1.281	0.950	0.971	1.097	0.980	1.031	0.971	1.033		0.681	1.010		1.319	1.359	3.19E-01
P85037	213	S	Forkhead box protein K1	FOXK1	1	2.03E-19	130.83	EEAPAS(1)PLRPLYPQIS(1)PLK	2	0.16881	35	1.3	1.024	0.505	1.074	1.169	0.927	0.950	0.971	1.097	0.980	1.031	0.971	1.368	1.055	0.460	1.096	1.134	0.955	1.104	7.31E-01
P85037	441	S	Forkhead box protein K1	FOXK1	0.9999	8.18E-06	94.339	SGGLQTPECLS(1)R	2	-0.045027	6	1.07	0.69	0.636	1.37	1.289	0.946	0.950	0.971	1.097	0.980	1.031	0.971	1.126	0.711	0.580	1.398	1.250	0.974	1.499	1.23E-01
P85037	420	S	Forkhead box protein K1	FOXK1	0.996142	8.22E-23	145.79	S(0.002)APAS(0.996)PT(0.002)HPGLMSPR	2	0.40227	17	1.372	0.691	0.916	1.1		0.92	0.950	0.971	1.097	0.980	1.031	0.971	1.444	0.712	0.835	1.122		0.947	1.038	9.07E-01
P85037	243	S	Forkhead box protein K1	FOXK1	0.98857	3.69E-23	122.34	SMVSPVPS(0.989)PT(0.011)GT(0.001)ISVPNSCPASPR	2	1.354	11	1.092	0.972	1.101		0.835		0.950	0.971	1.097	0.980	1.031	0.971	1.149	1.001	1.004		0.810		0.770
P85037	445	S	Forkhead box protein K1	FOXK1	1	3.17E-15	130.87	EGS(1)PIPHDPEFGSK	2	1.4765	18	1.104	1.031	0.646	1.001	1.276	0.942	0.950	0.971	1.097	0.980	1.031	0.971	1.162	1.062	0.589	1.021	1.238	0.970	1.148	5.16E-01
P85037	416	S	Forkhead box protein K1	FOXK1	0.850609	1.16E-10	118.08	S(0.851)APAS(0.143)PT(0.006)HPGLMSPR	2	0.15885	5	2.401				0.319	0.28	0.950	0.971	1.097	0.980	1.031	0.971	2.527				0.309	0.288	0.118
P85037	101	S	Forkhead box protein K1	FOXK1	1	7.71E-04	81.335	QS(1)PGPALAR	2	2.5073	2	1.196	0.923	1.051	0.928		0.903	0.950	0.971	1.097	0.980	1.031	0.971	1.259	0.951	0.958	0.947		0.930	0.889	4.37E-01
P85037	257	S	Forkhead box protein K1	FOXK1	0.974428	2.99E-07	62.02	S(0.004)MVS(0.034)PVPS(0.251)PT(0.303)GT(0.368)IS(0.048)VPNS(0.017)CPAS(0.974)PR	3	-0.5975	8	0.911	0.8	0.965	1.324			0.950	0.971	1.097	0.980	1.031	0.971	0.959	0.824	0.880	1.351			1.522
P85037	223	S	Forkhead box protein K1	FOXK1	1	2.20E-14	122.34	EEAPAS(1)PLRPLYPQIS(1)PLK	3	0.36368	27	1.21	0.924	1.077	0.91	0.964	0.915	0.950	0.971	1.097	0.980	1.031	0.971	1.274	0.952	0.982	0.929	0.935	0.942	0.875	2.63E-01
P86791	266	S	Vacuolar fusion protein CCZ1 homolog	CCZ1	1	1.60E-22	150.91	HIEPELAGRDS(1)PIR	3	-0.076471	18	1.389	0.951	0.631	0.807	1.355	0.867	0.756	1.115	0.878	0.985	1.208	1.057	1.837	0.853	0.719	0.819	1.122	0.820	0.810	5.88E-01
P98175	718	S	RNA-binding protein 10	RBM10	0.99698	2.08E-11	145.6	LAS(0.997)DDRPS(0.003)PPR	3	0.086179	44	1.065	0.756	0.79	1.24	0.982	1.167	1.099	1.007	1.045	0.943	0.954	0.953	0.969	0.751	0.756	1.315	1.029	1.225	1.442	3.03E-02
P98175	733	S	RNA-binding protein 10	RBM10	0.978792	8.34E-26	142.45	GLVAAY(0.02)S(0.979)GES(0.399)DS(0.602)EEEQER	2	0.60159	7	0.799	0.659	0.723	1.516	1.465	0.839	1.099	1.007	1.045	0.943	0.954	0.953	0.727	0.654	0.692	1.608	1.536	0.880	1.941	4.89E-02
P98175	723	S	RNA-binding protein 10	RBM10	0.995376	3.20E-14	155.64	LAS(0.005)DDRPS(0.995)PPR	2	0.022375	29	1.256	0.927	0.788		0.886	1.143	1.099	1.007	1.045	0.943	0.954	0.953	1.143	0.921	0.754		0.929	1.199	1.133	5.31E-01
P98175	738	S	RNA-binding protein 10	RBM10	0.999663	1.49E-45	169.51	GLVAAY(0.323)S(0.678)GES(0.999)DS(1)EEEQER	2	0.66679	33	0.879	1.076	0.978	0.929	1.037	1.101	1.099	1.007	1.045	0.943	0.954	0.953	0.800	1.069	0.936	0.985	1.087	1.155	1.151	2.00E-01
P98175	797	S	RNA-binding protein 10	RBM10	1	1.84E-22	153.21	AHLS(1)ENELEALEK	2	0.64383	7	1.59	0.812	0.835	0.669	1.174	0.92	1.099	1.007	1.045	0.943	0.954	0.953	1.447	0.806	0.799	0.709	1.231	0.965	0.952	8.61E-01
P98175	89	S	RNA-binding protein 10	RBM10	0.999567	5.23E-22	149.22	HRHS(1)PTGPPGFPR	3	-0.18082	170	0.653	0.784	0.811	1.684	0.882	1.185	1.099	1.007	1.045	0.943	0.954	0.953	0.594	0.779	0.776	1.786	0.925	1.243	1.840	8.06E-02
P98175	736	S	RNA-binding protein 10	RBM10	0.998745	5.42E-19	135.98	GLVAAY(0.323)S(0.678)GES(0.999)DS(1)EEEQER	2	0.66679	8		0.968		1.073	0.947	1.013	1.099	1.007	1.045	0.943	0.954	0.953		0.961		1.138	0.993	1.063	1.107
Q00341	31	S	Vigilin	HDLBP	0.995434	1.69E-06	95.414	VAT(0.002)LNS(0.995)EEES(0.002)DPPTYK	2	1.3867	9	1.08	0.679	0.885	1.384	0.926	1.047	0.993	1.013	0.972	1.014	1.020	0.987	1.088	0.670	0.910	1.365	0.908	1.061	1.249	2.87E-01
Q00536	119	S	Cyclin-dependent kinase 16	CDK16	1	6.88E-03	71.176	RLS(1)LPADIR	2	0.76182	4	1.63	1.147	0.833	0.641		0.75
Q00536	153	S	Cyclin-dependent kinase 16	CDK16	0.934947	2.09E-03	72.615	RVS(0.935)LS(0.065)EIGFGK	2	0.98913	2		0.99	1.298	0.965	0.703	1.043
Q00536	110	S	Cyclin-dependent kinase 16	CDK16	0.770292	3.60E-06	108.68	KIS(0.77)T(0.23)EDINKR	3	-0.76705	2	0.805		0.971	0.998	1.226
Q00587	350	S	Cdc42 effector protein 1	CDC42EP1	0.999469	1.34E-03	66.215	AS(0.999)WES(0.001)LDEEWR	2	-0.54196	2	1.147	1.253	0.913	0.935	0.993	0.759	1.313	1.386	1.328	0.721	0.636	0.616	0.874	0.904	0.688	1.297	1.561	1.232	1.659	1.11E-02
Q00610	394	T	Clathrin heavy chain 1	CLTC	0.96367	7.93E-04	81.709	GILRT(0.964)PDT(0.036)IR	3	0.34935	11	1.278	1.205	0.908	0.772	1.128	0.709	1.045	1.037	1.040	0.939	0.969	0.970	1.223	1.162	0.873	0.822	1.164	0.731	0.834	3.50E-01
Q00613	363	S	Heat shock factor protein 1	HSF1	0.998248	5.97E-14	109.91	GHTDT(0.002)EGRPPS(0.998)PPPTSTPEK	3	-0.1019	4	1.259	0.953	1.19	0.975		0.622						1.000						0.622
Q00613	303	S	Heat shock factor protein 1	HSF1	1	3.74E-05	90.453	VKEEPPS(1)PPQS(1)PR	2	1.3807	10	0.534	1.423	1.256	1.423	0.777	0.587						1.000						0.587
Q00613	307	S	Heat shock factor protein 1	HSF1	1	3.74E-05	90.453	VKEEPPS(1)PPQS(1)PR	2	1.3807	3		1.01	0.985	1.005								1.000
Q00839	59	S	Heterogeneous nuclear ribonucleoprotein U	HNRNPU	0.999962	3.00E-16	75.536	LQAALDDEEAGGRPAMEPGNGS(1)LDLGGDSAGR	3	0.013857	11	0.926		0.645	1.096	1.243	1.09	1.055	1.039	0.953	0.997	0.967	0.989	0.878		0.677	1.099	1.285	1.102	1.495	3.88E-02
Q00839	271	S	Heterogeneous nuclear ribonucleoprotein U	HNRNPU	0.998879	2.00E-11	64.767	AKS(0.999)PQPPVEEEDEHFDDT(0.001)VVCLDTYNCDLHFK	5	-0.369	69	1.118	0.664	1.027	1.104	1.087		1.055	1.039	0.953	0.997	0.967	0.989	1.060	0.639	1.078	1.107	1.124		1.206	3.80E-01
Q00839	4	S	Heterogeneous nuclear ribonucleoprotein U	HNRNPU	0.956677	2.58E-03	69.275	S(0.013)S(0.03)S(0.957)PVNVK	2	0.27324	18	0.839	1.065	1.071	1.02		1.005	1.055	1.039	0.953	0.997	0.967	0.989	0.795	1.025	1.124	1.023		1.016	1.039	7.81E-01
Q01082	2165	S	Spectrin beta chain, non-erythrocytic 1	SPTBN1	0.898704	6.38E-07	98.642	ES(0.101)S(0.899)PIPS(0.997)PT(0.003)SDR	2	-0.22246	34	0.613	1.163	1.189	0.784	0.839	1.412	0.985	0.983	1.012	1.009	0.991	1.020	0.622	1.183	1.175	0.777	0.847	1.384	1.009	9.74E-01
Q01082	2164	S	Spectrin beta chain, non-erythrocytic 1	SPTBN1	0.817374	3.79E-08	108.94	ES(0.817)S(0.184)PIPS(0.954)PT(0.036)S(0.009)DRK	2	-0.45885	37	0.692	1.199	0.833	0.995	1.564	0.718	0.985	0.983	1.012	1.009	0.991	1.020	0.703	1.220	0.823	0.986	1.578	0.704	1.190	5.94E-01
Q01082	2159	T	Spectrin beta chain, non-erythrocytic 1	SPTBN1	0.893921	1.86E-05	84.508	T(0.894)S(0.91)S(0.892)KES(0.187)S(0.117)PIPSPTSDR	2	-0.43252	23	1.313	1.097	1.306	0.951	0.628	0.703	0.985	0.983	1.012	1.009	0.991	1.020	1.333	1.116	1.291	0.943	0.634	0.689	0.606	1.33E-02
Q01082	2320	T	Spectrin beta chain, non-erythrocytic 1	SPTBN1	0.982177	2.58E-41	178.52	HEVSASTQS(0.017)T(0.982)PASSR	2	0.31457	4	0.629				1.471	0.9	0.985	0.983	1.012	1.009	0.991	1.020	0.639				1.484	0.882	1.853
Q01082	2138	S	Spectrin beta chain, non-erythrocytic 1	SPTBN1	1	1.78E-18	133.7	GEQVSQNGLPAEQGS(1)PR	2	-0.82076	6	1.399	0.802	1.065	0.93	1.044	0.761	0.985	0.983	1.012	1.009	0.991	1.020	1.420	0.816	1.052	0.922	1.053	0.746	0.827	3.92E-01
Q01082	2169	S	Spectrin beta chain, non-erythrocytic 1	SPTBN1	0.997175	4.38E-12	114.95	ES(0.204)S(0.797)PIPS(0.997)PT(0.002)S(0.001)DR	2	-0.039021	94	1.043	0.909	0.984	1.082	1.054	0.929	0.985	0.983	1.012	1.009	0.991	1.020	1.059	0.925	0.972	1.072	1.064	0.911	1.031	6.68E-01
Q01082	2161	S	Spectrin beta chain, non-erythrocytic 1	SPTBN1	0.931174	4.38E-12	120.71	T(0.034)S(0.034)S(0.931)KESSPIPSPTSDR	2	1.0994	44	1.405	0.296	1.222	1.083	0.861	1.132	0.985	0.983	1.012	1.009	0.991	1.020	1.426	0.301	1.208	1.073	0.869	1.110	1.040	9.17E-01
Q01082	2102	S	Spectrin beta chain, non-erythrocytic 1	SPTBN1	0.999999	2.76E-32	202.58	RPPS(1)PEPSTK	2	0.42689	51	1.026	0.758	0.786	0.99	1.222	1.218	0.985	0.983	1.012	1.009	0.991	1.020	1.042	0.771	0.777	0.981	1.233	1.194	1.316	8.30E-02
Q01082	2160	S	Spectrin beta chain, non-erythrocytic 1	SPTBN1	0.910022	4.38E-12	89.462	T(0.894)S(0.91)S(0.892)KES(0.187)S(0.117)PIPSPTSDR	2	-0.43252	26	1.313	1.097	1.306	0.951	0.628	0.703	0.985	0.983	1.012	1.009	0.991	1.020	1.333	1.116	1.291	0.943	0.634	0.689	0.606	1.33E-02
Q01082	2341	S	Spectrin beta chain, non-erythrocytic 1	SPTBN1	0.890065	3.19E-50	175.71	AQTLPTSVVTITS(0.002)ES(0.108)S(0.89)PGK	3	0.43853	16	0.991		0.771	1.16		1.078	0.985	0.983	1.012	1.009	0.991	1.020	1.006		0.762	1.150		1.057	1.248	2.35E-01
Q01105	7	S	Protein SET	SET	1	9.61E-20	193.94	RQS(1)PLPPQKK	3	0.34499	35	1.084	0.947	1.134	0.948	1.163	0.723	0.943	0.848	0.862	1.151	1.086	1.111	1.150	1.117	1.316	0.824	1.071	0.651	0.711	6.47E-02
Q01130	25	T	Serine/arginine-rich splicing factor 2	SRSF2	0.986287	3.31E-02	115.46	T(0.986)S(0.014)PDTLR	2	-0.16304	10	0.688	0.839			1.038	1.435	0.787	0.767	0.746	1.126	1.293	1.282	0.874	1.094			0.803	1.119	0.977	9.16E-01
Q01130	191	S	Serine/arginine-rich splicing factor 2	SRSF2	1	4.92E-07	148.85	S(1)RS(1)PPPVSK	2	-1.2123	33	0.454	0.818	0.671	1.33	1.48	1.247	0.787	0.767	0.746	1.126	1.293	1.282	0.577	1.066	0.899	1.181	1.145	0.973	1.297	1.85E-01
Q01130	189	S	Serine/arginine-rich splicing factor 2	SRSF2	1	4.92E-07	148.85	S(1)RS(1)PPPVSK	2	-1.2123	25	0.837	0.759	0.381	1.249	1.572	1.202	0.787	0.767	0.746	1.126	1.293	1.282	1.064	0.990	0.511	1.109	1.216	0.938	1.273	2.90E-01
Q01130	206	S	Serine/arginine-rich splicing factor 2	SRSF2	0.999998	1.85E-07	99.873	S(1)KS(1)PPKSPEEEGAVSS	2	-0.039864	35	1.086	0.757	0.959	0.977	1.471	0.75	0.787	0.767	0.746	1.126	1.293	1.282	1.380	0.987	1.286	0.868	1.138	0.585	0.709	1.49E-01
Q01130	26	S	Serine/arginine-rich splicing factor 2	SRSF2	0.905165	2.52E-02	123.98	T(0.095)S(0.905)PDTLR	2	0.21682	10		1.075	0.932	0.737	1.165	1.092	0.787	0.767	0.746	1.126	1.293	1.282		1.402	1.249	0.655	0.901	0.852	0.605	1.88E-02
Q01130	208	S	Serine/arginine-rich splicing factor 2	SRSF2	0.999994	1.85E-07	99.873	S(1)KS(1)PPKSPEEEGAVSS	2	-0.039864	90	1.051	0.875	0.695	1.205	1.004	1.17	0.787	0.767	0.746	1.126	1.293	1.282	1.335	1.141	0.932	1.070	0.776	0.913	0.810	2.08E-01
Q01130	187	S	Serine/arginine-rich splicing factor 2	SRSF2	0.999965	3.24E-03	58.079	S(1)RS(1)RS(1)PPPVSK	3	-0.31933	9		0.455	1.003	1.01	1.412	1.12	0.787	0.767	0.746	1.126	1.293	1.282		0.593	1.345	0.897	1.092	0.874	0.985	9.63E-01
Q01167	398	S	Forkhead box protein K2	FOXK2	1	4.93E-05	63.06	EGS(1)PAPLEPEPGAAQPK	2	-0.21443	7	1.182	0.807	0.885	0.867	0.988	1.272	1.209		0.975		1.018	0.798	0.978		0.908		0.971	1.594	1.360	3.92E-01
Q01167	373	S	Forkhead box protein K2	FOXK2	0.963981	6.51E-13	76.937	S(0.017)APAS(0.964)PNHAGVLS(0.017)AHS(0.002)S(0.001)GAQTPESLSR	3	-1.0618	3	1.467		0.605	1.292	0.692	0.944	1.209		0.975		1.018	0.798	1.213		0.621		0.680	1.183	1.016	9.74E-01
Q01167	30	S	Forkhead box protein K2	FOXK2	0.998588	2.39E-36	97.026	AAAAAALSGAGT(0.001)PPAGGGAGGGGAGGGGS(0.999)PPGGWAVAR	3	-0.25131	13	0.395	1.12	0.987	1.263	1.329	0.907	1.209		0.975		1.018	0.798	0.327		1.012		1.306	1.137	1.824	2.59E-01
Q01167	389	T	Forkhead box protein K2	FOXK2	0.870158	6.87E-09	62.434	S(0.121)APAS(0.87)PNHAGVLS(0.009)AHS(0.006)S(0.015)GAQT(0.87)PES(0.06)LS(0.05)R	3	0.3281	2	0.953			1.047			1.209		0.975		1.018	0.798	0.788
Q01196	21	S	Runt-related transcription factor 1	RUNX1	0.99999	2.49E-13	105.91	RFTPPSTALS(1)PGK	2	0.17035	21	1.277	1.11	1.16	0.284	1.206	0.963	0.896	0.938	1.137	0.945	1.131	0.953	1.425	1.183	1.020	0.301	1.066	1.010	0.655	2.01E-01
Q01196	14	T	Runt-related transcription factor 1	RUNX1	0.999847	2.49E-13	105.91	RFT(1)PPS(0.013)T(0.071)ALS(0.916)PGK	2	0.51649	9	0.473	1.405	0.527	1.451	1.127	1.017	0.896	0.938	1.137	0.945	1.131	0.953	0.528	1.498	0.464	1.535	0.996	1.067	1.446	3.80E-01
Q01484	3792	S	Ankyrin-2	ANK2	0.999991	4.37E-02	66.758	AMIVPS(1)S(0.998)PS(0.002)K	1	-0.62583	1	0.851	1.297	1.138	0.588	1.419	0.706
Q01484	3793	S	Ankyrin-2	ANK2	0.99762	4.37E-02	66.758	AMIVPS(1)S(0.998)PS(0.002)K	1	-0.62583	1	0.851	1.297	1.138	0.588	1.419	0.706
Q01518	308	S	Adenylyl cyclase-associated protein 1	CAP1	0.925474	6.79E-05	83.948	PFS(0.001)APKPQT(0.077)S(0.925)PS(0.996)PK	2	0.37449	5	1.475	1.093	1.317	0.946	0.707	0.462	0.927	0.924	0.967	1.066	1.091	1.024	1.591	1.183	1.362	0.887	0.648	0.451	0.480	1.43E-02
Q01518	310	S	Adenylyl cyclase-associated protein 1	CAP1	0.996108	6.79E-05	83.948	PFS(0.001)APKPQT(0.077)S(0.925)PS(0.996)PK	2	0.37449	5	1.475	1.093	1.317	0.946	0.707	0.462	0.927	0.924	0.967	1.066	1.091	1.024	1.591	1.183	1.362	0.887	0.648	0.451	0.480	1.43E-02
Q01581	495	S	Hydroxymethylglutaryl-CoA synthase, cytoplasmic	HMGCS1	0.995939	4.24E-46	138.21	RPTPNDDTLDEGVGLVHSNIAT(0.004)EHIPS(0.996)PAK	4	-1.2134	7	1.242	0.926		0.964	1.057	0.81	0.962	0.891	1.073	1.086	0.991	0.998	1.291	1.039		0.888	1.067	0.812	0.791	1.70E-01
Q01650	35	S	Large neutral amino acids transporter small subunit 1	SLC7A5	0.99967	2.77E-35	165.19	SADGS(1)APAGEGEGVTLQR	2	-0.4474	24	0.877	1.158	0.991	0.869	1.215	0.891	0.977	0.957	1.073	1.004	1.033	0.955	0.898	1.210	0.924	0.866	1.176	0.933	0.981	8.98E-01
Q01650	31	S	Large neutral amino acids transporter small subunit 1	SLC7A5	0.999755	7.67E-20	139.5	S(1)ADGSAPAGEGEGVTLQR	2	0.32464	12	0.825	0.965	0.688	1.107	1.301	1.114	0.977	0.957	1.073	1.004	1.033	0.955	0.844	1.008	0.641	1.103	1.259	1.166	1.415	4.06E-02
Q01664	124	S	Transcription factor AP-4	TFAP4	0.931578	1.38E-11	145.49	FIQELSGS(0.068)S(0.932)PK	2	0.34908	12	1.089	1.232	1.103		0.84	0.736	1.239	1.208	1.384	0.705	0.531	0.934	0.879	1.020	0.797		1.582	0.788	1.319	4.20E-01
Q01804	1006	S	OTU domain-containing protein 4	OTUD4	0.999905	2.33E-16	134.32	TAADVVS(1)PGANSVDSR	2	0.37779	4	0.93	0.744	1.019	1.395		0.913				1.000						1.395
Q01831	94	S	DNA repair protein complementing XP-C cells	XPC	1	1.36E-10	123	VIKDEALS(1)DGDDLR	3	-0.70292	15	0.861	0.898	0.578	1.086	1.328	1.249	1.001	0.903	1.283	1.077	0.885	0.852	0.860	0.994	0.451	1.008	1.501	1.466	1.724	7.10E-02
Q01954	989	S	Zinc finger protein basonuclin-1	BNC1	0.894261	6.96E-08	120.55	SLAS(0.007)S(0.894)PS(0.099)HLQ	2	0.0091485	11	0.963	1.777	1.196	0.638	0.748	0.679	0.976	1.068	1.095	0.992	1.045	0.823	0.987	1.664	1.092	0.643	0.716	0.825	0.584	7.47E-02
Q01954	338	S	Zinc finger protein basonuclin-1	BNC1	0.999494	1.28E-02	60.547	T(0.001)QLS(0.999)PEAK	2	0.22828	2	1.084	1.166	1.166	0.572	1.013		0.976	1.068	1.095	0.992	1.045	0.823	1.111	1.092	1.065	0.577	0.969		0.710	1.21E-01
Q01954	780	S	Zinc finger protein basonuclin-1	BNC1	1	6.91E-16	127.32	ALS(1)QEALESSEDHFR	3	0.20008	6		0.38	0.342	1.387	1.532	1.359	0.976	1.068	1.095	0.992	1.045	0.823		0.356	0.312	1.398	1.466	1.651	4.506	1.30E-03
Q01954	624	T	Zinc finger protein basonuclin-1	BNC1	0.974935	1.31E-10	77.51	ESVIES(0.008)S(0.008)GAIS(0.006)QT(0.975)PEQAT(0.002)HNSER	3	-0.12124	1	1.541	0.877	0.863	0.794	1.062	0.863	0.976	1.068	1.095	0.992	1.045	0.823	1.579	0.821	0.788	0.800	1.016	1.049	0.899	7.10E-01
Q01970	934	S	1-phosphatidylinositol 4,5-bisphosphate phosphodiesterase beta-3	PLCB3	0.924269	3.59E-17	116.55	RPPGPTTSPASTSLS(0.076)S(0.924)PGQR	3	0.61783	6	1.149	1.028	0.995	0.583	1.509	0.736	0.895	0.839	0.853	1.144	1.192	1.077	1.284	1.225	1.166	0.510	1.266	0.683	0.669	1.54E-01
Q02040	537	S	A-kinase anchor protein 17A	AKAP17A	1	1.97E-06	109.51	VVPEDGS(1)PEKR	3	-1.5144	14	0.881	1.09	1.208	0.765	1.062	0.993	1.041	0.980	1.055	1.052	0.950	0.922	0.846	1.112	1.145	0.727	1.118	1.077	0.942	7.18E-01
Q02156	710	T	Protein kinase C epsilon type	PRKCE	1	2.16E-04	87.157	EEPVLT(1)LVDEAIVK	2	1.2382	5	1.659	0.876	0.666	0.794		1.005
Q02241	670	S	Kinesin-like protein KIF23	KIF23	0.999994	1.05E-03	77.062	TEKPERPS(1)R	3	0.018012	3			1.302	0.887	0.936	0.876	1.072	0.961	1.008	1.009	0.986	0.964			1.292	0.879	0.949	0.909	0.706
Q02241	867	S	Kinesin-like protein KIF23	KIF23	0.999758	3.02E-09	100.76	YMLTHQELAS(1)DGEIETK	3	-2.0143	11	0.929	0.944	0.898	1.092	1.154	0.983	1.072	0.961	1.008	1.009	0.986	0.964	0.867	0.982	0.891	1.082	1.170	1.020	1.194	3.41E-02
Q02447	73	S	Transcription factor Sp3	SP3	1	5.56E-48	113.32	IGPPS(1)PGDDEEEAAAAAGAPAAAGATGDLASAQLGGAPNR	3	1.0083	15	1.027	1.023	1.044	0.889	1.084	0.934	1.236	1.174	1.200	0.799	0.696	0.895	0.831	0.871	0.870	1.113	1.557	1.044	1.444	7.81E-02
Q02543	123	S	60S ribosomal protein L18a	RPL18A	1	1.19E-03	89.266	AHS(1)IQIMK	2	0.03343	8	1.057	0.731	1.29	1.171	0.805	0.945	0.980	0.898	0.920	1.092	1.040	1.070	1.079	0.814	1.402	1.072	0.774	0.883	0.828	3.80E-01
Q02880	1581	S	DNA topoisomerase 2-beta	TOP2B	0.933737	1.14E-24	98.636	KT(0.051)S(0.016)FDQDS(0.934)DVDIFPSDFPTEPPSLPR	3	-0.10993	15	0.812	1.228	1.169	0.916	0.863	1.012	0.972	1.021	1.113	1.045	0.752	1.097	0.835	1.203	1.050	0.877	1.148	0.923	0.954	7.45E-01
Q02880	1552	S	DNA topoisomerase 2-beta	TOP2B	1	4.86E-09	113.49	KAS(1)GS(1)ENEGDYNPGR	2	0.0038319	3	1.115			1.062		0.822	0.972	1.021	1.113	1.045	0.752	1.097	1.147			1.016		0.749	0.770
Q02880	1550	S	DNA topoisomerase 2-beta	TOP2B	1	4.86E-09	113.49	KAS(1)GS(1)ENEGDYNPGR	2	0.0038319	9	1.676	0.577	0.84	1.268	1.092	0.548	0.972	1.021	1.113	1.045	0.752	1.097	1.724	0.565	0.755	1.213	1.452	0.500	1.040	9.34E-01
Q02880	1413	S	DNA topoisomerase 2-beta	TOP2B	0.983654	1.24E-06	48.495	VKAS(0.983)PIT(0.021)NDGEDEFVPS(0.984)DGLDKDEY(0.007)T(0.004)FS(0.001)PGK	3	-0.24697	1	1.116				1.273	0.611	0.972	1.021	1.113	1.045	0.752	1.097	1.148				1.693	0.557	0.980
Q02880	1400	S	DNA topoisomerase 2-beta	TOP2B	0.983405	1.24E-06	48.495	VKAS(0.983)PIT(0.021)NDGEDEFVPS(0.984)DGLDKDEY(0.007)T(0.004)FS(0.001)PGK	3	-0.24697	1	1.116				1.273	0.611	0.972	1.021	1.113	1.045	0.752	1.097	1.148				1.693	0.557	0.980
Q02880	1466	S	DNA topoisomerase 2-beta	TOP2B	0.999928	3.09E-07	76.998	FDS(1)NEEDSASVFSPSFGLK	3	1.4765	4	0.927	0.804	1.088		0.877	1.305	0.972	1.021	1.113	1.045	0.752	1.097	0.954	0.787	0.978		1.166	1.190	1.300	3.95E-02
Q02952	627	S	A-kinase anchor protein 12	AKAP12	1	1.01E-28	168.42	RPS(1)ES(1)DKEDELDK	3	0.80754	16	0.928	0.742	1.162	0.903	1.159	1.105	0.916	0.980	0.884	1.083	1.094	1.043	1.013	0.757	1.314	0.834	1.059	1.059	0.957	8.17E-01
Q02952	629	S	A-kinase anchor protein 12	AKAP12	1	3.74E-05	85.362	RPS(1)ES(1)DKEDELDK	3	0.80754	6	1.68			0.502	0.836	0.983	0.916	0.980	0.884	1.083	1.094	1.043	1.834			0.464	0.764	0.942	0.394
Q02952	598	S	A-kinase anchor protein 12	AKAP12	0.905637	4.88E-15	85.777	GLAEVQQDGEAEEGAT(0.094)S(0.906)DGEK	2	1.6378	14	1.064	1.036	0.886	0.883	1.078	1.053	0.916	0.980	0.884	1.083	1.094	1.043	1.162	1.057	1.002	0.815	0.985	1.010	0.872	1.50E-01
Q02952	381	S	A-kinase anchor protein 12	AKAP12	0.971283	3.39E-29	96.793	VELPS(0.971)EEQVS(0.014)GS(0.014)QGPS(0.001)EEKPAPLATEVFDEK	4	1.2856	8	1.174	1.196	1.175		0.456		0.916	0.980	0.884	1.083	1.094	1.043	1.282	1.220	1.329		0.417		0.326
Q02952	1331	S	A-kinase anchor protein 12	AKAP12	0.967771	9.78E-04	93.843	S(0.032)PPS(0.968)PVER	2	-0.031379	9	1.015	1.169				0.815	0.916	0.980	0.884	1.083	1.094	1.043	1.108	1.193				0.781	0.679
Q03001	1382	S	Dystonin	DST	0.913188	2.26E-02	46.249	AMVDS(0.087)QQKS(0.913)PVKR	3	-0.73943	1	1.599		0.594	0.906		0.901	0.959	1.002	0.926	1.079	0.981	1.054	1.667		0.641	0.840		0.855	0.734	6.10E-01
Q03111	447	S	Protein ENL	MLLT1	0.996153	6.48E-11	109.85	LSFSDSESDNS(0.996)ADS(0.003)S(0.001)LPSR	2	1.1035	5	1.293	0.908		1.069		0.731	0.785	1.025	1.097	1.105		0.987	1.647	0.886		0.967		0.741	0.674	4.08E-01
Q03111	440	S	Protein ENL	MLLT1	0.847807	6.09E-08	87.676	LS(0.238)FS(0.848)DS(0.684)ES(0.21)DNS(0.019)ADSSLPSR	2	0.27744	3	1.279		1.599	0.959	0.72	0.442	0.785	1.025	1.097	1.105		0.987	1.629		1.458	0.868		0.448	0.426	5.98E-02
Q03111	292	S	Protein ENL	MLLT1	0.999995	3.97E-40	194.05	RPATADS(1)PKPSAK	3	0.13487	13	1.021	1.601	0.838	0.743	0.645	1.151	0.785	1.025	1.097	1.105		0.987	1.301	1.562	0.764	0.672		1.166	0.760	4.74E-01
Q03112	858	S	MDS1 and EVI1 complex locus protein EVI1	MECOM	0.867403	2.59E-03	49.537	NFIGNS(0.052)NHGS(0.867)QS(0.081)PR	2	0.89878	1	0.988	1.148	0.752	0.621		1.49						1.000						1.490
Q03135	37	S	Caveolin-1	CAV1	1	4.76E-10	164.81	AMADELS(1)EK	2	-0.37663	30	1.013	1.319	1.277	0.675	1.069	0.647	1.136	1.024	1.030	1.025	0.849	0.936	0.892	1.288	1.240	0.659	1.259	0.691	0.763	3.08E-01
Q03135	9	S	Caveolin-1	CAV1	0.999455	3.85E-05	81.346	YVDS(0.999)EGHLYTVPIR	3	0.85441	5	1.387	1.034	1.258		0.774	0.546	1.136	1.024	1.030	1.025	0.849	0.936	1.221	1.010	1.221		0.912	0.583	0.650	7.74E-02
Q03164	3518	S	Histone-lysine N-methyltransferase 2A	KMT2A	0.883308	3.32E-19	101.86	ALS(0.004)S(0.021)AVQAS(0.776)PT(0.08)S(0.118)PGGS(0.003)PS(0.07)S(0.883)PS(0.035)S(0.01)GQR	2	-0.7521	11	0.898	2.21	0.822	0.643	0.428		1.101	0.991	1.033	1.073	0.946	0.857	0.816	2.230	0.796	0.599	0.452		0.411	3.08E-01
Q03164	1837	S	Histone-lysine N-methyltransferase 2A	KMT2A	0.974909	2.30E-23	123.71	GPGEPDS(0.975)PT(0.04)PLHPPT(0.984)PPILST(0.001)DR	3	0.32405	25	1.192		1.003	0.964	0.973	0.868	1.101	0.991	1.033	1.073	0.946	0.857	1.083		0.971	0.898	1.029	1.013	0.954	5.36E-01
Q03164	1056	S	Histone-lysine N-methyltransferase 2A	KMT2A	0.946262	4.39E-05	84.375	AQGQES(0.946)DS(0.042)S(0.011)ET(0.001)SVR	2	2.2259	1	0.82		1.503	0.904		0.773	1.101	0.991	1.033	1.073	0.946	0.857	0.745		1.455	0.842		0.902	0.793	5.88E-01
Q03164	3508	S	Histone-lysine N-methyltransferase 2A	KMT2A	0.776076	3.32E-19	101.86	ALS(0.004)S(0.021)AVQAS(0.776)PT(0.08)S(0.118)PGGS(0.003)PS(0.07)S(0.883)PS(0.035)S(0.01)GQR	2	-0.7521	3		0.969		1.031			1.101	0.991	1.033	1.073	0.946	0.857		0.978		0.961			0.983
Q03164	2201	S	Histone-lysine N-methyltransferase 2A	KMT2A	0.986838	1.21E-04	91.245	HSTS(0.001)S(0.011)LS(0.987)PQR	2	-2.6157	2	1.624	0.93	1.181	0.885	0.915	0.465	1.101	0.991	1.033	1.073	0.946	0.857	1.475	0.938	1.143	0.825	0.967	0.543	0.656	1.11E-01
Q03164	742	S	Histone-lysine N-methyltransferase 2A	KMT2A	1	1.02E-02	101.54	KVFS(1)PIR	2	-0.070241	4	1.035	1.648		0.795	0.814	0.709	1.101	0.991	1.033	1.073	0.946	0.857	0.940	1.663		0.741	0.860	0.827	0.622	1.70E-01
Q03164	1119	S	Histone-lysine N-methyltransferase 2A	KMT2A	0.996155	3.30E-08	66.828	S(0.002)S(0.002)IAGS(0.996)EDAEPLAPPIKPIKPVTR	3	0.21855	5		1.304	1.054	0.941		0.702	1.101	0.991	1.033	1.073	0.946	0.857		1.316	1.020	0.877		0.819	0.726	1.67E-01
Q03164	3527	S	Histone-lysine N-methyltransferase 2A	KMT2A	0.987314	3.98E-07	99.663	S(0.004)AS(0.987)PS(0.008)VPGPTK	2	0.79723	14	1.016	0.759	1.088	1.091	1.06	0.986	1.101	0.991	1.033	1.073	0.946	0.857	0.923	0.766	1.053	1.017	1.121	1.151	1.199	1.20E-01
Q03164	1845	T	Histone-lysine N-methyltransferase 2A	KMT2A	0.993724	6.08E-15	82.988	GPGEPDS(0.756)PT(0.246)PLHPPT(0.994)PPILS(0.002)T(0.002)DR	3	0.51432	17	1.209	1.058	0.996	0.806	1.185	0.745	1.101	0.991	1.033	1.073	0.946	0.857	1.098	1.068	0.964	0.751	1.253	0.869	0.918	6.14E-01
Q03164	2151	S	Histone-lysine N-methyltransferase 2A	KMT2A	0.995502	1.26E-05	127.52	TPS(0.003)YS(0.996)PT(0.001)QR	2	0.59481	4	1.246	1.216	0.891		0.647		1.101	0.991	1.033	1.073	0.946	0.857	1.132	1.227	0.863		0.684		0.637
Q03164	3511	S	Histone-lysine N-methyltransferase 2A	KMT2A	0.910829	3.66E-19	98.002	ALS(0.001)S(0.001)AVQAS(0.036)PT(0.05)S(0.911)PGGS(0.009)PS(0.235)S(0.745)PS(0.009)S(0.003)GQR	3	0.67629	8	1.059	0.98		0.339	1.332	1.29	1.101	0.991	1.033	1.073	0.946	0.857	0.962	0.989		0.316	1.408	1.505	1.104	8.51E-01
Q03164	3036	S	Histone-lysine N-methyltransferase 2A	KMT2A	0.932976	2.49E-10	81.65	NSS(0.001)TPGLQVPVS(0.933)PT(0.065)VPIQNQK	3	-1.6122	8	0.94	0.795	0.875	1.093	1.067	1.231	1.101	0.991	1.033	1.073	0.946	0.857	0.854	0.802	0.847	1.019	1.128	1.436	1.431	4.62E-02
Q03164	337	T	Histone-lysine N-methyltransferase 2A	KMT2A	0.999931	1.45E-10	118.52	DKEGT(1)PPLTK	3	-0.41847	10			0.757	0.949		1.295	1.101	0.991	1.033	1.073	0.946	0.857			0.733	0.884		1.511	1.634
Q03164	2098	S	Histone-lysine N-methyltransferase 2A	KMT2A	0.999725	1.29E-22	140.89	TIAHS(1)PTSFTESSSK	2	0.87587	13	1.075	0.994	0.872	0.895	0.898	1.266	1.101	0.991	1.033	1.073	0.946	0.857	0.976	1.003	0.844	0.834	0.949	1.477	1.155	5.15E-01
Q03164	1858	S	Histone-lysine N-methyltransferase 2A	KMT2A	0.997551	5.29E-13	118.36	S(0.002)REDS(0.998)PELNPPPGIEDNR	2	0.046032	21	1.123	0.987	1.266	0.915	0.941	0.768	1.101	0.991	1.033	1.073	0.946	0.857	1.020	0.996	1.226	0.853	0.995	0.896	0.846	1.20E-01
Q03164	2938	S	Histone-lysine N-methyltransferase 2A	KMT2A	0.974442	2.70E-06	103.97	S(0.974)PT(0.026)VPSQNPSR	2	0.41068	5	1.029		0.847	1.031	1.063	1.03	1.101	0.991	1.033	1.073	0.946	0.857	0.935		0.820	0.961	1.124	1.202	1.249	1.20E-01
Q03188	333	S	Centromere protein C	CENPC	0.9758	2.41E-04	72.489	T(0.024)IS(0.976)PAESTALLQGR	2	2.0471	1	1.469	0.9	0.957	0.838	1.157	0.68	0.918		1.082				1.600		0.884
Q03188	73	S	Centromere protein C	CENPC	0.996549	7.51E-19	171.08	DTCIQS(0.997)PS(0.003)KECQK	2	-0.64293	15		1.854	1.098	0.523	0.71	0.815	0.918		1.082						1.015
Q03252	37	S	Lamin-B2	LMNB2	0.892482	2.30E-14	130.27	AGGPATPLS(0.892)PT(0.107)R	2	-0.69581	6	1.394	1.21	0.832	1.086	0.606	0.871	1.136	1.139	1.051	0.895	0.888	0.891	1.227	1.062	0.792	1.213	0.682	0.978	0.933	7.46E-01
Q03252	316	S	Lamin-B2	LMNB2	0.999909	4.23E-33	180.06	LES(1)LSYQLSGLQK	2	-0.21766	8	1.828	0.755	1.156	0.84	0.744	0.677	1.136	1.139	1.051	0.895	0.888	0.891	1.609	0.663	1.100	0.939	0.838	0.760	0.752	3.73E-01
Q03468	158	S	DNA excision repair protein ERCC-6	ERCC6	0.999968	6.10E-11	124.5	IIEQLS(1)PQAATSR	2	-0.5605	2	1.102	0.837	0.93	1.092	1.072	0.966	1.084	0.902	0.878	0.984	1.083	1.069	1.017	0.928	1.059	1.110	0.990	0.904	1.000	9.98E-01
Q03468	486	S	DNA excision repair protein ERCC-6	ERCC6	1	3.51E-08	93.166	LKLEDDS(1)EES(1)DAEFDEGFK	2	0.045153	12	1.537	0.906		0.924	0.707	0.926	1.084	0.902	0.878	0.984	1.083	1.069	1.418	1.004		0.939	0.653	0.866	0.677	1.31E-01
Q03468	489	S	DNA excision repair protein ERCC-6	ERCC6	1	3.51E-08	93.166	LKLEDDS(1)EES(1)DAEFDEGFK	2	0.045153	12	1.537	0.906		0.924	0.707	0.926	1.084	0.902	0.878	0.984	1.083	1.069	1.418	1.004		0.939	0.653	0.866	0.677	1.31E-01
Q03468	429	S	DNA excision repair protein ERCC-6	ERCC6	0.999603	1.14E-10	59.855	VPVQEIDDDFFPS(1)S(1)GEEAEAAS(0.001)VGEGGGGGR	3	-1.0927	7	0.835		0.963	1.142		1.06	1.084	0.902	0.878	0.984	1.083	1.069	0.770		1.097	1.161		0.992	1.153	5.19E-01
Q03468	430	S	DNA excision repair protein ERCC-6	ERCC6	0.999603	1.14E-10	59.855	VPVQEIDDDFFPS(1)S(1)GEEAEAAS(0.001)VGEGGGGGR	3	-1.0927	7	0.835		0.963	1.142		1.06	1.084	0.902	0.878	0.984	1.083	1.069	0.770		1.097	1.161		0.992	1.153	5.19E-01
Q04637	1209	S	Eukaryotic translation initiation factor 4 gamma 1	EIF4G1	0.999632	1.94E-18	177.41	AAS(1)LTEDRDR	2	0.11423	26	0.648	0.72	0.708	1.221	1.431	1.271
Q04637	1211	T	Eukaryotic translation initiation factor 4 gamma 1	EIF4G1	0.866978	2.37E-10	144.97	KAAS(0.133)LT(0.867)EDRDR	2	0.54133	2			0.437		1.211	1.351
Q04637	1194	S	Eukaryotic translation initiation factor 4 gamma 1	EIF4G1	0.999998	5.61E-10	112.12	S(1)RERPSQPEGLR	3	-0.096542	6	0.932	1.363	0.901	0.818	1.316	0.67
Q04637	1231	S	Eukaryotic translation initiation factor 4 gamma 1	EIF4G1	1	9.55E-07	108.58	EAALPPVS(1)PLK	2	0.25239	23	1.092	0.814	0.792	1.22	0.994	1.088
Q04637	1187	S	Eukaryotic translation initiation factor 4 gamma 1	EIF4G1	0.999944	2.23E-05	125.36	SFS(1)KEVEER	2	0.1832	19	0.622		0.691	0.867	1.775	1.046
Q04912	1056	S	Macrophage-stimulating protein receptor	MST1R	1	9.61E-03	93.938	KES(1)IQLR	2	0.055023	4	0.946	1.917	1.527	0.474	0.719	0.417			1.000						1.527
Q05193	774	S	Dynamin-1	DNM1	0.981567	8.21E-03	62.494	RS(0.982)PT(0.007)S(0.004)S(0.001)PT(0.006)PQR	2	-1.4756	1	1.216			1.05		0.734
Q05209	598	T	Tyrosine-protein phosphatase non-receptor type 12	PTPN12	0.943934	4.46E-25	142.32	TPLS(0.002)FT(0.944)NPLHS(0.063)DDS(0.971)DS(0.02)DER	2	-0.67521	5	1.354	0.714	1.085	1.01		0.837	1.012	0.963	1.072	0.930	1.010	1.014	1.338	0.741	1.012	1.086		0.825	0.927	7.78E-01
Q05209	673	S	Tyrosine-protein phosphatase non-receptor type 12	PTPN12	0.992741	2.06E-31	156.67	DVDVS(0.007)EDS(0.993)PPPLPER	2	1.4535	22	0.984	0.783	1.079	1.213	1.081	0.859	1.012	0.963	1.072	0.930	1.010	1.014	0.972	0.813	1.007	1.304	1.070	0.847	1.154	3.79E-01
Q05209	509	T	Tyrosine-protein phosphatase non-receptor type 12	PTPN12	0.997154	1.83E-16	115.54	VS(0.002)VT(0.997)PPEESQNSDTPPRPDR	3	-0.041109	17	0.976	1.001	0.708	1.009	1.33	0.976	1.012	0.963	1.072	0.930	1.010	1.014	0.964	1.039	0.660	1.085	1.317	0.963	1.263	2.08E-01
Q05209	603	S	Tyrosine-protein phosphatase non-receptor type 12	PTPN12	0.999859	2.10E-46	169.41	TPLSFTNPLHS(1)DDS(0.967)DS(0.033)DER	3	-0.88252	9	0.997	0.857	0.891	1.233	1.201	0.82	1.012	0.963	1.072	0.930	1.010	1.014	0.985	0.890	0.831	1.326	1.189	0.809	1.228	2.71E-01
Q05209	606	S	Tyrosine-protein phosphatase non-receptor type 12	PTPN12	0.970859	2.10E-46	169.41	TPLS(0.002)FT(0.944)NPLHS(0.063)DDS(0.971)DS(0.02)DER	2	-0.67521	14	1.391	0.734	1.115	1.038	0.862	0.861	1.012	0.963	1.072	0.930	1.010	1.014	1.375	0.762	1.040	1.116	0.853	0.849	0.887	5.79E-01
Q05209	435	S	Tyrosine-protein phosphatase non-receptor type 12	PTPN12	1	1.88E-02	61.09	NLS(1)FEIK	2	0.24824	10	1.606	0.796	0.905	0.879	0.759	1.056	1.012	0.963	1.072	0.930	1.010	1.014	1.587	0.827	0.844	0.945	0.751	1.041	0.840	5.49E-01
Q05519	434	S	Serine/arginine-rich splicing factor 11	SRSF11	1	1.25E-58	206.62	DYDEEEQGYDS(1)EKEKK	2	-0.30119	78	1.139	0.65	0.657	1.483	1.065	1.006	0.957	0.866	0.900	1.111	1.090	1.077	1.190	0.751	0.730	1.335	0.977	0.934	1.215	3.85E-01
Q05519	207	S	Serine/arginine-rich splicing factor 11	SRSF11	0.972535	6.20E-22	144.83	LNHVAAGLVS(0.973)PS(0.027)LK	2	-0.020708	25	1.007	0.832	0.771	0.867	1.563	0.96	0.957	0.866	0.900	1.111	1.090	1.077	1.052	0.961	0.857	0.780	1.434	0.891	1.082	7.27E-01
Q05519	449	S	Serine/arginine-rich splicing factor 11	SRSF11	0.999604	4.36E-09	157.28	KPIETGS(1)PK	2	-0.10269	9	0.919	1.504	0.64	0.891	0.729	1.316	0.957	0.866	0.900	1.111	1.090	1.077	0.960	1.737	0.711	0.802	0.669	1.222	0.790	5.34E-01
Q05655	645	S	Protein kinase C delta type	PRKCD	0.956145	2.01E-04	131.42	ARLS(0.956)Y(0.002)S(0.041)DK	2	1.0808	5	0.603		0.978	0.804	0.914	1.702	1.112	1.025	1.058	0.920	0.965	0.920	0.542		0.924	0.874	0.947	1.850	1.669	3.36E-01
Q05D32	134	S	CTD small phosphatase-like protein 2	CTDSPL2	0.940141	6.28E-10	113.67	LEDNPS(0.009)S(0.051)GS(0.94)PPR	2	-1.911	2	1.419			0.996	0.884	0.701	1.158	1.339	1.181	0.864	0.679	0.780	1.225			1.153	1.302	0.899	0.912
Q06190	181	S	Serine/threonine-protein phosphatase 2A regulatory subunit B'' subunit alpha	PPP2R3A	0.888107	1.83E-03	58.079	S(0.056)S(0.056)S(0.888)VEEKPLSHR	3	1.454	1	1.067			1.154	0.779
Q06210	261	S	Glutamine--fructose-6-phosphate aminotransferase [isomerizing] 1	GFPT1	0.966165	9.76E-28	164.53	VDS(0.966)T(0.031)T(0.003)CLFPVEEK	2	0.18558	13	1.043	0.931	0.798	1.098	1.134	0.996	0.886	0.962	1.013	0.949	1.083	1.107	1.177	0.968	0.788	1.157	1.047	0.900	1.058	6.94E-01
Q06265	306	S	Exosome complex component RRP45	EXOSC9	0.989231	5.52E-12	150.9	APIDT(0.011)S(0.989)DVEEK	2	-0.072334	11	1.119		1.07	0.934	0.883	0.993	0.979	1.009	1.035	0.983	1.012	0.982	1.143		1.034	0.950	0.873	1.011	0.868	1.17E-01
Q06587	243	T	E3 ubiquitin-protein ligase RING1	RING1	0.861001	3.11E-07	51.203	GGT(0.07)LGGGT(0.861)LGPPS(0.289)PPGAPS(0.78)PPEPGGEIELVFR	3	2.1819	6	1.168	0.964	0.795		1.084	0.989	0.953	1.196	1.030	0.948	0.956	0.917	1.226	0.806	0.772		1.134	1.079	1.184	4.32E-01
Q06587	38	S	E3 ubiquitin-protein ligase RING1	RING1	0.999993	3.19E-06	75.868	TPQEAIMDGTEIAVS(1)PR	3	0.27455	7	0.982	0.763	1.242	0.952	1.157	0.904	0.953	1.196	1.030	0.948	0.956	0.917	1.030	0.638	1.206	1.004	1.210	0.986	1.113	5.84E-01
Q06587	254	S	E3 ubiquitin-protein ligase RING1	RING1	0.985792	3.11E-07	51.203	GGT(0.147)LGGGT(0.805)LGPPS(0.063)PPGAPS(0.986)PPEPGGEIELVFR	3	2.305	7	1.091	0.901	0.743	1.328	1.013	0.924	0.953	1.196	1.030	0.948	0.956	0.917	1.145	0.753	0.721	1.401	1.060	1.008	1.324	1.98E-01
Q07021	201	S	Complement component 1 Q subcomponent-binding protein, mitochondrial	C1QBP	0.998253	5.99E-25	101.34	ALVLDCHYPEDEVGQEDEAES(0.998)DIFS(0.002)IR	3	-0.70992	23	1.268	1.455	0.357		0.92		1.141	0.751	0.858	1.061	1.098	1.091	1.111	1.937	0.416		0.838		0.725
Q07021	213	S	Complement component 1 Q subcomponent-binding protein, mitochondrial	C1QBP	0.910666	2.14E-07	108.63	EVS(0.002)FQS(0.911)T(0.066)GES(0.022)EWK	2	1.9242	6		1.006	1.078	0.998	1.074	0.845	1.141	0.751	0.858	1.061	1.098	1.091		1.340	1.256	0.941	0.978	0.775	0.692	1.90E-02
Q07157	131	S	Tight junction protein ZO-1	TJP1	0.976829	2.43E-06	48.265	VQIPVS(0.04)RPDPEPVS(0.961)DNEEDS(0.977)Y(0.022)DEEIHDPR	4	0.48794	1		1.04			0.96		1.011	1.040	0.990	0.953	0.997	1.009		1.000			0.963		0.963
Q07157	617	S	Tight junction protein ZO-1	TJP1	0.999817	1.50E-27	164.5	S(1)REDLSAQPVQTK	2	-0.0015596	16	1.121	0.638	1.002	0.977	1.293	0.97	1.011	1.040	0.990	0.953	0.997	1.009	1.109	0.613	1.012	1.025	1.297	0.961	1.201	3.74E-01
Q07157	402	S	Tight junction protein ZO-1	TJP1	0.917266	3.26E-19	81.18	PVYAQVGQPDVDLPVS(0.917)PS(0.082)DGVLPNSTHEDGILRPSMK	4	2.0046	11	0.961	0.747	0.682	1.098	1.513		1.011	1.040	0.990	0.953	0.997	1.009	0.951	0.718	0.689	1.152	1.518		1.698	5.04E-02
Q07157	1111	S	Tight junction protein ZO-1	TJP1	0.784739	1.55E-08	67.827	QPY(0.001)PS(0.214)RPPFDNQHS(0.785)QDLDSR	4	0.062994	3		0.713	0.372	1.9	1.015		1.011	1.040	0.990	0.953	0.997	1.009		0.686	0.376	1.994	1.018		2.838	1.97E-01
Q07157	166	S	Tight junction protein ZO-1	TJP1	1	4.43E-03	116.52	ERS(1)LS(1)PR	2	0.57721	7	1.05	0.988	1.438	0.986	0.866	0.672	1.011	1.040	0.990	0.953	0.997	1.009	1.039	0.950	1.453	1.035	0.869	0.666	0.747	1.97E-01
Q07157	294	S	Tight junction protein ZO-1	TJP1	0.982781	8.06E-11	112.36	DDISEIQS(0.983)LAS(0.868)DHS(0.149)GR	3	-0.038466	12	1.942	1.261	0.067	0.73			1.011	1.040	0.990	0.953	0.997	1.009	1.921	1.213	0.068	0.766			0.718
Q07157	354	T	Tight junction protein ZO-1	TJP1	0.891371	2.46E-02	59.265	ISKPGAVS(0.109)T(0.891)PVK	2	-0.20959	4	1.108		0.848	1.144		0.9	1.011	1.040	0.990	0.953	0.997	1.009	1.096		0.857	1.200		0.892	1.072	7.54E-01
Q07157	179	S	Tight junction protein ZO-1	TJP1	0.99992	1.12E-06	98.328	S(0.004)VAS(0.996)S(1)QPAKPTK	2	0.59818	5	0.551	1.516	1.367	0.754	0.91	0.902	1.011	1.040	0.990	0.953	0.997	1.009	0.545	1.458	1.381	0.791	0.913	0.894	0.768	4.24E-01
Q07157	912	S	Tight junction protein ZO-1	TJP1	1	2.27E-15	137.89	IDS(1)PGFKPASQQK	2	0.1504	16	0.88	0.905	0.944	0.938	1.231	1.103	1.011	1.040	0.990	0.953	0.997	1.009	0.870	0.870	0.954	0.984	1.235	1.093	1.229	5.68E-02
Q07157	899	S	Tight junction protein ZO-1	TJP1	0.853742	8.30E-30	111.31	EDSSGMHHENQT(0.046)Y(0.014)PPY(0.086)S(0.854)PQAQPQPIHR	4	2.6888	5	0.743	1.192		1.246		0.819	1.011	1.040	0.990	0.953	0.997	1.009	0.735	1.146		1.307		0.812	1.127	7.47E-01
Q07157	125	S	Tight junction protein ZO-1	TJP1	0.960863	2.70E-10	58.349	VQIPVS(0.04)RPDPEPVS(0.961)DNEEDS(0.977)Y(0.022)DEEIHDPR	4	0.48794	7	0.589	2.34	0.546	0.619	1.444	0.462	1.011	1.040	0.990	0.953	0.997	1.009	0.583	2.250	0.552	0.650	1.448	0.458	0.755	6.87E-01
Q07157	1619	S	Tight junction protein ZO-1	TJP1	0.853172	7.80E-17	95.153	AIPVS(0.147)PS(0.853)AVEEDEDEDGHTVVATAR	2	-0.070375	5	0.398				1.602		1.011	1.040	0.990	0.953	0.997	1.009	0.394				1.607		4.082
Q07157	329	S	Tight junction protein ZO-1	TJP1	0.999492	1.49E-03	58.577	HS(0.999)PQQPSNGSLR	2	1.7047	3	1.121					0.879	1.011	1.040	0.990	0.953	0.997	1.009	1.109					0.871	0.786
Q07157	275	S	Tight junction protein ZO-1	TJP1	0.998011	2.67E-18	103.14	AT(0.001)LLNVPDLS(0.998)DS(0.983)IHS(0.017)ANAS(0.001)ER	3	-0.44454	11	2.348	0.244	0.986		0.422		1.011	1.040	0.990	0.953	0.997	1.009	2.322	0.235	0.996		0.423		0.357
Q07157	300	S	Tight junction protein ZO-1	TJP1	0.996557	5.39E-50	184.6	DDIS(0.002)EIQS(0.501)LAS(0.501)DHS(0.997)GR	2	-0.59918	44	1.399	1.041	1.214	0.593	0.323	1.43	1.011	1.040	0.990	0.953	0.997	1.009	1.384	1.001	1.226	0.622	0.324	1.417	0.655	2.94E-01
Q07157	297	S	Tight junction protein ZO-1	TJP1	0.997944	2.48E-32	165.66	DDISEIQS(0.001)LAS(0.998)DHS(0.001)GR	2	0.54397	62	1.056	0.775	0.918	1.173	1.032	1.045	1.011	1.040	0.990	0.953	0.997	1.009	1.045	0.745	0.927	1.231	1.035	1.036	1.215	1.48E-01
Q07157	968	S	Tight junction protein ZO-1	TJP1	0.997803	3.07E-17	118.24	LEEPTPAPST(0.001)S(0.001)YS(0.998)PQADS(0.001)LR	2	0.64368	13	1.095	0.802	1.097	1.125	0.945	0.936	1.011	1.040	0.990	0.953	0.997	1.009	1.083	0.771	1.108	1.180	0.948	0.928	1.032	8.29E-01
Q07157	280	S	Tight junction protein ZO-1	TJP1	0.993935	7.71E-12	89.024	ATLLNVPDLS(0.005)DS(0.995)IHS(0.994)ANAS(0.006)ER	3	0.42236	13	2.506	1.228	1.148	0.418	0.383	0.317	1.011	1.040	0.990	0.953	0.997	1.009	2.479	1.181	1.160	0.439	0.384	0.314	0.236	4.86E-02
Q07157	303	S	Tight junction protein ZO-1	TJP1	0.99779	1.10E-10	78.319	DDIS(0.003)EIQS(0.035)LAS(0.975)DHS(0.99)GRS(0.998)HDRPPR	4	-0.26058	12			0.519	1.255	0.841	1.384	1.011	1.040	0.990	0.953	0.997	1.009			0.524	1.317	0.844	1.372	2.246
Q07157	168	S	Tight junction protein ZO-1	TJP1	1	5.33E-03	82.445	ERS(1)LS(1)PR	2	0.57721	3	0.959	1.032	1.541	0.961	0.889	0.618	1.011	1.040	0.990	0.953	0.997	1.009	0.949	0.992	1.557	1.008	0.892	0.612	0.718	2.24E-01
Q07157	277	S	Tight junction protein ZO-1	TJP1	0.996206	5.08E-40	158.05	ATLLNVPDLS(0.003)DS(0.996)IHS(0.001)ANASER	3	-0.64316	38	1.65	0.801	0.723	0.97	0.999	0.857	1.011	1.040	0.990	0.953	0.997	1.009	1.632	0.770	0.730	1.018	1.002	0.849	0.916	7.84E-01
Q07157	178	S	Tight junction protein ZO-1	TJP1	0.998223	1.12E-06	98.328	S(0.002)VAS(0.998)S(1)QPAKPTK	2	-0.14291	4	0.738	0.933	0.894	1.009	1.219	1.207	1.011	1.040	0.990	0.953	0.997	1.009	0.730	0.897	0.903	1.059	1.223	1.196	1.375	1.43E-02
Q07157	175	S	Tight junction protein ZO-1	TJP1	0.999258	2.94E-14	131.86	S(0.999)VAS(0.001)SQPAKPTK	2	-0.76158	4	1.384	0.958	1.24	0.838	0.806	0.775	1.011	1.040	0.990	0.953	0.997	1.009	1.369	0.921	1.253	0.879	0.808	0.768	0.693	5.85E-02
Q07157	1617	S	Tight junction protein ZO-1	TJP1	0.994974	2.45E-71	184.03	AIPVS(0.995)PS(0.005)AVEEDEDEDGHTVVATAR	3	-0.35843	24	0.501	0.413	0.346	1.462	2.017	1.261	1.011	1.040	0.990	0.953	0.997	1.009	0.496	0.397	0.349	1.534	2.023	1.250	3.870	6.66E-03
Q07157	810	S	Tight junction protein ZO-1	TJP1	0.862468	3.42E-04	62.357	ADGAT(0.138)S(0.862)DDLDLHDDR	3	-1.3624	8	1.23	0.784	0.914	1.144	0.907	1.021	1.011	1.040	0.990	0.953	0.997	1.009	1.217	0.754	0.923	1.200	0.910	1.012	1.079	6.59E-01
Q07157	1366	S	Tight junction protein ZO-1	TJP1	0.999759	4.30E-06	59.359	S(1)FENKPPAHIAASHLSEPAK	4	-0.48113	2		1.077	0.8			1.123	1.011	1.040	0.990	0.953	0.997	1.009		1.036	0.808			1.113	1.207
Q07352	54	S	mRNA decay activator protein ZFP36L1	ZFP36L1	0.988192	1.80E-04	81.565	RHS(0.988)VT(0.012)LPSSK	3	-0.14493	2	0.827	0.819			1.354
Q07866	460	S	Kinesin light chain 1	KLC1	0.999976	4.30E-10	131.66	VDS(1)PTVTTTLK	2	1.3134	6	0.644	1.018	0.965	1.023	1.366	0.984	0.993	1.025	0.848	1.090	1.044	1.000	0.649	0.993	1.138	0.939	1.308	0.984	1.162	4.64E-01
Q07912	785	S	Activated CDC42 kinase 1	TNK2	0.976498	7.68E-03	44.734	VPPREPLS(0.976)PQGS(0.024)R	3	0.10237	1	1.981	0.663	0.98	0.956	0.884	0.536
Q07955	201	S	Serine/arginine-rich splicing factor 1	SRSF1	1	1.20E-08	109.79	VDGPRS(1)PS(1)YGR	3	-0.11733	33	0.974	0.725	0.864	1.297	0.979	1.162	1.022	0.963	1.012	0.990	1.054	0.958	0.953	0.753	0.854	1.310	0.929	1.213	1.349	8.11E-02
Q07955	199	S	Serine/arginine-rich splicing factor 1	SRSF1	1	1.20E-08	110.51	VDGPRS(1)PS(1)YGR	2	-0.082859	47	0.985	0.747	0.865	1.276	0.976	1.151	1.022	0.963	1.012	0.990	1.054	0.958	0.964	0.776	0.855	1.289	0.926	1.201	1.317	8.84E-02
Q07960	51	S	Rho GTPase-activating protein 1	ARHGAP1	0.98633	1.25E-04	79.886	S(0.007)S(0.007)S(0.986)PELVTHLK	2	0.12417	23	0.87	0.676	0.586	1.085	1.461	1.323	0.931	0.960	1.079	0.968	1.059	1.003	0.934	0.704	0.543	1.121	1.380	1.319	1.751	1.67E-02
Q08170	456	S	Serine/arginine-rich splicing factor 4	SRSF4	0.96411	3.73E-05	98.167	S(0.002)KPNLPS(0.964)ES(0.034)R	3	0.35929	10	0.464	3.573	0.395	0.436	0.687	0.444	1.044	1.151	0.951	0.981	0.952	0.921	0.444	3.104	0.415	0.444	0.722	0.482	0.416	4.37E-01
Q08170	458	S	Serine/arginine-rich splicing factor 4	SRSF4	0.999156	3.82E-14	136.26	SKPNLPS(0.001)ES(0.999)RS(1)R	2	0.84666	38	0.797	1.038	1.075	1.003	0.983	1.104	1.044	1.151	0.951	0.981	0.952	0.921	0.763	0.902	1.130	1.022	1.033	1.199	1.164	2.77E-01
Q08170	460	S	Serine/arginine-rich splicing factor 4	SRSF4	0.999989	3.82E-14	136.26	SKPNLPS(0.001)ES(0.999)RS(1)R	2	0.84666	31	0.701	0.881	0.997	0.992	1.3	1.129	1.044	1.151	0.951	0.981	0.952	0.921	0.671	0.765	1.048	1.011	1.366	1.226	1.450	7.18E-02
Q08174	962	S	Protocadherin-1	PCDH1	0.999963	5.36E-08	96.143	IHLPLNYPPGS(1)PDLGR	3	0.10312	50	1.232		0.706	1.27	0.803	0.989			0.935		0.849	1.216			0.755		0.946	0.813	1.165
Q08174	984	S	Protocadherin-1	PCDH1	0.865438	2.14E-20	119.28	SNSPLPSIQLQPQS(0.865)PS(0.061)AS(0.073)K	3	-0.38348	7	0.953	0.802	0.703	1.313	1.196	1.033			0.935		0.849	1.216			0.752		1.409	0.850	1.502
Q08211	449	S	ATP-dependent RNA helicase A	DHX9	0.999731	2.04E-07	121.09	RIS(1)AVSVAER	2	0.22232	17	1.161	1.147	1.141	0.694	1.174	0.683	1.017	1.020	0.966	0.972	1.029	0.996	1.142	1.125	1.181	0.714	1.141	0.686	0.737	1.11E-01
Q08357	268	S	Sodium-dependent phosphate transporter 2	SLC20A2	1	2.26E-09	131.69	VQEAES(1)PVFK	2	0.18897	4	1.165	0.882	1.416	0.817	0.748	0.971	1.363		1.253	0.809	0.771	0.804	0.855		1.130	1.010	0.970	1.208	1.071	6.50E-01
Q08945	673	S	FACT complex subunit SSRP1	SSRP1	0.976988	3.28E-05	86.213	EFVS(0.004)S(0.001)DES(0.072)S(0.946)S(0.977)GENK	2	-0.12422	14	1.199	0.867	0.709	1.051	1.198	0.976	0.760	0.775	0.805	1.268	1.253	1.139	1.578	1.119	0.881	0.829	0.956	0.857	0.739	2.09E-01
Q08945	672	S	FACT complex subunit SSRP1	SSRP1	0.948213	9.94E-49	201.4	EFVSSDES(0.076)S(0.948)S(0.976)GENK	2	-0.22231	51	1.157	0.388	0.317	1.437	1.409	1.291	0.760	0.775	0.805	1.268	1.253	1.139	1.522	0.501	0.394	1.133	1.125	1.133	1.403	4.18E-01
Q08945	671	S	FACT complex subunit SSRP1	SSRP1	0.998671	3.59E-33	176.28	EFVSSDES(0.999)S(0.863)S(0.138)GENK	2	-0.026161	26	1.04	0.818	0.658	1.03	1.438	1.016	0.760	0.775	0.805	1.268	1.253	1.139	1.368	1.055	0.817	0.812	1.148	0.892	0.880	5.30E-01
Q08AD1	862	S	Calmodulin-regulated spectrin-associated protein 2	CAMSAP2	0.99218	9.34E-04	60.246	WLKS(0.992)PT(0.006)T(0.002)PIDPEK	3	0.29821	4	0.426	0.491	0.399	1.441	2.082	1.162
Q08AD1	1019	S	Calmodulin-regulated spectrin-associated protein 2	CAMSAP2	0.810676	8.27E-03	54.09	RFS(0.811)PS(0.189)QVPIQTR	3	1.4601	2	0.704	0.555	1.082	1.659
Q08AE8	464	S	Protein spire homolog 1	SPIRE1	0.999681	2.61E-08	91.416	APT(0.001)LAELDS(1)S(1)ES(0.998)EEET(0.002)LHK	3	-0.22372	10	0.994	1.078	0.978	0.965	1.107	0.878
Q08AE8	467	S	Protein spire homolog 1	SPIRE1	0.997754	2.61E-08	91.416	APT(0.004)LAELDS(0.998)S(0.998)ES(0.998)EEET(0.002)LHK	3	-0.40577	10	0.994	1.078	0.978	0.965	1.107	0.878
Q08AE8	387	S	Protein spire homolog 1	SPIRE1	1	1.36E-05	100.73	LRPVS(1)PEEIRR	3	-0.22911	22	0.852	1.151	1.058	0.896	1.162	0.881
Q08AE8	465	S	Protein spire homolog 1	SPIRE1	0.999683	2.61E-08	91.416	APT(0.001)LAELDS(1)S(1)ES(0.998)EEET(0.002)LHK	3	-0.22372	10	0.994	1.078	0.978	0.965	1.107	0.878
Q08J23	456	S	tRNA (cytosine(34)-C(5))-methyltransferase	NSUN2	0.910691	9.21E-23	128.09	ES(0.064)T(0.025)QLS(0.911)PADLTEGKPTDPSK	3	0.22762	7	0.819		0.897		1.284		0.853	0.935	0.950	1.093	1.078	1.092	0.960		0.944		1.191		1.251
Q09161	22	S	Nuclear cap-binding protein subunit 1	NCBP1	0.995487	4.22E-82	217.65	KT(0.004)S(0.995)DANETEDHLESLICK	3	-1.1402	46	1.933	0.729	0.786	0.949	0.769	0.835	1.000	1.050	0.948	1.022	0.958	1.023	1.933	0.694	0.829	0.929	0.803	0.816	0.737	4.85E-01
Q09666	3054	S	Neuroblast differentiation-associated protein AHNAK	AHNAK	1	1.13E-05	128.85	ADLDVS(1)GPK	2	-0.23854	9	0.902	0.875	0.702	1.066	1.349	1.106	0.882	0.893	0.888	1.080	1.107	1.150	1.023	0.980	0.791	0.987	1.219	0.962	1.134	3.14E-01
Q09666	5763	S	Neuroblast differentiation-associated protein AHNAK	AHNAK	0.935495	2.80E-58	188.24	ASLGSLEGEAEAEAS(0.065)S(0.935)PK	3	-0.92985	48	0.83	0.775	1.082	1.219	1.075	1.018	0.882	0.893	0.888	1.080	1.107	1.150	0.941	0.868	1.218	1.129	0.971	0.885	0.986	9.18E-01
Q09666	2397	S	Neuroblast differentiation-associated protein AHNAK	AHNAK	1	1.26E-08	110.74	ISMPDLDLHLKS(1)PK	3	-0.44948	37	0.678	0.285	0.24	1.309	1.844	1.642	0.882	0.893	0.888	1.080	1.107	1.150	0.769	0.319	0.270	1.212	1.666	1.428	3.170	8.81E-03
Q09666	5780	S	Neuroblast differentiation-associated protein AHNAK	AHNAK	0.999996	1.26E-24	189.13	HRS(1)NS(0.996)FS(0.004)DER	2	-0.20748	31	1.177	0.792	0.862	0.842	1.141	1.186	0.882	0.893	0.888	1.080	1.107	1.150	1.334	0.887	0.971	0.780	1.031	1.031	0.890	5.08E-01
Q09666	3426	S	Neuroblast differentiation-associated protein AHNAK	AHNAK	1	1.53E-07	107.72	VSMPDVELNLKS(1)PK	3	-0.042556	10	0.847	0.397	0.213	1.405	1.973	1.164	0.882	0.893	0.888	1.080	1.107	1.150	0.960	0.445	0.240	1.301	1.782	1.012	2.490	5.81E-02
Q09666	511	S	Neuroblast differentiation-associated protein AHNAK	AHNAK	0.999946	4.63E-33	174.19	ISMQDVDLSLGS(1)PK	2	0.64553	16	1.212	0.974	0.73	1.136	1.028	0.919	0.882	0.893	0.888	1.080	1.107	1.150	1.374	1.091	0.822	1.052	0.929	0.799	0.846	3.89E-01
Q09666	5552	S	Neuroblast differentiation-associated protein AHNAK	AHNAK	0.992061	5.36E-05	59.857	GPAFNMAS(0.992)PES(0.008)DFGINLK	2	-0.37943	1		0.779		1.11	1.246	0.865	0.882	0.893	0.888	1.080	1.107	1.150		0.872		1.028	1.126	0.752	1.110
Q09666	5841	S	Neuroblast differentiation-associated protein AHNAK	AHNAK	0.999726	4.46E-33	174.52	GHYEVTGS(1)DDETGK	2	0.089709	66	0.845	0.827	0.774	1.006	1.149	1.398	0.882	0.893	0.888	1.080	1.107	1.150	0.958	0.926	0.872	0.931	1.038	1.216	1.156	1.74E-01
Q09666	5752	S	Neuroblast differentiation-associated protein AHNAK	AHNAK	0.999999	1.57E-19	138.28	AS(1)LGS(1)LEGEAEAEASSPK	2	0.90752	41	0.852	1.041	1.089	1.099	0.806	1.113	0.882	0.893	0.888	1.080	1.107	1.150	0.966	1.166	1.226	1.018	0.728	0.968	0.808	1.45E-01
Q09666	5110	S	Neuroblast differentiation-associated protein AHNAK	AHNAK	1	3.95E-09	124.78	FKAEAPLPS(1)PK	2	0.014842	30	0.664	0.705		1.126	1.344	1.16	0.882	0.893	0.888	1.080	1.107	1.150	0.753	0.789		1.043	1.214	1.009	1.411	3.17E-02
Q09666	5782	S	Neuroblast differentiation-associated protein AHNAK	AHNAK	0.999969	1.26E-24	189.13	SNS(1)FSDER	2	-0.082779	33	1.104	0.778	1.088	0.849	1.358	0.823	0.882	0.893	0.888	1.080	1.107	1.150	1.252	0.871	1.225	0.786	1.227	0.716	0.815	3.63E-01
Q09666	93	S	Neuroblast differentiation-associated protein AHNAK	AHNAK	1	1.73E-28	168.29	S(1)PEPGQTWTR	2	-0.43187	36	0.787	0.769	0.792	0.936	1.561	1.155	0.882	0.893	0.888	1.080	1.107	1.150	0.892	0.861	0.892	0.867	1.410	1.004	1.240	2.64E-01
Q09666	5762	S	Neuroblast differentiation-associated protein AHNAK	AHNAK	0.761757	1.90E-18	125.91	AS(0.993)LGS(0.007)LEGEAEAEAS(0.762)S(0.238)PK	2	-0.16271	11		3.127	0.182	0.335		0.357	0.882	0.893	0.888	1.080	1.107	1.150		3.502	0.205	0.310		0.310	0.167	4.48E-01
Q09666	4100	T	Neuroblast differentiation-associated protein AHNAK	AHNAK	1	3.98E-05	77.031	VDIDT(1)PDIDIHGPEGK	3	0.73856	4		0.284		1.362	1.075	1.279	0.882	0.893	0.888	1.080	1.107	1.150		0.318		1.261	0.971	1.112	3.505
Q09666	570	S	Neuroblast differentiation-associated protein AHNAK	AHNAK	0.965134	8.10E-05	80.545	IS(0.965)MS(0.035)EVDLNVAAPK	2	-0.047538	7	1.592	1.139	1.308	0.973	0.498	0.49	0.882	0.893	0.888	1.080	1.107	1.150	1.805	1.275	1.473	0.901	0.450	0.426	0.390	1.33E-02
Q09666	210	S	Neuroblast differentiation-associated protein AHNAK	AHNAK	0.999646	3.67E-35	163.95	LPS(1)GSGAASPTGSAVDIR	2	1.3835	26	0.597	0.641	0.564	1.44	1.538	1.22	0.882	0.893	0.888	1.080	1.107	1.150	0.677	0.718	0.635	1.333	1.389	1.061	1.864	4.96E-03
Q09666	5749	S	Neuroblast differentiation-associated protein AHNAK	AHNAK	0.999999	1.08E-19	138.82	AS(1)LGS(1)LEGEAEAEASSPK	2	0.90752	25	1.232	0.86	0.568	1.079	1.014	1.247	0.882	0.893	0.888	1.080	1.107	1.150	1.397	0.963	0.640	0.999	0.916	1.084	1.000	1.00E+00
Q09666	41	S	Neuroblast differentiation-associated protein AHNAK	AHNAK	0.975617	5.40E-05	58.093	DDGVFVQEVT(0.024)QNS(0.976)PAAR	3	0.018375	3	0.791	0.801		0.78	1.438	1.19	0.882	0.893	0.888	1.080	1.107	1.150	0.897	0.897		0.722	1.299	1.035	1.136	6.11E-01
Q09666	135	S	Neuroblast differentiation-associated protein AHNAK	AHNAK	1	6.26E-139	272.06	LKS(1)EDGVEGDLGETQSR	2	-0.097355	67	0.444	0.681	0.463	1.58	1.666	1.167	0.882	0.893	0.888	1.080	1.107	1.150	0.503	0.763	0.521	1.463	1.505	1.015	2.228	1.46E-02
Q09666	5448	S	Neuroblast differentiation-associated protein AHNAK	AHNAK	1	2.18E-05	86.367	IS(1)APNVDFNLEGPK	3	0.24431	6	1.139	1.375	0.899		0.917	0.669	0.882	0.893	0.888	1.080	1.107	1.150	1.291	1.540	1.012		0.828	0.582	0.550	7.67E-02
Q09666	5077	S	Neuroblast differentiation-associated protein AHNAK	AHNAK	1	2.75E-03	137.28	VDVKS(1)PK	2	0.0085003	3	0.328	0.507		1.005	1.302	1.859	0.882	0.893	0.888	1.080	1.107	1.150	0.372	0.568		0.931	1.176	1.617	2.642	6.43E-02
Q09666	216	S	Neuroblast differentiation-associated protein AHNAK	AHNAK	0.999406	9.44E-71	204.47	LPSGSGAAS(0.999)PTGSAVDIR	2	0.35788	35	0.529	0.556	0.545	1.664	1.341	1.365	0.882	0.893	0.888	1.080	1.107	1.150	0.600	0.623	0.614	1.541	1.211	1.187	2.145	3.58E-03
Q09666	177	S	Neuroblast differentiation-associated protein AHNAK	AHNAK	0.998226	1.21E-07	116.71	DIDIS(0.002)S(0.998)PEFK	2	0.00008867	15	0.752	0.728	0.746	1.418	1.121	1.236	0.882	0.893	0.888	1.080	1.107	1.150	0.853	0.815	0.840	1.313	1.013	1.075	1.356	3.21E-02
Q09666	490	T	Neuroblast differentiation-associated protein AHNAK	AHNAK	1	7.79E-11	124.25	VKT(1)PEMIIQKPK	3	0.11684	52	0.819	0.994	0.846	1.249	1.409	0.684	0.882	0.893	0.888	1.080	1.107	1.150	0.929	1.113	0.953	1.156	1.273	0.595	1.010	9.66E-01
Q09666	5731	S	Neuroblast differentiation-associated protein AHNAK	AHNAK	0.999784	1.21E-15	126.84	GGVTGS(1)PEASISGSK	2	-0.050715	23	1.162	0.966	0.871	1.128	0.638	1.234	0.882	0.893	0.888	1.080	1.107	1.150	1.317	1.082	0.981	1.044	0.576	1.073	0.797	2.94E-01
Q0JRZ9	403	S	F-BAR domain only protein 2	FCHO2	1	1.66E-05	118.77	NLS(1)NEELTK	2	-0.36112	3	1.162	1.033	0.969	1.024	0.974	0.838				1.000						1.024
Q0JRZ9	387	S	F-BAR domain only protein 2	FCHO2	0.918992	6.28E-04	64.249	VSIGNIT(0.024)LS(0.919)PAIS(0.057)R	2	0.53139	1		0.317		1.045	1.177	1.462				1.000						1.045
Q0JRZ9	468	S	F-BAR domain only protein 2	FCHO2	0.999814	8.28E-07	65.197	PTTPLSVGTIVPPPRPAS(1)RPK	3	0.18572	4	1.083	0.427		1.182	1.028	1.28				1.000						1.182
Q0JRZ9	488	S	F-BAR domain only protein 2	FCHO2	0.985225	1.25E-21	87.253	LSGINEIPRPFS(0.985)PPVT(0.009)S(0.003)NT(0.001)S(0.001)PPPAAPLAR	3	0.43968	4	1.077	0.756	0.729	1.166	1.217	1.055				1.000						1.166
Q0JRZ9	394	S	F-BAR domain only protein 2	FCHO2	1	1.01E-03	109.15	HS(1)PVQMNR	2	-0.80223	5	1.01	0.813	0.882		1.181	1.113				1.000
Q0VG06	667	S	Fanconi anemia core complex-associated protein 100	FAAP100	0.999995	1.32E-03	77.124	APS(1)PLGPTR	2	-0.38335	6	1.085	0.962	1.188	0.806	1.058	0.901
Q10570	766	S	Cleavage and polyadenylation specificity factor subunit 1	CPSF1	0.873055	4.18E-07	99.092	RS(0.127)S(0.873)QPPADRDPAPFR	3	-0.2831	9	0.839	0.628	0.924	0.808	1.62	1.18	1.014	1.042	1.058	0.935	0.962	0.989	0.827	0.603	0.873	0.864	1.684	1.193	1.624	1.30E-01
Q10586	86	S	D site-binding protein	DBP	0.999976	1.67E-11	58.325	AALPAATTPGPGLETAGPADAPAGAVVGGGS(1)PR	3	-0.87564	4	1.164		1.035	0.807	0.879	1.115
Q12767	445	S	Transmembrane protein 94	TMEM94	0.790682	1.34E-06	77.53	VEPPHS(0.208)S(0.791)HEDLT(0.001)DGLSTR	3	0.75872	6	1.094	1.138	0.976	0.619		1.172
Q12768	917	S	WASH complex subunit strumpellin	KIAA0196	0.999862	6.71E-02	40.278	TLMNAVS(1)PLK	2	0.35767	1	0.855	0.78		1.074	1.208	1.082	0.997	0.897	0.924	0.943	0.962	1.276	0.858	0.870		1.139	1.256	0.848	1.252	2.59E-01
Q12769	1157	S	Nuclear pore complex protein Nup160	NUP160	0.999987	1.47E-29	113.41	LIRPEYAWIVQPVSGAVYDRPGAS(1)PK	3	-0.32249	37	1.132	0.86	0.878	1.143	0.981	1.006	1.056	1.117	1.129	0.878	0.868	0.951	1.072	0.770	0.778	1.302	1.130	1.058	1.332	7.77E-02
Q12774	11	S	Rho guanine nucleotide exchange factor 5	ARHGEF5	0.975547	1.72E-14	110.26	GAS(0.976)PPIS(0.024)AIEEFSIIPEAPMR	3	0.35045	14	1.017	0.876	0.661	1.615	0.831		1.174	0.781	1.027	1.069	0.982	0.968	0.866	1.122	0.644	1.511	0.846		1.344	3.96E-01
Q12774	450	S	Rho guanine nucleotide exchange factor 5	ARHGEF5	0.992691	7.53E-10	108.45	AEELSPAALS(0.993)PS(0.007)LEPIR	3	0.48055	11	0.878	0.731	0.716	1.158	1.409	1.109	1.174	0.781	1.027	1.069	0.982	0.968	0.748	0.936	0.697	1.083	1.435	1.146	1.539	3.05E-02
Q12774	1126	S	Rho guanine nucleotide exchange factor 5	ARHGEF5	0.831566	6.84E-22	143.83	LESLSET(0.004)PGPS(0.164)S(0.832)PR	2	-0.58832	5	0.825	0.753		0.99		1.432	1.174	0.781	1.027	1.069	0.982	0.968	0.703	0.964		0.926		1.479	1.443	3.51E-01
Q12774	983	S	Rho guanine nucleotide exchange factor 5	ARHGEF5	0.913881	2.82E-04	49.125	T(0.001)T(0.001)PQQGAS(0.083)GPGRS(0.914)PVGQAR	3	-0.5063	1	0.873			0.824		1.303	1.174	0.781	1.027	1.069	0.982	0.968	0.744			0.771		1.346	1.423
Q12789	1868	S	General transcription factor 3C polypeptide 1	GTF3C1	0.99659	7.52E-05	48.686	RAS(0.999)WAS(0.997)ENGET(0.004)DAEGTQMTPAK	3	-1.2247	1		0.839	1.368	0.825		0.968	0.993	0.994	1.001	0.958	1.027	1.028		0.844	1.367	0.861		0.942	0.815	5.21E-01
Q12789	1845	S	General transcription factor 3C polypeptide 1	GTF3C1	0.777388	2.61E-22	113.49	PLEGSS(0.015)S(0.012)EDS(0.777)PPEGQAPPS(0.01)HS(0.184)PR	2	-0.76161	3	1.195		0.837		0.968		0.993	0.994	1.001	0.958	1.027	1.028	1.203		0.836		0.943		0.924
Q12789	1062	S	General transcription factor 3C polypeptide 1	GTF3C1	0.927687	5.50E-80	212.63	KNS(0.928)S(0.071)T(0.001)DQGS(1)DEEGSLQK	2	-0.28422	16	1.36	1.431	1.193	1.044	0.746	0.227	0.993	0.994	1.001	0.958	1.027	1.028	1.370	1.440	1.192	1.090	0.726	0.221	0.509	6.72E-02
Q12789	1865	S	General transcription factor 3C polypeptide 1	GTF3C1	0.999322	7.52E-05	48.686	RAS(0.999)WAS(0.997)ENGET(0.004)DAEGTQMTPAK	3	-1.2247	1		0.839	1.368	0.825		0.968	0.993	0.994	1.001	0.958	1.027	1.028		0.844	1.367	0.861		0.942	0.815	5.21E-01
Q12789	739	S	General transcription factor 3C polypeptide 1	GTF3C1	1	9.70E-12	99.431	TSQPPVPQGEAEEDS(1)QGK	2	1.8313	10	0.83	0.922	0.83	1.133	1.284		0.993	0.994	1.001	0.958	1.027	1.028	0.836	0.928	0.829	1.183	1.250		1.408	5.26E-03
Q12789	1856	S	General transcription factor 3C polypeptide 1	GTF3C1	0.971772	1.11E-36	148.51	PLEGSSSEDSPPEGQAPPS(0.028)HS(0.972)PR	3	0.0436	32	1.089	1.045	0.889	1.269	0.795	0.914	0.993	0.994	1.001	0.958	1.027	1.028	1.097	1.051	0.888	1.325	0.774	0.889	0.984	9.33E-01
Q12789	1068	S	General transcription factor 3C polypeptide 1	GTF3C1	0.999995	5.50E-80	212.63	KNS(0.885)S(0.105)T(0.01)DQGS(1)DEEGSLQK	2	-0.37114	21	1.285	1.259	0.989	0.843	0.718	0.906	0.993	0.994	1.001	0.958	1.027	1.028	1.294	1.267	0.988	0.880	0.699	0.881	0.693	3.43E-02
Q12792	143	S	Twinfilin-1	TWF1	0.775678	6.50E-15	124.4	YLLS(0.049)QS(0.175)S(0.776)PAPLTAAEEELR	2	-0.74141	6	0.791	1.001	0.794	1.039	1.174	1.2	1.003	0.961	0.968	1.077	0.970	1.021	0.789	1.042	0.820	0.965	1.210	1.175	1.264	1.02E-01
Q12802	650	S	A-kinase anchor protein 13	AKAP13	0.806721	3.72E-04	72.359	GKS(0.193)S(0.807)PICSTTGDDK	2	1.3003	3	0.74	1.2	1.337		1.14	0.583	0.994	1.029	0.940	1.036			0.744	1.166	1.422
Q12802	2398	S	A-kinase anchor protein 13	AKAP13	0.903712	1.40E-04	49.765	DMAECS(0.008)T(0.008)PLPEDCS(0.904)PT(0.072)HS(0.008)PR	3	-0.389	1	0.853	0.901	0.846	1.319	1.354	0.727	0.994	1.029	0.940	1.036			0.858	0.876	0.900	1.273			1.450
Q12802	2345	S	A-kinase anchor protein 13	AKAP13	1	6.55E-04	70.802	DEDEGIPS(1)ENEEEKK	2	1.1814	1	0.995	0.958	1.261	0.597	1.378	0.811	0.994	1.029	0.940	1.036			1.001	0.931	1.341	0.576			0.528
Q12802	1565	S	A-kinase anchor protein 13	AKAP13	1	2.93E-03	103.87	RHS(1)WGPGK	2	-0.41057	2	0.652	2.134	0.516	0.802		0.896	0.994	1.029	0.940	1.036			0.656	2.074	0.549	0.774			0.708
Q12802	1647	S	A-kinase anchor protein 13	AKAP13	0.915154	2.55E-05	65.855	VDSLVS(0.083)LS(0.915)EEDLES(0.001)DQR	2	-0.097227	1			1.123	1.04	0.837		0.994	1.029	0.940	1.036					1.195	1.004			0.840
Q12802	983	S	A-kinase anchor protein 13	AKAP13	0.928167	8.85E-08	106.57	ALQLS(0.068)NS(0.928)PGAS(0.003)S(0.001)AFLK	2	0.84484	1	1.678	0.82	0.748	1.019	0.915	0.821	0.994	1.029	0.940	1.036			1.688	0.797	0.796	0.984			0.899
Q12830	2370	S	Nucleosome-remodeling factor subunit BPTF	BPTF	1	2.36E-08	116.55	LS(1)PQMQVHQDK	3	0.84268	18	1.191	0.703	1.27	1.051	0.917	0.869	1.108	1.104	1.053	0.962	0.943	0.829	1.075	0.637	1.206	1.093	0.972	1.048	1.067	7.30E-01
Q12830	216	S	Nucleosome-remodeling factor subunit BPTF	BPTF	1	3.61E-03	81.95	S(1)PILEEK	2	-0.1185	5	1.005	1.149	0.882	0.949	1.148	0.866	1.108	1.104	1.053	0.962	0.943	0.829	0.907	1.041	0.838	0.986	1.217	1.045	1.166	1.67E-01
Q12830	1300	S	Nucleosome-remodeling factor subunit BPTF	BPTF	0.981685	1.03E-07	109.36	VLDDVS(0.007)IRS(0.982)PET(0.011)K	3	-0.06233	10	1.134	1.117	0.629	0.82	1.165	1.135	1.108	1.104	1.053	0.962	0.943	0.829	1.023	1.012	0.597	0.852	1.235	1.369	1.313	2.59E-01
Q12830	2465	S	Nucleosome-remodeling factor subunit BPTF	BPTF	0.999202	1.46E-10	84.646	PQVAAQSQPQS(0.001)NVQGQS(0.999)PVR	3	-0.82707	6	0.781	0.703	0.899	1.796	0.822		1.108	1.104	1.053	0.962	0.943	0.829	0.705	0.637	0.854	1.867	0.872		1.871	1.92E-01
Q12846	117	S	Syntaxin-4	STX4	0.959585	7.15E-04	48.5	AIEPQKEEADENYNS(0.96)VNT(0.04)R	2	-0.92514	1			1.276			0.724	1.271	1.057	1.140	0.912	0.794	0.825			1.119			0.878	0.784
Q12872	743	S	Splicing factor, suppressor of white-apricot homolog	SFSWAP	0.839536	2.07E-23	148.26	PLPTLEVKPPDRPS(0.16)S(0.84)K	3	0.2851	46	1.006	1.227	0.996	0.957	1.228	0.586	1.139	1.003	1.117	0.985	0.880	0.876	0.883	1.223	0.892	0.972	1.395	0.669	1.013	9.60E-01
Q12872	886	S	Splicing factor, suppressor of white-apricot homolog	SFSWAP	0.998522	4.45E-13	101.41	PAAPAAHS(0.999)AHS(0.001)ASVSPVESR	3	-0.23208	4	2.21	0.402	0.163	0.519	1.115	1.591	1.139	1.003	1.117	0.985	0.880	0.876	1.940	0.401	0.146	0.527	1.267	1.816	1.452	6.08E-01
Q12872	604	S	Splicing factor, suppressor of white-apricot homolog	SFSWAP	0.999999	6.18E-17	139.88	VKLDDDS(1)DDDEESK	2	-0.36306	3	1.025	0.805	0.713			1.457	1.139	1.003	1.117	0.985	0.880	0.876	0.900	0.803	0.638			1.663	2.132
Q12873	713	S	Chromodomain-helicase-DNA-binding protein 3	CHD3	0.886504	3.84E-09	96.848	ELQGDGPPS(0.024)S(0.887)PT(0.088)NDPT(0.002)VK	2	0.14832	6	0.978	1.629	0.866	0.715	1.008	0.804	1.156	1.086	0.872	1.232	0.904	0.750	0.846	1.500	0.993	0.580	1.115	1.072	0.829	5.07E-01
Q12873	1601	S	Chromodomain-helicase-DNA-binding protein 3	CHD3	0.999877	8.62E-26	149.53	METEADAPS(1)PAPSLGER	2	-0.96065	11	1.287	1.007	0.855	0.75	1.101		1.156	1.086	0.872	1.232	0.904	0.750	1.113	0.927	0.981	0.609	1.218		0.907	7.20E-01
Q12873	73	S	Chromodomain-helicase-DNA-binding protein 3	CHD3	1	3.84E-10	116.36	KRDS(1)EEEFGSER	3	-0.13466	5	1.161	1.117	1.103	0.712	0.908		1.156	1.086	0.872	1.232	0.904	0.750	1.004	1.029	1.265	0.578	1.004		0.720	2.07E-01
Q12888	398	S	Tumor suppressor p53-binding protein 1	TP53BP1	0.999223	4.47E-14	110.18	QDKPMDTSVLS(0.999)EEGGEPFQK	3	0.29709	8	0.968		1.013	1.109	1.075	0.835	1.051	1.086	1.088	0.937	0.929	0.908	0.921		0.931	1.184	1.157	0.920	1.174	2.35E-01
[truncated: 3,993 more rows]
